# Supplementary material for: DNA methylation profiles of diverse Brachypodium distachyon align with underlying genetic diversity
Source: Genome Res. 2016 Nov;26(11):1520–31. doi: 10.1101/gr.205468.116 (PMC5088594; doi:10.1101/gr.205468.116)
Supplement: Supplemental Material [file supp_gr.205468.116_Supplemental_Table_1.xlsx]

## Sheet: Sheet1
Supplemental Table 1: Bisulfite sequencing summary statistics
Genotype	Raw reads*a	QC reads	unique PE mapped	unique SE mapped	Mapping Efficency (%)	CG methylation (%)	CHG methylation (%)	CHH methylation (%)	Average Coverage (x)*b	Bisulfite Conversion rate (%)*c	NCBI SRA Run
Bd21	27885848	27507566	10948818	11061457	80	63.4	41	2.26667	8.11888	99.24	SRR1972494
Bd21-3	60401198	59732174	22085792	22454153	74.5	59.6	38.1	1.8	16.4293	99.35	SRR1972495
Bd1-1	72598150	71788886	20627978	27001079	66.346	54.8333	30.9	1.76667	17.5688	99.15	SRR1972498
Bd3-1	46153770	45325378	11951466	21175959	73.088	64.7	44.6667	2.2	12.2196	99.16	SRR1972496
Bd30-1	30865290	30100024	7513720	12787191	67.4448	65.9667	46.7667	2.43333	7.48835	99.18	SRR1972497
BdTR12C	56489504	55332538	14511020	23189657	68.1347	64.5333	41.5667	2.2	13.9066	99.1	SRR1972499
Koz3	64874686	64033280	22048814	23502198	71.1365	63.3333	42.3	2.1	16.8023	99.29	SRR1972500
a	count of all individual reads, not taking into account paired-end status
b	Based on 271.1Mb size of combined chromosome sequence
c	Assessed via Bd21 chloroplast sequence
