# Supplementary material for: DNA methylation profiles of diverse Brachypodium distachyon align with underlying genetic diversity
Source: Genome Res. 2016 Nov;26(11):1520–31. doi: 10.1101/gr.205468.116 (PMC5088594; doi:10.1101/gr.205468.116)
Supplement: Supplemental Material [file supp_gr.205468.116_Supplemental_Table_2.xlsx]

## Sheet: Sheet1
Supplemental Table 2: List of CG/CHG Differentially Methylated Regions
class	dmrid	contrast	chrom	start	stop	size	type	Bd1.1_CpG	Bd21.3_CpG	Bd21_CpG	Bd30.1_CpG	Bd3.1_CpG	BdTR12c_CpG	Koz.3_CpG	Bd1.1_CHG	Bd21.3_CHG	Bd21_CHG	Bd30.1_CHG	Bd3.1_CHG	BdTR12c_CHG	Koz.3_CHG	Bd1.1_CHH	Bd21.3_CHH	Bd21_CHH	Bd30.1_CHH	Bd3.1_CHH	BdTR12c_CHH	Koz.3_CHH
CGDMR	3	Bd1-1	Bd1	22400	22599	199	hyper	0.925926	0	0.0652174	0	0	0.155738	0	0.0660377	0	0	0	0	0.0454545	0	0.00492611	0	0	0	0	0	0
CGDMR	4	Bd1-1	Bd1	22700	22999	299	hyper	0.974227	0.421384	0	0.0126582	0	0.559259	0.501639	0.0316456	0.0683761	0	0.0645161	0	0	0	0.00594059	0.00217391	0.00740741	0	0	0.00501253	0.0137363
CGDMR	11	Bd1-1	Bd1	50500	51199	699	hypo	0.0063857	0.00420168	0.978541	0.00612245	NA	0.00532623	0.00452489	0.00404858	0.00379507	0.115702	0.0185185	NA	0.0153509	0.00675676	0.00705128	0.00873362	0.00645161	0.0014881	NA	0.00842912	0.0105777
CGDMR	16	Bd1-1	Bd1	95100	95299	199	hypo	0.0841584	0.968064	0.929936	0.962843	0.855769	0.955531	0.921005	0.031401	0.0314342	0.0689655	0.450727	0.273408	0.599796	0.108911	0.00651702	0.00983405	0.00374532	0.00521376	0.00469484	0.00526489	0.00392377
CGDMR	19	Bd1-1	Bd1	101100	101399	299	hyper	0.809756	0	0	0	0	0.047619	0.1	0.055	0	0	0	0	0.0263158	0.0111111	0.00581395	0.013986	0	0.017094	0.00558659	0.00348432	0.0102041
CGDMR	20	Bd1-1	Bd1	102500	103199	699	hyper	0.897101	0.0225225	0.0120482	0	0	0.0666667	0.0380623	0.62622	0.0180412	0.027972	0.0232558	0.0175439	0.0108696	0.0268041	0.0185669	0.00772947	0.0178174	0.00729927	0.0212121	0.00710059	0.0115804
CGDMR	25	Bd1-1	Bd1	130200	130799	599	hyper	0.959459	0.921131	0.0128205	0.993443	0.972727	0.949054	0.96402	0.207921	0.361493	0.0188679	0.213675	0.242144	0.0512295	0.19338	0.0100756	0.0166667	0.00857143	0.00486618	0.00655201	0.00742574	0.00963222
CGDMR	34	Bd1-1	Bd1	171500	171699	199	hypo	0.0408163	0.836879	0.962025	0.0909091	0.1	0.00769231	0.966942	0.0172414	0.0985915	0.315789	0	0	0.031746	0.228814	0	0.00909091	0.027972	0	0	0.009375	0.0023753
CGDMR	36	Bd1-1	Bd1	174800	176099	1299	hyper	0.886857	0.951165	0.0324006	0.35859	0.931091	0.00841969	0.935458	0.0398532	0.420587	0.0265306	0.0146699	0.116183	0.0102326	0.740902	0.00803213	0.0103708	0.00470588	0.00679117	0.00395909	0.00814536	0.0203448
CGDMR	38	Bd1-1	Bd1	219800	219999	199	hyper	0.962963	0	0	NA	NA	0.818182	1	0.322581	0	0.105263	NA	NA	0.521739	0.4	0	0	0	NA	NA	0.32	0
CGDMR	40	Bd1-1	Bd1	250600	251399	799	hyper	0.931638	0.00787402	0.0125	0	0.0207254	0.0176211	0.00320513	0.266129	0.0166667	0	0	0	0	0.00448431	0.0117734	0.00797448	0.00249377	0.00387597	0.0043573	0.00549451	0.0091638
CGDMR	44	Bd1-1	Bd1	301800	302799	999	hyper	0.954286	0.960198	0.0512821	0.977492	0.970816	0.941899	0.92386	0.680392	0.75054	0.0278884	0.696143	0.79523	0.667398	0.537728	0.0168194	0.0155656	0.00804289	0.00990099	0.0110029	0.011623	0.0126798
CGDMR	48	Bd1-1	Bd1	323300	323499	199	hypo	0.0217391	0.348485	0.954545	0.916667	0.651163	1	1	0	0.0363636	0.1	0.0625	0.030303	0.172414	0.0625	0.00645161	0	0	0.0108696	0.0135135	0	0.003367
CGDMR	55	Bd1-1	Bd1	348100	348299	199	hypo	0.0285714	0.979381	0.923077	0	0.966102	0.904762	0.811594	0	0.539773	0.191489	0.00757576	0.0246914	0.139394	0.150943	0.00647249	0.0105152	0.00549451	0.00428265	0.00829875	0.00719425	0.0121396
CGDMR	56	Bd1-1	Bd1	352400	352699	299	hypo	0.104457	0.960759	0.978648	0.031746	0.0694789	0.302913	0.296842	0.0443975	0.595794	0.565854	0	0.026455	0.0510638	0.0815603	0.0230769	0.0147059	0.00627615	0.0148515	0.0030581	0.00877193	0.0116279
CGDMR	68	Bd1-1	Bd1	477900	478199	299	hypo	0.100304	0.823529	0.91958	0.107884	0.011194	0.693164	0.849275	0.0206186	0.360195	0.479554	0.107759	0.0132159	0.372007	0.405213	0.00826446	0.00798631	0.0109546	0.00557103	0.00226244	0.0143805	0.00604064
CGDMR	69	Bd1-1	Bd1	482700	482899	199	hypo	0.111111	0.96	1	1	1	1	0.785714	0.214286	0.346154	0.636364	0.636364	0.911111	0.538462	0.638889	0.0222222	0.00552486	0	0.0192308	0.0254777	0	0.0697674
CGDMR	75	Bd1-1	Bd1	504200	504399	199	hyper	0.874332	0.0110701	0	0	0.00598802	0	0.00864553	0.69244	0.0111111	0.0294118	0.0107527	0.0183486	0.0253165	0	0.0962838	0.00185529	0.00503778	0	0.0167785	0.00826446	0.00537634
CGDMR	93	Bd1-1	Bd1	665900	666199	299	hypo	0	0.759162	0.854167	0	0	0.797101	0.041958	0	0.317829	0.285714	0.166667	0	0.263158	0.0561798	0.00401606	0.0227273	0.0662252	0	0	0.0333333	0.0174216
CGDMR	95	Bd1-1	Bd1	680700	680899	199	hypo	0.0535714	0	0.913043	1	0	1	0	0.0588235	0	0.285714	1	0	0.444444	0	0.0182648	0	0	0	0	0.00990099	0
CGDMR	98	Bd1-1	Bd1	736200	736699	499	hyper	0.958333	0.00691244	0.0132743	0.0291971	0.0109091	0.0175439	0.0162272	0.506567	0.019337	0.00531915	0.0310559	0.0253807	0.00425532	0.0129534	0.00925314	0.00206612	0.00350877	0.00611621	0.0194932	0.00615385	0.00682261
CGDMR	99	Bd1-1	Bd1	736900	737199	299	hyper	0.943966	0.120482	0.05	0	0	0	0.1	0.722222	0.00787402	0	0	0	0.0222222	0.0169492	0.00748663	0.00273224	0	0	0.0114943	0	0.00534759
CGDMR	100	Bd1-1	Bd1	741400	741899	499	hypo	0.0224215	0.960114	0.983193	1	0.980843	0.959627	0.975824	0.014218	0.717277	0.78125	0.776271	0.734177	0.756983	0.713163	0.00461361	0.00999167	0.0192308	0.0157233	0.0126874	0.00973783	0.014997
CGDMR	101	Bd1-1	Bd1	742000	743199	1199	hypo	0.0138135	0.958426	0.973684	0.983365	0.966025	0.979247	0.965318	0.0136986	0.664934	0.78056	0.791536	0.702046	0.73873	0.772195	0.00436681	0.00905584	0.00963597	0.0121338	0.00979325	0.0122173	0.0116129
CGDMR	108	Bd1-1	Bd1	786000	786399	399	hyper	0.927565	0.0100604	0.00566572	0	0.909798	0.0046083	0.00497512	0.24878	0.00557103	0	0.0322581	0.155702	0.0123457	0.0223714	0.0136612	0.0069808	0.00742574	0.017316	0.0497312	0	0.0065703
CGDMR	109	Bd1-1	Bd1	786900	787099	199	hyper	0.904459	0.00302115	0	0	0	0	0.00476191	0.48996	0	0	0	0.0235294	0	0.0120482	0.00136612	0	0.00840336	0	0	0	0.00694444
CGDMR	111	Bd1-1	Bd1	789700	789899	199	hyper	0.896552	0.0188679	0.0363636	0	0.0280374	0.020202	0.0235294	0.142857	0	0	0	0.0120482	0	0.0384615	0	0.00420168	0	0	0.00854701	0.0114286	0
CGDMR	114	Bd1-1	Bd1	791700	791999	299	hypo	0.0526316	0.968586	0.994186	0.986301	0.994828	0.97724	0.970944	0.127907	0.834254	0.878561	0.861905	0.884892	0.861771	0.861858	0	0.00964489	0.0215606	0.0221654	0.0180602	0.0199676	0.013181
CGDMR	116	Bd1-1	Bd1	800300	800999	699	hypo	0.00609756	0.225641	0.970588	0.413043	0.102941	0	0.289617	0.0339806	0.0754717	0.336364	0	0	0.00980392	0.210811	0.00990099	0.00212766	0.0168539	0	0	0.0100503	0.0320611
CGDMR	120	Bd1-1	Bd1	829000	830099	1099	hypo	0.0128205	0.587007	0.95203	0.694444	0.00561798	0.294737	0.684211	0.00884956	0.0795181	0.480916	0.432099	0.0126582	0.147887	0.439597	0.00844773	0.0183406	0.00938967	0.0199005	0.00613497	0.004914	0.015873
CGDMR	121	Bd1-1	Bd1	832300	832899	599	hyper	0.951662	0.342756	0.016	0.949721	0	0.0505618	0.012605	0.00792393	0.00851064	0.00806452	0.0114504	0.003861	0.00638978	0.0215311	0.0027027	0.00962464	0.00819672	0.0106383	0.0119658	0.00148368	0.00641711
CGDMR	122	Bd1-1	Bd1	834400	834599	199	hyper	0.975	0.827586	0.0151515	1	0.8125	0.709677	0.743119	0.003663	0	0	0	0	0.0212014	0.00408163	0.0137615	0.0112867	0.0102041	0.0125786	0.01	0.0159817	0.00724638
CGDMR	123	Bd1-1	Bd1	834700	835499	799	hyper	0.905225	0.152083	0.010101	0.964646	0.058651	0.016129	0.00786164	0.012218	0.00831025	0	0.017673	0.0110132	0.00588235	0.0113208	0.0127808	0.00397351	0.00444444	0.00135962	0.00596422	0.00650759	0.00798631
CGDMR	126	Bd1-1	Bd1	848700	849099	399	hypo	0.00303951	0.33222	0.863248	0	0.833333	0.753398	0.00510204	0.00325733	0.106024	0.320988	0.0465116	0.229787	0.265714	0.0112994	0	0.054023	0.0737101	0	0.0642292	0.02407	0.00512821
CGDMR	131	Bd1-1	Bd1	862300	862799	499	hyper	0.910204	0.865772	0	0.894737	0.0204082	0.955556	0.75	0.00434783	0.0199005	0.00884956	0.108108	0	0.0714286	0	0.00844595	0.00948767	0.00311526	0.025641	0	0.0128205	0.00613497
CGDMR	149	Bd1-1	Bd1	939600	939799	199	hyper	0.944444	0.0185185	0	0	0.0434783	0.5	0	0.653285	0	0	0	0.0571429	0	0	0.0490724	0.00410678	0.016129	0	0	0	0.0322581
CGDMR	152	Bd1-1	Bd1	958900	959299	399	hypo	0.0671785	0.847317	0.933735	0.781651	0.886007	0.00557103	0.781132	0.0103896	0.0295858	0.0212766	0.00823045	0.0205607	0.00996678	0.0279503	0.0031348	0.0106925	0.00804289	0.00187266	0.00808625	0.00555556	0.0111111
CGDMR	154	Bd1-1	Bd1	965600	965799	199	hyper	0.841463	0	0	0	0	0.030303	0.0526316	0.00438597	0.0314961	0	0	0	0.057971	0	0.00860585	0.00261097	0	0	0	0.0164835	0.00903615
CGDMR	161	Bd1-1	Bd1	1014100	1014299	199	hypo	0	0.984848	0.978261	0	0.933333	0.985915	0.764706	0	0.534483	0.880597	0	0.886598	0.8	0.4	0.00952381	0	0.00877193	0	0	0.0162602	0.0363636
CGDMR	166	Bd1-1	Bd1	1035600	1036099	499	hyper	0.954373	0.0122449	0.00952381	0.957614	0.00353357	0.939236	0.00763359	0.561404	0.00743494	0	0.728232	0.0127389	0.775068	0.0135135	0.0248509	0.0154639	0.00387597	0.0231065	0.00938967	0.0234375	0.00681818
CGDMR	167	Bd1-1	Bd1	1041500	1041699	199	hypo	0.0159091	0.909302	0.945455	0.2	0.903614	0.00862069	0.105072	0.0070922	0.486275	0.303571	0	0.153846	0.00724638	0.0176211	0	0.0101868	0	0	0	0	0.00350877
CGDMR	168	Bd1-1	Bd1	1053400	1053799	399	hypo	0.0153061	0.872093	0.91018	0.910112	0.773585	0.012987	0.902222	0.0210526	0.189024	0.181818	0.326923	0.246575	0.0181818	0.374101	0.00819672	0.0155642	0.002079	0.0134048	0.00431035	0.0364963	0.00582524
CGDMR	169	Bd1-1	Bd1	1094500	1094799	299	hyper	0.933333	0.00483092	0.00966184	NA	0	0	0.00921659	0.375	0	0.00440529	NA	0.00414938	0.00319489	0.00649351	0	0.00220264	0	NA	0.00772201	0.00209205	0.00884956
CGDMR	173	Bd1-1	Bd1	1146400	1146599	199	hyper	0.766304	0.0178571	0	0	0	0.93	0	0.00689655	0	0.0377358	0	0	0.0375	0	0.00516796	0.025	0.0238095	0	0	0.0128205	0.00581395
CGDMR	179	Bd1-1	Bd1	1175400	1175599	199	hypo	0.0180723	0.787736	1	0	0	0	0.918033	0.00645161	0	0.0232558	0	0.0144928	0	0.07	0.00533808	0.0160183	0	0	0.0304878	0.00436681	0.00397351
CGDMR	181	Bd1-1	Bd1	1205400	1205999	599	hyper	0.88189	0.120855	0.0634615	0.0714286	0.185413	0.431818	0.121404	0.696462	0.0152749	0.00483092	0.0207792	0.0747863	0.379518	0.0369588	0.0159119	0.00803213	0.0217028	0.00722892	0.00722022	0.00754717	0.00977995
CGDMR	185	Bd1-1	Bd1	1236700	1236999	299	hyper	0.980663	0	0	0	0	0	0.00724638	0.54878	0.0273973	0	0	0	0	0	0.0107034	0	0	0.0121951	0	0	0.00930233
CGDMR	194	Bd1-1	Bd1	1277200	1277499	299	hypo	0.0135135	0.661808	0.836842	0.0175439	0.59633	0	0	0.0102041	0.374468	0.3	0	0.402778	0	0	0.0149701	0.100134	0.0602679	0.0159574	0.0719424	0	0
CGDMR	201	Bd1-1	Bd1	1343400	1343799	399	hyper	0.958814	0.573801	0	0.929412	0.0202429	0.97075	0.00367647	0.490672	0.110837	0.0124224	0.4	0.00934579	0.519231	0.00995025	0.0322581	0.00812065	0.0108696	0.0498534	0.035443	0.0343949	0.00261097
CGDMR	208	Bd1-1	Bd1	1388700	1388899	199	hypo	0	0.794118	1	1	0.947368	0.847826	0.979592	0.02	0	0	0	0	0	0.0394737	0.00760456	0	0.010101	0	0.03	0	0
CGDMR	209	Bd1-1	Bd1	1394600	1395299	699	hypo	0.0137825	0.954751	0.966038	0	0.968811	0.0148148	0.0633333	0.0275689	0.771619	0.802885	0.0330579	0.730667	0.00763359	0.0509554	0.00928793	0.00902256	0.0097493	0.0105541	0.0102804	0.0191781	0.0102669
CGDMR	211	Bd1-1	Bd1	1409200	1409499	299	hypo	0.168224	0.888889	0.945205	0	0.605882	0	0.0175439	0	0.213333	0.4	0	0.125	0	0	0.0818966	0.0574257	0.0711744	0	0.08	0.00990099	0
CGDMR	212	Bd1-1	Bd1	1417800	1417999	199	hyper	0.944444	0	0	NA	0	0	0	0.025	0	0.0384615	0.111111	0	0	0	0.00242131	0	0	0	0.00763359	0	0.0166667
CGDMR	214	Bd1-1	Bd1	1422600	1422799	199	hyper	0.96	0	0	1	1	0.974359	0.0119048	0.413043	0	0	0.166667	0	0.72	0.0357143	0.0259259	0	0.0175439	0	0.0533333	0.0130435	0
CGDMR	219	Bd1-1	Bd1	1494200	1494399	199	hypo	0	0	1	0	0	0.747573	0.0344828	0	0	0.0909091	0	0	0.0307692	0	0.0227273	0.00970874	0.0104167	0	0.0151515	0.0165016	0.00847458
CGDMR	223	Bd1-1	Bd1	1534600	1535799	1199	hypo	0.0098434	0.746716	0.878745	0.758551	0.909006	0.0130804	0.849386	0.0127946	0.13676	0.422172	0.164609	0.496201	0.00960615	0.188814	0.00616197	0.00797414	0.00946215	0.00650325	0.0103333	0.010846	0.00792844
CGDMR	224	Bd1-1	Bd1	1540000	1540399	399	hypo	0	0.569307	0.935897	0.615385	0.721805	0.0116279	0.773006	0	0.0333333	0.0194805	0.00917431	0.00645161	0.0421053	0.0625	0.00932401	0.0116086	0.00469484	0	0.00478469	0	0.00359066
CGDMR	225	Bd1-1	Bd1	1540500	1540699	199	hypo	0	0.611111	0.967742	1	0.0625	0	0.5	0	0	0.0208333	0	0	0	0	0	0	0.00696864	0.0333333	0	0	0.00930233
CGDMR	231	Bd1-1	Bd1	1575700	1575899	199	hypo	0	0	0.935484	1	0	0.173913	0.959459	NA	0	0.5	NA	0	NA	0.533333	0.00387597	0.0142857	0	0.193548	0	0.00675676	0.0144404
CGDMR	233	Bd1-1	Bd1	1576400	1576899	499	hypo	0	0.0147059	0.96319	0	0	0.961722	0.926471	0.00980392	0.027027	0.634731	0	0.0212766	0.65942	0.699482	0.01002	0.00680272	0.00860215	0.00793651	0	0.0153649	0.0171198
CGDMR	234	Bd1-1	Bd1	1582300	1582499	199	hypo	0.0925926	0.357143	0.904762	0.0740741	0	0.0810811	0	0.0215054	0.00869565	0	0	0	0	0.0133333	0.005	0.00507614	0	0.015873	0	0	0.00813008
CGDMR	236	Bd1-1	Bd1	1586000	1586899	899	hypo	0.00728597	0.965779	0.975472	0.967587	0.00548446	0.00466201	0.0049505	0.0110837	0.649038	0.724638	0.621277	0.0170732	0.00383142	0.0117878	0.00536062	0.00666112	0.00997506	0.0156128	0.00519481	0.00825082	0.00635209
CGDMR	240	Bd1-1	Bd1	1639000	1639299	299	hypo	0.00471698	0.877551	0.942529	0.2	0.474138	0	0.37963	0	0.0740741	0.0425532	0	0.00840336	0	0	0.00247219	0.00417537	0.00531915	0	0.00302115	0.00568182	0.0235294
CGDMR	241	Bd1-1	Bd1	1642600	1642899	299	hyper	0.877551	0.00884956	0.0555556	0	0.0238095	0	0	0.6	0.0147059	0.0454545	0.0434783	0.0208333	0.0294118	0.00819672	0.151456	0.0137931	0.0964912	0.00909091	0.0136986	0	0.0111111
CGDMR	244	Bd1-1	Bd1	1676300	1676499	199	hyper	0.948276	0.956522	0.0714286	1	1	0.976744	1	0.813953	0.789157	0	0.642857	0.206897	0.944444	0.0714286	0.0155039	0.0110041	0	0.0169492	0.013986	0.045977	0.0190476
CGDMR	245	Bd1-1	Bd1	1682900	1683399	499	hypo	0.0111111	0.876827	0.904762	0.0282486	0.912929	0	0.727273	0.00724638	0.33584	0.394366	0	0.395189	0	0.188854	0.0177515	0.0162455	0.0302376	0.0122699	0.0161871	0.0138889	0.0154242
CGDMR	255	Bd1-1	Bd1	1778700	1778999	299	hyper	0.869231	0.012	0	0.267241	0.652968	0.037594	0.809375	0.014652	0.00682594	0	0	0.00735294	0	0.00342466	0.0111888	0.0131579	0.008	0.0225225	0	0	0.0083682
CGDMR	259	Bd1-1	Bd1	1827700	1827899	199	hyper	0.909091	0.666667	0	0.75	0.823529	0.5	0.92	0	0	0	0	0	0.0416667	0	0.00496278	0.00215983	0.0133333	0	0	0	0
CGDMR	265	Bd1-1	Bd1	1886200	1886399	199	hyper	0.825472	0.5	0	0.0114504	0.188811	0.25	0.928339	0.0056338	0.0117302	0.00588235	0.0125	0.00434783	0.00775194	0.0344168	0.00483092	0.0133333	0	0	0	0.0583658	0.0157171
CGDMR	273	Bd1-1	Bd1	1980200	1980399	199	hypo	0.0487805	0.75	0.909091	0.636364	0.857143	0.653846	0.916667	0.104167	0.419355	0.478261	1	0.705882	0.36	0.487179	0.0264423	0.0960784	0.107692	0.170984	0.10299	0.0997506	0.224409
CGDMR	279	Bd1-1	Bd1	2015900	2016099	199	hypo	0.08	0.837838	0.964912	0.980769	1	0.891892	0.921569	0	0.368421	0.733333	0.846154	0	0.714286	0.611111	0	0.0391304	0.060241	0.0308642	0.125	0	0.0351759
CGDMR	291	Bd1-1	Bd1	2085200	2085499	299	hyper	0.885714	0.039604	0.1	0.0135135	0.870229	0.857143	0.354331	0.0516129	0.0104712	0.00806452	0.0378788	0.0280374	0.0428571	0.0123967	0.00476191	0.00182149	0.00580271	0.016129	0.00758534	0.00931099	0.00965517
CGDMR	296	Bd1-1	Bd1	2142100	2142599	499	hypo	0.100402	0.726597	0.95	0.958333	0.933148	0.00465116	0.908178	0.0241379	0.0510638	0.445	0.276596	0.411371	0	0.274276	0.00762195	0.0275027	0.0224949	0	0.00608828	0.00595238	0.00906842
CGDMR	297	Bd1-1	Bd1	2153900	2154299	399	hyper	0.9375	0.0266075	0.00757576	0.972028	0.00630915	0.0214724	0	0.559767	0.0336134	0.028169	0.656934	0.035503	0.011976	0.00884956	0.004315	0.00701262	0.0127226	0.0231214	0.00992556	0.0149893	0.00470958
CGDMR	298	Bd1-1	Bd1	2161500	2161699	199	hyper	0.94086	0	0.0126582	0.866142	0.94898	0	0	0.0163934	0	0	0.025	0.109827	0	0	0.00793651	0	0	0.0175439	0.00970874	0	0
CGDMR	299	Bd1-1	Bd1	2161800	2161999	199	hyper	0.951807	0.5	0.125	1	1	0	0	0.0176991	0.0241935	0	0	0.027027	0	0	0.0114943	0.00653595	0	0	0	0.0238095	0
CGDMR	300	Bd1-1	Bd1	2176500	2176699	199	hypo	0	0	1	NA	1	0.0526316	1	0.00900901	0.0285714	0	NA	0	0	0	0	0.00917431	0	NA	0	0.0246914	0
CGDMR	303	Bd1-1	Bd1	2202100	2202399	299	hypo	0	0.974432	0.953668	0.965909	0.969231	0.944444	0.962264	0.0188679	0.758621	0.744526	0.783505	0.81962	0.713208	0.611111	0	0.0215054	0.0333333	0.00416667	0.0144092	0.00337838	0.0231317
CGDMR	304	Bd1-1	Bd1	2202500	2202899	399	hypo	0	0.961905	0.97491	0.953099	0.91619	0.954693	0.948759	0	0.594272	0.486438	0.573883	0.375207	0.633094	0.663313	0.00574713	0.0323276	0.0130475	0.013013	0.00679117	0.00644641	0.00564546
CGDMR	308	Bd1-1	Bd1	2241700	2241999	299	hypo	0.00943396	0.0113636	0.956522	0.55625	0.432177	0.473418	0.604167	0	0.0186047	0.560976	0.111111	0.0983607	0.215873	0.284153	0.00580271	0.0108893	0	0.00904977	0.00511073	0.00253485	0.00232288
CGDMR	310	Bd1-1	Bd1	2277800	2278099	299	hypo	0	0.93617	1	1	0.875	0.147059	0.878049	0.0289017	0.027027	0	0	0	0.0307692	0	0.00188679	0.0103806	0.00699301	0	0	0.0160428	0.00462963
CGDMR	312	Bd1-1	Bd1	2280000	2280399	399	hypo	0.0108932	0.800319	0.936306	0.877805	0.863539	0.745536	0.854714	0.0181087	0.0141388	0.00980392	0.0178571	0.0153374	0.0134357	0.0130208	0.00504202	0.00140449	0.0106667	0.00735294	0.00479386	0.00477897	0.000672495
CGDMR	315	Bd1-1	Bd1	2307400	2308399	999	hypo	0.0132365	0.972901	0.971349	0.404884	0.973193	NA	0.9608	0.0070373	0.554617	0.608997	0.0105263	0.630158	NA	0.56813	0.009113	0.00693642	0.00821745	0.0158343	0.00615475	NA	0.00865017
CGDMR	316	Bd1-1	Bd1	2322200	2322399	199	hypo	0	0	1	0	0	0	0.0384615	0	0	0.319149	0	0	0.025	0.0659341	0.0149254	0.0298507	0.0116959	0.125	0	0.0738255	0.0217391
CGDMR	317	Bd1-1	Bd1	2324700	2324999	299	hypo	0	0.945946	1	0	0.882353	0.863636	0.613636	0	0.217391	0	0	0	0	0.285714	0.00423729	0.008	0.02	0	0	0.0119048	0
CGDMR	319	Bd1-1	Bd1	2333000	2333199	199	hypo	0.01875	0.879828	0.96748	0.978261	0.984848	0.877551	0.948617	0.0145985	0.627451	0.630952	0.560976	0.638889	0.658537	0.633166	0.0137255	0.031746	0.0239521	0.0102041	0.0287356	0.0442656	0.00980392
CGDMR	320	Bd1-1	Bd1	2338700	2339099	399	hypo	0	0.104348	0.98	0.0555556	0	0.13	0.015625	0.00793651	0.00840336	0.112903	0	0.0181818	0.00862069	0	0	0	0.0151515	0	0	0.00757576	0.00403226
CGDMR	321	Bd1-1	Bd1	2345500	2345899	399	hypo	0.00243902	0.374074	0.909502	0.0049505	0.949309	0.454756	0.957075	0	0.02	0	0	0.0522388	0.0177778	0.0405063	0.0057971	0.0116732	0.0139276	0.00465116	0	0	0.00113766
CGDMR	327	Bd1-1	Bd1	2380000	2380399	399	hyper	0.930233	0.119048	0	0.692308	0.487179	0.0454545	0.278689	0.0392157	0	0	0	0.024	0.0481928	0.0283688	0.00496689	0.00448431	0	0	0	0	0.00940439
CGDMR	329	Bd1-1	Bd1	2397800	2397999	199	hyper	1	0.342857	0	0.833333	0	0	0.75	0.0201342	0.0140845	0.0227273	0	0.105263	0.0238095	0.0227273	0.00829875	0	0	0	0.0294118	0	0
CGDMR	332	Bd1-1	Bd1	2419900	2420199	299	hyper	0.876238	0.95935	0.0454545	1	0	0.914286	0.0246914	0.272727	0.103448	0	0.326923	0	0.075	0	0.00622407	0.00353357	0.00917431	0.00425532	0.00952381	0.00446429	0.00714286
CGDMR	337	Bd1-1	Bd1	2432200	2433099	899	hypo	0.0219298	0.957205	0.975078	0.948387	0.939698	0.961538	0.960168	0.0274725	0.48157	0.573643	0.515385	0.587891	0.488806	0.55132	0.0407524	0.0152225	0.0148026	0.0240964	0.0159109	0.0111421	0.020076
CGDMR	339	Bd1-1	Bd1	2456600	2456799	199	hypo	0	0.618056	0.878049	0.77027	0.747826	0.266667	0.587629	0.00699301	0.00888889	0.0163934	0.00680272	0.0287356	0	0.00735294	0.00371747	0.0028777	0.00966184	0.00963391	0.00180505	0.00234742	0.00601202
CGDMR	342	Bd1-1	Bd1	2469900	2470399	499	hyper	0.90411	0.0189873	0	0	0	0	0.0769231	0.0103359	0.00826446	0	0	0.0431655	0.00558659	0.00564972	0.00575816	0.0107914	0.00555556	0	0	0.00680272	0.00222717
CGDMR	343	Bd1-1	Bd1	2470600	2470899	299	hyper	0.975	0.761905	0.0625	0.333333	0	0	0.878049	0.0188679	0.016129	0	0	0	0.0348837	0.0125	0.00382409	0.00766283	0.00684931	0	0	0.00606061	0.00607903
CGDMR	349	Bd1-1	Bd1	2472600	2472899	299	hyper	0.985075	0	0	0	0	0	0	0.0238095	0	0.0227273	0	0.00925926	0.0107527	0	0.00771605	0.0091954	0.0107527	0	0	0.0121654	0.00314465
CGDMR	350	Bd1-1	Bd1	2473000	2473199	199	hyper	0.909091	0	0	0.5	0.8	0	0.222222	0	0	0	NA	0	0	0	0	0	0.0196078	0	0.0186916	0	0.02
CGDMR	351	Bd1-1	Bd1	2473400	2473999	599	hyper	0.913793	0.0176991	0	0	0.00990099	0.0173913	0.012987	0.011583	0.00411523	0.0198676	0.0110497	0.0132159	0.0139535	0.0117994	0.00592885	0.00639854	0.00268096	0.0199336	0.00453515	0.00648749	0
CGDMR	352	Bd1-1	Bd1	2474200	2474699	499	hyper	0.844388	0.0561404	0	0	0	0.0168539	0.0228571	0.0313779	0.00191571	0.0119048	0.0148148	0	0.0124611	0.0117302	0.0206463	0.00338601	0.00325733	0	0.00315457	0.0120968	0.00476947
CGDMR	360	Bd1-1	Bd1	2585600	2585799	199	hyper	0.944882	0.025641	0	0	0	0.0210526	0.0151515	0.601399	0	0	0.00847458	0.0140845	0.0191083	0.00446429	0.0692884	0	0	0.0052356	0.0190476	0.00377358	0.0136519
CGDMR	372	Bd1-1	Bd1	2662100	2662999	899	hyper	0.95628	0.020284	0.0087146	NA	NA	NA	NA	0.694295	0.0124113	0.00887574	NA	NA	NA	NA	0.0189555	0.00066357	0.00603136	NA	NA	NA	NA
CGDMR	373	Bd1-1	Bd1	2663100	2663299	199	hyper	0.97561	0	0	NA	NA	NA	NA	0.864865	0	0	NA	NA	0	NA	0.00492611	0	0	NA	NA	0	NA
CGDMR	374	Bd1-1	Bd1	2664000	2664199	199	hyper	0.897727	0.333333	0	NA	NA	NA	NA	0.824818	0	0	NA	NA	NA	NA	0.0172786	0	0	NA	NA	NA	NA
CGDMR	378	Bd1-1	Bd1	2731400	2731699	299	hyper	0.943463	0.00409836	0.010989	0.01	0.00505051	0	0.0184049	0.411765	0.0206186	0	0.0333333	0.0128205	0.0366972	0	0.00677201	0.00397614	0.0154639	0	0	0	0.00666667
CGDMR	390	Bd1-1	Bd1	2806300	2806499	199	hypo	0	0.918367	1	1	0.6	1	0.947368	0	0.695652	0.818182	0.866667	1	0.933333	0.738095	0	0.0301624	0.0285714	0	0.0172414	0.0040404	0.0169492
CGDMR	396	Bd1-1	Bd1	2862200	2862399	199	hyper	0.947712	0.0152672	0	0	0.137931	0	0.0127389	0.0225225	0	0.0392157	0	0	0	0.0224215	0	0.00618557	0.00970874	0	0.00540541	0.0027248	0.0103734
CGDMR	397	Bd1-1	Bd1	2896800	2897199	399	hypo	0.0124481	0.875289	0.872727	0.840909	0.956667	0.899351	0.929095	0.0224719	0.48583	0.585859	0.333333	0.175439	0.261261	0.331839	0.00545703	0.020979	0.0240137	0.003663	0.00311042	0.0285344	0.0253268
CGDMR	404	Bd1-1	Bd1	2919200	2919399	199	hypo	0.0833333	0.727273	0.870968	0.1	0.818182	0.44898	0.266667	0.0240964	0.0135135	0	0	0	0	0.0408163	0.00877193	0.00378788	0	0	0	0	0
CGDMR	405	Bd1-1	Bd1	2924200	2924399	199	hypo	0.031746	0.69697	1	0.461538	0.733333	0.631579	0.677419	0.00416667	0	0	0	0	0	0.00862069	0.00561798	0	0	0	0.0121951	0	0
CGDMR	409	Bd1-1	Bd1	2958700	2958899	199	hypo	0.0327869	0.793103	0.9375	0	0.851852	0.906542	0.957627	0	0.216667	0.5	0	0.769231	0.509615	0.627119	0	0.00502513	0.0231214	0	0.0277778	0.0248963	0.0609756
CGDMR	410	Bd1-1	Bd1	2974500	2974799	299	hyper	0.946667	0	0	0.6625	0.431818	0.782609	0.904762	0.0194805	0.00436681	0.0106383	0.00769231	0	0.0258621	0.0288066	0.00575374	0.015456	0.0235294	0.00383142	0	0.00945627	0.0028777
CGDMR	413	Bd1-1	Bd1	2977300	2977699	399	hyper	0.92562	0.0289855	0	0	0.666667	0.222222	0	0.0334347	0.00478469	0	0	0.0162602	0.00884956	0.00497512	0.0034188	0.0111266	0.0020284	0.00564972	0.00826446	0.00214133	0.00621118
CGDMR	414	Bd1-1	Bd1	2979500	2979799	299	hypo	0.0131579	0.931774	0.974249	0.974178	0.973469	0.941176	0.969199	0.00383142	0.73306	0.718593	0.795506	0.900826	0.722359	0.732759	0.0125714	0.0191257	0.0225806	0.0333056	0.0119474	0.0252226	0.0265487
CGDMR	420	Bd1-1	Bd1	3020100	3020999	899	hypo	0.0115207	0.960467	0.974775	0	0.973101	0.933518	0.0139373	0.0158014	0.648406	0.650407	0	0.649728	0.674256	0	0.00787402	0.0245951	0.0150754	0.00729927	0.0137931	0.0369713	0.00769231
CGDMR	421	Bd1-1	Bd1	3021100	3021999	899	hypo	0.002457	0.975078	0.968839	0	0.959906	0.977654	0.00343643	0.00984529	0.696023	0.74	0.0166667	0.661565	0.720057	0.0134831	0.00248293	0.00455235	0.0131119	0	0.0152009	0.010589	0.00394011
CGDMR	422	Bd1-1	Bd1	3024000	3024399	399	hyper	0.786207	0	0.0138889	0	0	0.970954	0.00995025	0.361277	0.0058651	0	0.0454545	0.0228571	0.778173	0.00687285	0.00848356	0	0.0209424	0.0147783	0	0.0221416	0.00547945
CGDMR	426	Bd1-1	Bd1	3038000	3038199	199	hypo	0.1	0.685714	1	0.8	0.213115	0.818182	0.5	0.0410959	0.0144928	0	0.0952381	0.0561798	0.0769231	0	0	0	0	0	0.00625	0	0.0285714
CGDMR	434	Bd1-1	Bd1	3078600	3078799	199	hyper	0.930636	0.176471	0	0.809524	0	0	0	0.0136986	0.0166667	0.00980392	0	0	0	0.00421941	0.00838926	0	0.0123457	0	0	0.00591716	0
CGDMR	443	Bd1-1	Bd1	3129900	3130599	699	hyper	0.959308	0.0108696	0.0104712	0.00701754	0.0176991	0.00592885	0.0032	0.422222	0.012	0.00763359	0.00268817	0.00509338	0.0206767	0.0160183	0.012505	0.0116487	0.00283286	0	0.00149925	0.00442478	0.0119376
CGDMR	444	Bd1-1	Bd1	3135100	3135899	799	hypo	0.0245727	0.963862	0.973412	0.975085	0.960987	0.963377	0.978305	0.041958	0.583762	0.664141	0.602294	0.556643	0.572165	0.711429	0.00234742	0.00597684	0.0076555	0.00909682	0.0105668	0.00908732	0.013787
CGDMR	446	Bd1-1	Bd1	3142100	3142299	199	hypo	0.0208333	0.714286	0.833333	0.45098	0.875	0.0588235	0.0888889	0.0333333	0.025974	0.0277778	0	0.0392157	0	0.0493827	0.00355872	0.00597015	0.0114286	0	0.00675676	0.0151515	0.00806452
CGDMR	450	Bd1-1	Bd1	3201200	3201499	299	hyper	0.860558	0.135922	0	0.953488	0.0140845	0.2125	0.125	0.86	0.0384615	0	0.496296	0.00826446	0.0421053	0	0.0149115	0.00900901	0.00444444	0.0100251	0.010989	0.0137741	0.00990099
CGDMR	453	Bd1-1	Bd1	3225000	3225699	699	hyper	0.960591	0.0121107	0.0231405	0.0160428	0.0160804	0.0235426	0.0102421	0.693309	0.0163666	0.0174419	0.00662252	0.0178218	0.0130152	0.00892857	0.0189805	0.0144472	0.0189944	0.0198777	0.00786713	0.00938967	0.0104312
CGDMR	462	Bd1-1	Bd1	3302300	3302799	499	hypo	0	0.571429	0.947761	0.344262	0.15873	0.112069	0.298643	0.00699301	0.28436	0.5	0.101449	0.0487805	0.0150943	0.111111	0.00204082	0.0444234	0.0263653	0.00613497	0.00666667	0.00688468	0.0241692
CGDMR	465	Bd1-1	Bd1	3323800	3323999	199	hypo	0.0854701	0.325	0.809524	0.857143	0.736364	0.597826	0.278351	0.0414201	0	0.046875	0	0.0523256	0.0243902	0.0147059	0.0294118	0	0	0	0.0135135	0.00746269	0.00333333
CGDMR	476	Bd1-1	Bd1	3358000	3358399	399	hyper	0.945525	0.0175439	0	0.125	0.0227273	0.05	0.0183486	0.637363	0	0	0	0	0	0.0265487	0.00416089	0.00833333	0.00833333	0	0.00803213	0	0.00890869
CGDMR	477	Bd1-1	Bd1	3375200	3375399	199	hypo	0.0384615	0	0.952381	1	0.95	0.588235	0.890411	0	0.285714	0.307692	NA	0.133333	0.05	0.351351	0	0	0.0192308	NA	0.0190476	0	0.00421941
CGDMR	492	Bd1-1	Bd1	3454600	3454799	199	hypo	0.0232558	0.958333	0.8	0.266667	1	0.785714	0.578947	0.01	0.0178571	0.0243902	0	0	0	0	0.015544	0	0	0	0	0	0.00636943
CGDMR	496	Bd1-1	Bd1	3466600	3466799	199	hyper	0.918519	0	0	0	0.935897	0.444444	0.959459	0.857143	0.0238095	0.028169	0.0285714	0.747475	0.52459	0.921162	0.0174419	0.00966184	0.0108696	0.0209059	0.00662252	0.0252708	0.0223368
CGDMR	497	Bd1-1	Bd1	3467000	3467399	399	hyper	0.93279	0.00361011	0	0	0.015748	0	0.938424	0.60334	0.0110701	0	0.0535714	0.00952381	0	0.699789	0.016983	0.00424628	0.0122449	0.00909091	0	0.0104712	0.0268817
CGDMR	498	Bd1-1	Bd1	3507300	3507599	299	hypo	0	0.810976	0.958333	NA	0.969231	0.932099	0.969543	0.0128205	0.666667	0.826087	NA	1	0.869159	0.924812	0.0137931	0.00823045	0.0432692	NA	0.00442478	0.0211268	0.00791139
CGDMR	499	Bd1-1	Bd1	3510800	3511699	899	hypo	0.0150215	0.976522	0.955959	0	0.966292	0.0117096	0.00932836	0.0362473	0.796064	0.869668	0.0236486	0.854839	0.0182768	0.023753	0.008	0.00686664	0.0139104	0.00594059	0.0100372	0.0063857	0.00593472
CGDMR	501	Bd1-1	Bd1	3522900	3523299	399	hyper	0.848649	0.662338	0	0.482759	0.155556	0.227273	0.494737	0.0486726	0	0	0	0.0416667	0.0306122	0	0.0231125	0.00790514	0	0.0181818	0	0.0132743	0.0208817
CGDMR	503	Bd1-1	Bd1	3569400	3569899	499	hypo	0.0144092	0.800789	0.937008	0.933735	0.939394	0.929293	0.944976	0.0115607	0.0151188	0.0337838	0	0.0141176	0.0103896	0.0153846	0.00260191	0.00866551	0.0110803	0.0058997	0.0115968	0.00853789	0.00746269
CGDMR	505	Bd1-1	Bd1	3586100	3586399	299	hyper	0.867347	0	0.0227273	0	0.05	0	0	0.0116279	0.0217391	0	0	0	0.0208333	0	0.00446429	0	0.013245	0	0	0	0.00530504
CGDMR	506	Bd1-1	Bd1	3587900	3589099	1199	hypo	0.0516637	0.961646	0.963822	0.972356	0.970419	0.963001	0.965106	0.0104712	0.654545	0.667149	0.684884	0.757835	0.700556	0.715158	0.00587607	0.00640586	0.0111583	0.0097706	0.0182073	0.00890262	0.022468
CGDMR	511	Bd1-1	Bd1	3649900	3650099	199	hypo	0	0.65	0.944444	0	0	0	0.555556	0	0	0	0	0	0	0	0.00347222	0.00440529	0.00549451	0	0	0.0117647	0
CGDMR	513	Bd1-1	Bd1	3655500	3655699	199	hyper	0.942149	0	0	0	0	0.261905	0.658537	0.0124777	0	0	0.0114286	0	0.00335571	0.00722022	0.0101138	0.0144578	0.0234375	0.00671141	0.00471698	0.00483092	0.007109
CGDMR	515	Bd1-1	Bd1	3673500	3673699	199	hypo	0.0294118	0.444444	0.836364	0	0.756757	0.457143	0.258065	0	0.186047	0.655172	0	0.53125	0.272727	0.0740741	0	0	0.0954774	0	0.14876	0.0430108	0
CGDMR	519	Bd1-1	Bd1	3704300	3704499	199	hypo	0.031746	0.361111	0.9	0.52	0.814815	0.684211	0.3	0.037037	0.369565	0.789474	0.538462	0.621212	0.464286	0.217391	0.0127119	0.2443	0.588235	0.563025	0.3	0.38206	0.276836
CGDMR	520	Bd1-1	Bd1	3706900	3707299	399	hypo	0.046729	0.824675	0.955752	0.833333	0.842105	0.940397	0.833333	0	0.138462	0.461538	0.0909091	0.0769231	0.215686	0.425532	0.0114286	0.042735	0.0255319	0.0266667	0.0258065	0.0153374	0.0244565
CGDMR	521	Bd1-1	Bd1	3707400	3707699	299	hyper	0.944615	0.00909091	0.0238095	0.00840336	0.0294118	0.0198676	0.018797	0.335878	0.00574713	0.0103093	0.0116279	0	0	0.0141844	0.0148423	0.00834492	0.00277778	0.00357143	0.0107066	0.0027933	0.0094518
CGDMR	522	Bd1-1	Bd1	3707800	3708399	599	hyper	0.97344	0.00869565	0.0233918	0.0102041	0.0120482	0.0193237	0.0135364	0.462617	0	0.0192308	0	0	0	0	0.00988142	0.0130178	0.00310559	0.0127389	0.00759013	0.0123153	0.00682927
CGDMR	530	Bd1-1	Bd1	3819800	3820099	299	hypo	0	0	0.947368	NA	0	0	0	0.0298507	0.0408163	0.222222	0	0	0	0.0731707	0	0.00689655	0.00421941	0	0.0212766	0.0227273	0.00584795
CGDMR	532	Bd1-1	Bd1	3820700	3821299	599	hypo	0	0.0526316	0.98	0.956522	0	0.0746269	0.115942	0.00943396	0	0.037037	0.307692	0	0.0147059	0.015625	0.00654665	0.00906344	0.005	0.00906344	0.010989	0.00534759	0.0178117
CGDMR	537	Bd1-1	Bd1	3886600	3886799	199	hypo	0.181818	0.6	1	NA	NA	NA	NA	0.125	0.6	0.571429	NA	NA	NA	NA	0.0217391	0	0	NA	NA	NA	NA
CGDMR	542	Bd1-1	Bd1	3939200	3939599	399	hyper	0.85098	0.902439	0	0	0	0.00746269	0.0196078	0.376404	0.45045	0	0	0.0181818	0.0125	0.00350877	0.0153218	0.00488998	0.00483092	0	0	0.00408163	0.00471698
CGDMR	544	Bd1-1	Bd1	3940200	3940599	399	hyper	0.930435	0.968326	0	0	0	0	0	0.478916	0.729216	0.00806452	0.00813008	0.00884956	0.00917431	0.011236	0.015748	0.00689655	0.00283286	0.0117302	0	0.00805153	0.00152439
CGDMR	548	Bd1-1	Bd1	3999600	4000199	599	hypo	0.0084507	0.944107	0.944162	0.0212766	0.00862069	0.011583	0.00236967	0.00801603	0.554675	0.649832	0.0353982	0	0.0137615	0.00332226	0.00444444	0.00507936	0.00858896	0.0248447	0.00900901	0.00413223	0.00256082
CGDMR	555	Bd1-1	Bd1	4037600	4037899	299	hyper	0.843137	0.25641	0	NA	0	0	0	0	0	0	NA	0	0	0	0	0.0121212	0	NA	0.0327869	0	0
CGDMR	556	Bd1-1	Bd1	4039300	4039499	199	hyper	0.90625	0.607143	0	0	0.225806	0.0952381	0.192308	0.0442478	0.0111111	0	0	0	0	0.0113636	0.00934579	0.00923787	0.004329	0.0183486	0	0	0.00229358
CGDMR	557	Bd1-1	Bd1	4041400	4042199	799	hypo	0.0484262	0.969372	0.985337	0.92812	0.964364	0.920983	0.976668	0.00714286	0.803122	0.820031	0.822414	0.837885	0.764463	0.838017	0.00991501	0.070612	0.0107914	0.0213904	0.0206343	0.0671031	0.0368703
CGDMR	567	Bd1-1	Bd1	4126000	4127299	1299	hyper	0.931577	0.0327662	0.0151869	0.00674536	0.0134146	0.0070609	0.864192	0.109146	0.0111111	0.0124113	0.0107527	0.011976	0.010989	0.0972489	0.00865801	0.00549666	0.00412088	0.0106045	0.0141176	0.00298686	0.00564972
CGDMR	568	Bd1-1	Bd1	4127400	4127599	199	hyper	0.95082	0	0.0416667	0	0.142857	0.0222222	0.1	0	0	0	0	0	0	0	0.00653595	0.00434783	0	0	0	0.0124481	0.00480769
CGDMR	572	Bd1-1	Bd1	4165400	4166099	699	hypo	0.00639659	0.966992	0.972628	0.976427	0.972945	0.974049	0.00543478	0.00692042	0.628726	0.601852	0.695652	0.561364	0.528274	0.00468019	0.011215	0.00711181	0.00643777	0.00849515	0.0127621	0.0184649	0.00581959
CGDMR	577	Bd1-1	Bd1	4249800	4250399	599	hyper	0.868132	0	0.00995025	0	0.0153846	0.0384615	0.0134771	0.455742	0.0168675	0.00985222	0.00769231	0.0154639	0.0127119	0.0117302	0.0110737	0.00213447	0	0.00943396	0.010118	0.0386555	0.00461894
CGDMR	578	Bd1-1	Bd1	4251300	4251899	599	hyper	0.91019	0.0366667	0.0194805	0.0446429	0	0.01	0.00802139	0.0082531	0.00253807	0	0.00740741	0.00429184	0.00862069	0.0105042	0.00644468	0.00566893	0.00595238	0.00234192	0.0049505	0.0218023	0.00527705
CGDMR	581	Bd1-1	Bd1	4269400	4269599	199	hypo	0	0	0.869565	0	0	0	0.444444	0	0	0.7	0	0	0.0769231	0.555556	0.0169492	0	0.0307692	0	0	0	0.0526316
CGDMR	585	Bd1-1	Bd1	4320100	4320599	499	hypo	0.0138067	0.572379	0.866883	0.709524	0.78337	0.0238727	0.0056338	0.00571429	0.185714	0.211538	0.274194	0.402778	0.00763359	0	0.0124434	0.0158996	0.0141956	0.0286807	0.0126316	0.0102564	0.00287356
CGDMR	586	Bd1-1	Bd1	4325300	4325499	199	hyper	0.958333	0	0	0	0	0.80531	0.943662	0.634615	0	0	0	0	0.342105	0.470588	0.038674	0	0	0	0	0.0642202	0.0680473
CGDMR	588	Bd1-1	Bd1	4333800	4333999	199	hypo	0	0.695652	0.860465	0.1	0.269231	0	0.0434783	0	0.0135135	0	0	0	0.0052356	0	0.0126183	0.00390625	0.0160428	0	0.025974	0.00248756	0.00338983
CGDMR	613	Bd1-1	Bd1	4453000	4453199	199	hypo	0	0.0224719	0.887097	0	0	0	0.0298507	0.0192308	0.00862069	0.432432	0	0	0.025641	0	0.0215311	0.00684931	0.0511628	0	0	0	0
CGDMR	623	Bd1-1	Bd1	4500700	4501499	799	hypo	0.0142857	0.965235	0.975089	0.982592	0.973958	0.0467836	0.985294	0.008	0.597222	0.74026	0.657233	0.685279	0	0.732342	0.00837521	0.00874636	0.0125714	0.023126	0.0230415	0.00506329	0.0159119
CGDMR	624	Bd1-1	Bd1	4509800	4510299	499	hyper	0.91129	0.95893	0.010453	0.00819672	0	0.00198807	0.874684	0.207547	0.309179	0.00473934	0.0185185	0.0318841	0.0227273	0.261329	0.00890208	0.0070035	0.00211864	0.00496689	0.0170279	0.00603622	0.0213025
CGDMR	626	Bd1-1	Bd1	4512200	4512399	199	hypo	0.0869565	0.666667	0.941748	1	0.966216	0.846939	0.960265	0.0240964	0.149425	0.78022	0.896552	0.1125	0.136986	0.42963	0	0.00638978	0.028754	0	0.00672646	0.0112676	0.0114286
CGDMR	629	Bd1-1	Bd1	4521000	4521199	199	hypo	0	0	0.777778	0.7	1	0.705882	0	0	0	0.0714286	0	0.266667	0.214286	0	0.00843882	0.00884956	0.0104167	0	0.0181818	0.045045	0.00746269
CGDMR	636	Bd1-1	Bd1	4581200	4581399	199	hypo	0	0.769231	1	NA	0.775	0.71875	1	0	0.111111	0.1875	NA	0.483333	0.354167	0.857143	0	0	0	NA	0	0	0.0606061
CGDMR	639	Bd1-1	Bd1	4590800	4591299	499	hypo	0.0196078	0.901747	0.956522	0.895044	0.891489	0.9279	0.946154	0.0110497	0.572193	0.747748	0.632653	0.602804	0.678392	0.717949	0.0107527	0.0338778	0.022412	0.0452489	0.0274203	0.0379225	0.036352
CGDMR	641	Bd1-1	Bd1	4607700	4608399	699	hypo	0.0160142	0.0103481	0.938195	0.019802	0.00387097	0.0136571	0.00707547	0.0109546	0.0126382	0.441118	0.00558659	0	0.0306407	0.0122449	0.00730689	0.00369393	0.0101215	0.00371057	0.00709779	0.00741427	0.00606469
CGDMR	649	Bd1-1	Bd1	4654200	4654399	199	hyper	0.953488	0	0	NA	0	0.803279	0.25	0.614458	0	0	NA	NA	0.102041	0	0.0146341	0	0	NA	0	0.0115163	0
CGDMR	650	Bd1-1	Bd1	4655000	4655299	299	hyper	0.945148	0	0.0425532	0	0	0.983402	0	0.541254	0	0.0204082	0	0.1	0.888889	0.0263158	0.0090009	0.00534759	0.0231214	0.0142857	0	0.0149701	0.00520833
CGDMR	652	Bd1-1	Bd1	4663300	4663599	299	hypo	0.016835	0.818182	0.994382	0.733333	0.958115	0.87069	0.843243	0.0194175	0.0550459	0.084507	0	0.5	0.0151515	0.310345	0.00621118	0.0154867	0.015625	0	0.0111111	0	0
CGDMR	653	Bd1-1	Bd1	4664900	4665399	499	hypo	0.0101781	0.937838	0.972678	0.937984	0.981818	0.00591716	0.0087146	0.014881	0.184669	0.148936	0.333333	0.443515	0.013245	0.003367	0.015233	0.0129252	0.0175439	0.00518135	0.0257475	0.0167715	0.0135993
CGDMR	655	Bd1-1	Bd1	4674100	4674299	199	hypo	0	0.942029	0.968254	0	0	0.929577	0	0	0.564103	0.785714	0	0	0.769231	0	0	0.0472103	0.00763359	0.0769231	0	0.102941	0.0208333
CGDMR	656	Bd1-1	Bd1	4674400	4674599	199	hypo	0	0.402439	0.884058	NA	0	0.745562	0.0217391	0.0176991	0.472727	0.490196	NA	0	0.543103	0.0277778	0.00218818	0.414634	0.258065	NA	0	0.203837	0.0131579
CGDMR	659	Bd1-1	Bd1	4716000	4716499	499	hyper	0.951737	0.575758	0.00271003	0.571429	0.583333	0.00979192	0.53125	0.466192	0.321429	0	0.2	0.375	0.00497512	0.3	0.0152091	0	0	0.0454545	0.0740741	0.0026738	0.0131579
CGDMR	660	Bd1-1	Bd1	4716700	4717299	599	hypo	0	0	0.965174	0.0190476	0.00990099	0.916667	0.0416667	0.0112782	0.0136054	0.58	0	0.0169492	0.452145	0	0.00929368	0.0058309	0.0165975	0.00689655	0.00591716	0.0149254	0.008726
CGDMR	661	Bd1-1	Bd1	4723500	4723799	299	hypo	0	0	0.970149	0	0.0545455	0.78135	0.0275229	0.0117647	0.0188679	0.410526	0	0.0403226	0.554187	0.008	0.0192719	0.00347222	0.0140845	0.0348837	0.0185874	0.108673	0.00649351
CGDMR	662	Bd1-1	Bd1	4724300	4724499	199	hypo	0	0.75	1	NA	NA	0	0	0	0	0.407407	NA	NA	0	0	0.00877193	0.0357143	0	NA	NA	0	0
CGDMR	664	Bd1-1	Bd1	4740100	4740899	799	hypo	0.0203193	0.917241	0.976982	0.985294	0.943787	0.973051	0.962343	0.0143084	0.642478	0.789326	0.572165	0.610487	0.827815	0.716934	0.011807	0.0271575	0.0125899	0.0265957	0.0194384	0.10497	0.0157374
CGDMR	665	Bd1-1	Bd1	4752000	4752399	399	hypo	0.0164474	0.00606061	1	0	0	0.736842	0	0.0385965	0.00568182	0.189189	0	0	0.0869565	0	0.0134228	0.00306749	0.00377358	0	0.0191083	0	0
CGDMR	666	Bd1-1	Bd1	4752500	4752899	399	hypo	0	0	0.987261	0	0.00448431	0.953757	0.00961539	0.0334928	0.00714286	0.572581	0	0	0.565891	0.012987	0.00698487	0.00359066	0.00691244	0.00749064	0.00884956	0.0161692	0.00167785
CGDMR	667	Bd1-1	Bd1	4764200	4764499	299	hypo	0	0.0288462	0.952381	0	0.147059	0.277372	0.0151515	0.0122699	0	0.376623	0	0	0.0141844	0	0.00462963	0	0.016835	0	0	0.00406504	0
CGDMR	668	Bd1-1	Bd1	4764600	4764799	199	hypo	0	0.181818	0.928571	NA	0	0	0	0	0	0	NA	0	0	0	0	0	0	NA	0.0555556	0.025	0
CGDMR	669	Bd1-1	Bd1	4765700	4766499	799	hypo	0.0182584	0.799496	0.952719	0.78905	0.792781	0.826923	0.851552	0.0171569	0.211581	0.13834	0.18	0.204023	0.145	0.248082	0.0126582	0.00773395	0.00596659	0.00686813	0.019833	0.00750187	0.00846024
CGDMR	671	Bd1-1	Bd1	4769200	4769699	499	hypo	0.0049505	0.921844	0.990172	0.969112	0.90942	0.884718	0.843271	0.00238095	0.524096	0.576754	0.686335	0.552448	0.466491	0.219472	0.00108932	0.0107112	0.00944386	0.00596659	0.0084088	0.0113095	0.00628492
CGDMR	673	Bd1-1	Bd1	4774000	4774399	399	hyper	0.934028	0	0.0909091	0.119266	0	0.772926	0.00943396	0.0220441	0.00490196	0.0121951	0	0.00793651	0.0240964	0.0147059	0.0100402	0.00585938	0.00677201	0	0	0.00987654	0.00763359
CGDMR	681	Bd1-1	Bd1	4801600	4802399	799	hypo	0.0626118	0.637363	0.984144	0.744493	0.759328	0.971755	0.702811	0.0235721	0.489583	0.623963	0.333333	0.3072	0.338298	0.276896	0.0279188	0.0120361	0.0102564	0.00699301	0.00704225	0.00786222	0.0168878
CGDMR	684	Bd1-1	Bd1	4825700	4826199	499	hypo	0.0162602	0.00515464	0.933333	0	0.718894	0.956912	0.00320513	0.0187166	0.00344828	0.381215	0.03125	0.078125	0.529268	0.0128205	0.009	0.00654665	0.00764818	0	0.00931677	0.0108696	0.00340715
CGDMR	702	Bd1-1	Bd1	5096800	5097199	399	hypo	0.00408163	0.897328	0.916667	0.958696	0.913274	0.813131	0.914286	0.0102041	0.6	0.43318	0.632353	0.530387	0.4	0.450777	0.00761905	0.0467551	0.0700637	0.112844	0.0819001	0.0421836	0.0819672
CGDMR	706	Bd1-1	Bd1	5131900	5132099	199	hypo	0	0	0.866667	0	NA	0	0	0	0	0.0285714	0.0178571	0	0	0	0.00550964	0.00694444	0.00970874	0	0	0	0
CGDMR	707	Bd1-1	Bd1	5136400	5136599	199	hyper	0.819549	0	0	0	0.0769231	0	0	0.405405	0	0	0	0	0	0	0.0104167	0	0.0344828	0.0133333	0	0	0.0273973
CGDMR	712	Bd1-1	Bd1	5169300	5169599	299	hyper	0.86413	0.00638298	0.00699301	0.0232558	0.004329	0.988827	0.940984	0.376812	0.00943396	0.0288462	0.0740741	0.0566038	0.756458	0.789598	0.0119956	0.0037037	0.0113208	0	0.0102564	0.0125	0.0156863
CGDMR	715	Bd1-1	Bd1	5173000	5173199	199	hypo	0	0.585106	1	0	1	0	0	0.0285714	0.027027	0.733333	0	0.481481	0	0	0	0.00699301	0	0	0.00900901	0	0
CGDMR	722	Bd1-1	Bd1	5210300	5211999	1699	hyper	0.948242	0.104108	0.0145631	0.960032	0.0133983	0.944367	0.956599	0.660888	0.0778923	0.0058651	0.631214	0.00879121	0.737752	0.766197	0.0175967	0.0337274	0.00862896	0.0121654	0.00353982	0.0233933	0.0171149
CGDMR	724	Bd1-1	Bd1	5270400	5270599	199	hypo	0.0147059	0.842105	0.902439	0.259259	0.789474	0.90625	0.0227273	0.030303	0.176471	0.466667	0.0769231	0.166667	0.2	0.0625	0.0169492	0.0232558	0.00847458	0.0229885	0	0.00833333	0.0388889
CGDMR	727	Bd1-1	Bd1	5298400	5298599	199	hypo	0.0666667	1	1	1	1	0.6	0.913043	0.0307692	0.420455	0.162162	0	0.285714	0.0673077	0.0933333	0.0261097	0.00655022	0	0	0.0144928	0	0.00995025
CGDMR	734	Bd1-1	Bd1	5382100	5382299	199	hypo	0	0.533333	0.916667	0.68	0.0769231	0.4	0.947368	0	0.25	0.4	0.222222	0	0.269231	0.483871	0	0.0181818	0.110236	0.0610687	0	0.00641026	0.0273438
CGDMR	738	Bd1-1	Bd1	5402200	5402599	399	hypo	0	0	1	0	0	0	0	0	0	0.814815	0.025	0	0	0	0.00305344	0.0128205	0.0528771	0	0.0413534	0.0103093	0
CGDMR	739	Bd1-1	Bd1	5402800	5403099	299	hypo	0	0	0.978723	0	0	0	0	0.0204082	0	0.905512	0	0	0	0	0.0229008	0	0.00573066	0	0	0	0
CGDMR	744	Bd1-1	Bd1	5407800	5407999	199	hyper	0.962963	1	0	NA	0	1	0.794872	0	0.0357143	0	0	0	0.0454545	0	0	0.0122699	0	0	0.0232558	0.0344828	0.0194175
CGDMR	745	Bd1-1	Bd1	5408700	5408899	199	hyper	0.96	1	0	1	NA	0.958333	0.875	0.0191388	0.0188679	0.0212766	0	NA	0	0.00877193	0.00289017	0.005	0.0148148	0	NA	0	0.00471698
CGDMR	748	Bd1-1	Bd1	5423200	5423399	199	hypo	0.0294118	0.706215	0.936842	0.037037	0.0238095	0.021164	0.0340909	0.00613497	0.117647	0.0694444	0.0869565	0	0.0425532	0.0857143	0.00212766	0.0021322	0.0104895	0.00925926	0	0	0.00507614
CGDMR	753	Bd1-1	Bd1	5446700	5446999	299	hyper	0.88102	0.897019	0.0152672	0.994975	0	0.930649	0.930052	0.478548	0.339844	0.0152672	0.603896	0	0.589595	0.537162	0.0108225	0.00609756	0	0.0263158	0.0133333	0.00882029	0.0023753
CGDMR	763	Bd1-1	Bd1	5526300	5526799	499	hyper	0.93674	0.00654129	0.0041841	0.0027894	0.00991885	0.0157767	0.0253061	0.397436	0.00304878	0.0070922	0.00506329	0.00656814	0.00222222	0.0161054	0.0129241	0.045836	0.0600559	0.010296	0.0299914	0.0328738	0.0284939
CGDMR	778	Bd1-1	Bd1	5662800	5662999	199	hypo	0.0104167	1	0.958333	0.875	0.882353	0.8125	0.0512821	0.0144928	0.0666667	0.047619	0	0	0	0	0.0106667	0.00704225	0	0.0402685	0.0588235	0.024	0.0264901
CGDMR	781	Bd1-1	Bd1	5675500	5676099	599	hyper	0.928369	0.00391389	0.0041841	0	0.0178571	0.00515464	0.0169972	0.664024	0.00872093	0.0206186	0.010989	0.00434783	0.00696864	0.028777	0.0117201	0.00633413	0.00875657	0.00645161	0.0128755	0.00525762	0.0034642
CGDMR	787	Bd1-1	Bd1	5700600	5701099	499	hypo	0.00990099	0.965714	0.944828	0.918367	0.907407	0.897959	0.792553	0.019337	0.00623053	0.0100503	0	0.05	0.00465116	0.00779221	0.0124378	0.00985222	0.0112613	0	0	0.00636943	0.0144509
CGDMR	788	Bd1-1	Bd1	5702800	5702999	199	hypo	0.0285714	0.945946	0.941176	1	1	0.9	0.977273	0.0243902	0.032967	0	0	0	0	0	0.00743494	0	0	0	0.0140845	0	0.00664452
CGDMR	789	Bd1-1	Bd1	5704000	5704599	599	hyper	0.946771	0.0146067	0.00361011	0.016092	0.00135135	0.00997783	0.00430107	0.567385	0.0021097	0	0	0.0163934	0.0125261	0.0141176	0.0123839	0.0113402	0.00911854	0.0122699	0.0188133	0.0109409	0.00376884
CGDMR	790	Bd1-1	Bd1	5704700	5705099	399	hyper	0.932384	0.0526316	0	0.285714	0	0.0555556	0.0238095	0.415233	0.0271739	0	NA	0	0.0121951	0	0.00720906	0.00714286	0	NA	0	0.030303	0.0113208
CGDMR	791	Bd1-1	Bd1	5716500	5716699	199	hypo	0.0171429	0.0234375	0.806122	0	0.0714286	0.0163934	0.684848	0.0121951	0	0.365854	0	0.0285714	0.0217391	0.273684	0.00622407	0	0.0604651	0	0.0314961	0.00324675	0.0117371
CGDMR	798	Bd1-1	Bd1	5758600	5758799	199	hypo	0	0	0.842105	NA	0.111111	0.0333333	0.0909091	0	0	0.206897	NA	0	0	0	0.00342466	0.00434783	0.0377358	NA	0	0.00515464	0.1
CGDMR	799	Bd1-1	Bd1	5760500	5760699	199	hyper	0.933333	0.00389105	0.0246305	0	0	0.00411523	0	0.388889	0	0.0206186	0	0	0.00909091	0	0.00540541	0	0	0.0144928	0	0	0.0138889
CGDMR	802	Bd1-1	Bd1	5779000	5779199	199	hypo	0	0.72	0.966667	1	0.65	0.851064	0.916667	0	0.36	1	0.8	NA	0.536585	0.875	0.017301	0.00668896	0.00930233	0.0639535	0.0169492	0.0555556	0.0790514
CGDMR	803	Bd1-1	Bd1	5789400	5790099	699	hyper	0.960312	0.0092355	0.00842105	0.0239808	0.0243754	0.0416412	0.0301783	0.773732	0.0145396	0.00722022	0.0155039	0.0114566	0.0679612	0.0449438	0.0584752	0.00175747	0.00857143	0.0217391	0.00235849	0.0147541	0.0171569
CGDMR	805	Bd1-1	Bd1	5808500	5809299	799	hypo	0.00561798	0.887967	0.964286	0.946429	0.962039	0.947982	0.945681	0.0103093	0.521739	0.651852	0.646667	0.659306	0.736211	0.696589	0.00551378	0.0126034	0.0268166	0.0367647	0.0130797	0.0320557	0.0227273
CGDMR	821	Bd1-1	Bd1	5885000	5885299	299	hypo	0.048951	0.972789	1	0.985507	0.864865	0.970833	0.99537	0	0.714286	0.8	0.415094	0.4	0.606218	0.457317	0.00223714	0.00968523	0	0.00469484	0.010989	0.00651466	0.00881834
CGDMR	829	Bd1-1	Bd1	5969900	5970499	599	hypo	0.00740741	0.977745	0.991803	0.977419	0.979203	0.97417	0.970545	0.0113379	0.838557	0.876712	0.862385	0.884655	0.836016	0.824066	0.00724638	0.0124955	0.0166341	0.00462963	0.0144617	0.00865052	0.0100193
CGDMR	831	Bd1-1	Bd1	5972700	5972899	199	hypo	0.0724638	0.97619	0.983333	1	1	0.969582	0.977578	0	0.694444	0.627451	0	0.625	0.693069	0.584416	0.0277778	0.0148368	0.0225225	0.0434783	0.00666667	0.00665188	0.00227273
CGDMR	836	Bd1-1	Bd1	6004400	6004599	199	hypo	0	1	1	0.25	0	0.777778	0.125	0.0625	0.818182	0.625	0	0	0.428571	0.181818	0.003861	0.0153061	0.0126582	0	0	0	0
CGDMR	838	Bd1-1	Bd1	6010000	6010699	699	hypo	0.0110974	0.965269	0.98482	0.967105	0.981801	0.957051	0.971765	0.0106101	0.733699	0.786667	0.784946	0.78169	0.741007	0.765945	0.00762195	0.0200893	0.0231884	0.013373	0.0266075	0.0318182	0.0248681
CGDMR	844	Bd1-1	Bd1	6054700	6054999	299	hyper	0.898148	0.00740741	0.0153846	0	0	0.0102041	0	0.5625	0.0357143	0	0	0	0	0.0227273	0.0116414	0.00982318	0.00442478	0.017094	0.00813008	0	0.00383877
CGDMR	850	Bd1-1	Bd1	6077000	6077199	199	hypo	0	0	0.777778	1	0	1	0	0	0	0.384615	0	0	NA	NA	0.0133333	0.00757576	0.00613497	0	0	0	0
CGDMR	855	Bd1-1	Bd1	6124000	6124399	399	hypo	0.020202	0.0153846	0.966184	0.900463	0.935045	0.955766	0.016	0.0769231	0	0.706349	0.663462	0.71504	0.708134	0	0.00617284	0	0	0.0190114	0.0275591	0.128916	0
CGDMR	867	Bd1-1	Bd1	6243300	6243899	599	hyper	0.963082	NA	0.00581395	0.914286	0	0.977685	NA	0.52474	NA	0.0133929	0.709052	0.0193237	0.826738	NA	0.0121511	0	0.00241546	0.008521	0.00694444	0.00963126	0
CGDMR	871	Bd1-1	Bd1	6272900	6273199	299	hypo	0	1	0.823529	0	0	0.0625	0.814815	0.0120482	0.77907	0.904762	0	1	0.0384615	0.818182	0.0137931	0.0139276	0.00826446	0	0	0.0102041	0.00618557
CGDMR	874	Bd1-1	Bd1	6280500	6280699	199	hyper	0.962963	0	0	0	0	0	0	0.203125	0	0	0	0	0	0	0.0168919	0	0	0	0	0	0.00591716
CGDMR	875	Bd1-1	Bd1	6285800	6286099	299	hypo	0.0943396	0.162162	0.930556	0.934959	0.896	0.893443	0.292683	0.0615385	0.102564	0.428571	0.424242	0.555556	0.377551	0.204545	0.00655738	0.00714286	0.035461	0.0260664	0.00646552	0.0131868	0.0155763
CGDMR	879	Bd1-1	Bd1	6330200	6330399	199	hyper	0.903226	0.122222	0.0588235	0	0	0.269841	0.704082	0.0172414	0.0263158	0	0	0	0.0121951	0	0.00941177	0.0108696	0	0	0	0.0123967	0.0084507
CGDMR	894	Bd1-1	Bd1	6451400	6451599	199	hypo	0.013986	0.906404	0.9375	0	0.882353	0.251852	0.857955	0.00487805	0.0168067	0	0	0	0.00434783	0.00325733	0.00481928	0.0113636	0.0131579	0.0352113	0.00899281	0.0116009	0.0165289
CGDMR	899	Bd1-1	Bd1	6475500	6476399	899	hypo	0.0163711	0.0242915	0.979028	0.966365	0.958475	0.94964	0.00431965	0.0260274	0.0112867	0.535514	0.554361	0.5568	0.551598	0.00265957	0.0118953	0.00111857	0.0170898	0.0110104	0.0144404	0.0192576	0.00716846
CGDMR	900	Bd1-1	Bd1	6476500	6477099	599	hypo	0.0037594	0.118321	0.982036	0.932886	0.986842	0.969529	0	0.00858369	0.039604	0.591304	0.571429	0.661088	0.461806	0.0223881	0.0163399	0.00433369	0.0209974	0.0057971	0.0134003	0.0146789	0.00505051
CGDMR	909	Bd1-1	Bd1	6534600	6534899	299	hypo	0	0	0.884058	0.934783	0.95	0.962687	0.0408163	0	0	0.692308	1	0.8	0.72	0	0.00729927	0.0493827	0.166667	0.2	0.175732	0.0894569	0.0357143
CGDMR	931	Bd1-1	Bd1	6732000	6732299	299	hypo	0	0.0322581	0.925926	0	0	0.105263	0	0.0263158	0.0434783	0.48	0	0	0	0	0.012766	0	0.0243902	0	0.0526316	0.00819672	0
CGDMR	933	Bd1-1	Bd1	6739000	6739199	199	hypo	0	0.943396	1	1	0.958333	0.786885	0.5	0.0181818	0.0135135	0	0.0540541	0	0.015625	0	0.00641848	0.010101	0.00615385	0	0	0.00849257	0.0042735
CGDMR	934	Bd1-1	Bd1	6748100	6748499	399	hyper	0.973378	0.0168539	0.0187793	0.0797101	0.0566038	0.088015	0.0118846	0.662252	0.0239521	0.030303	0.0846154	0.0940171	0.167364	0.00766283	0.0708333	0.0123457	0	0.0306748	0.00404858	0.00982801	0
CGDMR	938	Bd1-1	Bd1	6805300	6805699	399	hypo	0.0693642	0.945489	0.975	0.975758	0.952239	0.0766667	0.967521	0.0714286	0.39697	0.551724	0.44	0.525692	0.0186916	0.555819	0.025641	0.0153257	0.00505051	0.0078125	0.034965	0.00966184	0.00856164
CGDMR	939	Bd1-1	Bd1	6806800	6807299	499	hyper	0.939945	0.00700701	0.00242131	0	0.00517241	0.978625	0.0091638	0.361222	0.0163205	0.0078125	0.0291262	0.0160858	0.634589	0.00735294	0.0164204	0.00821018	0.00408163	0.00595238	0.0193705	0.00987433	0.00511771
CGDMR	946	Bd1-1	Bd1	6896500	6896699	199	hyper	0.933333	0	0	0.714286	0	0.538462	0	NA	0.333333	0	NA	NA	NA	0	0.0107527	0	0	0	0	0.0121951	0
CGDMR	947	Bd1-1	Bd1	6900100	6900699	599	hypo	0.00403226	0.921296	0.932039	0.96	0.943894	0	0	0.0216718	0.678487	0.728261	0.817352	0.769841	0.0104712	0.021645	0.00771605	0.0167984	0.0141844	0.012	0.0119681	0.0136519	0
CGDMR	955	Bd1-1	Bd1	6973600	6973799	199	hyper	0.969027	0.970149	0	0.987406	0.968661	0.97541	0.967153	0.698718	0.784314	0	0.76699	0.395062	0.764706	0.726667	0.00361664	0.00813008	0	0.00790514	0	0.0211268	0.016632
CGDMR	956	Bd1-1	Bd1	6974000	6974299	299	hyper	0.896414	0.869718	0	0.973684	0	0.900498	0.909804	0.551546	0.613419	0.0149254	0.671587	0	0.654412	0.702454	0.0513479	0.0535714	0.00471698	0.0557621	0.00884956	0.00725689	0.0368295
CGDMR	960	Bd1-1	Bd1	7031500	7031999	499	hypo	0.0107066	0.185442	0.978852	0.966019	0.0538793	0.0327198	0.0515873	0.0188172	0.0717213	0.794964	0.618577	0.0740741	0.0456853	0.0541872	0.00763359	0.106332	0.00488759	0.0315113	0.137634	0.0793522	0.115672
CGDMR	961	Bd1-1	Bd1	7032400	7032599	199	hypo	0.124088	0.945087	1	0	0.391304	0.971963	0.979866	0.0559441	0.29	0.785714	0	0	0.631579	0.407895	0.0111607	0.00173611	0.0217391	0	0.0188679	0.00443459	0.00809717
CGDMR	962	Bd1-1	Bd1	7037100	7038099	999	hyper	0.957293	0.0178344	0.00623053	0.98929	0.0109649	0.0114778	0.0154739	0.354567	0.0168634	0.0229358	0.552846	0.0148699	0.0163934	0.016129	0.0165289	0.00425985	0.0144628	0.00850547	0.00689655	0.016129	0.00853242
CGDMR	963	Bd1-1	Bd1	7040500	7040699	199	hyper	0.966667	0	0	NA	0	0	0	0.333333	0	0	NA	0.166667	0	0	0	0.00552486	0.0117647	NA	0	0	0
CGDMR	968	Bd1-1	Bd1	7078700	7078999	299	hypo	0	0.968182	0.977778	0.983607	0.95082	0.977528	0.936255	0.010929	0.486486	0.509804	0.542857	0.516129	0.433962	0.582857	0.025641	0.0077821	0	0.00884956	0.00425532	0.0244565	0.00469484
CGDMR	969	Bd1-1	Bd1	7079400	7079599	199	hypo	0	0.738462	1	1	0.731707	0.970588	1	0.0277778	0.309859	0.893333	0.941176	0.795455	0.723404	0.677419	0.00245098	0.00824176	0.0134409	0.0198676	0.021978	0.0136986	0.00632911
CGDMR	972	Bd1-1	Bd1	7080500	7080699	199	hypo	0.0357143	0.973333	0.941176	0	1	1	0.978261	0	0.618321	0.71875	0	0	0.71875	0.717391	0	0.0164384	0.0412371	0	0	0	0
CGDMR	973	Bd1-1	Bd1	7080800	7081199	399	hypo	0.00510204	0.996942	0.975248	0.977011	0.991561	0.988558	0.973558	0.026738	0.69419	0.810345	0.932203	0.85209	0.845511	0.872642	0.00954654	0.00540958	0.00728155	0.0123153	0.0126921	0.00965018	0.00685786
CGDMR	974	Bd1-1	Bd1	7082600	7082999	399	hypo	0.0217391	0.979592	0.985816	0.960784	0.946667	0.931034	0.964912	0	0.810403	0.782313	0.826389	0.913043	0.830065	0.868376	0.00302115	0.0072904	0.00481928	0.0100503	0.0058997	0.0101325	0.0104103
CGDMR	975	Bd1-1	Bd1	7083300	7083699	399	hypo	0.0243902	0.941406	0.981132	1	0.972973	0.968504	0.971302	0.00487805	0.880503	0.875	0.895652	0.818182	0.898608	0.855942	0.0103627	0.00620155	0.00868307	0.0221519	0.00917431	0.00977995	0.00832948
CGDMR	976	Bd1-1	Bd1	7083800	7084199	399	hypo	0.00917431	0.979757	0.970874	0.97973	0.957447	0.980545	0.991354	0.019802	0.815603	0.897638	0.80791	0.841837	0.866426	0.841558	0.00714286	0.00600601	0.0163636	0	0.00878294	0.0101196	0.0108992
CGDMR	977	Bd1-1	Bd1	7084400	7084799	399	hypo	0.010101	0.930693	0.976744	1	0.928571	0.944954	0.984848	0.00609756	0.837398	0.62963	0.777778	0.220183	0.809859	0.829545	0	0.0120482	0.00518135	0.025641	0.00411523	0.017284	0.0149254
CGDMR	978	Bd1-1	Bd1	7085500	7085699	199	hypo	0.0118343	0.972881	0.994413	0.990385	0.820896	0.98892	0.966667	0.019802	0.54321	0.674074	0.259259	0.0412371	0.682927	0.590517	0	0.0128617	0.0092081	0.0092081	0	0.0195503	0.0169062
CGDMR	979	Bd1-1	Bd1	7104200	7104699	499	hypo	0.00864553	0.935725	0.974194	0.9683	0.978349	0.965706	0.962552	0.0165289	0.651769	0.762452	0.750789	0.701587	0.754967	0.768371	0.00321888	0.0143198	0.0154867	0.0177638	0.00915663	0.0170987	0.0204373
CGDMR	983	Bd1-1	Bd1	7148300	7148599	299	hyper	0.966667	0.328358	0	0	0.943662	0.839161	0.434211	0	0.0133333	0	0	0.0322581	0.00862069	0.0113636	0.00215054	0	0	0.05	0.0042735	0.00888889	0.00321543
CGDMR	984	Bd1-1	Bd1	7149100	7149499	399	hyper	0.831818	0.00706714	0.0164835	0.0181269	0.00478469	0.00932401	0.00262812	0.0300633	0.0164425	0.013289	0.0251046	0.003125	0.0149254	0.0102389	0.013306	0.0051975	0.0266272	0.0101351	0.00776699	0	0.00753769
CGDMR	986	Bd1-1	Bd1	7155300	7155499	199	hypo	0.0526316	0	0.933333	0	0	0.833333	0.0645161	0	0	0	0	0	0	0	0	0	0	0.0434783	0	0	0
CGDMR	991	Bd1-1	Bd1	7175300	7175499	199	hyper	0.916667	0	0	1	0	0.844828	0.829787	0	0	0	NA	0	0.037037	0	0	0	0	0	0	0	0
CGDMR	997	Bd1-1	Bd1	7213700	7214199	499	hyper	0.957245	0.0152284	0.0228571	0.0108696	0.0164835	0.0083682	0.0148588	0.426866	0.00934579	0	0.0263158	0.0192308	0.0187793	0.00738007	0.00900225	0.00522648	0.0136187	0.00421941	0.00207039	0.00733138	0.0048216
CGDMR	1001	Bd1-1	Bd1	7257100	7257299	199	hyper	0.758621	0.166667	0	0	0	0	0.588235	0.0263158	0	0	0	0	0	0	0.00273224	0	0.00636943	0	0.012987	0.0157068	0
CGDMR	1010	Bd1-1	Bd1	7314500	7315299	799	hypo	0.017094	0.979232	0.990283	0.980933	0.970746	0.966552	0.973586	0.0261067	0.797245	0.789926	0.860164	0.83286	0.777572	0.843192	0.0157031	0.012761	0.011106	0.0137171	0.0158451	0.00999737	0.0124581
CGDMR	1011	Bd1-1	Bd1	7315400	7315599	199	hypo	0	0.742424	0.971831	0.876923	0.960784	0.705882	0.940476	0.135593	0.310345	0.810811	0.542857	0.333333	0.434783	0.708333	0.00873362	0.00980392	0.008	0	0	0	0.0052356
CGDMR	1012	Bd1-1	Bd1	7316000	7316199	199	hypo	0.0208333	0	0.93617	0.894737	0	0	0	0	0.0666667	0.75	0.25	0	0	0	0	0.08	0.0576923	0	0	0	0
CGDMR	1013	Bd1-1	Bd1	7316700	7316999	299	hypo	0.0222222	0.902439	0.980392	0.846154	0.93617	0.88	0.905983	0.013245	0.545455	0.625	0.705882	0.857143	0.646259	0.715084	0.022409	0.2287	0.0755556	0.289855	0.109375	0.087766	0.112319
CGDMR	1014	Bd1-1	Bd1	7317800	7318099	299	hyper	0.895735	0	0.0126582	0.0204082	0	0.0333333	0.00714286	0.588076	0	0	0.0666667	0.04	0.0183486	0	0.0675966	0.00409836	0.00806452	0.0185185	0.0097561	0	0.0213904
CGDMR	1017	Bd1-1	Bd1	7328200	7328899	699	hyper	0.97428	0.00953516	0.0064	0.983649	0.00767085	0.0120101	0.00544555	0.698324	0.0304	0.0421941	0.731132	0.0126354	0.0489731	0.0332512	0.0225564	0.00949914	0.0211268	0.00857843	0.0148515	0.0193286	0.0107373
CGDMR	1018	Bd1-1	Bd1	7343900	7344199	299	hypo	0.0227273	0.347826	0.973684	1	0	1	0.961538	0.00900901	0.0322581	0.804878	0.730539	0.0185185	0.2	0.812155	0.0410959	0.0366972	0.0212766	0.0184049	0	0.00735294	0.0197628
CGDMR	1019	Bd1-1	Bd1	7344400	7344599	199	hypo	0	0.985294	0.958333	1	0	1	0.846154	0	0.541985	0.717391	0.619048	0	0.734375	0.639344	0.0135593	0.0299501	0.0133333	0.024	0.0117647	0.0177936	0.0105541
CGDMR	1026	Bd1-1	Bd1	7394800	7395499	699	hypo	0.018315	0.883399	0.985075	0	0	0.918489	0.911058	0.0262467	0.541997	0.631579	0	0.0240964	0.427935	0.642857	0.0246548	0.0130378	0.00820793	0.0138889	0	0.00788436	0.0130246
CGDMR	1028	Bd1-1	Bd1	7420100	7420399	299	hypo	0	0.0277778	0.987654	0.12	0.111111	0	0.0789474	0.0416667	0	0.587719	0	0.030303	0.025	0.0144928	0.00789474	0.00671141	0.0170648	0	0.0243902	0	0.010929
CGDMR	1036	Bd1-1	Bd1	7493500	7493899	399	hypo	0.00840336	0.992157	0.949275	0.0487805	0.934524	0.954774	0.971193	0	0.78836	0.45614	0.0606061	0.849206	0.761364	0.735135	0.00763359	0.00447761	0.00568182	0	0.0176768	0.0111317	0.0154083
CGDMR	1038	Bd1-1	Bd1	7494300	7494599	299	hypo	0.017316	0.957529	0.978261	0.966102	0.928144	0.969799	0.939799	0	0.824561	0.837209	0.7	0.76	0.84106	0.771739	0	0.00373134	0	0	0.00534759	0.00293255	0.00880503
CGDMR	1039	Bd1-1	Bd1	7500400	7501099	699	hypo	0.00738552	0.971549	0.971311	0.973665	0.957746	0.955484	0.968976	0.0138504	0.438803	0.506897	0.571616	0.519022	0.458134	0.50094	0.00126582	0.0117371	0.0162393	0.0142349	0.0172065	0.014659	0.00481696
CGDMR	1041	Bd1-1	Bd1	7510400	7511499	1099	hypo	0.0157068	0.018283	0.970617	0.972502	0.984756	0.957719	0.957573	0.017762	0.0123457	0.687243	0.519108	0.767699	0.441994	0.571534	0.0134159	0.00592034	0.0305746	0.0161222	0.0179243	0.0298393	0.0141509
CGDMR	1045	Bd1-1	Bd1	7553400	7553699	299	hypo	0.00588235	0.0121212	0.931298	0	0.966667	0.9375	0.0404624	0	0.023622	0.280374	0	0.307054	0.341549	0.0333333	0.00627615	0.00932401	0.00484261	0.00520833	0.00814901	0.0102041	0.0188235
CGDMR	1046	Bd1-1	Bd1	7554200	7554499	299	hyper	0.938776	0	0	0	0	0.93007	0.921951	0.0792079	0	0	0	0.0294118	0.164634	0.140496	0.00881834	0.00985222	0.00347222	0	0.0130719	0.0161943	0.00283286
CGDMR	1049	Bd1-1	Bd1	7557600	7557999	399	hypo	0.0348837	0.474453	0.962617	0.95122	0.428571	0.955224	0.909091	0.0338983	0.386667	0.552239	0.522727	0.333333	0.469565	0.574468	0.00507614	0.0316092	0.0219436	0	0.0325203	0.0316742	0.0847458
CGDMR	1055	Bd1-1	Bd1	7590000	7590199	199	hypo	0.011976	0.913043	0.977444	0.983607	0.477273	0.93609	0.956175	0	0.452381	0.621849	0.616279	0.00671141	0.128205	0.519417	0	0.0037594	0.0289855	0.0306122	0.00632911	0.00373134	0.004329
CGDMR	1057	Bd1-1	Bd1	7591000	7591399	399	hypo	0	0.983562	0.98155	0.994681	0.968	0.959002	0.961224	0.00465116	0.766696	0.843096	0.897912	0.37415	0.735622	0.808486	0.00921659	0.00988701	0.0139485	0.00720461	0.0121359	0.00951848	0.0121866
CGDMR	1071	Bd1-1	Bd1	7677300	7677599	299	hypo	0.0109649	0.935484	0.974684	0.965116	0.99	0.937313	0.991713	0.0133929	0.602151	0.551282	0.655738	0.738095	0.681818	0.741573	0.00401606	0.0181159	0.00925926	0.00952381	0.0307692	0.00465116	0.00337838
CGDMR	1072	Bd1-1	Bd1	7703700	7703899	199	hyper	0.906542	0.446154	0	NA	0.125	0	0.511111	0.00436681	0.00840336	0.0576923	NA	0	0	0.00909091	0.0225386	0.00639659	0.0157068	NA	0	0	0.00269542
CGDMR	1073	Bd1-1	Bd1	7704000	7704199	199	hyper	0.921569	0.3125	0.15	0	0.95	0.0434783	0.736842	0.025	0.0263158	0.0357143	0	0.0862069	0	0	0.00295858	0	0	0	0	0	0.00625
CGDMR	1075	Bd1-1	Bd1	7724500	7724799	299	hypo	0.00515464	0.546559	0.798883	0	0.582237	0.642202	0.430894	0	0.379518	0.559633	0	0.512195	0.56391	0.397059	0.00973236	0.0583468	0.140553	0	0.132244	0.0627615	0.0860806
CGDMR	1076	Bd1-1	Bd1	7727000	7727199	199	hypo	0	0	1	NA	0	1	0	0	0	0.454545	NA	0	NA	0	0	0.0298507	0	0	0	0.166667	0
CGDMR	1086	Bd1-1	Bd1	7884600	7884899	299	hypo	0.0526316	0.941176	0.88	0	0.888889	0.948718	0.872727	0	0.923077	0.837838	0	0.866667	0.764706	0.7	0.008	0.0447154	0.0754717	0	0.0510204	0.0201342	0.00406504
CGDMR	1087	Bd1-1	Bd1	7890400	7891499	1099	hypo	0.00262467	0.957254	0.963942	0.960606	0.969432	0.96786	0.955518	0.0134771	0.593668	0.695332	0.649624	0.703146	0.629225	0.559447	0.00741427	0.00484261	0.0119485	0.0110677	0.0104022	0.0124	0.0129827
CGDMR	1089	Bd1-1	Bd1	7908300	7908899	599	hyper	0.947569	0.0101302	0.0128205	0.0223464	0.00329489	0.0117878	0	0.630936	0.00530035	0	0.0142857	0.00674157	0.0106101	0.0101868	0.0149829	0.00660793	0.00296296	0.00711744	0.00102041	0.00649351	0.00410678
CGDMR	1090	Bd1-1	Bd1	7909000	7909199	199	hyper	0.943052	0.0196078	0.0322581	0.02	0	0.00990099	0.0127389	0.747681	0.00352113	0	0	0.0204082	0	0	0.0158172	0.00753769	0.0285714	0.0122699	0.0155039	0.0147783	0.0183486
CGDMR	1096	Bd1-1	Bd1	7991900	7992099	199	hypo	0.0238095	0.769231	0.941176	0.75	0	0.5	0.933333	0.0555556	0.227273	0.777778	0	0.5	0	0.78125	0.00621118	0.0333333	0.0144928	0	0	0	0.08
CGDMR	1098	Bd1-1	Bd1	8002100	8002299	199	hyper	0.881356	0	0	0.166667	0	0.05	0.925926	0	0.0263158	0	0	0	0	0.0833333	0.0144928	0	0.0204082	0	0	0.00990099	0
CGDMR	1114	Bd1-1	Bd1	8134100	8134299	199	hypo	0	0.702128	0.865385	0.9375	0.690909	0.305556	0.05	0	0.0422535	0	0.105263	0	0	0.0869565	0.0113422	0	0.00303951	0	0	0.0147059	0
CGDMR	1116	Bd1-1	Bd1	8166800	8166999	199	hyper	0.955056	0.037037	0	0	0	0.0952381	0	0.524138	0.025	0	0	0	0.0454545	0	0.00524476	0.00574713	0.005291	0.0333333	0	0.0315789	0
CGDMR	1119	Bd1-1	Bd1	8178200	8178599	399	hypo	0	0	0.943662	0.0740741	0.203704	0.984694	0	0.00746269	0.0238095	0.555556	0	0.0810811	0.386076	0	0.0113821	0.00512821	0.00865801	0	0	0.00537634	0
CGDMR	1121	Bd1-1	Bd1	8181900	8182099	199	hypo	0.0106383	0.0135135	0.91358	0	0.025641	0.0151515	0.0430108	0	0	0.484375	0	0.0333333	0	0	0.00530974	0.0049505	0.0461783	0.00573066	0.00486618	0.0185185	0.0170132
CGDMR	1122	Bd1-1	Bd1	8182200	8182999	799	hypo	0.00881057	0.974429	0.984887	0.971268	0.955594	0.964646	0.98022	0.0120773	0.618125	0.638736	0.711514	0.567091	0.615633	0.646246	0.00725514	0.0104845	0.0140741	0.0262172	0.0126437	0.0126689	0.0117647
CGDMR	1124	Bd1-1	Bd1	8206500	8206799	299	hyper	0.966102	0	0.0454545	NA	0	0	0	0.652174	0.030303	0	NA	0	0	0.0909091	0.00862069	0.0105263	0.0217391	0	0	0	0
CGDMR	1133	Bd1-1	Bd1	8301000	8301199	199	hypo	0.00900901	0.04	0.967213	0	0.956044	0.855615	0.903226	0.0111111	0.027933	0.402778	0	0.677083	0.339207	0.484733	0	0	0	0	0.0194175	0.0194175	0.00333333
CGDMR	1140	Bd1-1	Bd1	8392000	8392699	699	hyper	0.95723	0.0113269	0.0128205	0.0184049	0.0376176	0.0114155	0.0319549	0.787211	0.0162602	0	0.0141844	0.0159363	0.0106667	0.0407767	0.00728266	0.00323276	0.00681818	0.00409836	0.00194175	0.00822368	0.00904523
CGDMR	1147	Bd1-1	Bd1	8493300	8493499	199	hypo	0.0140845	0.911111	1	1	0.0833333	0.958333	1	0.0144928	0.534884	0.821429	1	0	0.561404	0.767123	0.00558659	0.0211268	0.0218978	0	0	0.0034965	0.0137931
CGDMR	1149	Bd1-1	Bd1	8508600	8508799	199	hyper	0.951482	0.0116732	0	0.975	0.930521	0.75	0.930622	0.382514	0	0	0.253846	0.164634	0.108527	0.37234	0.00578512	0.00129702	0.00501253	0.00534045	0.0126582	0.00259067	0.00716561
CGDMR	1154	Bd1-1	Bd1	8530100	8530299	199	hyper	0.978261	0.0135135	0	0.875	0	0	0.0540541	0.511111	0	0	0.25	0.25	0	0	0.0152439	0	0	0.025641	0	0.00787402	0.00892857
CGDMR	1158	Bd1-1	Bd1	8552600	8552799	199	hypo	0.0121951	0.658537	0.92	0.416667	0.633333	0.979167	0.891892	0	0	0.105263	0	0	0.0238095	0.0869565	0.00831025	0.0203046	0	0.0152439	0.0140845	0.00408163	0.00680272
CGDMR	1159	Bd1-1	Bd1	8554800	8555099	299	hypo	0.12	0.0869565	1	0	NA	0.2	0.428571	0	0	0.8125	0	NA	0	0	0.00819672	0	0.00757576	0	NA	0	0.0147059
CGDMR	1165	Bd1-1	Bd1	8585300	8585499	199	hypo	0.0119048	0	0.952381	0.857143	0	0	0.137255	0.0421053	0	0.875	0.04	0.0285714	0.0298507	0.0847458	0.00473934	0	0	0	0	0.025	0.00917431
CGDMR	1168	Bd1-1	Bd1	8596800	8596999	199	hypo	0.104167	0.974537	0.953846	0.7	0.94702	0.955556	0.975976	0.0740741	0.646259	0.37069	0.666667	0.54717	0.5	0.544204	0.05	0.0259434	0.0238095	0.0526316	0.0569106	0.0325733	0.0143791
CGDMR	1174	Bd1-1	Bd1	8616300	8616599	299	hyper	0.803653	0.0766423	0.047619	NA	0.13253	0.122807	0.0746269	0.559322	0.0178571	0.0212766	NA	0.04	0	0	0.00481541	0.00238095	0.00632911	NA	0.013245	0	0
CGDMR	1178	Bd1-1	Bd1	8656300	8656599	299	hypo	0.186047	0.522523	0.947368	0.963636	0.227273	0.6	0.367925	0.0096463	0.00355872	0.025	0.0336134	0.0135135	0.0150754	0.0083682	0.00361664	0.0034904	0.00641026	0.0125	0	0.0090703	0.00218818
CGDMR	1180	Bd1-1	Bd1	8668500	8668799	299	hyper	0.864382	0.331034	0.0740741	0.0125	0.0207101	0.0992556	0.166922	0.0184564	0.0134875	0.020979	0.0150376	0.0127389	0.025641	0.0120069	0.00533333	0.00524659	0	0.00470588	0	0.00547445	0.00278035
CGDMR	1181	Bd1-1	Bd1	8695000	8695199	199	hyper	0.913043	1	0	1	0	0	0	0.185022	0.617143	0	0.87037	0	0	0	0.0218409	0.00252525	0	0.00729927	0	0.0169492	0.00564972
CGDMR	1188	Bd1-1	Bd1	8749400	8749799	399	hyper	0.833333	0.0860215	0.0178571	0.176471	0.5	0.0322581	0.219512	0.0339623	0.0320513	0	0.0243902	0.0258065	0.00943396	0	0.011065	0.00671141	0.00719425	0	0.00643087	0	0
CGDMR	1201	Bd1-1	Bd1	8796200	8796499	299	hyper	0.857595	0.00806452	0.115385	0.820069	0.00784314	0.0168539	0.012987	0.759825	0.0222222	0.0485437	0.8	0	0	0.0191083	0.047384	0.00549451	0	0.0528967	0.00987654	0.00833333	0.0040404
CGDMR	1206	Bd1-1	Bd1	8869700	8869899	199	hypo	0	0.1	0.827586	NA	0	0	0	0.0441176	0	0.218182	0.333333	0.5	0.0240964	0.227273	0.0272727	0.0246914	0.0428571	0.2	0	0.0375	0
CGDMR	1208	Bd1-1	Bd1	8877100	8877699	599	hypo	0.0083682	0.963054	0.98503	0.974138	0.970128	0.00543478	0.970684	0.00347826	0.67247	0.734177	0.797834	0.750473	0.00967742	0.67713	0.00396511	0.00463917	0.013587	0.0101523	0.00731113	0.0112518	0.00473934
CGDMR	1210	Bd1-1	Bd1	8889600	8889799	199	hypo	0.00502513	0.0614525	0.891566	0.0454545	0.0384615	0	0.0643275	0.00694444	0.00952381	0.12	0.0227273	0	0	0.00934579	0	0.0125945	0.015873	0.00369004	0.0148699	0.0037594	0.00540541
CGDMR	1214	Bd1-1	Bd1	8907600	8907799	199	hypo	0	0.130435	0.904762	NA	0	0.04	0.0416667	0	0	0.181818	NA	0	0	0	0.00454546	0.0253165	0	NA	0	0.0555556	0
CGDMR	1223	Bd1-1	Bd1	8976600	8977299	699	hypo	0.103448	0.945545	0.971223	0.746032	0.959459	0.971591	0.56	0.012987	0.422222	0.706468	0.0769231	0.492308	0.594595	0.123188	0.00359281	0.00957854	0.0180879	0	0.0162791	0.0148064	0.00860832
CGDMR	1224	Bd1-1	Bd1	8977400	8977699	299	hypo	0	0.837037	0.987654	0.0307692	0.92268	0.0714286	0.965278	0	0.151899	0.254237	0	0.48	0	0.465347	0	0.0190678	0.0150943	0	0.00665188	0	0.00754717
CGDMR	1225	Bd1-1	Bd1	8977900	8978399	499	hypo	0.00873362	0.0083682	0.973958	0	0.933333	0.0109489	0.96044	0.0147059	0	0.4	0.00961539	0.304933	0.0175439	0.311828	0.00362319	0.00187266	0.00883002	0	0.00530504	0.00731261	0.0165975
CGDMR	1234	Bd1-1	Bd1	9137100	9137299	199	hypo	0.03125	0.139535	0.911765	0.869565	1	0.833333	0.5	0	0	0.24	0.3	0.758621	0.230769	0.0909091	0.063655	0.024735	0.027668	0.0268456	0	0.113636	0.0296496
CGDMR	1237	Bd1-1	Bd1	9143400	9143799	399	hyper	0.961326	0.0457064	0	0.0166667	0.135628	0.973815	0.080916	0.65991	0.0252101	0.0104167	0.020202	0.0456274	0.703947	0.0335196	0.0168067	0.0378289	0.021164	0.0206897	0.0405063	0.0164294	0.0207254
CGDMR	1238	Bd1-1	Bd1	9143900	9144099	199	hyper	1	0.0125786	0	NA	0.0136986	1	0	0.7	0	0	NA	0.0284091	0.891667	0	0	0	0	NA	0.015625	0.0113636	0
CGDMR	1243	Bd1-1	Bd1	9177200	9178099	899	hypo	0.0131827	0.95339	0.970027	0.894298	0.962315	0.0117994	0.963536	0.00813008	0.562269	0.654362	0.559664	0.44391	0.0188679	0.627841	0.0036784	0.00998967	0.0114723	0.0162095	0.0120356	0.0114177	0.0139172
CGDMR	1249	Bd1-1	Bd1	9219600	9219799	199	hypo	0.133333	0.72561	0.90625	0	0.137931	0.113402	0.647887	0.0514706	0.537313	0.518072	0	0.117647	0.0786517	0.448454	0.013913	0.212825	0.173333	0	0.00478469	0.0984456	0.233397
CGDMR	1251	Bd1-1	Bd1	9236400	9236699	299	hyper	0.987539	0.0138889	0	0.879433	0.00699301	0.979452	0	0.730028	0.0127389	0	0.496552	0.0236686	0.765579	0.0192308	0.0146735	0.00379507	0.00625	0.00288184	0.0115741	0.0206009	0
CGDMR	1253	Bd1-1	Bd1	9245800	9245999	199	hyper	0.925926	0.938776	0	0	0	0.939394	0	0.648485	0.576271	0.2	0.261905	0.163636	0.690141	0.277778	0.0294118	0.0229008	0	0.0672269	0.00364964	0.028169	0.0192308
CGDMR	1255	Bd1-1	Bd1	9269300	9269499	199	hyper	0.830189	0.0384615	0.0526316	0.25	0.4	0	0.702703	0.381579	0.410714	0.457143	0.27027	0.705882	0.307692	0.844828	0.159341	0.215488	0.169811	0.19403	0.155556	0.295547	0.254174
CGDMR	1260	Bd1-1	Bd1	9298500	9298699	199	hypo	0	0.726562	0.882353	0	0	0.875	0.880342	0	0.107143	0.361111	0	0	0.0891089	0.148649	0	0.053719	0.0127389	0.03125	0	0.0164474	0.0262009
CGDMR	1267	Bd1-1	Bd1	9330100	9330399	299	hypo	0	0	0.93617	0	0.992537	0	0	0.0208333	0	0.4375	0	0.732673	0.0178571	0	0.00205339	0	0.00286533	0	0.0113852	0	0
CGDMR	1279	Bd1-1	Bd1	9446900	9447099	199	hyper	0.833333	0.5	0	0.333333	NA	0.0833333	0.294118	0.0147059	0	0	0	NA	0	0	0.0025974	0	0.0142857	0	NA	0	0
CGDMR	1281	Bd1-1	Bd1	9475900	9476299	399	hyper	0.911168	0	0.0298507	0	0	0	0	0.295181	0.0140845	0	0	0	0.0833333	0	0.00793651	0.00793651	0.00408163	0	0	0.00996678	0.00477327
CGDMR	1290	Bd1-1	Bd1	9580300	9580599	299	hyper	0.940476	0.97619	0	0.777778	0.692308	0.538462	0.906977	0.0372671	0.0483871	0	0	0.0740741	0	0.0547945	0.00473934	0.016	0	0	0.0175439	0.00917431	0.00636943
CGDMR	1291	Bd1-1	Bd1	9586900	9587099	199	hyper	0.928571	0.910714	0	1	1	0.7	0.909091	0.00904977	0.0142857	0.0163934	0	0.0338983	0.015625	0.0166667	0.00296736	0	0	0	0	0.0125	0
CGDMR	1294	Bd1-1	Bd1	9608200	9608399	199	hypo	0	1	1	1	0.947368	0.9375	0.930233	0.0227273	0.571429	0.576923	1	0.714286	1	0.578947	0	0.00420168	0	0.117647	0.121495	0.0480769	0.0690691
CGDMR	1303	Bd1-1	Bd1	9643800	9644099	299	hyper	0.922619	0.0160256	0.0483871	0	0.105263	0.0377358	0.0212766	0.0641711	0.0119048	0	0	0.0217391	0.0141844	0	0.00761697	0.00729927	0	0	0.0119048	0.0169205	0
CGDMR	1304	Bd1-1	Bd1	9650500	9650699	199	hypo	0.0027933	0.0378788	0.85567	0.0588235	0	0	0	0	0	0.03125	0	0	0.166667	0.0454545	0	0	0	0	0	0	0
CGDMR	1305	Bd1-1	Bd1	9656000	9656699	699	hypo	0.00761905	0.975724	0.961501	0.00680272	0.0126354	0.01125	0.00691244	0.0108527	0.642125	0.578626	0.016129	0.00294985	0.00653595	0.0132075	0.00915033	0.0386629	0.0386555	0	0.00817439	0.00643777	0.00170358
CGDMR	1307	Bd1-1	Bd1	9669100	9669399	299	hyper	0.943182	0.00612245	0.0198413	0.0115607	0.00791557	0.00714286	0.00684931	0.209607	0.013624	0.0152284	0.00793651	0.0248227	0.0097561	0	0.0101138	0.00621118	0.00358423	0.0142857	0.0181818	0.0102041	0.00716846
CGDMR	1312	Bd1-1	Bd1	9746500	9746699	199	hypo	0	0.508475	0.795918	0.64	0.614286	0.655738	0.638298	0	0.037037	0.137931	0.0909091	0.136986	0.0833333	0.227273	0.0104895	0.0310078	0.0324675	0	0.0212766	0.0178926	0.023753
CGDMR	1313	Bd1-1	Bd1	9748000	9748399	399	hypo	0.128205	0	0.945455	0	0.836735	0.819149	0.878261	0.0188679	0.0232558	0.531915	0	0.466667	0.428571	0.25641	0.00779221	0.0101351	0.00309597	0	0.00606061	0.010582	0.0287611
CGDMR	1314	Bd1-1	Bd1	9749600	9750299	699	hypo	0.00753012	0.910375	0.982308	0.0123762	0.0137195	0.00569476	0.0123106	0.00775194	0.636364	0.679389	0.0128755	0.00273973	0.0131291	0.00328947	0.0115741	0.0193336	0.020979	0.00285714	0	0.0110429	0.00799201
CGDMR	1316	Bd1-1	Bd1	9754200	9754399	199	hyper	0.9375	0.00740741	0.0151515	0.966019	0.950673	0.95641	0.971642	0.152318	0	0	0.748603	0.469565	0.167442	0.581132	0.0314286	0.00674157	0	0.0277778	0.0411392	0.0383275	0.00883652
CGDMR	1325	Bd1-1	Bd1	9820300	9820799	499	hypo	0.0309524	0.028133	0.973262	0.0185185	0.0166667	0.00497512	0.0159236	0.0326531	0.00823045	0.542553	0	0.0645161	0	0	0.00814332	0.00902527	0	0.02	0.00254453	0.005386	0.00374532
CGDMR	1338	Bd1-1	Bd1	10017400	10017599	199	hypo	0.037037	1	1	NA	0.954545	1	0.916667	0	0.333333	0	NA	0.75	1	0	0	0.0526316	0	NA	0	0	0.08
CGDMR	1367	Bd1-1	Bd1	10328100	10328299	199	hyper	0.736	0	0	NA	1	0	0	0.212598	0	0	NA	0.214286	0	0	0.0786517	0	0.0153846	NA	0.0357143	0	0.0114943
CGDMR	1370	Bd1-1	Bd1	10341300	10341499	199	hyper	0.964912	0.431818	0.0196078	0.333333	0.944444	NA	0.0526316	0.470414	0.235294	0.117647	0	0.375	NA	0.0714286	0.053021	0.0240964	0.0638298	0.333333	0.156118	NA	0.0531915
CGDMR	1371	Bd1-1	Bd1	10391300	10391599	299	hyper	0.967972	0	0	0	0.970732	0.967517	0	0.707752	0	0	0	0.790885	0.844978	0.0731707	0.0137879	0.00265252	0.00724638	0	0.0124378	0.0559947	0.0243902
CGDMR	1376	Bd1-1	Bd1	10411900	10412099	199	hypo	0	0	0.820513	NA	0	0.568966	0	0.0204082	0	0.521739	NA	0.111111	0.344828	0	0	0.0176991	0.017094	NA	0	0.0113636	0
CGDMR	1379	Bd1-1	Bd1	10448100	10448399	299	hypo	0.0128205	0	1	0.954545	0	0.839286	0.953704	0	0	0.473684	0.888889	0	0.5625	0.748299	0.0138504	0.0103093	0.00917431	0.273381	0	0.0376712	0.0180723
CGDMR	1392	Bd1-1	Bd1	10661000	10661199	199	hypo	0.0181818	0	0.921875	0	0.792453	0.153846	0	0	0	0.263889	0	0.291667	0.0243902	0	0	0.00787402	0.0103627	0	0	0	0
CGDMR	1393	Bd1-1	Bd1	10664700	10665199	499	hypo	0.0137525	0.888043	0.978512	0.973176	0.0276498	0.878531	0.966087	0.00493827	0.613801	0.778723	0.739563	0.0188679	0.608187	0.701606	0.00225989	0.00956669	0.0111336	0.0141011	0.0170576	0.00829875	0.00376412
CGDMR	1394	Bd1-1	Bd1	10665400	10666099	699	hypo	0.00584795	0.960925	0.994949	0.970407	0.0137931	0.968529	0.969619	0.0115108	0.587267	0.603104	0.600368	0.0185185	0.597506	0.67428	0.0035524	0.00982581	0.0076555	0.007109	0.00622407	0.00606323	0.0076746
CGDMR	1401	Bd1-1	Bd1	10716600	10716799	199	hyper	0.925926	0.98	0.1	0	1	0.923077	1	0.846154	0.9	0	0	0.8	0.733333	0.75	0.0207254	0.0186567	0.0222222	0.1875	0.0377358	0.0143541	0.015748
CGDMR	1417	Bd1-1	Bd1	10848700	10848999	299	hyper	0.966549	0.986726	0.0300752	0.983221	0.968017	0.988353	0.984286	0.79798	0.724374	0.0182927	0.798942	0.791391	0.682667	0.772009	0.0102489	0.035468	0.0206612	0.00543478	0.0185874	0.00991501	0.00820793
CGDMR	1418	Bd1-1	Bd1	10897200	10898399	1199	hypo	0.0451411	0.95675	0.978549	0.97023	0.973574	0.971946	0.975912	0.0462833	0.640449	0.684976	0.736944	0.698317	0.650589	0.684122	0.00708061	0.0150435	0.00862641	0.01263	0.0160226	0.00874056	0.0120063
CGDMR	1421	Bd1-1	Bd1	10930500	10930699	199	hypo	0.0666667	0.382979	0.962963	0.790323	0	0.506329	0.911765	0.0892857	0.123457	0.217391	0.276596	0.0625	0.0655738	0.333333	0.0330827	0.00447427	0.0230769	0	0	0.0523077	0.0164609
CGDMR	1422	Bd1-1	Bd1	10939700	10939899	199	hyper	0.869427	0.00649351	0.00735294	0	0	0.00425532	0.011194	0.198083	0.00598802	0.0206897	0	0.0235294	0.0109091	0.00387597	0.0211538	0.00763359	0	0.00520833	0.0102041	0.00949367	0.00890208
CGDMR	1423	Bd1-1	Bd1	10940000	10940299	299	hyper	0.982278	0.0115385	0.117647	NA	0.047619	0.03125	0.0227273	0.483051	0.00869565	0	NA	0.00884956	0.0227273	0.0166667	0.0203488	0.0166667	0.0170455	NA	0.00492611	0.0116279	0
CGDMR	1424	Bd1-1	Bd1	10945700	10945899	199	hypo	0.0277778	0.4375	0.962963	0.0555556	0.666667	0.5	0.317073	0.0425532	0.02	0.0263158	0	0	0	0.0322581	0.0206186	0	0	0	0.00980392	0.0213904	0.015
CGDMR	1427	Bd1-1	Bd1	10970300	10970799	499	hypo	0.00912409	0.966184	0.977242	0.978558	0.97017	0.975973	0.983798	0.02	0.592715	0.683962	0.66817	0.605787	0.631799	0.608131	0.004914	0.0164384	0.0131265	0.00933908	0.0145631	0.00840336	0.0239173
CGDMR	1432	Bd1-1	Bd1	10984500	10984699	199	hyper	0.842105	0	0	0	0.0196078	0	0	0.00743494	0.0160428	0.0153846	0	0.031746	0	0.00970874	0.00817996	0.00854701	0	0	0	0.02	0.00925926
CGDMR	1434	Bd1-1	Bd1	11000800	11001599	799	hyper	0.943868	0.0168776	0.0238727	0.0714286	0.00909091	0.017284	0.0969213	0.745818	0.0116959	0.0191083	0.0287206	0.00995733	0.0145985	0.100275	0.0212906	0.00395883	0.00703235	0.005386	0.00357143	0.00487013	0.00658436
CGDMR	1439	Bd1-1	Bd1	11041600	11042099	499	hypo	0.0921986	0.313589	0.992593	0.0149254	0.00947867	0.011236	0	0.0116279	0.0547445	0.514019	0	0.00671141	0	0.0106383	0.00494071	0.00424628	0.00947867	0	0.0109409	0.00851064	0.00363636
CGDMR	1443	Bd1-1	Bd1	11086900	11087099	199	hypo	0.0243902	0.809524	0.909091	0.6	0.705882	0.944444	0.956522	0.0727273	0.216216	0.166667	0	0.05	0.285714	0.307692	0.0176471	0.0227273	0.039604	0	0.0138889	0	0.0275862
CGDMR	1447	Bd1-1	Bd1	11132200	11132399	199	hypo	0	0.987179	1	1	1	0.977273	0.982906	0	0.651163	0.552632	0.833333	0.72549	0.595506	0.655738	0	0.00458716	0.019802	0.0392157	0.04	0.00425532	0.00625
CGDMR	1454	Bd1-1	Bd1	11194400	11194599	199	hyper	0.869048	0.8	0	0	0	0.0357143	0	0	0	0.0967742	0	0	0	0.0111111	0.0132159	0.00900901	0	0	0	0.025	0
CGDMR	1456	Bd1-1	Bd1	11202400	11202599	199	hypo	0	0.5	0.833333	NA	1	0.727273	0.333333	0	NA	0	NA	NA	NA	NA	0.00909091	0.0958904	0	0	0	0.0338983	0
CGDMR	1460	Bd1-1	Bd1	11283900	11284599	699	hypo	0.0891892	0.974085	0.973333	0.967363	0.96237	0.968359	0.965358	0.108401	0.686673	0.600973	0.657391	0.638073	0.624144	0.657364	0.0222222	0.039499	0.0176263	0.0280584	0.0132626	0.0141405	0.0454034
CGDMR	1461	Bd1-1	Bd1	11284700	11284899	199	hypo	0.0364583	0.97037	0.975	0.969231	0.937107	0.984456	0.986911	0.0416667	0.593023	0.583333	0.628205	0.494737	0.564103	0.54386	0.0625	0.00807754	0.0229885	0.0027248	0.00647249	0.00488998	0.0124858
CGDMR	1466	Bd1-1	Bd1	11319900	11320099	199	hyper	0.829218	0.00943396	0.0197044	0.0195122	0	0.0118343	0.00151976	0.00367647	0.00680272	0.00970874	0	0	0.00729927	0.00653595	0.0056926	0.00323625	0	0	0.0145985	0.00350877	0.00324675
CGDMR	1467	Bd1-1	Bd1	11322200	11322599	399	hyper	0.940493	0	0.00438597	0	0.00576369	0.00373134	0.0026738	0.056701	0.00877193	0	0	0	0	0.0145985	0.0130435	0.00428571	0.0026455	0.00900901	0.00176367	0.00442478	0.00891266
CGDMR	1469	Bd1-1	Bd1	11323400	11323799	399	hypo	0.00382409	0.970634	0.976331	0.980226	0.975143	0.953405	0.980344	0	0.671498	0.660714	0.655844	0.877193	0.713542	0.8	0.00961539	0.00543478	0.00746269	0.00858369	0	0.00588235	0.0589623
CGDMR	1470	Bd1-1	Bd1	11328000	11328699	699	hypo	0.0373134	0.95443	0.991597	0.981481	0.963124	0.968127	0.971765	0.0206612	0.59887	0.653659	0.672515	0.635569	0.577957	0.734513	0.00851789	0.0191412	0.0187755	0.0128425	0.0260652	0.0242454	0.0134551
CGDMR	1475	Bd1-1	Bd1	11347300	11347599	299	hyper	0.791045	0	0	0	0	0	0	0.663551	0	0	0	0.1	0.04	0	0.0862069	0	0.0135135	0	0	0	0
CGDMR	1477	Bd1-1	Bd1	11356400	11356699	299	hyper	0.936293	0.00164204	0.00722022	0.00913242	0.00386847	0.0164425	0.00531915	0.312268	0.00882353	0	0	0.00348432	0.00607903	0.00319489	0.0317919	0.003861	0.0239234	0	0.0059761	0.00388349	0.00210526
CGDMR	1479	Bd1-1	Bd1	11363100	11363399	299	hyper	0.98	0.555556	0	1	0	0	0.0238095	0	0.00847458	0	0.0153846	0	0	0.00793651	0.00734214	0.0123203	0.0177778	0	0.0196078	0	0.0106838
CGDMR	1480	Bd1-1	Bd1	11363600	11363899	299	hyper	0.954802	0.688	0.04	0.986842	0	0.0145985	0.0384615	0.0221519	0	0.00746269	0.0196078	0	0.0111732	0.013986	0.00684931	0.00797448	0.002849	0.0058651	0	0.003663	0.0142566
CGDMR	1486	Bd1-1	Bd1	11452900	11453399	499	hyper	0.90327	0.0108401	0.0031348	0.0147601	0.00865801	0.00912409	0.0755886	0.139932	0.00626959	0.020979	0.0169492	0.0140845	0.0143885	0.0522023	0.0102623	0.00466853	0.00453515	0.00727273	0.00236407	0.00401606	0.00898473
CGDMR	1491	Bd1-1	Bd1	11479400	11479799	399	hyper	0.928571	0	0.0268817	0	0.00374532	0.00383142	0	0.247788	0	0	0	0.0181818	0	0.018018	0.0150602	0.00191205	0.00909091	0	0.004329	0	0.0126183
CGDMR	1492	Bd1-1	Bd1	11480200	11480399	199	hypo	0	0.828283	0.916667	0	0	0	0	0	0.112245	0.388889	0	0.125	0	0	0	0	0	0	0	0	0
CGDMR	1493	Bd1-1	Bd1	11480700	11481099	399	hypo	0.0247934	0.0263158	0.957447	0.0555556	0	0.0350877	0.0853659	0.0105263	0.0363636	0.282051	0	0	0	0.0266667	0	0	0	0.0121951	0.0117647	0	0.00274725
CGDMR	1496	Bd1-1	Bd1	11494800	11495799	999	hyper	0.939002	0.346336	0.00367647	0.0105263	0.246241	0.063197	0.017134	0.45702	0.126806	0.0157068	0.0142857	0.0274725	0.00681818	0.0113895	0.0163577	0.00619195	0.0106383	0.00273973	0.00973236	0.011324	0.00813008
CGDMR	1497	Bd1-1	Bd1	11496000	11496699	699	hyper	0.954106	0.946237	0	0.981818	0.953368	0.964691	0.856322	0.736138	0.24498	0.0309278	0.586957	0.214876	0.670213	0.243986	0.0120382	0.00804136	0.0090703	0.00480769	0.00611247	0.0129577	0.0046332
CGDMR	1499	Bd1-1	Bd1	11497400	11497699	299	hyper	0.9875	0.047619	0	NA	0	0	0.047619	0.908571	0.02	0.025641	0	0	0	0	0.0266667	0	0.0357143	0	0	0.0178571	0.021978
CGDMR	1501	Bd1-1	Bd1	11510000	11510299	299	hyper	0.902439	0	0.0666667	0	0.0555556	0	0	0.376923	0.0333333	0	0	0	0	0	0	0.0114286	0.0188679	0	0.0677966	0	0
CGDMR	1507	Bd1-1	Bd1	11571800	11571999	199	hypo	0.0163934	0	0.886792	0	0	0	0	0.0142857	0	0.350877	0	0	0	0	0.011976	0	0.0347222	0	0	0	0.0169492
CGDMR	1510	Bd1-1	Bd1	11587000	11587199	199	hypo	0	0.943396	1	0.988636	0.948187	0.974522	0.950704	0	0.0133333	0.1	0.346667	0.34507	0.0232558	0.0938628	0.00980392	0	0	0	0.00840336	0	0
CGDMR	1515	Bd1-1	Bd1	11647100	11647299	199	hypo	0	0.842105	1	NA	1	0.961538	0.921569	0	0.724138	0.8125	NA	1	0.533333	0.5	0	0.0070922	0	NA	0	0.0107527	0.0104167
CGDMR	1516	Bd1-1	Bd1	11648900	11649099	199	hypo	0	1	0.882353	1	1	1	1	0	0.9	0.6875	1	1	1	0.454545	0	0	0	0.25	0	0	0.0416667
CGDMR	1522	Bd1-1	Bd1	11714600	11714799	199	hyper	0.833333	1	0	0.846154	0.714286	0.863636	0.978261	0.034965	0	0	0	0	0.015873	0	0.031339	0.0163043	0	0	0	0.00540541	0.00613497
CGDMR	1530	Bd1-1	Bd1	11782100	11783299	1199	hypo	0.00834106	0.965395	0.975936	0.968397	0.974859	0.97033	0.97948	0.0218712	0.727443	0.762125	0.743	0.742638	0.731434	0.76691	0.0101376	0.0327247	0.0536557	0.0353734	0.0656859	0.029703	0.0486791
CGDMR	1531	Bd1-1	Bd1	11783400	11783799	399	hyper	0.918623	0.0015748	0.00668896	0	0.0186335	0.00753769	0.00497512	0.650253	0.00445434	0.00497512	0	0	0.00423729	0.00373832	0.0165074	0.00497512	0.0034965	0.0212766	0.00338983	0.0159236	0.00540541
CGDMR	1537	Bd1-1	Bd1	11845700	11845899	199	hypo	0.0454545	0.0487805	0.888889	0	0.939394	0.936	0.842767	0.123894	0.288136	0.46875	0.344828	0.561798	0.54	0.429688	0.0362319	0.0230769	0.0695652	0.011236	0.0107527	0.00239808	0.00391389
CGDMR	1539	Bd1-1	Bd1	11849900	11850099	199	hypo	0.025641	0.259259	0.862069	0.818182	0.111111	0	0.583333	0.0645161	0	0	0	0	0.0344828	0	0	0	0	0	0	0.0121951	0
CGDMR	1540	Bd1-1	Bd1	11875700	11876499	799	hypo	0.0150943	0.19544	0.950495	0	0.0229008	0.934884	0.915761	0.00925926	0.0472103	0.688406	0	0.0177515	0.708738	0.187279	0.0161464	0.00747664	0.0097493	0.0183486	0.0255941	0.0235921	0.0059322
CGDMR	1543	Bd1-1	Bd1	11902600	11902799	199	hypo	0.183333	0.848837	0.976744	0.85	0.942308	0.953488	0.730337	0	0.35	0.670391	0.580357	0.564593	0.461883	0.546917	0.0160858	0.0387374	0.0634921	0	0.105651	0.0243363	0.044843
CGDMR	1545	Bd1-1	Bd1	11907500	11907699	199	hyper	0.845238	0.711246	0	0.912791	0.886364	0.771429	0.949062	0.271676	0.177966	0	0.280702	0.359375	0.247788	0.396825	0.019802	0.00265957	0	0.0239521	0.0171674	0.00992064	0.00522193
CGDMR	1549	Bd1-1	Bd1	11934600	11934799	199	hyper	0.748503	0	0	0	0.0151515	0	0.020202	0.128205	0.015873	0	0	0	0	0.0147059	0.0218341	0.0263158	0	0	0	0.04	0
CGDMR	1566	Bd1-1	Bd1	12016100	12016299	199	hypo	0	0.25	0.875	1	0	0	0	0.0384615	0	0	NA	0	0	0	0	0	0	0	0	0.00892857	0
CGDMR	1577	Bd1-1	Bd1	12063700	12063899	199	hyper	0.878049	0.342857	0	0	0	0	0.333333	0.0125	0	0.0882353	0.0384615	0	0	0	0	0.0122699	0	0.0273973	0.0243902	0	0
CGDMR	1580	Bd1-1	Bd1	12091400	12091599	199	hypo	0.0366972	0.885714	0.979167	0.989011	1	0.948357	0.944186	0.0909091	0.307692	0.689189	0.858696	0.77451	0.701754	0.871429	0	0.00590551	0.0139535	0.014218	0.0268817	0.00564175	0.0223602
CGDMR	1593	Bd1-1	Bd1	12129000	12129199	199	hypo	0	0.984043	0.993333	0.92437	0.961538	0.97561	0.982587	0.0365854	0.641026	0.556701	0.596026	0.561321	0.734139	0.734021	0.0121951	0.0142586	0.0102828	0.0078125	0.00627943	0.0139211	0.0140406
CGDMR	1595	Bd1-1	Bd1	12140800	12140999	199	hypo	0	0.0666667	0.964912	0	0	0.0526316	0.178571	0	0	0.466667	0	0	0	0	0.00892857	0.0263158	0.0123457	0	0	0	0
CGDMR	1596	Bd1-1	Bd1	12142600	12142799	199	hypo	0	0	0.875	0	0	0	0.0638298	0.037037	0	0.258065	NA	0	0	0	0.00900901	0.00303951	0	0	0	0	0.00903615
CGDMR	1601	Bd1-1	Bd1	12176600	12176999	399	hyper	0.910734	0.00563698	0.00724638	0.00775194	0.00860585	0.00688468	0.00669344	0.471002	0.00743494	0	0.0299401	0	0	0.0119617	0.00720906	0.0106242	0.026087	0.0643275	0.0347222	0.013363	0.0263158
CGDMR	1603	Bd1-1	Bd1	12182200	12182399	199	hyper	0.942308	0	0	NA	0	0	0	0.868421	0	0	NA	0	0	0	0.0326531	0.00689655	0	NA	0	0	0
CGDMR	1604	Bd1-1	Bd1	12183400	12183599	199	hyper	0.992424	0.03125	0.0833333	0	0	0	0	0.721739	0	0	0	0	0	0	0.0154739	0.0070922	0	0	0	0	0
CGDMR	1607	Bd1-1	Bd1	12185800	12186399	599	hyper	0.957401	0.0103481	0.0043384	0.0122951	0.0176367	0.0105422	0.0143369	0.545303	0.00133156	0.0132013	0.00544959	0.00712589	0.0113895	0.0167224	0.00932401	0.00226074	0.00420168	0.00528169	0.00140647	0.0116473	0.00518135
CGDMR	1612	Bd1-1	Bd1	12237900	12238099	199	hypo	0.145455	0.536842	0.910256	0	0.3	0.788732	0	0	0	0.0566038	0	0	0.153846	0	0.0058997	0	0	0	0	0.00766283	0
CGDMR	1613	Bd1-1	Bd1	12249700	12249899	199	hypo	0	0.0138889	1	1	0.0689655	0.853333	0.844828	0.0588235	0	0	0	0.030303	0.0421053	0.00980392	0.0113208	0.00413223	0.0263158	0	0.0166667	0	0
CGDMR	1622	Bd1-1	Bd1	12283600	12283899	299	hypo	0.0217391	0.903846	1	NA	0.4	0	0.0555556	0.0235294	0.176	0.111111	0	0	0	0.0689655	0.0149813	0.00244499	0	0	0	0	0
CGDMR	1640	Bd1-1	Bd1	12434700	12434999	299	hypo	0	0.00299401	0.983607	0	0.94041	0.902375	0.00364964	0.00826446	0.003663	0.634286	0	0.855146	0.135472	0.00492611	0	0.008	0.00689655	0.00518135	0.0127462	0.00337838	0.00461894
CGDMR	1642	Bd1-1	Bd1	12456000	12456199	199	hypo	0.037037	0.925926	0.875	0.5	1	0.758621	0.675325	0.106796	0.381818	0.631579	0.12	0.272727	0.20202	0.0986842	0.00421941	0	0.0169492	0	0	0.0545455	0.00512821
CGDMR	1644	Bd1-1	Bd1	12477400	12477599	199	hyper	0.795918	0.0215054	0	0.0263158	0	0.010989	0.0379747	0.0526316	0	0	0	0	0	0	0.00808625	0.00518135	0	0	0	0.0186916	0.013245
CGDMR	1645	Bd1-1	Bd1	12490400	12490599	199	hypo	0	0.933333	1	1	0.6875	0.9375	0.967742	0.166667	0.59375	0.347826	0.352941	0.314286	0.72	0.615385	0	0.12844	0.010989	0.0379747	0.0521739	0.0625	0.0748663
CGDMR	1646	Bd1-1	Bd1	12508100	12508399	299	hyper	0.87234	0	0.025	0.0234742	0	0.0172414	0.00406504	0.461538	0.0410959	0.0126582	0.0714286	0	0.0344828	0.0109489	0.122302	0.0381356	0.0159363	0.0391705	0.0588235	0.0209205	0.0202177
CGDMR	1650	Bd1-1	Bd1	12531200	12531499	299	hypo	0	0.62	0.846154	0.589286	0	0	0	0.00854701	0	0	0	0	0	0.0208333	0.0115207	0	0	0	0.00740741	0.036036	0.0153846
CGDMR	1653	Bd1-1	Bd1	12577800	12578599	799	hypo	0.0218254	0.977208	0.98785	0.977549	0.0338983	0.974935	0.981267	0.00168067	0.819635	0.815257	0.826609	0.0202703	0.796304	0.82976	0.00447628	0.0216495	0.0146147	0.0161792	0.00301659	0.029261	0.0225845
CGDMR	1659	Bd1-1	Bd1	12626800	12627399	599	hyper	0.944853	0.0059453	0.0197628	0.0141988	0.0154639	0.003003	0.0143014	0.417062	0.00453515	0.013986	0.0169492	0.0308642	0.0028169	0.00609756	0.032888	0.00487805	0.00877193	0	0.0134409	0.00516129	0.00197824
CGDMR	1668	Bd1-1	Bd1	12741800	12742599	799	hyper	0.937712	0.0360169	0.0209059	0.0205882	0.976543	0.0402685	0.0359408	0.689516	0.0570175	0.025	0.0362538	0.925872	0.0534884	0.037037	0.0255743	0.00954033	0.00578035	0.0150068	0.0403691	0.00459982	0.00482315
CGDMR	1673	Bd1-1	Bd1	12794100	12794699	599	hyper	0.939623	0.00619835	0.019802	0.0171233	0.913713	0.040625	0.0318627	0.168091	0	0	0.0292398	0.304965	0.0116279	0.0141509	0.0105777	0.013382	0.0112994	0.00510204	0.0140562	0.00490998	0.00410959
CGDMR	1679	Bd1-1	Bd1	12884900	12885099	199	hypo	0	0.978723	0.982143	0.916667	0	0.973783	0.955157	0.0930233	0.888889	0.913793	0.783784	0.428571	0.625	0.73057	0.0185185	0.0220994	0.00490196	0.0107527	0	0.011811	0.0236686
CGDMR	1680	Bd1-1	Bd1	12885500	12885899	399	hypo	0.0243902	0.975862	0.977401	0.952596	0.336283	0.976501	0.965268	0.0104167	0.415385	0.304878	0.264	0	0.331081	0.237374	0.0060423	0.0206327	0.00943396	0.00864553	0.00505051	0.0130486	0.0208729
CGDMR	1687	Bd1-1	Bd1	12966300	12966799	499	hyper	0.895641	0.00784314	0.0149254	0.0357143	0.0260664	0.00746269	0.0168269	0.459038	0.00657895	0.0257353	0.0178571	0.00930233	0.0112676	0.0231214	0.0236729	0.010274	0.0406091	0.0106952	0.00500835	0.00632911	0.0216561
CGDMR	1689	Bd1-1	Bd1	12977200	12977399	199	hyper	0.926991	0.0121212	0.0188679	0.0454545	0.0275862	0.958984	0.974044	0.423077	0.025	0	0.0357143	0.0238095	0.636015	0.716049	0.00510204	0.0107914	0	0.0208333	0	0.0107527	0.0232186
CGDMR	1695	Bd1-1	Bd1	13041600	13041799	199	hypo	0	0.958333	1	0	0	0	0	0	0	0.473684	0.142857	0.142857	0.0588235	0	0.00285714	0	0.00456621	0	0.00680272	0	0
CGDMR	1698	Bd1-1	Bd1	13091200	13091399	199	hypo	0	0	0.972973	0.6	0	0.642857	0.285714	0.0196078	0	0.438596	0	0	0	0	0.0185185	0	0.0469208	0	0.00980392	0	0
CGDMR	1704	Bd1-1	Bd1	13127300	13127499	199	hypo	0	0.25	1	0	0.783784	0.73913	0.294118	0	0.105263	0.2	0	0.0666667	0.117647	0.0285714	0.008	0	0.0168067	0	0.0188679	0.00990099	0
CGDMR	1707	Bd1-1	Bd1	13170900	13171099	199	hypo	0.03125	0.987421	1	0.947368	0.921569	0.981707	0.970443	0.0204082	0.741259	0.770833	0.111111	0.857143	0.679104	0.736264	0.00348432	0.0216718	0.034749	0.028169	0.0104167	0.0152801	0.0118265
CGDMR	1708	Bd1-1	Bd1	13171200	13171799	599	hypo	0.0106101	0.974359	0.960961	0.0218978	0.967504	0.962662	0.904834	0.0110619	0.867669	0.827922	0.0454545	0.8	0.794579	0.820029	0.00332779	0.0124621	0.0140396	0.00681818	0.0130011	0.0151369	0.00797448
CGDMR	1710	Bd1-1	Bd1	13178100	13178499	399	hyper	0.867647	0.82567	0.0150754	0.957173	0.977667	0.959502	0.990654	0.418502	0.59507	0	0.427948	0.710731	0.322034	0.730994	0.0171756	0.0201511	0	0.0057971	0.0223015	0.00378788	0.0372272
CGDMR	1712	Bd1-1	Bd1	13212900	13213399	499	hyper	0.965241	0.912707	0.0331492	0.897216	0.0824524	0.939716	0.922404	0.142349	0.594221	0.00862069	0.42838	0.0708661	0.537445	0.5	0.0194175	0.0177563	0	0.0168712	0.0729412	0.0498891	0.119266
CGDMR	1713	Bd1-1	Bd1	13213700	13214499	799	hyper	0.954248	0.952316	0.00515464	0.985965	0	0.971014	0.978062	0.0409836	0.714824	0.0213904	0.245	0	0.265781	0.254206	0.00923483	0.0129289	0.00403226	0.00167504	0.00925926	0.0106838	0.00770308
CGDMR	1715	Bd1-1	Bd1	13349400	13349599	199	hyper	0.846154	0.583333	0.0742857	0.030303	0.708134	0.701923	0.789474	0.0344828	0.0595238	0	0	0.0223881	0.00595238	0.0414201	0	0.005291	0	0.0833333	0.00694444	0.0052356	0
CGDMR	1720	Bd1-1	Bd1	13377700	13377999	299	hypo	0.0225	0.975936	0.981618	0.975281	0.888571	0.962751	0.975186	0.0522388	0.53304	0.668639	0.803797	0.632754	0.637931	0.717435	0.0184971	0.022003	0.0118577	0.0236967	0.00785855	0.0213476	0.0427155
CGDMR	1726	Bd1-1	Bd1	13463100	13463299	199	hyper	0.87037	0.983607	0	0.975309	0.988889	0.992424	0.978022	0.626667	0.75	0.0384615	0.690476	0.427273	0.844262	0.415584	0.01	0.00694444	0.00970874	0.00689655	0.00511509	0.0106762	0.0123023
CGDMR	1727	Bd1-1	Bd1	13464000	13464299	299	hypo	0	0.06	0.958333	0.0526316	0.157895	0.971429	0.0609756	0	0	0.385965	0	0.117647	0.383838	0.0515464	0.00684931	0.015748	0	0	0	0	0.0115607
CGDMR	1733	Bd1-1	Bd1	13506900	13507099	199	hypo	0.0106383	0.940594	0.965517	0.0701754	0.845528	0.902703	0.0660793	0	0.530864	0.740741	0	0.68	0.507463	0.0103093	0	0.04038	0.0265487	0.0824742	0.0155039	0.0257511	0.0272277
CGDMR	1735	Bd1-1	Bd1	13532100	13532299	199	hypo	0.027027	0.0142857	0.973684	0.949749	0.922481	0.792793	0.902367	0	0	0.2	0.146667	0.0714286	0.0327869	0.0609756	0	0	0	0.107981	0.00571429	0.012605	0.0262467
CGDMR	1737	Bd1-1	Bd1	13539000	13539199	199	hypo	0	0	0.972222	0.971429	0.914286	0.0357143	0.914894	0.0526316	0	0	0.0909091	0.0769231	0.0909091	0.117647	0	0	0	0.0204082	0	0.00680272	0
CGDMR	1741	Bd1-1	Bd1	13557300	13557999	699	hypo	0.0190597	0.961589	0.988095	0.957611	0.960227	0.958913	0.959467	0.0102171	0.753501	0.80774	0.810624	0.770903	0.768645	0.787101	0.0100376	0.0229584	0.0141965	0.0230115	0.0187087	0.0117609	0.0139587
CGDMR	1744	Bd1-1	Bd1	13598900	13599099	199	hyper	0.954545	0.571429	0	0	0.166667	0.5	0	0.375566	0.0144928	0.05	0.125	0.037037	0	0	0.00773994	0.0104712	0.00507614	0	0	0.00970874	0
CGDMR	1747	Bd1-1	Bd1	13676700	13677299	599	hypo	0.0125	0.912371	0.981707	0.974249	0.980741	0.971166	0.976626	0.00612245	0.0791209	0.660606	0.781302	0.713615	0.671859	0.726242	0.00512821	0.00246103	0.0145349	0.0425944	0.0254237	0.0297569	0.0286778
CGDMR	1749	Bd1-1	Bd1	13711700	13711899	199	hyper	0.834123	0.509579	0	0.0967742	0.615	0	0.890052	0.0137931	0.0153061	0	0.0185185	0.00625	0.0148148	0.0175439	0.0116054	0.0126582	0	0	0	0.00775194	0.00257732
CGDMR	1755	Bd1-1	Bd1	13743700	13743899	199	hyper	0.757353	0.801282	0.0204082	0	0	0.00847458	0	0.216667	0.320513	0.0277778	0.0222222	0	0	0.00546448	0.0273349	0.0186047	0.00847458	0	0	0.00544959	0
CGDMR	1756	Bd1-1	Bd1	13744000	13744199	199	hyper	0.872483	0.873563	0.011236	0	0.0165746	0.023622	0.0174672	0.28866	0.435484	0	0.0178571	0.00826446	0.0222222	0.0151515	0.0142857	0.025641	0	0.0192308	0	0.0107914	0.00809717
CGDMR	1759	Bd1-1	Bd1	13763000	13763399	399	hypo	0.00980392	0.00363636	0.969605	0.913295	0.960106	0.956599	0.939832	0.014245	0	0.445312	0.340476	0.325503	0.379908	0.397456	0.00952381	0.00516796	0.0179211	0.0122549	0.014658	0.0178023	0.0131868
CGDMR	1760	Bd1-1	Bd1	13763700	13763899	199	hypo	0	0.0181818	0.979798	0.96875	0.912698	0.996094	0.988142	0	0	0.387755	0.629032	0.36	0.514124	0.495413	0	0.00588235	0	0	0.0117302	0.00429184	0.00620155
CGDMR	1761	Bd1-1	Bd1	13764000	13764399	399	hypo	0.0331126	0.0114943	0.989474	0.975904	0.971545	0.967059	0.944444	0.0163934	0.0193237	0.746377	0.680628	0.731915	0.756329	0.632787	0.0174312	0.00124844	0.014531	0.0118812	0.0150188	0.00754458	0.0108359
CGDMR	1763	Bd1-1	Bd1	13765800	13765999	199	hypo	0.197368	0.4	0.964912	0.986111	0.988764	0.989796	0.978417	0	0.00869565	0.75641	0.826087	0.783505	0.867188	0.698925	0.0173776	0.00991735	0.00869565	0.00831947	0.00148588	0.00506971	0.0144068
CGDMR	1765	Bd1-1	Bd1	13774700	13775199	499	hypo	0	0	0.935714	0.856522	0.807487	0.782178	0.74375	0.0337838	0	0.398148	0.195767	0.211538	0.141361	0.220844	0.0107914	0.00520833	0.0211416	0.00156986	0.011583	0.00833333	0.00643777
CGDMR	1768	Bd1-1	Bd1	13794800	13795099	299	hyper	0.888889	0.826923	0	0	0	0.833333	0	0.0151515	0.0117647	0.0149254	0	0	0	0.0123457	0.0138408	0.00760456	0.00518135	0.00729927	0	0.00913242	0.00854701
CGDMR	1777	Bd1-1	Bd1	13858200	13859199	999	hyper	0.940462	0.954311	0.0116822	0.942138	0.932394	0.975734	0.951701	0.148299	0.248768	0.0342466	0.176166	0.239001	0.507368	0.116838	0.0174748	0.00786627	0.00337079	0.0053223	0.0171406	0.00541205	0.00807453
CGDMR	1779	Bd1-1	Bd1	13889900	13890599	699	hypo	0.00302343	0.0105871	0.979143	0.9824	0.97599	0.971384	0.974371	0.012	0.0017452	0.502193	0.442997	0.55641	0.423	0.426025	0.00832466	0.00556715	0.00691443	0.0102623	0.00728051	0.00565611	0.00971482
CGDMR	1782	Bd1-1	Bd1	13927100	13927299	199	hypo	0.135802	0.448718	0.864865	0.7	0.692308	0.363636	0.828125	0.0116279	0.00973236	0.00558659	0	0.00847458	0.0181818	0	0	0.00403226	0.00840336	0.0487805	0.0060241	0.0147059	0
CGDMR	1787	Bd1-1	Bd1	14049800	14050199	399	hypo	0.0177778	0.164286	0.956522	0	0.305085	0.181818	0.108844	0.00961539	0.0472441	0.462963	0.0289855	0.0645161	0.282828	0.0506329	0	0	0.004329	0.0108303	0.0326531	0.0926366	0.0053286
CGDMR	1788	Bd1-1	Bd1	14050300	14050799	499	hypo	0.00319489	0.519894	0.970874	0	0.962751	0.933824	0.908879	0.0150602	0.0740741	0.445887	0.0133333	0.0934343	0.0807692	0.136612	0.00344828	0.0101394	0.00910747	0	0.00383632	0.00585651	0.00233645
CGDMR	1789	Bd1-1	Bd1	14050900	14051699	799	hypo	0.0171103	0.0247934	0.902494	0.025	0.97429	0.957043	0.956982	0.0153846	0	0.0784983	0	0.526112	0.244648	0.234475	0.0153846	0.0046168	0.00528541	0	0.00878972	0.00368615	0.00601278
CGDMR	1790	Bd1-1	Bd1	14051800	14052599	799	hypo	0.0162933	0.00526316	0.964974	0.011236	0.952982	0.96812	0.962963	0.01321	0.00528169	0.299389	0.0141509	0.742248	0.68523	0.237712	0.0100612	0.00320513	0.0202922	0.00526316	0.00993049	0.0114515	0.00940144
CGDMR	1793	Bd1-1	Bd1	14093400	14093599	199	hyper	1	0.973684	0	NA	0	0.0666667	0.0645161	0.449541	0.728972	0.0416667	0.142857	0	0.0487805	0	0.00288184	0.0666667	0.0117647	0.0178571	0.0153846	0	0.0052356
CGDMR	1794	Bd1-1	Bd1	14093800	14094199	399	hyper	0.942177	0.0176991	0	0.00862069	0	0.00909091	0.0258621	0.0642202	0.0412371	0.0147059	0.0425532	0	0.00763359	0	0.00264901	0.00466201	0	0.0136986	0	0.00787402	0.0097629
CGDMR	1795	Bd1-1	Bd1	14094400	14094899	499	hyper	0.935484	0	0.036036	0.0163934	0	0.0294118	0.00854701	0.431138	0.0166667	0.0106383	0	0	0	0	0.00683371	0.00568182	0	0.00847458	0	0.00990099	0.0149701
CGDMR	1796	Bd1-1	Bd1	14095000	14095799	799	hyper	0.924062	0.00271739	0.00265252	0.00707547	0.0378072	0.0111111	0.0140351	0.171171	0.0168067	0.00414938	0.00724638	0	0.0144509	0.00897666	0.00816882	0.004004	0	0	0.00416667	0.00583942	0.00991735
CGDMR	1797	Bd1-1	Bd1	14103500	14104399	899	hyper	0.958756	0.963751	0.0167286	0.00206186	0.960474	0.0105597	0.00873786	0.533636	0.651741	0.00936768	0	0.699808	0.00650195	0.00729927	0.0143621	0.00873908	0.00655431	0.0118026	0.0189816	0.0108016	0.00789058
CGDMR	1803	Bd1-1	Bd1	14137200	14137599	399	hyper	0.864629	0.582759	0	0.215686	0.679104	0.0359281	0.342949	0.0165746	0.0027027	0.00540541	0.00515464	0.00977199	0.005	0.00887574	0.0162192	0.0105263	0.00697674	0.00854701	0.00534188	0.00788644	0.00737619
CGDMR	1810	Bd1-1	Bd1	14189200	14189399	199	hypo	0	0.80916	0.9	0.939759	0.804598	0.916667	0.920792	0.0344828	0.44	0.15	0.628571	0.416667	0.24	0.232558	0.0102389	0.0137931	0.00787402	0.0207254	0.00689655	0.0262295	0.020979
CGDMR	1813	Bd1-1	Bd1	14229100	14229299	199	hyper	0.849206	0.0150754	0.0198676	0.18705	0.846809	0.413408	0.851351	0.0101266	0.0188679	0.00662252	0	0.0389105	0.00497512	0.0219436	0.0112945	0.00624025	0.00956938	0.00455581	0.00965517	0.0018622	0.0075543
CGDMR	1815	Bd1-1	Bd1	14272600	14272799	199	hypo	0	0	0.965517	0	NA	0	0	0.0243902	0	0.538462	0	NA	NA	0	0	0	0	0	NA	0	0
CGDMR	1816	Bd1-1	Bd1	14273000	14273299	299	hypo	0.00561798	0	0.964286	0	0.0357143	0	0.0305344	0.0114943	0	0.642857	0.028169	0.08	0	0.0306122	0.0122449	0	0.015748	0.00588235	0	0	0
CGDMR	1821	Bd1-1	Bd1	14311100	14311499	399	hyper	0.832512	0.00831025	0	0	0	0.00346021	0.921847	0.468429	0.00749064	0	0.0192308	0	0.004	0.397149	0.00979112	0.00522648	0.00362319	0.0046083	0.00269542	0.00151286	0.00797101
CGDMR	1822	Bd1-1	Bd1	14314600	14314799	199	hypo	0.0609756	0	1	0.97619	0.6	0.911765	0	0.02	0.0194175	0.293333	0.290698	0.078125	0.0740741	0.0428571	0.010101	0.0114068	0.0382166	0	0	0.00956938	0
CGDMR	1825	Bd1-1	Bd1	14325700	14326399	699	hyper	0.926812	0.00556793	0.008	0.938992	0.0034188	0.003861	0.00503145	0.436364	0.0111524	0.0122951	0.532847	0.00298507	0.0133333	0.0133843	0.0173362	0.00301811	0.00700935	0.0190174	0.00380952	0.00584795	0.00108342
CGDMR	1828	Bd1-1	Bd1	14341400	14341599	199	hypo	0.00371747	0	0.894737	0.79845	0.522388	0.0177515	0.00760456	0.00952381	0.0204082	0.148148	0.0373134	0.106061	0	0	0.00862069	0	0	0.0188679	0.0714286	0	0
CGDMR	1830	Bd1-1	Bd1	14386000	14386299	299	hyper	0.850299	0	0	0	0	0.0363636	0.0075188	0.466165	0	0.0183486	0	0.0333333	0	0.0114943	0.0442478	0	0.0321637	0	0.0119048	0.00727273	0.00684931
CGDMR	1833	Bd1-1	Bd1	14396800	14396999	199	hyper	0.839286	0.117647	0	0	1	0	0	0.0659341	0	0	0	0	0	0	0	0	0	0	0	0	0.00454546
CGDMR	1834	Bd1-1	Bd1	14397400	14398099	699	hypo	0.0133511	0.00686813	0.980668	0.978505	0.0140562	0.973343	0.970607	0.0113402	0.00743494	0.563319	0.598611	0	0.642183	0.558952	0.00780488	0.00938086	0.0102215	0.00833333	0.0026455	0.0115774	0.0200236
CGDMR	1836	Bd1-1	Bd1	14399300	14399499	199	hypo	0.0319149	0	0.954545	0	0	0	0	0.0228571	0.00943396	0.636364	0	0	0.0408163	0.016129	0.00576923	0	0.0139535	0	0.030303	0.00787402	0
CGDMR	1851	Bd1-1	Bd1	14627700	14628699	999	hyper	0.954515	0.00604595	0.00414938	0.012945	0.00547945	0.00564972	0.0152091	0.751958	0.00924703	0	0.0197368	0.0149502	0.00718391	0.0149648	0.117579	0.00541516	0.00559702	0.0123967	0.00909091	0.0349741	0.0977354
CGDMR	1853	Bd1-1	Bd1	14634700	14634899	199	hypo	0.137725	0.00684931	0.9125	0	0	0	0.0114943	0.013245	0.0045045	0.0137931	0	0.00819672	0.00552486	0	0	0.0070922	0.0172414	0	0.0180995	0	0.00793651
CGDMR	1858	Bd1-1	Bd1	14656200	14656699	499	hyper	0.945607	0.00829875	0	0.0143678	0.019337	0.0112721	0.0166667	0.417582	0.0790698	0.0597015	0.00641026	0.0241692	0.0633803	0.0926641	0.177778	0.141538	0.106383	0.029703	0.0779817	0.0928571	0.0896552
CGDMR	1859	Bd1-1	Bd1	14665100	14665499	399	hyper	0.896989	0.013468	0.015625	0.00543478	0	0.0190476	0.0216607	0.420749	0.102041	0.032967	0.0859375	0.0819672	0.102857	0.0558376	0.049896	0.0636183	0.0141844	0.0720721	0.0434783	0.0866142	0.0557851
CGDMR	1860	Bd1-1	Bd1	14676800	14677199	399	hyper	0.933673	0.00943396	0	0	0.02	0.038961	0.00490196	0.0184502	0.0117647	0	0.00458716	0.00373134	0.00413223	0.00657895	0.0194384	0.00743494	0.00436681	0.0140515	0.00178891	0.0124334	0.0025974
CGDMR	1869	Bd1-1	Bd1	14789000	14789499	499	hyper	0.907348	0.00711463	0.00403226	0.0111317	0.0160256	0.011713	0.00549451	0.201735	0.00486618	0	0.00588235	0.0136364	0.0245902	0.002457	0.00936768	0.00951374	0.00428265	0.00909091	0.00192308	0.0195312	0.00429184
CGDMR	1870	Bd1-1	Bd1	14829300	14829699	399	hypo	0.0149254	0.338129	0.95122	0.418033	0.0961538	0.720339	0.573333	0.0326797	0.193798	0.769231	0.163934	0.145631	0.549296	0.465812	0.00604839	0.0037037	0.00845666	0.00968523	0.0121654	0.0268336	0.0103397
CGDMR	1871	Bd1-1	Bd1	14833900	14834299	399	hypo	0	0.236842	0.942308	0	0	0.483333	0.441441	0	0.148649	0.481481	0	0	0.268293	0.413793	0.013369	0.244019	0.0671141	0.25	0	0.444043	0.315175
CGDMR	1874	Bd1-1	Bd1	14866100	14866299	199	hyper	0.911157	0.0290828	0.0163934	0	0	0.226974	0.0144404	0.526882	0.0020284	0.0285714	0	0.0153846	0.0700809	0.00302115	0.0182927	0.0128	0.0196078	0.00512821	0.0305677	0.0471698	0.00715991
CGDMR	1875	Bd1-1	Bd1	14868500	14868699	199	hypo	0.0422535	0	0.909091	0	0	0	0	0.0378788	0	0	0	0.0666667	0.0465116	0.0322581	0.0181818	0.00724638	0	0.0149254	0	0.00892857	0.0300752
CGDMR	1876	Bd1-1	Bd1	14876000	14876299	299	hyper	0.946996	0.151515	0.0322581	1	0.0588235	0	0.025	0.433048	0	0	0.2	0	0	0.0185185	0.0124611	0.00478469	0	0	0.02	0.00900901	0.0110497
CGDMR	1878	Bd1-1	Bd1	14909200	14909699	499	hyper	0.940493	0.0056338	0.0373832	0.010582	0.00699301	0.0140056	0.12	0.0226757	0.0152941	0.0138889	0.0160428	0.00566572	0.00860215	0.0106383	0.00515464	0.0042337	0.00564972	0	0.00436681	0.00622084	0.00306279
CGDMR	1887	Bd1-1	Bd1	14979100	14979299	199	hyper	0.870229	0.00877193	0	0	0	0.017341	0	0.168421	0	0	0	0	0	0	0	0.00584795	0.00884956	0.031746	0	0.0034965	0.00421941
CGDMR	1888	Bd1-1	Bd1	14984600	14984799	199	hyper	0.983607	0.79661	0	0.25	0.957447	0.688889	0	0.00653595	0	0.0263158	0	0.0192308	0	0	0.00201207	0.0133333	0.00561798	0	0.00956938	0	0
CGDMR	1889	Bd1-1	Bd1	14985000	14985299	299	hyper	0.890625	0.0952381	0.0229885	0	0.68	0.00571429	0.0113636	0.016129	0.0026738	0.0322581	0.0121951	0.00628931	0.00238663	0.00771208	0.0138249	0.0111111	0.00502513	0.0129032	0.0424242	0.00980392	0.0121359
CGDMR	1890	Bd1-1	Bd1	14986200	14986399	199	hyper	0.857143	0.84755	0	0	0.964286	0	0.01	0.592308	0.427239	0.0434783	0.0652174	0.588235	0.0408163	0	0.0867052	0.0208333	0.012987	0.0078125	0.0795455	0	0.0164474
CGDMR	1905	Bd1-1	Bd1	15113500	15113699	199	hyper	0.842975	0.0046083	0	0.04	0	0	0.0136986	0.208145	0.0116279	0	0	0	0.0289855	0	0.0124224	0	0	0.0277778	0	0	0.00684931
CGDMR	1906	Bd1-1	Bd1	15113800	15113999	199	hyper	0.942238	0.00854701	0	0.938272	0	0	0	0.586563	0	0.0222222	0.71028	0	0.00645161	0	0.0150479	0.00851064	0.0350877	0.0204082	0	0.00331126	0
CGDMR	1907	Bd1-1	Bd1	15114100	15114299	199	hyper	0.957659	0.917582	0.042735	0.966173	0.0159453	0.932314	0.927247	0.556263	0.114943	0.0144928	0.677966	0.0147059	0.165919	0.147059	0.00614035	0	0	0.00182482	0.00647948	0.0152381	0.00480769
CGDMR	1908	Bd1-1	Bd1	15114700	15116199	1499	hypo	0.0544413	0.911312	0.968652	0.265625	0.913633	0.965074	0.947231	0.0240601	0.329557	0.595	0	0.459559	0.355509	0.513224	0.00573951	0.0164647	0.0150616	0.0165837	0.015	0.016739	0.00901254
CGDMR	1911	Bd1-1	Bd1	15132200	15132499	299	hypo	0.0377358	0.789116	0.875	0.561224	0.0512821	0.894309	0.503268	0	0.410526	0.390244	0.267857	0	0.813187	0.247312	0.0273224	0.0115741	0	0.0227273	0.0103627	0.0293399	0.0127932
CGDMR	1923	Bd1-1	Bd1	15245400	15245799	399	hyper	0.765808	0.00653595	0.00925926	0	0	0	0.0185185	0.526119	0	0	0.05	0.0169492	0.0217391	0.0153846	0.0133779	0.0070922	0.00677201	0	0.0102564	0	0.00207469
CGDMR	1924	Bd1-1	Bd1	15246000	15246199	199	hyper	0.973958	0.00806452	0	0	0	0.0641026	0	0.796667	0	0	0	0.0526316	0.013245	0.039604	0.0119266	0.00255755	0.0151515	0.0195122	0.011236	0.00389105	0.011236
CGDMR	1926	Bd1-1	Bd1	15253400	15253999	599	hypo	0.00325733	0.97097	0.971979	0.986634	0.982363	0.971986	0.975831	0.0138249	0.453292	0.446494	0.292566	0.487896	0.313559	0.373529	0.00367985	0.00771208	0.00749766	0.00913937	0.0124729	0.00125786	0.00394672
CGDMR	1927	Bd1-1	Bd1	15267200	15267899	699	hypo	0.0063425	0.866667	0.956349	0.913607	0.790885	0.908692	0.971276	0.0183639	0.296875	0.462094	0.495868	0.255144	0.323171	0.447761	0.00405327	0.0102041	0.015984	0.0167598	0.00992282	0.00988468	0.00466321
CGDMR	1931	Bd1-1	Bd1	15300400	15300599	199	hypo	0	0.642857	1	0.646154	0.925373	0	0.793651	0.00851064	0.0240964	0	0	0	0	0.0211268	0.00770416	0.0219298	0	0.00995025	0	0.00347222	0.005
CGDMR	1945	Bd1-1	Bd1	15399300	15399499	199	hyper	0.825806	0.330049	0.0310078	0	0.70122	0.393846	0.757463	0.0300429	0.0149254	0.0175439	0.015625	0.0180723	0.00598802	0.0452675	0.00575816	0.00477327	0	0	0.00746269	0.0078329	0.00191939
CGDMR	1948	Bd1-1	Bd1	15424200	15424399	199	hypo	0	0.5	1	0	0	0.0434783	0	0	0.321429	0.35	0	0	0	0.0714286	0.00238663	0.00668896	0.00769231	0.0217391	0	0.00888889	0
CGDMR	1952	Bd1-1	Bd1	15428200	15428499	299	hyper	0.888889	0.705263	0.1	0.869565	0.688889	0.869919	0.504854	0.00369004	0	0	0	0	0.00714286	0.00729927	0.00735294	0.00299401	0.00543478	0	0.0211268	0.0116618	0.00255102
CGDMR	1955	Bd1-1	Bd1	15442700	15442999	299	hyper	0.971246	0.0606061	0.05	0.125	0.193548	0.0561798	0.0482759	0.663043	0	0	0	0.0740741	0	0.04	0.0216895	0.00625	0.00909091	0	0.024	0	0.00837989
CGDMR	1957	Bd1-1	Bd1	15461700	15461899	199	hypo	0.02	0.965608	0.970149	1	0.971698	0.993548	0.950758	0	0.718447	0.757576	0.178571	0.705357	0.0757576	0.579167	0.00970874	0.0100756	0.0108696	0	0.0185185	0.00358423	0.00853242
CGDMR	1962	Bd1-1	Bd1	15529000	15529199	199	hyper	0.938462	0.903846	0.0666667	0.857143	0.333333	0.375	0.653846	0.0121457	0.00480769	0.0163934	0.045977	0	0	0.00943396	0.00172414	0	0.00704225	0.0070922	0	0.00490196	0
CGDMR	1974	Bd1-1	Bd1	15599900	15600199	299	hyper	0.900901	0.0754717	0	0.181818	0.0384615	0.145455	0.411765	0.0243902	0.0112994	0	0	0	0.0291262	0	0.0136364	0.00828729	0.00406504	0.0144928	0	0.00588235	0
CGDMR	1977	Bd1-1	Bd1	15622200	15622899	699	hyper	0.918713	0.00854701	0.00485437	0.015674	0.0603908	0.029985	0.955013	0.0483743	0.00668896	0.022831	0.0103806	0.00763359	0.00716846	0.11729	0.00843254	0.00870322	0.00872093	0.0122549	0.00183823	0	0.00779037
CGDMR	1979	Bd1-1	Bd1	15623300	15623599	299	hyper	0.902326	0.069735	0.154812	0.010582	0.689655	0.0216867	0.945259	0.0383693	0.00743494	0.0223464	0	0.00815217	0	0.0275762	0.00884956	0.00520156	0.0148148	0.00485437	0.0108696	0.00744417	0.0125918
CGDMR	1981	Bd1-1	Bd1	15637200	15637399	199	hyper	0.906667	0	0	0.4	0.793103	0.130435	0.526316	0	0.025641	0.0222222	1	0.0454545	0	0	0.0103093	0	0	0	0	0	0
CGDMR	1987	Bd1-1	Bd1	15686500	15686899	399	hypo	0.0573888	0.545024	0.869863	0.366071	0.937843	0.597065	0.894097	0.0195759	0.0184211	0.0201613	0.003367	0.0364372	0.010929	0.0291971	0.0309073	0.0038059	0.00381194	0	0.00747384	0.00936968	0.00357995
CGDMR	1989	Bd1-1	Bd1	15698700	15698899	199	hypo	0	0.925926	0.888889	1	0.952381	0.228571	0.27027	0.0232558	0.047619	0	NA	0	0	0	0.00957854	0.0140187	0.0138889	0.0271493	0.00641026	0	0.00518135
CGDMR	1994	Bd1-1	Bd1	15750100	15750299	199	hyper	0.964912	0.418605	0	0.75	0.840909	0.785714	0.902439	0	0.0227273	0	0.0434783	0.0851064	0.0888889	0	0	0	0.0175439	0	0.00512821	0	0
CGDMR	1996	Bd1-1	Bd1	15761100	15761599	499	hypo	0.00572519	0.973576	0.969044	0.971338	0.956522	0.977308	0.95779	0	0.636364	0.761324	0.515966	0.578372	0.709393	0.419092	0.0034904	0.0315706	0.0331126	0.00810185	0.00802139	0.0341935	0.0172058
CGDMR	1997	Bd1-1	Bd1	15762500	15762699	199	hyper	0.857143	0	0	0	0.2	0	0	0.0131579	0	0.0243902	0	0.037037	0	0	0.00381679	0.00995025	0.00588235	0	0.01	0	0
CGDMR	1999	Bd1-1	Bd1	15771000	15771299	299	hyper	0.80791	0.852632	0.0461538	0.921053	0.653846	0	0.785714	0.00343643	0.00649351	0.0186916	0	0	0	0.00653595	0.00824176	0.00203252	0.0126582	0	0.00609756	0.00829875	0.00886918
CGDMR	2007	Bd1-1	Bd1	15798000	15798399	399	hypo	0.00862069	0.969116	0.977823	0.977574	0.963091	0.971767	0.976482	0.00564972	0.769231	0.716937	0.814956	0.807783	0.739229	0.799763	0.00557103	0.00661279	0.0104895	0.0209713	0.00918485	0.00852879	0.0139706
CGDMR	2008	Bd1-1	Bd1	15806000	15806199	199	hyper	0.866667	0.0433071	0.0344828	0.550265	0.00680272	0.0327869	0.986014	0.653333	0.0111732	0	0.156716	0.0218978	0.0344828	0.49884	0.0176471	0	0	0.00257069	0.00896861	0.00954654	0.00716204
CGDMR	2010	Bd1-1	Bd1	15827700	15827999	299	hypo	0.0636364	0.965	0.983051	0	0.984536	0.956656	0	0.0463918	0.151899	0.430233	0	0.118227	0.117302	0.0330579	0.0148515	0.0177165	0.0111732	0	0.00420168	0.0025641	0
CGDMR	2012	Bd1-1	Bd1	15829100	15829299	199	hypo	0	0.95	1	NA	0.948148	0.968254	0	0.0357143	0.920168	0.787879	NA	0.964029	0.925926	0	0	0.00308642	0.00378788	NA	0.00227273	0.0126783	0.00438597
CGDMR	2019	Bd1-1	Bd1	15866800	15866999	199	hyper	0.866667	0.0606061	0	0.030303	0	0.037037	0.0273973	0.0307692	0	0.0425532	0	0	0	0	0.00546448	0.00425532	0	0	0	0	0.00531915
CGDMR	2035	Bd1-1	Bd1	16000200	16000499	299	hypo	0.00862069	0.913043	0.975	0.875	0	0	0.949275	0.0671937	0.670588	0.784314	0.788732	0	0	0.768293	0.005386	0.00894188	0.028436	0.00571429	0	0	0.00768246
CGDMR	2036	Bd1-1	Bd1	16000600	16000999	399	hypo	0.00769231	0.58011	1	0.875	0	0	0.900685	0.00833333	0.673401	0.619718	0.451613	0	0	0.804642	0.0144928	0.0324232	0.0222222	0.0897436	0.05	0.0122699	0.0172043
CGDMR	2037	Bd1-1	Bd1	16004100	16004599	499	hypo	0.00830565	0.00765306	0.877323	0.0155039	0.0160643	0.0192771	0.00566038	0.00607903	0.0324074	0.0789474	0.0322581	0.0137931	0.0307018	0.0210526	0.00827068	0.00240096	0.0125786	0.00749064	0.0116861	0.0121951	0.00961539
CGDMR	2039	Bd1-1	Bd1	16006300	16006599	299	hypo	0.0145985	0.957746	0.956731	0.0188679	0.959781	0.0186916	0.0233918	0	0.50495	0.559322	0	0.629393	0.0344828	0.0075188	0.00705882	0.0166436	0.00972447	0	0.00761905	0.00520833	0.00265252
CGDMR	2044	Bd1-1	Bd1	16066000	16066199	199	hypo	0	0.05	0.826087	NA	0	0	0	0	0	0.142857	0	0	0.285714	0	0	0	0.0384615	0	0	0	0
CGDMR	2045	Bd1-1	Bd1	16068700	16069099	399	hyper	0.926702	0.0331754	0.0384615	0.0615385	0	0	0.0116959	0.666667	0.0196078	0.0172414	0	0.0397351	0	0.016129	0.0174588	0.00191571	0.0208333	0	0	0.0133333	0.00914634
CGDMR	2048	Bd1-1	Bd1	16086000	16086299	299	hypo	0.00847458	0.0120482	0.848485	0.119048	0	0.0212766	0	0.03125	0.00719425	0.612245	0.0547945	0	0	0	0.00537634	0.00645161	0.0131579	0.00873362	0	0	0.00890869
CGDMR	2049	Bd1-1	Bd1	16088400	16088599	199	hypo	0	0.254545	0.962264	0.25	0.326531	0.9	0.764706	0	0	0	0	0	0	0.125	0.0107527	0.00518135	0.0172414	0	0.0844156	0.00480769	0.00865801
CGDMR	2055	Bd1-1	Bd1	16109700	16110499	799	hypo	0.0149254	0.966128	0.955166	0.973103	0.968645	0.963149	0.962338	0.00932401	0.670266	0.644592	0.776427	0.709158	0.778192	0.767192	0.0126829	0.0106655	0.00960512	0.00869565	0.00281426	0.0156775	0.0465549
CGDMR	2059	Bd1-1	Bd1	16138900	16139099	199	hyper	0.797571	0.0114504	0.0140845	0	0.0193237	0	0	0.0882353	0.0138889	0	0	0	0.0215054	0	0.018018	0.0058651	0.0102041	0	0.00769231	0	0.0112782
CGDMR	2062	Bd1-1	Bd1	16166600	16166799	199	hypo	0.025	0.0215827	0.83871	0.0188679	0.0428571	0.0204082	0.345588	0	0.0125	0.219512	0.0357143	0.0107527	0.0235294	0.126437	0.0197368	0.0049505	0.0340426	0	0.00465116	0.0126183	0.0375276
CGDMR	2071	Bd1-1	Bd1	16336100	16336299	199	hypo	0.135593	0.747748	0.988235	0.957265	0.913333	0.879518	0.94898	0.0275229	0.564516	0.841121	0.78022	0.772152	0.739796	0.635628	0.118785	0.285714	0.237624	0.334204	0.185106	0.244681	0.329041
CGDMR	2076	Bd1-1	Bd1	16415200	16415499	299	hypo	0.0275229	0.949672	0.969136	0.964539	0.95082	0.966321	0.956311	0.00773196	0.0136816	0.0218978	0.0211864	0.0117955	0.0362538	0.0127841	0	0.00949367	0	0.00359712	0.0162413	0.00656455	0.00209644
CGDMR	2089	Bd1-1	Bd1	16528600	16528999	399	hypo	0.0158103	0.769939	0.913295	0.712963	0.841727	0.816832	0.919192	0.00956938	0.34322	0.462185	0.153846	0.336634	0.25	0.335463	0.00522876	0.0163148	0.0200617	0.0162338	0.0102249	0.0182119	0.00597015
CGDMR	2090	Bd1-1	Bd1	16536000	16536199	199	hypo	0.0240964	0.946488	0.857143	0.992	0.975904	0.953678	0.985663	0.0547945	0.518135	0.309524	0.536913	0.506329	0.547325	0.5	0	0.00582751	0.016	0.0131332	0.0172084	0.00596422	0.00473934
CGDMR	2093	Bd1-1	Bd1	16602700	16602899	199	hyper	0.947368	0.520833	0	0.960526	0.553846	0.590909	0.931507	0.552083	0.188679	0.142857	0.71831	0.27027	0.259259	0.80597	0.0296128	0.00775194	0	0.0361111	0.0274725	0.0070922	0.0210843
CGDMR	2097	Bd1-1	Bd1	16665600	16665799	199	hypo	0	1	1	1	1	1	1	0	0.666667	0.5	0.5	0.6	0.5	0.714286	0	0	0	0	0.0212766	0	0.025
CGDMR	2098	Bd1-1	Bd1	16675400	16675699	299	hypo	0.0134228	0.00813008	0.923077	0	0	0	0	0.0222222	0.0353982	0.0188679	0.142857	0.025641	0.0353982	0.0147059	0.00277008	0.00673401	0.0107817	0	0.00909091	0.0149254	0.0105263
CGDMR	2102	Bd1-1	Bd1	16691400	16691899	499	hypo	0.0161812	0.845018	0.927342	0.886767	0.884916	0.916505	0.891714	0.0192678	0.321088	0.414439	0.230483	0.538941	0.47619	0.514612	0.0152838	0.0247383	0.0152801	0.0180505	0.0147059	0.0246792	0.0326531
CGDMR	2103	Bd1-1	Bd1	16692000	16692199	199	hypo	0.0052356	0.721754	0.876033	0.872964	0.807786	0.756184	0.871224	0.0169492	0.145455	0.221519	0.298701	0.234783	0.257862	0.317259	0.0243902	0.0066335	0.00340136	0.0176056	0.0146699	0.0200364	0.0122616
CGDMR	2104	Bd1-1	Bd1	16693700	16693899	199	hypo	0.0386997	0.0138067	0.854167	0.0272109	0.120482	0.0174129	0.0229358	0.037037	0.0410448	0.193676	0	0.0337079	0.0378151	0.0232558	0.022605	0.0475483	0.0233723	0.00823045	0.0343137	0.027933	0.024961
CGDMR	2106	Bd1-1	Bd1	16722400	16722699	299	hypo	0.0451128	0.920904	0.944444	0.724138	0.441176	0.909722	0.884848	0	0.238095	0.528302	0.16	0.147059	0.215385	0.371681	0.00950119	0.0056101	0	0.00431035	0.00813008	0.0211538	0.0015456
CGDMR	2107	Bd1-1	Bd1	16723700	16723899	199	hypo	0.134831	0.910112	0.890909	0.612245	0.711538	0.557143	0.87234	0.0833333	0.478261	0.392857	0.142857	0.619048	0.25	0.46	0.0168067	0.00544465	0.0170213	0.0135747	0.033195	0.0132979	0.00179533
CGDMR	2114	Bd1-1	Bd1	16767000	16767699	699	hypo	0.00514139	0.92415	0.972556	0.932642	0.812785	0.92702	0.933333	0.00459418	0.720952	0.821359	0.693846	0.685254	0.691622	0.736355	0.0100865	0.0246517	0.0146667	0.0129072	0.0255741	0.0268798	0.020916
CGDMR	2115	Bd1-1	Bd1	16770400	16770599	199	hypo	0.08	0.977273	0.840909	0.885714	0.933333	0.972973	0.951923	0	0	0.0510204	0	0	0.00704225	0.021978	0	0.02	0	0.00584795	0	0.0134529	0.00369004
CGDMR	2120	Bd1-1	Bd1	16845200	16845999	799	hyper	0.96024	0.0135823	0.0021692	0.00653595	0.0136816	0.00829493	0.0106289	0.585627	0.00555042	0.0112867	0.00700935	0.0115979	0.0107738	0.011236	0.0101678	0.00766962	0.00148148	0.0030303	0.00601375	0.00616861	0.00687758
CGDMR	2121	Bd1-1	Bd1	16846500	16847199	699	hyper	0.937778	0.0401961	0.0152174	0.0320285	0.0369181	0.345806	0.148295	0.703635	0.0248918	0.0129534	0.0230126	0.028169	0.172783	0.0664062	0.0103986	0.0214106	0.00924214	0.0247117	0.0177515	0.0199052	0.009113
CGDMR	2124	Bd1-1	Bd1	16885700	16885999	299	hypo	0.0110193	0.368421	0.867725	0.0691489	0.102649	0.674888	0.142553	0.0202703	0.167331	0.485714	0.040404	0.0890411	0.244541	0.0867925	0.0145985	0.137871	0.116071	0.160448	0.158242	0.204159	0.12091
CGDMR	2125	Bd1-1	Bd1	16909600	16911299	1699	hypo	0.021575	0.975536	0.977108	0.972334	0.951018	0.967806	0.968876	0.0137065	0.686198	0.701285	0.752664	0.743741	0.684262	0.685409	0.0121225	0.00941338	0.0147977	0.012811	0.0144738	0.0103283	0.0133571
CGDMR	2130	Bd1-1	Bd1	16974900	16975099	199	hypo	0	0.787234	0.929825	0.823529	0.810345	0.758621	0.899225	0	0.608696	0.625	0.529412	0.617647	0.916667	0.816901	0.0144928	0.0735294	0.161017	0.0163934	0.0869565	0.0155039	0.199063
CGDMR	2132	Bd1-1	Bd1	17013400	17013599	199	hyper	0.93865	0.958904	0	1	0.5	0.789474	1	0.787709	0.728571	0	0.0526316	0	0	0.0212766	0.00792393	0.00859599	0	0	0	0.0188679	0.00952381
CGDMR	2133	Bd1-1	Bd1	17016500	17016799	299	hyper	0.894118	0.45	0	NA	0.444444	0.8	0.454545	0.638522	0	0	0	0	0.0142857	0.0294118	0.00684505	0	0.00740741	0	0	0	0.00324675
CGDMR	2134	Bd1-1	Bd1	17017100	17017299	199	hyper	0.903382	0.0358423	0	0.333333	0.0070922	0.228188	0.0416667	0.509804	0	0	0.0526316	0	0.162162	0.0140845	0.00920245	0.00473934	0	0	0.00595238	0.00938967	0.0070922
CGDMR	2135	Bd1-1	Bd1	17017500	17017799	299	hyper	0.935657	0.0148305	0	0	0.00598802	0.0617284	0.00361011	0.511706	0.00609756	0.03125	0	0.00454546	0.038961	0.0152284	0.00543478	0.0070922	0	0.0227273	0	0	0.0136986
CGDMR	2141	Bd1-1	Bd1	17069400	17069799	399	hyper	0.970522	0.00940439	0.00813008	0	0.011976	0.00492611	0.00436681	0.477733	0.00813008	0.00675676	0	0	0	0.010453	0.00707547	0.00196078	0	0	0	0.00351494	0.00797872
CGDMR	2144	Bd1-1	Bd1	17073200	17073799	599	hypo	0.0193741	0.0156815	0.984	0.986234	0.974884	0.978702	0.958463	0.0207469	0.00301205	0.704545	0.803728	0.755556	0.745645	0.760316	0.00739827	0.0083632	0.0547397	0.0119826	0.0614267	0.0379494	0.0729353
CGDMR	2145	Bd1-1	Bd1	17073900	17074099	199	hypo	0	0.357143	1	1	1	1	1	0	0	0	0.8	0.75	0.333333	0.521739	0.0210526	0	0	0	0.0333333	0.0114943	0
CGDMR	2146	Bd1-1	Bd1	17076400	17076599	199	hypo	0.0909091	0.911765	1	0.943662	1	0.952381	0.971429	0	0	0.615385	0.923077	0.945455	0.686567	0.480315	0.0409836	0.0070922	0	0.0358566	0.00900901	0	0.0176056
CGDMR	2148	Bd1-1	Bd1	17088500	17089299	799	hypo	0.00925926	0.949777	0.990521	0.98731	0.988746	0.974093	0.52446	0.00617284	0.62543	0.649606	0.677273	0.687204	0.685673	0.165308	0.0052356	0.0556793	0.0347826	0.00692841	0.0573099	0.0487964	0.00873908
CGDMR	2149	Bd1-1	Bd1	17091800	17091999	199	hypo	0	0.981481	1	1	0.944444	0.981818	0.923077	0.00847458	0.911111	0.916667	0.892857	0.866667	0.833333	0.930769	0	0.00806452	0.0153846	0.0123457	0	0.00636943	0.0115274
CGDMR	2152	Bd1-1	Bd1	17116500	17116699	199	hypo	0.142857	0	1	NA	1	0.75	0.592593	0	0	0	NA	0	0.047619	0	0.00651466	0.0163934	0.0139535	NA	0	0	0.00657895
CGDMR	2155	Bd1-1	Bd1	17133600	17134199	599	hyper	0.92916	0.00828157	0	0.0350877	0.00684931	0.0149254	0.0137615	0.234756	0.0107143	0.0103093	0	0.0151515	0.00943396	0.00390625	0.0201342	0.00970874	0.00393701	0	0.0164835	0	0
CGDMR	2157	Bd1-1	Bd1	17160400	17160899	499	hypo	0.0392377	0.95316	0.971831	0.0106762	0.951242	0.968061	0.977228	0.0436681	0.405034	0.232082	0	0.286239	0.393682	0.577192	0.0422386	0.0737659	0.0070028	0	0.0058548	0.00396825	0.0698529
CGDMR	2164	Bd1-1	Bd1	17254600	17254799	199	hypo	0.0652174	0.8	1	0.928571	0.828571	0.868132	0.814815	0	0	0.25	0	0.153846	0.137931	0.107143	0.00496689	0.00323625	0.0167364	0.0143885	0.0503597	0.0103359	0.00326797
CGDMR	2169	Bd1-1	Bd1	17275000	17275499	499	hypo	0.00183823	0	0.965409	0.0111732	0.920228	0.945245	0.947047	0.0181347	NA	0.0287356	0	0.0650759	0.138462	0.103789	0.00176056	0	0.00149925	0	0.00313234	0.0239163	0.00761697
CGDMR	2170	Bd1-1	Bd1	17276800	17276999	199	hypo	0	0.192308	0.886792	0.730769	0.864407	0.947368	0.948718	0	0	0.0322581	0.625	0.0322581	0.12	0.097561	0	0	0.0411765	0	0.0358974	0.00990099	0.0674157
CGDMR	2173	Bd1-1	Bd1	17290800	17290999	199	hyper	0.958872	0.902576	0	0.0363636	0.574837	0.00840336	0.00884956	0.424359	0.639524	0.0125	0.0405405	0.0570265	0.0235294	0.00864553	0.0209974	0.0146879	0	0	0.0429043	0.00597015	0.00821355
CGDMR	2175	Bd1-1	Bd1	17291500	17292299	799	hyper	0.979592	0.953065	0.0201511	0.0225564	0.0119474	0.00690449	0.0181504	0.749049	0.781591	0.00473934	0.00913242	0.0320513	0.0210773	0.0593081	0.0140118	0.0193924	0.0115274	0.00373134	0.0189504	0.0225564	0.0592441
CGDMR	2183	Bd1-1	Bd1	17349700	17350399	699	hypo	0.0235525	0.960359	0.975069	0.0173913	0.967742	0.971196	0.968579	0.0152144	0.607216	0.731855	0.0294118	0.721779	0.709677	0.733187	0.00893655	0.00726469	0.0102348	0.00411523	0.013588	0.0107011	0.0125261
CGDMR	2184	Bd1-1	Bd1	17363600	17363899	299	hyper	0.943574	0.0632411	0.0306122	0.874372	0.923759	0.959004	0.94433	0.275862	0.0581395	0.0526316	0.468354	0.45679	0.404682	0.438596	0.0308748	0.0101266	0.0121212	0.0636183	0.0377358	0.0119048	0.0305851
CGDMR	2189	Bd1-1	Bd1	17392800	17393299	499	hyper	0.878289	0.818713	0.0130719	0	0.864964	0.00763359	0	0.669145	0.744361	0.0103093	0.05	0.589595	0.0147059	0.0226244	0.0157593	0.0102828	0.00219298	0.00888889	0.0212766	0.00520156	0.00389105
CGDMR	2193	Bd1-1	Bd1	17452600	17452899	299	hypo	0.0357143	0	0.970588	0.235294	0.774194	0.175	0	0.0325203	0	0.455882	0	0.222222	0.0454545	0	0.00816326	0	0.00847458	0	0	0	0
CGDMR	2206	Bd1-1	Bd1	17529900	17530099	199	hypo	0	0.563636	0.795455	0.714286	0.804348	0.707692	0.8125	0	0.318182	0.304348	0.5	0.758621	0.46875	0.590909	0	0.012766	0.0236686	0.0869565	0.0674847	0.0807175	0.0422961
CGDMR	2208	Bd1-1	Bd1	17545800	17545999	199	hypo	0.126984	0.228571	0.911111	0	0.961039	0	0	0.113636	0.0606061	0.555556	0	0.684932	0	0	0.0126582	0.0217391	0.0204082	0	0.0573951	0	0.0126582
CGDMR	2209	Bd1-1	Bd1	17547900	17548699	799	hypo	0.014218	0.966636	0.965517	0.972103	0.92467	0.98351	0.964912	0.018732	0.565489	0.457726	0.774951	0.382799	0.559889	0.640955	0.00746269	0.00749465	0.0107004	0.018012	0.0141928	0.0183398	0.0108368
CGDMR	2212	Bd1-1	Bd1	17549400	17549899	499	hypo	0.0245902	0.963158	1	1	0.990431	0.989474	0.981273	0.00680272	0.973333	0.885246	0.977346	0.953846	0.912664	0.919118	0.00636943	0.0122699	0.0112867	0.0226415	0.0235546	0.0103806	0.0129969
CGDMR	2213	Bd1-1	Bd1	17556800	17556999	199	hypo	0.0409357	0.850467	0.955224	0.181818	0.607143	0.225564	0.95045	0.0155039	0.382716	0.381818	0	0.138889	0.0803571	0.551515	0.0043573	0.0180505	0.0193237	0	0.00921659	0.00990099	0.0114504
CGDMR	2217	Bd1-1	Bd1	17612800	17612999	199	hyper	0.881857	0.00609756	0.00367647	0.0177515	0.0393701	0	0.00997506	0.309091	0.00662252	0.00854701	0	0	0	0.0238095	0.00735294	0	0.00716846	0	0	0	0.00287356
CGDMR	2218	Bd1-1	Bd1	17673800	17674099	299	hypo	0.03125	0.547486	0.958333	0.212121	0.648936	0.0408163	0.833333	0.0555556	0.125	0.181818	0.176471	0.148148	0.0273973	0.15942	0.0120482	0.0273038	0.0188679	0.0243902	0.0246914	0.00558659	0.027907
CGDMR	2223	Bd1-1	Bd1	17730000	17730199	199	hypo	0.0113636	0.818182	0.857143	0.193548	0.794872	0.888889	0.97561	0.019802	0	0.030303	0	0	0.0126582	0	0.00911854	0	0.0243902	0.00840336	0	0.00416667	0.0123457
CGDMR	2226	Bd1-1	Bd1	17734100	17734299	199	hyper	0.894737	0	0	0	0	0	0	0.0363636	0.025	0	0	0.027027	0	0	0.00621118	0.00793651	0	0	0	0	0
CGDMR	2230	Bd1-1	Bd1	17776500	17777299	799	hyper	0.978426	0.0224877	0.0357143	0.033241	0.0815265	0.033123	0.0557692	0.575835	0.00583942	0.0193548	0.0186567	0.0181452	0.0136719	0.0106809	0.0133179	0.00181818	0.0143113	0.00720721	0.0126103	0.00307692	0.00393701
CGDMR	2232	Bd1-1	Bd1	17836100	17836299	199	hypo	0.0344828	0.185185	0.9	0.727273	0.935065	0.181818	0.28	0	0	0.117647	0	0.533333	0.0666667	0	0.0318471	0	0.0853659	0.0338164	0.102564	0.0133333	0.0307692
CGDMR	2235	Bd1-1	Bd1	17870300	17870599	299	hypo	0	0.232759	1	0.037037	0.0597015	0	0.0243902	0	0.0344828	0.0701754	0	0	0	0	0.00431035	0.0140845	0.0108696	0	0	0	0.0238095
CGDMR	2239	Bd1-1	Bd1	17889600	17889899	299	hyper	0.94321	0.00689655	0.00649351	0.0046729	0	0.011236	0.00280112	0.303318	0.00740741	0.021978	0.012987	0	0.0107527	0.00884956	0.00591716	0	0.011583	0	0	0.011236	0.0046083
CGDMR	2241	Bd1-1	Bd1	17912800	17913099	299	hypo	0	0.0102041	0.979592	0	0	0	0.0425532	0.0238095	0.0254237	0.75641	0.0588235	0	0.12	0.0517241	0.00269542	0.00784314	0.00492611	0.00952381	0.0178571	0	0
CGDMR	2242	Bd1-1	Bd1	17914100	17914299	199	hypo	0.0408163	0.285714	1	0.5	1	0.8	0.4	0.0588235	0	0	NA	NA	0	0	0.00492611	0	0	0	0	0	0
CGDMR	2244	Bd1-1	Bd1	18014300	18014499	199	hypo	0.106481	0.542857	0.939394	0.710059	0.0909091	0.544554	0.0330189	0.0204918	0.0819113	0.40458	0.18254	0.01875	0.0769231	0.015	0.00814111	0.00657895	0.00985222	0.0120482	0.00878735	0.0161943	0.0125786
CGDMR	2246	Bd1-1	Bd1	18084600	18084899	299	hyper	0.775	0	0	0	0.83871	0.910714	0.958333	0.188811	0	0.0277778	0.0666667	0.428571	0.309735	0.510204	0.0508475	0.0240964	0	0	0	0.0123762	0.0157233
CGDMR	2248	Bd1-1	Bd1	18098400	18098599	199	hypo	0.015873	0.477778	0.984127	0.425926	0.0641026	0.178571	0.0789474	0.0491803	0.0645161	0.854167	0.127273	0	0	0.0769231	0.0106952	0	0	0.00877193	0	0.0576923	0.0607477
CGDMR	2252	Bd1-1	Bd1	18164900	18165099	199	hypo	0.00469484	0.00628931	0.914634	0	0	0.0128205	0.0326087	0.0352941	0	0.190476	0	0	0.0588235	0	0	0	0	0	0	0	0
CGDMR	2256	Bd1-1	Bd1	18222800	18223399	599	hyper	0.967607	0.0121654	0	0.00990099	0.00197628	0.00875273	0.00398406	0.704248	0.0115702	0.00892857	0	0	0.00813008	0.00396825	0.0435967	0.0108959	0.0105541	0.00858369	0.0053286	0.00628931	0.00813008
CGDMR	2260	Bd1-1	Bd1	18254800	18254999	199	hypo	0.04	1	1	NA	1	0.666667	1	0.0192308	0.0588235	0	0	0	0	0	0.00476191	0	0.0113636	0	0	0	0
CGDMR	2263	Bd1-1	Bd1	18311000	18311199	199	hypo	0.00564972	0.951456	0.965812	0.981132	0.981481	0.889381	0.935345	0	0.65873	0.514286	0.472727	0.734694	0.616	0.651163	0.0122324	0.0621572	0.00986842	0.035461	0.0216867	0.0227642	0.0130081
CGDMR	2268	Bd1-1	Bd1	18349300	18349699	399	hypo	0.0295359	0.730594	0.979866	0.873156	0.898026	0.897436	0.782301	0.0215054	0.569364	0.824	0.699605	0.729792	0.614334	0.622727	0.0053135	0.00728155	0.0078329	0.00267738	0.0112528	0.0127315	0.0131125
CGDMR	2274	Bd1-1	Bd1	18436900	18437099	199	hypo	0.0138889	0.413793	0.913043	0	0.8	0.761905	0.037037	0	0.075	0.35	0	0.625	0.030303	0.0227273	0.0159574	0.0216216	0	0	0	0.0465116	0.0112994
CGDMR	2276	Bd1-1	Bd1	18459400	18459599	199	hyper	0.854839	0.294118	0	0.030303	0.659091	0.2	0.350877	0.0218978	0	0	0	0	0	0.0147059	0.00340715	0.00511509	0.00809717	0	0.00436681	0	0.0111111
CGDMR	2294	Bd1-1	Bd1	18691700	18692099	399	hypo	0	0.892617	1	NA	0.91195	0.953333	0.956522	0.0107527	0.586375	0.758621	NA	0.59661	0.60274	0.803846	0.010101	0.0242165	0.026455	NA	0.00648298	0.013986	0.0120724
CGDMR	2295	Bd1-1	Bd1	18692300	18692699	399	hypo	0	0.97931	0.971429	NA	0.666667	0.984127	0.961538	0	0.818697	0.786207	NA	0	0.524194	0.805492	0	0.00824742	0.0183727	NA	0	0	0.00436681
CGDMR	2301	Bd1-1	Bd1	18747500	18747699	199	hypo	0.0166667	0.507812	0.875	0.7	0.84	0	0.0547945	0.00760456	0.0137457	0	0.0606061	0	0.00854701	0.0217391	0.0165563	0.0118577	0	0	0	0.024	0
CGDMR	2302	Bd1-1	Bd1	18750500	18750799	299	hypo	0.0127389	0.928	1	0	0.884615	0.932515	0.00724638	0.0147601	0.794408	0.757009	0.0490196	0.716418	0.765385	0.0210084	0.00936037	0.0119048	0.0264706	0	0.0116279	0.00563698	0.00738007
CGDMR	2303	Bd1-1	Bd1	18750900	18751099	199	hypo	0	0.6	1	0	NA	1	0.117647	0	0.411765	0.611111	0	NA	0.75	0.0833333	0	0.01875	0	0	NA	0	0
CGDMR	2304	Bd1-1	Bd1	18806900	18807099	199	hypo	0	NA	0.8	NA	0	0.583333	0	0	NA	0.5	NA	0	0.166667	0	0.0169492	NA	0	NA	0	0.0517241	0
CGDMR	2308	Bd1-1	Bd1	18846300	18846499	199	hypo	0.047619	0.890411	0.836364	0.888889	0.9	0.897436	0.814286	0.0136986	0.176471	0.0961538	0.0434783	0.233333	0.142857	0.161765	0.0128617	0.00993378	0.0266667	0	0.0129032	0.0174927	0.003861
CGDMR	2311	Bd1-1	Bd1	18883300	18883499	199	hypo	0.111111	0.116667	1	0.761905	0.0833333	0.939394	0.0847458	0.103774	0.168831	0.851064	0.781818	0.0849057	0.310345	0.119403	0.00758725	0.00719425	0.00696864	0.00316456	0.0118577	0.00767754	0.00621118
CGDMR	2314	Bd1-1	Bd1	18918000	18918699	699	hyper	0.945993	0.0250232	0.0231959	0.0275862	0.0367232	0.0306122	0.0393305	0.675676	0.027027	0.00819672	0.0547945	0.0837209	0.0450098	0.0993691	0.0174014	0.0120773	0.0105263	0.0237467	0.00624025	0.0155172	0.0147186
CGDMR	2315	Bd1-1	Bd1	18941200	18941699	499	hypo	0.0154799	0.921512	0.977778	0.947115	0.956954	0.95466	0.427632	0.00378788	0.622691	0.673759	0.635965	0.763333	0.691176	0.336043	0.00441826	0.0105882	0.0267062	0.0193548	0.0230041	0.0166667	0.0226481
CGDMR	2316	Bd1-1	Bd1	18956500	18956999	499	hyper	0.9225	0.0100806	0.0158103	0.0131579	0.00854701	0.00956938	0.0137525	0.597315	0	0	0.00884956	0.00613497	0.00518135	0.00292398	0.00544218	0.00798722	0.00269542	0	0.00869565	0.0115207	0.00501253
CGDMR	2332	Bd1-1	Bd1	19063100	19063299	199	hypo	0	0	1	NA	NA	0.947368	0.8	0	0	0	NA	NA	0	0	0	0.0277778	0	0	0	0	0.047619
CGDMR	2334	Bd1-1	Bd1	19084000	19084199	199	hypo	0.0628931	0.686567	0.898734	0.642857	0.83871	0.611842	0.15	0.00961539	0.0617284	0.234043	0.0357143	0.2	0.0430108	0	0.00217391	0.00906344	0.0307018	0	0.00795756	0.00842697	0
CGDMR	2336	Bd1-1	Bd1	19088700	19089099	399	hypo	0.00595238	0	0.951807	0	0.0384615	0	0	0.00657895	0	0.466667	0	0	0.0116279	0.00869565	0.00610376	0.00115075	0.0018315	0.00273224	0.00236407	0.0147679	0.00153374
CGDMR	2340	Bd1-1	Bd1	19093500	19093799	299	hypo	0.0214286	0.703704	0.982456	0	0.962025	0.0178571	0.0144928	0	0.0315789	0.037037	NA	0.1875	0	0	0.0074813	0.0302376	0.00588235	0	0.010101	0.00714286	0.00552486
CGDMR	2341	Bd1-1	Bd1	19096800	19096999	199	hyper	0.867647	0	0.0185185	0	0	0.010101	0.010101	0.35119	0	0	0	0	0.0144928	0.0307692	0.00422833	0.014881	0	0.0461538	0	0	0.0229885
CGDMR	2343	Bd1-1	Bd1	19103200	19103499	299	hyper	0.916667	0.851675	0.0116279	0.858407	0.532258	0.77459	0.97318	0.0192308	0.0506329	0	0.0571429	0.0206897	0.00943396	0.0134529	0.0137615	0.0232558	0.00429184	0.0147601	0.0140056	0.00473934	0.0143084
CGDMR	2344	Bd1-1	Bd1	19103800	19103999	199	hyper	0.952941	0.731959	0	0.93617	0.734694	0.84507	0.982301	0.154762	0.0263158	0	0.0222222	0.166667	0.0526316	0.266667	0.00687285	0.00982318	0	0	0.0143369	0.00652528	0.00696864
CGDMR	2345	Bd1-1	Bd1	19104100	19104299	199	hyper	0.729282	0	0	0.666667	0	0.955696	0.971831	0.0392157	0.0263158	0.0169492	0.047619	0	0.0336134	0.0240964	0.0144928	0	0.00246914	0	0.00584795	0.00427808	0.00609756
CGDMR	2349	Bd1-1	Bd1	19135900	19136099	199	hyper	0.779167	0.313364	0	0.522388	0.664773	0.757732	0.737805	0.0165289	0	0	0	0.0243902	0.0380952	0	0.00746269	0.0102041	0	0.0172414	0	0	0.01
CGDMR	2352	Bd1-1	Bd1	19166000	19166299	299	hypo	0	0.933649	0.941176	0.948148	0.978261	0.942478	0.932862	0.0408163	0.555556	0.622642	0.670886	0.767584	0.628352	0.632353	0.0145985	0.0396975	0.0376569	0.0455487	0.0284211	0.0665927	0.0547945
CGDMR	2353	Bd1-1	Bd1	19168200	19168599	399	hypo	0	0.905109	0.984496	0.957627	0.93871	0.94431	0.967667	0.00502513	0.480519	0.587786	0.659919	0.606349	0.573363	0.58642	0.0143979	0.00889802	0.0119332	0.00534759	0.0055371	0.0178808	0.00785973
CGDMR	2355	Bd1-1	Bd1	19178200	19178399	199	hypo	0.030303	0.258065	0.925926	0.583333	0.733333	0.735294	0.785714	0.037037	0.0606061	0.136364	0	0.166667	0.405405	0.355556	0.00884956	0.00995025	0.0875	0.0604027	0.0290828	0.0897436	0.0456432
CGDMR	2356	Bd1-1	Bd1	19180400	19180799	399	hyper	0.892977	0.004329	0.016129	0	0.0140845	0	0.012931	0.0195312	0.00520833	0.00990099	0	0	0.00675676	0.00478469	0.0165913	0.00201207	0.00406504	0.0217391	0.00526316	0.00842697	0.00379507
CGDMR	2375	Bd1-1	Bd1	19348900	19349099	199	hypo	0.0232558	0.5	0.896552	0.833333	0.833333	0.0740741	0.125	0.0116279	0.016	0	0	0	0	0.0188679	0.00543478	0.00261097	0	0.015625	0.00694444	0	0.00343643
CGDMR	2377	Bd1-1	Bd1	19353500	19353699	199	hypo	0.0137931	0.0517241	0.864583	0	0	0.0566038	0.0315789	0	0	0.615385	0	0	0	0.0108696	0.0094162	0.00858369	0.270142	0	0	0	0.0297619
CGDMR	2378	Bd1-1	Bd1	19368800	19368999	199	hypo	0.0483871	0.131783	0.886364	0.357143	0.37037	0.173913	0.125	0.0192308	0.134831	0.945946	0.512195	0.475	0.166667	0.214286	0.04	0.15415	0.168539	0.137931	0.0841121	0	0.0989011
CGDMR	2383	Bd1-1	Bd1	19394700	19395099	399	hypo	0.00645161	0.900901	0.953488	0.957746	0.909953	0.485075	0.323171	0	0.0111111	0.0447761	0.0461538	0.00862069	0	0	0.00821355	0.0129534	0.0254777	0.00990099	0.00439239	0.009375	0.0118577
CGDMR	2386	Bd1-1	Bd1	19449100	19449299	199	hypo	0.00895522	0.0182648	0.98913	0.00952381	0.952	0.910714	0.0145631	0.0123457	0.00649351	0.739726	0	0.678161	0.354167	0	0.0184615	0	0.0220994	0	0.031339	0.0112994	0.0213904
CGDMR	2390	Bd1-1	Bd1	19469800	19469999	199	hypo	0	0.28	0.8	0	0.130435	0.346154	0.491525	0.02	0.0140845	0	0	0.0416667	0.0178571	0.0111111	0.0146819	0.00546448	0.0113208	0	0	0	0.0109409
CGDMR	2403	Bd1-1	Bd1	19577900	19578599	699	hyper	0.976355	0.941473	0.00392157	0.969211	0.0196078	0.960991	0.972182	0.499449	0.650926	0.00930233	0.709622	0.0167131	0.674641	0.647746	0.00961307	0.0198823	0.00485437	0.00940111	0.00907258	0.0113563	0.00916784
CGDMR	2407	Bd1-1	Bd1	19658700	19659099	399	hypo	0.00806452	0	1	0.987013	0.975904	0	0.018018	0	0	0.860294	0.639456	0.581395	0	0	0.00340136	0	0.00837989	0.0178571	0.0145719	0.00505051	0
CGDMR	2414	Bd1-1	Bd1	19738300	19738599	299	hyper	0.98913	NA	0.00634921	0.127321	0.257713	0.962366	0.940397	0.47541	NA	0	0.09375	0.171233	0.571429	0.807692	0.0939597	NA	0.0070922	0.0350877	0.037931	0	0
CGDMR	2415	Bd1-1	Bd1	19749700	19750099	399	hyper	0.935622	0.00606061	0.00657895	0	0.00809717	0.00564972	0.0188679	0.733813	0.0104167	0	0.025	0.030303	0.0192308	0.0151515	0.378173	0.00967742	0.00275482	0.00621118	0.00552486	0.00655738	0.0393258
CGDMR	2416	Bd1-1	Bd1	19753100	19753299	199	hypo	0	0	0.914286	0.912088	0.909722	0.0888889	0.425532	0	0	0.421053	0.454545	0.282828	0	0.0461538	0.0118343	0.00675676	0.117188	0.192488	0.158436	0.01	0.0242718
CGDMR	2426	Bd1-1	Bd1	19799800	19799999	199	hypo	0	0	1	0	0	0.875	0	0.04	0	0.411765	0	0	0.384615	0	0.00403226	0	0.005	0	0.0512821	0	0
CGDMR	2428	Bd1-1	Bd1	19812400	19812999	599	hyper	0.914894	0.954286	0	0.0571429	0.00719425	0.898876	0.983914	0.360927	0.479245	0	0	0.0168067	0.4	0.53112	0.0284218	0.0246734	0.00211864	0	0	0.0157319	0.0112263
CGDMR	2437	Bd1-1	Bd1	19923900	19924199	299	hypo	0.102564	0.945205	0.976471	0.962264	0.937984	0.974359	0.939891	0	0.545455	0.578947	0.625	0.480916	0.675556	0.6	0.0149254	0.0464286	0.0629921	0.0459184	0.0763359	0.0699708	0.0337079
CGDMR	2439	Bd1-1	Bd1	19938500	19938999	499	hypo	0	0.956044	1	0.946746	0.966527	0.952703	0.973333	0.031746	0.672598	0.840426	0.818182	0.759494	0.609626	0.741667	0.00293255	0.00806452	0.013544	0.00722892	0.00631912	0.00442478	0.0101351
CGDMR	2444	Bd1-1	Bd1	19966700	19967099	399	hypo	0.0686275	0.940476	0.98	0.758621	0	0.906977	0.964029	0.0394737	0.211538	0.485714	0.380952	0	0.517857	0.7125	0.00294118	0.0125523	0.0142857	0.024	0	0.0268199	0.0352941
CGDMR	2448	Bd1-1	Bd1	20012400	20012599	199	hyper	0.96	0	0.1	NA	NA	0	NA	0.513514	0	0.037037	NA	NA	0	NA	0.11236	0	0.0222222	NA	NA	0	NA
CGDMR	2450	Bd1-1	Bd1	20024600	20024899	299	hyper	0.934985	0.0125523	0	0.0188679	0.0115385	0.0037594	0.0110701	0.475694	0	0	0.0295858	0	0.00371747	0	0.0252632	0.00666667	0.00934579	0	0.00328947	0.00716846	0.00320513
CGDMR	2451	Bd1-1	Bd1	20025000	20025299	299	hyper	0.975439	0	0	0.0148148	0.0215054	0.00719425	0.00487805	0.811111	0	0.0609756	0	0.0204082	0.00819672	0.011976	0.012959	0.00294118	0	0.00568182	0.00632911	0.0288462	0
CGDMR	2452	Bd1-1	Bd1	20025400	20025799	399	hyper	0.967742	0.115385	0.09	0.0153846	0.0677083	0.202312	0.099359	0.795238	0.00531915	0.00961539	0.010929	0.0287356	0.0201342	0.00378788	0.0164794	0.00652528	0.00591716	0.00965251	0.00520833	0.0168421	0.0107362
CGDMR	2454	Bd1-1	Bd1	20026200	20026899	699	hyper	0.960199	0.189112	0.00471698	0.0964467	0.0132159	0.578534	0.00636943	0.746562	0.0468384	0.0136986	0.0629371	0.0106007	0.196	0	0.00939543	0.00989283	0.00433526	0.0117647	0.0198413	0.00762066	0.00435414
CGDMR	2458	Bd1-1	Bd1	20090200	20090799	599	hypo	0.00510204	0.920635	0.955357	0.192308	0.697674	0.909091	0.946058	0.0163043	0.431718	0.774648	0	0.342342	0.409302	0.523256	0.00317965	0.0328205	0.0237467	0.0853659	0.0926641	0.0355691	0.0450122
CGDMR	2462	Bd1-1	Bd1	20103900	20104099	199	hyper	0.902439	0	0	0	0	0	0.636364	0	0	0	0	0	0	0.0172414	0.00515464	0.0114943	0.00729927	0.0222222	0	0	0
CGDMR	2467	Bd1-1	Bd1	20159700	20159899	199	hyper	0.842105	0.06	0	0	0	0	0.03125	0.0573248	0.0103093	0	0	0	0	0	0.0140845	0.00775194	0.0238095	0	0	0	0
CGDMR	2469	Bd1-1	Bd1	20193800	20194199	399	hypo	0.0436508	0.95986	0.960526	0.864407	0.861314	0.955036	0.0176991	0.0421687	0.715	0.675676	0.689394	0.691943	0.694611	0	0.0115774	0.0181976	0.00660066	0.0162866	0.0239521	0.0128088	0.00207469
CGDMR	2471	Bd1-1	Bd1	20206400	20206599	199	hypo	0.0231214	0.542254	0.882353	0.452381	0.394737	0.41	0.347222	0.0118343	0.00694444	0	0	0.0169492	0.0222222	0.0127389	0.014881	0.0208333	0	0.0151515	0.0121951	0.0272109	0.0138889
CGDMR	2472	Bd1-1	Bd1	20208000	20208499	499	hypo	0.035316	0.930357	0.973384	0.968553	0.918919	0.958882	0.0204918	0.0508906	0.62256	0.637681	0.671141	0.646259	0.784861	0.0383481	0.00979192	0.00888889	0.00491803	0.0299539	0.0154143	0.0100865	0.00554324
CGDMR	2474	Bd1-1	Bd1	20230100	20230299	199	hyper	0.943431	0	0	0.00520833	0.0102041	0.0113636	0.0125	0.42663	0	0	0	0	0.00383142	0	0.0125142	0.00242131	0	0.00510204	0.0207254	0.00524934	0.00420168
CGDMR	2476	Bd1-1	Bd1	20259100	20259399	299	hyper	0.91369	0	0.00943396	0	0	0.941176	0.84585	0.764706	0	0	0	0	0.536232	0.705882	0.0477081	0.00540541	0.0021322	0.00478469	0.00511509	0.0121396	0.0415486
CGDMR	2477	Bd1-1	Bd1	20262900	20263599	699	hyper	0.962622	0.011236	0.0315534	0.963346	0.00658979	0.016692	0.974494	0.714385	0.00470219	0.00673401	0.750559	0.00990099	0.00447427	0.790942	0.0409165	0.00518135	0.0106572	0.0185811	0.00229358	0	0.0590736
CGDMR	2478	Bd1-1	Bd1	20266100	20266299	199	hypo	0	0.197802	0.967742	NA	0	0	0	0	0.0107527	0.428571	NA	0	0	0	0	0	0	NA	0	0.030303	0
CGDMR	2489	Bd1-1	Bd1	20385300	20385599	299	hypo	0.0350877	0.00645161	0.858065	0	0	0.00628931	0.0204082	0.0188679	0.0387097	0.45977	0.121212	0.09375	0.0155039	0	0.0151515	0.131443	0.0982801	0.0543478	0.162162	0.0245399	0
CGDMR	2490	Bd1-1	Bd1	20392700	20393999	1299	hyper	0.959981	0.00813481	0.00688073	0.020073	0.0111684	0.00518672	0.967062	0.421238	0.00977199	0	0.0160256	0.0254777	0.0166976	0.626217	0.00960672	0.0057999	0.00575816	0.00169205	0.000793021	0.00524934	0.0103741
CGDMR	2491	Bd1-1	Bd1	20394100	20394399	299	hyper	0.945607	0.00302115	0	0	0.0459184	0.00502513	0.983673	0.0941176	0.0132159	0.0238095	0	0.0230769	0	0.736248	0.0094697	0.00717703	0.0177515	0.0136986	0	0.00471698	0.00987798
CGDMR	2492	Bd1-1	Bd1	20400500	20401699	1199	hypo	0.0094697	0.95071	0.966729	0.77886	0.962475	0.963315	0.0138203	0.00969163	0.609408	0.650528	0.289968	0.639827	0.57657	0.0171386	0.00741084	0.0133129	0.00762776	0.0105416	0.00956633	0.0161146	0.00471142
CGDMR	2494	Bd1-1	Bd1	20421500	20421699	199	hyper	0.773684	0.0461538	0	0.529412	0	0.313725	0.05	0.244565	0.0188679	0	0.375	NA	0	0	0.015625	0.00555556	0	0	NA	0.00653595	0
CGDMR	2502	Bd1-1	Bd1	20509000	20509299	299	hypo	0.0533333	0.283333	1	0	0.111111	0	0.0238095	0	0.0517241	0.28	0	0	0	0.0196078	0.00487805	0	0.004914	0	0	0	0
CGDMR	2504	Bd1-1	Bd1	20523300	20523499	199	hypo	0.0178571	0.0645161	0.863636	0.666667	0	0	0.285714	0.0153846	0	0.0243902	0	0	0	0	0.017094	0.0205479	0	0	0	0.00645161	0
CGDMR	2505	Bd1-1	Bd1	20560200	20560499	299	hypo	0	0.952381	1	0	0.861111	0.959184	1	0	0.0454545	0	NA	0	0.0512821	0	0.0176211	0	0	0	0	0.00298507	0.00531915
CGDMR	2508	Bd1-1	Bd1	20564400	20564599	199	hypo	0.0606061	0.975155	0.878981	0.976744	0.957386	0.959119	0.966387	0.0243902	0.122449	0.289474	0.168539	0.310345	0.300971	0.25	0	0.00766283	0	0.00522193	0	0.00898876	0.00466563
CGDMR	2512	Bd1-1	Bd1	20570200	20570499	299	hyper	0.894928	0.0333333	0.0384615	0	0	0.0136986	0.0116959	0.64977	0	0.0227273	0	0.0135135	0	0.0126582	0.0251397	0.00210084	0.00343643	0.00515464	0.0106383	0	0.00217865
CGDMR	2516	Bd1-1	Bd1	20602400	20602599	199	hypo	0	0.728814	0.882353	NA	0.909091	0.652174	0.297872	0	0.037037	0	0	0	0	0	0.00892857	0.0111732	0	0.0769231	0	0.0263158	0.00682594
CGDMR	2531	Bd1-1	Bd1	20669500	20669699	199	hyper	1	0	0	NA	0	0.346154	0	0.0169492	0	0.0322581	NA	0	0.0555556	0.0185185	0.0155039	0	0.0178571	NA	0	0.02	0.00862069
CGDMR	2535	Bd1-1	Bd1	20684000	20684199	199	hyper	1	0	0	0	0	0	0	0.578947	0	0	0	0	0	0	0	0	0	0	0.0106383	0	0
CGDMR	2538	Bd1-1	Bd1	20692600	20692799	199	hypo	0	0.601562	0.77193	0	0.577982	0.136364	0.654362	0.00574713	0.0120968	0	0.075	0.0175439	0.0120482	0.00343643	0.00874636	0.00151057	0	0	0.00393701	0.0046729	0.00401069
CGDMR	2541	Bd1-1	Bd1	20702300	20702499	199	hypo	0.0540541	0	0.923077	0	0	0.73494	0.0222222	0.0377358	0.0121951	0.613636	0.0752688	0.026087	0.503311	0.0135135	0	0	0.0392157	0	0.0210526	0.0060241	0
CGDMR	2544	Bd1-1	Bd1	20733200	20733599	399	hyper	0.920474	0.00967742	0.0126582	0.0136054	0.0176991	0.0153846	0.0109204	0.0843672	0.0173913	0	0	0	0	0.0136612	0.00565771	0	0.0149254	0.0326087	0.0070922	0.00938967	0.00659341
CGDMR	2545	Bd1-1	Bd1	20734300	20734599	299	hyper	0.835366	0.010989	0	0.0625	0	0	0.0350877	0.186916	0	0	0	0	0.0188679	0.0123457	0.0111248	0.00694444	0.00746269	0	0.029703	0.004	0.0136519
CGDMR	2546	Bd1-1	Bd1	20743000	20743199	199	hyper	0.814433	0.204545	0	0.0277778	0.0319149	0	0	0.222222	0.0526316	0	0	0.025	0.0882353	0	0.0361174	0	0.00452489	0.00609756	0.0194553	0	0
CGDMR	2547	Bd1-1	Bd1	20752000	20752199	199	hypo	0	0.444444	1	0.708333	1	0.875	1	0.0625	0	1	0.894737	0	0.5	0.6	0.00662252	0.0131579	0	0.0151515	0	0.0128205	0
CGDMR	2552	Bd1-1	Bd1	20784600	20784799	199	hyper	0.902439	0.75	0	1	0.923077	0.2	0.777778	0.00763359	0	0.03125	0	0	0	0	0.01	0.0289855	0	0	0.0136986	0	0
CGDMR	2553	Bd1-1	Bd1	20802000	20802199	199	hypo	0	0	0.970588	0.333333	0.075	0	0.0909091	0.0377358	0	0.679012	0	0.0444444	0.0526316	0.0638298	0.00842697	0	0.0257235	0	0.00581395	0.0176991	0.0200803
CGDMR	2555	Bd1-1	Bd1	20821300	20821499	199	hyper	0.932584	0.65625	0.0789474	0.902439	0	0	0	0.0229358	0	0	0	0	0	0	0.00671141	0	0.0124224	0	0	0	0.00358423
CGDMR	2556	Bd1-1	Bd1	20822400	20822699	299	hyper	0.905882	0.435484	0	1	0.657143	0.652174	0.461538	0	0	0.0196078	0	0.016129	0	0.016129	0.00557621	0.0022173	0.00980392	0	0	0.00884956	0.00534759
CGDMR	2559	Bd1-1	Bd1	20856200	20856399	199	hyper	0.980392	0.0124224	0	0	0.0196078	0	0.00840336	0.647059	0.01	0	0	0.0169492	0.03125	0.0425532	0	0	0	0	0.0111111	0	0.0254545
CGDMR	2569	Bd1-1	Bd1	20948400	20948599	199	hyper	0.905537	0.00406504	0	0.0131579	0	0	0.00662252	0.436214	0.0254237	0	0	0	0.0128205	0.0070922	0.00970874	0	0	0.00862069	0	0	0.0137615
CGDMR	2577	Bd1-1	Bd1	21006700	21007299	599	hypo	0.00486224	0.942572	0.984076	0.985366	0.977891	0.962629	0.97095	0.0171756	0.539106	0.694737	0.612903	0.707407	0.636364	0.630189	0.00106157	0.0214968	0.014652	0.00654665	0.00591716	0.0106686	0.0153641
CGDMR	2578	Bd1-1	Bd1	21008000	21008499	499	hyper	0.963068	0.0056338	0.0106383	0.915584	0.00704225	0.00874636	0.0140187	0.577558	0.00675676	0.0322581	0.810127	0.0169492	0.0273973	0.00502513	0.0088141	0.00715563	0.00729927	0	0	0.00391389	0.00357143
CGDMR	2579	Bd1-1	Bd1	21009600	21010399	799	hyper	0.939086	0.00974659	0.00277778	0.00510856	0.0109389	0.00492611	0.0107875	0.262172	0.0108401	0.0037037	0.019697	0.00684151	0.0134228	0.0143678	0.0270101	0.00593472	0.00961539	0.0049505	0.0119284	0.00494234	0.00817757
CGDMR	2581	Bd1-1	Bd1	21024100	21024299	199	hyper	0.878261	0.0131579	0.037037	0	0	0	0.037037	0.602564	0.0333333	0.0555556	0.1	0	0	0	0.00747198	0.0103806	0	0	0.016129	0.00531915	0.00502513
CGDMR	2584	Bd1-1	Bd1	21043800	21044499	699	hyper	0.937795	0.746171	0.0113636	0.986193	0.80456	0.974576	0.975104	0.590591	0.176781	0	0.714885	0.290323	0.713087	0.725291	0.013373	0.00351288	0.00191205	0.0156107	0.00911162	0.0111654	0.0114286
CGDMR	2585	Bd1-1	Bd1	21067300	21067499	199	hypo	0.0265487	0.529915	0.980392	0.104167	0.908425	0.0232558	0.0120482	0.0149254	0.0490798	0.0344828	0	0.0820513	0	0	0.00722022	0.00826446	0	0	0.00992908	0.004914	0.00263852
CGDMR	2586	Bd1-1	Bd1	21072100	21072299	199	hyper	0.870968	0	0	NA	0	0.0588235	0.0909091	0.25	0	0	NA	NA	0	0	0	0	0	NA	0.333333	0.0222222	0
CGDMR	2591	Bd1-1	Bd1	21089900	21090199	299	hypo	0.0337838	0.05	1	0	0	0	0	0.03125	0.0434783	0.65	0	0	0.015625	0	0.00408163	0	0.00613497	0	0	0	0.00384615
CGDMR	2596	Bd1-1	Bd1	21149300	21149599	299	hypo	0.0416667	0.224138	0.976744	0.883495	0.946237	0.933333	0.674419	0.02	0	0.0666667	0.631579	0.454545	0.368421	0.191489	0.0131579	0	0.026087	0.0330579	0.014218	0.0152439	0.0232558
CGDMR	2598	Bd1-1	Bd1	21172600	21172899	299	hypo	0.0941176	0.718391	0.8	0.912281	0.801724	0.583732	0.9	0.0158311	0.0153846	0.00943396	0.0275862	0.0294118	0.00934579	0.0178042	0.0130208	0.00395778	0.0111524	0.0164609	0.00902527	0.00537057	0.00402685
CGDMR	2599	Bd1-1	Bd1	21178400	21178599	199	hypo	0	0	1	NA	NA	0.285714	0.363636	0	0	0.375	NA	NA	0	0	0	0	0.0208333	NA	NA	0	0
CGDMR	2601	Bd1-1	Bd1	21186100	21186299	199	hyper	0.92	0.40625	0.0344828	0	1	0	0.186047	0.0105263	0	0.0208333	0	0	0	0.0135135	0.0070922	0.00442478	0	0	0.00409836	0.0100503	0.00884956
CGDMR	2604	Bd1-1	Bd1	21210800	21210999	199	hypo	0.00625	0.860294	0.935484	NA	0.831461	0.867841	0.788235	0.0215054	0.343284	0.333333	NA	0.341463	0.340741	0.209677	0.0075188	0.116505	0.0752688	NA	0.0967742	0.110843	0.0168919
CGDMR	2606	Bd1-1	Bd1	21213400	21213699	299	hypo	0.0238095	0	0.95	0	0	0	0	0.0107527	0	0.510638	0	0	0	0.0754717	0.00689655	0.0127119	0.0129032	0.0833333	0	0.0083682	0
CGDMR	2613	Bd1-1	Bd1	21239200	21239899	699	hypo	0.00612245	0.949178	0.980306	0	0.949405	0.953741	0.962437	0.011194	0.307544	0.483784	0	0.235537	0.15	0.425401	0.00860047	0.00854701	0.0158353	0.00520833	0.0182522	0.00626067	0.023766
CGDMR	2617	Bd1-1	Bd1	21257300	21257599	299	hyper	0.921171	0.00335571	0	0.0296296	0.0114504	0	0.00519481	0.546952	0.00436681	0.0151515	0.0515464	0.00518135	0.0144928	0.00378788	0.00690335	0.00519481	0.0075188	0	0.0206186	0.00862069	0
CGDMR	2618	Bd1-1	Bd1	21257700	21258299	599	hyper	0.970886	0.00288184	0.0129032	0.0128755	0.00627615	0.0117925	0.00587084	0.66124	0.0108303	0.00833333	0.037037	0.0348837	0.0299625	0.00840336	0.00951475	0.00706714	0	0.00319489	0.00894188	0.00966851	0.00417973
CGDMR	2621	Bd1-1	Bd1	21316800	21316999	199	hyper	0.905405	0	0	1	0	0	0.0384615	0.425926	0	0	1	0	0	0	0	0	0	0.0431034	0	0.0267857	0
CGDMR	2622	Bd1-1	Bd1	21331900	21332099	199	hypo	0.0307692	0.025641	0.971429	0	0.034188	0.0123457	0.0114943	0.00833333	0	0.264706	0.0227273	0.0291262	0.0126582	0	0.0117417	0	0	0	0.00242718	0.00621118	0.00331126
CGDMR	2625	Bd1-1	Bd1	21359400	21360199	799	hypo	0.0087146	0.874088	0.971774	0.944637	0.840149	0.806907	0.808344	0.0203488	0.674074	0.836735	0.743529	0.580952	0.465677	0.6	0.0271845	0.0370153	0.0425532	0.0380395	0.0658385	0.0595989	0.023919
CGDMR	2631	Bd1-1	Bd1	21399600	21399899	299	hypo	0.0810811	0.0217391	0.967391	0.166667	0	0	0.0714286	0.0102041	0	0.44	0	0	0	0.025641	0.0225225	0	0	0	0.0135135	0	0
CGDMR	2633	Bd1-1	Bd1	21437700	21438299	599	hyper	0.923077	0.0119904	0.00892857	0.0183486	0.0149254	0.0163399	0.0984043	0.241758	0.00797872	0.0242718	0.0208333	0	0.0101695	0.00949367	0.0294427	0.00767018	0.0133588	0	0.0111111	0.0031348	0.0064683
CGDMR	2634	Bd1-1	Bd1	21442500	21442699	199	hyper	0.977376	0	0	1	0.0612245	0	0.011236	0.7277	0.00617284	0.0666667	0.928571	0	0	0	0.0135542	0.0018018	0	0	0.0206186	0	0.00772201
CGDMR	2635	Bd1-1	Bd1	21466200	21466399	199	hypo	0.0106383	0.0652174	0.781818	0	0.4	0	0	0.0138889	0	0.0214286	0	0.222222	0	0.0117647	0.00909091	0.00940439	0.00714286	0	0	0.0049505	0.00478469
CGDMR	2639	Bd1-1	Bd1	21506400	21506699	299	hyper	0.858006	0.0202312	0.0046729	0.03	0.0223214	0.0518018	0	0.143418	0.0120968	0.00625	0.008	0.0202703	0.0205882	0	0.0141844	0.0185185	0.010101	0.0175439	0.00416667	0.010582	0
CGDMR	2645	Bd1-1	Bd1	21611900	21612099	199	hypo	0.0636364	0	0.952381	0	0	0.466667	0.964286	0	0.0333333	0.310345	0	0	0.05	0.0238095	0.010989	0.0136986	0.0153061	0	0	0.00423729	0.0037037
CGDMR	2647	Bd1-1	Bd1	21637700	21637899	199	hypo	0	0	0.882353	0	0.05	0	0.936937	0.115385	0	0.416667	0	0	0	0.142857	0.0255102	0	0	0	0.0263158	0	0
CGDMR	2650	Bd1-1	Bd1	21657800	21657999	199	hyper	0.897059	0.0217391	0	0.684211	0	0	0	0.0078125	0.0117647	0.030303	0	0	0.015625	0.00840336	0.00963855	0.00727273	0.00952381	0	0	0	0.00773196
CGDMR	2652	Bd1-1	Bd1	21658300	21658699	399	hyper	0.973913	0.05	0	0.605263	0	0	0.36	0.00295858	0.015	0	0	0.00854701	0.017094	0.0263158	0.00684931	0.00425532	0.0100251	0.012766	0.0252101	0.00337838	0
CGDMR	2655	Bd1-1	Bd1	21664200	21664399	199	hyper	1	0.0301205	0.0232558	0.333333	0.354839	0	0	0.428571	0	0	0	0	0	0	0	0	0	0	0	0.027027	0
CGDMR	2656	Bd1-1	Bd1	21691600	21691799	199	hyper	0.975	0.00714286	0	0	0.0487805	0	0.00757576	0.916667	0	0	0	0.0333333	0	0.00917431	0.008	0.0034965	0	0	0	0.0129032	0.00347222
CGDMR	2663	Bd1-1	Bd1	21727100	21727499	399	hypo	0.00506757	0.691282	0.836177	0.717073	0.359877	0.346698	0.924804	0.00211416	0.0274657	0.00689655	0	0.0237226	0.00997151	0.079118	0.00387097	0.0140056	0	0.004	0.0114068	0.0112888	0.011396
CGDMR	2664	Bd1-1	Bd1	21743800	21743999	199	hypo	0	0.0235294	1	0	0.777778	0	0.0307692	0	0.0121951	0.538462	0	0.384615	0	0	0.00793651	0.0204082	0.0178571	0	0.0123457	0	0.0113636
CGDMR	2666	Bd1-1	Bd1	21797400	21797599	199	hypo	0.1	NA	1	0.75	0.956522	0.928571	0.985075	0	0	0.5	0.875	0.59375	0.555556	0.533981	0.121951	0.428571	0.0967742	0.45	0.169231	0.0925926	0.0569106
CGDMR	2669	Bd1-1	Bd1	21839900	21840099	199	hyper	0.966387	0	0	0	0.0208333	0.0114943	0	0.785714	0	0	0	0.0136986	0	0	0.0192308	0.00398406	0	0.0285714	0.0137931	0.00478469	0.00840336
CGDMR	2671	Bd1-1	Bd1	21840600	21841099	499	hyper	0.880488	0.002331	0.0105263	0.00657895	0.0103093	0.00806452	0.00912409	0.701107	0.00470588	0.01	0.00869565	0.00623053	0.00542005	0.00720721	0.0365336	0.00262123	0.0084507	0	0.00506329	0	0.00303644
CGDMR	2674	Bd1-1	Bd1	21861700	21862399	699	hyper	0.926267	0.0118708	0.0136364	0.97	0.0240623	0.0164766	0.016969	0.114286	0.012012	0.0291667	0.286957	0.00662252	0.0244898	0.0175439	0.03125	0.00474496	0.00909091	0.00722022	0.0078125	0.0123023	0.010274
CGDMR	2676	Bd1-1	Bd1	21877200	21877399	199	hypo	0.0128205	0.960938	1	1	1	0.96875	0.973333	0	0.820106	0.71875	0.8	0	0.807339	0.769231	0	0.0227273	0	0	0	0.005	0.0238095
CGDMR	2677	Bd1-1	Bd1	21879700	21879899	199	hypo	0	1	0.888889	1	1	0.93617	0.955556	0.02	0.421053	0.9	0.6	0.333333	0.735849	0.657143	0.0157895	0	0.04	0	0	0	0.00613497
CGDMR	2680	Bd1-1	Bd1	21907500	21907999	499	hyper	0.885006	0.00312826	0.00466201	0.00409836	0.00729927	0.00783699	0.0131234	0.247573	0.0121951	0.00515464	0.0196078	0	0	0.0142857	0.00727567	0.0050578	0.0110236	0.00311526	0.00847458	0.0142012	0.00806452
CGDMR	2681	Bd1-1	Bd1	21908100	21908299	199	hyper	0.965732	0	0	0.00588235	0.0168067	0	0.00406504	0.193333	0.00625	0.00925926	0	0	0.0136054	0.00909091	0.00609756	0	0.0204082	0.00763359	0.00401606	0	0.00487805
CGDMR	2685	Bd1-1	Bd1	21914800	21914999	199	hypo	0.0121951	0.136364	0.904762	0	0.0322581	0	0.242424	0.030303	0	0.555556	0.0909091	0	0	0	0.00512821	0.0359281	0.0425532	0	0.0465116	0.033557	0
CGDMR	2686	Bd1-1	Bd1	21916300	21916599	299	hypo	0.111801	0.141667	0.964286	0.957447	0.880952	0.883929	0.335878	0.016129	0.0169492	0.611111	0.166667	0.234043	0.0909091	0.2	0.00401606	0.00444444	0.010582	0.00434783	0.00568182	0.00631579	0.00814664
CGDMR	2691	Bd1-1	Bd1	21943300	21943499	199	hypo	0	0	0.727273	0	0.0625	0.025641	0.0384615	0.0078125	0	0.0357143	0	0	0	0	0.011215	0.0060423	0.0330579	0	0.0151515	0	0
CGDMR	2695	Bd1-1	Bd1	21974000	21974299	299	hypo	0	0.960396	0.984848	0.95	0.928571	0.962963	0.980392	0	0.745763	0.821429	0.565217	0.458333	0.597015	0.419355	0.00550964	0.0190114	0.0147059	0	0.0217391	0.00847458	0
CGDMR	2701	Bd1-1	Bd1	22074300	22074599	299	hypo	0.00584795	0.010101	0.936709	0	0	0.0350877	0.0357143	0.00900901	0.0103627	0.00694444	0	0.010989	0	0	0.013986	0.00928074	0.00560224	0	0	0	0.00277008
CGDMR	2705	Bd1-1	Bd1	22096800	22097599	799	hypo	0.0243493	NA	0.978289	0.285714	0.246914	0.428571	0.925926	0.0230906	NA	0.596107	0.25	0.375	0.333333	0.833333	0.0242131	NA	0.00452489	0	0.0816327	0.111111	0
CGDMR	2708	Bd1-1	Bd1	22114300	22114599	299	hyper	0.962264	0.866667	0.111111	0.8	0.875	0.8	1	0.0130435	0	0	0	0	0	0	0.00321027	0	0	0.0238095	0	0.0159574	0
CGDMR	2716	Bd1-1	Bd1	22155800	22155999	199	hypo	0.0294118	0.984127	1	1	0.866667	0.947368	0.978495	0.00862069	0.65	0.680556	0.0909091	0.267717	0.234694	0.304348	0.00675676	0.0169492	0.0121951	0	0.00662252	0.0232558	0.00617284
CGDMR	2720	Bd1-1	Bd1	22192400	22193199	799	hyper	0.95122	0.00527903	0.00974421	0.734903	0.952536	0.00552995	0.00592885	0.114504	0.00481928	0.00650406	0.210294	0.372587	0.00167504	0.00449944	0.00907788	0.00666263	0.0121317	0.0254777	0.0192744	0.00840336	0.00527241
CGDMR	2721	Bd1-1	Bd1	22211200	22211499	299	hyper	0.868421	0.190476	0.0322581	0	0.955556	0.873684	0.925	0.0123457	0.0232558	0	0	0.0555556	0	0	0	0.00980392	0	0	0	0	0.0107527
CGDMR	2724	Bd1-1	Bd1	22222400	22222599	199	hypo	0.0327869	NA	0.944444	NA	0	0	0.222222	0	NA	0.428571	NA	0	NA	NA	0	NA	0.0909091	NA	0	0	0
CGDMR	2726	Bd1-1	Bd1	22231900	22232399	499	hyper	0.98	0	0	0.233333	0.333333	0.232143	0.164384	0.552632	0	0	0	0	0.0851064	0	0.0124309	0	0.00507614	0	0	0.0223048	0.056338
CGDMR	2727	Bd1-1	Bd1	22233100	22233599	499	hypo	0.00917431	0.00963391	0.968447	0.025641	0.0140449	0.00917431	0.00343643	0.0157171	0.00212314	0.694149	0.021097	0	0.0136519	0.00220264	0.00609756	0.00128205	0.0106572	0.00738007	0	0.00954198	0.00163934
CGDMR	2730	Bd1-1	Bd1	22238300	22238699	399	hypo	0.0103397	0.0152964	0.914425	0	0.0175439	0.00952381	0.0112108	0.0101781	0.0191083	0.220884	0.0108108	0.00452489	0.0104167	0.0448276	0.00397351	0.00547445	0.00854701	0.00917431	0.0122449	0.00677966	0.0075
CGDMR	2737	Bd1-1	Bd1	22279900	22280299	399	hypo	0	0.802752	0.904	0.5	0.566372	0.75	0.693252	0.0168539	0.340625	0.875	0.153333	0.190184	0.195122	0.323276	0.00603318	0.00879507	0.0165877	0.00481928	0.0102215	0.0162037	0.0160367
CGDMR	2738	Bd1-1	Bd1	22281400	22281699	299	hypo	0.0224719	0.0160428	0.956989	0	0.0462428	0.0238095	0.0300752	0.0634921	0.0357143	0.779412	0	0.0263158	0.0581395	0.0677966	0.0109756	0.0078125	0.0078534	0.00625	0.0114286	0.0157233	0.0159151
CGDMR	2743	Bd1-1	Bd1	22326000	22326199	199	hypo	0.0134529	0.645161	0.969697	0.797872	0.833333	0.826923	0.621951	0	0.757576	0.608696	0.645833	0.542857	0.434783	0.424242	0	0.430769	0.0657895	0.0769231	0	0	0
CGDMR	2747	Bd1-1	Bd1	22344900	22345099	199	hypo	0	0.894737	0.966667	1	0.527473	0.831081	0.977143	0.0135135	0.183575	0.521739	0	0.0538462	0.0309278	0.528689	0.00438597	0.00428265	0.0571429	0	0.00842697	0.00187266	0.0133779
CGDMR	2750	Bd1-1	Bd1	22350200	22350399	199	hypo	0	0.85	0.972973	NA	1	1	0.967742	0	0.5	0.515152	NA	0.285714	0.44	0.509434	0	0	0.0980392	NA	0.125	0.0412371	0
CGDMR	2752	Bd1-1	Bd1	22354200	22354899	699	hypo	0.0110865	0.962472	0.984424	0.971736	0.97083	0.962748	0.973079	0.00429184	0.434585	0.551724	0.601124	0.549317	0.412467	0.584659	0.00947226	0.00473373	0.00700935	0.00610169	0.00591716	0.00867052	0.00646204
CGDMR	2753	Bd1-1	Bd1	22355100	22355399	299	hypo	0.0126582	0.928473	0.985258	0.962264	0.959477	0.959427	0.978604	0	0.246418	0.468927	0.663462	0.38253	0.282297	0.317191	0	0.0243218	0.0212766	0.00238663	0.00902708	0.0209895	0.0140962
CGDMR	2756	Bd1-1	Bd1	22375100	22375299	199	hypo	0.012987	0.05	0.965517	0	1	0.833333	0	0	0	0.388889	0	NA	0.857143	0	0	0	0	0.04	0	0	0
CGDMR	2760	Bd1-1	Bd1	22399500	22399799	299	hypo	0.123762	0.984694	1	0.916667	0.914894	0.971014	0.968153	0.034188	0.904255	0.909091	0.153846	0.595238	0.717949	0.833333	0.00294551	0.00585651	0.00647249	0	0.00291545	0.00819672	0.0132576
CGDMR	2761	Bd1-1	Bd1	22399900	22400099	199	hypo	0	0.955556	1	NA	NA	0.943182	1	0	0.820513	0.466667	NA	NA	0.907895	0.869048	0	0.0131579	0.015625	NA	NA	0.00380228	0.0176211
CGDMR	2762	Bd1-1	Bd1	22400300	22400499	199	hypo	0.0377358	0.963636	1	0.791667	0.90625	0.984733	0.98913	0.0190476	0.587719	0.538462	0.185185	0.0462963	0.43609	0.793548	0.00840336	0.0101266	0	0	0.0127389	0.0100756	0.0145985
CGDMR	2765	Bd1-1	Bd1	22402700	22403499	799	hyper	0.952675	0.96916	0.00728155	0.968481	0.967413	0.978512	0.966095	0.541262	0.668359	0.00765306	0.735456	0.686946	0.734507	0.633415	0.00980724	0.0279664	0.00381679	0.015897	0.01566	0.0153731	0.0269675
CGDMR	2768	Bd1-1	Bd1	22459700	22459999	299	hypo	0.00840336	0.94382	0.932292	0.726154	0.895722	0.923518	0.92381	0.00526316	0.127778	0.395604	0.0406977	0.274611	0.320557	0.0523256	0.00560748	0	0.00387597	0.0037594	0.00387597	0.0134715	0.00193424
CGDMR	2769	Bd1-1	Bd1	22460100	22460299	199	hypo	0	0.973094	0.971698	0.918033	0.80315	0.901515	0.831325	0.0172414	0.188811	0.37037	0.37037	0.375	0.325301	0.134328	0	0.0022779	0.00985222	0.011236	0	0.00819672	0.00657895
CGDMR	2775	Bd1-1	Bd1	22504000	22504199	199	hypo	0	0.986014	0.982143	0.782609	0.765957	0.978417	0.963636	0	0.779661	0.888889	0.8125	0.820513	0.700787	0.851485	0	0.0302198	0.0177515	0	0.0551724	0.00864553	0.0339506
CGDMR	2777	Bd1-1	Bd1	22504500	22504699	199	hypo	0	0	0.971429	0	0.1	0	0.0833333	0.00966184	0	0.789855	0.047619	0.016129	0	0.0333333	0.00326797	0	0.0186567	0	0	0	0.0103093
CGDMR	2779	Bd1-1	Bd1	22540700	22541499	799	hyper	0.968439	0.0128663	0.0305011	0.0216401	0.0191571	0.0108918	0.0160473	0.257552	0.0259209	0.0083682	0.00552486	0.0143266	0.00863132	0.0163447	0.00946644	0.028103	0.0326087	0.0280665	0.0159046	0.0161017	0.0192644
CGDMR	2780	Bd1-1	Bd1	22541700	22541899	199	hypo	0.0588235	0.735294	1	0	0.333333	0.954545	0.777778	0	0.545455	0.923077	0.2	0.0689655	0.5	0.685185	0.0127119	0.00854701	0	0	0.0384615	0.0709677	0.0946746
CGDMR	2786	Bd1-1	Bd1	22576000	22576399	399	hypo	0.00677966	0.670762	0.973094	0.0408163	0.76584	0	0.143396	0.0147059	0.162879	0.348485	0.0333333	0.0649351	0.0411765	0.0869565	0.0155807	0.00880626	0.0153584	0	0.00806452	0.0025974	0.00458716
CGDMR	2798	Bd1-1	Bd1	22839500	22839699	199	hypo	0.00625	0.566038	1	0	0.71875	0.861538	0.901554	0	0.0526316	0.433333	0.0909091	0	0.357143	0.125	0.0339506	0.00534759	0.00892857	0	0	0.00819672	0
CGDMR	2799	Bd1-1	Bd1	22839900	22840099	199	hypo	0.0462963	0.984375	1	0.0444444	0.825203	0.983673	0.955056	0	0.577778	0.0645161	0	0.1	0.558559	0.047619	0.0272109	0.00306749	0.010929	0	0.014553	0.0111111	0.0140845
CGDMR	2800	Bd1-1	Bd1	22840400	22841099	699	hypo	0.00541516	0.96741	0.978261	0.97724	0.957557	0.972305	0.973396	0.0179487	0.735556	0.826087	0.787879	0.770513	0.758665	0.761468	0.0105003	0.0133789	0.0117724	0.0152566	0.00920343	0.0159214	0.0111762
CGDMR	2802	Bd1-1	Bd1	22852400	22852899	499	hyper	0.945384	0.00577367	0	0.941748	0.00888889	0.00612245	0.00877193	0.138298	0.0127971	0.00540541	0.747283	0.018018	0.00664452	0.00531915	0.0113422	0.00110988	0.00332226	0.0255034	0	0.00245098	0.00413651
CGDMR	2805	Bd1-1	Bd1	22858500	22858799	299	hyper	0.883465	0.869116	0.0196078	0.812785	0.908148	0.00280112	0.00835073	0.533228	0.610805	0	0.454082	0.712121	0.00266667	0.011976	0.0203466	0.0113208	0.0169492	0.0113269	0.036729	0.00165017	0.00381194
CGDMR	2813	Bd1-1	Bd1	22898400	22898599	199	hyper	0.880952	0.327869	0	0.842105	0.444444	0.135135	0.171429	0.0261438	0.00699301	0	0	0	0	0	0.00959233	0.00277008	0	0.0246914	0	0.0046083	0.0052356
CGDMR	2814	Bd1-1	Bd1	22901500	22901799	299	hypo	0.0545455	0.96988	0.979592	0.0277778	0.04	0.0194175	0.00769231	0.0555556	0.806723	0.414286	0	0	0	0	0.0632911	0.014556	0.00204082	0.03125	0.0967742	0.0126582	0.0826772
CGDMR	2815	Bd1-1	Bd1	22902400	22902699	299	hyper	0.984064	0.0186916	0.00826446	0.997382	0	0.00925926	0.0126582	0.530516	0.0333333	0	0.863924	0.016	0.0114943	0.0157895	0.017611	0.00456621	0.00203666	0.0235889	0.00190476	0.00707214	0.00399202
CGDMR	2816	Bd1-1	Bd1	22916900	22917099	199	hypo	0.0184049	0.010989	0.80303	0.0103093	0.012987	0.0217391	0.0173913	0	0.0229358	0	0	0.00520833	0.010101	0.00595238	0.00649351	0.00672043	0.00983607	0.0168856	0.00669344	0.00483871	0.00722892
CGDMR	2817	Bd1-1	Bd1	22917300	22917599	299	hypo	0.00980392	0.0039604	0.820513	0.0130719	0.00561798	0.0137694	0.0124777	0.013986	0.0132013	0.0204082	0	0	0.0112782	0.00711744	0.010989	0.00227273	0.0203046	0	0.027972	0.00469484	0.0027248
CGDMR	2819	Bd1-1	Bd1	22923100	22923499	399	hyper	0.966443	0.0087146	0.0130719	0	0.0234742	0	0.0257143	0.0297619	0.00480769	0	0.0181818	0	0.0226244	0	0.0132979	0.0123839	0	0.0224719	0	0.00974026	0.00569801
CGDMR	2820	Bd1-1	Bd1	22951000	22951299	299	hypo	0	0.97479	1	0.7	0.775862	0.977273	0.932432	0.0232558	0.521739	0.428571	0	0.0731707	0.538462	0.409836	0	0.00616016	0.0146341	0	0	0.0124069	0.0121951
CGDMR	2827	Bd1-1	Bd1	23034900	23035199	299	hyper	0.836471	0.00840336	0	0.003003	0.00455581	0.00226757	0.0042796	0.0365169	0	0	0.00609756	0	0	0.0233333	0.0136411	0.00250627	0.015873	0.0178571	0.00915332	0.0078534	0.00286944
CGDMR	2828	Bd1-1	Bd1	23042300	23042599	299	hyper	0.871886	0.00657895	0	0.0625	0.00980392	0.0189873	0.00735294	0.175	0	0	0	0.0133333	0	0.00925926	0.0165877	0.00664452	0	0	0.00877193	0.0037037	0.00276243
CGDMR	2829	Bd1-1	Bd1	23044500	23045299	799	hyper	0.958763	0.95478	0.0240385	0.978214	0.967128	0.981208	0.0238806	0.698413	0.790698	0.0466102	0.886894	0.807396	0.769394	0.0214133	0.0186446	0.0172185	0.0131579	0.0226131	0.0169039	0.0142084	0.00446761
CGDMR	2830	Bd1-1	Bd1	23059200	23059399	199	hypo	0.208333	0.652482	0.926829	0.675676	0.747664	0.846154	0.920705	0.02	0.283871	0.4	0.857143	0.348837	0.390977	0.582329	0.0316456	0.0877551	0.092233	0.163399	0.0935252	0.0995025	0.0675862
CGDMR	2834	Bd1-1	Bd1	23088500	23088699	199	hypo	0	0.869919	0.953488	0.850575	0.884615	0.853211	0.66129	0.0149254	0.141593	0.16	0.0810811	0.162791	0.133333	0.0952381	0.0138067	0.0167464	0.0328947	0.0275862	0	0.0322581	0.0172414
CGDMR	2835	Bd1-1	Bd1	23101300	23101599	299	hypo	0.0291262	0.0106383	0.916667	0.0196078	0	0.00775194	0.016	0.0190024	0.0267176	0.136612	0.0144928	0	0.016129	0.0116959	0.00807382	0.00322581	0.0123457	0.00344828	0.0078125	0.0136364	0.00673401
CGDMR	2837	Bd1-1	Bd1	23105300	23105499	199	hypo	0	0	0.896552	0	0	0	0	0.0190476	0	0.54955	0.166667	0	0	0.0238095	0.0117188	0	0.121849	0	0	0	0
CGDMR	2838	Bd1-1	Bd1	23121100	23121699	599	hyper	0.90625	0.952015	0	0.968858	0.95942	0.929245	0.946988	0.00974659	0.00742312	0.0100756	0.00650406	0.00603318	0.0178344	0.0103761	0.0058072	0.00776532	0.00178891	0.0181159	0.00499376	0.00941177	0.00706714
CGDMR	2841	Bd1-1	Bd1	23123200	23123699	499	hypo	0.00301205	0.0105263	0.952381	0.945946	0.0144928	0.0425532	0.00357143	0.0192308	0	0.331633	0.352381	0.01	0.0147059	0.0112782	0.00629723	0.00663717	0.0215686	0.0250896	0.0134529	0.0180723	0.00798722
CGDMR	2846	Bd1-1	Bd1	23151800	23151999	199	hyper	0.857143	0.818182	0	0	0.73913	0.516129	0.375	0	0	0	0	0	0	0.02	0	0	0	0	0	0.008	0.0143885
CGDMR	2847	Bd1-1	Bd1	23155100	23155299	199	hyper	0.967213	0.0185185	0	0	0.09375	0	0.0454545	0.775	0.0241935	0	0	0	0.034188	0.0362319	0.0193548	0.00413223	0	0.0178571	0	0.00480769	0
CGDMR	2848	Bd1-1	Bd1	23155500	23155699	199	hyper	1	0.488372	0	0	0	0	0.142857	0.83871	0.297297	0.142857	0	0	0	0	0.0282486	0.003663	0.0166667	0.0123457	0	0	0.0173913
CGDMR	2852	Bd1-1	Bd1	23194100	23194299	199	hyper	0.927273	0.431818	0.0298507	0	0.284091	0.277778	0.0123457	0.337079	0	0.0217391	0	0.0714286	0.0461538	0.0185185	0.00875273	0.00995025	0	0	0.0104712	0.05	0.0191083
CGDMR	2853	Bd1-1	Bd1	23197500	23197699	199	hypo	0	0.9375	0.944444	0.1	0.0384615	0.54717	0.375	0.0576923	0.5	0.285714	0.166667	0	0.2	0.142857	0.0242424	0.0208333	0.0512821	0.0243902	0.0337079	0.00613497	0
CGDMR	2856	Bd1-1	Bd1	23211500	23211699	199	hypo	0.0103093	0.824268	0.779412	0	0.03125	0.755725	0	0.0130719	0.558252	0.584746	0.0204082	0.0138889	0.340807	0.0060241	0.00359712	0.0549828	0.0133929	0.0319149	0.00373134	0.0566038	0
CGDMR	2859	Bd1-1	Bd1	23240600	23240799	199	hyper	1	1	0	0	0.5	1	1	0.677419	0.857143	0.0909091	0	0.363636	0.863636	0.826087	0.0372671	0.0078125	0.0119048	0	0.0294118	0.0202703	0.0136364
CGDMR	2862	Bd1-1	Bd1	23245000	23245199	199	hyper	0.980769	0.0262009	0.0119048	0.0083682	0.00310559	0.0183824	0.0134048	0.631579	0	0.0212766	0	0	0	0	0.0111732	0.00680272	0	0.0121951	0.00869565	0.0105263	0.0199005
CGDMR	2865	Bd1-1	Bd1	23273900	23274499	599	hypo	0.0286885	0.96728	0.973776	0.986175	0.96577	0.969832	0.972441	0.0200893	0.810445	0.876033	0.82868	0.902439	0.857143	0.860611	0.00527241	0.059135	0.0234807	0.0163339	0.0592334	0.0494217	0.154743
CGDMR	2868	Bd1-1	Bd1	23311700	23311999	299	hyper	0.954545	0.315789	0	0	0.5625	0.222222	0.291667	0.0779221	0	0	0	0	0.0243902	0	0.00925926	0	0	0	0.00625	0.0131148	0.00555556
CGDMR	2870	Bd1-1	Bd1	23324100	23324799	699	hypo	0.0160858	0.969771	0.971609	0.959948	0.966087	0.979624	0.97514	0.00613497	0.586265	0.636103	0.638734	0.643735	0.527941	0.643972	0.00209644	0.00900901	0.0127971	0.0138391	0.00934244	0.0113398	0.0101095
CGDMR	2872	Bd1-1	Bd1	23342700	23343199	499	hyper	0.954897	0.00223714	0.0037594	0	0.00626305	0.00859107	0.00635593	0.747312	0.00552486	0.0230415	0	0	0.00956938	0.00600601	0.144618	0.00380228	0.0139535	0.00257069	0.00372671	0.0341382	0.00414938
CGDMR	2873	Bd1-1	Bd1	23365000	23365199	199	hyper	0.992674	0.116822	0.0792079	0	0.0222222	0.277228	0.203463	0.599432	0.00763359	0.00806452	0	0.0379747	0.0106952	0.0280374	0.0197802	0	0	0.00909091	0	0	0.00615385
CGDMR	2875	Bd1-1	Bd1	23379100	23379899	799	hyper	0.957974	0.0667434	0	0.00369004	0.0371517	0.0115108	0.00868307	0.766773	0.0145773	0.0060241	0.0052356	0.012024	0.00658979	0.0084317	0.0415956	0.0046225	0.00393701	0.003003	0.00166389	0.00363636	0.00276498
CGDMR	2877	Bd1-1	Bd1	23385300	23385499	199	hyper	0.788462	0	0	0	0.910112	0.929825	0	0	0.0196078	0	0	0.037037	0.0232558	0	0.00691244	0	0	0	0.00941177	0.00754717	0.00296736
CGDMR	2879	Bd1-1	Bd1	23393300	23394299	999	hypo	0.0130208	0.96868	0.957983	0.972622	0.969307	0.958422	0.971687	0.00853242	0.855932	0.826207	0.917318	0.865606	0.88429	0.827303	0.00957854	0.0229529	0.0282729	0.0401648	0.0315431	0.026404	0.0329519
CGDMR	2880	Bd1-1	Bd1	23395000	23395699	699	hyper	0.90378	0.0560081	0.00395257	0.104762	0.0240437	0.152882	0.143577	0.504854	0.0610932	0	0.0963855	0.0351759	0.25	0.184127	0.0339943	0.00258398	0.00826446	0	0	0.0220264	0.00434783
CGDMR	2881	Bd1-1	Bd1	23400200	23400399	199	hypo	0	0.927273	0.983051	0	0	1	0.5	0	0.520468	0.673611	0	0.00735294	0.636816	0.0970874	0.00294118	0.00700525	0.00361664	0	0.00215983	0.0131752	0.00817996
CGDMR	2883	Bd1-1	Bd1	23402700	23403099	399	hypo	0	0.852174	0.869565	0.00925926	0	0.906433	0	0.0149254	0.156757	0.209945	0.020979	0.00543478	0.178988	0.01	0.0032077	0.010101	0.00814664	0.00950119	0.010989	0.023622	0.00869565
CGDMR	2885	Bd1-1	Bd1	23414400	23414599	199	hypo	0.133333	0.926829	0.921569	0	0	0.282051	0.976744	0.00847458	0.22449	0.306931	0	0.04	0.107692	0.139073	0.0163399	0.00732601	0.015674	0.0434783	0	0	0.00204918
CGDMR	2886	Bd1-1	Bd1	23415800	23416199	399	hyper	0.963077	0.944444	0.0150376	0.839286	0.546763	0.954861	0	0.229665	0.465116	0	0.0410959	0.04	0.663265	0.00613497	0.011782	0.00784314	0.00446429	0.00647948	0	0.0128425	0.00501882
CGDMR	2889	Bd1-1	Bd1	23462300	23462499	199	hyper	0.81875	0.152174	0	0	0	0	0.0147059	0.0439024	0	0	0	0	0.025641	0.0106383	0.00504414	0.00702576	0	0	0	0.0243902	0.00684931
CGDMR	2896	Bd1-1	Bd1	23511900	23513099	1199	hypo	0.0127264	0.954955	0.925926	0.039807	0.922388	0.017438	0.0125392	0.012021	0.240698	0.046729	0.0150659	0.124634	0.00604839	0.00749766	0.00566943	0.00693802	0.00816326	0.00570776	0.00329489	0.00763359	0.00869061
CGDMR	2897	Bd1-1	Bd1	23513200	23513899	699	hypo	0.0121528	0.933786	0.894309	0.0944206	0.93709	0.148987	0.0994065	0.0100503	0.0704356	0.0354167	0.0206349	0.104335	0.0155148	0.0141468	0.00772002	0.00484653	0.00595745	0.00612423	0.00678887	0.00839161	0.00371901
CGDMR	2898	Bd1-1	Bd1	23529800	23530599	799	hypo	0.0188501	0.929228	0.955687	0.96317	0.943889	0.931567	0.876444	0.011236	0.47619	0.576803	0.644491	0.606529	0.523018	0.590226	0.00696864	0.00792951	0.0191693	0.0170068	0.0124451	0.0128012	0.0116383
CGDMR	2909	Bd1-1	Bd1	23624500	23624799	299	hypo	0.019802	0.00628931	0.98913	0.823529	0.952381	0.962264	0.974359	0.0138889	0.036036	0.746032	0.407407	0.545455	0.669291	0.79476	0	0.0233918	0.0136054	0.0271318	0.0105042	0.0180995	0.0324763
CGDMR	2916	Bd1-1	Bd1	23698600	23698799	199	hypo	0	0.678571	0.726027	0.714286	0.848485	0.714286	0.950495	0	0.00877193	0.0114943	0.0294118	0	0.011236	0.0289855	0	0	0.00505051	0	0	0.0217391	0.0137931
CGDMR	2918	Bd1-1	Bd1	23702400	23702599	199	hyper	0.916667	1	0.0909091	0.8	0	0.942308	0	0.142857	0.591549	0	0.222222	0	0.189189	0	0.0496689	0.00991501	0.0285714	0	0.142857	0.00546448	0.0105263
CGDMR	2919	Bd1-1	Bd1	23707800	23708199	399	hyper	0.802817	0.70297	0.0141343	0.0261097	0.027088	0.0116959	0.591449	0.0234807	0.0307692	0.00921659	0.00348432	0.00311526	0.0136187	0.034965	0.00537634	0.0105402	0.00884956	0.00717703	0.00386847	0.00933126	0.00311203
CGDMR	2922	Bd1-1	Bd1	23755400	23755799	399	hypo	0.0156986	0.020979	0.98243	0.964535	0.968349	0.967123	0.970033	0.00867679	0.0140281	0.8	0.744538	0.728033	0.644756	0.698539	0.00832342	0.00964187	0.0177936	0.0157835	0.0171131	0.0116897	0.00769231
CGDMR	2923	Bd1-1	Bd1	23789200	23789599	399	hyper	0.985507	0.976048	0.0117647	0.0672269	0.0208333	0.854037	0.00335571	0.141176	0.0275229	0.0724638	0	0.038835	0.0966387	0.00934579	0.0123457	0.0196078	0	0	0.00819672	0.0017094	0.00380228
CGDMR	2927	Bd1-1	Bd1	23806700	23807399	699	hyper	0.942712	0.912988	0.00712589	0.00818331	0.0080402	0.00236967	0.00593032	0.601488	0.612698	0.0035461	0	0.011583	0.00897666	0.00815494	0.00860303	0.0212691	0.00969305	0.00822368	0.00789663	0.0124095	0.0048
CGDMR	2929	Bd1-1	Bd1	23829700	23830099	399	hyper	0.85259	0.833142	0.00684931	0.00917431	0.0119332	0.00261097	0.00189036	0.140569	0.128467	0.00456621	0.0283688	0.0188679	0	0.0124378	0.00942408	0.0218778	0.0209424	0	0.0017452	0.00428265	0.0107527
CGDMR	2931	Bd1-1	Bd1	23830900	23832399	1499	hypo	0.0105079	0.00696056	0.976087	0.294737	0.163043	0.796388	0.0111607	0.0084317	0.0162791	0.34689	0.120419	0.0363636	0.377391	0.00928074	0.0110092	0.00421941	0.00548246	0.00332226	0.0139925	0.0096831	0.0134865
CGDMR	2936	Bd1-1	Bd1	23863300	23863499	199	hypo	0	0.0060241	0.904348	0.918367	0.870192	0	0.925	0.0153846	0.00746269	0.00502513	0	0.00574713	0.00777202	0.016129	0.0148148	0.00396825	0.00673401	0.0128205	0.011236	0.00655022	0
CGDMR	2940	Bd1-1	Bd1	23916300	23916499	199	hyper	0.86	0.666667	0	0.642857	0.456522	0.555556	0.396552	0.0104167	0.0136054	0	0	0.0243902	0.0365854	0	0	0.00743494	0	0	0.0211268	0.0137931	0
CGDMR	2961	Bd1-1	Bd1	24015600	24016199	599	hypo	0.0235294	0.00473934	0.966759	0.0697674	0.967378	0.00390625	0.990303	0.0078125	0.00896861	0.807882	0.0520833	0.375683	0	0.657868	0.00483092	0.00456621	0.00700935	0.00735294	0.00322841	0.00454546	0.00839092
CGDMR	2963	Bd1-1	Bd1	24018800	24018999	199	hyper	0.884615	0	0	0.5	NA	NA	0.325581	0.2125	0	0	0	NA	NA	0.037037	0.0104439	0	0	0	NA	NA	0.025
CGDMR	2964	Bd1-1	Bd1	24038500	24038899	399	hyper	1	0.968	0.0136986	0	0	0.995215	0.979094	0.40367	0.711217	0.0138889	0.0212766	0	0.732919	0.607251	0.00972763	0.0100908	0.0025	0.0162602	0	0.0183585	0.0182857
CGDMR	2969	Bd1-1	Bd1	24100700	24100899	199	hypo	0	0.92	0.958333	NA	0	0.0645161	0	0	0.0454545	0.25	NA	0	0	0	0.05	0.00952381	0.037037	0	0	0	0.00826446
CGDMR	2976	Bd1-1	Bd1	24188500	24188899	399	hyper	0.971223	0.0718954	0.04	0.965	0.972028	0.989247	0.96063	0.658537	0.0168067	0.0208333	0.663717	0.70297	0.894737	0.916667	0.0318841	0.0608828	0.0535714	0.0723404	0.0618557	0.0620155	0.0798969
CGDMR	2985	Bd1-1	Bd1	24236500	24236899	399	hyper	0.792683	0.532258	0	0.0465116	0	0.335821	0.477064	0.0532544	0.0387597	0.0138889	0	0.0123457	0.084507	0.145161	0.00689655	0.0077821	0	0	0.0222222	0.0187891	0.0251397
CGDMR	2986	Bd1-1	Bd1	24242700	24243199	499	hyper	0.943491	0.889819	0	0.976303	0.015748	0.969287	0.962851	0.761528	0.818854	0.0213904	0.840164	0.0257511	0.803977	0.782051	0.0113587	0.0306452	0.0022173	0.0328639	0.00536673	0.0126214	0.00898473
CGDMR	2987	Bd1-1	Bd1	24243300	24243999	699	hyper	0.901158	0.793673	0.00301205	0.978409	0.00507614	0.907005	0.901577	0.806156	0.316804	0.00310559	0.842273	0.0134454	0.775524	0.816327	0.0432489	0.0363263	0.0018797	0.0129908	0.00468384	0.0393305	0.0415031
CGDMR	2992	Bd1-1	Bd1	24323700	24324099	399	hyper	0.889151	0.00760456	0.00689655	0.0454545	0	0.881549	0.033033	0.367284	0.0112994	0	0.0540541	0	0.461538	0.0123457	0.0143885	0	0.0114286	0.0148148	0	0.0177059	0.00541712
CGDMR	2994	Bd1-1	Bd1	24328900	24329399	499	hypo	0.00793651	0.901768	0.966165	0.917073	0.901857	0.947222	0.949192	0.0197694	0.0174051	0.0106383	0.0168067	0.0138889	0.0162037	0.0346821	0.00817578	0.0216942	0.0019861	0.0056338	0.0130315	0.0113037	0.00933416
CGDMR	2999	Bd1-1	Bd1	24486000	24486199	199	hyper	0.818182	0	0	0.818182	0.730769	NA	1	0.295455	0	0	0.125	0.482759	0.8	0.380952	0.0298507	0	0	0.0714286	0.037037	0.111111	0.05
CGDMR	3003	Bd1-1	Bd1	24513900	24514299	399	hypo	0	0.957831	0.93956	0.760684	0.867704	0.843931	0.965608	0.0151976	0.133479	0.255605	0.106509	0.184524	0.144366	0.188912	0.00588235	0.00860215	0.0119454	0.0230179	0.0139594	0.0156006	0.0136546
CGDMR	3008	Bd1-1	Bd1	24556700	24556899	199	hyper	0.975309	0	0	0.454545	0	0.712121	0.957447	0.0263158	0.00943396	0.0133333	0	0.0235294	0.0119048	0.00943396	0.00798403	0.00374532	0.00512821	0.00826446	0.00367647	0.00293255	0.0103306
CGDMR	3010	Bd1-1	Bd1	24571200	24571699	499	hypo	0.0374532	0.907783	0.985246	0.0125	0.948525	0.00271003	0.00750751	0.0185615	0.326693	0.827957	0.00828157	0.858974	0.00672646	0.00813008	0.0119048	0.0276753	0.0098661	0.00886918	0.0214861	0.00492611	0.0043956
CGDMR	3016	Bd1-1	Bd1	24627400	24627899	499	hyper	0.929524	0.00665557	0.0114943	0.988839	0.00761035	0.979003	0.976583	0.748754	0.00571429	0	0.805112	0.00980392	0.849685	0.845083	0.0131579	0.0161491	0.0166945	0.00533808	0.00536193	0.0190889	0.0134666
CGDMR	3022	Bd1-1	Bd1	24713700	24713899	199	hyper	0.925926	0.2	0	NA	0	1	0	0.0133333	0.025641	0	0	0	0.0169492	0.00961539	0.0084507	0	0	0	0.0126582	0.0052356	0.00222717
CGDMR	3028	Bd1-1	Bd1	24746300	24746499	199	hyper	0.974026	0.151515	0	0.238095	0.815789	0.95122	0.957447	0.0229885	0	0	0.0172414	0.0217391	0	0.0188679	0.00842105	0	0	0.00632911	0.0112782	0.00341297	0.00297619
CGDMR	3029	Bd1-1	Bd1	24747000	24747499	499	hyper	0.956522	0.602941	0.0238095	1	0.47619	0.881818	0.894737	0.00573066	0.00903615	0	0	0.0324675	0.00727273	0.0283688	0.00845666	0.00922266	0.00380228	0.00746269	0	0.00609756	0.00288184
CGDMR	3032	Bd1-1	Bd1	24749700	24750399	699	hyper	0.94433	0.0238095	0.00653595	0.0169492	0.0078125	0.929612	0.819797	0.0168196	0.0121951	0.00520833	0	0	0.0106952	0.00701754	0.00600437	0.00509338	0.00759013	0.00966184	0.0112613	0.00556242	0.00328947
CGDMR	3043	Bd1-1	Bd1	24801600	24801899	299	hypo	0	0.910204	0.964602	0.00796813	0.00923077	0.005	0.0199557	0.00851064	0.10084	0.129808	0	0	0.0171429	0	0.00588235	0.00286533	0.0246914	0.019802	0.0196078	0.0148515	0.00485437
CGDMR	3045	Bd1-1	Bd1	24834800	24834999	199	hypo	0	0	1	0	0	0.125	0	0	0	0	0	0.125	0.333333	0.1	0.00464037	0.00902934	0.0159574	0	0.00694444	0.0338983	0.00306749
CGDMR	3046	Bd1-1	Bd1	24835100	24835299	199	hypo	0	0	0.896552	0	0.25	NA	0.85	0	0	0.297872	0	0.541667	NA	0.644444	0	0	0	0	0.126437	NA	0.0505618
CGDMR	3052	Bd1-1	Bd1	24881700	24881899	199	hyper	0.9	0.644068	0	NA	0	NA	0.047619	0.037037	0	0	NA	0	NA	0	0.00932401	0	0	NA	0	NA	0.0135747
CGDMR	3053	Bd1-1	Bd1	24884000	24884399	399	hypo	0.0125	0.895141	0.956044	1	0.698582	1	0.75	0.010929	0.0694444	0.0232558	1	0.0172414	1	0.0316456	0.00548446	0.00731707	0.013369	0	0.0185497	0	0.00844595
CGDMR	3054	Bd1-1	Bd1	24885000	24885299	299	hypo	0.0769231	0.863014	0.928571	NA	0	NA	0.0142857	0	0.352113	0.3125	NA	0	NA	0.0483871	0.00515464	0.0114943	0.011976	NA	0	NA	0.00302115
CGDMR	3058	Bd1-1	Bd1	24971300	24971499	199	hyper	0.826087	0.00892857	0.0188679	0	0	0	0.961538	0.185185	0.0232558	0.0740741	0	0	0	0.166667	0	0	0.0197368	0	0	0.047619	0.0143885
CGDMR	3067	Bd1-1	Bd1	25049300	25050199	899	hypo	0.00942761	0.958482	0.973418	0.00454546	0.0153846	0.00625	0.0108108	0.0100575	0.411131	0.172237	0	0.0131579	0.0206897	0.00970874	0.00791557	0.0133835	0.00671892	0	0.00328947	0.00634921	0.00398406
CGDMR	3072	Bd1-1	Bd1	25074600	25075099	499	hyper	0.959341	0.00327869	0.01	0.929006	0.00714286	0.974359	0.849962	0.364964	0.00677966	0	0.467787	0.00749064	0.459752	0.453596	0.0119887	0.00378788	0.00265252	0.0121495	0.00435414	0.00582751	0.0208239
CGDMR	3073	Bd1-1	Bd1	25076200	25076699	499	hyper	0.908938	0.0131004	0	0	0.00961539	0.921384	0.00671141	0.266467	0	0.0243902	0	0	0.576577	0.0142857	0.0122075	0.012285	0.0139535	0	0	0.0171026	0
CGDMR	3074	Bd1-1	Bd1	25079400	25080199	799	hypo	0.0200573	0.66886	0.975177	0.956522	0.74269	0.929095	0.914661	0.0078125	0.138211	0.483516	0.172414	0.145455	0.366412	0.309677	0.00445434	0.011243	0.00784656	0.00823723	0.0159433	0.0103152	0.0155083
CGDMR	3080	Bd1-1	Bd1	25112500	25112999	499	hypo	0.0107143	0.976819	0.988111	0.925466	0.972595	0.926011	0.0586592	0.0125786	0.842801	0.792651	0.731884	0.84375	0.768409	0.0454545	0.0125786	0.0247273	0.00676437	0.076087	0.0600858	0.0410959	0
CGDMR	3081	Bd1-1	Bd1	25114200	25114399	199	hypo	0	0.956044	0.954198	1	0.99446	0.963576	0	0.025	0.899441	0.923077	0.923077	0.969492	0.893855	0.0238095	0	0.00646552	0.210256	0.0804598	0.135593	0.00790514	0.0701754
CGDMR	3088	Bd1-1	Bd1	25131400	25131599	199	hyper	0.928571	0	0	0	0	0	0	0.0310078	0	0	0	0	0	0	0.00931677	0.0189873	0	0	0	0.0120482	0
CGDMR	3093	Bd1-1	Bd1	25135000	25135199	199	hyper	1	0.404762	0.130435	1	0.571429	0.576923	0.853659	0	0	0	0	0	0	0	0.00775194	0	0	0	0	0	0
CGDMR	3095	Bd1-1	Bd1	25149700	25150099	399	hypo	0.00925926	0.00423729	0.897959	0.0882353	0.0165289	0.0204082	0	0	0	0.592593	0.0357143	0	0	0	0.00392157	0	0	0	0.01	0	0.00787402
CGDMR	3105	Bd1-1	Bd1	25207700	25207899	199	hyper	0.969697	0	0.0588235	0.931298	0.0144928	0.959184	0.047619	0.00892857	0.0526316	0	0.61236	0.0727273	0.0833333	0.0181818	0.0165975	0	0	0.013986	0	0.0183486	0.0166667
CGDMR	3107	Bd1-1	Bd1	25213600	25213799	199	hyper	0.979167	0.0388889	0.0366972	0.827338	0.909953	0	0.0505051	0.80597	0.0512821	0.0410959	0.246377	0.493056	0.0185185	0	0.00526316	0.0251799	0.00621118	0.00719425	0.0107527	0	0.010101
CGDMR	3115	Bd1-1	Bd1	25257500	25257799	299	hypo	0	0.852941	0.956522	0.933333	1	1	0.967742	0	0.304348	0.461538	0.857143	0.6	1	0.538462	0.0277778	0	0.047619	0.0545455	0	0	0.0225989
CGDMR	3116	Bd1-1	Bd1	25259000	25259199	199	hypo	0.0134048	0.31358	0.758974	0.751553	0.704348	0.538745	0.603037	0.0137931	0.0144404	0.0140845	0.0197368	0.0125	0.0129199	0.00980392	0.00524934	0.00600601	0.0242424	0.02	0	0.0258824	0.00527705
CGDMR	3119	Bd1-1	Bd1	25267100	25267399	299	hyper	0.905405	0	0	0	0.909722	0.763636	0	0.604167	0	0.0714286	0	0.855072	0.318182	0.0169492	0.142202	0.00826446	0	0	0.0712695	0	0.0101695
CGDMR	3122	Bd1-1	Bd1	25291000	25291599	599	hyper	0.865169	0.267327	0.00335571	0.138158	0.926126	0.743539	0.936652	0.0160256	0.0204461	0.0258398	0.00649351	0.0139752	0.0123077	0.0344828	0.00905797	0.0046083	0.0122222	0.0125628	0.00455433	0.00384615	0.0037234
CGDMR	3131	Bd1-1	Bd1	25359400	25359799	399	hypo	0	0.271255	0.952	0	0.976271	0	0.852941	0.0200501	0.0200803	0.44898	0	0.257042	0.032967	0.0968858	0.00862999	0	0.0220386	0	0.002849	0	0.00308642
CGDMR	3132	Bd1-1	Bd1	25362700	25362899	199	hypo	0.00740741	0.00607903	0.747706	0	0.227679	0	0.30254	0.011583	0	0.0248963	0	0.0126582	0.00653595	0.0217391	0	0.003367	0.00485437	0	0	0.00775194	0.00257069
CGDMR	3133	Bd1-1	Bd1	25363100	25363299	199	hypo	0.0150376	0.0733591	0.866667	0	0	0.0205128	0.00555556	0.0212766	0.0405904	0.0217391	0	0.0348837	0.0049505	0.0104167	0	0.00641026	0	0	0	0.0178571	0.00395257
CGDMR	3135	Bd1-1	Bd1	25363600	25363799	199	hypo	0.0252101	0.910448	0.982456	0	0	0.0123457	0.0131579	0.0190476	0.119403	0.262295	0	0	0	0	0	0.0320856	0.00662252	0	0.0153846	0.00462963	0.00271739
CGDMR	3136	Bd1-1	Bd1	25363900	25364199	299	hypo	0.00970874	0.949045	0.984496	0	0.30625	0.2	0.024055	0	0.092219	0.147651	0	0	0.0152284	0.00619195	0.00543478	0.0156951	0.00806452	0	0	0.0115385	0.00220751
CGDMR	3139	Bd1-1	Bd1	25364800	25365299	499	hypo	0.00735294	0.919634	0.966038	0.0439189	0.819843	0.00623701	0.00532623	0.00606061	0.553221	0.305389	0.012987	0.0325581	0.00332226	0.00465116	0.00355872	0.00685871	0.00167785	0.00696056	0.0139082	0.00671141	0.00241741
CGDMR	3140	Bd1-1	Bd1	25365500	25365899	399	hypo	0.0491803	0.954044	0.964126	0	0.0692308	0	0.00334448	0.0250447	0.587563	0.533762	0	0.00564972	0.0167598	0.0120192	0.00858779	0.0039818	0.00721501	0	0	0.00689655	0.00357143
CGDMR	3141	Bd1-1	Bd1	25366000	25366299	299	hypo	0.251534	0.943182	0.993056	0	0.148148	0.222222	0	0.0224215	0.696078	0.777251	0	0.0245902	0.0185185	0	0.00165289	0.00154679	0.00362319	0.0106383	0.00980392	0.00234742	0
CGDMR	3142	Bd1-1	Bd1	25374200	25374399	199	hyper	0.843478	0.039604	0	0.623853	0.514286	0.117073	0.731928	0.025	0.0192308	0	0	0.0172414	0	0.0625	0.00893997	0.00389105	0.0122699	0.00340136	0.00276243	0.00804829	0.0078534
CGDMR	3150	Bd1-1	Bd1	25404600	25404999	399	hypo	0.012987	0.768061	0.988372	0.92126	0.981928	0.946667	0.83	0.00898876	0.0759804	0.153571	0.0758621	0.401254	0.0747423	0.148241	0.00358423	0.00792752	0.00340715	0.0144509	0.0153531	0.0180723	0.00180018
CGDMR	3154	Bd1-1	Bd1	25467000	25467199	199	hyper	0.852941	0.538462	0	NA	0.625	0.361111	0.478261	0	0	0	NA	0	0	0	0.00598802	0.00357143	0.00518135	0	0.0134228	0	0.00909091
CGDMR	3155	Bd1-1	Bd1	25468300	25468499	199	hypo	0	0.272727	0.789474	NA	0.818182	1	0.924528	0	0	0.475	NA	0.347826	0.555556	0.43299	0.00952381	0.0512821	0.012987	NA	0	0.111111	0.0373444
CGDMR	3156	Bd1-1	Bd1	25477800	25477999	199	hypo	0.0263158	0.0625	1	1	0.903226	0.909091	0.631579	0.1	0.206897	0.48	0.5	0.571429	0.447368	0.172414	0.0564516	0.194805	0.0277778	0.25	0.165468	0.0162602	0.0864198
CGDMR	3158	Bd1-1	Bd1	25482600	25483099	499	hypo	0.0130246	0.980865	0.975225	0.00476191	0.976301	0.0257649	0.974785	0.0188235	0.45749	0.436916	0	0.502375	0.00295858	0.523077	0.0214133	0.0317213	0.0335731	0	0.00780488	0.0136157	0.0917529
CGDMR	3160	Bd1-1	Bd1	25501600	25501799	199	hypo	0	0.0425532	0.853659	0.666667	1	0.707692	0.89011	0.0277778	0	0.611111	0.333333	0.826087	0.413043	0.75	0.0172414	0	0.0222222	0.037037	0.09375	0.0434783	0.027027
CGDMR	3166	Bd1-1	Bd1	25528200	25528399	199	hypo	0.11	0.536585	0.887755	0.910714	0.889503	0.492754	0.914798	0.186047	0.0394737	0.372549	0.389262	0.143646	0.0666667	0.352381	0.0133929	0.00391389	0.031348	0.0121547	0.0123762	0.00923787	0.0163711
CGDMR	3167	Bd1-1	Bd1	25529600	25529999	399	hypo	0.0152284	0.220339	0.918519	0.985366	0.480769	0.263736	0.173333	0.0102041	0.00961539	0.829016	0.856338	0.030303	0.0352941	0	0.00428265	0.117825	0.0268949	0.0183333	0.0981595	0.141631	0.0671141
CGDMR	3173	Bd1-1	Bd1	25612600	25612799	199	hyper	0.988327	0	0.08	0.0666667	0.0694444	0.0227273	0.022831	0.75641	0.038961	0	0	0.0434783	0.00934579	0.0347222	0.00749064	0.00487805	0.0967742	0.0536913	0.0747664	0.004	0.0200573
CGDMR	3174	Bd1-1	Bd1	25619600	25619999	399	hyper	0.968847	0.00993378	0.0211268	0.0101351	0.0219378	0.0136986	0.0148148	0.718519	0.0218818	0.0288462	0	0.0121951	0.019943	0.0132075	0.0155642	0.00906344	0.0458716	0.0144928	0	0	0.0200501
CGDMR	3175	Bd1-1	Bd1	25622500	25622699	199	hyper	1	0.233333	0.205882	0.390244	0.202899	0.219512	0	0.772727	0.138889	0	0.5	0.225	0.0769231	0.0681818	0	0	0.0408163	0	0.010989	0	0
CGDMR	3176	Bd1-1	Bd1	25622800	25623299	499	hyper	0.972061	0.00842105	0.00334448	0.0222222	0	0.0118203	0.0462428	0.368421	0	0.0195122	0	0.005	0	0.00904977	0.00464807	0.00257069	0.0110497	0.00892857	0.00692841	0.00837989	0.0128411
CGDMR	3178	Bd1-1	Bd1	25658400	25658899	499	hypo	0.0253731	0.799805	0.893204	0.827303	0.892857	0.707665	0.888046	0.0185471	0.0672854	0.0899471	0.0275049	0.0272615	0.0187019	0.0184426	0.0134953	0.014174	0.0122951	0.0071048	0.00898876	0.0070922	0.00631199
CGDMR	3179	Bd1-1	Bd1	25670900	25671099	199	hyper	0.769585	0	0	0	0	0	0.0217391	0.0212014	0	0	0	0	0	0	0.00524476	0	0.0217391	0.105263	0	0	0
CGDMR	3182	Bd1-1	Bd1	25674000	25674199	199	hyper	0.764045	0.534247	0	0.555556	0	0.736842	0	0	0	0.0344828	0	0.04	0	0	0.0247748	0.00869565	0	0	0	0	0.00221239
CGDMR	3185	Bd1-1	Bd1	25708400	25708799	399	hypo	0.011236	0.809651	0.878453	0.945148	0.863787	0.867052	0.947891	0.0164609	0.484472	0.515152	0.727273	0.566667	0.604762	0.732809	0	0.0274151	0.00184843	0.00723327	0.0218487	0.00567537	0.0109244
CGDMR	3186	Bd1-1	Bd1	25710200	25710899	699	hyper	0.924144	0.00580431	0.0136187	0.0159744	0.00562588	0.971024	0.971606	0.433028	0.0105932	0.004329	0.00970874	0.0101351	0.460033	0.453266	0.0136426	0.00454546	0.0140845	0.0121654	0.00282486	0.00678295	0.0105485
CGDMR	3194	Bd1-1	Bd1	25779600	25779899	299	hyper	0.96	0.981132	0	1	0.991379	0.917582	0.901042	0.56875	0.719178	0	0.393443	0.732759	0.62585	0.68	0.0133715	0.00789474	0.00826446	0.026178	0.00531915	0.0241611	0.0111266
CGDMR	3198	Bd1-1	Bd1	25801400	25801599	199	hypo	0.0777778	0.962766	0.977778	1	1	0.975104	0.978723	0.117647	0.630137	0.941176	0.857143	1	0.644444	0.75	0.0235294	0.0128755	0.0163934	0.0454545	0.0322581	0.0128205	0.00408163
CGDMR	3206	Bd1-1	Bd1	25844600	25845199	599	hypo	0.00703606	0.903986	0.931579	0.92618	0.931124	0.900575	0.00398406	0.00637959	0.0902004	0.0689655	0.114566	0.0861183	0.0353893	0.00266312	0.00742115	0.0120635	0.00759878	0.00977778	0.0048376	0.0134639	0.00317209
CGDMR	3210	Bd1-1	Bd1	25859700	25859899	199	hyper	0.936842	0	0	0.983607	0	0	0.93617	0.5	0	0	0.478723	0.0666667	0	0.423529	0.00518135	0	0	0.0220588	0	0	0.0152439
CGDMR	3218	Bd1-1	Bd1	25893600	25894499	899	hypo	0.00961539	0.9744	0.991643	0.969419	0.972743	0.966851	0.973378	0	0.800399	0.817869	0.85034	0.863539	0.754639	0.79802	0.00924974	0.0177665	0.0128586	0.0280374	0.0121107	0.012188	0.0255624
CGDMR	3220	Bd1-1	Bd1	25931600	25931799	199	hypo	0	0.454545	0.916667	0.5	0	0	0.909091	0	0.010101	0	0	0	0	0.0263158	0.00381679	0.00632911	0.030303	0	0.0163934	0	0
CGDMR	3225	Bd1-1	Bd1	25969800	25969999	199	hyper	0.948905	0.010101	0.037037	0	0.0851064	0	0.0512821	0.745763	0.0271739	0.0238095	0	0.0471698	0.0138889	0.0361446	0.023544	0.00476191	0	0.0273973	0.00961539	0.00549451	0
CGDMR	3227	Bd1-1	Bd1	25983900	25984499	599	hypo	0.0139535	0.894793	0.915194	0	0.84922	0.944809	0.961165	0.0116279	0.518868	0.463415	0	0.553648	0.422857	0.569161	0.0158416	0.0431245	0.0322581	0	0.0327422	0.0332975	0.011254
CGDMR	3240	Bd1-1	Bd1	26103100	26103399	299	hypo	0.0204082	0.571429	0.947368	0	0.555556	0.870968	0.15	0	0.148148	0.352941	1	0	0.447368	0.0517241	0.0231481	0.0078125	0	0	0.0869565	0	0.012987
CGDMR	3242	Bd1-1	Bd1	26120400	26121199	799	hypo	0.036036	0.980254	0.98145	0.970248	0.963855	0.977554	0.97678	0.0375587	0.828938	0.812303	0.874433	0.875294	0.822452	0.842291	0.0060423	0.012003	0.0113688	0.0136986	0.0148595	0.0112169	0.0105386
CGDMR	3248	Bd1-1	Bd1	26162600	26162999	399	hypo	0.0340479	0.979592	0.783333	0.970175	0.566011	0.0175439	0.979762	0.015025	0.645439	0.0491803	0.0812808	0.011811	0.0045977	0.302365	0.0186757	0.0194805	0.00480769	0.0151899	0.0045045	0.00961539	0.149163
CGDMR	3257	Bd1-1	Bd1	26210900	26211199	299	hypo	0.040724	0.726776	0.96875	1	0.673077	0.704545	0.617188	0.0149254	0.0124611	0.0227273	0.0909091	0.0183486	0.0163934	0.00760456	0.00548697	0.00323102	0.0134529	0	0.00302115	0	0.00671141
CGDMR	3258	Bd1-1	Bd1	26224100	26224299	199	hypo	0.0555556	0.0909091	0.9	0.5	0.769231	0	0.625	0	0.025641	0	0	0	0	0	0.0078125	0	0.0170455	0	0.0253165	0	0.0114943
CGDMR	3265	Bd1-1	Bd1	26278700	26279099	399	hypo	0.00900901	0.947368	0.994083	0	0.958084	0.0530303	0.698876	0.0193237	0.75	0.807692	0	0.881148	0.0307692	0.166667	0.0046168	0.0192503	0.0171569	0.0127877	0.0324544	0.00373134	0.00782123
CGDMR	3266	Bd1-1	Bd1	26281400	26281699	299	hypo	0.00334448	0.958506	0.992308	0.989362	0.980237	0.97491	0.957198	0.0326087	0.59276	0.16129	0.228916	0.563786	0.522088	0.625	0.0112641	0.0185529	0.00284091	0.0123457	0.0131827	0.0100503	0.0159744
CGDMR	3267	Bd1-1	Bd1	26283600	26283799	199	hypo	0	0.515152	0.961538	0.555556	0.625	0.527273	0.795918	0.0196078	0.0333333	0.05	0	0	0.0833333	0.0512821	0	0	0	0	0	0	0.00595238
CGDMR	3270	Bd1-1	Bd1	26310000	26310799	799	hyper	0.970464	0.961779	0.00634921	0.970639	0.946809	0.969799	0.925227	0.168675	0.693878	0	0.571429	0.853873	0.68538	0.227552	0.00891266	0.00589536	0.00258398	0.00921659	0.0238411	0.00814996	0.00196657
CGDMR	3274	Bd1-1	Bd1	26318600	26318799	199	hyper	0.854167	0.428571	0	0	0.529412	0.666667	0.391304	0.1	0	0	0	0.125	0	0.0555556	0.0541872	0	0	0	0	0	0
CGDMR	3276	Bd1-1	Bd1	26321300	26322099	799	hyper	0.956835	0.0151679	0.00865801	0.00208768	0.00964187	0.0117096	0.00552486	0.382075	0.00681431	0.0120482	0.010582	0.0257426	0.00550459	0.00763359	0.0327232	0.00412797	0	0.0110865	0.00319489	0.00461894	0.00579374
CGDMR	3277	Bd1-1	Bd1	26330700	26330899	199	hypo	0.0952381	0.636364	1	0.705882	1	0.607143	0.8	0	0	0.285714	0	0.5	0.0769231	0.5	0.00990099	0	0.0384615	0.010101	0.023622	0.008	0.0210526
CGDMR	3278	Bd1-1	Bd1	26358700	26358899	199	hypo	0	0.884013	0.886792	0.915094	0.912162	0.908197	0.944444	0.0384615	0.39207	0.192053	0.492701	0.579505	0.557143	0.481928	0	0.0153139	0.0239808	0.0174622	0.0163728	0.0253165	0.00859599
CGDMR	3283	Bd1-1	Bd1	26435700	26435899	199	hypo	0.0869565	0.612903	0.904762	0.745763	0.846154	0.47619	0.789474	0	0	0	NA	0	0	0	0.176471	0.183099	0.175258	0.27451	0.148571	0.246377	0.291339
CGDMR	3287	Bd1-1	Bd1	26456300	26456999	699	hypo	0.0101946	0.975418	0.97556	0.98377	0.953089	0.964377	0.94761	0.0142857	0.758847	0.790404	0.858182	0.825342	0.696817	0.773385	0.0110497	0.00625434	0.0193424	0.0209482	0.0108147	0.0182395	0.0140337
CGDMR	3291	Bd1-1	Bd1	26501900	26502599	699	hypo	0.0213144	0.972311	0.918812	0.971981	0.968407	0.971903	0.973534	0.0277186	0.64443	0.123153	0.690165	0.443089	0.641618	0.659629	0.00557621	0.00220167	0.00173611	0.00543478	0.00900225	0.0111524	0.00837696
CGDMR	3292	Bd1-1	Bd1	26502800	26502999	199	hypo	0.0625	0.953125	0.944444	0.818182	0.333333	0.9375	0.888889	0	0.666667	0.5	0.8	0	0.692308	0.75	0	0.00649351	0	0	0	0.012987	0.0107527
CGDMR	3297	Bd1-1	Bd1	26524300	26524499	199	hypo	0.0202703	0	0.983871	0.0188679	0.00609756	0.0168067	0	0	0.00606061	0.767677	0.0119048	0	0.0210526	0	0.00954654	0.00257732	0.00282486	0	0.00555556	0	0.00790514
CGDMR	3301	Bd1-1	Bd1	26546700	26546899	199	hyper	0.870748	0	0	1	0.482759	0	0	0.025641	0	0	0	0	0	0	0.00284091	0	0.0119048	0	0	0	0
CGDMR	3304	Bd1-1	Bd1	26583400	26583599	199	hypo	0	0.666667	1	NA	0.684211	0.384615	0.510638	0.02	0.0178571	0	NA	0.0833333	0	0.0136986	0.00990099	0.00458716	0.0105263	NA	0.00787402	0.0229885	0.00326797
CGDMR	3306	Bd1-1	Bd1	26585400	26585799	399	hypo	0	0.860465	0.866667	0.818182	0	0.719298	0.703125	0	0.0588235	0	0	0	0	0	0.00742574	0.00320513	0	0.0405405	0	0	0
CGDMR	3307	Bd1-1	Bd1	26622800	26622999	199	hypo	0.105263	0.94186	1	1	0.875	1	0.925	0	0.756098	1	1	0.75	0.777778	0.809524	0.0227273	0.0184049	0.0285714	0	0	0.0505051	0.0232558
CGDMR	3308	Bd1-1	Bd1	26623500	26623699	199	hypo	0	0.00826446	0.863636	0.904762	0	0	0	0	0.0277778	0.725	0.5	0	0	0	0.016129	0.00606061	0.00877193	0.00909091	0	0	0
CGDMR	3309	Bd1-1	Bd1	26631500	26631999	499	hyper	0.907407	0.952308	0.0296296	0.975728	0.978044	0.965969	0.969506	0.614601	0.727397	0.0178571	0.779497	0.902357	0.599338	0.725615	0.0212431	0.00987013	0.0106383	0.00937766	0.0180481	0.0140909	0.0107105
CGDMR	3310	Bd1-1	Bd1	26642500	26642999	499	hypo	0.0169903	0.65431	0.932462	0.0133929	0.873116	0.798329	0.454842	0.00990099	0.1837	0.233227	0	0.193206	0.188908	0.0895742	0.0119522	0.0332248	0.0276074	0.00625	0.0252525	0.0466786	0.0162162
CGDMR	3320	Bd1-1	Bd1	26770400	26770699	299	hyper	0.898734	0.0723684	0.0125786	0	0.0108696	0	0.165289	0.121212	0.0151515	0	0.125	0	0	0.138889	0.0169492	0.0146628	0	0	0	0.00645161	0.00625
CGDMR	3325	Bd1-1	Bd1	26795600	26795799	199	hypo	0.0714286	0.5	0.928571	0	0	0.0625	0	0	0	0	0	0	0.0588235	0.0322581	0	0	0.03125	0	0	0	0.0240964
CGDMR	3328	Bd1-1	Bd1	26808800	26809299	499	hypo	0	0.756447	0.956311	0	0.947917	0.875486	0.91921	0.00719425	0.0709877	0.152074	0	0.0335196	0.015748	0.241681	0.00250627	0.00892857	0.0121359	0.00377358	0.021544	0.0107914	0.0456693
CGDMR	3330	Bd1-1	Bd1	26812400	26812599	199	hyper	0.875	0.794872	0.0833333	0.923077	0.0114943	0.88	0.937888	0.421687	0.467153	0.133333	0.25	0.0204082	0.545455	0.621118	0.0136519	0	0	0	0	0.0523256	0.0128535
CGDMR	3331	Bd1-1	Bd1	26823700	26824399	699	hyper	0.928246	0.0127157	0.00578035	0.303571	0.015528	0.0121507	0.0078329	0.25124	0.0147059	0	0.141818	0.0262009	0.0219966	0.0264151	0.0197842	0.00932568	0.00609756	0.00625978	0.0102041	0.0223518	0.040568
CGDMR	3332	Bd1-1	Bd1	26824500	26824799	299	hyper	0.943262	0.0074813	0	0.855072	0.0411985	0.00680272	0	0.0933661	0.0108401	0.015625	0.0921053	0.016129	0.00694444	0	0.00636943	0.00801282	0	0.00606061	0.00266667	0	0
CGDMR	3338	Bd1-1	Bd1	26887100	26887399	299	hypo	0	0.731481	0.987342	0.32	0.84375	0.272727	0.707317	0	0	0	0	0	0	0	0.00568182	0.00623053	0.0194805	0.00367647	0.00711744	0	0
CGDMR	3342	Bd1-1	Bd1	26920300	26921199	899	hypo	0.013369	0.970879	0.981366	0.0298507	0.972578	0.972087	0.982794	0.0126582	0.644015	0.692478	0.126789	0.715898	0.676573	0.650746	0.0226757	0.0542412	0.174221	0.122699	0.0601093	0.0738299	0.120813
CGDMR	3352	Bd1-1	Bd1	26981600	26981799	199	hypo	0	0	0.885714	0	0	0.047619	0.037037	0.0163043	0	0.5875	0	0	0	0.0267857	0.00956938	0.00479616	0.0888889	0.00595238	0	0	0.00326797
CGDMR	3355	Bd1-1	Bd1	27018600	27019199	599	hypo	0.0190996	0.792291	0.934978	0.694818	0.908578	0.879326	0.844601	0.0105541	0.0593407	0.21147	0.0329218	0.0626305	0.147727	0.154599	0.00796178	0.00953895	0.0128205	0	0.00952381	0	0.00768049
CGDMR	3364	Bd1-1	Bd1	27082300	27082599	299	hyper	0.952957	0.00992064	0.0113208	0.00319489	0.00809062	0.00673401	0.00582242	0.327014	0.00367647	0.0127389	0	0.00537634	0.00328947	0	0.00656045	0.00881057	0.018315	0	0.0161551	0.00656455	0.00380228
CGDMR	3365	Bd1-1	Bd1	27084800	27085199	399	hyper	0.948387	0.0188679	0.0344828	0.0465116	0.0227273	0	0	0.641026	0	0.037037	0	0	0.0645161	0.0294118	0.0250965	0	0.00719425	0	0	0.0122699	0.00384615
CGDMR	3369	Bd1-1	Bd1	27099800	27100199	399	hypo	0.0151515	0.969697	1	1	0.974684	0.988764	0.776316	0.0363636	0.904762	0.917647	0.966667	0.935484	0.870968	0.802817	0.011236	0.0106635	0.00650759	0.00611621	0.0120069	0.0127479	0.00967118
CGDMR	3371	Bd1-1	Bd1	27109000	27109699	699	hypo	0.0212014	0.972851	0.985019	0.946128	0.976401	0.939683	0.962094	0.00371747	0.861905	0.881119	0.881057	0.89527	0.810811	0.815057	0	0.0102762	0.017801	0.00697674	0.0330912	0.0101758	0.0078341
CGDMR	3383	Bd1-1	Bd1	27204600	27204799	199	hypo	0.0243902	0.0756303	0.906977	0	0	0.5	0.0178571	0.00990099	0	0.0533333	0	0	0.0340909	0	0.00518135	0.0122951	0.0374332	0	0.0327869	0.0689655	0
CGDMR	3384	Bd1-1	Bd1	27206800	27206999	199	hypo	0.111111	0	0.956522	0	0	0.931507	0.0136986	0.0136986	0	0.2	0	0.027027	0.23913	0	0.00522193	0	0.00970874	0	0.0078125	0.0310881	0.00455581
CGDMR	3387	Bd1-1	Bd1	27208300	27208499	199	hypo	0.0868825	0.0234375	0.877888	0.513078	0.172285	0.00722022	0.727273	0.0160858	0.00294985	0.0232558	0.0181818	0.0075188	0.00684931	0.0532725	0.00646204	0.00856164	0.0191693	0.00793651	0	0	0.0113452
CGDMR	3392	Bd1-1	Bd1	27261400	27261599	199	hypo	0.0125	0.866142	0.83908	0.54902	0.892308	0.4	0.877358	0.0123457	0.00613497	0.00549451	0.00719425	0.0254237	0.00438597	0	0.00517241	0.00884956	0	0.0105263	0.011236	0	0.0124224
CGDMR	3398	Bd1-1	Bd1	27332700	27333199	499	hyper	0.895044	0.00740741	0	0.805707	0.00263852	0.00772201	0.00244798	0.732484	0.00696056	0.00740741	0.378641	0.0146341	0.00694444	0.00628931	0.0192308	0.00779221	0.012474	0.0146699	0.00493827	0.00608519	0.0182599
CGDMR	3401	Bd1-1	Bd1	27347400	27347599	199	hyper	0.972414	0	0.0769231	0	0	0	0	0.473451	0	0.027027	0	0	0	0	0.00493827	0	0.0185185	0	0	0	0
CGDMR	3409	Bd1-1	Bd1	27372500	27372999	499	hypo	0.0188679	0.938983	1	0.954545	0.953846	0.941799	0	0.0410959	0.746951	0.849206	0.865169	0.720339	0.767442	0	0.0021645	0.00841908	0.0172043	0.00290698	0.0021322	0.00708383	0
CGDMR	3410	Bd1-1	Bd1	27373200	27373399	199	hypo	0.0217391	0.969697	0.96	0.987342	0.957746	0.964912	0	0.0359712	0.906883	0.955882	0.947368	0.916667	0.961039	0.03125	0	0.00763359	0.0119658	0.00505051	0.00839329	0.00443131	0.00481928
CGDMR	3413	Bd1-1	Bd1	27411600	27411899	299	hyper	0.954545	0.932432	0.0606061	0.692308	0.411765	0	0	0	0.0276243	0.0140845	0	0.0322581	0.0153846	0.037037	0.00574713	0.00404858	0.00480769	0	0	0.0196078	0.00974026
CGDMR	3416	Bd1-1	Bd1	27432600	27433899	1299	hypo	0.0413613	0.91432	0.97954	0.945641	0.96558	0.00519143	0.960594	0.043956	0.622324	0.68259	0.662408	0.678112	0.00937207	0.639675	0.0171797	0.00718328	0.0339977	0.00976909	0.00829082	0.0133556	0.00818527
CGDMR	3421	Bd1-1	Bd1	27464400	27464699	299	hyper	0.896552	0.00564972	0.0666667	0.245614	0.508197	0.336283	0.00952381	0.0078125	0	0	0.047619	0	0.0204082	0	0.00209205	0	0.00561798	0.00549451	0.016129	0.00243902	0
CGDMR	3422	Bd1-1	Bd1	27464800	27464999	199	hyper	0.916667	0	0	0	0	0.166667	0	0.0280374	0.037037	0.05	0	0	0	0.02	0.0023753	0	0	0	0	0.0213904	0.00917431
CGDMR	3425	Bd1-1	Bd1	27465800	27466099	299	hyper	0.973684	0.507692	0	0	0.171171	0.434211	0.112069	0	0.0101523	0.0192308	0	0	0	0.0129032	0.00765306	0	0.00884956	0.00621118	0.00327869	0	0.00660066
CGDMR	3426	Bd1-1	Bd1	27466300	27466599	299	hyper	1	0.512821	0.0416667	0	0	0.206897	0.297297	0.0169492	0.0217391	0	0	0	0	0	0.00954654	0.00653595	0.0144928	0	0	0	0
CGDMR	3427	Bd1-1	Bd1	27472900	27473299	399	hyper	0.854386	0.00229885	0.00431035	0.0126582	0	0.0302376	0.00738916	0.0491803	0.0103627	0	0.0434783	0.00763359	0	0.0123457	0.0403633	0.00609756	0.00226244	0.003663	0.00193424	0.00604595	0.00615385
CGDMR	3428	Bd1-1	Bd1	27474400	27474899	499	hypo	0.0200401	0.951567	0.996169	0.977273	0.923841	0.981859	0.947368	0.00819672	0.0138889	0.214286	0.314655	0.109312	0.0138408	0.0268456	0.00500835	0.00249688	0.00945946	0.00598802	0.00681044	0.0142993	0.00828157
CGDMR	3429	Bd1-1	Bd1	27476000	27476199	199	hypo	0	0	1	0	0	1	0	0	0	0	0	0	0	0	0	0.0377358	0	0	0	0	0.00787402
CGDMR	3432	Bd1-1	Bd1	27495200	27495599	399	hyper	0.94269	0.0148515	0.0197628	0.950321	0.951351	0.28882	0.00468384	0.260223	0	0.0242424	0.52	0.580952	0.0199005	0.0117188	0.00925212	0.00192308	0.00476191	0.0104862	0.0114943	0.00308642	0.00997506
CGDMR	3433	Bd1-1	Bd1	27500000	27500399	399	hypo	0.037037	0.890957	0.854305	0.891892	0.900826	0	0.786885	0.0141844	0.153374	0.120567	0.114286	0.0925926	0.0204082	0.123711	0.0192308	0.00875657	0.00487805	0	0.0158983	0.0122324	0.00638468
CGDMR	3437	Bd1-1	Bd1	27526600	27526799	199	hypo	0.0740741	0	0.821429	0	0.111111	0	0	0	0	0.285714	0	0	0	0	0.00862069	0.00492611	0	0.0625	0	0	0
CGDMR	3439	Bd1-1	Bd1	27528000	27528299	299	hyper	0.980198	0.371429	0.102564	0	NA	0.391304	0	0.03125	0	0.0172414	0	NA	0	0	0.0117371	0.00568182	0.00438597	0	0	0.0288462	0
CGDMR	3440	Bd1-1	Bd1	27528400	27528599	199	hyper	0.978022	0	0	NA	0	0.0384615	0	0.0105263	0	0	NA	0	0.2	0	0.00423729	0.0151515	0	NA	0	0.05	0
CGDMR	3445	Bd1-1	Bd1	27539700	27540099	399	hypo	0.00735294	0.915385	0.977419	0.9319	0.914591	0.943299	0.924242	0.00584795	0.2749	0.406349	0.376271	0.476987	0.432612	0.202512	0.004914	0.0282627	0.00308166	0.0230061	0.0255611	0.0149371	0.0130048
CGDMR	3448	Bd1-1	Bd1	27562200	27562399	199	hyper	0.961783	0	0.0416667	0	0	0.131579	0.0625	0.336634	0	0	0	NA	0	0	0.0408526	0.00840336	0	0	0	0.0233918	0.00689655
CGDMR	3450	Bd1-1	Bd1	27602000	27602699	699	hyper	0.95279	0.00520833	0.00692042	0	0.025641	0.0157233	0.00549451	0.0193299	0.00295421	0.00865801	0	0.0209059	0.0039604	0.00856164	0.00662252	0.00532269	0.00752587	0.0117994	0.00821018	0.00176835	0.00522778
CGDMR	3451	Bd1-1	Bd1	27603200	27603499	299	hypo	0.0179641	0.938144	0.933333	0.978723	0.88125	0.966717	0.961686	0	0.130045	0.160256	0.102857	0.155556	0.265823	0.295302	0.00808625	0.00465116	0.00970874	0.00743494	0.0379147	0.00983607	0
CGDMR	3460	Bd1-1	Bd1	27661200	27661599	399	hypo	0	0.00337268	0.972222	0.975659	0.963557	0.00650759	0.971787	0	0	0.635514	0.719101	0.667752	0	0.586813	0.00539568	0.00470035	0.0178817	0.0106888	0.0148322	0.0018622	0.00658858
CGDMR	3464	Bd1-1	Bd1	27671200	27671399	199	hypo	0.0285714	0	1	NA	0	0	0.5	0	0	0.125	0	0.111111	0.0526316	0	0	0	0.0162602	0	0.0461538	0	0
CGDMR	3468	Bd1-1	Bd1	27705400	27705999	599	hypo	0.0102041	0.724191	0.92053	0	0.788194	0.740079	0.833333	0.0124611	0.0895197	0	0.0689655	0.0314465	0.141869	0.103286	0.0080573	0.0081761	0.002849	0.00769231	0	0.00465839	0.00732357
CGDMR	3469	Bd1-1	Bd1	27706100	27706599	499	hypo	0.0052356	0.9664	0.984064	0.0149254	0.952153	0.956436	0.968254	0.00531915	0.423695	0.271084	0	0.162544	0.404959	0.374648	0.0043592	0.002	0.017316	0	0.00953516	0.00538117	0.00484496
CGDMR	3476	Bd1-1	Bd1	27777600	27778299	699	hypo	0.0103806	0.949749	0.977215	0.959052	0.976562	0.968847	0.960366	0.0111524	0.708674	0.751918	0.730392	0.738889	0.724458	0.720971	0.00505051	0.0135074	0.00761773	0.0153524	0.0119171	0.0136134	0.00807823
CGDMR	3479	Bd1-1	Bd1	27782700	27783499	799	hypo	0.033101	0.951652	0.954622	0.950166	0.958048	0.970545	0.962011	0.0201613	0.703161	0.707055	0.201657	0.822157	0.800254	0.390766	0.0075188	0.00912454	0.0113636	0.00496032	0.0162364	0.00970655	0.0138308
CGDMR	3481	Bd1-1	Bd1	27801300	27801499	199	hypo	0.0612245	0.772727	0.911111	0.835616	0.791444	0.5	0.610169	0	0.352941	0.5	0.390244	0.390244	0.253165	0.323529	0.00884956	0.00510204	0	0.027027	0.00892857	0	0.0230415
CGDMR	3485	Bd1-1	Bd1	27844800	27845199	399	hyper	0.864686	0	0	0	0	0.0204082	0	0.0223214	0.00956938	0.0120482	0	0	0.0473684	0.00561798	0.0179894	0.00904159	0.00943396	0.0296296	0	0	0.00209644
CGDMR	3487	Bd1-1	Bd1	27874700	27874899	199	hyper	0.846154	0.157895	0	0.8	0.333333	0	0.625	0.0196078	0.027027	0	0	0	0	0.0909091	0.0195312	0.00613497	0.0129032	0	0	0	0.107143
CGDMR	3492	Bd1-1	Bd1	27882700	27883099	399	hyper	0.840426	0.056338	0	0.842105	0	0	0.25	0.0141844	0	0	0.0212766	0.0263158	0.02	0.0252101	0.00961539	0.00660793	0.0161943	0.0034965	0	0.0103896	0.00161031
CGDMR	3495	Bd1-1	Bd1	27884400	27884699	299	hyper	0.88	0.00357143	0.0833333	0.00784314	0.00233645	0.00374532	0.00321543	0.0131234	0.0268199	0.0153061	0.0159574	0.0131148	0.00833333	0.015625	0.0066313	0.00603622	0	0.0167131	0.00572519	0.00208768	0.00787402
CGDMR	3498	Bd1-1	Bd1	27887900	27888099	199	hyper	0.8375	0.0116279	0	0	0	0	0.0526316	0	0	0	0	0.0151515	0	0	0.00249377	0.00803213	0.0102041	0	0	0	0
CGDMR	3499	Bd1-1	Bd1	27888500	27888699	199	hyper	0.980392	0.102564	0	0	0.0416667	0	0.0714286	0.0434783	0	0	0	0	0	0	0.00476191	0.01875	0	0	0	0	0
CGDMR	3500	Bd1-1	Bd1	27889500	27889699	199	hyper	0.864865	0	0	0	0	0	0	0.0111111	0.00719425	0	0	0.0377358	0	0	0.00387597	0	0	0	0	0.0157895	0.00189036
CGDMR	3501	Bd1-1	Bd1	27889800	27890099	299	hyper	0.840708	0	0.0434783	0	0.1	0	0	0.030303	0	0.125	0	0.0555556	0	0	0.0142672	0.00255755	0.00847458	0	0	0	0
CGDMR	3503	Bd1-1	Bd1	27900400	27900699	299	hypo	0.0149254	0	0.985915	0	0	0	0	0.0119048	0.0416667	0.869159	0	0	0.047619	0	0.00496278	0	0.00688073	0	0.00943396	0	0
CGDMR	3508	Bd1-1	Bd1	27963100	27963299	199	hypo	0.07	0.45122	0.965035	0.960938	0.990228	0.567416	0.56654	0.0365854	0.0821429	0.314961	0.348416	0.275472	0.0640569	0.0772727	0.0497512	0.0601202	0.0166667	0	0.0169133	0.057971	0.0411622
CGDMR	3512	Bd1-1	Bd1	27990400	27991099	699	hyper	0.964149	0.00425985	0.00909091	0.0183727	0.00953679	0.00392157	0.00870406	0.830898	0.00841346	0.0246914	0.0128205	0.00498339	0.0034965	0.00829875	0.0604106	0.00950872	0.00452489	0.00537634	0	0.0222222	0
CGDMR	3517	Bd1-1	Bd1	28075600	28075899	299	hypo	0	0.96	0.988889	0.97351	0	0.972973	0.934483	0.011236	0.762069	0.775	0.803571	0	0.686869	0.789916	0	0.0420168	0.0627615	0.0636132	NA	0.0514286	0.111301
CGDMR	3526	Bd1-1	Bd1	28120500	28120799	299	hypo	0.0446809	0.330233	0.861446	0.767123	0.899038	0.729469	0.817073	0.0224215	0.00454546	0.0301205	0.00584795	0.0260417	0.0125523	0.0292135	0.00726979	0.00482315	0.00655022	0.00588235	0	0.00144928	0.0064257
CGDMR	3528	Bd1-1	Bd1	28121100	28121499	399	hypo	0.0565371	0.605863	0.889706	0.811765	0.918239	0.792271	0.826748	0.00828729	0.00493827	0.02	0.00735294	0.0273973	0.00662252	0.0408602	0.00674374	0.0051458	0	0.0075188	0.0101351	0.0108992	0.00895766
CGDMR	3532	Bd1-1	Bd1	28153400	28154099	699	hypo	0.0122888	0.977576	0.981707	0.980435	0.011236	0.975236	0.00295421	0.014966	0.692988	0.711185	0.788732	0.00925926	0.702101	0.00578035	0.02595	0.0191718	0.00972591	0.0222552	0.00772201	0.0293028	0.00925069
CGDMR	3534	Bd1-1	Bd1	28202400	28202599	199	hyper	0.957746	0.921053	0.0227273	0	1	0.931624	0.0769231	0.686275	0.734694	0	NA	0.92	0.844828	0.0454545	0.00440529	0	0.017094	0	0.00787402	0.0155642	0.0240964
CGDMR	3537	Bd1-1	Bd1	28223400	28223799	399	hypo	0.0491803	0.375839	0.870968	0	0.0314961	0.106195	0.0434783	0.0221239	0.0319149	0.0701754	0	0	0.00943396	0.0316456	0.00958904	0.0152027	0.00859599	0.0777778	0.0336842	0.0356295	0.0504673
CGDMR	3538	Bd1-1	Bd1	28228700	28228899	199	hyper	0.978417	0	0.0384615	0.0555556	0.0263158	0.03125	0.0430108	0.243902	0	0	0	0	0	0.0185185	0.0272109	0.0126582	0	0	0	0	0.00613497
CGDMR	3544	Bd1-1	Bd1	28291700	28291899	199	hypo	0.028169	0	0.909091	1	0	0.940299	0.666667	0.012987	0	0.477273	NA	0	0.526316	0	0.0125523	0.026087	0	0	0	0.0237467	0
CGDMR	3545	Bd1-1	Bd1	28297100	28297399	299	hypo	0.0105634	0.458515	0.840909	0.00877193	0.070922	0.967655	0.0116959	0.0434783	0.04	0.391304	0	0	0.52	0.05	0.0180879	0.00943396	0	0	0	0.017199	0
CGDMR	3549	Bd1-1	Bd1	28314100	28314599	499	hypo	0	0.919861	1	0	0.986755	0	0.0238095	0.00296736	0.638376	0.735075	0	0.768382	0.0273973	0.0212766	0.00418994	0.0304114	0.0352349	0	0.0249042	0.016129	0.038961
CGDMR	3552	Bd1-1	Bd1	28335400	28335599	199	hypo	0.00625	0.734967	0.972603	0.84466	0.966346	0.869919	0.754967	0.0115385	0.326648	0.411765	0.106061	0.376543	0.238532	0.264368	0.0123457	0.0103448	0.0175439	0.0714286	0.00595238	0	0.00643087
CGDMR	3554	Bd1-1	Bd1	28337500	28337799	299	hyper	0.771654	0	0	0.0378788	0.0645161	0.0142857	0	0.242081	0.00323625	0.0380952	0	0	0.0113208	0.0154639	0.0204708	0.0078125	0.01875	0.0122699	0.00347222	0.0130112	0.00519481
CGDMR	3555	Bd1-1	Bd1	28343600	28343899	299	hyper	0.963235	0.0344828	0.0210526	0	0.0240964	0.026087	0	0.741259	0	0	0.0625	0	0.0172414	0.025974	0.0138614	0	0	0	0.0150376	0.00995025	0
CGDMR	3556	Bd1-1	Bd1	28346200	28346399	199	hypo	0.138462	0	0.933333	0.0540541	0.241935	0.868852	0.0470588	0.025641	0.0384615	0.322581	0.025641	0.114754	0.136364	0.0344828	0.00552486	0	0.0277778	0.0108696	0	0	0.0157068
CGDMR	3557	Bd1-1	Bd1	28366800	28367099	299	hyper	0.957944	0.0188679	0	0	0	0.287425	0.227642	0.100629	0.0384615	0.0169492	0	0	0.00990099	0.0322581	0.0208817	0	0	0	0	0.003367	0.0113208
CGDMR	3559	Bd1-1	Bd1	28380400	28381199	799	hyper	0.95905	0.00730689	0.00416667	0.100372	0.0108865	0.0116009	0.955238	0.187311	0.00883392	0.0114286	0.107784	0.0135135	0.0108696	0.330049	0.0220653	0.00309597	0.00943396	0.00231482	0.00998004	0.00230947	0.127336
CGDMR	3561	Bd1-1	Bd1	28384000	28384199	199	hyper	0.88189	0.0333333	0	NA	0	0.015873	0	0.1	0	0.0175439	NA	0	0.00943396	0	0.0122549	0.00714286	0.0108696	NA	0.00769231	0.00621118	0.0232558
CGDMR	3571	Bd1-1	Bd1	28570300	28570699	399	hypo	0.110236	0.0619469	0.987097	0.04	0	0.962848	0.0217391	0.154567	0.0982143	0.730627	0	0	0.598387	0	0.0161871	0.00710059	0.00508475	0	0.0117647	0.00780572	0.0170648
CGDMR	3573	Bd1-1	Bd1	28601300	28601599	299	hypo	0.0377358	0.943662	1	0.15	0.954545	0.964706	0.883721	0	0.58	0.5	0	0.454545	0.531646	0.68	0.0133929	0.002849	0.0160643	0.0338983	0.0128205	0.00465116	0.0414201
CGDMR	3576	Bd1-1	Bd1	28628000	28628199	199	hypo	0	0.515152	0.875	0	0	0.714286	1	0	0.157895	0.8	0	0.1	0.333333	0	0	0.00520833	0.267606	0	0	0	0
CGDMR	3580	Bd1-1	Bd1	28655500	28655699	199	hypo	0.123967	0	0.90566	0	0	0.0338983	0.00840336	0	0.015625	0.152542	0	0.047619	0	0.00694444	0.0177665	0	0	0	0	0.0181818	0
CGDMR	3582	Bd1-1	Bd1	28656800	28656999	199	hypo	0.00833333	0.0340909	0.929825	0	0.111111	0.176471	0.00917431	0	0.0120482	0.411765	0	0.0166667	0.0833333	0.0123457	0.00410678	0.00862069	0	0.0208333	0.00478469	0.0123457	0.018617
CGDMR	3583	Bd1-1	Bd1	28657100	28657299	199	hypo	0	0	0.987013	0.694444	0.763359	0.90566	0	0	0	0.821429	0.333333	0.277108	0.6	0	0.0130719	0	0	0	0	0.00609756	0.0285714
CGDMR	3587	Bd1-1	Bd1	28669600	28669799	199	hypo	0	0	0.819672	0	0	0.0555556	0	0.0118343	0.0135135	0.356164	0.0769231	0	0	0	0.0113122	0.0140187	0.00842697	0.0238095	0	0.00611621	0.0184049
CGDMR	3590	Bd1-1	Bd1	28680400	28680799	399	hypo	0	0.016129	0.897059	0	0.0853659	0.808219	0	0.0117647	0	0.214286	0	0.00793651	0.176991	0.00869565	0.00576369	0.00726744	0.0347826	0	0.00411523	0.0532468	0.00591716
CGDMR	3593	Bd1-1	Bd1	28694300	28694499	199	hyper	1	0	0	0	0	0	0.075	0.725664	0	0	0	0	0.0416667	0.0192308	0.0105105	0.0131148	0.00584795	0.0222222	0.00598802	0	0
CGDMR	3596	Bd1-1	Bd1	28710800	28711299	499	hyper	0.950044	0.0110497	0	0.002849	0.00823045	0.0123288	0.00726744	0.534444	0.0042735	0.0205479	0.0116732	0.0165485	0.0145833	0.00527241	0.0114566	0.00186567	0.00686499	0.0139276	0.00231482	0.0040404	0.00282486
CGDMR	3599	Bd1-1	Bd1	28759500	28759699	199	hypo	0.0645161	0.25	0.857143	NA	0	0.0980392	0.0925926	0.133333	0	0.391304	NA	0	0	0.0588235	0.0454545	0.0493827	0.218391	NA	0	0.0208333	0.0289855
CGDMR	3606	Bd1-1	Bd1	28817700	28818099	399	hyper	0.852995	0.691373	0.00930233	0.862687	0.821918	0.724933	0.748013	0.400335	0.430584	0	0.494624	0.425926	0.416813	0.288961	0.0150801	0.0568562	0.00335571	0.0194004	0.0403458	0.0321911	0.0240334
CGDMR	3610	Bd1-1	Bd1	28853300	28853999	699	hyper	0.937233	0.0079858	0.00626305	0.00843882	0.010929	0.95481	0.00902062	0.517293	0.00652528	0.00766283	0.025	0.012987	0.610193	0.00480192	0.00954654	0.00278552	0.00204918	0	0.0046083	0.0116086	0.00850229
CGDMR	3616	Bd1-1	Bd1	28894500	28894799	299	hypo	0.00735294	0	0.877551	0	0.468085	0.0222222	0.0546875	0.00819672	0.00704225	0.0138889	0	0	0.0119048	0.00531915	0.00271248	0.00471698	0.00381679	0.0174419	0	0.00271003	0.00724638
CGDMR	3622	Bd1-1	Bd1	28967600	28968599	999	hyper	0.972002	0.866341	0.0087146	0.109827	0.84645	0.0803506	0.00817096	0.718108	0.624923	0.00775194	0.166348	0.734101	0.0542823	0.00993378	0.0450658	0.034678	0.00221239	0.00573888	0.0177891	0.000840336	0.00316205
CGDMR	3626	Bd1-1	Bd1	28971400	28971599	199	hyper	0.974684	0	0	0	0.925	0	0.0714286	0.0135135	0.0104167	0	0	0.056338	0	0.0212766	0.00329489	0.00269542	0.0126582	0.0104167	0	0	0.0046083
CGDMR	3629	Bd1-1	Bd1	28979300	28979499	199	hyper	0.972603	0.913043	0	0	0.946809	0	0	0.703704	0.666667	0	0	0.642857	0	0	0.0275591	0.0372093	0.0121951	0	0.0144928	0	0
CGDMR	3632	Bd1-1	Bd1	28981900	28982099	199	hyper	0.925926	0	0	0	0.142857	0	0	0.0120482	0.0227273	0	0	0.0666667	0	0	0	0	0.008	0	0.0289855	0.0172414	0
CGDMR	3633	Bd1-1	Bd1	28982200	28982399	199	hyper	0.927536	0	0.0555556	0	1	0	0.530612	0.0215054	0	0	0	0	0	0.030303	0.0183486	0	0.00641026	0	0	0	0.0140845
CGDMR	3634	Bd1-1	Bd1	28983200	28983399	199	hyper	0.836364	0	0	0	0.727273	0.0526316	0.588235	0	0	0	0	0	0	0	0.00240385	0.00348432	0	0	0.0306122	0.00546448	0.0142857
CGDMR	3635	Bd1-1	Bd1	28984100	28984299	199	hyper	0.916667	0	0	0	1	0	0	0.0114943	0	0	0	0	0	0	0	0	0	0	0	0	0
CGDMR	3636	Bd1-1	Bd1	28984500	28984699	199	hyper	0.877193	0	0	0	0.75	0	0	0.0102041	0	0	0	0	0	0	0.010929	0	0	0.0769231	0	0.0333333	0
CGDMR	3637	Bd1-1	Bd1	28989700	28990599	899	hypo	0.0231164	0.92552	0.973684	0.854331	0.951482	0.916887	0.948142	0.0182692	0.0290828	0.148368	0.174935	0.152338	0.184906	0.135836	0.0139294	0.00898973	0.00905701	0.0308191	0.0117271	0.0125996	0.00884956
CGDMR	3638	Bd1-1	Bd1	29000700	29000899	199	hypo	0.0119048	0.678947	0.923077	0.854839	0.666667	0.852941	0.875	0.0378151	0.0220588	0	0.0352941	0.00425532	0.0268456	0.0220994	0.0352941	0.00498753	0.0136986	0.0632911	0	0.008	0.014218
CGDMR	3643	Bd1-1	Bd1	29039300	29039499	199	hypo	0	0	0.952381	0.0306122	0.987805	0.3125	0.029703	0	0	0	0	0.00735294	0.0126582	0	0.00448431	0.00809717	0.00787402	0	0	0.00588235	0.016129
CGDMR	3647	Bd1-1	Bd1	29096700	29096899	199	hypo	0.0238095	0.973684	1	1	0.92	0.931034	0.975	0.0208333	0.391753	0.697917	0.632653	0.892308	0.09375	0.606742	0.0132743	0.0151188	0.00584795	0.0180505	0.0171233	0.00552486	0.0221328
CGDMR	3648	Bd1-1	Bd1	29104000	29104199	199	hypo	0.0649718	0.00373134	0.974359	0	0.00689655	0.00554017	0.957895	0.0191083	0.0106007	0.715909	0.0357143	0.0220588	0.010101	0.520833	0.0137457	0.010274	0.0206897	0.00675676	0	0.00250627	0.022409
CGDMR	3654	Bd1-1	Bd1	29159200	29159599	399	hypo	0.0122699	0	0.968992	0.978261	0	0.969388	0.966833	0.0295858	0.00653595	0.675325	0.627119	0	0.6	0.635452	0.00289855	0	0.0100251	0.0265487	0	0.00834202	0.0107034
CGDMR	3656	Bd1-1	Bd1	29184700	29184899	199	hyper	0.90625	0.37037	0.08	0.138889	0.0909091	0.5	0.810811	0.0131579	0	0.0454545	0.0454545	0.125	0	0.0131579	0.010989	0	0.00840336	0	0.030303	0	0.0167598
CGDMR	3660	Bd1-1	Bd1	29244300	29244699	399	hypo	0.0346821	0.919831	0.978417	0.076087	0.9488	0.0769231	0.116505	0.0357143	0.879845	0.895954	0.0127389	0.842989	0.0115607	0.011236	0.00509338	0.028757	0.0223267	0.0116279	0.011242	0	0.00645161
CGDMR	3666	Bd1-1	Bd1	29352300	29352499	199	hyper	0.810127	0	0	0.461538	0	0.928571	1	0.01	0.111111	0	0	0	0	0	0.00772201	0.0392157	0	0.0555556	0	0.0131579	0
CGDMR	3668	Bd1-1	Bd1	29356000	29356199	199	hyper	0.902439	0.928571	0	1	1	1	1	0	0	0	0	0	NA	0	0.0144928	0	0	0	0	0	0
CGDMR	3677	Bd1-1	Bd1	29477300	29477499	199	hypo	0.0853659	0.946429	1	0.448276	0	0.27957	0.966942	0	0.106383	0.230769	0	0.0434783	0	0.1125	0.0135135	0	0.00819672	0	0.00694444	0	0
CGDMR	3688	Bd1-1	Bd1	29638700	29638999	299	hypo	0	0	0.901099	0	0	0	0	0.029661	0.0101523	0.6	0	0	0	0.008	0.00787402	0.0102669	0.127764	0	0.0136054	0.00448431	0.00287356
CGDMR	3696	Bd1-1	Bd1	29707100	29707299	199	hypo	0.0379747	0.0222222	1	0.857143	0	0.918367	0.916667	0.0434783	0.0377358	0.677419	0.578947	0	0.73913	0.766234	0.0141844	0.0180723	0.0196078	0	0	0.0213904	0.0263158
CGDMR	3697	Bd1-1	Bd1	29711500	29712099	599	hypo	0.00409836	0.963197	0.981211	0.00440529	0.943213	0	0.00585938	0.00502513	0.734597	0.749361	0.0201005	0.748	0.0187266	0.0221607	0.00777454	0.00845467	0.0108992	0.0117647	0.00907716	0.00167224	0.00133869
CGDMR	3699	Bd1-1	Bd1	29755300	29755499	199	hypo	0.0102041	0	1	0.984848	0.945205	0.983333	0.927602	0.0306122	0	0.45098	0.728814	0.625	0.502924	0.393665	0.004	0.00613497	0.0104167	0.015748	0.0220588	0.0104439	0.014862
CGDMR	3700	Bd1-1	Bd1	29766100	29766299	199	hypo	0.197531	0.931507	1	1	0.968254	0.907895	0.941176	0.0129032	0.00729927	0.0253165	0.034188	0.0318471	0.0331126	0.015873	0.0126582	0	0	0.00769231	0.00943396	0	0.0204082
CGDMR	3702	Bd1-1	Bd1	29773400	29773799	399	hypo	0.0179283	0.0206897	0.936073	NA	0.928709	NA	1	0.015625	0.0352941	0.441667	NA	0.636646	NA	1	0.0163522	0.0100503	0.00337838	NA	0.0112994	NA	0
CGDMR	3703	Bd1-1	Bd1	29779800	29779999	199	hyper	0.995	0.0224719	0	0	0	0.0322581	0	0.716981	0.0222222	0	0	0	0.133333	0	0	0.0120482	0.015873	0	0	0	0.0555556
CGDMR	3705	Bd1-1	Bd1	29798700	29798899	199	hyper	0.767157	0.667647	0	0.0212766	0.723192	0.107914	0.00537634	0.225941	0.282297	0	0	0.381323	0.0144928	0	0.043379	0.0501567	0.0571429	0	0.101399	0	0.00869565
CGDMR	3707	Bd1-1	Bd1	29841500	29842099	599	hypo	0.0679245	0.112224	0.974596	0.191083	0.898551	0.946475	0.928763	0.0273438	0.0461538	0.731707	0.132075	0.333333	0.621908	0.395683	0.012436	0.0144665	0.0144404	0.00353357	0.00445236	0.0124395	0.00740741
CGDMR	3711	Bd1-1	Bd1	29898600	29899099	499	hypo	0	0.982206	0.982759	0.987013	0.977099	0.571429	0.134615	0.002849	0.82973	0.392265	0.233333	0.0384615	0.0238095	0.012945	0.00142653	0.0121212	0.00462963	0.00408163	0.00722022	0.00974026	0.00567108
CGDMR	3716	Bd1-1	Bd1	29931300	29932499	1199	hypo	0.0159011	0.848537	0.96966	0.020202	0.0144404	0.0165631	0.0110497	0.011194	0.566845	0.732903	0.00282486	0.00992064	0.013986	0.00473934	0.00502318	0.00641026	0.0162767	0.00658979	0.005923	0.0034642	0.0046875
CGDMR	3720	Bd1-1	Bd1	29960900	29961099	199	hyper	0.949367	0.108108	0	0	0.0416667	0.0175439	0.923077	0.0555556	0	0.0151515	0.0204082	0	0	0.0131579	0.0125786	0.00900901	0.00512821	0.0232558	0.021978	0	0.0101523
CGDMR	3722	Bd1-1	Bd1	29961400	29961599	199	hyper	0.938462	0	0.130435	0.0588235	0.142857	0	0.55	0	0	0	0	0	0	0	0.0030581	0.0100671	0.0133333	0	0.0114943	0	0.0238095
CGDMR	3723	Bd1-1	Bd1	29964400	29964599	199	hypo	0.0147059	0.943182	0.933333	0.995951	0.404959	0	0	0.005291	0.716636	0.666667	0.65529	0.497368	0.0357143	0	0.00992556	0.00949598	0.0191693	0.00578871	0.00312175	0.00446429	0.0060241
CGDMR	3726	Bd1-1	Bd1	29977800	29978099	299	hypo	0.0175439	0	0.956044	0	0.986667	0	0	0.0261438	0.0178571	0.810219	0	0.911917	0	0.00925926	0.00248756	0.00757576	0.00646552	0.027027	0.0204429	0	0.00561798
CGDMR	3736	Bd1-1	Bd1	30106800	30107199	399	hyper	0.965432	0.0681431	0.0538117	0.666667	0.0178817	0.454545	0.8	0.583333	0.04	0.0581395	1	0.00769231	0.5	1	0.00350877	0.00992556	0	0	0.0202532	0	0
CGDMR	3737	Bd1-1	Bd1	30107300	30107499	199	hyper	0.964218	0.00221239	0.00406504	NA	0.017284	0	NA	0.609113	0	0	NA	0.00706714	0	NA	0.00856164	0.00963855	0	NA	0.00668896	0	NA
CGDMR	3742	Bd1-1	Bd1	30139500	30139899	399	hypo	0.0131148	0.017316	0.978799	0	0	0.0172414	0.0111524	0.00740741	0.0102564	0.712766	0.012987	0	0	0.0205128	0	0.00693241	0.00473934	0.0140845	0.0124224	0.013468	0.00526316
CGDMR	3745	Bd1-1	Bd1	30164900	30165099	199	hypo	0.0540541	0.954545	1	0.5	NA	NA	0.666667	0.125	0	0.333333	0	NA	NA	0.333333	0	0.0153846	0	0	NA	NA	0
CGDMR	3747	Bd1-1	Bd1	30191400	30191999	599	hyper	0.915294	0.90404	0.0208333	0	0	0	0	0.732811	0.756708	0.0205479	0.00840336	0	0.00735294	0	0.0512712	0.0639476	0.0109489	0.00395257	0.00829875	0	0.00707547
CGDMR	3753	Bd1-1	Bd1	30271500	30272299	799	hypo	0.00863724	0.964451	0.970332	0.966908	0.979522	0.973861	0.0235571	0.0123119	0.624738	0.467949	0.312804	0.539809	0.417532	0.00578035	0.0123278	0.00729927	0.00924856	0.0161616	0.00434783	0.0122449	0.0111421
CGDMR	3754	Bd1-1	Bd1	30288600	30288799	199	hypo	0	0.637681	0.869565	0.413793	0	0	0	0.0108696	0.00403226	0	0	0	0	0.00643087	0.00487805	0.00374532	0	0	0	0.0028169	0.00700525
CGDMR	3755	Bd1-1	Bd1	30297200	30297699	499	hyper	0.909091	0.025641	0	0.142857	0.0625	0.0108108	0.0106007	0.0110759	0.0127877	0.00851064	0.0166667	0	0.0193906	0.0126812	0.00562193	0.00662252	0.0120482	0.00636943	0.0133333	0.00204499	0.00134409
CGDMR	3756	Bd1-1	Bd1	30298100	30298299	199	hyper	0.923977	0	0.016129	0	0	0	0	0.0277008	0	0.0152672	0	0.0104167	0.0338983	0.0166667	0.00555556	0	0.011583	0.0144928	0.0106383	0.00938967	0.00475059
CGDMR	3761	Bd1-1	Bd1	30304700	30304999	299	hypo	0.0392157	0.864407	0.895522	0.911765	0.971154	0.852459	0.89172	0.045977	0.419355	0.417722	0.395833	0.321429	0.33	0.295455	0.0692308	0.0365297	0.0219298	0.0733333	0	0.0605096	0.0574324
CGDMR	3767	Bd1-1	Bd1	30366000	30366299	299	hypo	0.0240964	0.0246914	0.954545	0	0	0	0.0222222	0	0	0.5	0	0	0	0.0169492	0	0	0	0.03125	0	0	0.0158103
CGDMR	3771	Bd1-1	Bd1	30401300	30401699	399	hyper	0.949833	0.103321	0.135906	0.216646	0.0916399	0.179936	0.203352	0.189802	0.0347349	0.0175	0.038055	0.0188235	0.0227848	0.0292398	0.012939	0.028394	0.027027	0.0487106	0.0338573	0.0248521	0.0297463
CGDMR	3777	Bd1-1	Bd1	30471700	30472699	999	hyper	0.95766	0.953355	0.00943396	0.00773196	0.00712378	0.0369254	0.0051053	0.761905	0.730101	0.0243902	0.00502513	0.0131752	0.024	0.00694444	0.0226058	0.0258925	0.0169753	0.00913838	0.0139018	0.00835655	0.00384827
CGDMR	3778	Bd1-1	Bd1	30476500	30477299	799	hypo	0.010453	0.937307	0.984081	0.983297	0.948344	0.971174	0.961835	0.0140845	0.682723	0.733051	0.792906	0.546099	0.762561	0.779538	0.00243309	0.0115713	0.0506224	0.0395928	0.0283353	0.047524	0.213014
CGDMR	3781	Bd1-1	Bd1	30515500	30515799	299	hypo	0.012987	0	0.935185	0	0.0384615	0.882353	0.0606061	0	0	0.241379	0	0	0.206897	0	0.00369004	0.0136986	0.0204082	0	0	0.00900901	0
CGDMR	3787	Bd1-1	Bd1	30584500	30585099	599	hyper	0.969267	0	0	0.965035	0.0447761	0.969231	0.00829875	0.543307	0.114286	0.0487805	0.420455	0.0166667	0.686275	0.0839695	0.014268	0.0130719	0.00537634	0.0196592	0	0.0176565	0.0100111
CGDMR	3788	Bd1-1	Bd1	30589500	30589699	199	hypo	0	0.921569	1	0.852941	0.155556	0	0.04	0.0205479	0.133929	0.336364	0.503401	0.00970874	0	0	0.0078125	0.0155039	0.00511509	0.00684931	0	0	0.00662252
CGDMR	3789	Bd1-1	Bd1	30589800	30589999	199	hypo	0	0.285714	0.933333	NA	0	0	0	0	0.166667	0	NA	0	0.027027	0	0	0.0136986	0	NA	0.0060241	0.00615385	0.0217391
CGDMR	3793	Bd1-1	Bd1	30623200	30623399	199	hypo	0.176471	0.387097	0.929825	0.897059	0.364706	0.861386	0.0131579	0.105263	0.0526316	0.444444	0.352941	0.2	0.228571	0.0487805	0.121547	0.285714	0.0769231	0.102564	0.171642	0.175325	0.15
CGDMR	3802	Bd1-1	Bd1	30740100	30740299	199	hypo	0.031746	0.25	0.933333	0	0	0.277778	0.375	0.00714286	0	0.0909091	0	0	0.0263158	0.179487	0	0	0.181818	0	0	0	0
CGDMR	3807	Bd1-1	Bd1	30785300	30786399	1099	hypo	0.109322	0.941176	0.985423	0.854167	0.966387	0.972509	0.95592	0.00410846	0.506734	0.575385	0.836364	0.545272	0.626506	0.557034	0.00366876	0.0172279	0.0445151	0	0.012951	0.0235849	0.0295827
CGDMR	3808	Bd1-1	Bd1	30788100	30788299	199	hyper	0.862717	0.0148148	0	0	0	0	0.00628931	0.324094	0.00909091	0.0689655	0.0454545	0	0.0350877	0	0.0715962	0.00448431	0	0	0	0	0.015
CGDMR	3809	Bd1-1	Bd1	30803100	30803499	399	hypo	0.0104712	0.979021	0.971751	0	0.975694	0.988417	0.971182	0	0.829082	0.864253	0	0.84	0.778313	0.809069	0.0127119	0.00994201	0.0114796	0	0.00786026	0.0107973	0.00864553
CGDMR	3814	Bd1-1	Bd1	30834000	30834199	199	hypo	0.136986	0	0.955556	0.666667	0	0.84	0.272727	0.0294118	0	0.444444	0	0	0.172414	0.133333	0.00754717	0	0.0430108	0	0	0.0103093	0
CGDMR	3815	Bd1-1	Bd1	30834300	30834499	199	hypo	0	0	0.976744	0	0	0.810811	0.0123457	0.0138889	0	0.785714	0	0	0.288136	0.0285714	0.0168067	0	0.0114943	0	0	0.015873	0.010101
CGDMR	3819	Bd1-1	Bd1	30925100	30925399	299	hypo	0	0.027027	0.910448	0.00862069	0.0104167	0.970149	0	0.0288462	0.0224719	0.0740741	0	0	0	0.0111111	0	0.020202	0.00934579	0	0	0.0230769	0
CGDMR	3825	Bd1-1	Bd1	30974700	30974899	199	hyper	0.874113	0.270642	0	0.0212766	0.0123839	0.525994	0	0.032967	0.0117647	0	0	0	0.0276243	0.00970874	0	0.0192308	0	0	0.00416667	0	0
CGDMR	3830	Bd1-1	Bd1	31008600	31008899	299	hypo	0.0484848	0.965217	0.978723	0	1	0.971014	0.985075	0	0.820513	0.55	0	0.806452	0.691176	0.826923	0.00604839	0.012987	0.0114943	0	0.0172414	0.0223464	0.0143678
CGDMR	3840	Bd1-1	Bd1	31189300	31190099	799	hypo	0.00248139	0.0357143	0.978355	0.0227273	0	0.015625	0	0.0205656	0.0125	0.371429	0	0.00826446	0.0114943	0.00401606	0.000911577	0.00561798	0.00521376	0.0157895	0	0	0.00661157
CGDMR	3841	Bd1-1	Bd1	31190300	31190499	199	hypo	0	0	0.875	NA	NA	NA	0	0	0	0.166667	NA	NA	NA	0	0.0116279	0	0.0377358	NA	0	NA	0
CGDMR	3844	Bd1-1	Bd1	31200500	31200699	199	hypo	0.0235294	0.797872	1	0	0	0.472727	0.037037	0.0392157	0.654412	0.645833	0.0178571	0.038961	0.165049	0.0373832	0.0403226	0.0157233	0.112971	0	0	0.00819672	0.00653595
CGDMR	3846	Bd1-1	Bd1	31223000	31223399	399	hyper	0.879032	0.926065	0.0145631	0	0.939732	0.0209974	0.00468384	0.218605	0.412214	0	0	0.561321	0.0171429	0.0046083	0.0176367	0.00643777	0.0161943	0.0116279	0.011811	0	0.0125628
CGDMR	3850	Bd1-1	Bd1	31282400	31282699	299	hypo	0.0561798	0.830189	0.96	0	0.820896	0.786667	0.945833	0	0.425532	0.55814	0	0.652174	0.21875	0.659341	0.011236	0.0169492	0.083871	0.0169492	0.0869565	0.115385	0.00753769
CGDMR	3853	Bd1-1	Bd1	31333700	31333899	199	hypo	0	0	1	0.830508	0.0769231	0.666667	0.938462	0	0	0.416667	0.349206	0	0.5	0.342857	0	0	0	0	0	0.0333333	0.00518135
CGDMR	3854	Bd1-1	Bd1	31345000	31345199	199	hypo	0.155556	0.972603	0.953488	0.275862	0.988636	0.938462	0.933333	0	0.926829	0.903226	0.181818	0.965517	0.962963	0.725806	0.00452489	0.0180879	0.0251799	0.00793651	0.0417495	0.0214724	0.0149007
CGDMR	3861	Bd1-1	Bd1	31405800	31405999	199	hypo	0.0588235	1	1	1	1	1	1	0	0.923077	0.75	0.5	0.846154	0.222222	0	0	0	0	0	0.0175439	0	0
CGDMR	3864	Bd1-1	Bd1	31431400	31431599	199	hyper	0.970414	0.470588	0.0714286	0.921053	0	0.967742	0.0909091	0.666667	0.037037	0	0.65	0	0.6	0.0666667	0.0215054	0	0	0.00408163	0	0.0268199	0
CGDMR	3866	Bd1-1	Bd1	31434700	31434999	299	hypo	0.0333333	0.988889	0.97619	0.913043	0	0.977778	0.974576	0.0882353	0.686275	0.884615	0	0.416667	0.305556	0.772152	0	0.0026455	0.0287081	0	0.01	0.0285714	0.0132576
CGDMR	3867	Bd1-1	Bd1	31438200	31438399	199	hyper	0.968085	0.920635	0	0	0.0689655	0.925	0.979798	0.451613	0.638298	0	0	0.151515	0.638889	0.154545	0.010453	0.0102564	0	0.166667	0	0.128205	0.0553746
CGDMR	3873	Bd1-1	Bd1	31561200	31561399	199	hyper	0.829545	0.712963	0.0555556	0.769231	0.666667	0.0267857	0	0.00934579	0	0	0	0	0.037037	0	0.0085034	0.00806452	0.0149254	0	0	0.0138249	0.0193798
CGDMR	3880	Bd1-1	Bd1	31628100	31628299	199	hyper	0.84	0	0	0.807692	NA	0	0	0	0.0208333	0	0	NA	0.0666667	0	0.010101	0.00392157	0	0	NA	0	0
CGDMR	3881	Bd1-1	Bd1	31637700	31637999	299	hypo	0.0487805	1	0.974359	1	0.938462	0.948718	0.971963	0	0.654545	0.809524	0.941176	0.84375	0.8125	0.785714	0.00527705	0.0213415	0.00980392	0.0185185	0.0275689	0.0294118	0.0100604
CGDMR	3882	Bd1-1	Bd1	31638100	31638299	199	hypo	0.0561798	0.972973	0.982906	0.960784	0.98895	0.981395	0.985981	0	0.727273	0.829268	0.916667	0.848739	0.870968	0.830986	0.0141509	0.025	0.00704225	0.0112994	0.00271003	0.0193133	0.0104384
CGDMR	3883	Bd1-1	Bd1	31640000	31640299	299	hyper	0.94186	0.0107817	0.0169492	0	0.0597826	0.0261438	0.00928793	0.254717	0.00364964	0.0408163	0	0	0.0172414	0.0241546	0.00735294	0	0.0113636	0	0	0	0
CGDMR	3887	Bd1-1	Bd1	31645500	31645699	199	hypo	0.0909091	0.3	0.918919	NA	0.666667	0.673913	0.369128	0	0.104478	0.5	NA	0.272727	0.15	0.192308	0	0	0.0285714	NA	0	0.0769231	0.00613497
CGDMR	3892	Bd1-1	Bd1	31790700	31790899	199	hypo	0	0.909091	0.854167	0.851852	0.926471	1	0.958042	0.0892857	0.552846	0.626866	0.5625	0.806122	0.363636	0.359551	0	0.00176678	0.00701754	0.0149254	0.0121359	0.0263158	0.0157959
CGDMR	3894	Bd1-1	Bd1	31817900	31818399	499	hyper	0.948409	0.0121507	0.0159151	0.0168776	0.00664452	0.969231	0.00499168	0.606742	0.014733	0.00359712	0.041958	0.00542005	0.696567	0.0130548	0.00544662	0.00596252	0.00519931	0	0.00276625	0.0137552	0.0071736
CGDMR	3897	Bd1-1	Bd1	31826900	31827799	899	hypo	0.0403226	0.964793	0.981455	0.0234742	0.930851	0.00641026	0.967412	0.0549451	0.672346	0.745902	0.0129199	0.76988	0.022113	0.76259	0.0595065	0.0207469	0.00808081	0.00425532	0.0100719	0.00778816	0.0231454
CGDMR	3901	Bd1-1	Bd1	31908600	31908799	199	hypo	0	0.454545	0.857143	0.4	0	0	0.95122	0	0.0666667	0.25	0	0	NA	0.047619	0	0	0	0.0666667	0	0	0
CGDMR	3906	Bd1-1	Bd1	31941200	31941399	199	hypo	0	0.843373	0.954545	0	0.0833333	0	0.0357143	0.0105263	0	0.0273973	0	0	0	0	0.0114286	0.0191489	0	0	0.010929	0	0.0410256
CGDMR	3919	Bd1-1	Bd1	32059500	32059699	199	hypo	0.0238095	0.0491803	0.878788	0.125	0	1	0.037037	0	0	0.125	0	0	0.75	0.0357143	0.00574713	0.0147783	0	0.0555556	0	0.0138889	0
CGDMR	3922	Bd1-1	Bd1	32138000	32138199	199	hypo	0.0909091	0.75	0.923077	1	0.75	1	0.764706	0	0.285714	0.5	0.666667	0.571429	0.181818	0.714286	0	0	0.0119048	0	0	0.159091	0
CGDMR	3924	Bd1-1	Bd1	32163600	32163799	199	hypo	0.166667	1	0.933333	1	0.926829	0.833333	0.933333	0	0.712121	0.176471	0	0.09375	0.473684	0.717391	0	0	0.02	0	0	0.0340909	0
CGDMR	3927	Bd1-1	Bd1	32181600	32181899	299	hyper	0.978947	0.97037	0	1	0.950276	0.956284	0.217391	0.820339	0.831761	0	0.919048	0.898734	0.791749	0.035461	0.0118679	0.0178094	0.0138504	0.0201005	0.0222686	0.0160395	0.012987
CGDMR	3928	Bd1-1	Bd1	32182000	32182199	199	hyper	0.980226	0.898305	0	0.909524	0.737838	0.917355	0.00784314	0.478992	0.503356	0	0.87	0.824561	0.84058	0	0.189831	0.0568862	0.0273973	0	0	0.016129	0
CGDMR	3936	Bd1-1	Bd1	32252400	32252599	199	hyper	0.833693	0.559451	0.0287356	0.364583	0.794408	0.00251256	0.882743	0.0355872	0.00273224	0.0425532	0.0133333	0.0165563	0	0.0212766	0.00728408	0.00434468	0	0.00388349	0.00184162	0.00314961	0.0114943
CGDMR	3938	Bd1-1	Bd1	32258600	32258999	399	hyper	0.894118	0.0352941	0.01	0.0300752	0.014218	0.00833333	0	0.20438	0.0175439	0	0	0	0.00666667	0	0.0114464	0.0131086	0.013245	0.00934579	0.00518135	0.00386847	0.00182482
CGDMR	3942	Bd1-1	Bd1	32275700	32275899	199	hypo	0.134021	0.162791	1	0.925926	0.945055	0.060241	0.056338	0.0803571	0.233333	0.79661	0.533333	0.853535	0.232	0.0204082	0.0172414	0	0	0	0.00462963	0.0348432	0.00772201
CGDMR	3944	Bd1-1	Bd1	32280400	32280699	299	hypo	0.113514	0.205882	0.962025	0.948718	0.924107	0.137681	0.189474	0.0106007	0.00564972	0.0364963	0	0.0340909	0.0106383	0.00925926	0.00758534	0.00978793	0	0	0.0075643	0.00696864	0
CGDMR	3945	Bd1-1	Bd1	32285500	32285799	299	hypo	0.0125	0.788462	0.945455	0.025	0.0833333	0.470588	0.909091	0.0232558	0.5	0.62069	0	0	0.0555556	0.653061	0.00810811	0.0125313	0.003663	0.027027	0	0.0168067	0.00863558
CGDMR	3957	Bd1-1	Bd1	32442000	32442499	499	hyper	0.93586	0.888693	0.0775862	0.899281	0.817647	0.92665	0.289673	0.621795	0.521001	0.0275591	0.574751	0.423729	0.568287	0.270751	0.0231023	0.0329997	0.0223776	0.022805	0.0575658	0.0304587	0.071875
CGDMR	3959	Bd1-1	Bd1	32481600	32482499	899	hypo	0.022508	0.953522	0.979528	0.956613	0.974925	0.956897	0.95322	0.0258621	0.546655	0.540687	0.707584	0.546188	0.344136	0.452196	0.014273	0.00620292	0.0102652	0.0191205	0.0142631	0.0195783	0.0168429
CGDMR	3961	Bd1-1	Bd1	32506200	32506699	499	hypo	0.00391389	0.956897	0.971084	0.0320856	0.949531	0.927731	0.0213675	0.0218341	0.456026	0.479798	0	0.498765	0.405204	0.00840336	0.0130841	0.0444698	0.019943	0.0103093	0.0319574	0.00874636	0.00355872
CGDMR	3962	Bd1-1	Bd1	32506800	32507099	299	hypo	0.131579	0.945946	1	0.04	1	0.948718	0.153846	0.0526316	0.728571	0.803279	0.0588235	0.686275	0.61086	0.0851064	0.0384615	0.0390805	0.0827068	0.0438596	0.0253165	0.0483461	0.0740741
CGDMR	3963	Bd1-1	Bd1	32517700	32517899	199	hypo	0.0136986	0	0.9	0	0	0	0.354839	0.142857	0	0	0	0.333333	0	0.0689655	0.0162866	0.015625	0	0.0588235	0	0	0.00793651
CGDMR	3969	Bd1-1	Bd1	32555600	32556099	499	hyper	0.932584	0.963636	0.00877193	0.914894	0.960784	0.968326	0.905263	0.555556	0.691318	0.166667	0.763636	0.736264	0.637037	0.586957	0.0236337	0.0132518	0.0573395	0.0515464	0.0342466	0.0119617	0.0144766
CGDMR	3970	Bd1-1	Bd1	32557200	32557499	299	hypo	0.0333333	0.951613	0.981481	0.186441	0	0	0.539062	0.062069	0.848889	0.807407	0.803213	0.0655738	0.0879121	0.765333	0	0.0212766	0.0289017	0.0182232	0	0.0326087	0.0106242
CGDMR	3973	Bd1-1	Bd1	32582900	32583099	199	hyper	0.95671	0.847458	0	0.982249	0	0.0178571	0.811966	0.866142	0.414634	0	0.848485	0	0.0322581	0.120482	0.0230061	0.0052356	0	0.0262626	0.0150754	0	0.0168067
CGDMR	3976	Bd1-1	Bd1	32598500	32598699	199	hypo	0	1	1	NA	0.913043	1	0	0.03125	0.636364	0.68	NA	0.571429	0.875	0	0	0.00331126	0.00729927	NA	0.0102564	0	0
CGDMR	3985	Bd1-1	Bd1	32714700	32715099	399	hyper	0.961397	0.00436681	0.0173913	0.954955	0	0.0142857	0.0149254	0.577778	0	0.00943396	0.663462	0.0357143	0.0441176	0	0.0341637	0.00607903	0	0.0494792	0.00311526	0	0.00220751
CGDMR	3992	Bd1-1	Bd1	32775400	32775599	199	hypo	0	0	1	1	0.411765	0.978723	0.684211	0	0	0.363636	0.25	0	0.846154	0.3125	0.0384615	0	0	0	0.0106383	0.00881057	0.00653595
CGDMR	3993	Bd1-1	Bd1	32780100	32780399	299	hypo	0.0285714	0.977376	0.965517	0	0.994652	0.97037	0.020202	0.0124481	0.687135	0.731801	0.0147059	0.760135	0.593886	0.00666667	0.00298507	0.00561798	0.00215054	0.012987	0.0171674	0.00672948	0
CGDMR	3995	Bd1-1	Bd1	32790700	32790899	199	hypo	0	0.973568	0.980769	0.909091	0.948905	0.961089	0.92126	0	0.484472	0.623529	0.125	0.521739	0.456989	0.557895	0	0.00662252	0.0192308	0	0.0120482	0.0404624	0.047619
CGDMR	3999	Bd1-1	Bd1	32866300	32867099	799	hypo	0.0152964	0.91155	0.977083	0.0117647	0.0932203	0.0173913	0	0.00666667	0.659832	0.767677	0	0	0	0.00952381	0.0076442	0.00656566	0.0119718	0	0.00764818	0	0.00353357
CGDMR	4001	Bd1-1	Bd1	32871200	32871699	499	hypo	0.0283019	0.938856	0.975207	0.92437	0.951311	0.933333	0.92559	0	0.455357	0.646302	0.779793	0.33913	0.582492	0.57234	0.00983607	0.00539568	0.0387779	0.00851581	0.00457143	0.0103359	0.00385803
CGDMR	4002	Bd1-1	Bd1	32874900	32875599	699	hyper	0.95073	0.00798935	0.0179641	0.940476	0.0275862	0.928094	0.921603	0.583643	0.0212072	0.0474684	0.744681	0.076661	0.686007	0.716648	0.0121376	0.0109489	0.0258621	0.00774443	0.0318888	0.0169306	0.0225451
CGDMR	4004	Bd1-1	Bd1	32883200	32883399	199	hyper	0.8	0.693548	0.0322581	0.933333	0.458333	0.530612	0.341463	0.032967	0	0	0	0.0333333	0	0.0178571	0.00692042	0.00711744	0.017341	0.0212766	0	0	0
CGDMR	4009	Bd1-1	Bd1	32933300	32933499	199	hyper	0.978022	0.696429	0.0526316	0.931034	1	0.943005	0.0178571	0.451923	0.342466	0.08	0.5625	0.555556	0.55042	0.0322581	0.0108992	0.0242915	0	0.00917431	0.0181818	0.0102273	0
CGDMR	4015	Bd1-1	Bd1	33000800	33001499	699	hypo	0.00657895	0.0163934	0.977444	0	0.868852	0.938095	0.605096	0	0.0226244	0.46087	0	0.330769	0.226562	0.101351	0.00880088	0.0032077	0.010219	0.0206186	0.00886263	0.00118906	0.00870511
CGDMR	4016	Bd1-1	Bd1	33003000	33003199	199	hypo	0	1	1	0	0.583333	0.931034	0	0	0.5	0.333333	0	0	0.428571	0	0	0.0134048	0.0131579	0	0	0	0
CGDMR	4024	Bd1-1	Bd1	33054900	33055099	199	hyper	0.930233	0.448276	0	0	0.0909091	0.470588	0.314286	0.689655	0.125	0.0384615	0.0384615	0.0416667	0.130435	0.0917431	0.0192926	0.0153846	0	0	0.0128755	0.00621118	0.00610998
CGDMR	4026	Bd1-1	Bd1	33069200	33069399	199	hyper	0.983425	1	0.0238095	0	0.938547	0	0.0173913	0.743902	0.836478	0.05	NA	0.578313	0	0	0.0137773	0.00561798	0	0.0625	0.0173697	0.0192308	0.00260417
CGDMR	4028	Bd1-1	Bd1	33070400	33070599	199	hypo	0.129032	0.897959	1	0.584416	0.307692	0.8125	0.96	0.115385	0.527778	0.121212	0.0232558	0	0	0.103448	0.0307692	0.00584795	0	0	0	0	0
CGDMR	4030	Bd1-1	Bd1	33077200	33077499	299	hyper	0.944251	0.00900901	0.00571429	0	0.0174216	0	0.00308642	0.324675	0.00757576	0.0235294	0.00952381	0.0144231	0.0037594	0.00510204	0.126943	0.00383142	0.00772201	0.0046729	0.00324675	0.0106195	0.00232019
CGDMR	4032	Bd1-1	Bd1	33080800	33080999	199	hypo	0.0188679	0	0.909091	0	NA	0	0	0	NA	0	NA	NA	0	0	0	0.0116279	0	0	0	0	0.0217391
CGDMR	4036	Bd1-1	Bd1	33097500	33097699	199	hyper	0.841727	0.971014	0	0.781513	0.96875	1	0	0.370968	0.551546	0.0625	0.44186	0.392857	0.359375	0	0.008	0.0084317	0.0229885	0.0347826	0.0231214	0	0.00641026
CGDMR	4039	Bd1-1	Bd1	33108700	33109099	399	hyper	0.96408	0.970618	0.0116732	0.974684	0.964093	0.971654	0.0235294	0.28801	0.51371	0.0201149	0.590431	0.73125	0.37877	0.00756144	0.0267857	0.00594228	0.0624187	0.00474683	0.0230303	0.00785973	0.0151388
CGDMR	4043	Bd1-1	Bd1	33124600	33124899	299	hypo	0	0.94	1	0.956989	0.979866	0.958175	0.0858896	0	0.790698	0.541667	0.668508	0.629371	0.825342	0.0292398	0	0	0	0.00742574	0.0162338	0.016092	0.00342466
CGDMR	4046	Bd1-1	Bd1	33131700	33131899	199	hyper	0.764706	0	0	0	0	0	0	0	0.0111111	0	0	0	0	0	0.0135135	0.00311526	0	0.025	0.0323887	0	0.00757576
CGDMR	4047	Bd1-1	Bd1	33132100	33132299	199	hyper	0.973451	0	0	0	0.166667	0	0	0.0120482	0.0217391	0	0	0	0	0.102041	0.00996678	0	0	0.021978	0	0	0
CGDMR	4048	Bd1-1	Bd1	33132500	33132699	199	hyper	0.768	0	0	0	0.0111111	0	0	0	0.0294118	0	0	0	0.0833333	0	0.00337838	0	0.0144928	0.00675676	0.00978474	0.00711744	0
CGDMR	4053	Bd1-1	Bd1	33138700	33138899	199	hypo	0	0.94359	0.902985	0.963768	0.982456	0.979592	0.965839	0	0.441696	0.522293	0.845238	0.514599	0.745902	0.793372	0.0434783	0.00391389	0.00909091	0.009375	0.0180587	0.0176991	0.00380711
CGDMR	4054	Bd1-1	Bd1	33144500	33144999	499	hypo	0.0078125	0.977174	0.985294	0	0.961972	0	0.00195312	0.0208333	0.719165	0.658228	0	0.785542	0.00568182	0.010989	0.00684931	0.025282	0.0198366	0	0.0168309	0.00382166	0.00755034
CGDMR	4055	Bd1-1	Bd1	33160800	33161099	299	hypo	0	0.0232558	0.930851	0.882353	0.960954	0.919075	0.93133	0.0277778	0.0120482	0.128205	0.0222222	0.389655	0.388889	0.122507	0.0101351	0.00816993	0.0133038	0.0202247	0.0127854	0.0129534	0.00262009
CGDMR	4057	Bd1-1	Bd1	33166200	33166399	199	hypo	0.0133333	0	1	0.4	0	0.96875	0	0	0	0.75	0	0	0.714286	0.0909091	0	0	0	0	0	0.00352113	0
CGDMR	4059	Bd1-1	Bd1	33206600	33206799	199	hypo	0	0	0.888889	0	0	0	0.747126	0	0.0909091	0.7375	0.0909091	0	0.0227273	0.46875	0.00881057	0.0135135	0.0926966	0	0	0.00694444	0.0804795
CGDMR	4068	Bd1-1	Bd1	33279200	33280099	899	hyper	0.915737	0.906977	0.00660793	0.0239044	0.87699	0.00724638	0.00094162	0.704397	0.754083	0.00859599	0.0368098	0.770156	0.0140187	0.0155807	0.00849649	0.0147462	0.00558659	0.00468384	0.014863	0.000907441	0.00330688
CGDMR	4069	Bd1-1	Bd1	33280200	33280499	299	hyper	0.968927	0.986726	0	0.0222222	0.952141	0	0.0101523	0.848138	0.912195	0	0	0.969605	0.00699301	0.00540541	0.0361991	0.0172932	0	0.00673401	0.0109127	0.00607287	0.00139082
CGDMR	4070	Bd1-1	Bd1	33280600	33281099	499	hyper	0.967687	0.95	0	0.0103093	0.972527	0	0.0174927	0.697026	0.709906	0.00719425	0	0.818616	0	0.00746269	0.0121107	0.0113333	0	0	0.0089717	0	0.0034965
CGDMR	4073	Bd1-1	Bd1	33282600	33282899	299	hyper	1	1	0	NA	0.666667	0	0.193548	0.773585	0.95122	0	NA	0.909091	0.0465116	0	0.00693241	0.00480769	0	NA	0	0.0135135	0.0105634
CGDMR	4074	Bd1-1	Bd1	33283200	33283399	199	hyper	0.9375	1	0	0	1	0	0.105263	0.827273	0.842975	0	0	0.9	0	0	0.00771208	0.0105708	0	0.05	0.0238095	0	0
CGDMR	4076	Bd1-1	Bd1	33284600	33284799	199	hyper	0.952569	0.954167	0	NA	0.957447	0.0434783	0.0689655	0.787546	0.795761	0	NA	0.812227	0.05	0.126582	0.00690449	0.00401069	0.00851064	NA	0	0.013986	0
CGDMR	4077	Bd1-1	Bd1	33284900	33285899	999	hyper	0.984419	0.942704	0	0.00925926	0.956291	0.0070922	0.0131579	0.692646	0.73493	0.0272109	0	0.839384	0.00212314	0.0180921	0.0138858	0.014658	0.00452489	0	0.012919	0.00662983	0.00206897
CGDMR	4079	Bd1-1	Bd1	33286900	33287099	199	hyper	0.9	1	0	NA	1	0	0.222222	0.533333	1	0.0833333	NA	NA	0	0.333333	0.0196078	0.0165289	0	NA	0	0	0.016129
CGDMR	4080	Bd1-1	Bd1	33315200	33315399	199	hypo	0.0149254	0	0.84375	0	0	0.015625	0	0.015625	0	0.552632	0	0	0	0	0.00192308	0.00588235	0	0.0204082	0.0060241	0	0.0078125
CGDMR	4081	Bd1-1	Bd1	33316100	33316299	199	hypo	0.169811	0.969466	1	1	0.916667	1	0.721519	0.15	0.666667	0.870968	0.8	0.631579	0.8125	0.444444	0.0147059	0.00757576	0.0851064	0	0.0172414	0.015748	0.0482759
CGDMR	4082	Bd1-1	Bd1	33316400	33316699	299	hypo	0.0726496	0.0857143	0.95625	0.977099	0.892405	0.983122	0.0772059	0.0406977	0.047619	0.786667	0.717742	0.386207	0.719048	0.010989	0.014862	0.0168634	0.00973236	0.035443	0.0181818	0.0159744	0.0206186
CGDMR	4083	Bd1-1	Bd1	33326100	33326299	199	hypo	0	0.368421	0.75	0	0.25	0.25	0	0	0.0823529	0.0285714	0	0	0.0588235	0	0.0122699	0.00980392	0	0	0.025	0	0.00571429
CGDMR	4092	Bd1-1	Bd1	33362500	33362899	399	hypo	0.00917431	0.892235	0.943723	0.942149	0.956933	0.926346	0.00740741	0.0264706	0.109533	0.44868	0.180952	0.210875	0.0774648	0.00961539	0.00328587	0.0113438	0.00718563	0.0126103	0.00916442	0.00530303	0.0046225
CGDMR	4093	Bd1-1	Bd1	33369300	33369699	399	hypo	0.0151515	0.920709	0.964467	0.973978	0.896964	0.925926	0.945976	0.0101523	0.547445	0.533333	0.689394	0.622222	0.629687	0.613402	0.0045045	0.0103599	0.0105465	0.0179806	0.0104396	0.00985707	0.00970874
CGDMR	4098	Bd1-1	Bd1	33417500	33417699	199	hyper	0.891429	0.0108696	0.00645161	0.0172414	0.00826446	0.0206186	0.800819	0.542254	0.00664452	0.0144928	0	0.00564972	0.0185185	0.617304	0.0552486	0.00343643	0	0	0	0.0238095	0
CGDMR	4099	Bd1-1	Bd1	33417800	33417999	199	hyper	0.940367	0.00386847	0	0.00980392	0.00294118	0.0492754	0.98	0.311688	0.00396825	0.0245902	0	0	0.0251572	0.456522	0.0114286	0	0.00653595	0	0	0.00469484	0.00420168
CGDMR	4100	Bd1-1	Bd1	33418200	33418399	199	hyper	0.804082	0.0900901	0.109091	0.37931	0.125	0.0716332	0.974194	0.356436	0.0334928	0.0551181	0.433333	0.030303	0.0772727	0.621212	0.0169492	0.0432767	0.0285714	0	0.0765766	0.0974633	0.0358974
CGDMR	4101	Bd1-1	Bd1	33418600	33418899	299	hypo	0.030303	0.837696	0.896552	0.05	0.884058	0.814815	0.0172414	0.0172414	0.0540541	0.346939	0.0645161	0	0.0737705	0.0136986	0.00152905	0.00381679	0.0183246	0.0117647	0.0113422	0.0367647	0
CGDMR	4104	Bd1-1	Bd1	33427700	33427899	199	hypo	0	0.822485	0.980198	0.926471	0.840336	0	0.526316	0.0379747	0.517241	0.747126	0.826087	0.647619	0.0344828	0.16	0.00374532	0.181967	0.16358	0.0110701	0.148615	0	0.0491803
CGDMR	4107	Bd1-1	Bd1	33446400	33446999	599	hyper	0.968905	0.0125786	0.0120482	0.988235	0.00767263	0.0141988	0.980726	0.627273	0.0116959	0.0163934	0.523002	0.00461894	0.0110865	0.310314	0.0107172	0.0142276	0.00476947	0.0198511	0.00359712	0.00334821	0.0196998
CGDMR	4109	Bd1-1	Bd1	33447900	33448099	199	hypo	0	NA	1	NA	1	0	0	0	NA	0	NA	0	0	0.2	0	NA	0	NA	0.027027	0	0
CGDMR	4115	Bd1-1	Bd1	33473200	33473399	199	hypo	0.12	1	1	0.933333	0.166667	0	1	0	0	0	0.0204082	0	0	0	0.00762195	0.00564972	0.00520833	0	0	0.00819672	0.00740741
CGDMR	4116	Bd1-1	Bd1	33478100	33478299	199	hypo	0.0555556	0.967213	1	1	0.952381	1	0.955882	0.12	0.73913	0.714286	NA	0.8	0.8	0.892857	0.0626959	0.127962	0.070922	0	0.0125	0.0724638	0.0497925
CGDMR	4117	Bd1-1	Bd1	33478500	33479599	1099	hypo	0.0460081	0.965849	0.968561	0.939317	0.958446	0.968306	0.940718	0.0315615	0.710657	0.760933	0.866667	0.827893	0.765668	0.7661	0.0156028	0.0244366	0.11817	0.0204271	0.0360911	0.0383436	0.0894995
CGDMR	4124	Bd1-1	Bd1	33532100	33532299	199	hyper	0.948454	0	0	NA	NA	0	0	0.00434783	0	0.0526316	NA	NA	0	0	0.00262467	0	0.0833333	0	NA	0	0
CGDMR	4129	Bd1-1	Bd1	33590100	33590299	199	hyper	0.924242	0	0.0253165	0	0	0.0103093	0.00833333	0.686275	0	0	0	0	0.0196078	0	0.0681818	0	0	0	0.0130719	0	0.0042735
CGDMR	4137	Bd1-1	Bd1	33627500	33628199	699	hypo	0.0331126	0.0277778	0.95	0.0731707	0.015873	0.973166	0.018018	0.0217391	0.00819672	0.837288	0	0.0446429	0.839406	0.0348837	0.00977517	0.00365408	0.00842105	0.00809717	0	0.00671488	0.0168067
CGDMR	4139	Bd1-1	Bd1	33647200	33647899	699	hyper	0.974026	0.00763359	0.0154867	0	0.00116822	0.0157576	0.00613497	0.519108	0.0404531	0.0977918	0.0741935	0.0515807	0.0361011	0.029304	0.00812183	0.042024	0.110708	0.0804878	0.0267327	0.0372233	0.037037
CGDMR	4141	Bd1-1	Bd1	33661000	33661199	199	hypo	0	0	0.86	0.72	0	0.916667	0.746479	0	0	0.734177	0.762712	0	0.652632	0.82	0.0163934	0	0.35461	0.423237	0	0.303951	0.422397
CGDMR	4143	Bd1-1	Bd1	33677300	33677499	199	hypo	0	0.938776	1	0.944444	0.923077	0.970588	0.978261	0.00900901	0.00826446	0.04	0.0363636	0.0289855	0	0.0283019	0.00531915	0	0	0.00628931	0	0.00416667	0.00568182
CGDMR	4144	Bd1-1	Bd1	33681200	33681499	299	hypo	0	0	0.921875	0	0	0.590909	0	0	0	0.868421	0	0	0.542857	0	0.00701754	0.0138249	0.0236486	0	0	0.0129032	0.00280112
CGDMR	4145	Bd1-1	Bd1	33683800	33684599	799	hyper	0.941622	0.00859599	0.00900901	0.00847458	0.0114068	0.00554324	0.0146042	0.632	0.0113636	0.0134228	0.00425532	0.00726392	0.00522648	0.0133983	0.0946328	0.00315956	0	0	0.00608519	0.00549451	0.084724
CGDMR	4146	Bd1-1	Bd1	33686600	33687199	599	hyper	0.949425	0	0.0232558	0.015873	0.0153846	0.0167598	0.0046729	0.640891	0.00537634	0	0	0.0125	0.0104895	0.00625	0.0183853	0.00823422	0.0130081	0	0.0046729	0.0133156	0.00757576
CGDMR	4149	Bd1-1	Bd1	33702200	33702399	199	hypo	0.1	0.926087	0.890756	0.982301	0.759259	0.950178	0.763699	0.171053	0.858333	1	0.9375	0.903226	0.868421	0.89441	0.00488998	0.0151025	0.030426	0.039666	0.0331126	0.0339589	0.0114379
CGDMR	4154	Bd1-1	Bd1	33805300	33805599	299	hypo	0	0	0.967742	0	0.4	NA	0	0.05	0.0384615	0.393939	0.666667	0	0.4	0.114286	0.00392157	0.00925926	0.02	0	0	0.192308	0.0232558
CGDMR	4159	Bd1-1	Bd1	33837200	33837399	199	hyper	0.783582	0.754286	0	0.354839	0.935484	0.409639	0.681034	0.0631579	0.00607903	0.00666667	0	0	0	0.00342466	0.0403646	0.00118906	0.00729927	0.020979	0	0.00498753	0.00280112
CGDMR	4161	Bd1-1	Bd1	33843800	33843999	199	hypo	0.00833333	0.971246	0.960526	0.666667	0.967568	0.952174	0.978182	0.0172414	0.417197	0.411765	0.75	0.565445	0.491228	0.582418	0.0262582	0.0104408	0	0.0588235	0.00612245	0.0148368	0.00527009
CGDMR	4164	Bd1-1	Bd1	33861200	33861399	199	hyper	0.9	0.367521	0	0	0.54	0	0.377778	0.00947867	0	0	0	0.0217391	0.00990099	0.00694444	0.015	0.00591716	0	0	0.015625	0.0125786	0
CGDMR	4168	Bd1-1	Bd1	33902400	33902899	499	hyper	0.961832	0.00555997	0.00915332	0.0122951	0.0126582	0.0104895	0.00752587	0.621673	0.0140187	0.0142857	0.00754717	0.0215054	0.0154867	0.0143885	0.0618687	0.0199667	0.0174419	0.0174672	0.0131868	0.00453515	0.00542496
CGDMR	4171	Bd1-1	Bd1	33928300	33928499	199	hypo	0.0097561	0	0.936842	0.00833333	0.0240964	0.0185185	0.00609756	0.03125	0	0.259259	0	0	0	0	0.00527705	0	0	0	0.0175439	0	0.0104895
CGDMR	4181	Bd1-1	Bd1	33974500	33974799	299	hypo	0.00862069	0.524138	0.945946	0.00357143	0.0146341	0.144828	0.00643087	0.012987	0.178862	0.642857	0	0.0289855	0.0361446	0.020202	0.0136778	0.00462963	0.0267857	0.0164835	0.00925926	0	0.00199203
CGDMR	4186	Bd1-1	Bd1	33995500	33995799	299	hypo	0.0136986	0.935484	0.97351	0.97973	0.977679	0.992063	0.963039	0.0106762	0.743658	0.855556	0.90625	0.86631	0.811321	0.806034	0	0.00948132	0.0110132	0.0153509	0.020649	0.0107219	0.014153
CGDMR	4187	Bd1-1	Bd1	33995900	33996199	299	hypo	0	0.980488	0.986667	0.973684	0.922414	0.994444	0.951327	0.0177215	0.814972	0.838863	0.885827	0.895349	0.834921	0.837386	0.0111465	0.00633413	0.0103093	0.0106952	0.0131148	0.00638686	0.0104083
CGDMR	4189	Bd1-1	Bd1	33996600	33996799	199	hypo	0	0.941026	1	0.980892	0.923423	0.95107	0.962766	0.00571429	0.725564	0.814815	0.783784	0.829412	0.794521	0.833333	0.00449438	0.0151844	0.0165563	0.00464037	0.00622084	0.0241423	0.00684931
CGDMR	4190	Bd1-1	Bd1	33996900	33997399	499	hypo	0.00653595	0.917981	0.985149	0.984848	1	0.95	0.970684	0.0201613	0.67509	0.745562	0.757143	0.753333	0.597458	0.70229	0.00986547	0.0062167	0.0115979	0.0103093	0.0160643	0.0107527	0.0136876
CGDMR	4191	Bd1-1	Bd1	33997500	33998199	699	hypo	0.0333333	0.941807	0.99308	0.957529	0.986885	0.983229	0.987179	0.0157895	0.758701	0.675258	0.785377	0.859091	0.730408	0.840467	0.00353357	0.0066726	0.00737327	0.00610288	0.0089141	0.00859599	0.00724638
CGDMR	4194	Bd1-1	Bd1	34013600	34014299	699	hyper	0.959719	0.0078125	0.0264026	0.94032	0.00319489	0.00674536	0.947025	0.53108	0.012987	0.0159574	0.431111	0.00578035	0.0084507	0.427215	0.00908373	0.00553505	0.0169492	0.0131868	0.0060698	0.00273224	0.0199765
CGDMR	4195	Bd1-1	Bd1	34014400	34014599	199	hyper	0.96875	0.0152672	0	0.860294	0	0.0258621	0.940741	0.653333	0.015625	0	0.268817	0.0103093	0.00826446	0.731278	0.0102564	0.0174419	0	0.0275229	0	0.0104167	0.00229885
CGDMR	4198	Bd1-1	Bd1	34023600	34024499	899	hyper	0.958228	0.00532481	0.00790514	0	0.00645995	0.0114416	0.972539	0.65456	0.00441826	0.00625	0.00271003	0.015534	0.0109204	0.746588	0.04537	0.007431	0.00152439	0.0016835	0.00843373	0.00712589	0.0574968
CGDMR	4200	Bd1-1	Bd1	34026000	34026899	899	hyper	0.94795	0.00624025	0.015748	0.0163934	0.00261097	0	0.977941	0.571146	0.00925926	0.00507614	0	0.00390625	0	0.711507	0.0125992	0.0074184	0.00607903	0.00345423	0.0033841	0.00485909	0.0117832
CGDMR	4209	Bd1-1	Bd1	34113400	34113799	399	hyper	0.939759	0.0209924	0.0243902	0.0471204	0.00940439	0.0172043	0.0139535	0.527027	0.0150754	0.0140845	0	0	0.010101	0	0.00582524	0.0149457	0.025788	0.0167224	0.003367	0.0190058	0.00618238
CGDMR	4211	Bd1-1	Bd1	34142900	34143099	199	hyper	0.939394	0.962264	0	NA	0	0.933333	1	0.444444	0.491803	0	NA	0	0.885246	0.875	0.0172414	0.010989	0	NA	0.0392157	0.0134529	0.0143541
CGDMR	4215	Bd1-1	Bd1	34170500	34171099	599	hypo	0.0233333	0.974513	0.99262	0.978056	0.962422	0.95993	0.00966184	0.0532688	0.691415	0.6875	0.729345	0.738255	0.668387	0.0117188	0.0166994	0.00804505	0.00619835	0.0152905	0.00909091	0.00955734	0.0162602
CGDMR	4216	Bd1-1	Bd1	34178100	34178299	199	hypo	0	0.114943	0.837209	0.0833333	0.979899	0.0133333	0	0.00471698	0.0373832	0.107595	0	0.734742	0.0204082	0.0148515	0.0104167	0.0136054	0.0114613	0	0.00549451	0.0106383	0
CGDMR	4225	Bd1-1	Bd1	34264700	34264999	299	hypo	0	0.354167	1	0.666667	0.5	0.533333	0.0638298	0	0.146067	0.5	0.333333	0.0625	0.545455	0.18	0.00806452	0.0794979	0.0390625	0.037037	0.152174	0.148936	0.0618557
CGDMR	4228	Bd1-1	Bd1	34287600	34287799	199	hyper	0.811224	0.025	0	0	0.0196078	0	0.0144928	0.128405	0.0285714	0.0149254	0	0.016129	0.0206186	0	0.0146699	0	0.0108696	0	0	0.0152672	0.00621118
CGDMR	4231	Bd1-1	Bd1	34290600	34291399	799	hyper	0.934132	0.00757576	0.0141844	0.0173913	0.00668896	0.0114943	0.00928793	0.227134	0.00233645	0.00653595	0.017094	0.0167131	0.00743494	0.00576369	0.0101892	0.0060652	0	0.0177665	0.00613497	0.00672948	0.00668151
CGDMR	4232	Bd1-1	Bd1	34291600	34291799	199	hyper	0.900709	0	0	0	0	0.04	0.946309	0.43617	0	0	0	0	0	0.183099	0.00769231	0.0214724	0	0.0322581	0	0.0178571	0.0104822
CGDMR	4233	Bd1-1	Bd1	34291900	34292199	299	hyper	0.951299	0.0141844	0	0.0714286	0	0.045977	0.830709	0.8	0.0294118	0	0	0.0136986	0	0.641618	0.0640523	0.00547945	0	0	0	0	0.0371681
CGDMR	4237	Bd1-1	Bd1	34311800	34312399	599	hyper	0.923155	0.00450958	0.0142857	0.972887	0.00909091	0.022493	0.836925	0.417883	0.0056338	0.0106007	0.729682	0.0178174	0.0678439	0.560144	0.0174588	0.00146628	0.00643777	0.0127436	0.0166113	0.064877	0.0236994
CGDMR	4243	Bd1-1	Bd1	34351100	34351399	299	hypo	0.016	0.959184	0.984496	0.991379	0.980392	0.986667	0.972763	0.0125	0.830247	0.919255	0.862745	0.87069	0.828283	0.831288	0.00662252	0.0109756	0.00254453	0.0203106	0.00445633	0.005	0.0104167
CGDMR	4244	Bd1-1	Bd1	34352100	34352299	199	hypo	0.0571429	0.958904	1	1	1	1	0.971963	0	0.789916	0.69863	0.853659	0.584906	0.721154	0.813725	0.00387597	0.00437318	0.0117994	0	0.0179949	0.0316574	0.0107066
CGDMR	4245	Bd1-1	Bd1	34352500	34353099	599	hypo	0.00641026	0.933566	0.977444	0.952941	0.974619	0.980769	0.966887	0.0106952	0.841481	0.918367	0.91029	0.899743	0.752551	0.864065	0.00302725	0.00654582	0.00472813	0.00613497	0.00992366	0.0124521	0.0138889
CGDMR	4246	Bd1-1	Bd1	34353200	34353499	299	hypo	0.0125	0.964744	0.990991	1	0.988571	0.954717	0.968571	0	0.875614	0.881773	0.902724	0.778157	0.909441	0.865103	0.00514139	0.00784034	0.00824742	0.0182119	0.0142303	0.00645682	0.015467
CGDMR	4247	Bd1-1	Bd1	34353600	34353799	199	hypo	0.0707071	0.97619	1	0.983146	0.978339	0.979381	0.955665	0.0666667	0.730864	0.67364	0.933036	0.609943	0.677871	0.378307	0.00840336	0.0119306	0.00513699	0.0109689	0.00646726	0.0189633	0.0102389
CGDMR	4248	Bd1-1	Bd1	34364800	34364999	199	hypo	0.0263158	1	1	NA	1	1	1	0.0394737	0.837838	0.803571	0.92	0.8125	0.7625	0.918919	0.00578035	0.00269542	0.0103806	0.015625	0.0162162	0.010101	0.00713013
CGDMR	4249	Bd1-1	Bd1	34365200	34366199	999	hypo	0.00661521	0.960308	0.967099	0.979253	0.952249	0.971744	0.973433	0.00946074	0.736192	0.781735	0.788673	0.779855	0.760412	0.750172	0.00953516	0.00903433	0.00852558	0.0208442	0.0129726	0.019435	0.013277
CGDMR	4258	Bd1-1	Bd1	34388900	34389099	199	hyper	0.873065	0	0.0540541	0.08	0.183908	0.992188	0	0.47619	0	0.0540541	0	0.05	0.830508	0.0208333	0.00952381	0.00448431	0.00543478	0	0	0.00505051	0
CGDMR	4264	Bd1-1	Bd1	34437600	34438299	699	hypo	0.00890208	0.0259259	0.977273	0.084507	0.0140845	0.972756	0	0.00864553	0.00632911	0.753769	0	0	0.791667	0.0138122	0.00775741	0.00310559	0.00954979	0.00589391	0.0144231	0.0130495	0.00380518
CGDMR	4266	Bd1-1	Bd1	34439600	34439799	199	hyper	0.979798	0	0	NA	0	0	0.0434783	0.163636	0	0	NA	0	0	0	0	0.0192308	0	NA	0	0.0192308	0.0123457
CGDMR	4267	Bd1-1	Bd1	34439900	34440399	499	hyper	0.97992	0.00905563	0.0330579	0.00813008	0.0309917	0.00659631	0.00632911	0.191155	0.00952381	0.0352113	0.00649351	0.00411523	0.00963855	0.00998004	0.0723926	0.00986842	0.0181818	0	0	0.0113636	0
CGDMR	4268	Bd1-1	Bd1	34542600	34543299	699	hypo	0.0233702	0.967963	0.972222	0.973498	0.973542	0.938505	0.972472	0.0164745	0.455041	0.459716	0.212051	0.5613	0.0725907	0.363571	0.0087241	0.00854214	0.00647249	0.00434028	0.0143567	0.0102996	0.0215938
CGDMR	4269	Bd1-1	Bd1	34557800	34558299	499	hypo	0.0426009	0.947552	0.992126	0.0590164	0.952562	0.888027	0.964844	0.0190779	0.317844	0.394068	0.0617978	0.243728	0.153565	0.32872	0.0139319	0.0188172	0	0.0195122	0.0075188	0.0131752	0.0417266
CGDMR	4271	Bd1-1	Bd1	34560600	34560799	199	hyper	0.944444	0.976744	0	1	0.25	0.9	0	0	0.272727	0	0	NA	0	0	0.0143541	0.00341297	0.00763359	0.0166667	0	0.0204082	0
CGDMR	4273	Bd1-1	Bd1	34629000	34629699	699	hyper	0.948775	0.00685714	0.00275482	0.0138408	0.0128205	0.0154639	0.00488998	0.277865	0.0091047	0.0156863	0.00440529	0.0102564	0.0143369	0.010989	0.0060208	0.0066313	0.00304414	0.00977995	0.00369004	0.00613497	0.00732601
CGDMR	4274	Bd1-1	Bd1	34632900	34633099	199	hyper	1	0.708738	0	1	0.575	0.862069	NA	0	0.047619	0	1	0	0.25	0	0	0.0877193	0.1	0	0	0.0135135	0
CGDMR	4276	Bd1-1	Bd1	34644300	34644999	699	hyper	0.976604	0.0296084	0.00479233	0.0130597	0.0441558	0.0111266	0.00527705	0.646604	0.00445765	0.0103448	0.0299145	0.0202312	0.0164271	0.00564972	0.0183631	0.0118421	0.00804289	0	0	0.00801603	0.00913242
CGDMR	4277	Bd1-1	Bd1	34657000	34657299	299	hypo	0.0382166	0.965318	0.978102	0.983333	0.951002	0.975477	0.974811	0.00917431	0.606383	0.609091	0.395161	0.625498	0.574713	0.677885	0	0.00832342	0.0138889	0.0160714	0.019802	0.0227818	0.017316
CGDMR	4278	Bd1-1	Bd1	34660200	34660899	699	hyper	0.98037	0.00796813	0.0243902	0	0.0842105	0.0201342	0.0161943	0.816254	0.00289855	0.0112994	0	0.00628931	0	0.00280112	0.0140318	0.00641026	0.00756144	0.0105263	0	0.00167224	0.00812065
CGDMR	4279	Bd1-1	Bd1	34661000	34661399	399	hyper	0.964083	0.015444	0.0245902	0	0.0897436	0.131148	0.0135135	0.74115	0.026616	0.00787402	0	0	0.0775194	0.0165289	0.0130976	0.001	0.00566572	0.00775194	0.00413223	0.00789474	0.00581395
CGDMR	4280	Bd1-1	Bd1	34661700	34662099	399	hyper	0.951691	0.0803571	0.0212766	0.078125	0.105263	0.0673077	0.0274725	0.862141	0.0138504	0.0217391	0.348361	0.005291	0.0147929	0.0100402	0.00859107	0.00391645	0.013289	0.00815217	0.00806452	0.00737463	0.00827206
CGDMR	4282	Bd1-1	Bd1	34662700	34662899	199	hyper	0.916667	0	0	1	0.26087	1	0	0.803922	0	0.0769231	0.714286	0	0.914894	0.0470588	0.00565771	0	0	0	0	0.00420168	0.00325733
CGDMR	4283	Bd1-1	Bd1	34663000	34663199	199	hyper	0.92	0.057971	0	0.9	0	0.983871	0	0.833333	0	0	0.739726	0.0526316	0.792208	0	0.0264228	0	0	0.0191257	0.027933	0.00555556	0.00292398
CGDMR	4284	Bd1-1	Bd1	34663300	34664399	1099	hyper	0.884203	0.723096	0.00996678	0.875	0.376392	0.977509	0.555689	0.488522	0.274738	0.0217391	0.603727	0.0573123	0.744301	0.0950745	0.0183348	0.007996	0.0133511	0.0185185	0.0157233	0.0113065	0.00479488
CGDMR	4285	Bd1-1	Bd1	34673200	34673399	199	hypo	0.0724638	0.560976	0.909091	0	0.708333	0.526316	0.625	0.00454546	0	0	0	0	0	0.00952381	0.00297619	0.00543478	0.0217391	0	0	0.0070922	0
CGDMR	4288	Bd1-1	Bd1	34696600	34696799	199	hyper	0.963415	0.0153846	0.027027	0	0	0.265625	0.025974	0.00847458	0.0617284	0.0204082	0	0.0454545	0.0128205	0.00990099	0.00986193	0.00289017	0.00757576	0	0	0.00304878	0.0056338
CGDMR	4294	Bd1-1	Bd1	34764000	34764399	399	hypo	0.00641026	0.985816	0.989529	0.991803	0.962145	0.930233	0.982692	0	0.802508	0.761364	0.827004	0.811209	0.745833	0.83965	0.00954198	0.00647016	0.0145985	0.0140515	0.0127077	0.00773481	0.00910273
CGDMR	4295	Bd1-1	Bd1	34764500	34764899	399	hypo	0.0178571	0.989583	1	1	1	0.97561	0.951613	0.0263158	0.754237	0.844444	0.974359	0.962963	0.656716	0.795455	0.00687285	0.00865801	0.00534759	0.0103093	0.021978	0.00411523	0.00298507
CGDMR	4296	Bd1-1	Bd1	34765000	34765399	399	hypo	0.00704225	0.961977	0.981685	0.979167	0.95438	0.961538	0.948686	0.0446927	0.682676	0.846743	0.85119	0.874227	0.459649	0.792388	0.00847458	0.0120096	0.0164179	0.0236486	0.0112263	0.00268817	0.0143541
CGDMR	4301	Bd1-1	Bd1	34804600	34805499	899	hypo	0.0550098	0.964115	0.978723	0.653595	0.587678	0.957845	0.924694	0.0176744	0.0569697	0.227405	0.11509	0.0700637	0.197747	0.165128	0.0105374	0.0112657	0.00617284	0.00555556	0.0190996	0.0103785	0.0119926
CGDMR	4310	Bd1-1	Bd1	34891700	34891899	199	hypo	0.0416667	0.0294118	0.992366	0	0.075	0.111111	0.0989011	0.0283912	0	0.732218	0.00684931	0	0.0212766	0.0445682	0.0123203	0	0.0152566	0	0.0174672	0	0.00426439
CGDMR	4314	Bd1-1	Bd1	34954700	34955299	599	hyper	0.961702	0.0204499	0.0289256	0.0196078	0.0121951	0.0113636	0.0162272	0.816038	0.00996678	0.0188088	0	0.00333333	0.00761421	0	0.0143266	0.00621118	0.00954198	0	0.00673401	0.00470588	0.00195312
CGDMR	4322	Bd1-1	Bd1	35020200	35020599	399	hypo	0.026538	0.9797	0.985043	0.983333	0.95739	0.965594	0.981792	0.0125261	0.79386	0.683333	0.850144	0.778539	0.664783	0.786946	0.00845666	0.0473827	0.0802644	0.0365535	0.02118	0.0554202	0.0288564
CGDMR	4328	Bd1-1	Bd1	35148000	35148299	299	hypo	0.0754717	0.108108	0.963415	0.594595	0.159091	0.838983	0.27	0.030303	0	0.364865	0.03125	0.0222222	0.240506	0.0315789	0.0040404	0	0.00228833	0.00534759	0.015	0.00958466	0.0074813
CGDMR	4329	Bd1-1	Bd1	35191200	35191799	599	hyper	0.949843	0.01566	0.0297872	0.0125392	0.016129	0.0173697	0.019943	0.524173	0.00417537	0	0.00295858	0.0115741	0.0151515	0.004914	0.0252918	0.00521921	0.0142518	0.00625	0.0121951	0.00348432	0.00729927
CGDMR	4333	Bd1-1	Bd1	35214700	35214999	299	hyper	0.995902	0.0344828	0	0	0.0588235	0.0273973	0.0327869	0.790909	0.015625	0	0	0.06	0.0434783	0.00854701	0.0130785	0	0.00662252	0	0.00286533	0.00228311	0
CGDMR	4335	Bd1-1	Bd1	35242200	35242399	199	hypo	0.025	0.931507	0.909091	0.0625	0.689655	0.820513	0.322034	0	0.575758	0.75	0	0.222222	0.71875	0.615385	0	0	0	0	0	0.00409836	0
CGDMR	4340	Bd1-1	Bd1	35379300	35379499	199	hyper	1	0.0810811	0	0.1	0	0	0.0322581	0	0.0384615	0.0222222	0.0666667	0	0	0.0227273	0	0.0121951	0.00854701	0	0	0	0
CGDMR	4345	Bd1-1	Bd1	35476500	35476799	299	hyper	0.816619	0.599359	0	0.0314961	0.821429	0.0181818	0.00434783	0.274194	0.210256	0	0	0.26087	0	0	0.0582524	0.0385208	0	0.0133333	0.0336134	0.00425532	0.00729927
CGDMR	4347	Bd1-1	Bd1	35554500	35554899	399	hypo	0.0220588	0.970954	0.974522	0.938462	0.970213	0.982759	0.0275862	0.0160643	0.826855	0.810056	0.634409	0.860947	0.892193	0.00877193	0	0.00325733	0.00931677	0.0147059	0.0253165	0.00902934	0.00323625
CGDMR	4348	Bd1-1	Bd1	35555000	35555299	299	hypo	0.0377358	0.969697	0.951807	0.166667	0.963351	0.980315	0.142857	0	0.77037	0.801282	0	0.836364	0.829457	0.173913	0.019802	0.0206379	0.0503597	0	0.0242826	0.0205761	0
CGDMR	4350	Bd1-1	Bd1	35556800	35556999	199	hypo	0.0204082	0	1	0	0.973333	0.930693	0	0.0103093	0	0.970149	0	0.869565	0.927461	0	0.00877193	0.00584795	0.0183486	0	0.00645161	0.0177384	0
CGDMR	4352	Bd1-1	Bd1	35655400	35655599	199	hyper	0.826923	0	0	NA	0	0.865385	0	0.244444	0	0.0666667	NA	0	0.371429	0.0263158	0.0606061	0	0	NA	0	0	0
CGDMR	4354	Bd1-1	Bd1	35656100	35656399	299	hypo	0.018018	0.944444	1	1	0.0625	0	0	0	0.37037	0.5625	0.46875	0	0	0	0.0037037	0.00396825	0.00429184	0.008	0	0.00884956	0
CGDMR	4355	Bd1-1	Bd1	35670300	35670599	299	hypo	0	0.632812	0.916667	0	0	0	0	0.018018	0.492308	0.575	0.025	0	0	0	0.00208768	0.106719	0.0484429	0	0	0	0.00512821
CGDMR	4359	Bd1-1	Bd1	35761000	35761199	199	hypo	0	0.94186	0.930556	0	0.944882	0.833333	0.956989	0	0.551724	0.571429	NA	0.707317	0.444444	0.604938	0	0	0	0	0.0213523	0.00429184	0.0138122
CGDMR	4361	Bd1-1	Bd1	35840100	35841399	1299	hyper	0.972091	0.00570704	0.0117035	0.0094518	0.00475059	0.00703518	0.00743243	0.702871	0.0116999	0.00291971	0.00626305	0.0110599	0.00802407	0.00437956	0.0147487	0.00498504	0.0054902	0.00383142	0.00561482	0.00406033	0.00377042
CGDMR	4366	Bd1-1	Bd1	35896600	35897799	1199	hypo	0.0440967	0.967296	0.951498	0.914894	0.951351	0.965916	0.919099	0.025	0.687343	0.763485	0.698413	0.673496	0.731687	0.677862	0.00470747	0.0155591	0.018401	0.0132412	0.0115286	0.015808	0.0218777
CGDMR	4377	Bd1-1	Bd1	36019000	36019199	199	hypo	0	0.181818	0.884615	0.1	0.366667	0.48	0	0.037037	0.25	0.4	0.5	0	0.583333	0	0	0.020202	0.0947867	0.06	0	0.0131579	0
CGDMR	4380	Bd1-1	Bd1	36116600	36116799	199	hypo	0	0.047619	0.83871	0.578947	0.266667	0.741935	0.515152	0.0109489	0.0167598	0.0227273	0	0.0392157	0	0.0169492	0.00557103	0.00212766	0.00389105	0.016129	0	0.0106667	0
CGDMR	4394	Bd1-1	Bd1	36437300	36437599	299	hypo	0.0102041	0.95	1	0.882353	0.972477	0.920792	0.993333	0.0597015	0.465909	0.829146	0.2	0.68306	0.341772	0.562857	0.0178174	0.0154004	0.0291971	0	0.0398293	0.051458	0.0299278
CGDMR	4397	Bd1-1	Bd1	36524800	36525599	799	hypo	0.0497854	0.97632	0.984971	0.981969	0.976477	0.976488	0.00286533	0.0547264	0.652355	0.713295	0.716263	0.733818	0.415929	0.0108844	0.0251383	0.0199938	0.0141018	0.0156627	0.0132664	0.0261487	0.0442279
CGDMR	4398	Bd1-1	Bd1	36542000	36542699	699	hyper	0.943744	0.0577617	0.0594796	0.00985222	0.0744337	0.0858586	0.0950704	0.766816	0.0335968	0.03125	0.0212766	0.035461	0.0629371	0.047532	0.0107112	0.0116099	0.00863309	0.00988142	0.00388601	0.0127796	0.0146036
CGDMR	4415	Bd1-1	Bd1	37054400	37054999	599	hyper	0.976909	0.00328947	0	0.986765	0.00645161	0.00906344	0.00483092	0.708718	0.0136986	0.00995025	0.611807	0.0115741	0.0046729	0.0119048	0.0804919	0.00304878	0.00771208	0.0481651	0.00514139	0.00359281	0.00581395
CGDMR	4416	Bd1-1	Bd1	37124300	37124599	299	hyper	0.913043	0.00468384	0.00833333	0.00241546	0.0137615	0.0110803	0.0141343	0.638298	0.0248447	0	0	0.00662252	0	0.00409836	0.33	0	0	0	0.0189573	0	0.041791
CGDMR	4418	Bd1-1	Bd1	37124900	37125299	399	hyper	0.910798	0.178645	0.026178	0.0522648	0.0592593	0.164336	0.162752	0.708723	0.0144509	0	0.0291262	0.0188679	0.0215517	0.0128205	0.0146699	0.00631579	0	0.00411523	0.0058997	0.00398406	0.00363636
CGDMR	4420	Bd1-1	Bd1	37176500	37176699	199	hypo	0	0.254717	0.943396	0.871429	0.25	0.269231	0.423913	0.0277778	0.030303	0.108696	0.173913	0.0379747	0.0603448	0.0375	0.0208333	0.0327869	0.056338	0.0392157	0	0.0276243	0.0142857
CGDMR	4422	Bd1-1	Bd1	37185800	37186699	899	hyper	0.933967	0.0453479	0.0232558	0.97316	0.028632	0.00744879	0.0140845	0.654329	0.0128795	0.0185615	0.706877	0.0139949	0.00844391	0.00759219	0.0153686	0.0148033	0.00330396	0.0172159	0.00281373	0.00564016	0.00418799
CGDMR	4424	Bd1-1	Bd1	37257000	37257199	199	hyper	1	0	0	0.004329	0.00456621	0.00925926	0.0141844	0.826087	0.013245	0	0	0	0	0.027027	0	0.0174825	0.135135	0	0	0.017094	0
CGDMR	4437	Bd1-1	Bd1	37473500	37473799	299	hypo	0.00760456	0.942122	0.983607	0.979221	0.991453	0.943396	0.978622	0.0238095	0.555556	0.645963	0.920213	0.415966	0.167421	0.598726	0.00406504	0.0122807	0	0.0017331	0.00280112	0	0.00503145
CGDMR	4438	Bd1-1	Bd1	37484600	37485199	599	hypo	0.019802	0.977835	0.988024	0.0125	0.976599	0.966619	0.956456	0.0125261	0.468788	0.503268	0	0.595326	0.369591	0.517429	0.0135635	0.015025	0.0122449	0.00906344	0.0210773	0.0205011	0.00786838
CGDMR	4441	Bd1-1	Bd1	37494200	37494899	699	hyper	0.963107	0.095679	0.00519481	0.0150376	0.197901	0.0124481	0.02	0.392912	0.0040404	0.01	0.0295567	0.0161812	0.0111857	0.00200803	0.0242849	0.00537222	0.0103734	0.00782779	0.00637755	0.00369344	0.00643087
CGDMR	4446	Bd1-1	Bd1	37501900	37502099	199	hypo	0	0.971246	0.957746	0	0.724138	0.881057	0.983553	0.0277778	0.491228	0.225806	0	0.285714	0.344828	0.487179	0.0128205	0.0148515	0.018018	0	0.00657895	0.00545256	0.010566
CGDMR	4452	Bd1-1	Bd1	37543400	37543599	199	hypo	0	0.628571	0.957447	NA	0.979167	0.974359	0.969231	0.0294118	0.517401	0.780702	NA	0.426471	0.254658	0.544444	0	0.0126927	0.00597015	NA	0.0124481	0.0151515	0.0151229
CGDMR	4453	Bd1-1	Bd1	37546500	37546899	399	hypo	0.0373626	0.969231	0.984848	0	0.96875	0.898113	0.975124	0.018018	0.218447	0.625	0	0.522124	0.282895	0.37069	0.00821596	0.0107034	0	0	0	0.00727273	0.00719425
CGDMR	4454	Bd1-1	Bd1	37547000	37547899	899	hypo	0.0225108	0.951389	0.988655	0.00265252	0.962293	0.975213	0.969182	0.0444638	0.214469	0.410853	0.00515464	0.384409	0.152488	0.213901	0.0282486	0.00826045	0.00214592	0.00483092	0.00526932	0.00678593	0.00482897
CGDMR	4459	Bd1-1	Bd1	37658700	37659699	999	hypo	0.00764088	0.905588	0.986381	0	0.944634	0.839405	0.954784	0.0138122	0.220941	0.461111	0	0.538843	0.184498	0.58773	0.00689127	0.0033397	0.0115681	0.00236407	0.0147206	0.016558	0.0108096
CGDMR	4461	Bd1-1	Bd1	37662500	37662699	199	hypo	0	0.95122	0.914634	0.8	0.931937	0.918919	0.992063	0	0.22449	0.30303	0.6875	0.5	0.241379	0.216667	0.0175439	0	0.030303	0.0344828	0.0168067	0.00961539	0.00510204
CGDMR	4462	Bd1-1	Bd1	37663700	37663899	199	hypo	0.0947368	0.972973	1	0	0.916667	0.866142	0.95	0.0185185	0.0648148	0.0909091	0	0.0958904	0.0204082	0.0133333	0.014245	0.0026455	0	0	0.00393701	0.00571429	0
CGDMR	4464	Bd1-1	Bd1	37665200	37665399	199	hypo	0.00564972	0.968992	0.974026	0.25	1	1	0.966102	0	0.170732	0.242424	0	0.666667	0.0869565	0.277778	0.004329	0.00574713	0.0275229	0	0	0	0.0111111
CGDMR	4482	Bd1-1	Bd1	37922700	37922899	199	hypo	0.125	0.956522	0.9	NA	NA	0.833333	0.952381	0.142857	0.454545	0.4	NA	NA	0.666667	0.125	0	0.128713	0	NA	NA	0	0.0609756
CGDMR	4495	Bd1-1	Bd1	38249600	38249799	199	hyper	0.932432	0.823529	0.0645161	0.848485	0.928571	0.658537	0.767123	0.694915	0	0.0454545	0	0	0.03125	0	0.0123457	0.0115607	0	0.0206186	0	0.0162602	0
CGDMR	4497	Bd1-1	Bd1	38250600	38250799	199	hyper	0.943548	0.161616	0	0	0	0	0.0266667	0.65942	0.021978	0	0	0.0147059	0	0	0.01373	0	0	0	0.00483092	0	0.0114286
CGDMR	4498	Bd1-1	Bd1	38251000	38251299	299	hyper	0.984064	0.0483871	0	0	0	0	0	0.778846	0	0	0.00840336	0.0184049	0.00763359	0.00632911	0.00666667	0	0.0357143	0	0.00680272	0.0368098	0
CGDMR	4501	Bd1-1	Bd1	38266800	38266999	199	hyper	0.923913	0.684211	0	0	0	0	0.06	0.435644	0.0641026	0	0.08	0	0	0.04	0.0123457	0.0291971	0.0196078	0	0.0123457	0	0
CGDMR	4502	Bd1-1	Bd1	38280500	38280699	199	hypo	0	0.0434783	0.978723	0	0.0425532	0.00917431	0.0531915	0.0263158	0.0166667	0.0444444	0	0	0.0105263	0.010101	0.00428265	0.00458716	0	0.0136364	0	0.00257069	0.012285
CGDMR	4507	Bd1-1	Bd1	38369000	38369299	299	hypo	0.017341	0.976834	0.979452	0.157143	0.97048	0.0119048	0.00840336	0.0307018	0.507163	0.517073	0.057971	0.826816	0.0186916	0.0125786	0.011236	0.011065	0.00668151	0.032	0.00860585	0.0195122	0.00323625
CGDMR	4511	Bd1-1	Bd1	38403300	38403499	199	hypo	0.0222222	0	1	0.333333	0.1	0.2	0.304348	0.0111111	0.0123457	0.0384615	0.0444444	0	0.0410959	0.010101	0.0128755	0	0	0	0	0	0.00860215
CGDMR	4524	Bd1-1	Bd1	38541300	38541499	199	hypo	0.146067	0.884615	1	0.344828	0.6	0.84	0.550562	0.0181818	0.150538	0.238095	0	0	0.0638298	0.037037	0.00619835	0.0241692	0.0233645	0	0	0.0816327	0.00735294
CGDMR	4525	Bd1-1	Bd1	38548100	38548399	299	hypo	0.0120482	0.38764	0.986928	0.0232558	0.166667	0.0465116	0.198864	0.015873	0.09375	0.734568	0	0.0119048	0	0.0191083	0	0.0159744	0.0684932	0	0	0.00662252	0.029316
CGDMR	4526	Bd1-1	Bd1	38550300	38550899	599	hypo	0.0304094	0.959213	0.986111	0.00558659	0.954301	0.965879	0.961761	0.0134771	0.680215	0.709489	0.00943396	0.590909	0.590848	0.681459	0.0127728	0.0217072	0.0242571	0	0.0266492	0.0315131	0.0229829
CGDMR	4527	Bd1-1	Bd1	38625300	38626099	799	hypo	0.0100917	0.969265	0.982659	0.949761	0.967258	0.980163	0.971708	0.015814	0.0336134	0.0946746	0.0244444	0.0326975	0.0371622	0.0295015	0.00843418	0.00617829	0.00684931	0.00448833	0.00452489	0.008726	0.00374065
CGDMR	4533	Bd1-1	Bd1	38730500	38730699	199	hypo	0	0	0.982456	0.037037	0	0.0566038	0.0196078	0.0125	0.0625	0.25	0.272727	0	0.107527	0.0227273	0.0106383	0.0131579	0.0434783	0.0138889	0.0504587	0.106771	0.0163043
CGDMR	4535	Bd1-1	Bd1	38737100	38738299	1199	hyper	0.949486	0.0059556	0.00672269	0.960912	0.00547345	0.0123153	0.0141584	0.570862	0.00691563	0.00588235	0.701799	0.0280778	0.0191898	0.00541272	0.0138772	0.00849708	0.00957854	0.0131723	0.00715991	0.00364299	0.00176574
CGDMR	4537	Bd1-1	Bd1	38770300	38770499	199	hypo	0.047619	0.354839	1	0	0	0.0666667	0	0.0410959	0	0.0757576	0	0	0	0.0136986	0	0.00775194	0.00487805	0	0.00628931	0	0
CGDMR	4540	Bd1-1	Bd1	38801500	38801799	299	hypo	0.037702	0	0.907738	0.830882	0.885512	0.600791	0.00549451	0.0146819	0.0138568	0.270588	0.448	0.216856	0.13913	0.00543478	0.00451128	0.00704225	0.0449679	0.0294118	0.0529547	0.120219	0.00609756
CGDMR	4542	Bd1-1	Bd1	38804800	38805399	599	hypo	0.0226131	0.870598	0.95679	0.893275	0.00719425	0.90029	0.00662252	0.035503	0.687619	0.740654	0.879085	0.019943	0.783262	0.0266904	0.00963855	0.0415481	0.0230665	0.161585	0.0274314	0.0763747	0.031968
CGDMR	4545	Bd1-1	Bd1	38811300	38811499	199	hypo	0	0.925926	1	NA	0	1	1	0.05	0.333333	0.0714286	0	0.181818	0	0.333333	0	0.00701754	0.00625	0	0	0	0
CGDMR	4547	Bd1-1	Bd1	38828300	38828499	199	hypo	0.00803213	0.0155642	0.870968	0.0891089	0.221053	0	0.0113636	0	0.00342466	0.0206186	0	0.0136986	0	0.00431035	0.0119048	0.013468	0	0.0357143	0.0223881	0	0.0122951
CGDMR	4550	Bd1-1	Bd1	39157300	39157499	199	hyper	0.996296	0.978261	0.0357143	NA	0.964286	NA	0.957082	0.920308	0.70679	0.00900901	NA	0.766234	NA	0.908795	0.0194444	0.00947226	0.003663	NA	0.0123839	NA	0.0181564
CGDMR	4553	Bd1-1	Bd1	39224800	39224999	199	hyper	0.924731	0.00510204	0.0128205	0.941176	0.0289855	1	0.0242424	0.261438	0	0	0.828571	0	0.775	0	0.0338295	0.00207469	0.029703	0.0583942	0	0.0666667	0.00257732
CGDMR	4554	Bd1-1	Bd1	39248200	39248399	199	hyper	0.934579	0.222222	0	0	0.2625	0	0.945205	0.0135135	0	0.0666667	0	0	0	0	0.0105263	0	0	0	0	0	0.0104167
CGDMR	4563	Bd1-1	Bd1	39306400	39306699	299	hypo	0	0.931034	1	0.945946	1	0.932886	0.801802	0.0108696	0.373832	0.253333	0.5	0.268116	0.286765	0.13253	0.002849	0.00707547	0.00448431	0	0.0108696	0.0202952	0.0109489
CGDMR	4565	Bd1-1	Bd1	39319700	39319899	199	hypo	0.0625	0.466667	0.95	0	1	0.896552	0	0	0	0.384615	0	0	0.189189	0	0	0	0	0.03125	0	0	0
CGDMR	4567	Bd1-1	Bd1	39335800	39336299	499	hyper	0.931264	0.0185759	0.0170455	0	0.00421941	0.00666667	0.00357143	0.621818	0.00568182	0	0	0.0172414	0.0228571	0	0.0154291	0.00713267	0.01	0	0.0075188	0.00644122	0.010929
CGDMR	4572	Bd1-1	Bd1	39387200	39387699	499	hypo	0.038961	0.0660377	1	0	0	0	0.0147059	0.0304348	0.0242915	0.216216	0.0566038	0.1	0.0333333	0.0150376	0.0141509	0.00589391	0.00235571	0.0134228	0.00647948	0.0108108	0.00198807
CGDMR	4577	Bd1-1	Bd1	39412000	39412199	199	hypo	0.0181818	0	0.769231	0	0.588235	0	0.875	0.0120482	0	0	0	0.0120482	0.011236	0.0153846	0.012605	0.00578035	0.00534759	0	0.0123967	0.00696864	0.00273224
CGDMR	4588	Bd1-1	Bd1	39574200	39574499	299	hypo	0.117904	0.949519	0.886364	0	0	0.977723	0.119048	0.00401606	0.700581	0.442688	0	0.0117647	0.6736	0	0.0320988	0.0111408	0.0107643	0	0.00704225	0.0175953	0.0135135
CGDMR	4589	Bd1-1	Bd1	39580800	39581299	499	hypo	0.0145695	0.953202	0.970255	0.922929	0.965343	0.975	0.976543	0.0124777	0.645094	0.820433	0.763293	0.774597	0.737686	0.761398	0.00718133	0.00859599	0.00996377	0.00998668	0.00893744	0.0329807	0.0386905
CGDMR	4590	Bd1-1	Bd1	39582400	39582699	299	hypo	0.0350877	0.79646	0.966292	0.958333	0.972603	0.876106	0.139535	0.0049505	0.854922	0.745455	0.758621	0.873134	0.816568	0.0496454	0	0.0142653	0.0111732	0.0213415	0.0152284	0.011713	0.00907441
CGDMR	4593	Bd1-1	Bd1	39628300	39628699	399	hypo	0.0126183	0	0.994764	0	0.975207	0.98167	0.973274	0.0245399	0.0158228	0.734104	0	0.393443	0.594203	0.549346	0.0080402	0.00877193	0.0104257	0	0.00779377	0.0118577	0.0105263
CGDMR	4595	Bd1-1	Bd1	39629800	39629999	199	hypo	0.00675676	0.915888	1	0.747368	0.977099	0.93617	1	0	0.395833	0.0714286	0.0526316	0.428571	0.204545	0.0363636	0.004329	0.0136986	0.00645161	0.0192308	0.0111111	0.00790514	0.00847458
CGDMR	4596	Bd1-1	Bd1	39632600	39632799	199	hyper	1	0	0	0	0	0	0	0.319588	0.05	0	0	0	0	0	0.00664452	0	0	0	0.018018	0	0.0208333
CGDMR	4598	Bd1-1	Bd1	39637800	39637999	199	hypo	0.015873	1	1	1	0	0.955056	0	0.0295858	0.288462	0.211538	0.512195	0	0.263158	0	0.00283286	0.0149813	0	0.025641	0	0	0
CGDMR	4605	Bd1-1	Bd1	39773000	39773299	299	hyper	0.935039	0	0.112676	0.0224719	0.0169492	0	0.0258065	0.403694	0.0208333	0.0204082	0.0133333	0.00568182	0.0530973	0.015873	0.00488759	0	0.00952381	0.00578035	0	0.00425532	0.00738007
CGDMR	4614	Bd1-1	Bd1	39824700	39825099	399	hyper	0.944444	0.973913	0	0	0.924051	0.953125	0.946237	0.0833333	0.837838	0	0	0.666667	0.365854	0.0740741	0.0251397	0.00801603	0.00373134	0	0	0	0.0022779
CGDMR	4615	Bd1-1	Bd1	39825200	39825399	199	hyper	0.816667	0.9375	0	0.142857	0.785714	0.857143	0.555556	0.111111	0.545455	0	0	0.142857	0	0.0512821	0.00949367	0	0	0	0	0	0
CGDMR	4616	Bd1-1	Bd1	39839500	39839799	299	hypo	0.0447761	0.870588	0.988636	0.862245	0.993769	0.852941	0.971154	0.0714286	0.571429	0.597015	0.512195	0.666667	0.166667	0.475862	0.0196078	0.00547945	0.0122449	0.0143627	0.00857843	0.00666667	0.0041841
CGDMR	4621	Bd1-1	Bd1	39865200	39865399	199	hyper	0.822785	0.327273	0	0	0.0606061	0.938776	0.518519	0.038961	0.0144928	0	0	0	0.192982	0.0544218	0.008	0	0	0.111111	0.0131579	0.0078125	0.020202
CGDMR	4626	Bd1-1	Bd1	39927800	39927999	199	hypo	0	0.025	0.73913	NA	0	0	0	0	0.0357143	0.333333	NA	0	0.25	0	0.0163934	0	0.0714286	NA	0	0	0
CGDMR	4627	Bd1-1	Bd1	39936400	39936599	199	hypo	0.0357143	0.909091	1	0.933333	0	0.181818	0.961538	0.0327869	0.0512821	0.0869565	0	0	0.0227273	0.0384615	0.003125	0.00884956	0.00689655	0	0	0.00840336	0.00740741
CGDMR	4630	Bd1-1	Bd1	39990500	39990699	199	hypo	0.0147059	0.666667	1	0	0.883117	0.636364	0.807692	0.125	0.382353	0.4	0	0.448276	0.32	0.675676	0	0.0290698	0.075	0.0289855	0.122881	0.036036	0.0620155
CGDMR	4634	Bd1-1	Bd1	40012600	40012799	199	hypo	0.075	0.727273	0.928571	0.833333	1	0.9	0.37037	0.111111	0.842105	0.56	0.6	NA	0.666667	0.205128	0.021164	0.0897436	0.030303	0.307692	0.5	0.116279	0.112
CGDMR	4639	Bd1-1	Bd1	40066900	40067099	199	hypo	0	0.97619	0.92	1	0	0.717391	0.990385	0	0.769231	0.617647	0.5625	0	0.508772	0.8	0	0.0042735	0	0.030303	0	0.100295	0.00504202
CGDMR	4640	Bd1-1	Bd1	40067200	40067599	399	hypo	0.125	0.933702	1	0.84375	0	0.944882	0.966019	0.0466926	0.797015	0.730769	0.2	0.0392157	0.785714	0.684896	0.0109489	0.00848656	0.00877193	0.00775194	0	0.00509338	0.0186514
CGDMR	4645	Bd1-1	Bd1	40122500	40123299	799	hyper	0.973277	0.964912	0.00824742	0.976264	0.975962	0.964183	0.0111562	0.597183	0.691466	0.0115607	0.758294	0.733333	0.676829	0.00146843	0.192812	0.165158	0.0113636	0.0264026	0.0476974	0.213052	0.0075594
CGDMR	4658	Bd1-1	Bd1	40240500	40241099	599	hyper	0.935223	NA	0	NA	NA	NA	0.00931677	0.197044	NA	0.0165289	NA	NA	NA	0.0110193	0.00446144	NA	0.0100503	NA	NA	NA	0.00603015
CGDMR	4659	Bd1-1	Bd1	40241200	40241599	399	hyper	0.944175	0	0	0	0	0	0.0149254	0.273101	0.0357143	0	0	0	0	0	0.0113895	0	0.0035461	0	0	0	0.00734214
CGDMR	4660	Bd1-1	Bd1	40246300	40246499	199	hypo	0.152778	0.0666667	0.964286	NA	NA	0.375	0.533333	0.0746269	0	0.3	NA	NA	0.333333	0.225806	0.009375	0	0	NA	0	0	0.0217391
CGDMR	4662	Bd1-1	Bd1	40269400	40269799	399	hyper	0.978448	0	0	NA	0.037037	0.0408163	0.00662252	0.496	0	0.06	NA	0	0.0153846	0.0350877	0.00848896	0	0	NA	0.0149254	0	0
CGDMR	4663	Bd1-1	Bd1	40271300	40271699	399	hypo	0.0105263	0.724324	0.966154	0.784689	0.521327	0.639175	0.955007	0.00833333	0.494845	0.213953	0.544379	0.613636	0.432836	0.437768	0.00760456	0.037037	0.00674536	0.0177165	0.031348	0.0172414	0.0102848
CGDMR	4665	Bd1-1	Bd1	40278800	40278999	199	hyper	0.944444	0	0	NA	0	0	0	0.697674	0.0147059	0	NA	0	0	0	0.0190476	0	0.00934579	NA	0.0377358	0	0
CGDMR	4666	Bd1-1	Bd1	40279500	40279999	499	hyper	0.922945	0	0.0350877	0.248731	0.0131579	0.00571429	0	0.597614	0.00348432	0.0769231	0.292135	0.00816326	0.0266667	0.0262295	0.208406	0	0.165414	0.0969163	0.0184332	0	0.0464396
CGDMR	4670	Bd1-1	Bd1	40322800	40322999	199	hypo	0.0416667	0	0.904762	0	NA	0	0	0	0	0.0588235	0	0	0	0	0	0.00746269	0	0	0	0	0
CGDMR	4672	Bd1-1	Bd1	40336200	40336499	299	hypo	0.0148148	0.015625	0.99115	0	0.0176991	0	0.0273973	0.0149254	0.00900901	0.444444	0.0833333	0.107692	0.0126582	0	0.00420168	0.00609756	0	0	0.00817439	0	0.0136519
CGDMR	4678	Bd1-1	Bd1	40405500	40405999	499	hyper	0.841304	0.0171821	0.0140845	0	0.0441176	0.0458015	0.00917431	0.227882	0.00865801	0	0	0	0.0168067	0	0.021645	0.00565771	0.00968523	0.00956938	0.00255755	0.004914	0.00641026
CGDMR	4679	Bd1-1	Bd1	40406100	40406399	299	hyper	0.972396	0.0114286	0.00943396	0.0307692	0	0.00630915	0.012	0.612847	0.0209424	0.0308642	0.0173913	0.0149254	0.00813008	0.021097	0.0102564	0.0147992	0.00536193	0.0112676	0.0174129	0.00625	0.00814332
CGDMR	4680	Bd1-1	Bd1	40435600	40435799	199	hyper	0.930769	0.972222	0	1	0.757576	0.936709	0	0.552941	0.716216	0	0.333333	0.846154	0.833333	0	0.0207254	0.00854701	0	0	0	0.0104167	0.0106383
CGDMR	4682	Bd1-1	Bd1	40438800	40438999	199	hyper	0.920354	0.0545455	0	0	0.907692	0.945205	0	0.884058	0.0666667	0.333333	1	0.941176	0.875	0	0.00568182	0.0096463	0	0	0.0115274	0.00438597	0
CGDMR	4684	Bd1-1	Bd1	40463800	40463999	199	hyper	0.983333	0.735294	0	0.8	0	0.333333	0.625	0	0	0	0	0	0	0.0333333	0.00826446	0.00980392	0.0434783	0	0	0	0.0227273
CGDMR	4686	Bd1-1	Bd1	40480300	40481399	1099	hypo	0.0208198	0.965181	0.968375	0.974777	0.0315692	0.965968	0.949567	0.0249221	0.660261	0.705056	0.703777	0.00162075	0.719159	0.743644	0.00758903	0.0067597	0.0159176	0.00939948	0.00451671	0.00630517	0.00844746
CGDMR	4688	Bd1-1	Bd1	40484200	40484499	299	hypo	0.0117647	0.922509	0.97931	0.838509	0	0.995349	0.966814	0.00393701	0.823598	0.789203	0.878594	0.0106383	0.778249	0.80302	0.00466201	0.0152905	0.0201439	0.017663	0.00704225	0.0320814	0.026742
CGDMR	4690	Bd1-1	Bd1	40489100	40489399	299	hypo	0.0909091	0.942308	1	0	0.657895	0.769231	0	0.019802	0.359551	0.113208	0.333333	0.0540541	0.111111	0.02	0.00519481	0.010929	0.01	0	0.032	0.00442478	0
CGDMR	4694	Bd1-1	Bd1	40496100	40496299	199	hypo	0.0461538	0.985612	0.915094	0.0555556	0.03125	0.0804598	0.0204082	0.00699301	0.395833	0.172414	0.0714286	0	0	0.0263158	0	0	0.0347003	0	0	0.00340136	0
CGDMR	4702	Bd1-1	Bd1	40624300	40624699	399	hyper	0.967391	0.00649351	0.0179641	0.0103627	0.0194805	0.00952381	0.00671141	0.772936	0.00390625	0.00724638	0.0143885	0.0254237	0.0306748	0.0365854	0.0315856	0.0121131	0.00438597	0.00701754	0.00268096	0.00234192	0.00820793
CGDMR	4703	Bd1-1	Bd1	40624900	40625599	699	hypo	0.0252324	0.97189	0.985656	0.979798	0.978186	0.978562	0.981022	0.0226337	0.677288	0.740933	0.678955	0.635277	0.54726	0.691399	0.0277247	0.0218115	0.0220162	0.0139427	0.0166139	0.00954447	0.0219002
CGDMR	4704	Bd1-1	Bd1	40627600	40627799	199	hyper	0.851852	0.0208333	0	0	0	0	0.0169492	0.384615	0	0	0	0	0.0526316	0	0.0164835	0	0	0	0	0	0
CGDMR	4706	Bd1-1	Bd1	40665200	40665799	599	hyper	0.936526	0.00564972	0	0.973392	0.00438597	0.00793651	0.0125786	0.633208	0.00534759	0.0352941	0.843717	0.00431035	0.0125523	0.0117994	0.0112858	0.00693642	0.0108401	0.0170843	0.00198807	0.0056926	0.00578704
CGDMR	4709	Bd1-1	Bd1	40678900	40679099	199	hypo	0.0555556	0.6	1	0	NA	0	NA	0	0	0.307692	0	NA	0.0555556	NA	0.016129	0	0	0	0	0.038835	0
CGDMR	4713	Bd1-1	Bd1	40726900	40727399	499	hyper	0.963563	0.0547945	0.0327869	0	0.0338983	0	0	0.558952	0.00917431	0.0208333	0	0	0	0.032	0.00657174	0.00859599	0.00671141	0.0144928	0.0276498	0.011236	0.0117647
CGDMR	4714	Bd1-1	Bd1	40736500	40736799	299	hypo	0.04	0.976347	0.96633	0.969005	0.985808	0.9714	0.968153	0	0.631783	0.606383	0.67234	0.621262	0.572581	0.636628	0.04	0.195446	0.0188679	0.0410959	0.0201511	0.0742188	0.0452675
CGDMR	4718	Bd1-1	Bd1	40741100	40741299	199	hypo	0	0.576923	0.833333	1	0.892857	0.809524	0.776119	0	0.04	0.181818	NA	0.129032	0.217391	0.323077	0	0.00980392	0	0	0	0	0
CGDMR	4722	Bd1-1	Bd1	40807900	40808199	299	hyper	0.963333	0.00448431	0.0041841	0.0387097	0.00956938	0.015528	0.00287356	0.293706	0.00568182	0	0	0.012987	0	0	0.0083682	0	0	0.0204082	0	0	0.00454546
CGDMR	4729	Bd1-1	Bd1	40879200	40879399	199	hyper	0.886792	0	0	NA	0	0	0	0.0320513	0	0	NA	0	0.0232558	0	0.0154739	0.00588235	0.0243902	0	0	0	0
CGDMR	4735	Bd1-1	Bd1	40884800	40885099	299	hyper	0.945736	0.0891089	0	0.0588235	0	0	0.182927	0.01	0.0234742	0.0375	0.0119048	0	0.0149254	0.00574713	0.00438597	0.0132212	0.00315457	0.00934579	0.00849858	0.0123762	0.00330033
CGDMR	4736	Bd1-1	Bd1	40885200	40885399	199	hyper	0.978261	0.157895	0	NA	0.75	0.722222	0.0909091	0.0230769	0	0.0119048	NA	0	0.0204082	0.0166667	0.00328947	0	0	NA	0.0909091	0	0
CGDMR	4737	Bd1-1	Bd1	40885600	40885799	199	hyper	0.933333	0.0606061	0.0625	NA	0.5	0.0909091	0	0.0326087	0	0	0	0.0526316	0	0	0.00732601	0	0	0	0.0125	0.0144231	0
CGDMR	4739	Bd1-1	Bd1	40926900	40927899	999	hypo	0.0471976	0.0106464	0.984615	0.96336	0.975789	0.970569	0.965622	0.0439367	0.00344828	0.615854	0.617021	0.62562	0.573755	0.538835	0.0017094	0.00684151	0.0152116	0.0113636	0.0131056	0.00864553	0.0156887
CGDMR	4740	Bd1-1	Bd1	40928100	40928699	599	hyper	0.893831	0.826518	0	0.0364742	0.00588235	0	0.0325926	0.0203822	0.00825472	0.00429184	0.00671141	0.00643087	0.015873	0.0160819	0.00821114	0.00522952	0.003367	0.00700525	0.0148423	0.00490798	0.00666173
CGDMR	4741	Bd1-1	Bd1	40929100	40929299	199	hyper	0.913978	0.671429	0	0.5	0.727273	0.0869565	0	0	0.030303	0	0	0	0	0	0.012285	0.00682594	0	0	0.00719425	0	0.00724638
CGDMR	4742	Bd1-1	Bd1	40931100	40931499	399	hyper	0.9814	0.00591716	0.0792079	0	0	0.0157895	0	0.795122	0.00544959	0.0165289	0.03125	0	0.0135747	0.00506329	0.0124555	0.00564334	0.00990099	0	0.00858369	0.00575816	0.0167189
CGDMR	4743	Bd1-1	Bd1	40935500	40936299	799	hyper	0.952118	0.100103	0.0070028	0.0323292	0.0583529	0.0267131	0.0917782	0.831349	0.00884956	0.0110092	0.014556	0.00580913	0.0207469	0.0246154	0.0366197	0.00765864	0.0100251	0.0122449	0.00558036	0.0434227	0.00665188
CGDMR	4750	Bd1-1	Bd1	41020700	41020899	199	hypo	0	0.728972	0.826087	0.933333	0.897727	0.606667	0.79661	0.0133333	0	0	0.0555556	0.0075188	0	0	0	0	0	0.0350877	0.075	0.032	0.011236
CGDMR	4759	Bd1-1	Bd1	41043000	41043199	199	hyper	0.882353	0	0	NA	0	0.0454545	0.0277778	0.0408163	0	0.0416667	0	0	0.0434783	0.0169492	0.00357143	0	0	0	0	0	0
CGDMR	4761	Bd1-1	Bd1	41049100	41049399	299	hyper	0.961538	0	0	0	0	0	0	0.792115	0	0.0204082	0	0	0	0.037037	0.0120482	0	0	0	0.0147059	0.00763359	0
CGDMR	4764	Bd1-1	Bd1	41057400	41057599	199	hypo	0	0.951613	1	0	1	0.933333	0.934783	0.0454545	0.684211	0.48	0	0.888889	0	0.826923	0	0.00574713	0	0	0.0148515	0	0.00881057
CGDMR	4765	Bd1-1	Bd1	41058200	41058599	399	hypo	0.0322581	0.93985	0.975904	0.015625	0.984	0.953125	0.97479	0.0196078	0.727273	0.431818	0	0.904762	0.232558	0.676259	0.00440529	0.0109091	0.00888889	0	0.0233918	0.00588235	0
CGDMR	4766	Bd1-1	Bd1	41059100	41059299	199	hypo	0.0344828	0.963855	1	NA	0.90625	0.913043	0.962121	0.00961539	0.851675	0.898305	0	0.898734	0.291667	0.795455	0.011976	0.016	0	0	0.0137931	0.0183486	0
CGDMR	4770	Bd1-1	Bd1	41152800	41153399	599	hypo	0.0154639	0.975535	0.976798	0.0145695	0.973615	0.96665	0.979608	0.00909091	0.794727	0.789823	0.00881057	0.828999	0.782251	0.772546	0.00679117	0.0255232	0.0115741	0.00157978	0.0103884	0.0191919	0.0423963
CGDMR	4771	Bd1-1	Bd1	41158400	41159099	699	hyper	0.941048	0.0141844	0.012605	0.960559	0.0117146	0.0378378	0.0113636	0.502646	0.0213675	0.00362319	0.569423	0.0106383	0.0177866	0.00674536	0.024055	0.0230061	0.00518135	0.0106383	0.0110159	0.0140105	0.00544218
CGDMR	4780	Bd1-1	Bd1	41241400	41241799	399	hypo	0.00327869	0.954751	0.976261	0.809591	0.958153	0.94396	1	0.026936	0.636015	0.652174	0.571429	0.577123	0.704648	0.166667	0.00181818	0.00799361	0.0103093	0.00442804	0.00612089	0.00953592	0
CGDMR	4782	Bd1-1	Bd1	41260800	41260999	199	hypo	0	0.648148	0.928571	0	0.936364	0.968254	0.613333	0	0.0111111	0.315789	0.0169492	0.348416	0.0863309	0.221591	0	0.00224215	0.0106007	0.0234987	0.00417827	0.010917	0.0075643
CGDMR	4785	Bd1-1	Bd1	41266900	41267099	199	hypo	0	0.406977	0.861111	0.586207	0.301887	0.888889	0.359551	0	0.0566038	0.15625	0	0.0322581	0.583333	0	0	0.00578035	0.0103093	0.0294118	0.0285714	0.0324074	0.014218
CGDMR	4791	Bd1-1	Bd1	41292400	41292899	499	hypo	0.0120482	0.961078	0.948052	0.973154	0.962825	0.957661	0.959732	0.0106952	0.143631	0.0214286	0.0405405	0.0328947	0.0197694	0.0591304	0.00640569	0.016537	0.00390625	0	0.00719425	0.0124378	0.00672646
CGDMR	4792	Bd1-1	Bd1	41293600	41294399	799	hypo	0.0119454	0.969748	0.982716	0.963211	0.981506	0.973164	0.967604	0.0128411	0.71205	0.515837	0.0790378	0.787286	0.335476	0.785484	0.006035	0.0135585	0.0122137	0.00843373	0.0106166	0.0132388	0.0122549
CGDMR	4795	Bd1-1	Bd1	41337000	41337199	199	hypo	0.0204082	0.0344828	0.92	0.66	0.873563	0.858696	0.765957	0.0232558	0	0	0	0	0	0	0.0160643	0	0	0	0.0145985	0	0.00531915
CGDMR	4796	Bd1-1	Bd1	41339700	41339999	299	hyper	0.963824	0.958861	0	0.951087	0.926431	0.00763359	0.101382	0.36193	0.57967	0.010101	0.727074	0.532731	0.013986	0.0083682	0.018598	0.0120482	0.0379147	0.0066335	0.00644122	0.0108108	0.00609756
CGDMR	4797	Bd1-1	Bd1	41340100	41340399	299	hyper	0.950311	0.965468	0	1	0.979907	0.0393701	0.0191083	0.7	0.665319	0.0239521	0.844011	0.849632	0.0177515	0.00911162	0.0122087	0.00682594	0.008	0.0223776	0.00668151	0.00494234	0.0149254
CGDMR	4803	Bd1-1	Bd1	41370800	41371199	399	hypo	0.00413223	0.975933	0.981322	0.982375	0.972663	0.970376	0.960944	0.0232558	0.648208	0.677665	0.754687	0.691589	0.337382	0.364943	0.00705882	0.0131394	0.00618812	0.0120579	0.00542215	0.0093147	0.0223593
CGDMR	4808	Bd1-1	Bd1	41460700	41461599	899	hypo	0.0473988	0.0826667	0.951149	0.900405	0.922264	0.876982	0.89592	0.00591716	0.0111643	0.0269414	0.0276639	0.0134561	0.0135719	0.0297997	0.00460375	0.0061553	0.00915903	0.011509	0.00587988	0.00380373	0.00704225
CGDMR	4809	Bd1-1	Bd1	41486100	41486299	199	hyper	0.851515	0.195946	0	0	0	0	0	0.0049505	0	0.0487805	0	0	0	0.0113636	0.0277186	0	0	0	0	0.00934579	0.00775194
CGDMR	4810	Bd1-1	Bd1	41486500	41486699	199	hyper	0.885714	0	0	0.0322581	0.0357143	0	0.0277778	0	0.05	0	0	0.0243902	0	0	0.0113895	0.00277008	0	0.00704225	0.00401606	0	0
CGDMR	4813	Bd1-1	Bd1	41508100	41508299	199	hyper	0.75	0.761905	0	1	0.583333	0.75	0.848485	0	0	0.0416667	0	0	0.0909091	0.0144928	0.00473934	0.00704225	0.0119048	0	0.0289855	0.00884956	0.0106762
CGDMR	4814	Bd1-1	Bd1	41523100	41523399	299	hypo	0.0326087	0.0111111	0.894737	0.045045	0.0588235	0.878531	0.895238	0.0105263	0.00595238	0.612903	0	0.0344828	0.358255	0.269912	0	0	0.141026	0	0	0.0708661	0.0434783
CGDMR	4818	Bd1-1	Bd1	41572900	41573199	299	hyper	0.96	0.866953	0	0.1	0	0.149254	0.045045	0.569444	0.75	0	0	0.0487805	0	0.025	0	0.021164	0	0.0384615	0.00694444	0	0
CGDMR	4826	Bd1-1	Bd1	41602100	41602499	399	hypo	0.032	0.0186916	0.915789	0.730769	0.87037	0.150538	0.00847458	0.0171429	0.00892857	0.476744	0.461538	0.515152	0.0215054	0	0.00917431	0.00985222	0.0140187	0	0.0833333	0.0137931	0.010101
CGDMR	4833	Bd1-1	Bd1	41637200	41637399	199	hyper	0.796117	0.0107527	0.0212766	0.714286	1	0.96063	0	0.176471	0	0	0	0.269231	0.133333	0	0.0251256	0.00444444	0.00909091	0	0.0285714	0	0
CGDMR	4834	Bd1-1	Bd1	41638800	41638999	199	hypo	0	0	1	0.0526316	0.272727	0.485714	0.137931	0	0.0447761	0.697368	0	0	0.0428571	0.0384615	0	0	0.0169492	0.0104167	0	0.00378788	0
CGDMR	4840	Bd1-1	Bd1	41678900	41681999	3099	hyper	0.934883	0.123718	0.0079698	0.0269982	0.0784732	0.0128552	0.0137706	0.608946	0.0884122	0.0111695	0.0270575	0.0595506	0.00833635	0.0125224	0.0191898	0.0119511	0.00489876	0.00775675	0.0106101	0.00833333	0.00568793
CGDMR	4843	Bd1-1	Bd1	41690500	41690799	299	hyper	0.988235	0.00798403	0.0037594	0.02	0.00392157	0.00493421	0.0142096	0.629213	0	0.0140845	0.00947867	0.00361011	0.00877193	0	0	0.0121212	0.00598802	0	0.0114504	0	0
CGDMR	4844	Bd1-1	Bd1	41690900	41691399	499	hyper	0.923077	0.0582524	0.0114943	0	0.121212	0.031746	0.157576	0.743697	0	0.0111111	0	0	0	0.00671141	0.012931	0.00842697	0.00378788	0	0.030837	0.00465116	0.0157233
CGDMR	4847	Bd1-1	Bd1	41709200	41709599	399	hypo	0.0365854	0.959726	0.957958	0.971037	0.977752	0.97385	0.982979	0.0162162	0.581281	0.386207	0.489451	0.76435	0.70202	0.359517	0.0111857	0.00942126	0.00880282	0.00548697	0.0141844	0.00602928	0.00362319
CGDMR	4848	Bd1-1	Bd1	41723700	41723899	199	hypo	0	0.410959	1	0.421053	0	0.526316	0.103448	0	0.0322581	0.828571	0	0	0	0.208333	0.0125	0.00426439	0	0	0.0143885	0.0111732	0.0151515
CGDMR	4849	Bd1-1	Bd1	41747500	41747699	199	hypo	0	0.908163	0.958333	0	0	0	0	0	0.27027	0.366667	0	0	0	0	0.00675676	0.0183486	0	0.0222222	0	0.00763359	0.00877193
CGDMR	4850	Bd1-1	Bd1	41747800	41748099	299	hypo	0.0394737	0.0545455	0.903226	0.25	0	0	0.0263158	0.0963855	0.0555556	0.4375	0	0	0	0.111111	0.00875657	0.00566572	0	0.0444444	0	0	0.010929
CGDMR	4851	Bd1-1	Bd1	41748200	41748399	199	hypo	0	0	0.769231	0	0	0	0.0333333	0.0138889	0.0384615	0.0769231	0.1	0	0	0	0.00591716	0.00806452	0	0	0	0	0
CGDMR	4852	Bd1-1	Bd1	41766300	41766499	199	hyper	0.953488	0.0107527	0	0.849057	0.894737	0.94	0.990099	0.349515	0	0	0.771429	0.730769	0.684211	0.807018	0.0212766	0	0.0114943	0.00724638	0.03125	0.00486618	0.0058997
CGDMR	4853	Bd1-1	Bd1	41766700	41766899	199	hyper	0.959596	0.8	0.111111	0.866667	0.986842	1	0.956522	0.168831	0.05	0.0833333	0.2	0.504505	0.404762	0.5	0.00956938	0	0	0	0.0140187	0.00858369	0.00536193
CGDMR	4855	Bd1-1	Bd1	41792700	41792999	299	hypo	0	0.833333	1	1	1	0.904762	1	0	0.142857	0	0	0	0.0789474	0	0	0	0	0	0.0133333	0	0
CGDMR	4856	Bd1-1	Bd1	41793100	41793299	199	hypo	0	0	1	0.333333	1	0.25	0.8	0.117647	NA	0.0833333	0	0	0	0	0.0136986	0	0.0243902	0	0	0	0
CGDMR	4858	Bd1-1	Bd1	41798400	41798599	199	hyper	0.936508	0	0	0.611111	0	0.926471	0	0.03125	0.0144928	0	0	0	0.0421053	0	0.00689655	0.00900901	0.0147059	0	0	0	0.0070922
CGDMR	4859	Bd1-1	Bd1	41798700	41798899	199	hyper	0.986395	0.0133333	0	1	0	0	0	0.0116279	0	0	0	0	0	0	0.00974659	0.01	0	0.0149254	0	0.0130435	0.003663
CGDMR	4861	Bd1-1	Bd1	41799200	41799499	299	hyper	0.982143	0.011811	0.0111111	0	0	0.0140845	0	0.0497382	0	0	0	0.0125	0.00645161	0.021978	0.00798722	0.00341297	0.00568182	0.0136054	0	0.00906344	0.00342466
CGDMR	4862	Bd1-1	Bd1	41799900	41801399	1499	hyper	0.944144	0.0148588	0.0126582	0.888031	0.013089	0.0194647	0.00469484	0.523902	0.00666667	0.00865801	0.483425	0.00649351	0.00802139	0.0143627	0.0252708	0.00828729	0.0110132	0.00131926	0.00516351	0.00439883	0.00671704
CGDMR	4863	Bd1-1	Bd1	41809600	41809899	299	hyper	0.985646	0.346939	0	0	0.266667	0.0408163	0.337838	0.562963	0	0.0333333	0	0	0	0.125	0.00131234	0	0	0	0.030303	0.00934579	0
CGDMR	4864	Bd1-1	Bd1	41810000	41810199	199	hyper	0.992701	0.00543478	0.013986	0.00735294	0.0166667	0.00628931	0.00367647	0.186047	0.0177515	0.00740741	0.0181818	0	0	0.017316	0.00632911	0.0112903	0.00961539	0.00668896	0	0.00147275	0.00417246
CGDMR	4866	Bd1-1	Bd1	41810600	41810899	299	hyper	0.953947	0	0	0	0	0	0.0149254	0.208333	0	0	0	0.0232558	0.0517241	0	0	0.019802	0.00840336	0	0	0.00458716	0
CGDMR	4867	Bd1-1	Bd1	41811000	41811299	299	hyper	0.906593	0.173913	0	0.238095	0	0.15	0.0120482	0.0666667	0	0	0.0243902	0	0	0	0	0.0123457	0	0	0.0125	0	0
CGDMR	4868	Bd1-1	Bd1	41847400	41847799	399	hypo	0.0625	0.859712	0.905512	0.923333	0.902778	0.719512	0.87963	0.0188679	0.557143	0.641304	0.78392	0.61745	0.502825	0.644269	0.00823045	0.0119641	0	0.012464	0.015625	0.00240096	0.0153568
CGDMR	4869	Bd1-1	Bd1	41855700	41856299	599	hypo	0.0108108	0.981481	0.979253	0.994	0.970552	0.977119	0.961353	0.0190217	0.699695	0.550595	0.617647	0.741636	0.680535	0.550147	0.00362647	0.0137536	0.010846	0.00135685	0.00802139	0.02936	0.0134267
CGDMR	4872	Bd1-1	Bd1	41877300	41877599	299	hypo	0	0.972222	1	1	0.885714	0.952941	0.896552	0.0163934	0.84375	0.755102	0.75	0.863636	0.875	0.76699	0	0.0128411	0.0162602	0	0	0	0.0228571
CGDMR	4873	Bd1-1	Bd1	41878000	41878199	199	hypo	0.0163934	0.956835	1	0	0.994286	0.979592	0.0138889	0.013245	0.866667	0.941176	0	0.883621	0.90566	0	0.00340136	0.0116279	0.032967	0	0.00968523	0.00609756	0.012605
CGDMR	4875	Bd1-1	Bd1	41883000	41883199	199	hypo	0.115385	0.648352	0.9	0.518519	0.0847458	0.816092	0.698113	0.0446429	0.0247934	0	0.05	0	0.0163934	0.00763359	0.00780031	0.0237624	0.00578035	0.0172414	0.0108401	0.00869565	0.00848896
CGDMR	4877	Bd1-1	Bd1	41904400	41904699	299	hypo	0.0422535	0.0123967	0.960265	0.958084	0.0223464	0.0152439	0.00442478	0	0.0460829	0.387931	0.827309	0.00609756	0	0	0.030303	0.0483092	0.0888889	0.0362694	0.015625	0.0285714	0.0512821
CGDMR	4887	Bd1-1	Bd1	41946500	41946899	399	hyper	0.880208	0.005	0	0	0	0.00357143	0.00276243	0.509677	0.0160428	0	0	0.00699301	0.04	0	0.500835	0.00547945	0	0	0.0125523	0.00396825	0.00980392
CGDMR	4892	Bd1-1	Bd1	41996000	41996399	399	hyper	0.985185	0.0344828	0	0	0	0.0212766	0.00877193	0.609091	0.0144928	0	0	0	0	0	0.00694444	0.0179104	0.0102564	0.0289855	0.0111111	0	0
CGDMR	4900	Bd1-1	Bd1	42060900	42061099	199	hyper	1	0	0.1875	0	0.571429	0.545455	0.367347	0.875	0.0952381	0.125	0.5	0.222222	0.222222	0.25	0.0128205	0.00440529	0	0	0.0128205	0.0447761	0
CGDMR	4909	Bd1-1	Bd1	42161300	42161499	199	hypo	0.0196078	0.844444	0.903226	0.789474	0.935484	0.76	0.733333	0.011976	0	0.0119048	0.1	0.0126582	0.0597015	0.0365854	0.00754717	0.0130435	0	0.02	0	0.0217391	0
CGDMR	4913	Bd1-1	Bd1	42199500	42200399	899	hyper	0.939033	0.0071568	0.00413223	0.0288462	0.0195783	0.0159944	0.012747	0.737213	0.0153257	0	0.0572687	0.0223577	0.0122699	0.0153061	0.0514648	0.00579151	0.00280899	0.0090703	0.0116959	0.00803674	0.0222428
CGDMR	4914	Bd1-1	Bd1	42208900	42209399	499	hypo	0.0287356	0.955414	0.977778	0.980583	0.991667	0.974684	0.977578	0.0314961	0.785714	0.773333	0.580247	0.805825	0.785185	0.697368	0.0104058	0.0257092	0.0335968	0.0210084	0.0260078	0.019103	0.0173841
CGDMR	4916	Bd1-1	Bd1	42210900	42211399	499	hyper	0.943457	0.00369686	0	0.947977	0.00445104	0.00382409	0.00445765	0.142268	0.0124069	0	0.0764706	0.0245098	0	0.00203252	0.0102273	0.0178571	0.00787402	0.00647948	0.00562588	0.010929	0.00258398
CGDMR	4918	Bd1-1	Bd1	42223300	42223699	399	hypo	0.0409357	0.98	0.95082	0.985714	0.925234	0.965517	0.971698	0.0175439	0.438356	0.509804	0.484127	0.519231	0.46	0.633721	0.0112782	0.00865801	0	0.00357143	0.0128617	0.00308166	0.0063358
CGDMR	4921	Bd1-1	Bd1	42241300	42241499	199	hypo	0.0147059	0.892857	0.818182	0	0.875	0.361702	0.985915	0	0	0	0	0	0.0185185	0.0108696	0.00374532	0.0111111	0.00694444	0.0227273	0.0192308	0.0163043	0.00727273
CGDMR	4923	Bd1-1	Bd1	42262500	42262699	199	hyper	0.903226	1	0	0	0	0	0	0.0144928	0.02	0	0	0.0285714	0	0.00947867	0.00669643	0.00540541	0	0	0	0.00970874	0.0111111
CGDMR	4926	Bd1-1	Bd1	42296700	42297199	499	hyper	0.968227	0.0108696	0	0	0	0	0.027027	0.671733	0.0238095	0.0185185	0.571429	0.116279	0.131579	0.0515464	0.0195578	0.0103687	0.0155556	0.155172	0.0344828	0.0665399	0.0320733
CGDMR	4928	Bd1-1	Bd1	42322100	42322399	299	hyper	0.897196	0	0.0128205	0	0.0134228	0	0.0140845	0.196429	0.0212766	0.0204082	0.0731707	0.0333333	0.01	0	0	0	0	0	0.00293255	0	0.00617284
CGDMR	4929	Bd1-1	Bd1	42322500	42322699	199	hyper	0.892193	0.00771605	0.00641026	0.022508	0.0121622	0.00663717	0.00864553	0.256831	0.00477327	0	0.0309278	0.00429184	0.0164474	0.00925926	0.016129	0.00485437	0	0	0.00595238	0.00649351	0
CGDMR	4934	Bd1-1	Bd1	42350400	42350599	199	hypo	0.025641	1	1	1	1	1	0.953846	0.0111111	0.825581	0.838384	1	0.946809	0.82	0.76	0.00851064	0	0.008	0.0298507	0.0261194	0	0.00761421
CGDMR	4937	Bd1-1	Bd1	42357000	42357199	199	hypo	0	0.991935	1	0.714286	1	0.974359	0.943396	0	0.589147	0.137255	0	0.518072	0.205128	0.464516	0	0.00986842	0	0	0.0110497	0	0.0124378
CGDMR	4938	Bd1-1	Bd1	42357700	42357899	199	hypo	0	0.960317	0.96	0.904762	0.906977	0.93617	0.936842	0.0222222	0.886957	0.136364	0	0.265306	0.166667	0.0899471	0.0083682	0.0178862	0.0403226	0	0	0.00865801	0.00945627
CGDMR	4942	Bd1-1	Bd1	42359100	42359299	199	hypo	0.0217391	0.96319	1	0.943396	0.935829	0.923077	0.901042	0	0.12093	0.0533333	0.396396	0.393574	0.0858586	0.376426	0	0.00154799	0	0.00534759	0.0229746	0.00688468	0.0271084
CGDMR	4944	Bd1-1	Bd1	42361800	42362299	499	hyper	0.939024	0	0	0.440299	0	0	0.00896861	0.331034	0.0271739	0.013986	0.320574	0	0.0124224	0.0235294	0.0131446	0.0046729	0	0.0557377	0.0030581	0.00161812	0.0078637
CGDMR	4945	Bd1-1	Bd1	42362400	42362599	199	hyper	0.769231	0.0266667	0	0.915094	0.0166667	0	0	0.257576	0	0.0333333	0.575221	0.0168067	0	0	0.0729002	0	0.0574713	0.287234	0.01	0.00220264	0.00355872
CGDMR	4947	Bd1-1	Bd1	42367500	42367699	199	hyper	0.959184	0	0	0.225	0	0.0212766	0	0.808081	0	0.0416667	0.0862069	0	0.027027	0.0533333	0.0130797	0	0.0117647	0.00581395	0.00462963	0.0191388	0.0049505
CGDMR	4952	Bd1-1	Bd1	42406500	42406899	399	hypo	0.00531915	0.65272	0.935065	0.2	0.908046	0.869888	0.931298	0.0125	0.103825	0.15493	0.0166667	0.246032	0.168831	0.245763	0.0116429	0.0104712	0.00702576	0.0108303	0.0090703	0.00926879	0.000999001
CGDMR	4953	Bd1-1	Bd1	42408500	42408899	399	hypo	0.101796	0.877358	0.981308	0.5625	0.00917431	0.957983	0.908397	0.0333333	0.37931	0.333333	0	0.0416667	0.45625	0.261682	0	0.00512821	0.00977995	0.0162602	0.00992556	0.0164918	0.00669857
CGDMR	4957	Bd1-1	Bd1	42473200	42473399	199	hypo	0.0348837	0.968254	0.97931	1	0.985816	0.962818	0.936345	0.0294118	0.354962	0.593496	0.909091	0.489051	0.451685	0.524362	0.00621118	0.00578035	0	0.0487805	0	0.0109739	0.00696864
CGDMR	4958	Bd1-1	Bd1	42476700	42476999	299	hypo	0	0.554217	0.875	0.871795	0.777778	0.88	0.886179	0.0208333	0.0481928	0.466667	0.0645161	0	0.0769231	0.131783	0	0	0.027027	0.0117647	0	0	0.0196629
CGDMR	4960	Bd1-1	Bd1	42479800	42479999	199	hyper	0.977778	0	0.125	0.333333	0	0	0	0.00833333	0.0114943	0	0	0.0416667	0.040404	0.0210526	0.0034188	0.00961539	0	0	0.0384615	0	0
CGDMR	4961	Bd1-1	Bd1	42510600	42510999	399	hypo	0.00775194	0	0.901639	0.318182	0.542857	0.943182	0.877863	0	0	0.0540541	0	0.166667	0.0612245	0.131579	0	0.00921659	0.0197368	0	0.011236	0.0490566	0
CGDMR	4966	Bd1-1	Bd1	42517100	42517299	199	hypo	0.00947867	0.0178571	0.769231	0	0.435897	0.0215054	0	0.015625	0	0.16	0	0.0930233	0	0	0.013245	0.019802	0	0.0107527	0.00724638	0.00990099	0.00806452
CGDMR	4967	Bd1-1	Bd1	42524700	42524899	199	hypo	0.0505051	0.970238	0.958333	0	0.993671	0.945098	0.00584795	0.0198676	0.613333	0.192308	0	0.755102	0.298077	0.0223881	0.0208333	0.00594059	0.00892857	0.06	0.00542496	0.00787402	0.00738007
CGDMR	4968	Bd1-1	Bd1	42525100	42525299	199	hypo	0	0.953488	1	0	0.956522	1	0.958333	0.029703	0.579545	0	0	0.704545	0.0578512	0.207547	0	0.00655738	0	0	0.0100251	0.0217391	0.00306749
CGDMR	4978	Bd1-1	Bd1	42567400	42568199	799	hypo	0.00806452	0.00362319	0.961538	0.0166667	0.0228571	0.907738	0	0.0301508	0.0133333	0.366864	0	0.00606061	0.176471	0.0154639	0.0122137	0.00693481	0.00331126	0.00680272	0.00977995	0.00315789	0.0105541
CGDMR	4980	Bd1-1	Bd1	42568900	42569599	699	hyper	0.975888	0.00660793	0.00967742	0.00330033	0	0.016129	0.931398	0.242268	0.0164384	0.00384615	0.0188679	0.00952381	0.0119048	0.216718	0.0149626	0.0106383	0.0078125	0.00152207	0.00201613	0.00431655	0.00832033
CGDMR	4981	Bd1-1	Bd1	42586100	42586799	699	hyper	0.971014	0.0294118	0	0.0775194	0.015625	0.00470588	0.00319489	0.672593	0.011236	0.0159363	0.0107527	0.00884956	0.00621118	0.00973236	0.00796813	0.0106667	0.0112903	0.011236	0.0037037	0.00263852	0.005386
CGDMR	4983	Bd1-1	Bd1	42607000	42607299	299	hypo	0	0	1	0	0	0.971223	0	0.015625	0	0.444444	0	0	0.5	0	0.00480769	0.0280899	0.012	0	0	0.00792079	0.00561798
CGDMR	4986	Bd1-1	Bd1	42633900	42634499	599	hypo	0.00327869	0.95353	0.97973	0.977465	0.980519	0.980094	0.968341	0.0132626	0.725932	0.731544	0.807895	0.802105	0.698343	0.757075	0.00739958	0.00749064	0.00748503	0.0215569	0.0136319	0.015448	0.0164114
CGDMR	4987	Bd1-1	Bd1	42634900	42636799	1899	hypo	0.00877674	0.960038	0.978334	0.976228	0.968677	0.971422	0.973371	0.0140406	0.799798	0.813084	0.832989	0.74532	0.782318	0.809596	0.00450992	0.0224075	0.0127027	0.0179034	0.00924011	0.0157139	0.0154614
CGDMR	4988	Bd1-1	Bd1	42637000	42637399	399	hypo	0.047619	0.935065	1	0.978495	0.645161	0.953586	0.948553	0.0175439	0.946043	0.905512	0.918367	0.0344828	0.925532	0.941538	0.00746269	0.0121156	0.0104167	0.00765306	0.00884956	0.0101954	0.0135048
CGDMR	4994	Bd1-1	Bd1	42684900	42685099	199	hypo	0.0714286	0.611111	0.931034	0.111111	0.730769	0.311111	0.833333	0	0	0.0227273	0	0	0	0	0	0.0150376	0.0162602	0	0	0	0.00952381
CGDMR	4996	Bd1-1	Bd1	42690600	42690799	199	hyper	0.91453	0.871795	0	NA	0.636364	0	0.95	0.0104167	0.0229008	0	0	0	0.0277778	0.00555556	0.0121951	0.00771208	0.00740741	0	0.00546448	0.00641026	0.00857633
CGDMR	4999	Bd1-1	Bd1	42711000	42711199	199	hypo	0.0679612	0.616162	0.921875	0.504762	0.0909091	0.191781	0.648936	0.0175439	0.22	0.333333	0.0851064	0.122449	0	0.358491	0.0144231	0.0097561	0.0201342	0.0138249	0.0149254	0.00537634	0.0103627
CGDMR	5000	Bd1-1	Bd1	42714900	42715099	199	hyper	0.903704	0.932551	0	0	0	0	0	0.397015	0.302663	0	0	0.0107527	0	0	0.0182186	0.0484171	0	0	0	0	0.00943396
CGDMR	5001	Bd1-1	Bd1	42715700	42715899	199	hyper	0.925	0.0641026	0.037037	0.910714	0.983871	0	0.0131579	0.756522	0.0183486	0.02	0.687151	0.837736	0	0	0.0286344	0.0108696	0.0113208	0.00190476	0.00754148	0	0.00743494
CGDMR	5003	Bd1-1	Bd1	42717700	42718299	599	hyper	0.97619	0.005	0.0149254	0	0.0163934	0.008	0.0185185	0.698324	0	0	0.0238095	0	0.0326087	0.0230769	0.0254777	0.00621891	0	0	0.00814664	0.0150754	0.00150376
CGDMR	5008	Bd1-1	Bd1	42759900	42760099	199	hyper	0.945946	0	0	0	0.027027	0	0	0.25	0	0	NA	0	0	0	0	0.0223464	0	0	0.0134228	0.00588235	0
CGDMR	5012	Bd1-1	Bd1	42776000	42776399	399	hyper	0.843458	0.00749064	0	0	0.681818	0.0078125	0.688406	0.101266	0.00917431	0	0.0526316	0.0449438	0	0.041958	0.00562324	0.00330578	0.00766283	0.0173913	0	0.0108401	0.00230415
CGDMR	5013	Bd1-1	Bd1	42788400	42788599	199	hyper	0.982143	0.0746269	0.0333333	0.0169492	0.967391	0.146341	0.0895522	0.621212	0.108696	0.0377358	0.133333	0.837696	0.0428571	0.191489	0.0223124	0.020979	0.0263158	0.0512821	0.0121766	0.00578035	0.0212766
CGDMR	5014	Bd1-1	Bd1	42788700	42788899	199	hyper	0.966102	0.072	0.0136986	0.0526316	0.975904	0.0230769	0.0204082	0.681633	0.0571429	0	0.0465116	0.710744	0.020202	0	0.0152542	0.0255319	0.00598802	0	0.0120301	0.0223214	0
CGDMR	5017	Bd1-1	Bd1	42811500	42811999	499	hypo	0.00777202	0.740095	0.95203	0.0333333	0.91587	0.738431	0.833597	0.0208333	0.254042	0.456989	0	0.383202	0.265537	0.286682	0.0131772	0.028777	0.0685484	0	0.0409836	0.033195	0.0124378
CGDMR	5019	Bd1-1	Bd1	42819800	42820199	399	hypo	0.0909091	0.977099	1	0.976562	1	0.945312	0.958904	0.0265487	0.92233	0.929577	0.344444	0.875	0.5	0.846667	0.00207039	0.00819672	0.0122449	0.0141844	0.0092081	0.0212766	0.0484765
CGDMR	5020	Bd1-1	Bd1	42842500	42842699	199	hyper	0.84	0	0	NA	0	0	0.25	0.037037	0	0	NA	0	0	0	0	0.00925926	0	NA	0	0	0.0119048
CGDMR	5027	Bd1-1	Bd1	42920100	42920499	399	hypo	0.0137931	0.85	0.88172	0.1	0	0.84507	0.773006	0	0.41844	0.316456	0	0	0.183544	0.344371	0.0144033	0.0127273	0.0104167	0	0.0547945	0.0239808	0.00650759
CGDMR	5033	Bd1-1	Bd1	42938800	42938999	199	hyper	0.820144	0.0258065	0	0.0588235	0.04	0.0309278	0	0	0	0	0.047619	0.0104167	0	0	0.00297619	0.00498753	0	0	0.00687285	0.00458716	0.00387597
CGDMR	5036	Bd1-1	Bd1	42982400	42982799	399	hyper	0.923825	0.0118443	0	0.00389105	0.0275229	0.00383142	0.0137825	0.563591	0.003125	0.0185185	0	0.00769231	0.0060241	0.00511509	0.00900901	0.00636943	0.0124224	0.00649351	0	0.00497512	0.0108225
CGDMR	5037	Bd1-1	Bd1	42982900	42983299	399	hyper	0.9575	0.00830565	0.0548523	0.0185874	0.0440835	0.034749	0.0140845	0.651376	0.019305	0.013245	0.0075188	0.026178	0.0294118	0.00772201	0.0215686	0.0127932	0.00429184	0.0223214	0.00630915	0.00454546	0.00444444
CGDMR	5038	Bd1-1	Bd1	42988200	42988399	199	hypo	0	0.0194175	0.973333	0.0634921	0	0	0.0152672	0	0	0.5	0	0	0	0.0155039	0.0132013	0	0.017341	0.0152672	0.0588235	0	0.0120482
CGDMR	5041	Bd1-1	Bd1	43064900	43065099	199	hypo	0.0206186	1	1	0.952381	0.923077	0.651163	1	0.0245399	0.0614035	0.0338983	0.264706	0	0.0431655	0.00632911	0.00484261	0	0	0.0104167	0.00961539	0.00309597	0.0030581
CGDMR	5043	Bd1-1	Bd1	43065600	43065899	299	hypo	0.0207254	0.918288	0.9875	0.976378	0.917889	0.978495	0.996241	0.0258303	0.0727273	0.0721649	0.757353	0.0254545	0.0124688	0.0764873	0.0273632	0	0	0.00947867	0.00700525	0	0.00308166
CGDMR	5044	Bd1-1	Bd1	43066900	43067199	299	hypo	0.0368421	0.959538	1	1	0.965812	0.982301	0.933333	0.0313725	0.00740741	0.0141844	0.00613497	0.00518135	0.00609756	0.0175439	0.0046729	0.00192308	0.00826446	0	0.0268657	0.00550459	0
CGDMR	5049	Bd1-1	Bd1	43069600	43071699	2099	hypo	0.0148601	0.962572	0.977401	0.982979	0.981419	0.958736	0.964658	0.0124378	0.0367526	0.300119	0.589474	0.487192	0.123803	0.538012	0.004858	0.00547874	0.00791557	0.00791485	0.0112918	0.00906002	0.0156297
CGDMR	5055	Bd1-1	Bd1	43122200	43122399	199	hypo	0.0689655	0.722222	0.953846	1	0.875	0.982143	0.857143	0.0810811	0.461538	0.372093	0.777778	0.529412	0.461538	0.170213	0.018018	0.00921659	0	0.0909091	0	0.00380228	0.0103448
CGDMR	5058	Bd1-1	Bd1	43160300	43160499	199	hyper	0.984848	0	0.0285714	0	0	0	0	0.765432	0.0454545	0	0.0454545	0.0121951	0.0178571	0.04	0	0.0289017	0	0.010101	0.00632911	0	0
CGDMR	5059	Bd1-1	Bd1	43160600	43160799	199	hyper	0.940075	0.00980392	0.0128205	0.0114286	0	0.00636943	0.0162162	0.685446	0	0	0.00900901	0	0	0	0	0	0	0	0	0.00952381	0.0153061
CGDMR	5060	Bd1-1	Bd1	43160900	43161199	299	hyper	0.864769	0.00476191	0	0.0236967	0	0.0104987	0.00361011	0.811388	0	0	0.0126582	0.0110497	0.00322581	0.0128205	0.0482233	0.030303	0.0775862	0	0.0514286	0.013245	0
CGDMR	5064	Bd1-1	Bd1	43206500	43206799	299	hypo	0	0.995595	0.901961	0	0.964539	0.988095	0.0416667	0	0.745665	0.546296	0	0.805556	0.642857	0.111111	0	0.0121359	0.00675676	0	0.00787402	0.0215054	0.0625
CGDMR	5070	Bd1-1	Bd1	43261800	43261999	199	hypo	0.0166667	0.96875	0.980392	0.938356	1	1	0.964286	0.257576	0.873239	0.82	0.11215	0.822785	0.678161	0.742268	0.0741379	0.0139969	0.0425926	0.0310945	0.0253165	0.0320924	0.0129717
CGDMR	5071	Bd1-1	Bd1	43265800	43265999	199	hyper	0.98374	0.00862069	0	0	0	0.892308	0.0138889	0.287671	0.138158	0.196429	0.415094	0.141593	0.258065	0	0.0114286	0.0903955	0.207469	0.254296	0.104408	0.00687285	0.00241546
CGDMR	5073	Bd1-1	Bd1	43294500	43294699	199	hypo	0	0	1	0.923077	0	0.714286	0	0.012987	0.00943396	0.117647	0.0333333	0.0235294	0.0808081	0.0196078	0.0108303	0.0103448	0.264368	0.0898876	0.0150754	0.0445205	0
CGDMR	5075	Bd1-1	Bd1	43303100	43303599	499	hyper	0.962044	0.254302	0.0135135	0.0310559	0.211356	0.246032	0.263948	0.581911	0.0120968	0.008	0.0124224	0.0173611	0.0139665	0.0120192	0.0151274	0.00117096	0.00334448	0.00473934	0.00606061	0.0017301	0.00678426
CGDMR	5083	Bd1-1	Bd1	43380900	43381299	399	hypo	0.0271318	0.990888	0.979866	0	0.953795	0.974304	0.98081	0.00673401	0.874307	0.761658	0	0.855153	0.84029	0.89313	0.0143084	0.00819672	0.0142857	0	0.0128676	0.0101138	0.00820232
CGDMR	5087	Bd1-1	Bd1	43426900	43427099	199	hypo	0	0	0.761905	0.25	NA	0	0	0.0526316	0.166667	0.166667	0	NA	0	0	0	0	0	0	NA	0	0
CGDMR	5091	Bd1-1	Bd1	43490100	43490299	199	hypo	0.0689655	0.115385	0.793651	0.652174	0.62069	0.402597	0.963855	0	0	0.625	0.115385	0.488889	0.133333	0.831776	0.0134771	0.00518135	0.0151515	0.09375	0.0334262	0.0060241	0.0283912
CGDMR	5099	Bd1-1	Bd1	43587000	43587299	299	hyper	0.79	0	0	0	0.125	0	0	0.0309278	0	0	0	0	0	0	0.0467033	0	0.00555556	0	0	0.0136054	0
CGDMR	5105	Bd1-1	Bd1	43610100	43610299	199	hyper	0.882353	0.266667	0	1	0.846154	0.428571	0	0.0110497	0	0.0145985	0.0344828	0	0.0102041	0.00724638	0	0	0.00492611	0.0285714	0.0104167	0.00534759	0
CGDMR	5110	Bd1-1	Bd1	43638100	43638399	299	hyper	0.925234	0.0137615	0	0.974359	0.00452489	0.973333	0.914634	0.206422	0.0202703	0.0114943	0.62	0	0.694444	0.26	0.0162297	0.00852273	0.00854701	0.0493827	0	0.0344828	0.026087
CGDMR	5111	Bd1-1	Bd1	43645500	43645999	499	hypo	0.0511905	0.95622	0.986726	0.931655	0.968839	0.945473	0.957386	0.0365854	0.685927	0.675174	0.868	0.73755	0.598025	0.668966	0.0190141	0.0173108	0.0122075	0.0555556	0.010712	0.0402166	0.0241498
CGDMR	5115	Bd1-1	Bd1	43677300	43677499	199	hyper	0.952381	0.193548	0	0.181818	0.818182	0	0.9	0	0	0	0.0666667	0	0.0645161	0	0.00265957	0	0.00591716	0.0123457	0	0	0.00321543
CGDMR	5116	Bd1-1	Bd1	43689300	43689899	599	hypo	0.0104058	0.970698	0.980728	0.980031	0.972433	0.974603	0.964255	0.00912201	0.691527	0.698511	0.795247	0.793972	0.584746	0.696996	0.00999231	0.0114286	0.0190311	0.0235849	0.00828001	0.011276	0.0155409
CGDMR	5124	Bd1-1	Bd1	43739200	43739599	399	hyper	0.907895	0.897959	0	0.5	0.0769231	0.666667	0.666667	0.0165289	0.0144928	0	0	0	0.0555556	0	0.0132013	0.0102041	0.014218	0	0	0	0
CGDMR	5125	Bd1-1	Bd1	43783400	43783599	199	hypo	0.0232558	0.7	1	0	1	NA	0.777778	0.0222222	0.555556	0.7	0	0.357143	NA	0.111111	0.00684931	0.0163934	0	0	0	NA	0.0333333
CGDMR	5127	Bd1-1	Bd1	43810700	43810999	299	hypo	0.005291	0.00740741	0.986111	0	0.967033	0	0.00892857	0.0107527	0.00847458	0.901235	0	0.922727	0	0.0141844	0.0131004	0.0112782	0.0218978	0	0	0.0111111	0.0151515
CGDMR	5129	Bd1-1	Bd1	43825800	43825999	199	hyper	0.864151	0.964539	0	0	0	0.207207	0	0.284188	0.52973	0.010989	0.0408163	0	0.0879121	0.015544	0.0157859	0.00619195	0.00323625	0.00564972	0.00712589	0.0176282	0.00368324
CGDMR	5130	Bd1-1	Bd1	43826100	43826299	199	hyper	0.945455	0.964286	0	0	0	0.863095	0	0.441964	0.751111	0.0263158	0	0	0.319588	0.0277778	0.00677507	0.0129199	0.00869565	0.04	0.0357143	0.0183616	0
CGDMR	5133	Bd1-1	Bd1	43830600	43831499	899	hyper	0.953365	0.906459	0.010101	0.966372	0.0228426	0.942687	0.978138	0.295938	0.244332	0.0257511	0.412742	0.0148515	0.388258	0.226942	0.00924499	0.0172584	0.0313779	0.0141767	0.0231437	0.0165765	0.0140973
CGDMR	5135	Bd1-1	Bd1	43872700	43873499	799	hypo	0.030303	0.309859	0.941704	0.265918	0.968677	0.139881	0.0158046	0.0231839	0.224796	0.422311	0.222453	0.70922	0.0807339	0.0136054	0.0215934	0.0150987	0.00792079	0.028866	0.0272053	0.0145379	0.0158103
CGDMR	5144	Bd1-1	Bd1	43965200	43965599	399	hypo	0.00694444	0.969631	0.975	0	0.970464	0.944162	0.0545455	0.00787402	0.87395	0.84	0.0625	0.752969	0.8	0.0956938	0.00628931	0.0188071	0.0075188	0	0.0128795	0.0114855	0.0117474
CGDMR	5155	Bd1-1	Bd1	44057700	44058599	899	hyper	0.964835	0.953155	0.00401606	0.08	0.97146	0.965107	0	0.687386	0.756367	0	0.0168067	0.703956	0.762127	0.00248139	0.023525	0.0125833	0.00505051	0.0362319	0.0160622	0.0211416	0.00945946
CGDMR	5156	Bd1-1	Bd1	44060600	44060799	199	hyper	0.813953	0.888889	0	0	0	0	0.222222	0.0222222	0.02	0	0	0	0.00826446	0.0189873	0.00645161	0.00653595	0.00628931	0	0.00628931	0.00209644	0.00436681
CGDMR	5162	Bd1-1	Bd1	44140700	44141099	399	hyper	0.860262	0.966667	0.021978	0.947368	0.194245	0.976331	0.96371	0.0229358	0.0733333	0	0.102041	0	0.0309278	0.0454545	0.00130719	0.00664452	0	0.0140845	0	0.00234192	0.00147275
CGDMR	5165	Bd1-1	Bd1	44181800	44182099	299	hypo	0	0.944444	1	0	1	0.678571	0.954545	0.00694444	0.830116	0.764706	0.0384615	0.776567	0.125	0.689498	0.0049505	0.0150215	0.0111359	0.0416667	0.00408163	0	0.00392157
CGDMR	5172	Bd1-1	Bd1	44229600	44229799	199	hyper	0.751196	0.0103806	0.0197368	0.00574713	0.0263158	0.0150943	0.984043	0	0.0106383	0.0185185	0	0.0114943	0	0.0204918	0.00545454	0.00537634	0.00411523	0.00483092	0.00874636	0.00890208	0.00395257
CGDMR	5177	Bd1-1	Bd1	44270800	44270999	199	hypo	0	0.538462	0.944444	NA	1	1	0	0	0	0.357143	NA	0	0.833333	0	0.01	0	0	NA	0.0192308	0.031746	0
CGDMR	5180	Bd1-1	Bd1	44311100	44311299	199	hyper	0.878505	0	0	0	0	0.105263	0	0.00555556	0	0	0	0	0.0277778	0	0.0016129	0	0	0	0	0	0.00970874
CGDMR	5182	Bd1-1	Bd1	44313700	44313899	199	hypo	0.0526316	0.568627	0.933333	0	0.818182	0	0.075	0	0	0.136364	0	0.125	0.111111	0.0526316	0.00214592	0.0037037	0.00448431	0	0.0224719	0	0.0144928
CGDMR	5186	Bd1-1	Bd1	44400400	44400599	199	hypo	0.011236	0.828125	0.90625	1	0.912281	0.857143	0.888889	0.0392157	0.235294	0.478261	0.6	0.604651	0.0697674	0.269231	0	0	0.0263158	0	0.047619	0.0431655	0.0060241
CGDMR	5188	Bd1-1	Bd1	44430300	44430799	499	hyper	0.964953	0.957207	0.0114943	0	0.775701	0.0145985	0	0.0909091	0.386207	0	0	0.354582	0	0	0.0173979	0.00634921	0.0110294	0	0.00477327	0.00283286	0.0165138
CGDMR	5195	Bd1-1	Bd1	44658100	44658299	199	hypo	0.0826446	0.924051	0.928571	0	0	0	0	0	0.27	0.338983	0.0138889	0.00943396	0.00961539	0	0.010084	0.0397878	0.0157068	0.021978	0.0077821	0.0185759	0.0185759
CGDMR	5196	Bd1-1	Bd1	44665400	44665599	199	hypo	0.0327869	0.571429	0.928571	1	0.1	0.533333	0.756098	0.0869565	0.423077	0.583333	0.25	0.363636	0.3	0.35	0.0137615	0	0.0192308	0.121212	0	0.0338983	0.0583333
CGDMR	5197	Bd1-1	Bd1	44670800	44671499	699	hyper	0.942574	0.0115607	0	0	0.0253165	0	0.011194	0.430612	0.0078125	0.0111111	0.115385	0.010989	0	0.00487805	0.0180563	0.00521376	0	0	0.00359066	0.00860215	0.00242131
CGDMR	5207	Bd1-1	Bd1	44906500	44906999	499	hypo	0.019802	0.875486	0.979798	0.992268	0.963526	0.966443	0.0678733	0.0303867	0.247031	0.821622	0.64898	0.582609	0.682222	0.052356	0.0221987	0.0240838	0.0206897	0.0172414	0.0435606	0.0296571	0.130435
CGDMR	5209	Bd1-1	Bd1	44967100	44967299	199	hypo	0.00512821	0.0103093	0.956522	0.011236	0.980769	0.0208333	0.96129	0.025641	0.0588235	0.275862	0	0.333333	0.0434783	0.447368	0.0174216	0.0134228	0.0273973	0.025	0	0.0948905	0.0025
CGDMR	5210	Bd1-1	Bd1	44967400	44967599	199	hypo	0	0.181818	1	0	0	0	0.898734	0	0.5	1	0	NA	NA	0.358491	0.027027	0.0166667	0	0.03125	0	0.0263158	0.03663
CGDMR	5214	Bd1-1	Bd1	45030700	45031499	799	hypo	0.00481928	0.908669	0.977679	0.169492	0.955882	0.936378	0.96063	0.0103093	0.471154	0.669468	0.0384615	0.594235	0.536122	0.57	0.00665188	0.0123278	0.0103676	0.00518135	0.0127796	0.0124481	0.00995316
CGDMR	5215	Bd1-1	Bd1	45032900	45033199	299	hypo	0.0104167	0.894934	0.980583	0.972308	0.866667	0.868472	0.867497	0	0.653153	0.455319	0.51269	0.455621	0.549618	0.621891	0.00278552	0.00857633	0.0157303	0.0514286	0.0373832	0.0338409	0.0376016
CGDMR	5228	Bd1-1	Bd1	45155600	45155799	199	hypo	0.0791367	0.169014	1	0.173913	0.894737	0.0217391	0.169643	0	0.166667	0.586207	0.0882353	0.641791	0	0.0490196	0.010989	0.0186335	0	0.0588235	0.0149254	0.0178571	0.0163399
CGDMR	5230	Bd1-1	Bd1	45173600	45174099	499	hypo	0.00346021	0.92233	0.984496	0.952607	0.968116	0.958333	0.954451	0.0182482	0.00428265	0.0314961	0.0223881	0.0133333	0.0196629	0.0174216	0.00767754	0.0123457	0	0.00584795	0.010989	0.00733496	0.00972763
CGDMR	5234	Bd1-1	Bd1	45224600	45224999	399	hyper	0.955782	0	0.056338	0.692308	0	0.179775	0.0145985	0.641791	0.0204082	0.0142857	0.189873	0	0.0581395	0.00675676	0.014377	0.0040568	0.00373134	0.0138122	0	0.00707965	0.00900901
CGDMR	5238	Bd1-1	Bd1	45243400	45243599	199	hypo	0.0217391	0.934426	1	1	0.938462	0.921053	0.973684	0.0277778	0.283019	0.75	0.326087	0.2	0.35	0.396226	0	0.0211864	0	0	0.00990099	0.00803213	0.0413223
CGDMR	5242	Bd1-1	Bd1	45275900	45277199	1299	hypo	0.0104857	0.949534	0.977778	0.960187	0.977702	0.972945	0.974722	0.0121083	0.654921	0.69496	0.754417	0.710393	0.662791	0.711968	0.00761773	0.0471056	0.028786	0.067029	0.0248334	0.0581186	0.0855416
CGDMR	5249	Bd1-1	Bd1	45323000	45323199	199	hyper	0.932927	0.00847458	0.04	0	0.0212766	0	0.0375587	0.0610329	0.00828729	0.00793651	0.0102041	0.0049505	0.037037	0.00621118	0.00990099	0.00328947	0.00892857	0	0	0	0.00732601
CGDMR	5250	Bd1-1	Bd1	45323300	45323499	199	hyper	0.967742	0.0731707	0.2	0.333333	0.166667	0	0	0.0144928	0.0697674	0	0	0	0	0	0	0	0.0224719	0	0	0	0.00531915
CGDMR	5252	Bd1-1	Bd1	45336700	45337699	999	hypo	0.0468498	0.963037	0.981481	0.977128	0.95642	0.967181	0.967583	0.0251678	0.610444	0.632373	0.742888	0.681507	0.552812	0.599245	0.00938086	0.00799744	0.028607	0.0101911	0.011333	0.0265487	0.0190233
CGDMR	5253	Bd1-1	Bd1	45341300	45342199	899	hypo	0.0151324	0.961377	0.977606	0.91451	0.9092	0.960904	0.900875	0.0130785	0.52337	0.443864	0.5	0.419412	0.198336	0.207719	0.00914077	0.00782779	0.075407	0.00965825	0.00978109	0.0240265	0.00706402
CGDMR	5255	Bd1-1	Bd1	45351100	45351299	199	hypo	0	0.772727	0.931818	0.975	0.894231	0.967213	0.0212766	0	0.525	0.414634	0.586207	0.464286	0.368421	0	0	0.0218579	0.0105263	0.0271493	0.0265487	0.0191571	0.014218
CGDMR	5258	Bd1-1	Bd1	45368000	45368199	199	hyper	0.934783	0	0	NA	0	0	0.333333	0	0	0	NA	0	0	0	0.0154525	0	0	NA	0	0	0
CGDMR	5268	Bd1-1	Bd1	45446300	45446499	199	hypo	0.0365854	0.0206897	0.973684	0.0540541	0.0454545	0.0272109	0.034188	0.027972	0.0384615	0.8	0	0	0	0.0070922	0.00288184	0.00189394	0.0110497	0	0	0.00982801	0
CGDMR	5271	Bd1-1	Bd1	45461700	45462199	499	hyper	0.820717	0.0223881	0.0163934	0.232558	0	0.0273973	0.0526316	0.0273973	0.0049505	0	0	0.0689655	0	0	0.0110032	0.00387097	0.00492611	0.00323625	0	0.0123023	0.00475059
CGDMR	5273	Bd1-1	Bd1	45486300	45486899	599	hypo	0.0017762	0.958817	0.972513	0.981308	0.981456	0.969173	0.971412	0.0160428	0.602506	0.707022	0.754934	0.514963	0.758858	0.736145	0.00455235	0.0115364	0.011324	0.0109589	0.014791	0.0112745	0.00520156
CGDMR	5285	Bd1-1	Bd1	45553500	45553999	499	hyper	0.965106	0.00153374	0	0	0.00534759	0.0106952	0.010101	0.598583	0.00414938	0	0.0245902	0.0130719	0.010989	0.0175824	0.0113583	0.00626305	0.00729927	0.00925926	0.00362319	0.00183486	0.00777778
CGDMR	5289	Bd1-1	Bd1	45578600	45578899	299	hyper	0.971963	0.011976	0	1	0	0.831832	0.969626	0.702194	0.0185185	0.0222222	0.958042	0	0.742915	0.781411	0.0373626	0.00751073	0.0159744	0.0144144	0.00630915	0.0708833	0.0391115
CGDMR	5290	Bd1-1	Bd1	45579300	45579499	199	hyper	0.988506	0	0	1	0.354839	0.983607	1	0.875	0	0	1	0.375	1	0.666667	0.0183246	0	0	0.0240964	0.0172414	0.0173611	0.0367647
CGDMR	5293	Bd1-1	Bd1	45624300	45624499	199	hyper	0.857143	0.758621	0	NA	NA	0	0.166667	0.0888889	0.0144928	0	NA	0	0	0	0.0115942	0.021164	0.04	0.142857	0.111111	0.0434783	0.00917431
CGDMR	5299	Bd1-1	Bd1	45689300	45689599	299	hyper	0.922034	0.889344	0.012987	0.639344	0.918699	0.315476	0.724771	0.016835	0.0143369	0	0	0.00546448	0.0172414	0.00858369	0.009908	0.00364299	0.00533333	0.0115274	0.00694444	0.0097629	0.00379147
CGDMR	5302	Bd1-1	Bd1	45737300	45737499	199	hypo	0	0.959596	1	1	0	1	0.9375	0	0.232877	0.516129	0	0	0.375	0.151515	0.00877193	0.0178042	0.117117	0	0	0.0078125	0.0697674
CGDMR	5308	Bd1-1	Bd1	45810900	45811399	499	hypo	0.0317797	0.858879	0.945679	0.82732	0.862179	0.818705	0.951004	0.0176991	0.330524	0.431818	0.306069	0.357019	0.266573	0.495192	0.00576132	0.00523982	0.0129032	0.00498132	0.00752394	0.0078455	0.00647878
CGDMR	5309	Bd1-1	Bd1	45816000	45816199	199	hypo	0.00833333	0	0.776923	0	0	0.108911	0.0384615	0.0111111	0	0.409524	0	0	0.0506329	0	0.00966184	0.00473934	0.0132743	0	0.0222222	0.0229885	0
CGDMR	5320	Bd1-1	Bd1	46078400	46078599	199	hyper	0.947368	0	0	0	0	0	NA	0.497268	0.0163934	0	0	0	0	NA	0.014975	0	0	0	0	0	NA
CGDMR	5322	Bd1-1	Bd1	46079200	46079499	299	hyper	0.989247	0	0	NA	0.2	NA	0.0625	0.129187	0	0	NA	0.133333	0	0	0.00773994	0	0	NA	0	0	0
CGDMR	5323	Bd1-1	Bd1	46079800	46079999	199	hyper	0.981481	0	0.0344828	0	0	NA	1	0.111111	0	0	0	0	NA	0	0.00303951	0	0.0103093	0	0	NA	0.0769231
CGDMR	5324	Bd1-1	Bd1	46080200	46080499	299	hyper	0.992	0	0	0	0.825	0.461538	0	0.176829	0	0	0	0.170213	0	0	0.00420168	0	0.00862069	0	0	0	0
CGDMR	5325	Bd1-1	Bd1	46080700	46080899	199	hyper	0.987952	0	0	0	0	0	0	0.205882	NA	0	0	0	0	NA	0.00251889	0	0.011236	0	0	0	0.0666667
CGDMR	5327	Bd1-1	Bd1	46085500	46085699	199	hyper	0.966981	0	0	0.962406	0.914286	0.991736	0.982301	0.59633	0.0119522	0.027027	0.793011	0.79403	0.428571	0.618123	0.0389344	0.00458716	0.00393701	0.0175439	0.0143149	0.0222222	0.00408998
CGDMR	5328	Bd1-1	Bd1	46087600	46087799	199	hypo	0	NA	1	NA	NA	NA	NA	0.0416667	NA	0.777778	NA	NA	NA	NA	0	NA	0	NA	NA	NA	NA
CGDMR	5330	Bd1-1	Bd1	46089500	46090099	599	hypo	0	0	1	0	0	0	0.0232558	0.00833333	0	0.833333	0	0	0	0	0.00790068	0.00566572	0.0101781	0	0.00588235	0	0
CGDMR	5331	Bd1-1	Bd1	46090200	46090499	299	hypo	0	0	1	0	NA	0	0	0	0	0.875	0	NA	0.03125	0	0.00287356	0.00970874	0.0108696	0	NA	0.00561798	0
CGDMR	5333	Bd1-1	Bd1	46093600	46093999	399	hyper	0.961039	0.110379	0.141126	0.333333	0.375	0.229196	0.34212	0.703571	0.0865847	0.120996	0.263584	0.257862	0.0825008	0.1557	0.0165837	0.0141947	0.0542797	0.163677	0.0608108	0.0124758	0.0283409
CGDMR	5335	Bd1-1	Bd1	46104200	46104499	299	hypo	0.0246914	0	1	0	0.766667	0.551724	0.0285714	0.102804	0.0153846	0.0980392	0	0	0.03125	0	0.0202899	0.012987	0	0	0.004329	0.0140845	0.00617284
CGDMR	5339	Bd1-1	Bd1	46109200	46109499	299	hyper	0.945355	0	0.0263158	0	0	0	0.219512	0.521739	0.0133333	0.0232558	0.0555556	0	0.0869565	0	0.0097493	0.0171674	0	0.012987	0	0.0121212	0.00775194
CGDMR	5340	Bd1-1	Bd1	46135600	46135899	299	hyper	0.973333	0.00966184	0	0	0	0	0	0.594828	0.0190476	0	0	0.0909091	0.01	0	0.0156454	0.003125	0	0	0	0.00292398	0.0124224
CGDMR	5343	Bd1-1	Bd1	46203800	46203999	199	hyper	0.835052	0.757576	0	1	0.42029	0.72	0.0266667	0	0.0114943	0	0	0.0285714	0.0176991	0.0106383	0.00823723	0.00458716	0	0.0159363	0.00511509	0.0153846	0.00619195
CGDMR	5348	Bd1-1	Bd1	46223300	46223499	199	hypo	0	0.111111	0.920635	0	0.813187	0.011236	0.0336134	0.08	0.00568182	0.525641	0.0588235	0.515464	0.012987	0.05	0.00292398	0	0	0	0.0208333	0.0238095	0
CGDMR	5349	Bd1-1	Bd1	46227500	46227699	199	hypo	0.00970874	0	0.962264	0	0.347826	0.171429	0	0	0.025	0.491228	0	0	0.0666667	0	0.0141243	0	0.0478469	0	0.0123762	0.0488889	0.00641026
CGDMR	5350	Bd1-1	Bd1	46242200	46242399	199	hypo	0	0.031746	0.934066	0.025	0	0.0746269	0.883657	0.0176991	0.0245902	0.486239	0	0	0.0363636	0.400576	0.0103093	0.00193798	0.0148976	0.0075188	0.015625	0.00615385	0.0236559
CGDMR	5360	Bd1-1	Bd1	46369400	46369699	299	hyper	0.939252	0.953883	0.0549451	1	0.974555	0.961538	0.966667	0.084507	0.493088	0.0392157	0.294118	0.684729	0.567164	0.441558	0.0182055	0.0191518	0.0231214	0	0.0205237	0.0354223	0.0116054
CGDMR	5362	Bd1-1	Bd1	46398100	46398399	299	hyper	0.83871	0.00543478	0	0.5	0.012987	0.0642202	0	0.0164948	0.00733496	0	0.027027	0.0186335	0	0.0046729	0.00389105	0.00476191	0.00429184	0.0149254	0.00403226	0	0.00470219
CGDMR	5370	Bd1-1	Bd1	46482700	46482899	199	hypo	0.105263	0.9	0.833333	NA	0.4	0.555556	0.75	0.105263	0.666667	0.3	NA	0.25	0	0.5	0	0	0.020202	NA	0	0.0298507	0
CGDMR	5373	Bd1-1	Bd1	46494800	46494999	199	hypo	0	0.878049	0.894737	0	0.72093	0.0909091	0.0909091	0.0315789	0.0357143	0.0140845	0.117647	0.0194805	0.111111	0.0921053	0.0145773	0.00254453	0.00537634	0.0306122	0.00682594	0.0128205	0.0310559
CGDMR	5377	Bd1-1	Bd1	46502500	46502699	199	hypo	0.0299401	0	0.828947	0	0	0.03125	0.00900901	0	0.0125	0.615385	0.0425532	0.0454545	0	0.0285714	0.0166667	0.00515464	0.0253968	0.0238095	0	0.00840336	0.0083682
CGDMR	5379	Bd1-1	Bd1	46512800	46513099	299	hypo	0.0409836	0.0277778	1	0	0	0	0	0.0765027	0	0.728814	0	0	0.0175439	0	0.00701754	0	0.0186047	0	0	0.020202	0.0116279
CGDMR	5380	Bd1-1	Bd1	46524900	46525499	599	hyper	0.932203	0.936061	0	0.0130719	0.85342	0.00378788	0.0131004	0.428571	0.405229	0.0326087	0.0721649	0.0803571	0.0223464	0.0197368	0.019084	0.00784929	0.00483092	0.00638978	0.00340715	0	0.0104712
CGDMR	5394	Bd1-1	Bd1	46617600	46617799	199	hyper	0.962025	0.851852	0	0.666667	0.954545	0.864865	0.819672	0.0212766	0.00641026	0	0	0	0.00806452	0	0	0.00344828	0	0	0.025974	0	0
CGDMR	5396	Bd1-1	Bd1	46619000	46619199	199	hyper	0.945946	0.9	0	1	1	1	0.75	0.0143885	0.0277778	0.0227273	0	0	0	0	0.0151976	0.017094	0.0294118	0	0	0.025	0.0263158
CGDMR	5397	Bd1-1	Bd1	46624000	46624499	499	hypo	0.037037	0	0.968	0	0.00985222	0.955056	0	0.0230769	0.00573066	0.571848	0.00934579	0.0120968	0.614085	0	0.00768049	0.00280374	0.0129765	0.00306749	0.00410397	0.00901288	0.00196464
CGDMR	5398	Bd1-1	Bd1	46624600	46624799	199	hypo	0.0175439	0	1	0	1	1	0	0.027027	0	0.352941	0	0	0.763158	0	0	0	0.0169492	0	0.010989	0	0
CGDMR	5403	Bd1-1	Bd1	46641300	46641699	399	hypo	0.0046729	0.959322	1	0.964912	0.974522	0.964758	0.961176	0.0147059	0.681119	0.67803	0.897902	0.814545	0.697368	0.71679	0.00404531	0.0112275	0.0108025	0.010582	0.0105332	0.0233438	0.0217606
CGDMR	5412	Bd1-1	Bd1	46708800	46709099	299	hypo	0	0	0.911111	0.977273	0	0.0204082	0.904255	0.038835	0.0588235	0.74359	0.5	0	0	0.481818	0	0	0.0337079	0.0378378	0	0	0.0219178
CGDMR	5416	Bd1-1	Bd1	46739000	46739199	199	hyper	0.855556	0	0.030303	1	0.925926	0.4	1	0.0173913	0	0.0625	0	0	0	0.027027	0.0107143	0	0	0.00980392	0.00925926	0	0.148936
CGDMR	5417	Bd1-1	Bd1	46764500	46764699	199	hypo	0	1	0.909091	1	0.846154	0.461538	0.555556	0.0212766	0.0263158	0	0.05	0.037037	0	0	0.012987	0	0.00485437	0.0185185	0	0.00564972	0
CGDMR	5418	Bd1-1	Bd1	46764800	46764999	199	hypo	0.21519	0.938462	1	1	0	0.829268	0.909091	0.0236686	0.0384615	0	0	0	0.00990099	0	0.00793651	0	0.00847458	0.0102041	0.0204082	0.00819672	0.00591716
CGDMR	5419	Bd1-1	Bd1	46781800	46782299	499	hypo	0.00471698	0.966704	0.99026	0.965986	0.986164	0.968575	0.976351	0.0194175	0.680921	0.796748	0.811765	0.746479	0.623853	0.73913	0.0074813	0.0181087	0.0285714	0.00877193	0.00222222	0.0202703	0.0155979
CGDMR	5420	Bd1-1	Bd1	46792900	46793099	199	hypo	0.0882353	1	1	0	NA	0	1	0	0.666667	1	0	NA	0	1	0.0178571	0	0.0235294	0	NA	0	0
CGDMR	5421	Bd1-1	Bd1	46793900	46794099	199	hypo	0	0	1	0	0	0	1	0.0277778	0	0.421053	0	0.125	0	0.742857	0	0.017341	0.00684931	0	0	0	0
CGDMR	5424	Bd1-1	Bd1	46808300	46808699	399	hyper	0.964222	0.895149	0.0149254	0.953271	0.0268817	0.950954	0.976	0.35363	0.226496	0.00595238	0.414894	0	0.373239	0.26943	0.00546448	0.00711744	0.00311526	0.015748	0.00383142	0.00199203	0.0150115
CGDMR	5425	Bd1-1	Bd1	46809200	46809499	299	hypo	0.00662252	0	0.793103	0	0	0	0	0.0163934	0.012987	0.030303	0	0.0166667	0.0392157	0.0144928	0.0237154	0.0239521	0.0714286	0	0	0.0144928	0.00469484
CGDMR	5432	Bd1-1	Bd1	46884800	46885099	299	hypo	0.010989	0.953125	0.913793	0	1	0.962963	0.724138	0.019802	0.910112	0.843373	NA	0.615385	0.824324	0.433333	0.00233645	0.0118483	0.00571429	0	0.0075188	0.0186335	0.00330033
CGDMR	5435	Bd1-1	Bd1	46897700	46897899	199	hyper	0.921348	0.883333	0	0.831169	0.958333	0.923077	0.933333	0	0	0	0.0326087	0.0114943	0	0.0408163	0.0243161	0	0.011236	0.0127119	0.00694444	0.018018	0.0130719
CGDMR	5438	Bd1-1	Bd1	46905900	46906299	399	hyper	0.883621	0	0	0.92029	0	0	0.010101	0.59375	0.0113636	0	0.693878	0.0588235	0	0.0206186	0.0201568	0.0100503	0	0.00887574	0	0.0115274	0
CGDMR	5441	Bd1-1	Bd1	46947000	46947799	799	hypo	0.0136364	0.0408998	0.992105	0.305085	0.202206	0.056391	0.12963	0.0126316	0.00616016	0.733547	0.00956938	0.0221402	0.00350877	0.0255682	0.00844156	0.00174368	0.0228445	0.0131796	0.00136799	0.00298063	0.00630517
CGDMR	5447	Bd1-1	Bd1	47022500	47022799	299	hyper	0.832402	0	0.0185185	0	0.111111	0.12963	0.0162602	0.0972973	0	0	0	0.0263158	0.0333333	0	0.0343008	0.0037037	0.0330579	0.0196078	0.0114943	0.00892857	0.00371747
CGDMR	5452	Bd1-1	Bd1	47088700	47088899	199	hypo	0	0	1	0	0.8	0.970588	0.959459	0.037037	0	0.411765	0	0.166667	0.131579	0.441176	0.003003	0	0.0458716	0.0666667	0	0.00823045	0.0174292
CGDMR	5458	Bd1-1	Bd1	47112200	47112399	199	hyper	0.926471	0	0	0	0	0.01	0.0190476	0.562162	0.0153846	0.0263158	0	0	0.015873	0.0208333	0.0133495	0	0	0.017094	0.00740741	0.00724638	0.00421941
CGDMR	5462	Bd1-1	Bd1	47137100	47137299	199	hypo	0.0348837	0.971751	0.895349	0.77305	0.986622	0.972789	0.932161	0.0163934	0.789823	0.666667	0.554054	0.784119	0.70844	0.698355	0	0.0180556	0.056338	0.0321543	0.0114007	0.029321	0.020757
CGDMR	5467	Bd1-1	Bd1	47200200	47200399	199	hypo	0	0.920863	1	0.945652	0.0384615	0.978723	0.985612	0.00833333	0.726161	0.848214	0.918819	0.0615385	0.503497	0.854118	0	0.0111663	0.0114613	0.013245	0.00446429	0.0213904	0.0171504
CGDMR	5468	Bd1-1	Bd1	47201600	47202099	499	hypo	0.0493827	0.970315	0.958333	1	0.973761	0.959559	0.96319	0.052356	0.522184	0.758242	0.561151	0.562212	0.550162	0.599265	0.0117396	0.00960828	0.00204918	0.013245	0.00651042	0.0104076	0.0121951
CGDMR	5470	Bd1-1	Bd1	47215600	47216199	599	hypo	0.0149254	0.936733	0.925329	0.719472	0.967598	0.861272	0.967662	0.0333333	0.458787	0.444079	0.347962	0.374648	0.362963	0.47619	0.015748	0.0117096	0.00877193	0.038817	0.00993378	0.0128676	0.0152941
CGDMR	5473	Bd1-1	Bd1	47220200	47220799	599	hyper	0.942308	0.00502092	0.0078329	0.012987	0.0040568	0.0173776	0.0119522	0.660668	0.00287356	0.0078125	0	0.00757576	0.0265957	0.0210526	0.0118906	0.0113475	0.004	0	0.00675676	0.0133333	0.00142045
CGDMR	5476	Bd1-1	Bd1	47265800	47265999	199	hypo	0.0633397	0.80292	0.946619	0.985626	0.191209	0.10251	0.0921053	0.113445	0.325	0.374101	0.278027	0.356021	0.25	0.25	0.0328228	0.0269542	0.0278552	0.00857143	0.1	0.128364	0.075
CGDMR	5477	Bd1-1	Bd1	47268100	47268899	799	hyper	0.969602	0.0119617	0.0227618	0.0253432	0.0184524	0.00701978	0.0102249	0.68564	0.00531444	0.00255102	0.00511073	0.0137525	0.00839454	0.004329	0.00739372	0.0381503	0.0699844	0.083045	0.0687583	0.0158311	0.0274151
CGDMR	5478	Bd1-1	Bd1	47279900	47281299	1399	hyper	0.945995	0.0606586	0.00911854	0.0075188	0.0381862	0.0440367	0.0260223	0.211775	0.00682594	0.00294985	0.0190476	0.0102459	0.00182815	0.00761905	0.00872375	0.0040404	0.004	0.0121766	0.00757576	0.00070922	0.00432277
CGDMR	5480	Bd1-1	Bd1	47281600	47281999	399	hyper	0.93617	0.0105263	0.0243902	0	0.0909091	0	0.136364	0.0655738	0.0273973	0.03125	NA	0	0	0.037037	0.00910747	0.00280112	0.00628931	0	0	0.00714286	0.0195122
CGDMR	5481	Bd1-1	Bd1	47282100	47282799	699	hyper	0.944245	0.0134228	0.0102041	0.0138889	0	0.00485437	0.0109489	0.210762	0.00888889	0	0	0	0	0	0.010352	0.0058651	0.00478469	0.00380228	0.00775194	0.00881057	0.00765697
CGDMR	5484	Bd1-1	Bd1	47283500	47284099	599	hyper	0.971963	0.00819672	0.00507614	0.00618557	0.0263158	0.00290276	0.00610687	0.256167	0.00793651	0.00806452	0.00760456	0	0.0104167	0.0102302	0.00593912	0.00564972	0.00442478	0.00581395	0.00214592	0.0130435	0.00425985
CGDMR	5485	Bd1-1	Bd1	47284200	47284599	399	hyper	0.978799	0	0.0104167	0	0	0	0.01	0.100817	0.00555556	0	0	0	0.012	0	0.0196078	0.00117509	0.00456621	0	0.0121457	0.0222603	0.00773994
CGDMR	5486	Bd1-1	Bd1	47284700	47285099	399	hyper	0.968586	0	0	0	0	0.0357143	0.0222222	0.27551	0.00724638	0.0625	0	0.0243902	0.0232558	0.0277778	0.0281065	0.00172414	0.0121457	0	0	0.00282486	0.00993378
CGDMR	5487	Bd1-1	Bd1	47285400	47285599	199	hyper	0.921053	0.04	0	0	0	0	0	0.382353	0	0	0	0	0	0	0.008	0	0	0	0	0	0
CGDMR	5488	Bd1-1	Bd1	47285800	47286199	399	hyper	0.975936	0.00966184	0	0.0185185	0.05	0.0481928	0.0128205	0.181185	0	0	0.0188679	0	0.0273973	0.0454545	0.0181044	0.0166271	0	0.00558659	0.00636943	0.00560224	0.0103627
CGDMR	5489	Bd1-1	Bd1	47286400	47286699	299	hyper	0.927711	0	0.0416667	0	0	0	0	0.276471	0	0	0	0.0238095	0	0.0185185	0.0122699	0	0.0138889	0	0.03125	0	0
CGDMR	5490	Bd1-1	Bd1	47286900	47288499	1599	hyper	0.962115	0.00739372	0.00584795	0	0.00833333	0.0124481	0.0116054	0.462698	0.00974659	0.00566572	0.0123457	0.00401606	0.00205761	0.015444	0.00525297	0.00380228	0.00448431	0	0.00133156	0.00334225	0.0057971
CGDMR	5493	Bd1-1	Bd1	47305500	47305899	399	hyper	0.96	0.0659341	0	0.910256	0	0.881119	0.759124	0.644351	0	0	0.106796	0	0.0179641	0.263682	0.00598802	0.00490798	0	0.00484261	0.00887574	0.0100287	0.0263158
CGDMR	5494	Bd1-1	Bd1	47306000	47306399	399	hyper	0.898649	0.0121951	0	0.944444	0.25	0.046875	0	0.0727273	0	0	0.166667	0	0	0	0.0314961	0.00558659	0.0119048	0	0	0	0.018018
CGDMR	5498	Bd1-1	Bd1	47307300	47307799	499	hyper	0.97832	0	0	0.0659341	0.0469799	0.00363636	0.00623053	0.161994	0.0049505	0.010101	0	0.00657895	0.0142349	0.00319489	0.00717213	0.0046729	0.0139373	0.00578035	0.0110497	0.0206022	0.0135135
CGDMR	5499	Bd1-1	Bd1	47316200	47316399	199	hypo	0.00865801	0.784483	0.959596	0.97449	0.977337	0.954023	0.949367	0.0075188	0.522901	0.647059	0.726027	0.742972	0.701587	0.765258	0.00362319	0.00832562	0	0.00625	0.00717949	0.00624442	0.00908174
CGDMR	5506	Bd1-1	Bd1	47384500	47384699	199	hyper	0.956522	0.117647	0.0357143	0.204545	0.26087	1	0.0769231	0.666667	0	0.047619	0	0.166667	0.0384615	0	0.274611	0.229508	0.075	0	0.028169	0.0507246	0.0311419
CGDMR	5510	Bd1-1	Bd1	47405400	47405599	199	hypo	0.0140845	0.583333	1	0	0.857143	0.409091	0.651163	0.0140845	0	0	0	0	0	0	0.00660793	0	0	0	0.00840336	0.00662252	0
CGDMR	5518	Bd1-1	Bd1	47468100	47468299	199	hyper	0.813433	0.0173913	0.0294118	0.0754717	0	0	0.905882	0.645833	0.0204082	0.0461538	0	0.0340909	0.0151515	0.782946	0.0903226	0.00842105	0.0233645	0	0.032491	0.028436	0.128266
CGDMR	5524	Bd1-1	Bd1	47507900	47508199	299	hyper	0.942308	0.958637	0	0	0.991968	0.00406504	0.0149254	0.760684	0.846881	0.0111732	0	0.897516	0.0100671	0.0141343	0.00684931	0.0097561	0.00309597	0	0.0394737	0	0.0124611
CGDMR	5531	Bd1-1	Bd1	47624200	47624399	199	hypo	0.0333333	0.948718	1	0.866667	0.973684	0.888889	0.960784	0.0206186	0.604457	0.671362	0.0517241	0.870075	0.307692	0.759748	0.00166113	0.0152526	0.0172643	0.0046083	0.00796813	0.0277778	0.00906871
CGDMR	5532	Bd1-1	Bd1	47643200	47643399	199	hypo	0	0.625	0.823529	1	0.642857	1	1	0	0.111111	0.0833333	NA	0	0	0	0.0227273	0.00943396	0.0151515	0	0.021978	0	0
CGDMR	5537	Bd1-1	Bd1	47727300	47727599	299	hypo	0	0.803279	0.96	0	0	0.924051	0.480519	0	0.590909	0.46875	0	0	0.481481	0.0625	0.00628931	0.0214669	0.0177165	0	0	0.00802139	0.00717703
CGDMR	5538	Bd1-1	Bd1	47739000	47739399	399	hypo	0.0277393	0.696711	0.897661	0.0269058	0.784962	0.633094	0.637269	0.0147679	0.271062	0.335	0.0444444	0.184855	0.225806	0.206628	0.0151899	0.0676835	0.0409091	0.0793651	0.0567867	0.151724	0.122222
CGDMR	5540	Bd1-1	Bd1	47756500	47756899	399	hypo	0.0614657	0.934195	0.955335	0.961929	0.932673	0.373391	0.939551	0.0136612	0.322904	0.407507	0.479012	0.352881	0.0206718	0.119134	0.00805369	0.0120192	0.0118644	0.00639659	0.0177398	0.00146199	0.030083
CGDMR	5544	Bd1-1	Bd1	47784300	47784599	299	hyper	0.928105	0.922078	0.0933333	NA	0	0.86014	0.00641026	0.319392	0.0106952	0	NA	0.0454545	0.0465116	0	0.00757576	0.00995025	0	NA	0	0.00849858	0.0147059
CGDMR	5546	Bd1-1	Bd1	47786200	47786399	199	hypo	0	0.911111	0.916667	0	0	1	1	0	0.746988	0.852941	0	0	0.527778	0.642857	0.00283286	0.0248963	0.0169492	0	0	0.0267857	0
CGDMR	5555	Bd1-1	Bd1	47864800	47864999	199	hypo	0	0.775862	0.884615	0.9375	1	0.923077	0.929825	0.0394737	0	0	0.285714	0	0	0	0.00531915	0	0	0	0	0	0.0113208
CGDMR	5557	Bd1-1	Bd1	47868000	47868199	199	hyper	0.897436	0.963855	0	0.954545	0.911765	0.961538	0.96	0.245283	0.5	0	0.909091	0.875	0.842105	0.802632	0.00352113	0.00872093	0.0454545	0.0491803	0.0341463	0.0110497	0.0207612
CGDMR	5559	Bd1-1	Bd1	47868800	47869499	699	hyper	0.926076	0.945377	0.02746	0.914849	0.920083	0.972097	0.975221	0.543706	0.730769	0.00977995	0.727903	0.675628	0.734308	0.702502	0.00908761	0.0151629	0.0172043	0.0124777	0.00987728	0.00466745	0.00853055
CGDMR	5560	Bd1-1	Bd1	47874600	47874899	299	hyper	0.875	0	0	0	0	0	0.0416667	0.361111	0.011236	0.0322581	0	0	0	0	0.0373961	0.00568182	0.0229008	0	0	0	0.00389105
CGDMR	5564	Bd1-1	Bd1	47912600	47912899	299	hypo	0.100865	0.734177	0.884354	0	0	0.703704	0.746269	0.0742049	0.395604	0.427273	0.0294118	0.0277778	0.394118	0.460145	0.00909091	0.123438	0.0532915	0	0.0206612	0.194085	0.0819892
CGDMR	5566	Bd1-1	Bd1	47928700	47928999	299	hypo	0.125	0.487805	0.96875	0.862069	1	0.882979	0.673611	0.0230769	0.0849057	0.677419	0.208333	0.35	0.126866	0.206731	0.0218978	0.0261628	0.020979	0.00813008	0.0970874	0.0333333	0.00865052
CGDMR	5567	Bd1-1	Bd1	47936100	47936399	299	hypo	0.057971	0.958525	0.97166	0.949772	0.981851	0.979396	0.966908	0.0530303	0.827138	0.864706	0.885906	0.90881	0.87965	0.891089	0.0233918	0.054878	0.078712	0.0148026	0.0240616	0.0642955	0.174468
CGDMR	5569	Bd1-1	Bd1	47942100	47942499	399	hypo	0.0144928	0.522321	0.981818	0	0.651163	0.028169	0	0.00543478	0.375415	0.689474	0	0.383117	0	0.011236	0.0236559	0.02442	0.0124555	0	0.062963	0.0165746	0.00428265
CGDMR	5570	Bd1-1	Bd1	47942900	47943399	499	hypo	0.00381679	0.0728291	0.830303	0	0.0900164	0.00857143	0.0115607	0.010989	0.0106572	0.0652174	0.0222222	0.0103448	0.0107527	0.00757576	0.0022173	0.0114358	0.0222222	0	0.00862069	0	0.00402685
CGDMR	5571	Bd1-1	Bd1	47944000	47944799	799	hyper	0.903635	0.00660066	0.015625	0	0.0150754	0.00411523	0.00584795	0.501274	0.00826446	0	0	0.0292683	0.0218579	0.00331126	0.0307263	0.00309119	0	0	0.0196721	0.00648298	0.00310238
CGDMR	5579	Bd1-1	Bd1	47987200	47987399	199	hypo	0.0208333	0	0.912281	NA	0	0	0	0	0	0.56701	NA	0	0	0.0363636	0.0291971	0.00571429	0.109541	NA	0	0.0245902	0
CGDMR	5596	Bd1-1	Bd1	48110300	48111099	799	hypo	0.0108548	0.968687	0.981283	0.972881	0.974843	0.972384	0.973473	0.0103806	0.554364	0.385246	0.654118	0.613333	0.193676	0.502538	0.00913242	0.00565428	0.0159635	0.0104167	0.00855746	0.00370599	0.00828729
CGDMR	5598	Bd1-1	Bd1	48129400	48129599	199	hyper	0.866337	0.0206186	0.015873	0	0.0588235	0.00925926	0.00361011	0.303226	0	0.0204082	0	0	0.0294118	0	0.0208333	0.00416667	0.0266667	0	0	0.00793651	0.00472813
CGDMR	5604	Bd1-1	Bd1	48177700	48177999	299	hypo	0.00689655	0.02	0.869565	1	0	0.333333	0.138889	0.03125	0	0.166667	0.772727	0	0.105263	0	0.0125	0.0103093	0	0	0	0.141176	0.028169
CGDMR	5609	Bd1-1	Bd1	48205900	48206199	299	hypo	0.0114943	0.645161	0.894366	0.862069	0.748092	0.798077	0.872727	0	0.25	0.04	0.428571	0.55	0	0.12	0.00552486	0.0101523	0.00383142	0	0.00436681	0.0103093	0.0215633
CGDMR	5611	Bd1-1	Bd1	48217700	48217899	199	hypo	0.0458716	0.903448	0.966667	0	0.952381	0.905882	0.972028	0.0171674	0.0368664	0	0	0.00689655	0	0.0170213	0.0192308	0	0	0	0	0.0176211	0
CGDMR	5612	Bd1-1	Bd1	48230000	48232599	2599	hyper	0.959103	0.473601	0.00918728	0.944213	0.555939	0.516287	0.479162	0.638874	0.252809	0.0144092	0.585073	0.177464	0.281961	0.187842	0.0166308	0.0100069	0.0067352	0.0104096	0.00635818	0.00755391	0.0106248
CGDMR	5615	Bd1-1	Bd1	48288600	48288799	199	hyper	0.918367	0	0	0	0	0	0	0.0526316	0	0	0	0	0	0	0	0	0	0	0	0	0
CGDMR	5616	Bd1-1	Bd1	48320000	48320199	199	hypo	0	0.0571429	0.943396	0	0	0.982759	0.0163934	0.0625	0	0.346154	0	0	0.473684	0.0425532	0.0147059	0	0	0	0	0.0114286	0
CGDMR	5621	Bd1-1	Bd1	48331800	48332199	399	hyper	0.904943	0.0846154	0	0	0	0.847222	0.947826	0.42315	0.0376344	0	0	0.00763359	0.309764	0.444444	0.0383712	0.00669643	0.0122324	0	0.0167785	0.0152339	0.0408389
CGDMR	5626	Bd1-1	Bd1	48378800	48378999	199	hypo	0.0930233	0.222222	1	0	0.75	0.777778	0.833333	0.0454545	0.0416667	0	0	0	0.125	0.153846	0	0	0.0434783	0	0	0	0
CGDMR	5627	Bd1-1	Bd1	48379400	48379799	399	hypo	0.00896861	0	0.967391	0.0227273	0	0	0.0416667	0.0197628	0.0153846	0.0113636	0	0	0	0.00943396	0.0111188	0.0029985	0.00858369	0.0233645	0.00480769	0.00922509	0.00166113
CGDMR	5630	Bd1-1	Bd1	48389100	48389399	299	hyper	0.842105	0.343434	0	0	0	0.25	0	0.040404	0.0142857	0	0.117647	0	0.142857	0	0.00677966	0.00835655	0.0425532	0.0183486	0	0.0277778	0.0135593
CGDMR	5634	Bd1-1	Bd1	48478400	48478599	199	hyper	0.732218	0	0	0	0	0	0.0148148	0.168831	0	0	0	0	0	0	0.0415094	0.0153846	0	0	0	0	0
CGDMR	5635	Bd1-1	Bd1	48483000	48483199	199	hypo	0	0.933333	1	0	0.285714	0.956522	1	0.0833333	0.714286	0.731707	0	0.25	0.647059	0.658537	0	0	0.0121951	0	0	0.0263158	0
CGDMR	5646	Bd1-1	Bd1	48551200	48551399	199	hypo	0	1	0.913043	0.6875	0.967213	0.893617	0.9875	0	0	0.108108	0	0	0	0.00769231	0	0.00985222	0.0204082	0	0.0159363	0.00492611	0.00518135
CGDMR	5647	Bd1-1	Bd1	48551700	48551999	299	hypo	0	0.925373	1	0.857143	0.925373	0.957143	0.897059	0.107843	0.0481928	0.111111	0.117647	0	0.0625	0.0227273	0.013587	0.0113208	0	0.00621118	0.00744417	0.0190217	0.00472813
CGDMR	5648	Bd1-1	Bd1	48556100	48556399	299	hypo	0	1	1	1	1	0.733333	0.954545	0	0.0277778	0	0	0	0	0	0.03125	0.00714286	0.00806452	0	0	0.00943396	0
CGDMR	5652	Bd1-1	Bd1	48605400	48605799	399	hypo	0.0238095	0.949495	1	0	1	0.923077	0.987952	0.00714286	0.87037	0.940678	0	0.472441	0.19	0.898833	0.00625	0.0214408	0.0220441	0.0265487	0.0151844	0.0052356	0.0246809
CGDMR	5655	Bd1-1	Bd1	48617200	48617399	199	hyper	0.914286	0	0	0.5	0.625	0.666667	0.571429	0.0588235	0	0	0	0	0.2	0.0454545	0	0	0	0	0	0	0
CGDMR	5656	Bd1-1	Bd1	48656900	48657499	599	hyper	0.828054	0	0	0	0	0.0075	0.0154799	0.138889	0.00896861	0	0	0.00854701	0.00564972	0.00657895	0.00168067	0.00649351	0.0025	0.00606061	0.0130597	0.00730994	0.00815661
CGDMR	5664	Bd1-1	Bd1	48742300	48742499	199	hyper	0.893678	0.0344828	0.00552486	0.0117647	0.00280899	0.27381	1	0.190789	0.0185185	0	0.0125	0.00442478	0.0433333	0.142857	0.0209581	0	0.0114286	0	0	0	0.0769231
CGDMR	5668	Bd1-1	Bd1	48755700	48756599	899	hypo	0.0078125	NA	0.978632	0.95614	0.944664	0.969697	0	0.0419753	NA	0.697154	0.788018	0.817427	0.673077	0	0.0118265	NA	0.0105202	0.025788	0.0246914	0.00756501	0
CGDMR	5669	Bd1-1	Bd1	48756900	48757599	699	hypo	0.00958466	NA	0.983607	0.905556	0.960133	0.970588	NA	0.0320513	NA	0.685083	0.722222	0.747692	0.75	0	0.0150602	NA	0.00565771	0.0175953	0.0111888	0.00840336	1
CGDMR	5670	Bd1-1	Bd1	48759400	48760299	899	hypo	0.0161812	0.027027	0.961538	0.905263	0.823129	0.868365	0.0140845	0.0123967	0	0.715302	0.833333	0.768248	0.787135	0.00892857	0.012747	0.00223714	0.00929368	0.0196629	0.0114504	0.00891089	0.016129
CGDMR	5671	Bd1-1	Bd1	48760600	48761099	499	hypo	0.0464135	0.0153846	0.989418	0.864865	0.962264	0.980843	0.0923077	0.0123457	0.00869565	0.822222	0.79562	0.780702	0.758958	0	0.00650195	0.00650759	0.0078125	0.0102669	0.0122324	0.0111982	0
CGDMR	5672	Bd1-1	Bd1	48761900	48762499	599	hypo	0.0300752	0.90885	0.976161	0.957904	0.889902	0.970263	0.954348	0.031457	0.640058	0.655738	0.733096	0.565547	0.595128	0.573377	0.00809717	0.0168755	0.00419413	0.0168776	0.0225564	0.0116667	0.00671
CGDMR	5673	Bd1-1	Bd1	48763000	48763199	199	hypo	0	0.985915	1	0	1	0.862069	0.580645	0	0.59589	0.903226	0	0.813333	0.79798	0.243697	0.00671141	0.0268817	0.00847458	0	0.012931	0.0174927	0.0179949
CGDMR	5674	Bd1-1	Bd1	48763400	48763599	199	hypo	0.105263	0.859459	0.991803	0.0454545	0.955975	1	0.995633	0.0122699	0.828125	0.715302	0	0.946472	0.836478	0.670913	0.00915332	0.000852515	0.00764331	0	0.0104083	0.0145587	0.00773395
CGDMR	5675	Bd1-1	Bd1	48763900	48764899	999	hypo	0.0282486	0.95481	0.981481	0	0.985272	0.930804	0.973918	0.0134933	0.693055	0.786517	0.0126582	0.685512	0.659612	0.705347	0.00878845	0.00932568	0.00749465	0.0131004	0.00656716	0.0108207	0.00822368
CGDMR	5677	Bd1-1	Bd1	48765400	48765699	299	hypo	0.0119048	0	0.994012	0.0151515	0.967568	0.968182	0	0.0264901	0.0145985	0.0704846	0.0212766	0.220217	0.143302	0.00813008	0.00160514	0	0.00340136	0.00483092	0.0144	0.00843882	0
CGDMR	5679	Bd1-1	Bd1	48789800	48790199	399	hypo	0.113475	0.016129	0.960265	0.108696	0	0.222222	0.0508475	0.0251572	0	0.651822	0	0	0.00952381	0.015625	0.00304414	0.0115321	0.0104068	0.00456621	0.0037037	0	0.0107527
CGDMR	5682	Bd1-1	Bd1	48795600	48795799	199	hypo	0	0	0.929412	NA	NA	0	0	0.00806452	0	0.578125	NA	NA	0	0.05	0	0.0188679	0.0670732	NA	NA	0	0
CGDMR	5685	Bd1-1	Bd1	48809700	48809899	199	hypo	0.210526	0	1	0	0	0	0.0909091	0	0	0.512195	0	0	0	0.037037	0.148387	0.0166667	0.183206	0	0	0	0.236111
CGDMR	5694	Bd1-1	Bd1	48885300	48885599	299	hyper	0.958696	0.946352	0	0.0833333	0.0175953	0.00980392	0.969697	0.431973	0.520979	0	0	0	0	0.650862	0.0284939	0.0155039	0.0152284	0	0.00852879	0.00505051	0.0292683
CGDMR	5710	Bd1-1	Bd1	49017000	49017199	199	hypo	0	0.0344828	0.77	0	0.0606061	0.130435	0.796	0.0272727	0	0.107143	0	0.0652174	0.047619	0.0797101	0.0060423	0	0	0	0	0	0.00744417
CGDMR	5712	Bd1-1	Bd1	49017600	49017899	299	hypo	0.00442478	0	0.967213	0	0.923497	0.992857	0.986667	0.0163934	0	0.030303	0	0.384615	0.191011	0.0515464	0	0	0	0	0.00588235	0.00711744	0.0176056
CGDMR	5713	Bd1-1	Bd1	49098300	49098599	299	hyper	0.902597	0	0	0	0	0	0	0.196	0	0	0	0	0	0	0.0110159	0.00438597	0.00719425	0	0	0	0
CGDMR	5717	Bd1-1	Bd1	49117600	49117999	399	hypo	0.0474255	0.78777	0.932773	0.75	0.00277778	0.00693241	0.936656	0.0187668	0.026538	0.0330579	0.0315789	0.0056338	0.0103627	0.0460385	0.0278146	0.00501882	0.0292793	0.00485437	0.014652	0.00694444	0.0111483
CGDMR	5718	Bd1-1	Bd1	49132500	49132899	399	hyper	0.922581	0.978769	0.0135135	0.00892857	0.970827	0.00554529	0.958246	0.751073	0.765823	0.0177778	0	0.839695	0.00306749	0.761518	0.0100671	0.00993789	0.00689655	0	0.0159787	0.008	0.00700935
CGDMR	5729	Bd1-1	Bd1	49212200	49212399	199	hypo	0.142857	0.666667	0.931034	NA	0.25	0.409091	0.666667	0	0	0	0	0	0.0217391	0	0.0598802	0	0.00543478	0	0.0294118	0.0365297	0.0285714
CGDMR	5730	Bd1-1	Bd1	49217100	49217299	199	hyper	0.773333	0.0212766	0	0	0	0	0	0.225806	0	0	0	0	0	0	0.00824176	0	0	0	0.00862069	0	0
CGDMR	5732	Bd1-1	Bd1	49220400	49220999	599	hypo	0.107836	0.180129	0.960784	0.00735294	0.230903	0.0114943	0.134328	0.0318792	0.0178306	0.390728	0.00462963	0.037594	0	0.0249653	0.0115473	0.00872093	0.0275591	0.00527705	0.0102041	0	0.0106667
CGDMR	5735	Bd1-1	Bd1	49258000	49258199	199	hypo	0.0221519	0	0.977778	0.0178571	0.0397351	0.0224719	0	0.0384615	0	0.830303	0.00657895	0.0384615	0.0131579	0.0531915	0.0193548	0	0.00722022	0.0331492	0	0.0243902	0
CGDMR	5746	Bd1-1	Bd1	49371600	49371899	299	hypo	0.0169014	0.0215054	0.949367	0.985714	0.880814	0	0.894737	0.00452489	0.0208333	0.475	0.61157	0.277778	0.0847458	0.24026	0.0105634	0	0.0146341	0.0209059	0.0142857	0	0.00996016
CGDMR	5749	Bd1-1	Bd1	49387100	49389099	1999	hypo	0.0123402	0.00698603	0.981481	0.901077	0.92202	0.00965361	0.54722	0.0123381	0.00320102	0.571182	0.521151	0.432083	0.0103421	0.0378959	0.00709723	0.00733496	0.00637755	0.017094	0.0113037	0.00704989	0.00984752
CGDMR	5750	Bd1-1	Bd1	49396700	49397499	799	hypo	0.0120594	0.0294118	0.925419	0.850987	0.844169	0.0186667	0.0322581	0.0049505	0.00791557	0.324405	0.192691	0.148893	0.00847458	0.0169779	0.00744602	0.00693642	0.0625	0.0164234	0.0102987	0.027673	0.0467359
CGDMR	5751	Bd1-1	Bd1	49400600	49400899	299	hypo	0.0523077	0.062963	0.845921	0.717949	0.936107	0	0.091195	0.0184502	0.0213675	0.365385	0.27193	0.293413	0	0.0234375	0.00405405	0.00760456	0.184941	0.0786517	0.0328185	0.00420168	0.00513699
CGDMR	5757	Bd1-1	Bd1	49476900	49477099	199	hypo	0	0	0.928571	0	0.835616	0.662651	0	0.0182927	0.0506329	0.394737	0	0.612903	0.170732	0	0.0028169	0.00574713	0.0215054	0	0.00591716	0.079602	0
CGDMR	5758	Bd1-1	Bd1	49484700	49484899	199	hypo	0.025641	NA	1	0	0.0434783	NA	NA	0.0416667	NA	0.412698	0	0.0172414	NA	NA	0.00490196	NA	0	0	0	NA	NA
CGDMR	5759	Bd1-1	Bd1	49486900	49487099	199	hypo	0.123223	0	0.956522	0.111111	0.94958	0.96	0.818182	0.204301	0.2	0.709677	0.666667	0.763158	0.9	0.769231	0.0116473	0	0.00943396	0.0681818	0.0395683	0.158537	0.0722892
CGDMR	5760	Bd1-1	Bd1	49492900	49493099	199	hypo	0	0.666667	1	0.8	NA	0.6	0.741935	0	0.466667	0.428571	0.5	NA	0.0909091	0.285714	0	0	0	0	NA	0.0677966	0
CGDMR	5771	Bd1-1	Bd1	49564200	49564399	199	hyper	0.875	0.142857	0	0	0	0.166667	0	0	0	0	0	0	0	0	0.0120482	0	0	0	0	0	0
CGDMR	5773	Bd1-1	Bd1	49582100	49582299	199	hyper	0.758065	0	0	0.216216	0	0	0	0.0190476	0.0140845	0	0	0	0.0263158	0	0.0480769	0	0	0.0163934	0.0315789	0.00819672	0
CGDMR	5781	Bd1-1	Bd1	49700500	49700699	199	hyper	0.804598	0	0	0	0	0	0	0.0140845	0	0	0	0	0	0	0	0	0	0.0952381	0	0.0163934	0
CGDMR	5788	Bd1-1	Bd1	49766000	49766199	199	hypo	0.0111111	0	0.915493	0.0769231	0	0	0.125	0	0	0.492537	0	0.285714	0	0	0	0	0	0	0	0	0.0217391
CGDMR	5790	Bd1-1	Bd1	49773500	49773699	199	hypo	0.00735294	0.342657	0.838235	0.246575	0.883249	0.25	0.0597015	0.0268456	0	0	0.0263158	0.0215054	0.00757576	0	0.0138408	0	0.00724638	0	0	0.00454546	0.0152672
CGDMR	5792	Bd1-1	Bd1	49872800	49872999	199	hypo	0.015873	NA	0.88172	NA	NA	NA	0	0	NA	0.263158	NA	NA	NA	0	0.0108696	NA	0.025641	NA	NA	NA	0.571429
CGDMR	5797	Bd1-1	Bd1	49922000	49922199	199	hyper	0.967638	0.00819672	0.010989	0	0.027027	0.00990099	0	0.264706	0	0	0.00598802	0.0145985	0	0	0.053528	0	0	0	0	0.017316	0.021097
CGDMR	5800	Bd1-1	Bd1	50015800	50016599	799	hyper	0.938893	0.00450958	0.00236967	0.950931	0.00409836	0.0163112	0.00498132	0.114327	0.0134875	0.00990099	0.110769	0.0136986	0.00689655	0.00707547	0.00873709	0.01	0.00481928	0.00222222	0.00784929	0.00634921	0.00596125
CGDMR	5805	Bd1-1	Bd1	50078500	50078699	199	hyper	0.870968	0.833333	0	1	0.655172	0.652174	0.3125	0.0168539	0	0	0.0625	0	0	0	0.0246253	0.00471698	0	0.0222222	0.00684931	0.0037594	0.00613497
CGDMR	5806	Bd1-1	Bd1	50092400	50092599	199	hypo	0.111111	0.136364	0.923077	0.166667	0.297297	0.580645	0.326923	0	0	0	0	0	0	0	0.00920245	0.00966184	0.00909091	0	0	0.00515464	0.00763359
CGDMR	5808	Bd1-1	Bd1	50115800	50115999	199	hypo	0.114583	0	0.92	0.861111	0	0	0.156863	0.0338983	0	0.4	0.678571	0.0153846	0	0	0.00628931	0	0.0116959	0.0295858	0	0.00671141	0
CGDMR	5810	Bd1-1	Bd1	50124900	50125199	299	hyper	0.963225	0.950798	0.0117647	0.985849	0.954098	0.981618	0.00719425	0.460259	0.521441	0	0.666667	0.673563	0.609148	0	0.00611621	0.0339879	0.0116279	0.00476947	0.0852106	0.0102389	0
CGDMR	5814	Bd1-1	Bd1	50159000	50159399	399	hypo	0.022541	0.014652	0.96633	0.0224719	0.105469	0.018018	0.00438597	0.0173267	0	0.348	0	0.0078125	0	0	0.0141509	0.00643777	0.00711744	0.0409357	0.00528169	0.00650759	0.00180832
CGDMR	5815	Bd1-1	Bd1	50162800	50162999	199	hypo	0	0	0.913043	NA	0	0	0	0	0	0.258065	NA	0	0	0	0.0195312	0	0.0122699	NA	0	0.016129	0.011236
CGDMR	5817	Bd1-1	Bd1	50165400	50165599	199	hypo	0.101562	0.828571	0.974359	0.981132	0.90604	0.632911	0	0	0	0.125	0.455556	0.238095	0.0227273	0	0.00914634	0.00392157	0	0	0.00519481	0.00546448	0
CGDMR	5818	Bd1-1	Bd1	50166800	50167099	299	hypo	0	0.643678	0.946237	0.45	0.855263	0.746835	0.0155039	0.009375	0.14359	0.14	0	0.142857	0.0510204	0.0230769	0.0175676	0.0123457	0	0.0222222	0	0.00763359	0
CGDMR	5819	Bd1-1	Bd1	50169600	50169899	299	hypo	0.0233333	0.95679	0.921875	1	0	0	0	0.0212766	0.138158	0.0925926	0.548387	0	0	0	0.00511771	0.0100167	0.00473934	0	0.0238095	0	0.00612245
CGDMR	5820	Bd1-1	Bd1	50174300	50174499	199	hypo	0	0.955882	0.931034	0.972222	0	0.0952381	0.0461538	0	0.363636	0.678571	0.517241	0.0163934	0.0344828	0.038961	0.00141844	0.00541516	0.0268817	0	0.00378788	0.00675676	0.01
CGDMR	5821	Bd1-1	Bd1	50174600	50175699	1099	hypo	0.00535236	0.942688	0.976	0.976149	0.975287	0.97622	0.971673	0.0110672	0.793256	0.820014	0.810547	0.780317	0.727246	0.831498	0.00830816	0.0171648	0.013741	0.0118567	0.0115953	0.015873	0.0173536
CGDMR	5822	Bd1-1	Bd1	50181900	50182199	299	hyper	0.860465	0.569444	0	0	0.951807	0.840708	0.891892	0	0	0	0	0.0238095	0	0	0.00787402	0.00497512	0.00961539	0	0.00701754	0.0203046	0.035461
CGDMR	5823	Bd1-1	Bd1	50188400	50190999	2599	hyper	0.926756	NA	0.012239	0.972366	0.963583	0	0.968486	0.516544	NA	0.0116086	0.786667	0.782851	0.5	0.820604	0.0230821	NA	0.00518403	0.0184255	0.030303	0	0.0119667
CGDMR	5825	Bd1-1	Bd1	50197600	50197799	199	hypo	0.137931	0.92	0.9375	1	1	0.931034	1	0.0196078	0.09375	0.241379	0.24	0.272727	0.466667	0.235294	0	0	0	0	0	0.0192308	0.0392157
CGDMR	5828	Bd1-1	Bd1	50215600	50215899	299	hypo	0	0	0.957143	0	0.972973	0.75	0.0816327	0	0.0117647	0.512605	0	0.532787	0.180851	0.012987	0.0111732	0.0277778	0.00902934	0	0.011811	0.00319489	0.00561798
CGDMR	5841	Bd1-1	Bd1	50401600	50401799	199	hyper	0.882353	0.768116	0	NA	0.861386	0.673913	0.805556	0	0.201149	0.0425532	NA	0.170543	0.0737705	0.0595238	0	0.00967742	0	NA	0.00233645	0.00561798	0
CGDMR	5845	Bd1-1	Bd1	50408600	50409099	499	hyper	0.903825	0.00371057	0.00769231	0.00591716	0.0576441	0.0116822	0.0347734	0.0486009	0.00826446	0.00896861	0	0.014218	0.0163265	0.0182149	0.00629921	0.00148148	0.004329	0.010989	0.00540541	0.00675676	0.00520833
CGDMR	5851	Bd1-1	Bd1	50498400	50498599	199	hypo	0.153846	0	1	0	0	NA	NA	0	0	0.210526	0	0	NA	NA	0	0.015625	0.0337079	0	0.0285714	NA	NA
CGDMR	5853	Bd1-1	Bd1	50503300	50504199	899	hyper	0.971132	0.00590551	0.00609756	0.00906344	0.0152174	0.00914077	0.00776699	0.681196	0.0117509	0.0104603	0.0143369	0.00668151	0.0196464	0.00627615	0.00934268	0.00347705	0.0145631	0.0107817	0.00510204	0.00300752	0.0113154
CGDMR	5854	Bd1-1	Bd1	50505000	50505199	199	hypo	0.03125	0.866667	0.784314	0	NA	NA	NA	0.0517241	0.728395	0.410526	0	NA	0	0	0	0.0155211	0.0313316	0	NA	0	0
CGDMR	5863	Bd1-1	Bd1	50640200	50640599	399	hypo	0.0171756	0.0682819	0.888889	0.164835	0.822134	0.224138	0.917778	0.0166945	0	0.0133333	0	0.00931677	0.010929	0.0116279	0.0257542	0.00523013	0.0157068	0.0109489	0.00454029	0.00798403	0.00731452
CGDMR	5864	Bd1-1	Bd1	50640900	50641199	299	hypo	0	0.770992	0.966667	0.764706	0.952	0	0.232143	0.00606061	0.012987	0.0128205	0.0588235	0.0362319	0	0.0144928	0.00412371	0.00236967	0.0103093	0.00990099	0.00802139	0.00928793	0.0192308
CGDMR	5871	Bd1-1	Bd1	50717300	50717499	199	hyper	0.926316	0	0.05	0	0	0	0	0.0338983	0	0	0	0	0	0	0.0181818	0	0.0380952	0	0.0188679	0	0.0133333
CGDMR	5872	Bd1-1	Bd1	50721800	50721999	199	hypo	0	0	0.885714	0.820225	0.779661	0.911765	0.860294	0	0.04	0.509804	0.578947	0.62069	0.565217	0.655738	0.0217391	0	0.0140187	0.15493	0.183575	0.264706	0.330128
CGDMR	5875	Bd1-1	Bd1	50747300	50747699	399	hypo	0.0153846	0.905109	0.928571	0.860465	0.938776	0.878788	0.945455	0.0201342	0.540816	0.544118	0.787879	0.457944	0.6	0.571429	0.00797872	0.00773694	0.00229885	0	0.00487805	0.0144231	0.00765306
CGDMR	5877	Bd1-1	Bd1	50806800	50806999	199	hyper	0.97	0.933333	0.0588235	1	0.933333	0.73913	0.486486	0.00440529	0.0267857	0	0	0	0	0	0.00985222	0	0.0111111	0	0.0416667	0.00903615	0.00531915
CGDMR	5879	Bd1-1	Bd1	50848000	50848199	199	hyper	0.94898	0	0.0571429	0.90566	0	0	0	0.70696	0.0070922	0	0.554217	0	0	0	0.0350318	0.0122951	0	0.146789	0	0	0.0191388
CGDMR	5880	Bd1-1	Bd1	50853500	50853699	199	hyper	0.92053	0.907407	0	0.857143	0	0	0.884615	0.0045045	0.0134228	0	0	0	0	0.0117647	0.00713013	0.0132626	0	0.0128205	0	0	0.010989
CGDMR	5882	Bd1-1	Bd1	50877300	50877699	399	hypo	0.00621118	0.956989	1	0.9	0	0.928144	0.983871	0.0294985	0.884422	0.896774	0.976744	0.0121951	0.887789	0.91358	0.00726612	0.00952381	0.0159574	0.00558659	0.015748	0.0139635	0.00964912
CGDMR	5887	Bd1-1	Bd1	50917700	50917999	299	hyper	0.915385	0.43318	0	0.0625	0.61809	0.867403	0.561856	0.0321429	0.0123153	0	0	0.00925926	0.0175953	0.0133333	0.00736648	0.0042796	0.0163265	0.00606061	0.00831601	0.00725953	0.0105448
CGDMR	5896	Bd1-1	Bd1	50975300	50975499	199	hyper	0.977848	0.972136	0	0.95935	0.0375	0.0375	0.953804	0.457286	0.581633	0	0.623377	0.0222222	0	0.558824	0.0199501	0.0200445	0	0.0709677	0	0	0.00225734
CGDMR	5897	Bd1-1	Bd1	50997400	50997599	199	hypo	0	0.960526	1	NA	0	0.90566	0	0.047619	0.842697	0.25	0	0	0.882353	0.08	0.00847458	0.00581395	0.027972	0	0.0588235	0.0148976	0
CGDMR	5898	Bd1-1	Bd1	51010400	51010799	399	hyper	0.751412	0.0129032	0	0.418182	0.444444	0	0	0.0140187	0	0	0	0	0	0	0.0078534	0.00343643	0	0	0.00338983	0.00797872	0.018622
CGDMR	5903	Bd1-1	Bd1	51037500	51037699	199	hypo	0	0.869565	0.970588	NA	0	0.697674	0.03125	0.0227273	0.529412	0.733333	NA	NA	0.25	0	0	0.00726392	0.0146341	NA	0	0.0321101	0
CGDMR	5906	Bd1-1	Bd1	51061700	51061899	199	hyper	1	0	0	NA	0	0.235294	0.733333	0.0338983	0.03125	0	0	0	0	0	0.0121457	0	0	0	0	0.0117647	0.0142857
CGDMR	5909	Bd1-1	Bd1	51066100	51066599	499	hypo	0.0341151	0.966754	0.987152	0.0116279	0.0181818	0.0160772	0.982484	0.03125	0.859429	0.918831	0.0147059	0.0127389	0.0121654	0.893171	0.0084507	0.0100365	0.0104822	0	0.00373832	0	0.00737207
CGDMR	5916	Bd1-1	Bd1	51096200	51096599	399	hypo	0.0135135	0.958333	0.955556	0.990566	1	0.991903	0.987603	0.0760234	0.670157	0.666667	0.914286	0.764706	0.668539	0.661202	0.00677966	0.00557414	0.00546448	0.0321637	0.0046083	0.00643501	0.0199203
CGDMR	5918	Bd1-1	Bd1	51099800	51100099	299	hyper	0.932886	0	0	0.05	0.0357143	0	0.471429	0.0035461	0	0	0.0192308	0	0.0352941	0	0.00767263	0.00990099	0.0163934	0.00892857	0.010101	0.00740741	0.0161725
CGDMR	5919	Bd1-1	Bd1	51102000	51102199	199	hypo	0	0.962264	1	0.8	0.969697	0.985075	0.966102	0	0	0.0277778	0	0	0.0253165	0.0240964	0.0134771	0.0193237	0	0	0.0148148	0.00684931	0
CGDMR	5925	Bd1-1	Bd1	51137800	51137999	199	hypo	0	0.135802	0.931034	0	0	0	0.127273	0	0	0	0	0	0	0	0	0	0	0	0	0.0258065	0
CGDMR	5927	Bd1-1	Bd1	51207700	51208199	499	hypo	0.0200401	0.952234	0.997238	0.0238095	0.959752	0.949367	0.902422	0.0163934	0.161972	0.511111	0	0.309091	0.40634	0.223837	0.0078125	0.00849858	0	0	0.0162602	0.00461255	0.00658514
CGDMR	5929	Bd1-1	Bd1	51261400	51261599	199	hypo	0.16	0.944444	0.923077	0.4	1	1	0.944444	0.230769	0.704545	0.655172	0.0588235	0.75	0.782609	0.512195	0	0.0046729	0.0162602	0	0.0137931	0.00641026	0.00568182
CGDMR	5930	Bd1-1	Bd1	51275000	51275299	299	hypo	0.00454546	0.699487	0.917021	0.00705467	0.952725	0.798895	0.785714	0.00687285	0.207317	0.267742	0.00687285	0.64698	0.180266	0.246291	0.00429184	0.00518672	0.0119048	0	0.0291519	0.0129171	0.0105062
CGDMR	5933	Bd1-1	Bd1	51374100	51374299	199	hypo	0.0119048	0.958333	1	1	1	0.967391	0.959184	0.0846154	0.712195	0.726562	0.585106	0.675325	0.646465	0.671429	0.00581395	0.00900901	0.0234834	0.00274725	0.0126404	0.00463679	0.00611995
CGDMR	5934	Bd1-1	Bd1	51376900	51377099	199	hyper	0.92562	0	0.0133333	1	0	0.870968	0.0175439	0.0129032	0	0	0.09375	0	0	0.0108696	0.0114416	0	0.003367	0.172043	0	0	0
CGDMR	5935	Bd1-1	Bd1	51382200	51382399	199	hypo	0.027972	0.956044	0.971429	1	1	0.980952	0.984127	0.0454545	0.589744	0.714286	1	0.64	0.470588	0.8	0.024055	0.0176991	0	0.0344828	0.023622	0.0175439	0.00738007
CGDMR	5936	Bd1-1	Bd1	51382600	51382799	199	hypo	0.0636364	0.938776	1	0.982143	0.9375	0.971831	0.940741	0.0568182	0.853333	1	0.733333	0.869565	0.61	0.757895	0.002079	0.0152091	0.0172414	0.0450928	0.0249221	0.0214724	0.0245232
CGDMR	5943	Bd1-1	Bd1	51467300	51467899	599	hypo	0.043088	0.816733	0.924686	0.197183	0.631579	0.782946	0.799569	0.00882353	0.00751073	0.00456621	0.00823045	0.00904159	0.0196629	0.0129108	0.00496524	0.00486855	0.00704225	0.00217391	0.00322321	0.00711322	0.00510725
CGDMR	5950	Bd1-1	Bd1	51487300	51487499	199	hypo	0.0714286	0	1	0	NA	0.952381	0.952381	0	0	0.512195	0	NA	0.517241	0.708861	0.00775194	0	0	0	NA	0	0
CGDMR	5951	Bd1-1	Bd1	51487600	51487799	199	hypo	0.0136986	0	1	0.62963	0.846154	0.933333	0.985507	0.0769231	0	0.285714	0	0	0	0.105263	0.00476191	0.00757576	0.0125	0.0111111	0.0454545	0.0125	0.00813008
CGDMR	5952	Bd1-1	Bd1	51494800	51495099	299	hypo	0.020979	0.944272	0.995327	0.0144928	0.972441	0.97093	0.0510204	0.0122699	0.828221	0.796209	0	0.860714	0.81155	0.0227273	0.00617284	0.0133482	0.011544	0	0.011378	0.0215827	0.00536193
CGDMR	5955	Bd1-1	Bd1	51501100	51501299	199	hyper	0.888889	0	0	0.0238095	0	0	0.0168067	0.0263158	0	0	0	0	0	0	0.00167224	0.0113852	0	0	0	0.0105263	0.00527705
CGDMR	5958	Bd1-1	Bd1	51530400	51530599	199	hypo	0.012987	0.964706	0.966292	0.951613	1	0.679487	0.965116	0.00900901	0.574324	0.326087	0.323529	0.247525	0.0463576	0.564103	0	0.00674157	0.00746269	0.0197368	0.0128617	0.00869565	0.0338542
CGDMR	5961	Bd1-1	Bd1	51541200	51541399	199	hypo	0	0.940299	1	0.875	0.959732	0.935484	0.95814	0.5	0.794872	1	0.5	0.771429	0.230769	0.735294	0	0.0208333	0	0	0.0155039	0.0172414	0.0283688
CGDMR	5966	Bd1-1	Bd1	51569800	51570699	899	hypo	0.0130548	0.0247934	0.983503	0.0702341	0.0947368	0.971172	0.0395257	0.0127042	0.0156556	0.64494	0.030303	0.0533333	0.566301	0.056391	0.00694444	0.00848999	0.011622	0.00981767	0.0407632	0.0163511	0.0411967
CGDMR	5968	Bd1-1	Bd1	51596900	51597099	199	hypo	0	0.0222222	0.96	0	0.347826	1	0.280702	0.0240964	0.025641	0.285714	0	0	0.2	0.0181818	0.00465116	0.00309597	0.00526316	0.00840336	0	0.0160428	0.0025641
CGDMR	5969	Bd1-1	Bd1	51601500	51601699	199	hyper	0.91954	0.0210526	0.0189873	0.90411	0.030888	0.0114286	0.986047	0.268293	0.0176991	0	0.108108	0.0196078	0.01	0.195312	0.00839161	0.00537634	0.0041841	0.00549451	0	0.0364372	0.0057971
CGDMR	5970	Bd1-1	Bd1	51606600	51607199	599	hyper	0.947053	0.0234279	0.0144231	0.975046	0.00779221	0.0135922	0.979786	0.570132	0.0152355	0.0147783	0.736264	0.0157895	0.0105485	0.638889	0.00779925	0.0152727	0.070632	0.00769625	0.0223464	0.0321199	0.0104682
CGDMR	5971	Bd1-1	Bd1	51635700	51635999	299	hypo	0	0.929577	0.94	0	0.6	0.958333	0	0.0243902	0.588785	0.449275	0	0.0769231	0.510638	0	0.011583	0.00840336	0.0121212	0	0	0.0193237	0
CGDMR	5972	Bd1-1	Bd1	51636100	51636299	199	hypo	0	0.974684	1	0	0.927273	0.923913	1	0.0294118	0.835821	0.877193	0	0.5625	0.816901	0	0	0.0060241	0.00828729	0.0169492	0.0104167	0.00864553	0
CGDMR	5973	Bd1-1	Bd1	51641000	51641199	199	hypo	0	0.87037	0.947368	0.666667	1	0.973684	NA	0.0454545	0.241135	0.702381	0.222222	0.666667	0.154762	NA	0	0.0233645	0.0227273	0	0	0.00657895	NA
CGDMR	5974	Bd1-1	Bd1	51641300	51641499	199	hypo	0	1	0.942308	0	0.939394	1	NA	0.118644	0.176471	0.8	0.333333	0.869565	0.787037	NA	0.00363636	0	0.016129	0	0.036036	0.0180505	NA
CGDMR	5981	Bd1-1	Bd1	51703100	51703299	199	hyper	0.931818	0	0	0	0.678571	0	0.8	0.0307692	0	0	0	0	0	0.0140845	0.00847458	0	0	0.0217391	0	0.00657895	0.00436681
CGDMR	5985	Bd1-1	Bd1	51752400	51752599	199	hyper	0.969697	0	0	0	NA	0	0.970149	0.486111	0	0	0	NA	0	0.765766	0.0211538	0	0	0.027027	NA	0	0.0301659
CGDMR	5986	Bd1-1	Bd1	51752700	51752899	199	hyper	0.954545	0	0	0	0	0	0.921739	0.776119	0	0	0	0	0	0.908451	0.00766871	0.00588235	0	0	0	0.0186916	0.0182841
CGDMR	5987	Bd1-1	Bd1	51753000	51753199	199	hyper	1	0.130435	0	NA	0.777778	0	0.962264	0.666667	0	0	NA	0	0	0.4	0	0	0	NA	0.0434783	0.0263158	0.0222222
CGDMR	5989	Bd1-1	Bd1	51770200	51770599	399	hyper	0.902116	0.392713	0	0.824	0.682008	0.362069	0.611354	0.0121581	0.00448431	0	0.0181818	0.0185185	0.0276243	0.0201005	0.00498891	0.00965406	0.00171233	0.00162602	0.00369004	0.00537634	0.00558659
CGDMR	5992	Bd1-1	Bd1	51795700	51795999	299	hyper	0.976331	0.00746269	0.025	0.984615	0.969163	0	0	0.563492	0.0310078	0.0224719	0.835714	0.821429	0.0169492	0.0307692	0.00769231	0	0	0.00265957	0.00253807	0.00438597	0
CGDMR	5993	Bd1-1	Bd1	51796100	51796699	599	hyper	0.978244	0.00311203	0.00651466	0.984615	0.97868	0.00314465	0.0122283	0.786145	0.00643087	0.00483092	0.890335	0.820619	0.0123457	0.0242424	0.0220669	0.00562984	0	0.00560748	0.00796813	0.00729927	0.0177365
CGDMR	5995	Bd1-1	Bd1	51797400	51797699	299	hypo	0.0103306	0.977578	0.99187	0.0151515	0.00892857	0.956311	0.954023	0.0181159	0.899225	0.925926	0.0227273	0.0379747	0.97006	0.951754	0.00754006	0.00994318	0.00921659	0.032967	0.0160858	0.00955414	0.00672043
CGDMR	5997	Bd1-1	Bd1	51804700	51805299	599	hyper	0.979975	0.965179	0.00806452	0.993534	0.85761	0.973558	0.0128866	0.753388	0.705882	0.0126582	0.734177	0.618677	0.674667	0.0247191	0.0199005	0.0236686	0	0.0248756	0.0687831	0.0149457	0.00673854
CGDMR	6001	Bd1-1	Bd1	51893900	51894099	199	hypo	0.010101	0.651852	0.963636	0	0.0512821	0.969072	0.826772	0.0405405	0.394444	0.553571	0	0	0.54386	0.467391	0.0101781	0.0119048	0.0222222	0	0.012987	0.00806452	0.014433
CGDMR	6002	Bd1-1	Bd1	51894800	51895199	399	hypo	0	0	0.913978	0	0.963415	0.984694	0	0.027027	0.0378788	0.506849	0.0731707	0.684426	0.522222	0.0243902	0.00282486	0.0022173	0.0111857	0.00561798	0.0190616	0.00627353	0.00449438
CGDMR	6005	Bd1-1	Bd1	51955200	51955499	299	hypo	0	0.5	0.962264	0	0.285714	0.277778	0.0909091	0.0566038	0.0666667	0.222222	0.666667	0.1	0.0106383	0	0.0101523	0	0.0116279	0	0	0.00668896	0.00840336
CGDMR	6006	Bd1-1	Bd1	51957500	51957699	199	hypo	0	0.518519	0.901961	0.833333	0.935484	0.718447	0.288136	0.0727273	0	0.02	0.0416667	0.0714286	0.0638298	0	0	0	0	0.0165746	0.00668896	0.00431965	0.00478469
CGDMR	6007	Bd1-1	Bd1	51962700	51962899	199	hypo	0.0142857	0.028169	0.949153	0	0	0.987805	0.994845	0	0.0625	0.666667	0	0.222222	0.781818	0.781818	0	0	0.0521739	0.0363636	0	0.0167785	0.0308219
CGDMR	6011	Bd1-1	Bd1	52020600	52021399	799	hyper	0.952247	0.00890019	0.00647249	0.00660066	0.00513699	0.0181818	0.0132275	0.448925	0.017982	0.0108108	0.00519481	0.0227273	0.0166359	0.00632911	0.0153509	0.0070713	0.010274	0.0150943	0.0133038	0.0174825	0.00775946
CGDMR	6012	Bd1-1	Bd1	52022000	52022199	199	hypo	0	0	0.8125	0	0.0208333	0.0285714	0	0.0340909	0	0.218182	0	0	0	0	0.00645161	0	0	0	0	0.028169	0.0222222
CGDMR	6020	Bd1-1	Bd1	52105000	52105199	199	hypo	0	0.0128205	1	0	1	0.959677	0.969957	0.0393701	0.0379747	0.722222	0	0.659722	0.639098	0.646825	0.00185874	0.00526316	0.00769231	0	0.00561798	0.00835655	0.0129241
CGDMR	6024	Bd1-1	Bd1	52121400	52121699	299	hypo	0.0307692	0.0307692	0.925926	0	0	0	0	0.0526316	0	0.354839	0	0.125	0	0	0.01	0.00454546	0.0265957	0	0.00892857	0.01	0.00348432
CGDMR	6030	Bd1-1	Bd1	52141700	52141899	199	hypo	0	0	0.954545	0	0	0.0909091	0.0526316	0.0384615	0	0.454545	NA	0	0	0.111111	0.00480769	0.0319149	0.0240964	0	0	0.0612245	0
CGDMR	6056	Bd1-1	Bd1	52316500	52316699	199	hyper	0.87931	0.823529	0	0	0	0.125	0	0.0125	0	0	0	0.0425532	0	0	0.0039267	0.0100671	0.0183486	0	0	0.00558659	0.0217391
CGDMR	6057	Bd1-1	Bd1	52316900	52317199	299	hyper	0.875817	0.609756	0	0.428571	0.105263	0.0869565	0.447059	0.0227273	0.00555556	0	0.0425532	0.04	0.031746	0.0168067	0.015625	0.00490998	0.00930233	0.00453515	0.00625	0.0084317	0.00441501
CGDMR	6060	Bd1-1	Bd1	52317900	52318299	399	hypo	0.0145773	0.0119617	0.932075	0.00706714	0.425	0.427984	0.81962	0.00518135	0.0131004	0.426117	0	0.3	0.354497	0.318637	0.00496032	0.00831947	0.0540827	0	0.0903226	0.233624	0.0117241
CGDMR	6062	Bd1-1	Bd1	52318600	52318899	299	hyper	0.881671	0.965517	0.0133333	0.962712	0	0.00719425	0.00357143	0.626126	0.755906	0.0434783	0.830882	0	0.0506329	0	0.00716332	0.0137615	0.0442478	0.0117096	0.0121212	0.0441176	0.0112676
CGDMR	6070	Bd1-1	Bd1	52354300	52354999	699	hyper	0.945055	0.858333	0.00934579	0.0136986	0.0263158	0.0163265	0.0118243	0.0298913	0.0495356	0.00840336	0	0.00909091	0.0103093	0.0204082	0.0135542	0.00295567	0.00570613	0	0.0220126	0.00678733	0.00527241
CGDMR	6071	Bd1-1	Bd1	52356400	52356599	199	hypo	0.115385	0.979592	0.911765	1	0.947368	0.916667	0.96	0.037037	0.84507	0.9375	0.888889	0.745098	0.837607	0.683673	0.018018	0.0187891	0.0104167	0	0.00775194	0.0156986	0.008
CGDMR	6078	Bd1-1	Bd1	52416700	52416999	299	hypo	0.0416667	0.392857	1	0.5	0.809524	0	0	0.0243902	0	0.0823529	0.25	0.129032	0	0	0	0.00970874	0	0	0	0.0392157	0
CGDMR	6079	Bd1-1	Bd1	52425600	52425899	299	hyper	0.96875	0.975	0.15	0.979592	0.904762	0.917808	0.439024	0.641566	0.844937	0.578512	0.811808	0.874539	0.825658	0.516279	0.0204678	0.010878	0.0211765	0.0216638	0.0185414	0.0195618	0.0114123
CGDMR	6081	Bd1-1	Bd1	52473500	52473699	199	hypo	0	0.181818	0.933333	0.111111	1	0.0285714	0	0	0.0392157	0.0625	0	0.0606061	0.0392157	0.0909091	0	0.00869565	0	0	0	0	0
CGDMR	6087	Bd1-1	Bd1	52486600	52486999	399	hyper	0.930889	0.892593	0	0.974834	0.00383142	0.00668896	0.0105932	0.234211	0.23918	0.00840336	0.421811	0	0.012987	0.00746269	0.00564972	0.00424628	0.0235294	0.00491159	0.00280899	0.00246305	0.00609756
CGDMR	6094	Bd1-1	Bd1	52567400	52567599	199	hypo	0	0.761905	0.928571	0.923077	0.936842	0.944444	0.756757	0	0.566667	0.590909	0.7	0.585366	0.5	0.5	0.0185185	0.0304183	0.0140845	0.0422535	0.0171821	0.00515464	0
CGDMR	6104	Bd1-1	Bd1	52650800	52651799	999	hyper	0.933474	0.0126206	0.0121951	0.00231482	0.0142487	0.964384	0.0102719	0.192862	0.0133745	0.0135364	0.0110294	0.0234114	0.233357	0.00808407	0.00910308	0.00782215	0.0167494	0.0113766	0.0113821	0.0152518	0.00744577
CGDMR	6105	Bd1-1	Bd1	52655600	52655799	199	hypo	0.0357143	0.969697	0.977273	NA	0.971014	0.7	0.102564	0.0384615	0.464516	0.408451	NA	0.557522	0.451613	0.0104167	0.00689655	0.00597015	0	NA	0.00689655	0	0.0176471
CGDMR	6107	Bd1-1	Bd1	52685500	52685699	199	hypo	0.0322581	0	0.882353	NA	NA	NA	0	0	0	0.5	NA	NA	NA	0	0	0	0.184211	NA	NA	NA	0
CGDMR	6108	Bd1-1	Bd1	52694400	52694599	199	hyper	0.923077	0.0125	0.03125	0.222222	0.139785	0.5	0	0.125	0.0571429	0	0	0.037037	0	0	0.0119048	0.00877193	0	0	0.0125786	0.0212766	0
CGDMR	6109	Bd1-1	Bd1	52696400	52696599	199	hypo	0.0175439	0.64	0.809524	0.892857	0.517241	0.857143	0.333333	0	0.0238095	0	0	0	0	0	0.00462963	0.00588235	0.0083682	0.0621118	0	0.046875	0.00429184
CGDMR	6112	Bd1-1	Bd1	52704700	52704899	199	hypo	0.125	0.781609	0.931818	0.65	0.879121	0.410959	0.423077	0	0.645161	0.6	0.333333	0.9	0.272727	0.487805	0.0123839	0.00511509	0.00680272	0.0190476	0.0165289	0.0289256	0.0475059
CGDMR	6124	Bd1-1	Bd1	52803600	52803799	199	hypo	0.157895	0.537313	0.9375	1	0.157895	0.54717	0	0.0793651	0.351852	0.52	0.666667	0.0689655	0.0909091	0.038961	0.00359712	0	0.0357143	0	0	0.0114286	0
CGDMR	6132	Bd1-1	Bd1	52879200	52879399	199	hypo	0	0	1	0	0	0.8	0	0	0	0	0	0	0	0	0	0.0277778	0	0	0	0	0
CGDMR	6134	Bd1-1	Bd1	52889700	52890299	599	hypo	0.00381679	0.974403	0.966527	0.0212766	0.957187	0.97482	0.974961	0.0114286	0.859649	0.931217	0.0943396	0.902542	0.799595	0.829099	0.00600601	0.0209231	0.0147256	0.0285714	0.0113895	0.0109318	0.02019
CGDMR	6135	Bd1-1	Bd1	52891100	52891999	899	hypo	0.0299401	0.950904	0.991489	0	0.962329	0.981982	0.985554	0.0288184	0.85119	0.806306	0.0833333	0.854503	0.819196	0.864	0.00433651	0.0141297	0.0239295	0.00793651	0.0308483	0.0230769	0.0218401
CGDMR	6136	Bd1-1	Bd1	52893200	52893799	599	hypo	0.0170732	0.97817	0.987842	0.923077	0.973039	0.963918	0.965007	0.0095057	0.641651	0.731959	0.351064	0.707207	0.708333	0.625581	0.00129702	0.0160214	0.0136054	0.0367347	0.0252809	0.043956	0.0407569
CGDMR	6138	Bd1-1	Bd1	52900200	52900699	499	hypo	0.0118483	0.969697	0.964912	0	0.971429	0.974596	0.971098	0.0123839	0.862974	0.666667	0	0.933628	0.872941	0.882105	0.0115546	0.0192661	0.0167598	0	0.0232558	0.00843558	0.0115533
CGDMR	6140	Bd1-1	Bd1	52905500	52905899	399	hypo	0.011236	0.0238095	0.92562	0.0740741	0.383085	0.966903	0.00970874	0.0194805	0.0106952	0.117241	0	0.0265487	0.709419	0.0223881	0.0219178	0.0194932	0	0	0.00383877	0.0126449	0.00655738
CGDMR	6142	Bd1-1	Bd1	52923400	52923599	199	hypo	0	0	1	NA	0	0.6	0.272727	0	0.015625	0.5	NA	0	0.32	0.368421	0.0103093	0	0.0140845	NA	0	0	0.18018
CGDMR	6143	Bd1-1	Bd1	52926900	52927099	199	hypo	0.0454545	0.982456	0.967742	0.974359	0.964912	0.970149	0.94	0.0213904	0.771654	0.785714	0.691358	0.68595	0.706294	0.672131	0.00721154	0.00760456	0.015748	0.00704225	0.0126582	0.0209059	0.0170213
CGDMR	6145	Bd1-1	Bd1	52933400	52933799	399	hypo	0.0142653	0.94375	0.977679	0.00826446	0.942073	0.966514	0.934679	0.0177215	0.5386	0.683333	0	0.638051	0.652174	0.651203	0.0123457	0.0399645	0.0406504	0	0.0358566	0.0499376	0.0265325
CGDMR	6153	Bd1-1	Bd1	52994900	52995399	499	hyper	0.92827	0.0151515	0	0.0169492	0.0467836	0	0.0331126	0.236246	0.00568182	0.0151515	0	0.0105263	0.0131579	0.0731707	0.0149953	0.0116086	0.015873	0.0152672	0.00502513	0.00865801	0.0052356
CGDMR	6157	Bd1-1	Bd1	53011400	53011599	199	hypo	0.0344828	0.5	0.888889	1	0.666667	0.6	0.454545	0.0141844	0	0	0	0	0.0212766	0	0	0.00465116	0	0	0	0	0.00970874
CGDMR	6158	Bd1-1	Bd1	53024000	53024199	199	hyper	0.990909	0	0	0	1	0	0.546512	0.542857	0.0243902	0	0	0	0	0	0.0056926	0	0	0	0	0	0
CGDMR	6162	Bd1-1	Bd1	53079700	53079899	199	hypo	0.0238095	0.0350877	0.927273	0	0.0243902	0	0	0	0	0.617647	0	0	0	0	0	0.00591716	0.03125	0	0.012987	0	0
CGDMR	6165	Bd1-1	Bd1	53097600	53097799	199	hypo	0.0169492	0.754098	0.9	0.608696	0.884615	0.482143	0	0.0140845	0.119048	0	0.0277778	0.204082	0.032967	0.0169492	0.0155642	0.00348432	0.00990099	0	0.00990099	0.0131926	0.00228833
CGDMR	6168	Bd1-1	Bd1	53109500	53109999	499	hypo	0.0412371	0.95935	0.883721	0.869565	0.977778	0.333333	0.606742	0.0108696	0.27572	0.302326	0.228571	0.277108	0.145161	0.0632911	0.0026455	0.00591716	0.028103	0	0.00205761	0.00342466	0.0052356
CGDMR	6172	Bd1-1	Bd1	53135400	53135599	199	hypo	0.0185185	0.32	0.965517	0	0	0	0	0.0434783	0.0163934	0.047619	0	0	0	0	0.00255755	0	0.00662252	0	0	0	0
CGDMR	6174	Bd1-1	Bd1	53136000	53136199	199	hypo	0	0.871795	0.933333	NA	0.9375	0	0	0.00884956	0.2	0.333333	NA	0.714286	0	0	0.0113122	0.0320856	0.0127389	NA	0	0	0
CGDMR	6182	Bd1-1	Bd1	53180000	53180699	699	hypo	0.020654	0.976062	0.97852	0.961798	0.954098	0.0100865	0.00902527	0.0510204	0.731973	0.801762	0.857143	0.815678	0.0192308	0.0138067	0.0566038	0.0519373	0.0561331	0.0206379	0.0100111	0.0127119	0.00303951
CGDMR	6187	Bd1-1	Bd1	53207000	53207199	199	hyper	0.834586	0.00891531	0.0240964	0.0125	0.0103627	0	0.00649351	0.452055	0.003125	0	0	0.00297619	0	0	0.00813008	0.00542005	0	0	0.002849	0.0128205	0.01
CGDMR	6188	Bd1-1	Bd1	53207300	53207599	299	hyper	0.967871	0.023913	0	0	0.0142857	0.010101	0.0233463	0.507143	0.0135747	0	0	0	0	0	0.0142857	0.00127877	0	0.0108696	0	0.0280899	0.0132626
CGDMR	6189	Bd1-1	Bd1	53207800	53207999	199	hypo	0	0.913043	0.958333	0.846154	0.791667	1	0.88	0	0.724638	0.756098	0.461538	0.555556	0.727273	0.805085	0.00574713	0.086262	0.0297619	0.171429	0.134328	0.0120482	0.0920245
CGDMR	6191	Bd1-1	Bd1	53217300	53217499	199	hypo	0.0197044	0.982116	0.982759	0.888651	0.97724	0	0.973815	0.00803213	0.582322	0.359756	0.344221	0.307836	0	0.474926	0.0070922	0.00559441	0.022831	0.00959693	0.0128535	0	0.0258718
CGDMR	6192	Bd1-1	Bd1	53217800	53217999	199	hypo	0	1	0.933333	NA	0.9	0	1	0.0384615	0.75	0.916667	NA	0.25	0	0.714286	0.0172414	0.0192308	0	NA	0	0	0
CGDMR	6193	Bd1-1	Bd1	53231600	53231999	399	hyper	0.925515	0.00826446	0.00872093	0.971545	0.02457	0.97061	0.0126743	0.461326	0.015873	0.00568182	0.344512	0.0238095	0.599026	0.0146341	0.0666667	0.00860215	0.0125523	0	0.00327869	0.0173536	0.00573614
CGDMR	6197	Bd1-1	Bd1	53246100	53246599	499	hypo	0.053913	0.982955	0.980057	0	0.974359	0.967177	0.98739	0.00921659	0.533333	0.458515	0	0.50348	0.471406	0.495327	0.00449944	0.00949367	0.014975	0.047619	0.00924025	0.00819062	0.0109204
CGDMR	6201	Bd1-1	Bd1	53264500	53264799	299	hypo	0.030303	0.970588	0.970149	0.909091	0.983871	0.75	0.977612	0.0153846	0.328	0.329114	0.181818	0.227545	0.0666667	0.16129	0.00480769	0.00829875	0.0322581	0.0333333	0.0248963	0.0078125	0.012
CGDMR	6206	Bd1-1	Bd1	53305500	53305999	499	hypo	0.0138298	0.958904	0.981132	0.974798	0.97429	0.00573066	0.972362	0.0131579	0.54295	0.613636	0.747012	0.674847	0.0228013	0.613037	0.0150094	0.017809	0.00980392	0.00918635	0.0126369	0.00612745	0.0100568
CGDMR	6207	Bd1-1	Bd1	53307900	53308399	499	hyper	0.96661	0.0118812	0.0344828	0.031405	0.00815661	0.991877	0.0142096	0.629742	0.00711744	0.0113636	0.0155642	0.00993378	0.893983	0.0208955	0.0131306	0.00652528	0.021645	0.00943396	0.0108893	0.0254425	0.00495868
CGDMR	6209	Bd1-1	Bd1	53324500	53324799	299	hyper	0.903846	0.104651	0.0322581	0.03125	0	0.0172414	0.0588235	0.556522	0.0545455	0	0.0588235	0.0285714	0	0.108696	0.00786517	0	0	0	0.0165289	0.0101351	0.003663
CGDMR	6213	Bd1-1	Bd1	53340300	53340499	199	hypo	0.166667	0.538462	1	0	0.272727	0.25	0.884615	0	0.222222	0.769231	0	0.166667	0	0.5	0.00510204	0.0606061	0.05	0.4	0.0175439	0	0.012987
CGDMR	6215	Bd1-1	Bd1	53352100	53352299	199	hyper	0.862559	0.915751	0.0163934	0.894737	0.0199005	0.0144231	0.023569	0.183333	0.20339	0	0.0806452	0	0.0107527	0	0.00757576	0.00664452	0.0111732	0.0123457	0.00591716	0	0
CGDMR	6218	Bd1-1	Bd1	53360300	53360499	199	hypo	0	1	0.941176	1	1	0	0.944444	0.133333	0.0769231	0.882353	0.1	0.545455	0	0.65	0	0.02	0.012987	0	0	0	0.0119048
CGDMR	6219	Bd1-1	Bd1	53360700	53361299	599	hypo	0.00694444	0	0.966102	1	0.990826	0.0348837	0.945946	0.0153846	0	0.841463	0.35	0.782787	0	0.663158	0.00537634	0.00909091	0.0169492	0.02	0.00748503	0	0.0108893
CGDMR	6221	Bd1-1	Bd1	53376200	53376999	799	hyper	0.939919	0.0151734	0.0193402	0.0331325	0.0167084	0.0171544	0.0185759	0.636731	0.0241343	0.030303	0.056338	0.0125523	0.037037	0.0509259	0.00810701	0.0300708	0.023976	0.0399361	0.0089955	0.03125	0.053745
CGDMR	6222	Bd1-1	Bd1	53377100	53377399	299	hyper	0.982051	0.0172414	0.0183486	0.0122699	0.0260417	0.00819672	0.0112782	0.353896	0	0.016129	0	0.00943396	0.00653595	0.0123457	0.00621891	0.0042735	0	0.0221239	0.0130293	0.0173913	0.0154799
CGDMR	6225	Bd1-1	Bd1	53386600	53386799	199	hypo	0	0	1	1	0	0	0	0	0	0.411765	1	NA	0	0	0	0	0.040404	0	NA	0	0
CGDMR	6230	Bd1-1	Bd1	53411900	53412399	499	hypo	0.00348432	0.9	0.954955	0.504132	0.969957	0.948339	0.900783	0	0.196721	0.269841	0.118644	0.371429	0.319444	0.395833	0.00201613	0.00810811	0.0356083	0.0218978	0.0245399	0.0227642	0.0117925
CGDMR	6235	Bd1-1	Bd1	53416000	53416699	699	hyper	0.968	0.0389484	0.0595903	0	0.0490884	0.00952381	0.00875273	0.546177	0.0122699	0.00410678	0.00925926	0.0189229	0.0113507	0.00549451	0.0143717	0.00360144	0.00438597	0.0022779	0.00651997	0.00526316	0.00431035
CGDMR	6243	Bd1-1	Bd1	53494500	53494899	399	hyper	0.906516	0	0.020202	0.00884956	0.00724638	0.0245902	0	0.025974	0.00787402	0.0138889	0	0.0280899	0.0327869	0	0.00948992	0	0	0	0.0037037	0.00645161	0.00306749
CGDMR	6244	Bd1-1	Bd1	53496000	53496299	299	hypo	0.00273224	0.878632	0.93299	0.854167	0.883436	0.903689	0.946918	0.00595238	0.44152	0.464286	0.53913	0.511111	0.383607	0.529086	0.00618557	0.0330296	0.0206422	0.0255474	0.0383838	0.0237099	0.0292581
CGDMR	6248	Bd1-1	Bd1	53565300	53565599	299	hypo	0.0366972	0	0.970588	0	0	0	0.027027	0.0116279	0	0.393939	0	0	0	0	0.0056338	0.0116959	0.0155039	0	0	0	0.00540541
CGDMR	6249	Bd1-1	Bd1	53565800	53565999	199	hypo	0.185185	0.116279	1	0.172414	0.567568	0.181818	0.1875	0.0769231	0.0454545	0.448276	0.125	0	0.103448	0	0.0181818	0.048951	0.0342857	0.00729927	0.0472441	0.0347222	0.0136986
CGDMR	6251	Bd1-1	Bd1	53570000	53570199	199	hypo	0.00900901	0.0776699	0.895238	0.00746269	0	0	0.00568182	0.00411523	0.0178571	0.0425532	0.03125	0.0121951	0	0	0	0.0105263	0.0380952	0.00877193	0	0.0105263	0.0127389
CGDMR	6252	Bd1-1	Bd1	53570900	53571199	299	hypo	0.0180412	0	0.965278	0.128205	0.952564	0.241379	0.05	0.00813008	0.0212766	0.345133	0.0714286	0.354037	0.0714286	0.0588235	0.0183824	0	0.0176211	0.0447761	0.0134357	0	0.047619
CGDMR	6254	Bd1-1	Bd1	53580800	53581199	399	hypo	0.122642	1	0.961165	NA	NA	1	1	0.00980392	NA	0.448276	NA	NA	0.5	NA	0.00496278	0	0.00343643	NA	NA	0	0
CGDMR	6255	Bd1-1	Bd1	53590300	53591199	899	hypo	0.0179558	0.903614	0.973684	0.895879	0.979104	0.910814	0.922772	0.00886525	0.398589	0.631285	0.192547	0.653982	0.500792	0.521028	0.00622665	0.0236111	0.0102421	0.00674157	0.0154679	0.0698975	0.0400314
CGDMR	6256	Bd1-1	Bd1	53602100	53602699	599	hypo	0.00322581	0.343042	0.942222	0.173913	0.0159363	0.243478	0.427027	0.00967742	0.149466	0.706468	0.0655738	0	0.224215	0.310056	0.0049505	0.0100604	0.0372549	0.00196464	0.00376884	0.0327103	0.013465
CGDMR	6258	Bd1-1	Bd1	53614500	53614899	399	hypo	0	0.765363	1	0.359551	0.930233	0.802721	0.831683	0.00527705	0.0141343	0	0	0.0143885	0.0195122	0.00546448	0.0146396	0.00769231	0.0030303	0.00576369	0.00713013	0.0070922	0.00597015
CGDMR	6264	Bd1-1	Bd1	53688500	53688699	199	hyper	0.947368	0.964286	0.0923077	1	0.847826	0.988889	0.969072	0.0649351	0.0232558	0	0.463415	0.065	0.204545	0.0406504	0.00705882	0.0104987	0.00696864	0.00773196	0.00799087	0.00138313	0.00683761
CGDMR	6270	Bd1-1	Bd1	53742300	53742699	399	hyper	0.925764	0.901961	0	0.7	0	0	0.935644	0.457944	0.450549	0.04	0.529412	0	0.0444444	0.540856	0.0138169	0.00916497	0	0.0181818	0	0.0176471	0.00753296
CGDMR	6271	Bd1-1	Bd1	53742800	53743099	299	hyper	0.929487	0.890141	0	0.976959	0.00847458	0	0.970149	0.585546	0.509653	0	0.658621	0.0138889	0.0232558	0.713178	0.0136519	0.0361727	0.0185185	0.00236967	0	0.0159363	0.0170293
CGDMR	6274	Bd1-1	Bd1	53764100	53764299	199	hypo	0.24	0.625	1	NA	1	NA	1	0	0.136364	0.125	0	0.333333	NA	1	0	0.0208333	0.0967742	0	0	NA	0.0833333
CGDMR	6275	Bd1-1	Bd1	53766400	53766799	399	hypo	0	0.244898	0.931818	0.714286	0.612903	0	0.314286	0.0169492	0.0243902	0	0.333333	0	0	0.0909091	0.0117647	0.0026178	0.0114068	0	0	0	0.0119048
CGDMR	6279	Bd1-1	Bd1	53784700	53784999	299	hyper	0.961806	0.00735294	0.011236	0	0.0625	0.00869565	0	0.694444	0.0181269	0.0309278	0.0833333	0.0108696	0.0105634	0.00323625	0.016692	0.00611621	0.00571429	0	0	0.0198676	0.00318471
CGDMR	6285	Bd1-1	Bd1	53831600	53831799	199	hypo	0.0111732	0	0.789474	0.0425532	0.727273	0	0.0212766	0.00793651	0.0198676	0.308824	0	0.302326	0.0125786	0.0231214	0.0103567	0.0127737	0.0185185	0	0.00408163	0.00684931	0.00608828
CGDMR	6286	Bd1-1	Bd1	53836500	53836699	199	hypo	0	NA	0.965517	NA	0.939394	NA	NA	0	NA	1	NA	0.767123	NA	NA	0.00414938	NA	0	NA	0.0350877	NA	NA
CGDMR	6287	Bd1-1	Bd1	53838400	53838699	299	hypo	0.0434783	NA	0.956989	NA	0.976378	1	NA	0.0479452	NA	0.646552	NA	0.756579	1	NA	0.0242086	NA	0.00224215	NA	0.00179533	0.75	NA
CGDMR	6288	Bd1-1	Bd1	53853600	53853799	199	hypo	0	0.867769	0.951456	0.965174	0.986842	0.896266	0.936255	0.0205761	0.246622	0.110236	0.380734	0.188235	0.421233	0.353896	0	0.0392157	0.0483871	0.0311111	0.0105263	0.0498442	0.0383275
CGDMR	6290	Bd1-1	Bd1	53866400	53866999	599	hypo	0.0111111	0	0.968254	0	0.97619	0.0126582	0.0444444	0.00411523	0.00970874	0.711207	0.0526316	0.512397	0	0.0423729	0.00397878	0.0106838	0.0266272	0.0114943	0.0134003	0.0126582	0.00729927
CGDMR	6295	Bd1-1	Bd1	53918800	53919099	299	hypo	0.0217391	0.988048	0.964286	0.991304	0.976562	0.981013	0.964467	0.0169492	0.839806	0.893204	0.801858	0.728543	0.768627	0.841718	0.0083682	0.00914205	0.00497512	0.0117647	0.0180624	0.01	0.0155682
CGDMR	6304	Bd1-1	Bd1	53978000	53978799	799	hypo	0.0162003	0.0194903	0.987597	0	0.0151976	0.046252	0.0771429	0.0158228	0.00766283	0.287554	0	0.00558659	0.0165975	0.00761905	0.0194265	0.0040858	0.011194	0.00188679	0.00732064	0.00472813	0.00691017
CGDMR	6305	Bd1-1	Bd1	53978900	53979199	299	hypo	0.017094	0.0167224	0.990741	0	0	0.0189873	0.027933	0.0116279	0.00719425	0.472527	0	0	0.0178571	0.0147059	0.0041841	0.0134228	0.022831	0	0	0.00819672	0.00689655
CGDMR	6308	Bd1-1	Bd1	53987900	53988599	699	hyper	0.965802	0.00775194	0.012844	0.00480769	0.0171625	0.0164384	0.0189329	0.492929	0.022779	0	0.0176471	0.0330033	0.0183727	0.0340136	0.0169348	0.00642674	0.0130208	0.0129032	0.0304762	0.028065	0.0574468
CGDMR	6309	Bd1-1	Bd1	53989300	53989699	399	hyper	0.976323	0.00720288	0.0181818	0.00609756	0.984305	0.00636943	0.00559702	0.195329	0.00925926	0.0126582	0.00952381	0.43088	0.016	0.00970874	0.0093633	0.00550964	0.0037037	0.00334448	0.0386428	0.0078329	0.00184502
CGDMR	6310	Bd1-1	Bd1	53991200	53991499	299	hypo	0.048	0.0714286	0.802083	0	0.0888889	0.811502	0.198276	0	0.0537634	0.217391	0	0	0.125561	0.057971	0.0110294	0.0211864	0	0	0	0.00529801	0.00970874
CGDMR	6312	Bd1-1	Bd1	54003200	54004099	899	hypo	0.0362622	0.911473	0.978437	0.905841	0.0324963	0.94938	0.921969	0.0142276	0.330189	0.391982	0.277325	0	0.510484	0.459259	0.0045819	0.0542532	0.0916976	0.00346021	0.00371057	0.037173	0.0123839
CGDMR	6313	Bd1-1	Bd1	54013200	54013699	499	hyper	0.966041	0.00829875	0.0206897	0.0116279	0.949829	0.0153846	0.00368324	0.692437	0.00662252	0	0.015	0.801624	0.0183486	0.0113895	0.0201689	0.00307692	0	0.00304878	0.0123377	0.0034965	0.00818554
CGDMR	6315	Bd1-1	Bd1	54014000	54014199	199	hyper	0.932203	0	0	0	1	0	0	0.838384	0	0	0	0.981818	0	0	0.0176125	0	0	0	0.0380952	0	0.0138889
CGDMR	6317	Bd1-1	Bd1	54019400	54019799	399	hyper	0.851582	0.00490196	0.037037	0	0.962617	0.0163934	0.00299401	0.486726	0.00598802	0.030303	0	0.443182	0.0169492	0.0131579	0.0334101	0.00739645	0	0	0.0221774	0.00881057	0.00808081
CGDMR	6320	Bd1-1	Bd1	54031100	54031699	599	hyper	0.973458	0.0114548	0.00566572	0.0121107	0.957968	0.012605	0.0982609	0.591658	0.0169492	0.00888889	0.00295858	0.683844	0.00755667	0.117211	0.022339	0.00657895	0.00289017	0	0.00908456	0.00814664	0.0705191
CGDMR	6321	Bd1-1	Bd1	54040400	54041099	699	hypo	0.0370774	0.965385	0.968944	0.970725	0.0303514	0.85548	0.855388	0.0204082	0.621981	0.675057	0.697232	0.0227273	0.541126	0.58	0.00695825	0.014553	0.0106141	0.013663	0.00325733	0.021978	0.0107932
CGDMR	6322	Bd1-1	Bd1	54043600	54044099	499	hyper	0.919922	0.00369686	0.00826446	0.0077821	0.97065	0.00483092	0.00952381	0.288754	0	0.0178571	0.0217391	0.163347	0.0186335	0.00784314	0.0165837	0.0100503	0.00358423	0.011236	0.0117647	0.00318471	0.00539568
CGDMR	6327	Bd1-1	Bd1	54096800	54096999	199	hypo	0.0133333	0	0.939394	0.882353	0.958333	0.957746	0.971429	0.031746	0	0.387097	0.466667	0.571429	0.461538	0.411111	0	0.00568182	0.0571429	0	0.00862069	0.0177305	0.0116732
CGDMR	6328	Bd1-1	Bd1	54099000	54099199	199	hyper	0.872727	0.296296	0	NA	0.25	0	0.444444	0	0	0	NA	0	0.0625	0.0769231	0.0220994	0	0	NA	0	0.0869565	0
CGDMR	6332	Bd1-1	Bd1	54158600	54159299	699	hyper	0.923513	0.0070922	0.0335196	0	0.00995025	0.013986	0.00423729	0.362437	0.00226757	0.00854701	0.012766	0.0148515	0.0043956	0.013369	0.00828729	0.00203459	0	0.0058997	0.00849858	0.0131435	0.00263852
CGDMR	6335	Bd1-1	Bd1	54190000	54190199	199	hypo	0	0	0.866667	0.6	0.846154	0.875	0.875	0.0422535	0	0.037037	0	0.027027	0	0	0.00859599	0	0.0152672	0.0078125	0.00414938	0	0.00925926
CGDMR	6338	Bd1-1	Bd1	54202200	54202599	399	hypo	0.0248963	0.974155	0.97931	0.966292	0.0113636	0.939623	0.977848	0.00487805	0.416268	0.700787	0.233577	0	0.301508	0.0110701	0.00506757	0.00630063	0.0106101	0	0.00896861	0.00950735	0.00497512
CGDMR	6340	Bd1-1	Bd1	54203600	54203999	399	hypo	0	0.78341	0.966667	0.911765	0.883721	0.970803	0.840909	0	0.0523256	0.0898876	0.060241	0.165414	0.0967742	0.035503	0.00207469	0.00337268	0	0.00775194	0.0397554	0.0103093	0
CGDMR	6342	Bd1-1	Bd1	54205100	54205799	699	hyper	0.931792	0.00882724	0.0122449	0.00335571	0.01	0.00575816	0.00452489	0.022069	0.0187207	0.00581395	0.0267857	0.022831	0.0158103	0.00958904	0.00604933	0.00478142	0.00746269	0.0179558	0.00789177	0.00615114	0.00523865
CGDMR	6343	Bd1-1	Bd1	54205900	54206299	399	hyper	0.91195	0.0132275	0	0.037037	0.00900901	0	0.034749	0.0188953	0.00959693	0.00917431	0	0.00641026	0	0.00571429	0.00885559	0.00457457	0.0202429	0.0428571	0.0164384	0	0.00384615
CGDMR	6349	Bd1-1	Bd1	54237600	54238099	499	hypo	0.045977	0.976842	0.99711	0.990458	0.985027	0.979914	0.973196	0.0229885	0.589988	0.713376	0.621359	0.722222	0.607664	0.567332	0.00769231	0.0055788	0.0147493	0.00209644	0.00875657	0.0075594	0.0541422
CGDMR	6351	Bd1-1	Bd1	54251300	54251999	699	hypo	0.00595238	0.973267	0.993865	0.977989	0.974337	0.968342	0.962406	0.0070028	0.700774	0.725191	0.747414	0.683782	0.668737	0.754767	0.00938233	0.0104895	0.0112812	0.0193798	0.00964187	0.00779727	0.0112174
CGDMR	6358	Bd1-1	Bd1	54265100	54265299	199	hyper	0.939698	0.939891	0	0.944162	0.919414	0	0	0.504505	0.238938	0	0.225225	0.236686	0	0	0.062963	0.0238095	0.0147059	0.054878	0.0148148	0.0105263	0.0222222
CGDMR	6362	Bd1-1	Bd1	54280000	54280299	299	hypo	0.0224719	0.844828	0.988372	0	0.989691	0.985507	0.960352	0.0461538	0.337079	0.625	0	0.679245	0.637255	0.693878	0.00444444	0.0247191	0	0	0.0150376	0.0111732	0.0266106
CGDMR	6363	Bd1-1	Bd1	54299500	54299699	199	hyper	0.784483	0.0132743	0.0267857	0.0416667	0.0078125	0.00625	0.00666667	0.0224215	0.0128205	0	0.0188679	0.00724638	0.0119048	0.00613497	0.0153846	0.00421053	0	0.0175439	0.011583	0.00704225	0.00331126
CGDMR	6368	Bd1-1	Bd1	54341700	54341999	299	hypo	0.00502513	0.958904	0.915254	0.928058	0.988571	0.882759	0.932806	0.0160428	0.0150754	0	0.0915033	0.00438597	0.0138889	0.0132159	0.00185529	0.0139211	0.0190114	0.00348432	0.010582	0	0.0175747
CGDMR	6369	Bd1-1	Bd1	54342200	54342399	199	hypo	0	0.970149	0.977273	0.942857	0.978102	0.945355	0.942149	0.00684931	0.00716846	0.00952381	0.0136986	0.0289855	0.0161943	0.0150754	0.00623053	0.00207469	0.00507614	0.00383142	0.0101695	0.0123762	0.0104167
CGDMR	6370	Bd1-1	Bd1	54366500	54366699	199	hypo	0.0126582	0.973913	0.979167	1	0.976744	0.986842	1	0.0263158	0.764151	0.891304	0.74359	0.883721	0.964912	0.931818	0.0272727	0.0600522	0.0555556	0.0333333	0.0429448	0.0275862	0.0440771
CGDMR	6371	Bd1-1	Bd1	54377800	54378099	299	hypo	0.0216216	0.966667	0.995283	0.974093	0.985207	0.968	0.977586	0.00662252	0.820961	0.803681	0.834586	0.860759	0.792453	0.77381	0.00626305	0.0110294	0.00610998	0.0267686	0.00965018	0.0178174	0.00814815
CGDMR	6382	Bd1-1	Bd1	54490700	54490899	199	hypo	0	0.957265	0.947368	NA	0.952381	0.924051	0.978947	0	0.150943	0.153846	NA	0.166667	0.189189	0.317073	0	0.00507614	0	NA	0	0	0.0211268
CGDMR	6383	Bd1-1	Bd1	54491000	54491499	499	hypo	0.0203562	0.97237	0.965164	NA	0.950512	0.975892	0.965517	0.0118765	0.510851	0.582363	NA	0.600601	0.633188	0.68131	0.0141304	0.00986121	0.0102339	NA	0.0151206	0.0107287	0.00884956
CGDMR	6384	Bd1-1	Bd1	54497900	54498299	399	hyper	0.970588	0.0857143	0	0.932432	0	0.910448	0.940959	0.468165	0	0.0133333	0.690476	0.047619	0.643052	0.662551	0.0257143	0.00687285	0.00478469	0.0246154	0.0254237	0.0292929	0.00352361
CGDMR	6388	Bd1-1	Bd1	54513300	54513599	299	hypo	0.0102389	0.00377358	0.8375	0.0188679	0.00657895	0.056701	0.107914	0.0128755	0.0125786	0.0166667	0	0	0	0	0.00941915	0.00804829	0	0	0.00341297	0.00705882	0
CGDMR	6392	Bd1-1	Bd1	54539300	54539499	199	hyper	0.896907	0.0186335	0	0.854545	0.0277778	0.534483	0.476471	0.010929	0.0136054	0.037037	0.0217391	0	0.0338983	0.0680272	0.0230126	0.00947867	0	0.0208955	0.0204082	0.00571429	0.00238095
CGDMR	6393	Bd1-1	Bd1	54546500	54546699	199	hyper	0.89916	0	0	NA	NA	0.0666667	0	0.227273	0	0	NA	NA	0	0	0.0140351	0	0	NA	NA	0	0
CGDMR	6395	Bd1-1	Bd1	54647400	54647899	499	hypo	0.0993377	0.961484	0.988372	NA	0.989831	0.960557	0.964613	0.0601336	0.679487	0.671429	NA	0.561224	0.728097	0.634328	0.00168919	0.0154799	0	NA	0.0162866	0.0100503	0.00390244
CGDMR	6396	Bd1-1	Bd1	54648000	54648399	399	hypo	0.102975	0.965732	0.989011	NA	0.961883	0.973875	0.975217	0.0851064	0.612637	0.590164	NA	0.662252	0.563177	0.534884	0.0103806	0.0144168	0.0185185	NA	0.011583	0.00609756	0.015493
CGDMR	6410	Bd1-1	Bd1	54765500	54765799	299	hypo	0.0481928	0.760956	0.936782	0.668712	0.898785	0.736402	0.924765	0.0208333	0.0659341	0.341969	0.162162	0.326316	0.139373	0.28841	0.00943396	0.00339367	0.00597015	0.0132013	0.0213068	0.0124352	0.00489796
CGDMR	6411	Bd1-1	Bd1	54782800	54784199	1399	hyper	0.967634	0.959044	0.0130293	0.954403	0.96769	0.977507	0.987179	0.0355086	0.188235	0.00277778	0.144404	0.0545455	0.0885965	0.169492	0.00905155	0.00740741	0.00353357	0.00873587	0.00981912	0.0111359	0.0096332
CGDMR	6413	Bd1-1	Bd1	54807300	54807499	199	hypo	0.0590406	0.84507	0.894444	0.874372	0.796034	0.00862069	0.922807	0.0165746	0.00941915	0.014652	0.0128205	0.0103627	0.014245	0.0192719	0.008	0.0102157	0.00719425	0.0122951	0.00282486	0.00656455	0.00811688
CGDMR	6414	Bd1-1	Bd1	54809000	54809299	299	hypo	0.0136054	0.964824	0.873874	0.970588	0.995327	0.904943	0.960289	0.010989	0.723214	0.415094	0.614458	0.402299	0.820144	0.791411	0.00659341	0.016158	0.0125	0.0418605	0.0125313	0.030303	0.0191176
CGDMR	6415	Bd1-1	Bd1	54809600	54810899	1299	hyper	0.942749	0.0147059	0.00398936	0.00771208	0.0350877	0.0221643	0.00295858	0.542081	0.0107527	0.0120482	0.00614754	0.0136674	0.00313972	0	0.0237441	0.00882724	0.00536673	0.0105871	0.00671141	0.0136546	0.00244898
CGDMR	6418	Bd1-1	Bd1	54819200	54819399	199	hyper	0.944444	NA	0	NA	NA	NA	0	0.480769	NA	0	NA	NA	NA	0	0.0136364	0	0	NA	NA	NA	0
CGDMR	6422	Bd1-1	Bd1	54916900	54917599	699	hypo	0.0101523	0.923729	0.968215	0.978261	0.936426	0.979564	0.97513	0.0109091	0.732198	0.794212	0.847534	0.760204	0.84991	0.751625	0.015083	0.0615727	0.0160772	0.0298969	0.043787	0.0793522	0.0630631
CGDMR	6429	Bd1-1	Bd1	54950100	54950599	499	hyper	0.939431	0.939203	0.0451128	0.984127	0.958291	0.957709	0.977881	0.709581	0.645094	0.0357143	0.683502	0.707865	0.722846	0.738667	0.00870196	0.01078	0.0116822	0.017094	0.0140252	0.00692226	0.00655152
CGDMR	6430	Bd1-1	Bd1	54951200	54951399	199	hypo	0	0.928571	1	0.5	0.863636	0.818182	0.9	0.0526316	0.5	0.933333	0.714286	0.529412	0.695652	0.5	0	0.05	0	0.105263	0.0487805	0.0847458	0
CGDMR	6442	Bd1-1	Bd1	55077800	55078099	299	hypo	0.00980392	0.0229008	0.989362	0	0.0166667	0.0277778	0.00609756	0.0126582	0.0333333	0.333333	0	0	0.0227273	0.017094	0.0181159	0.00623053	0.0533333	0.00775194	0.0335196	0.026455	0.0356234
CGDMR	6445	Bd1-1	Bd1	55134500	55134699	199	hyper	0.909091	0.659574	0	0.0454545	0.35	0.92517	0.415094	0.434783	0.248555	0	0.0149254	0.111111	0.367816	0.165414	0.00420168	0.00954654	0.01	0.015873	0	0.00787402	0.00634921
CGDMR	6446	Bd1-1	Bd1	55144200	55144499	299	hypo	0.0209974	0.587983	0.803279	0.0714286	0.535461	0.331492	0.102564	0.0124611	0.239044	0.335938	0.0408163	0.128028	0.0595238	0.0430108	0.030086	0.0551053	0.0842105	0.00813008	0.00839329	0.0299401	0.0267215
CGDMR	6448	Bd1-1	Bd1	55146000	55146199	199	hyper	0.905172	0.00877193	0.0227273	0	0.0299728	0.0163265	0.0109091	0.647619	0.0132159	0	0.0108696	0.0173913	0.00564972	0.005	0.00738007	0.0070922	0	0.00917431	0.00756144	0	0.012931
CGDMR	6451	Bd1-1	Bd1	55149100	55149699	599	hypo	0.0135747	0.961462	0.975232	0.00476191	0.800429	0.959294	0.968102	0.0227273	0.421708	0.51	0	0.267925	0.569507	0.585427	0.00535906	0.0130548	0.004914	0	0.00631912	0.0147203	0.00829016
CGDMR	6452	Bd1-1	Bd1	55149800	55149999	199	hypo	0.0599369	0.870066	0.860465	0.0103093	0.919414	0.885942	0.708791	0	0.16	0.0566038	0.0943396	0.22695	0.119617	0.0273632	0.00569801	0.0064	0.0212766	0.0194175	0.0546075	0.00537634	0.00658761
CGDMR	6455	Bd1-1	Bd1	55162900	55163299	399	hyper	0.937581	0.902616	0.00282486	0.880914	0.0316781	0.0166229	0.00910596	0.0899083	0.0676983	0.00465116	0.0774648	0.029985	0.00737463	0.0145349	0.0474684	0.0131004	0	0	0.0377358	0.00632911	0
CGDMR	6460	Bd1-1	Bd1	55191900	55192099	199	hypo	0	0.915094	0.959677	NA	0.993289	0.911243	0.963235	0	0.597484	0.772727	NA	0.761194	0.651786	0.665094	0.034188	0.0115207	0.00290698	NA	0.027027	0.016129	0.0158451
CGDMR	6465	Bd1-1	Bd1	55242000	55242699	699	hypo	0.00163399	0.918505	0.931723	0.937188	0.917929	0.892545	0.920613	0	0.317322	0.257075	0.27027	0.32868	0.18661	0.323436	0.00383142	0.0139423	0.0112631	0.0203327	0.00904234	0.0162465	0.0138333
CGDMR	6467	Bd1-1	Bd1	55246600	55247099	499	hyper	0.927273	0.0472103	0.0596026	0.1875	0.031746	0.0434783	0.0561404	0.282828	0.0240385	0.0729927	0.0526316	0.00787402	0.0388889	0.0409836	0.0194076	0.0111483	0.0174081	0	0.0108696	0.00972447	0.00569801
CGDMR	6469	Bd1-1	Bd1	55271200	55271399	199	hypo	0	0	0.930233	0	0.884615	0.434783	0.851852	0	0	0	0	0	0	0	0	0.0070922	0.0248447	0	0.0235294	0	0.02
CGDMR	6479	Bd1-1	Bd1	55330500	55330999	499	hypo	0.0116732	0.981221	0.973357	0.0127796	0.974257	0.971487	0.981912	0.0290698	0.775047	0.739766	0	0.811594	0.773157	0.808028	0.0143885	0.00528821	0.0479505	0.0105263	0.0133715	0.0736354	0.0721703
CGDMR	6482	Bd1-1	Bd1	55352400	55352699	299	hyper	0.964158	0.0116279	0.030303	0	0.974684	0.0052356	0.941176	0.794606	0.011194	0.00787402	0.0176991	0.311392	0.0537975	0.569794	0.011474	0.010279	0.00666667	0.0122951	0.0027881	0.00532623	0.00808625
CGDMR	6485	Bd1-1	Bd1	55363900	55364299	399	hyper	0.952542	0	0.00859599	0.97479	0.0208333	0.00210305	0.00353774	0.751381	0.00178253	0.00454546	0.814596	0.0137363	0.00896057	0.00813008	0.0139263	0.00611621	0.00423729	0.0155865	0.00664452	0.0070237	0.0140237
CGDMR	6492	Bd1-1	Bd1	55429600	55429999	399	hypo	0.0030581	0.00309597	0.994681	0	0.962963	0.95641	0	0.00456621	0	0.566038	0	0.554217	0.194444	0	0.00759494	0.00319489	0.00954654	0	0.0137363	0.01983	0
CGDMR	6493	Bd1-1	Bd1	55430800	55431099	299	hypo	0.0421053	0.922222	0.967949	0	0.98513	0.724138	0.969027	0.0282486	0.594315	0.754545	0	0.807595	0.237668	0.312704	0.003861	0.00444444	0.0136986	0.00671141	0.00956938	0.0049505	0.00131406
CGDMR	6498	Bd1-1	Bd1	55455600	55456299	699	hyper	0.914072	0.924033	0.00444444	0.890511	0	0.00383142	0.00573066	0.032491	0.024032	0.012	0.0523013	0.0120482	0.0280374	0.00815217	0.0179325	0.00697837	0.00757576	0.00776053	0.00530504	0.00148368	0.00345622
CGDMR	6499	Bd1-1	Bd1	55456500	55456699	199	hyper	0.903226	0.90604	0	0.947368	0	0.0610687	0	0.0364742	0.00444444	0.025641	0.0212766	0	0	0	0.00884956	0.00912409	0.0126582	0.00840336	0.0144928	0.00362319	0.00655738
CGDMR	6500	Bd1-1	Bd1	55456800	55457699	899	hyper	0.888092	0.869121	0.0123457	0.783217	0.0104712	0.0132159	0.0156863	0.0165531	0.0100719	0.00862069	0.0414508	0	0.01	0.00715308	0.00872886	0.00720461	0.00809717	0.0110803	0.00702988	0.00782779	0.00976909
CGDMR	6501	Bd1-1	Bd1	55458000	55458299	299	hyper	0.960474	0.00793651	0	0.854167	0	0	0.192857	0.0512048	0	0	0.025	0	0	0	0.00578035	0.00431035	0.010101	0	0.0097561	0	0.00355872
CGDMR	6502	Bd1-1	Bd1	55485800	55485999	199	hyper	0.909091	1	0	0.166667	1	1	1	0.722222	0.78169	0	0.0769231	0	0.034188	0	0.00809717	0.0115607	0	0	0	0.00943396	0
CGDMR	6503	Bd1-1	Bd1	55486200	55486399	199	hyper	0.978417	0.981707	0	0	0.764706	0.969697	0.790123	0.598485	0.625	0	0	0	0.0172414	0.0246914	0.00902527	0.0069808	0.0131579	0	0.0296296	0.0305677	0.00651466
CGDMR	6504	Bd1-1	Bd1	55486900	55487099	199	hyper	1	1	0	NA	0.6	1	0.875	0.349057	0.558559	0	NA	0	0.266667	0.464286	0.0218487	0.00702988	0	NA	0	0	0.00621118
CGDMR	6505	Bd1-1	Bd1	55487200	55487699	499	hyper	0.929889	0.968338	0	0.0561798	0.894737	0.930348	0.97546	0.0712589	0.663317	0	0.0238095	0.0380952	0.0355987	0.269017	0.0109562	0.00868056	0.00858369	0.0119048	0.00666667	0.00174825	0.00217628
CGDMR	6512	Bd1-1	Bd1	55496300	55496999	699	hypo	0.00478469	0	0.941176	0	0.99308	0.947955	0.971264	0.0171306	0.017341	0.019305	0.0241935	0.0105263	0.00301205	0.0090703	0.00559105	0.00344432	0.00317965	0	0.00201005	0.00308008	0.00683177
CGDMR	6513	Bd1-1	Bd1	55497100	55497299	199	hypo	0.0116279	0.017316	1	0	0.987578	0.889447	0.962121	0	0.010582	0.00892857	0	0.0263158	0.0233645	0.00740741	0.00449438	0.00483092	0	0	0.00396825	0.011236	0.00860215
CGDMR	6515	Bd1-1	Bd1	55504600	55504899	299	hypo	0.0273973	0	1	1	1	0.833333	0.981651	0	0	0.434783	0.666667	0.76	0.637681	0.655738	0.0261438	0.0526316	0.123077	0	0.0909091	0.287356	0.0347222
CGDMR	6516	Bd1-1	Bd1	55505100	55505799	699	hypo	0.0247748	0.0393082	0.979167	0.955752	0.969423	0.971698	0.964863	0.0238095	0.0250696	0.65614	0.751825	0.678803	0.604037	0.661422	0.00977654	0.004329	0.00843558	0.0351377	0.016921	0.0115924	0.0670342
CGDMR	6520	Bd1-1	Bd1	55539400	55539599	199	hypo	0	0.607843	0.827586	0.958333	0.976744	0	0.935065	0.00617284	0.01	0.0526316	0	0	0	0	0.00555556	0.0119048	0.00961539	0	0	0	0
CGDMR	6523	Bd1-1	Bd1	55566100	55566399	299	hyper	0.986792	0.914773	0.030303	0	0.0213675	0	0.028169	0.301887	0.680135	0.00724638	0.0232558	0.00446429	0.0180723	0.035533	0.0183086	0.0240964	0.00340136	0	0.00929368	0.0144928	0.00680272
CGDMR	6528	Bd1-1	Bd1	55618000	55618299	299	hyper	0.973597	0.0519481	0.0131579	0.01	0.0030303	0.0177778	0.0163934	0.105882	0	0	0	0.0229008	0.0186335	0	0.00955414	0	0.0681818	0	0.00359712	0.0045045	0.00949367
CGDMR	6529	Bd1-1	Bd1	55630200	55630399	199	hypo	0	0	0.967742	0	0.756757	0	0.0263158	0.015873	0	0.241379	0.1	0.148936	0.03125	0.0384615	0	0.00666667	0	0	0.00769231	0	0
CGDMR	6530	Bd1-1	Bd1	55632300	55632499	199	hypo	0.0555556	0.25	0.944444	0.913043	1	0.96	0.988095	0.0243902	0.0666667	0.674419	0.846154	0.0833333	0.313433	0.558333	0	0	0.0387597	0.01	0	0	0.00813008
CGDMR	6534	Bd1-1	Bd1	55672500	55673399	899	hypo	0.00600601	0.00176367	0.981319	0.0144033	0.970526	0.973637	0.00326442	0.00686499	0.00712589	0.666667	0.00230947	0.646247	0.607817	0.00535475	0.0111821	0.00559702	0.0140845	0.00277008	0.0146461	0.0300197	0.0102171
CGDMR	6535	Bd1-1	Bd1	55676400	55676699	299	hypo	0	0	0.921053	0.848485	0.954545	0.893333	0.970297	0	0.027027	0.6	0.5	0.352941	0.380952	0.47619	0	0.00362319	0.0583333	0.0535714	0	0.0466102	0.0434783
CGDMR	6536	Bd1-1	Bd1	55677200	55677399	199	hyper	0.952618	0	0	0	0.962185	0.0465116	0	0.561753	0	0	0	0.607843	0.030303	0	0.0163743	0	0	0	0.0177134	0	0.0381471
CGDMR	6538	Bd1-1	Bd1	55687400	55687599	199	hypo	0	0.84	0.985294	0.965957	0.943038	0.938272	0.89899	0	0.0588235	0.257143	0.100877	0.165254	0.127946	0.0640394	0.0106383	0.0149813	0.026764	0.00551471	0.0460123	0.00509684	0.00617284
CGDMR	6540	Bd1-1	Bd1	55692200	55692499	299	hypo	0.0958904	0.0785714	0.886076	0.819048	0.830357	0.666667	0.863905	0.0169492	0.0277778	0.163934	0.101695	0.192771	0.148148	0.226891	0.00617284	0	0	0	0.0178571	0.034188	0.225434
CGDMR	6551	Bd1-1	Bd1	55758100	55758299	199	hyper	0.789474	0.733333	0	0	0	0	0	0.111111	0	0.333333	NA	0	0	0	0.0210526	0.0138889	0.0240964	0	0	0	0.0169492
CGDMR	6557	Bd1-1	Bd1	55800900	55801099	199	hyper	0.9375	1	0	1	1	0.947368	1	0.275862	0.296296	0	0.666667	0.1875	0.114754	0	0.0147059	0.00884956	0	0	0.222222	0.023622	0.0285714
CGDMR	6563	Bd1-1	Bd1	55835200	55835799	599	hyper	0.919656	0.00949797	0	0	0.00571429	0.00793651	0.008	0.474522	0.0186567	0	0	0	0.0049505	0	0.0126866	0.00489237	0.00260417	0.00913242	0.0017094	0.0114504	0.0110063
CGDMR	6564	Bd1-1	Bd1	55839900	55840099	199	hypo	0.0465116	0	0.909677	0	0	0	0.00436681	0.138889	0.018018	0.418605	0.0357143	0.0208333	0.019802	0	0	0.00315457	0	0.02	0.008	0.00409836	0.00649351
CGDMR	6568	Bd1-1	Bd1	55874300	55874599	299	hypo	0.0175439	0.950617	0.981818	0.962963	0.985294	1	1	0.0070922	0.147727	0.1	0.333333	0.326923	0.22549	0.362745	0.0123267	0.00713013	0.00294985	0.0126904	0.0108527	0.00974659	0.00491803
CGDMR	6569	Bd1-1	Bd1	55876100	55876699	599	hypo	0.0121065	0.969116	0.983444	0.990442	0.942211	0.953108	0.969697	0	0.333996	0.376344	0.515873	0.312941	0.337711	0.364937	0.00215983	0.00643382	0.00744417	0.00952381	0.00688976	0.00423729	0.0133758
CGDMR	6570	Bd1-1	Bd1	55877000	55877199	199	hypo	0.0185185	0.764706	0.928571	1	0.846154	1	0.887097	0	0	0.0243902	0	0	0.113636	0.025641	0	0	0.0124224	0	0.0130719	0.0136054	0.00314465
CGDMR	6576	Bd1-1	Bd1	55906200	55906599	399	hypo	0.0118694	0.150538	0.9447	0.206667	0.245714	0.382775	0.25784	0.0645161	0.175793	0.471963	0.294931	0.197309	0.354167	0.247863	0.00872818	0.0206327	0.00917431	0	0.00204918	0.0136986	0.00890869
CGDMR	6577	Bd1-1	Bd1	55917700	55917999	299	hypo	0.106007	0.0483271	0.9	0	0.142857	0.0691489	0.0784314	0.079602	0.0416667	0.152174	0.0898876	0.196581	0.0775194	0.0952381	0.0013245	0.0021097	0.00952381	0.0110803	0.0225989	0.00784314	0.0120968
[truncated: 73,357 more rows]
