# Supplementary material for: DNA methylation profiles of diverse Brachypodium distachyon align with underlying genetic diversity
Source: Genome Res. 2016 Nov;26(11):1520–31. doi: 10.1101/gr.205468.116 (PMC5088594; doi:10.1101/gr.205468.116)
Supplement: Supplemental Material [file supp_gr.205468.116_Supplemental_Table_3.xlsx]

## Sheet: Sheet1
Supplemental Table 3: List of CHH Differentially Methylated Regions
class	dmrid	contrast	chrom	start	stop	size	type	Bd1.1_CpG	Bd21.3_CpG	Bd21_CpG	Bd30.1_CpG	Bd3.1_CpG	BdTR12c_CpG	Koz.3_CpG	Bd1.1_CHG	Bd21.3_CHG	Bd21_CHG	Bd30.1_CHG	Bd3.1_CHG	BdTR12c_CHG	Koz.3_CHG	Bd1.1_CHH	Bd21.3_CHH	Bd21_CHH	Bd30.1_CHH	Bd3.1_CHH	BdTR12c_CHH	Koz.3_CHH
CHHDMR	13	Bd1-1.CHH	Bd1	235900	236099	199	hypo	0.839506	0.786885	0.75	NA	0.0888889	0.854839	0.872727	0.0540541	0.0526316	0.26087	NA	0.0952381	0.181818	0.390625	0.0123839	0.0779221	0.346939	NA	0.162791	0.084507	0.046332
CHHDMR	20	Bd1-1.CHH	Bd1	504100	504299	199	hyper	0.782609	0.00714286	0	0	0	0	0.00729927	0.668067	0.017094	0.027027	0	0	0	0	0.214461	0.00230947	0	0	0.00531915	0.00896861	0.00719424
CHHDMR	27	Bd1-1.CHH	Bd1	578800	578999	199	hyper	0.0517241	0.0203046	0	0	0.0212766	0.0211268	0.0159236	0.0520833	0.0209424	0	0.027027	0.00793651	0.00653595	0.0138122	0.294118	0	0	0	0	0.0133333	0
CHHDMR	88	Bd1-1.CHH	Bd1	2031700	2031899	199	hypo	1	0.666667	1	1	1	0.75	0.923077	0.0277778	0	0.037037	0	0	0	0.0655738	0.02	0.055814	0.375	0.466667	0.0210526	0	0.108808
CHHDMR	110	Bd1-1.CHH	Bd1	2411700	2411899	199	hypo	1	1	1	1	0.88	0.947368	1	1	0.896552	1	1	0.974359	0.931034	0.942029	0.0447761	0.047619	0.254144	0.0790274	0.193182	0	0.041543
CHHDMR	124	Bd1-1.CHH	Bd1	2680900	2681099	199	hypo	0.52809	0.651163	0.825	NA	NA	NA	NA	0.0930233	0.484848	0.5625	NA	NA	NA	NA	0.0238095	0.131474	0.242424	NA	NA	NA	NA
CHHDMR	159	Bd1-1.CHH	Bd1	3181900	3182099	199	hypo	0	0.290323	0.382353	0.333333	0.366197	0.3125	0.296703	0.166667	0.352941	0.785714	0.6	0.692308	0.666667	0.558824	0.00847458	0.373333	0.534483	0.568182	0.576419	0.551587	0.421875
CHHDMR	176	Bd1-1.CHH	Bd1	3435500	3435699	199	hyper	0.555556	0.8	0.666667	1	1	0.956522	0.90625	0.416667	0.818182	0.666667	1	0.666667	0.741935	0.545455	0.203822	0.0681818	0	0	0.285714	0.108911	0.204724
CHHDMR	206	Bd1-1.CHH	Bd1	4161300	4161499	199	hypo	0.791667	0.714286	0.857143	1	1	0.538462	0.928571	0.25	0	0.5	1	0	0	0.5	0	0.0277778	0.526316	0.21875	0	0.0449438	0.0849057
CHHDMR	232	Bd1-1.CHH	Bd1	4539300	4539499	199	hyper	1	0.896175	1	0.909091	0.955882	0.854369	0.910377	0.5	0.486486	0.7	0.615385	0.666667	0.456522	0.47191	0.333333	0	0.0166667	0	0	0.015625	0.0059761
CHHDMR	241	Bd1-1.CHH	Bd1	4715700	4715899	199	hypo	0.938776	NA	0.936508	NA	1	0.815287	NA	0.447368	NA	0.426667	NA	0.375	0.409836	NA	0.023622	NA	0.490385	NA	0.111111	0.508443	NA
CHHDMR	243	Bd1-1.CHH	Bd1	4739100	4739299	199	hypo	0.940789	NA	0.962617	NA	NA	0.979275	NA	0.641791	NA	0.843137	NA	NA	0.685393	NA	0.0126582	NA	0.319797	NA	NA	0.0303797	NA
CHHDMR	260	Bd1-1.CHH	Bd1	4982700	4982899	199	hyper	0.0677291	0.0116618	0	0.00485437	0.0162602	0.00334448	0.00566572	0.147727	0.00806452	0.0285714	0.0925926	0.0116279	0.0217391	0.0214286	0.222222	0	0	0	0	0	0
CHHDMR	279	Bd1-1.CHH	Bd1	5302300	5302499	199	hypo	0.672414	0.722222	0.764706	0.586207	0.907407	0.84	0.8	0.264706	0.547619	0.386364	0.225806	0.486111	0.338983	0.423913	0.0369004	0.127273	0.25	0.225225	0.187215	0.182222	0.112281
CHHDMR	286	Bd1-1.CHH	Bd1	5409500	5409699	199	hypo	0.972973	0.957143	0.816667	NA	0.969231	0.98	1	0.0793651	0.0263158	0.179487	NA	0.333333	0.0204082	0	0.0222222	0.00653595	0.307692	NA	0	0.00925926	0
CHHDMR	292	Bd1-1.CHH	Bd1	5526700	5526899	199	hypo	0.90991	0.393443	0.333333	0.540984	0.655172	0.494382	0.434783	0.598684	0.364341	0.348315	0.528571	0.376923	0.421569	0.308271	0.00838574	0.348442	0.290837	0.248826	0.25	0.3	0.257979
CHHDMR	308	Bd1-1.CHH	Bd1	5756800	5756999	199	hypo	0.528302	0.76	1	0.896552	0.907692	0.925	0.875	0.0277778	0.4375	0.6	0.454545	0.923077	0.714286	0.625	0.0136986	0.05	0.340659	0.027027	0.132075	0.0609756	0.156627
CHHDMR	310	Bd1-1.CHH	Bd1	5790200	5790399	199	hypo	1	0.9	0.958333	0.965116	0.974684	0.933333	0.9625	0.928571	0.692308	0.875	0.97619	0.852941	0.923077	0.708333	0.0218978	0.201183	0.366667	0.185185	0.129921	0.0952381	0.102273
CHHDMR	315	Bd1-1.CHH	Bd1	5917100	5917299	199	hypo	0.841121	0.944444	1	0.904762	0.892045	0.891429	0.894231	0.5	0.578571	0.882353	0.5	0.564103	0.505814	0.487805	0.032	0.0174419	0.708333	0	0.0105263	0.0143541	0
CHHDMR	403	Bd1-1.CHH	Bd1	7428600	7428799	199	hypo	0.886525	0.972603	0.909091	0.868421	0.983051	0.905405	0.844828	0.514019	0.651685	0.72549	0.8	0.779661	0.769231	0.806452	0.044843	0.0940594	0.327485	0	0.185629	0.375587	0.215232
CHHDMR	406	Bd1-1.CHH	Bd1	7471000	7471199	199	hypo	0.857143	1	1	NA	1	1	1	0.846154	0.8	1	1	1	0.666667	0.333333	0.021164	0.201389	0.457746	0.181818	0.356589	0.105263	0.225806
CHHDMR	411	Bd1-1.CHH	Bd1	7561500	7561699	199	hypo	NA	0.608696	0.809524	1	0.777778	0.565217	0.722222	NA	0	0.4	0	1	0	0	0	0.10929	0.23221	0.333333	0.0842105	0.307087	0.261364
CHHDMR	460	Bd1-1.CHH	Bd1	8417400	8417599	199	hypo	0.887446	0.9125	1	0.941176	0.971429	0.948276	0.946023	0.618056	0.766667	0.758621	0.869565	0.829268	0.811475	0.811404	0.0101523	0	0.542857	0	0	0	0.201183
CHHDMR	487	Bd1-1.CHH	Bd1	8948500	8948699	199	hypo	0	0	0.928571	NA	0	0	0.939394	0.016	0.0185185	0.766667	0	0	0.142857	0.66	0.0178571	0	0.290076	0	0.0444444	0.0178571	0.0895522
CHHDMR	492	Bd1-1.CHH	Bd1	9100500	9100699	199	hypo	1	0.945274	0.938776	NA	0.986667	1	0.95	0.333333	0.608247	0.607843	NA	0.5	0.333333	0.645455	0	0.30485	0.389831	NA	0.259887	0.285714	0.299735
CHHDMR	495	Bd1-1.CHH	Bd1	9159100	9159299	199	hypo	0.0232558	0.025641	0.942029	0.5	0	0.222222	0.137931	0	0	0.413793	0	0	0	0	0	0.0111111	0.398734	0	0	0	0.00675676
CHHDMR	526	Bd1-1.CHH	Bd1	9515700	9515899	199	hyper	0.842105	NA	0.875	NA	NA	0.333333	0	0.357143	0	0.666667	NA	NA	0	0	0.283333	0	0	NA	NA	0	0
CHHDMR	531	Bd1-1.CHH	Bd1	9557600	9557799	199	hypo	NA	0.666667	0.5	NA	1	1	NA	0	0	0.125	0	0.333333	0	0	0	0.264151	0.291667	0	0.0246914	0	0
CHHDMR	550	Bd1-1.CHH	Bd1	9726000	9726199	199	hypo	1	0.857143	0.826087	NA	1	1	1	0.555556	0.625	0.928571	0.363636	1	0.769231	0.714286	0	0.254808	0.365979	0.1875	0.276596	0.123077	0.0267857
CHHDMR	555	Bd1-1.CHH	Bd1	9750300	9750499	199	hypo	0	0.743191	0.944444	0	0	0	0	0.0188679	0.32766	0.564516	0.037037	0	0.00917431	0	0	0.326713	0.350972	0.0369004	0.00480769	0.0538642	0.0114943
CHHDMR	592	Bd1-1.CHH	Bd1	10381200	10381399	199	hypo	0.942623	0.906977	1	1	0.983333	0.791667	0.956522	0.666667	0.756098	0.888889	0.666667	0.711864	0.619048	0.695652	0.0206186	0.0408163	0.444444	0	0.0396825	0.02	0.0194175
CHHDMR	604	Bd1-1.CHH	Bd1	10622600	10622799	199	hyper	0.981651	0.977642	0.992806	0.984637	0.985141	0.98977	0.986395	0.819672	0.589744	0.581818	0.708812	0.721254	0.677419	0.775	0.396396	0.0228311	0	0.025641	0.00367647	0.0122699	0.332046
CHHDMR	619	Bd1-1.CHH	Bd1	10849100	10849299	199	hypo	0.90625	1	0.925926	1	1	1	0.884615	0.585366	0.827586	0.851852	0.866667	1	0.894737	0.708333	0.0236486	0.0322581	0.505747	0.125	0.230769	0.142857	0.0176991
CHHDMR	651	Bd1-1.CHH	Bd1	11359800	11359999	199	hyper	0.984055	0.986364	0.995215	0.982587	0.997817	0.983402	0.987788	0.754875	0.81893	0.805369	0.878327	0.89726	0.873016	0.844156	0.360987	0.450106	0	0.0338983	0.0151515	0.524793	0.608889
CHHDMR	665	Bd1-1.CHH	Bd1	11588600	11588799	199	hypo	0.4	1	0.866667	1	1	0.894737	1	0.0434783	0.780488	0.772152	0.935484	0.857143	0.830065	0.801282	0.0131579	0.273026	0.365269	0.449275	0.326	0.411859	0.341829
CHHDMR	700	Bd1-1.CHH	Bd1	12126400	12126599	199	hyper	0.73913	0	0	0	0	0.0454545	0	0.268293	0.0126582	0.0144928	0	0	0.025	0.0306122	0.25	0.0189873	0	0	0.0115607	0.147059	0
CHHDMR	704	Bd1-1.CHH	Bd1	12208600	12208799	199	hypo	0.966667	0.923077	0.857143	NA	1	1	0.962963	1	NA	NA	NA	NA	NA	NA	0.00318471	0.169643	0.313253	NA	0.208333	0.152672	0.0904523
CHHDMR	727	Bd1-1.CHH	Bd1	12528000	12528199	199	hyper	0.852459	0.894737	0.945455	0.975	0.931507	0.915385	0.921162	0.414414	0.660714	0.344828	0.42	0.545455	0.623762	0.612022	0.256086	0.22875	0.013834	0.0373134	0.1	0.451987	0.327558
CHHDMR	743	Bd1-1.CHH	Bd1	12722300	12722499	199	hypo	0.971014	0.368421	0.4	0.190476	0.916667	0.346154	0.229508	0.425926	0.182432	0.153846	0.265823	0.736842	0.161765	0.191358	0.0241546	0.253676	0.353293	0.282609	0.0869565	0.266949	0.299578
CHHDMR	769	Bd1-1.CHH	Bd1	13151000	13151199	199	hypo	1	1	1	1	1	0.75	1	0.8125	0.928571	1	1	0.666667	1	0.923077	0.0165138	0.0634328	0.355769	0.0382514	0.302326	0.0833333	0.111111
CHHDMR	801	Bd1-1.CHH	Bd1	13913600	13913799	199	hypo	0.863636	1	0.926829	0.935484	1	0.941176	0.857143	0.483871	0.333333	0.722222	0.764706	0.555556	0.758242	0.648148	0.0252101	0.0909091	0.42807	0.482014	0.434783	0.550898	0.281915
CHHDMR	818	Bd1-1.CHH	Bd1	14310700	14310999	299	hypo	0.942623	0.827957	0.87931	0.78022	0.8	0.849315	0.866071	0.295775	0.357143	0.25	0.4375	0.363636	0.193548	0.441176	0.0137174	0.0313112	0.277612	0.176573	0.0643939	0.0451807	0.0208333
CHHDMR	844	Bd1-1.CHH	Bd1	14630400	14630599	199	hypo	0.111111	0.428571	0	1	1	0.6	0.615385	0	NA	NA	NA	NA	0	0	0.0277778	0.168317	0.316456	0.244898	0.747826	0.305195	0.227848
CHHDMR	849	Bd1-1.CHH	Bd1	14794100	14794299	199	hypo	0.0384615	0.563218	0.8	0.952381	0.285714	0.766667	0.6	0.0487805	0.197531	0.42	0.846154	0.0714286	0.269231	0.333333	0.0416667	0.346479	0.453488	0.712329	0.391304	0.382812	0.333333
CHHDMR	878	Bd1-1.CHH	Bd1	15463300	15463499	199	hyper	1	1	1	NA	1	0.75	0.969697	1	0.733333	0.909091	NA	1	0.6	0.78125	0.809524	0.0103627	0	NA	0	0	0.0187793
CHHDMR	958	Bd1-1.CHH	Bd1	16847200	16847399	199	hypo	0.948819	0.944099	0.96124	0.964789	0.988827	0.956522	0.963899	0.686131	0.72	0.797101	0.679245	0.813187	0.680556	0.792683	0.0309951	0.331143	0.324074	0.298319	0.333333	0.177778	0.187679
CHHDMR	989	Bd1-1.CHH	Bd1	17265100	17265299	199	hypo	1	0.947368	1	1	1	0.915094	0.989247	0.0526316	0.214286	0.857143	0.857143	0.75	0.706897	0.760563	0.0343348	0.121547	0.275641	0.272	0.184049	0.0780781	0.0980392
CHHDMR	1003	Bd1-1.CHH	Bd1	17449300	17449499	199	hypo	0.181208	0.333333	0.309091	0.111111	0.0315789	0.439394	0.380952	0.160714	0.297872	0.257143	1	0	0.375	0.392857	0.00276243	0.112299	0.228571	0.5	0	0	0.0806452
CHHDMR	1025	Bd1-1.CHH	Bd1	17853800	17854099	299	hypo	1	0.88	0.793103	0.940299	0.953125	1	0.949495	0.869048	0.818182	0.860465	0.942308	0.942857	0.798165	0.823529	0.00431034	0.174497	0.368132	0.225806	0.4	0.268852	0.135849
CHHDMR	1027	Bd1-1.CHH	Bd1	17889100	17889299	199	hypo	0.857143	0.891892	1	0.8	0.909091	0.846154	0.859649	0.647059	0.466667	0.909091	0.557692	0.5625	0.466667	0.642857	0.0393996	0.134615	0.241379	0.342007	0.0943396	0.251101	0.295732
CHHDMR	1037	Bd1-1.CHH	Bd1	18222500	18222699	199	hypo	0.9375	0.733333	0.806452	1	0.933333	0.806452	0.76	0.625	0.746269	0.695652	1	0.909091	0.730769	0.823529	0.0111111	0.197802	0.370787	0.149068	0.340206	0.224719	0.267677
CHHDMR	1068	Bd1-1.CHH	Bd1	18917300	18917499	199	hypo	0.958333	0.981366	0.928571	0.972973	1	0.965517	0.973451	0.846847	0.948454	0.957447	0.98	1	0.945652	0.955128	0.0167832	0.167089	0.233696	0.149502	0.216867	0.0883882	0.0706967
CHHDMR	1086	Bd1-1.CHH	Bd1	19192800	19192999	199	hypo	0.76	0.423913	0.681159	1	0.807692	0.95	0.570093	0.527778	0.280488	0.45	0.466667	0.483871	0.708333	0.425743	0.00840336	0.22541	0.217647	0.0425532	0	0	0.0902256
CHHDMR	1121	Bd1-1.CHH	Bd1	19749800	19749999	199	hyper	0.95	0.00813008	0	0	0	0.00934579	0.0277778	0.770492	0.0140845	0	0.0526316	0.0185185	0.03125	0.0263158	0.457413	0.00543478	0	0.0384615	0.021978	0.00478469	0.0679612
CHHDMR	1122	Bd1-1.CHH	Bd1	19753200	19753399	199	hypo	0.0052356	0.00869565	0.71875	0.76087	0.682927	0.0405405	0.25	0.0150376	0	0.357143	0.425	0.219178	0	0.0588235	0	0.00546448	0.293478	0.176471	0.266304	0	0.0280899
CHHDMR	1144	Bd1-1.CHH	Bd1	20084800	20085099	299	hypo	0.892857	0.966732	0.981132	0.988024	0.969499	0.971386	0.968696	0.421053	0.672131	0.87234	0.77027	0.787234	0.768212	0.744361	0.016129	0.178957	0.422951	0.210027	0.346304	0.275235	0.249129
CHHDMR	1187	Bd1-1.CHH	Bd1	20732400	20732599	199	hypo	0.333333	NA	NA	NA	NA	NA	NA	0	NA	NA	NA	NA	NA	NA	0.0142857	0.210758	0.252555	0.308424	0.323883	0.35741	0.195628
CHHDMR	1190	Bd1-1.CHH	Bd1	20744600	20744799	199	hypo	0.666667	1	1	NA	1	1	1	0.435897	0.55814	0.8	0.2	0.818182	0.766667	0.714286	0.0326797	0.0576923	0.24359	0.0285714	0.030303	0.0429185	0.01
CHHDMR	1215	Bd1-1.CHH	Bd1	21074300	21074499	199	hypo	0.6	0.9	0.954545	NA	0.978022	0.884013	0.922261	0.4	0.507246	0.467742	NA	0.571429	0.506944	0.592308	0	0.386282	0.3875	NA	0.492537	0.464066	0.463983
CHHDMR	1217	Bd1-1.CHH	Bd1	21096500	21096699	199	hypo	0.018018	0.0379747	0.492754	0	0.347222	0.231405	0.427136	0.00952381	0.0394737	0.397351	0	0.230769	0.25	0.4	0.00355872	0.0108108	0.543689	0	0.360544	0.469314	0.387037
CHHDMR	1220	Bd1-1.CHH	Bd1	21161200	21161399	199	hypo	1	0.416667	0.833333	NA	1	1	0.944444	0.533333	0.45	0.8	NA	0.75	0.615385	0.827586	0	0.0746269	0.571429	NA	0	0.108696	0.271186
CHHDMR	1224	Bd1-1.CHH	Bd1	21258600	21258799	199	hypo	0.935743	0.84	0.897059	0.934426	1	0.971154	0.854545	0.75969	0.694737	0.621951	0.704918	0.84	0.818182	0.724138	0.0149051	0.202361	0.410194	0.243056	0.25	0.394265	0.368293
CHHDMR	1246	Bd1-1.CHH	Bd1	21520000	21520199	199	hyper	0.942308	0.983333	1	1	0.951613	0.984848	0.940594	0.727273	0.634146	0.761905	0.657534	0.730769	0.68	0.701031	0.288462	0.00719424	0	0.00465116	0.0469799	0.016129	0.00623053
CHHDMR	1262	Bd1-1.CHH	Bd1	21898100	21898399	299	hypo	1	0.461538	1	0.916667	0.6875	0.375	0.5	0.444444	0.0714286	0.5	0.818182	0.25	0	0.25	0	0.172662	0.617021	0.553846	0.319149	0.272727	0.220588
CHHDMR	1269	Bd1-1.CHH	Bd1	22091900	22092099	199	hypo	0.928571	0.958333	1	1	1	0.958333	0.933333	0.921569	0.883721	0.8	0.944444	0.907407	0.891304	0.964912	0.0208333	0.0658683	0.25974	0.0754717	0.215385	0.104	0.173077
CHHDMR	1275	Bd1-1.CHH	Bd1	22249200	22249399	199	hyper	0.953846	0.981073	0.995074	0.989627	0.981859	0.985656	0.0375	0.936782	0.737052	0.840426	0.79257	0.746356	0.874016	0.00746269	0.353448	0.0145349	0.00420168	0.00970874	0.0141844	0.0447427	0.0147783
CHHDMR	1280	Bd1-1.CHH	Bd1	22336700	22336899	199	hypo	0.890411	1	0.962963	0.793103	0.75	0.846154	1	0.375	0.666667	0.625	0.615385	0.75	0.833333	0.666667	0	0	0.293651	0.119565	0	0.268293	0.0288462
CHHDMR	1297	Bd1-1.CHH	Bd1	22551000	22551199	199	hyper	0.949275	0.96	1	0.911111	0.978571	0.973214	0.958159	0.411111	0.659794	0.769231	0.7	0.465347	0.475	0.469136	0.312236	0	0	0	0	0.00361011	0.00273973
CHHDMR	1321	Bd1-1.CHH	Bd1	22923500	22923699	199	hypo	0.879518	0.412698	0.803922	0.4	0.648936	0.42029	0.343434	0.166667	0.273224	0.352941	0.386555	0.257353	0.42963	0.158228	0.0149701	0.152062	0.524664	0.20362	0.120623	0.270073	0.131498
CHHDMR	1351	Bd1-1.CHH	Bd1	23343200	23343399	199	hypo	0.8	0.0519481	0.192308	0.277778	0.4	0.0833333	0.0588235	0.7	0.0776699	0.147059	0.28	0.125	0.148148	0.0752688	0.0298507	0.271293	0.364341	0.503876	0.295775	0.215827	0.212291
CHHDMR	1361	Bd1-1.CHH	Bd1	23532000	23532199	199	hypo	0.916667	1	0.75	1	1	1	0.870968	0.766667	0.875	0.833333	0.333333	1	0.888889	0.761905	0.0304054	0.0119048	0.363636	0.12	0.025	0.0483871	0.0555556
CHHDMR	1369	Bd1-1.CHH	Bd1	23612000	23612199	199	hyper	1	1	1	0.882353	1	1	0.966667	0.142857	0.333333	0.5	0.25	0.2	0.333333	0.285714	0.246154	0	0	0.0714286	0.05	0.016129	0.0533333
CHHDMR	1375	Bd1-1.CHH	Bd1	23696200	23696399	199	hypo	0	0.15	0.533865	0.418719	0.348889	0.326761	0.468889	0.038961	0.0196078	0.241888	0.195402	0.20347	0.152632	0.25889	0.0184049	0.0377358	0.257426	0.180328	0.21791	0.138083	0.211654
CHHDMR	1384	Bd1-1.CHH	Bd1	23946300	23946499	199	hypo	1	0.9	1	0.909091	0.952381	1	1	0.777778	0.285714	0.814815	0.933333	0.8	1	0.75	0.0424929	0.176471	0.312217	0.390071	0.242678	0.210084	0.126582
CHHDMR	1411	Bd1-1.CHH	Bd1	24299700	24299899	199	hypo	0.222222	0.777778	0.285714	NA	1	0	0.444444	0	1	1	NA	0	NA	0	0	0.309859	0.297872	0.857143	0.132075	0	0.225
CHHDMR	1436	Bd1-1.CHH	Bd1	24627200	24627399	199	hypo	0.636364	0.904762	0.785714	0.5	0.913978	1	NA	0.444444	0.88	0.833333	1	0.855769	NA	NA	0	0.444444	0.390476	0	0.636771	0	NA
CHHDMR	1501	Bd1-1.CHH	Bd1	25754000	25754199	199	hypo	0.94	0.896552	0.916667	1	1	1	0.931034	0.8	0.4	0.3	NA	0.5	0.111111	0.5	0.0384615	0.233333	0.280702	0.133333	0.0877193	0.0810811	0.278351
CHHDMR	1506	Bd1-1.CHH	Bd1	25819700	25819899	199	hypo	0.828571	0.775	0.84375	0.943396	0.675	0.975	0.763359	0.5	0.5	0.2	NA	0	0.5	0	0.019802	0.512821	0.588235	0.691176	0.530303	0.355932	0.395349
CHHDMR	1509	Bd1-1.CHH	Bd1	25841200	25841399	199	hypo	0.928571	1	0.75	1	NA	1	1	0.854167	0.888889	0.875	1	1	0.904762	0.862069	0.0329218	0.0813397	0.2	0.037037	0.157895	0.0206186	0.0308989
CHHDMR	1518	Bd1-1.CHH	Bd1	26065200	26065399	199	hypo	0.9	0.984772	0.985507	0.977444	0.973684	0.968	0.987234	0.333333	0.625571	0.658537	0.79798	0.844898	0.753165	0.755474	0.0188679	0.0125523	0.327586	0.235294	0.0118343	0.369231	0.0283019
CHHDMR	1554	Bd1-1.CHH	Bd1	26870300	26870499	199	hyper	0.993464	0.968974	0.985915	0.981279	0.960938	0.965909	0.978328	0.689655	0.619048	0.37037	0.855263	0.614458	0.701299	0.661765	0.485437	0.0260417	0	0.0410256	0.028436	0.123711	0.0114286
CHHDMR	1579	Bd1-1.CHH	Bd1	27349000	27349199	199	hypo	0.966667	0.7	0.857143	1	0.666667	0.772727	0.833333	0.753623	0.157895	0.5625	0.461538	0.321429	0.25	0.351351	0.022082	0.109589	0.258278	0.0444444	0.116162	0.326241	0.0331492
CHHDMR	1580	Bd1-1.CHH	Bd1	27361800	27362099	299	hypo	0.5625	1	0.913043	0.964912	1	0.931034	0.921875	0.4	0.810811	0.645161	0.6875	0.813559	0.666667	0.65	0	0.138801	0.25	0.221429	0.243767	0.0880503	0.108187
CHHDMR	1597	Bd1-1.CHH	Bd1	27566800	27566999	199	hypo	0.923077	0.921687	0.967742	0.919355	0.933555	0.97093	0.963351	0.810811	0.5	0.607143	0.383838	0.53125	0.625	0.643617	0.0136986	0.215352	0.421569	0.389163	0.292913	0.345733	0.283972
CHHDMR	1608	Bd1-1.CHH	Bd1	27812700	27812899	199	hypo	0	0.153153	0.09375	0.272727	0.0980392	0.162162	0.111111	0	0.16	0.0857143	0.222222	0.264706	0.272727	0.157895	0.00813008	0.466535	0.580275	0.667954	0.647826	0.460317	0.494444
CHHDMR	1612	Bd1-1.CHH	Bd1	27872400	27872599	199	hypo	0.625	1	0.909091	0.666667	NA	0.8	0.2	0.0638298	0.6	0.814815	0.735294	0.871795	0.544118	0.733333	0.00917431	0.104167	0.398058	0.277778	0.268657	0.146667	0.127451
CHHDMR	1614	Bd1-1.CHH	Bd1	27907600	27907799	199	hyper	0.903509	0.947712	0.986425	0.981481	0.968825	0.978852	0.980488	0.513514	0.533333	0.655367	0.630508	0.64557	0.455224	0.655488	0.449339	0.144876	0.025788	0.0114155	0.0608696	0.14425	0.356244
CHHDMR	1620	Bd1-1.CHH	Bd1	27989800	27989999	199	hypo	1	0.967391	1	1	0.983871	0.965517	0.947917	0.895833	0.797037	0.856115	0.860158	0.883803	0.832707	0.792899	0.00546448	0.0715706	0.22549	0.0586319	0.0947776	0.130221	0.149675
CHHDMR	1650	Bd1-1.CHH	Bd1	28324600	28324799	199	hypo	0.846154	0.916667	0.933333	0.555556	1	1	0.757576	0.9	0.358974	0.806452	0.714286	0.810811	0.521739	0.512821	0.0234375	0.102941	0.251748	0.147541	0.204082	0.1	0.0769231
CHHDMR	1682	Bd1-1.CHH	Bd1	28966900	28967099	199	hypo	0.948031	0.974948	0.671958	0.677524	0.955137	0.652074	0.141573	0.507895	0.477612	0.358025	0.472727	0.415816	0.520408	0.0829876	0.0260173	0.0334572	0.257019	0.452188	0.0290179	0.311981	0.0871795
CHHDMR	1736	Bd1-1.CHH	Bd1	30078200	30078399	199	hypo	0.961749	0.975124	0.968847	0.98153	0.963478	0.982609	0.972125	0.246305	0.802198	0.932854	0.917012	0.681458	0.751351	0.87426	0.00241546	0.462451	0.717833	0.01417	0.550926	0.126087	0.288998
CHHDMR	1737	Bd1-1.CHH	Bd1	30106600	30106799	199	hypo	NA	NA	NA	NA	NA	NA	NA	0.25	1	1	NA	0.8	1	0.5	0.0305344	0.136364	0.391304	NA	0.457627	0.2	0
CHHDMR	1744	Bd1-1.CHH	Bd1	30196700	30196899	199	hypo	0.896552	0.892857	1	NA	1	1	1	0.529412	0.876923	0.809524	NA	0.846154	NA	NA	0.0218978	0.00440529	0.227848	NA	0.025	0	0
CHHDMR	1750	Bd1-1.CHH	Bd1	30306500	30306699	199	hypo	0	0	0.647059	NA	0	0	0.142857	0.0416667	0	0.0555556	NA	0.5	0	0.0909091	0	0	0.229167	NA	0	0.06	0.0425532
CHHDMR	1759	Bd1-1.CHH	Bd1	30472800	30472999	199	hypo	0.769231	1	0.909091	0.833333	1	0.925926	0.923077	0.9375	0.615385	0.75	0.7	0.375	0.428571	0.561404	0.0121212	0.0273973	0.457627	0.169811	0.282051	0.132597	0.150877
CHHDMR	1807	Bd1-1.CHH	Bd1	31498500	31498799	299	hypo	0.664234	0.728814	0.736842	0.896552	0.78022	0.886905	0.8159	0.181319	0.340164	0.410714	0.392857	0.409449	0.515385	0.430657	0.0296053	0.190265	0.284264	0.236842	0.247475	0.169811	0.12782
CHHDMR	1829	Bd1-1.CHH	Bd1	31880900	31881099	199	hypo	0	0	0.384615	NA	NA	NA	0.117647	0	0	0.133333	NA	NA	NA	0	0.00662252	0.0326087	0.318966	NA	0.0625	NA	0.258621
CHHDMR	1872	Bd1-1.CHH	Bd1	32600300	32600499	199	hypo	0.983923	0.98325	0.980892	0.8	0.987382	0.987076	0.64	0.615385	0.818713	0.931034	0.815789	0.950617	0.822086	0.954545	0.0204082	0.0168539	0.554054	0.0909091	0.0229885	0.00552486	0.263158
CHHDMR	1912	Bd1-1.CHH	Bd1	33109100	33109299	199	hypo	0.848485	0.969697	0.941176	1	0.846154	1	0.964286	0.142857	0.111111	0.25	NA	0	0	0.428571	0	0.00851064	0.409302	0.0666667	0	0.0816327	0.395122
CHHDMR	1919	Bd1-1.CHH	Bd1	33182400	33182599	199	hypo	0.815126	0.571429	0.888889	0.826087	0.954545	0.757576	0.897059	0.611111	1	0.5	1	1	0.636364	0.727273	0.0273973	0.0588235	0.264706	0	0.21875	0.0322581	0
CHHDMR	1930	Bd1-1.CHH	Bd1	33283700	33283899	199	hypo	0.961538	0.8	1	0.857143	1	0.818182	0.884615	1	1	1	0.842105	1	0.896552	0.681818	0.037931	0.0148148	0.253968	0.360153	0.0740741	0.197674	0.185915
CHHDMR	1940	Bd1-1.CHH	Bd1	33424700	33424899	199	hyper	1	1	1	1	1	1	1	0	0.888889	1	1	0.833333	0.857143	1	0.243902	0.0113636	0.0307692	0	0.056338	0	0
CHHDMR	1961	Bd1-1.CHH	Bd1	33902100	33902299	199	hypo	1	0.909091	1	NA	NA	1	0.857143	0.5	NA	0.5	NA	NA	1	1	0	0.1875	0.470588	NA	NA	0.03125	0.206897
CHHDMR	1966	Bd1-1.CHH	Bd1	33956900	33957099	199	hypo	0.821429	0.761194	0.878788	0.916667	0.8	0.875	0.666667	0.321429	0.445652	0.456522	0.857143	0.823529	0.630769	0.377358	0.0259067	0.153846	0.20765	0.097561	0.194444	0.298387	0.198758
CHHDMR	1971	Bd1-1.CHH	Bd1	34023800	34023999	199	hyper	0.936709	0.0125786	0	0	0	0.0189873	0.986111	0.747899	0.00411523	0.0147059	0	0.0246914	0.00409836	0.829137	0.283668	0	0	0	0	0.00740741	0.268657
CHHDMR	1976	Bd1-1.CHH	Bd1	34113100	34113299	199	hypo	NA	NA	NA	NA	NA	NA	NA	1	0.764706	1	1	1	0.961538	1	0.011976	0.154867	0.234234	0.309524	0.222222	0.227119	0.296296
CHHDMR	2008	Bd1-1.CHH	Bd1	34753100	34753299	199	hypo	0.959459	0.988166	0.980583	1	0.979167	0.967742	0.969466	0.479592	0.711111	0.876712	0.894737	0.913043	0.783784	0.642202	0.00632911	0.0322581	0.266667	0	0	0.0647059	0.0049505
CHHDMR	2042	Bd1-1.CHH	Bd1	35282300	35282499	199	hypo	0.953488	0.966102	0.986667	0.888889	0.963768	0.945813	0.967742	0.8125	0.72973	0.833333	0.416667	0.672414	0.773333	0.79661	0.0120482	0.224359	0.225564	0.00869565	0.0663265	0.184783	0.0888469
CHHDMR	2065	Bd1-1.CHH	Bd1	35919000	35919399	399	hypo	0.432432	0.305882	0.418605	0.263158	0.511628	0.323529	0.19469	0.166667	0.403226	0.342857	0.185185	0.327273	0.277778	0.202381	0.0171233	0.304802	0.405751	0.395954	0.26087	0.313924	0.26873
CHHDMR	2109	Bd1-1.CHH	Bd1	36952300	36952499	199	hyper	0.904762	0.956522	0.983516	0.947619	0.964539	0.983373	0.973684	0.8125	0.666667	0.672131	0.789474	0.675	0.656	0.77037	0.442308	0.0497925	0.00645161	0	0.0206186	0.0346154	0.0740741
CHHDMR	2163	Bd1-1.CHH	Bd1	37923000	37923199	199	hyper	0.35	0.489362	0.6	0.6	0.52	0.166667	0.368421	0.277778	0.0625	0.142857	0.142857	0.0740741	0.0465116	0.132075	0.35443	0.00621118	0	0	0.0229885	0.078125	0.0143885
CHHDMR	2174	Bd1-1.CHH	Bd1	38031200	38031499	299	hypo	0.923077	0.888	0.979592	1	0.963636	0.963504	0.938967	0.194444	0.315789	0.307692	0.769231	0.416667	0.392857	0.321839	0.0131234	0.0450704	0.367876	0.134328	0.0331754	0.221172	0.206009
CHHDMR	2203	Bd1-1.CHH	Bd1	38530000	38530199	199	hyper	1	0.961538	1	0.991597	0.947368	0.966667	0.946903	0.5	0.753333	0.675676	0.632479	0.704819	0.702247	0.7375	0.285714	0.0165631	0	0.0293333	0.00295858	0.00856164	0.0116959
CHHDMR	2237	Bd1-1.CHH	Bd1	39494300	39494499	199	hyper	0.982759	0.935673	0.994382	0.966667	0.988235	0.996124	0.982955	0.80814	0.68	0.706422	0.636364	0.919753	0.933333	0.813853	0.262009	0.0869565	0.0119048	0	0.10084	0.0191083	0.0203046
CHHDMR	2241	Bd1-1.CHH	Bd1	39552500	39552699	199	hypo	0.638655	0.709402	0.617021	1	0.6	0.53125	0.584071	0.126582	0.293103	0.461538	0.666667	0	0.261905	0.106061	0.0162602	0.262548	0.233766	0.652174	0.148148	0.231884	0.169903
CHHDMR	2260	Bd1-1.CHH	Bd1	39837000	39837199	199	hypo	0.866667	1	1	1	0.931034	0.8	0.869565	0.407407	0	0.75	NA	0.95	0.75	0.7	0.0168067	0.166667	0.294118	0.647059	0.0909091	0.504505	0.238579
CHHDMR	2274	Bd1-1.CHH	Bd1	40123300	40123499	199	hypo	0.964286	0.949153	0.846154	NA	0.956522	1	0.909091	0.865979	0.722222	0.83871	NA	0.724138	0.706897	0.782609	0.0087146	0	0.478632	NA	0.0129032	0.0206897	0.286667
CHHDMR	2286	Bd1-1.CHH	Bd1	40280000	40280199	199	hypo	0.987578	0.9375	0.987421	0.78022	0.70339	0.786517	0.952381	0.56338	0.243243	0.6	0.505263	0.445455	0.491228	0.508039	0.0206379	0.109589	0.282378	0.217647	0.224044	0.209524	0.192875
CHHDMR	2287	Bd1-1.CHH	Bd1	40280900	40281099	199	hypo	0.933333	0.75	1	1	NA	1	1	0.6	0.5	0.851852	1	NA	0.928571	0.627907	0.0346821	0	0.401961	0	NA	0.030303	0.22467
CHHDMR	2291	Bd1-1.CHH	Bd1	40357100	40357299	199	hypo	0.944882	0.927419	0.953846	0.976744	0.938776	0.961538	0.910714	0	0	0	0	0	0.333333	0.333333	0.00675676	0.0848214	0.222222	0.107843	0.0539773	0.191257	0.145833
CHHDMR	2297	Bd1-1.CHH	Bd1	40480000	40480199	199	hypo	0	1	1	0.818182	0	0.939394	0.96875	0	0.842105	0.896	0.875	0	0.798995	0.891626	0	0.256705	0.295165	0.271084	0	0.293185	0.313253
CHHDMR	2325	Bd1-1.CHH	Bd1	40762900	40763099	199	hypo	0.782609	0.97093	0.988235	0.887931	0.833333	0.952	0.985507	0.380952	0.519481	0.735294	0.282609	0.383838	0.507692	0.648649	0.0142857	0.0572519	0.211864	0	0.0446735	0.0674157	0.103093
CHHDMR	2344	Bd1-1.CHH	Bd1	41068700	41068899	199	hypo	0.959184	0.978365	0.972376	0.986957	0.895397	0.973262	0.982796	0.575758	0.785388	0.859649	0.876543	0.854545	0.873737	0.88	0	0.184325	0.267409	0.133333	0.260745	0.52457	0.569398
CHHDMR	2347	Bd1-1.CHH	Bd1	41143700	41143899	199	hyper	0.933333	1	0.866667	0.928571	0.881356	1	1	0.718615	0.873294	0.884793	0.175758	0.813586	0.864971	0.918089	0.387435	0.0246305	0.0348259	0.0409836	0.033195	0.0683507	0.196078
CHHDMR	2351	Bd1-1.CHH	Bd1	41160200	41160399	199	hypo	0.882353	0.75	0.909091	0.75	0.809524	0.6875	0.837838	0.625	0.3	0.75	0	0.428571	0.25	0.333333	0.0136986	0.316832	0.221154	0.142857	0.449612	0.189542	0.125541
CHHDMR	2352	Bd1-1.CHH	Bd1	41165200	41165399	199	hypo	0.988372	0.934426	1	1	0.90566	1	0.967213	0.843137	0.862069	0.882353	1	0.952381	0.795918	0.954545	0.0320513	0.0791139	0.312977	0.121951	0.104348	0.129412	0.0152672
CHHDMR	2393	Bd1-1.CHH	Bd1	41813400	41813599	199	hypo	0.984375	0.957447	0.947368	1	0.942857	0.941176	1	0.812121	0.875862	0.962264	0.981132	0.894737	0.877698	0.864198	0.0183486	0.23341	0.5	0.186207	0.26087	0.274143	0.167347
CHHDMR	2465	Bd1-1.CHH	Bd1	43030900	43031099	199	hypo	0.816456	0.863636	0.612903	0.981818	0.920792	0.768293	0.48	0.355263	0.40625	0.365385	0.277778	0.290323	0.351064	0.335878	0.043299	0.205729	0.277311	0.26	0.201878	0.366733	0.176378
CHHDMR	2472	Bd1-1.CHH	Bd1	43169100	43169299	199	hypo	1	0.938865	0.969697	0.930233	0.961538	0.977401	0.944134	0.666667	0.88	0.75	0.6	0.857143	0.731707	0.6	0	0.162712	0.226337	0.185676	0.108647	0.250564	0.0816733
CHHDMR	2529	Bd1-1.CHH	Bd1	44101700	44101899	199	hypo	0.972222	0.411765	1	1	0.571429	0.722222	0.95	0	0	0	NA	0.166667	0.027027	0	0.0126582	0.0289855	0.272727	0.0625	0	0.0275229	0.038835
CHHDMR	2564	Bd1-1.CHH	Bd1	44896700	44896899	199	hyper	0.940299	1	0.972222	1	0.5	1	0.928571	0.683333	0.705882	0.813953	0	0.571429	0.2	0.6	0.36	0.331034	0.0115607	NA	0	0.0714286	0
CHHDMR	2583	Bd1-1.CHH	Bd1	45232400	45232599	199	hypo	0	0.115607	0.326531	0.238938	0.102041	0.143564	0.198068	0.015873	0.0273224	0.015873	0.0211268	0	0.0225989	0.0289017	0	0.240196	0.352201	0.212389	0.120567	0.130612	0.2
CHHDMR	2593	Bd1-1.CHH	Bd1	45341400	45341599	199	hypo	0.022508	0.976519	0.987578	0.895197	0.862222	0.980349	0.878788	0.0220588	0.530973	0.548611	0.331897	0.1	0.296137	0.134021	0.00662252	0.00852273	0.415301	0.0225564	0.00724638	0.113772	0
CHHDMR	2599	Bd1-1.CHH	Bd1	45430100	45430399	299	hypo	0.651163	0.740741	0.865385	0.8	1	0.782609	0.930233	0.1	0.272727	0.5	0	0.6	0.444444	0.409091	0.0165289	0.103004	0.289474	0.114754	0.160714	0.328829	0.172619
CHHDMR	2654	Bd1-1.CHH	Bd1	46025300	46025499	199	hypo	0.857143	0.945946	1	0.944444	0.95122	0.805556	0.859649	0.425532	0.435484	0.580645	0.387097	0.534483	0.507937	0.530612	0.0141509	0.139785	0.32	0.14433	0.0970149	0.122066	0.188356
CHHDMR	2693	Bd1-1.CHH	Bd1	46799500	46799899	399	hypo	0.924528	0.867188	0.977273	1	0.890909	0.84375	0.913386	0.259259	0.662162	0.6	NA	0.69697	0.5	0.607595	0.021097	0.335948	0.34186	0	0.285714	0.261364	0.289926
CHHDMR	2695	Bd1-1.CHH	Bd1	46808100	46808299	199	hypo	0.96875	1	0.125	1	0.545455	1	1	0.857143	0.266667	0.5	1	0.3	0.75	0.545455	0.00681818	0	0.360656	0.155556	0.133333	0	0.00438596
CHHDMR	2697	Bd1-1.CHH	Bd1	46831900	46832099	199	hypo	0.976852	0.930168	0.956044	0.9	0.990148	0.866856	0.979675	0.872146	0.848148	0.833333	0.977273	0.680412	0.73057	0.776398	0.0338645	0.257493	0.300341	0.0987654	0.115265	0.254833	0.172612
CHHDMR	2708	Bd1-1.CHH	Bd1	46885300	46885499	199	hypo	1	1	1	1	1	1	1	1	1	1	0	0.75	1	1	0.00529101	0.118421	0.265823	0.833333	0.105263	0.0363636	0.00877193
CHHDMR	2730	Bd1-1.CHH	Bd1	47267600	47267799	199	hypo	0.859649	0.929825	0.964286	0.981651	0.944882	0.976471	0.980132	0.5	0.952381	1	1	0.961538	1	0.888889	0.00460829	0.336614	0.373832	0.387342	0.348101	0.236413	0.346648
CHHDMR	2739	Bd1-1.CHH	Bd1	47342600	47342799	199	hyper	0.962963	0.981087	1	0.975155	0.89801	0.969595	0.981818	0.675676	0.564706	0.626168	0.773196	0.59127	0.534091	0.503205	0.606557	0.00251889	0.0116279	0.00699301	0.00526316	0	0.201814
CHHDMR	2740	Bd1-1.CHH	Bd1	47355800	47355999	199	hypo	0.844444	0.939759	0.980952	0.971429	0.929385	0.969512	0.956284	0.5	0.463087	0.526316	0.533333	0.53125	0.517857	0.458015	0.0357143	0.136778	0.25	0.109589	0.143182	0.116981	0.0620438
CHHDMR	2741	Bd1-1.CHH	Bd1	47384600	47384799	199	hyper	0.888889	0.153846	0	0	0.857143	1	0	0.5	0	0.0714286	0	0	0.178571	0	0.505495	0.213333	0	0	0.475	0.0151515	0.0172414
CHHDMR	2762	Bd1-1.CHH	Bd1	47721200	47721399	199	hypo	NA	NA	NA	NA	NA	NA	NA	NA	NA	NA	NA	NA	NA	NA	0.00787402	0.147996	0.303621	0.454106	0.315457	0.274194	0.317781
CHHDMR	2792	Bd1-1.CHH	Bd1	48129000	48129199	199	hypo	0.969697	0.866667	0.978723	0.947368	0.944444	0.861111	0.886364	0.634146	0.709677	0.5	1	1	0.714286	0.697674	0.0337838	0.197339	0.341615	0.294737	0.0677083	0.149466	0.254509
CHHDMR	2795	Bd1-1.CHH	Bd1	48173900	48174099	199	hyper	0.833333	0.921233	1	0.937799	0.945687	0.954545	0.938776	0.923077	0.726776	0.666667	0.705263	0.685714	0.634146	0.700599	0.42623	0.0321429	0.0185185	0.0458716	0.0340136	0.0395257	0.155131
CHHDMR	2809	Bd1-1.CHH	Bd1	48427700	48427899	199	hypo	0.47619	0	0.916667	NA	NA	NA	0	0.225806	0	0.166667	0	0	0	0	0.0392749	0.04	0.230159	0	0	0	0
CHHDMR	2816	Bd1-1.CHH	Bd1	48566400	48566599	199	hypo	0.75	0	1	0.666667	1	1	1	NA	NA	NA	1	NA	NA	NA	0	0.0108696	0.267857	0.209302	0.22	0.5	0.161765
CHHDMR	2832	Bd1-1.CHH	Bd1	48823600	48823799	199	hypo	1	0.945946	0.818182	1	1	0.963636	1	0.882353	0.909091	1	1	1	0.857143	0.833333	0.020979	0.008	0.341463	0	0.196078	0.0196078	0
CHHDMR	2843	Bd1-1.CHH	Bd1	49151800	49151999	199	hypo	0.846154	0.761062	0.996795	0.6	0.639175	0.972313	0.973126	0.5625	0.875	0.62201	0.636364	0.846154	0.702811	0.708408	0	0.0294118	0.414676	0	0	0.143293	0.178451
CHHDMR	2862	Bd1-1.CHH	Bd1	49400500	49400699	199	hypo	0.163934	0.928571	0.967742	1	0.607143	0.857143	0.27907	0	0	0.930435	0	0.0454545	0	0.015625	0	0.0147059	0.342365	0	0.0116959	0	0.00371747
CHHDMR	2938	Bd1-1.CHH	Bd1	50825800	50825999	199	hypo	0.923077	1	1	0.333333	1	0.916667	0.916667	0.613636	0.7	0.909091	1	0.833333	0.875	0.75	0.0410959	0.183007	0.277108	0.0952381	0	0.225	0.201613
CHHDMR	2975	Bd1-1.CHH	Bd1	51362900	51363099	199	hyper	0.859155	0.952475	0.97037	0.656716	0.959055	0.928783	0.952055	0.833333	0.580189	0.807018	0	0.697368	0.529851	0.551402	0.208333	0.0316594	0.0107143	0.100719	0.0470046	0.0134003	0.0334686
CHHDMR	2983	Bd1-1.CHH	Bd1	51475200	51475399	199	hypo	0.5	0.741573	0.875	1	0.650943	0.578947	0.75641	0.142857	0	0	1	0	0.08	0.0909091	0	0.428969	0.518919	0	0.389744	0.429032	0.420398
CHHDMR	2984	Bd1-1.CHH	Bd1	51488700	51488899	199	hypo	1	0.285714	0.5	1	0.75	0.928571	1	0	0	0.2	0	0	0	0	0.00917431	0.029703	0.471429	0.0666667	0.230769	0.494253	0.192308
CHHDMR	2993	Bd1-1.CHH	Bd1	51606500	51606699	199	hypo	0.938776	0.0186916	0.233333	0.974684	0.128205	0.097561	0.958491	0.773006	0.219512	0.490196	0.881988	0.213115	0.347826	0.742063	0.0191083	0.230986	0.470803	0.0421053	0.187291	0.419355	0.0192719
CHHDMR	2997	Bd1-1.CHH	Bd1	51627300	51627599	299	hypo	0.963964	0.924528	0.985507	1	0.98	0.975904	0.984375	0	0.241379	0.333333	0.666667	0.25	0.3125	0.45	0.0214425	0.10375	0.300578	0.109914	0.0930736	0.150221	0.123775
CHHDMR	2998	Bd1-1.CHH	Bd1	51643600	51643799	199	hypo	1	0.980226	0.959016	0.962025	0.986486	0.977011	0.975	0.666667	0.497959	0.73913	0.7375	0.720721	0.5	0.57672	0	0.183007	0.435714	0.03125	0.040404	0	0.0234375
CHHDMR	3029	Bd1-1.CHH	Bd1	52087100	52087299	199	hypo	0.968504	0.978417	1	0.75	1	1	0.893617	0.709898	0.846608	0.973684	0.8	0.895522	0.868613	0.841121	0.0249042	0.00815661	0.238095	0	0	0.0805785	0.0480349
CHHDMR	3042	Bd1-1.CHH	Bd1	52244100	52244299	199	hypo	0.85274	0.929293	0.983784	0.96603	0.954	0.980435	0.966206	0.232877	0.421569	0.428571	0.408602	0.2	0.155844	0.222222	0.0438247	0.326781	0.350195	0.0147783	0.0315315	0.0459519	0.114398
CHHDMR	3051	Bd1-1.CHH	Bd1	52363700	52363899	199	hypo	1	NA	0.875	NA	0	0	0	0.118421	0.214286	0.5	0	0.391304	0.245283	0.285714	0.0300429	0.0192308	0.468085	NA	0.0833333	0.122222	0.115385
CHHDMR	3076	Bd1-1.CHH	Bd1	52837800	52838099	299	hypo	0.925	0.991453	0.976744	0.980952	0.955056	1	1	0.85	0.769231	0.851852	0.823529	0.947368	0.831683	0.803922	0.0325048	0.060423	0.253456	0.0368421	0.0662651	0.037294	0.0583409
CHHDMR	3079	Bd1-1.CHH	Bd1	52872900	52873099	199	hypo	1	0.9375	0.928571	1	0.954545	0.963636	0.852941	0.625	0.6	0.823529	NA	0.965517	0.672727	0.708333	0.00890208	0.092	0.223776	0.666667	0.16	0.223404	0.0982906
CHHDMR	3105	Bd1-1.CHH	Bd1	53347100	53347299	199	hypo	0.231884	0.166667	0.785714	0.727273	0.513514	0.3	0.388889	0.0485437	0.108696	0.0454545	0.25	0.222222	0.0606061	0.106061	0.0314685	0.076087	0.264151	0.147059	0.188172	0.0420168	0.22439
CHHDMR	3108	Bd1-1.CHH	Bd1	53388400	53388599	199	hypo	NA	NA	NA	NA	NA	NA	NA	NA	NA	NA	NA	NA	NA	NA	0.031746	0.332317	0.550459	0.512635	0.509317	0.464368	0.440806
CHHDMR	3116	Bd1-1.CHH	Bd1	53524500	53524699	199	hypo	0.166667	0	0.629808	0	0.53202	0	0	0.0454545	0	0.3375	0	0.193878	0	0	0	0.0526316	0.413355	0	0.398907	0	0
CHHDMR	3121	Bd1-1.CHH	Bd1	53681500	53681699	199	hyper	0.95671	0.888235	0.990196	0.992308	0.926254	0.964706	0.983146	0.35	0.74026	0.322581	0.85	0.759615	0.495798	0.694215	0.284768	0.00438596	0	0.012945	0.00823045	0.00241546	0.0214797
CHHDMR	3133	Bd1-1.CHH	Bd1	53987400	53987799	399	hypo	0.924242	0.805195	0.769231	0.939394	1	0.969231	0.858757	0.311111	0.615385	0.727273	0.5	1	0.463415	0.516667	0.00507614	0.176334	0.29078	0.290698	0	0.168627	0.130282
CHHDMR	3138	Bd1-1.CHH	Bd1	54031800	54031999	199	hypo	0.947368	0.962963	0.944444	0.967213	0.985075	0.923077	0.916667	0.859504	0.904762	0.840909	0.892857	0.928571	0.744186	0.797101	0.0116279	0.230248	0.359813	0.246711	0.044335	0.262357	0.218509
CHHDMR	3145	Bd1-1.CHH	Bd1	54138600	54138799	199	hypo	0.880952	0.75625	0.77551	0.803279	1	0.92	0.837989	0.485714	0.368421	0.619048	0.6	0.578947	0.516667	0.513514	0.0121951	0.0848708	0.315152	0.204082	0.0615385	0.164948	0.172285
CHHDMR	3150	Bd1-1.CHH	Bd1	54227200	54227399	199	hypo	1	0.88	1	0.984	1	1	0.842105	1	0.4	0	0.727273	0.4	NA	0.375	0	0.213592	0.460317	0.186528	0.05	0.151515	0.0784314
CHHDMR	3167	Bd1-1.CHH	Bd1	54602800	54602999	199	hyper	0.920168	0.956522	0.993671	0.831522	0.92053	0.977077	0.98574	0.875	0.661538	0.566667	0.837209	0.84375	0.77686	0.8	0.367133	0.101695	0	0.123894	0.118644	0.00793651	0.345972
CHHDMR	3187	Bd1-1.CHH	Bd1	54849700	54849899	199	hypo	0.0189873	0.237288	0.266667	0	0.0222222	0.212121	0.222222	0.00653595	0.489796	0.615385	0	0	0.4	0.44	0.00690846	0.134165	0.328542	0	0.010846	0.166667	0.113238
CHHDMR	3223	Bd1-1.CHH	Bd1	55379000	55379199	199	hypo	0.984127	0.945652	1	1	0.877551	0.863636	0.759259	0.0689655	0.435897	0.214286	0	0.214286	0.142857	0.0869565	0.0156863	0.141667	0.29717	0.248963	0.19375	0.0429448	0.15102
CHHDMR	3238	Bd1-1.CHH	Bd1	55658400	55658599	199	hypo	0.941176	0.857143	1	0.923077	1	0.904762	0.875	0.4	0	NA	NA	NA	0	0	0.01875	0.097561	0.382353	0.307692	0	0.0283019	0.210526
CHHDMR	3243	Bd1-1.CHH	Bd1	55769600	55769799	199	hyper	0.942857	0.963563	0.991561	0.93578	0.95	0.911111	0.964286	0.552795	0.510101	0.320388	0.597938	0.577778	0.758065	0.795918	0.286624	0.0198238	0.0145985	0.0208333	0.008	0.353488	0.346578
CHHDMR	3253	Bd1-1.CHH	Bd1	55942100	55942299	199	hypo	0.957082	0.755906	0.885714	0.980392	0.905738	0.80198	0.851974	0.636364	0.588028	0.740741	0.580087	0.673684	0.555882	0.532544	0.038835	0.47486	0.554348	0.0041841	0.498559	0.325459	0.255814
CHHDMR	3286	Bd1-1.CHH	Bd1	56557600	56557799	199	hypo	0.94	0.875	1	0.968912	0.982036	0.983696	0.96679	0.92	0.829268	0.891089	0.788321	0.892857	0.835294	0.877419	0	0.0136986	0.565217	0.04	0.034965	0.3861	0.698002
CHHDMR	3292	Bd1-1.CHH	Bd1	56656700	56656899	199	hypo	0.821918	0.5	0.660377	0.5	0.642857	0	0.820896	0.393939	0.25	0.575	0	0.628571	0.8	0.55	0.0268456	0.0933333	0.26257	0	0.0970149	0.0625	0.133621
CHHDMR	3328	Bd1-1.CHH	Bd1	57258800	57258999	199	hypo	NA	NA	NA	NA	NA	NA	NA	0.938776	1	0.923077	1	1	1	1	0.0391061	0.0294118	0.309392	0.00990099	0.153846	0.112745	0.0149254
CHHDMR	3330	Bd1-1.CHH	Bd1	57289800	57289999	199	hypo	0.966667	0.214789	0.384615	0.923077	0.960784	0.223881	0.977778	0.742424	0.295775	0.586207	0.6	0.8	0.485714	0.777778	0.0181818	0.185246	0.287105	0.0377358	0.0382166	0.330097	0.027451
CHHDMR	3340	Bd1-1.CHH	Bd1	57453700	57453899	199	hypo	0.983193	NA	0.952381	NA	1	1	1	0.615385	NA	0.869565	1	1	0	1	0.00934579	NA	0.329897	NA	0	0	0
CHHDMR	3364	Bd1-1.CHH	Bd1	57972700	57972899	199	hypo	0.934694	0.975186	1	0.984043	0.884354	0.935644	0.87055	0.647059	0.513699	0.666667	0.698113	0.684211	0.686567	0.689189	0.0135593	0	0.544118	0.0144928	0.016129	0.00293255	0.025641
CHHDMR	3422	Bd1-1.CHH	Bd1	59080600	59080799	199	hypo	0.962145	0.964029	0.954545	0.943503	0.910345	0.932773	0.964552	0.611111	0.578431	0.6875	0.564103	0.65	0.520833	0.671329	0	0.0896226	0.505618	0.0294118	0	0	0.275
CHHDMR	3436	Bd1-1.CHH	Bd1	59337700	59337899	199	hypo	0.037037	0.921569	0.891892	1	0.970588	0.9	0	0	0.865772	0.883117	0.694915	0.690909	0.813187	0	0.0136986	0.212371	0.270742	0.223529	0.192053	0.233333	0
CHHDMR	3439	Bd1-1.CHH	Bd1	59412900	59413099	199	hypo	0.847458	0.910891	1	1	0.885714	0.823529	0.943089	0.549296	0.863158	0.944444	0.84375	0.72973	0.671875	0.940594	0.0367647	0.129944	0.37037	0.255556	0.0724638	0.0813397	0.195122
CHHDMR	3462	Bd1-1.CHH	Bd1	59852500	59852699	199	hypo	1	0.959459	1	0.963415	0.915094	0.910448	0.947619	0.631579	0.783133	0.894737	0.794872	0.8	0.810127	0.837398	0.00816327	0.0888099	0.229773	0.235294	0.138191	0.0842105	0.117268
CHHDMR	3466	Bd1-1.CHH	Bd1	59946500	59946699	199	hypo	1	0	NA	NA	0.25	0.0666667	0.439024	0.8	0.538462	1	NA	0.666667	0.5	0.555556	0.0166113	0.178694	0.49505	1	0.0736196	0.297521	0.208955
CHHDMR	3474	Bd1-1.CHH	Bd1	60049600	60049799	199	hypo	0.94197	0.990783	0.995833	0.979522	0.988976	0.991379	0.979412	0.608333	0.821839	0.971014	0.933333	0.8875	0.895062	0.856643	0	0.151376	0.537037	0.0277778	0.0243902	0.0169492	0.564912
CHHDMR	3501	Bd1-1.CHH	Bd1	60392200	60392399	199	hypo	0.0740741	0.413793	0.333333	NA	0.333333	0.521739	0.392857	0	0.222222	0.470588	1	0.5	0.772727	0.444444	0	0.151351	0.317881	NA	0.24	0.230159	0.241758
CHHDMR	3502	Bd1-1.CHH	Bd1	60399200	60399399	199	hypo	0.833333	0.652174	0.454545	0.894737	0.966667	0.833333	1	1	0.25	0.428571	0.636364	0.567568	0.584906	0.8	0.00574713	0.110429	0.236842	0.114943	0.2125	0.105263	0.0574713
CHHDMR	3515	Bd1-1.CHH	Bd1	60647100	60647299	199	hypo	0.722222	0.818182	1	1	0.75	1	0.846154	0.785714	1	1	0.75	0.857143	1	0.916667	0.010989	0.165217	0.4	0.892857	0.125	0.264151	0.0703125
CHHDMR	3518	Bd1-1.CHH	Bd1	60673700	60673899	199	hypo	0.848837	0.636364	0.578947	0.836735	0.894737	0.766667	0	0.536842	0.469388	0.342857	0.730159	0.753846	0.634409	0.0888889	0.0145349	0.141643	0.313253	0.140684	0.19802	0.350877	0.0625
CHHDMR	3519	Bd1-1.CHH	Bd1	60674100	60674299	199	hypo	1	0.975309	1	0.965517	0.930556	1	0.989796	0.685185	0.835443	0.943662	0.898148	0.878788	0.80137	0.761111	0.0223325	0.418803	0.436472	0.373905	0.313485	0.313141	0.532246
CHHDMR	3530	Bd1-1.CHH	Bd1	60825200	60825399	199	hypo	0.636364	0.75	1	1	0.666667	1	0.75	0	0	0	0	0	0	0	0.0157895	0.103448	0.333333	0	0.153846	0.12	0.0615385
CHHDMR	3537	Bd1-1.CHH	Bd1	60873000	60873199	199	hypo	0.818182	0.925926	0.952381	1	1	0.946429	0.883117	0	0.470588	0	NA	0.363636	0.125	0.285714	0	0.242975	0.311111	0.55836	0.293006	0.361858	0.38698
CHHDMR	3556	Bd1-1.CHH	Bd1	61108700	61108899	199	hypo	0.744444	0.8125	0.95	1	0.705882	0.857143	0.823529	0	0.25	0.363636	0	0	0.133333	0.285714	0.0173913	0	0.302632	0	0.0952381	0.123457	0.160494
CHHDMR	3591	Bd1-1.CHH	Bd1	61720200	61720399	199	hypo	1	1	1	1	1	1	1	0.6	0.4	0.444444	0.25	0.666667	0.5	0.529412	0	0.120482	0.283582	0.263158	0.266667	0.555556	0.462264
CHHDMR	3601	Bd1-1.CHH	Bd1	61908800	61908999	199	hypo	0.92	0.859729	0.967742	0.944056	0.921569	0.871287	0.846473	0.559322	0.696429	0.704545	0.797297	0.776596	0.754237	0.75	0.0191571	0.252896	0.361607	0.353403	0.228963	0.332242	0.323432
CHHDMR	3651	Bd1-1.CHH	Bd1	62616000	62616199	199	hypo	1	1	0.875	1	1	NA	1	0.375	0	0.5	1	1	NA	NA	0.0187266	0.136546	0.379066	0.25	0.254902	NA	0.352941
CHHDMR	3655	Bd1-1.CHH	Bd1	62663500	62663699	199	hypo	0.862069	1	1	1	0.857143	1	0.933333	0.727273	0.5	0.538462	NA	0.4	0.875	0.56	0	0.212766	0.288136	0	0.0833333	0.107143	0.0641026
CHHDMR	3688	Bd1-1.CHH	Bd1	63140200	63140399	199	hypo	0.936508	0.92	1	NA	1	1	1	NA	NA	1	NA	NA	NA	0.333333	0.028169	0.0289855	0.251908	0.08	0.0697674	0.0880503	0.0212766
CHHDMR	3719	Bd1-1.CHH	Bd1	63448600	63448799	199	hypo	0	0.970588	0.945455	NA	1	0.813953	0.949153	0.037037	0.266667	0.411765	NA	0.619048	0.388889	0.479167	0.00206186	0.201087	0.399083	0.22619	0.34106	0.423131	0.332665
CHHDMR	3730	Bd1-1.CHH	Bd1	63647600	63647799	199	hypo	0.969231	0.0769231	0.9375	0	0.533333	0	0.78	0.2	0	0.210526	0	0	0	0.0689655	0.00666667	0	0.375	0	0	0	0.0591133
CHHDMR	3744	Bd1-1.CHH	Bd1	63833900	63834099	199	hyper	0.978723	0.975684	1	0.962441	0.991803	0.987854	0.980273	0.781955	0.833333	0.466667	0.892857	0.962963	0.796875	0.865741	0.601732	0.461003	0	0.261146	0.634146	0.456053	0.671744
CHHDMR	3755	Bd1-1.CHH	Bd1	64002100	64002299	199	hypo	0.97479	0.943089	1	1	1	0.914894	0.913043	0.962963	0.897059	0.833333	1	1	0.890909	0.920635	0.0385757	0.0528169	0.244444	0.09375	0.0471698	0.161491	0.061674
CHHDMR	3778	Bd1-1.CHH	Bd1	64359500	64359699	199	hypo	0	0.771739	0.921053	0	0.0833333	0.880435	0.0571429	0.0123457	0.633028	0.641509	0	0.0833333	0.675214	0.09375	0.0060423	0.138889	0.234375	0	0	0.245261	0.00843882
CHHDMR	3783	Bd1-1.CHH	Bd1	64437900	64438099	199	hypo	0.90625	0.566667	0.9	0.764706	0.8	0.666667	1	0.842105	0.545455	0.857143	0.857143	0.285714	0.8	1	0.0188679	0.166667	0.284091	0.432099	0.0263158	0.325203	0.440367
CHHDMR	3791	Bd1-1.CHH	Bd1	64568100	64568299	199	hypo	0.794872	0.529412	0.583333	NA	1	0.5	0.375	NA	NA	NA	NA	NA	NA	1	0.0368421	0.120172	0.46875	NA	0.133333	0.122807	0.155556
CHHDMR	3808	Bd1-1.CHH	Bd1	64824800	64824999	199	hyper	0.181818	0	0	0	0.3125	0	0.228571	0.2	0	0	0.00775194	0	0	0	0.263158	0	0.03125	0.00735294	0.015873	0	0.00571429
CHHDMR	3828	Bd1-1.CHH	Bd1	65146500	65146699	199	hypo	1	0.75	1	1	0.875	0.916667	0.916667	NA	NA	NA	NA	NA	NA	NA	0.00872093	0.254958	0.383333	0.278571	0.326241	0.348837	0.247664
CHHDMR	3830	Bd1-1.CHH	Bd1	65211800	65211999	199	hypo	0.0133333	0.05	0.911765	0.907407	NA	0	0	0.0526316	0.03125	0.54	0.939394	NA	0	0	0	0.020979	0.218085	0.412214	NA	0	0.0142857
CHHDMR	3833	Bd1-1.CHH	Bd1	65283700	65283899	199	hypo	0	0.4	0.780822	NA	0	0.777778	0	0.037037	0.568182	0.686747	NA	0	0.769231	0	0	0.376667	0.371528	0	0	0.486842	0.028169
CHHDMR	3840	Bd1-1.CHH	Bd1	65356400	65356599	199	hypo	0	0	0.285714	0	NA	0.166667	0	0.0555556	0	0	0	NA	0.0434783	0	0	0.0344828	0.272727	0	NA	0	0.121951
CHHDMR	3860	Bd1-1.CHH	Bd1	65655800	65655999	199	hypo	0.432099	0.490909	0.538462	NA	0.529412	0.40625	0.512821	0.0243902	0.115385	0	NA	0.1875	0.384615	0.107143	0.0255319	0.104651	0.37931	NA	0.189474	0.259259	0.184332
CHHDMR	3863	Bd1-1.CHH	Bd1	65704600	65704899	299	hypo	0.950355	0.974576	0.962963	0.8	1	0.985714	0.967742	0.518519	0.6	0.666667	0.666667	0.833333	0.619048	0.475	0.0195652	0.0777385	0.30137	0.0377358	0.0246914	0.09375	0.0619658
CHHDMR	3881	Bd1-1.CHH	Bd1	65959400	65959599	199	hyper	0.951389	0.973451	0.987654	0.929412	0.967684	0.965714	0.965714	0.756757	0.68652	0.909091	0.811024	0.811111	0.740099	0.778369	0.439791	0.217759	0.0181818	0.377778	0.120879	0.195833	0.271298
CHHDMR	3891	Bd1-1.CHH	Bd1	66202100	66202399	299	hypo	0.693182	0.666667	0.912281	0.92	0.894737	0.860465	0.872549	0.460317	0.333333	0.763158	0.674419	0.623762	0.4	0.486842	0.0349462	0.0290698	0.342742	0.197452	0.0282776	0.0150754	0.0714286
CHHDMR	3910	Bd1-1.CHH	Bd1	66436500	66436699	199	hypo	0.961832	0.767327	0.826087	0.870968	0.806452	0.985915	0.911392	0.622807	0.52809	0.68254	0.737705	0.482759	0.630769	0.582418	0.0262009	0.21466	0.32	0.303371	0.318841	0.376147	0.258993
CHHDMR	3921	Bd1-1.CHH	Bd1	66628200	66628399	199	hypo	0.5	0.909091	1	1	1	1	1	0.75	0.538462	1	0	1	1	1	0.0466667	0.129252	0.4	0.142857	0.2	0.175439	0.337838
CHHDMR	3925	Bd1-1.CHH	Bd1	66761800	66761999	199	hypo	1	1	0.923077	1	NA	1	1	1	NA	1	NA	NA	NA	0.5	0.0163934	0	0.622642	0.892857	NA	0.857143	0.0549451
CHHDMR	3931	Bd1-1.CHH	Bd1	66839000	66839199	199	hypo	1	0.833333	0.4	1	NA	0.863636	0.972222	0.36	0.433333	0.5	0.428571	NA	0.35	0.413793	0	0.0235294	0.571429	0.02	NA	0.0298507	0.109827
CHHDMR	3939	Bd1-1.CHH	Bd1	67049600	67049799	199	hypo	0.941176	0.836066	0.847826	1	0.928571	0.785714	0.867647	0.444444	0.423077	0.714286	0.545455	0.2	0.428571	0.514286	0.015873	0.129771	0.421488	0.136364	0.151515	0.114286	0.174863
CHHDMR	3973	Bd1-1.CHH	Bd1	67683400	67683599	199	hyper	0.841121	0.913043	0.978723	0.977679	0.987578	0.964361	0.870324	0.559322	0.658537	0.6	0.307692	0.421053	0.269231	0.652174	0.215232	0.546512	0	0.00732601	0.00574713	0.140244	0.589109
CHHDMR	3977	Bd1-1.CHH	Bd1	67710300	67710499	199	hypo	0.833333	0.916667	0.666667	0.9375	0.875	1	1	0.692308	0.735294	0.842105	0.863636	0.857143	0.923077	0.862069	0.0111111	0.101695	0.246914	0.170455	0.126506	0	0.0798319
CHHDMR	3993	Bd1-1.CHH	Bd1	67903100	67903299	199	hyper	1	0.973913	1	1	0.964912	0.881443	0.829268	0.8	0.942029	0.761905	1	0.94382	0.87931	0.870968	0.37092	0.0330761	0.00377358	0.00813008	0.0415058	0.278563	0.139869
CHHDMR	4005	Bd1-1.CHH	Bd1	68090000	68090199	199	hyper	0.995146	0.96577	1	0.978836	0.972561	0.990544	0.969404	0.670807	0.699482	0.84	0.770492	0.466667	0.657459	0.707113	0.331126	0.35782	0.00735294	0.0188679	0.0485437	0.443694	0.504232
CHHDMR	4013	Bd1-1.CHH	Bd1	68218200	68218399	199	hypo	0	NA	1	NA	NA	1	NA	0	0.0714286	0.8	0.1	0.4	0.466667	0.0769231	0.00833333	0	0.261905	0.0559006	0	0.0822368	0.0297619
CHHDMR	4027	Bd1-1.CHH	Bd1	68445900	68446099	199	hypo	0.955182	0.96699	0.988889	0.909091	0.982507	0.975379	0.977124	0.462617	0.600746	0.706522	NA	0.606383	0.659176	0.403509	0.00308642	0.0116448	0.211823	0.333333	0.0600375	0.0342772	0.0789474
CHHDMR	4063	Bd1-1.CHH	Bd1	69049300	69049499	199	hypo	0	0.0188679	0.876404	0.0909091	0.047619	0	0.803738	0	0.010101	0.794643	0	0	0.0208333	0.6125	0.00742574	0.0117647	0.335907	0	0	0	0.298592
CHHDMR	4069	Bd1-1.CHH	Bd1	69138600	69138799	199	hypo	0.666667	0.875	1	0.909091	1	0.757576	0.947368	0.0357143	0.0909091	0	0	0	0.0555556	0	0.0419162	0.00884956	0.428571	0.288462	0.166667	0.175573	0.153846
CHHDMR	4082	Bd1-1.CHH	Bd1	69361600	69361799	199	hypo	0.954545	0.956522	0.969925	0.972414	0.969828	0.979532	0.971616	0.604651	0.72	0.88	0.943548	0.917098	0.881944	0.904899	0.010989	0.0697674	0.34153	0.223358	0.220676	0.261429	0.192456
CHHDMR	4092	Bd1-1.CHH	Bd1	69530200	69530399	199	hypo	0	0.802326	0.933333	1	0.619048	0.571429	0	0	0.593023	0.833333	0.75	0.592105	0.611111	0	0.00671141	0.250923	0.308057	0.555556	0.277567	0.310204	0
CHHDMR	4150	Bd1-1.CHH	Bd1	70604400	70604599	199	hypo	1	1	1	1	0.883721	0.857143	0.909091	0.0967742	0.272727	0.047619	0	0.1	0	0.0909091	0.00649351	0.0145985	0.309091	0.0776699	0.0601852	0.0980392	0.0434783
CHHDMR	4165	Bd1-1.CHH	Bd1	70747100	70747299	199	hyper	1	0.933333	1	0.6	1	0.571429	1	0.333333	0.142857	0.5	NA	0.5	0.1	0.5	0.205479	0.0135135	0	0.0363636	0	0.0744681	0.097561
CHHDMR	4166	Bd1-1.CHH	Bd1	70791700	70791899	199	hypo	0.3	0.451613	0.528736	0.45098	0	0.297521	0.486239	0.244444	0.214286	0.408451	0.146341	0.142857	0.257732	0.304878	0.0142857	0.166667	0.243902	0.169935	0.25	0.262295	0.21
CHHDMR	4187	Bd1-1.CHH	Bd1	71181300	71181499	199	hypo	0	0	0.777778	1	0.555556	0	0	0.153846	0.0212766	0.692308	0.818182	0.44	0	0.107143	0	0.00469484	0.343137	0.592593	0.148148	0	0
CHHDMR	4188	Bd1-1.CHH	Bd1	71182100	71182299	199	hypo	1	1	1	NA	NA	0.666667	1	0	1	0.666667	NA	NA	0.5	1	0.0105263	0.0857143	0.207547	0.047619	0.0357143	0.25	0.194805
CHHDMR	4196	Bd1-1.CHH	Bd1	71352000	71352199	199	hyper	0.51497	0	0.157895	0	0.111111	0	0.103448	0.304688	0	0.0952381	0	0.0909091	0	0.12766	0.286813	0.0241692	0.0198675	0	0.0877193	0.101322	0.142857
CHHDMR	4198	Bd1-1.CHH	Bd1	71385600	71385799	199	hyper	0.9	0.785714	0.923077	NA	0.769231	0.944444	0.857143	0.333333	1	0.272727	NA	0.25	0.741935	0.25	0.265625	0.0952381	0	NA	0.0909091	0.357143	0.258065
CHHDMR	4221	Bd1-1.CHH	Bd1	71908800	71908999	199	hypo	0	0.125	1	1	0	1	0	0.030303	0	0.875	0.571429	0	0.666667	0	0.0151515	0	0.283019	0	0	0.0441176	0
CHHDMR	4241	Bd1-1.CHH	Bd1	72286200	72286399	199	hypo	1	1	1	NA	1	1	1	0.722222	1	0.666667	1	NA	NA	NA	0.015625	0.123596	0.295082	0.142857	0.0576923	0.1875	0
CHHDMR	4293	Bd1-1.CHH	Bd1	73349300	73349499	199	hypo	0.833333	0.909091	0.9375	NA	1	0.866667	1	0.4375	0.5625	0.555556	NA	0.666667	1	0.294118	0.0135135	0	0.290909	NA	0.116279	0.409091	0
CHHDMR	4304	Bd1-1.CHH	Bd1	73490400	73490699	299	hyper	0.917808	0.928571	0.973333	0.894737	0.884615	0.84	0.905882	0.677419	0.685185	0.719298	0.615385	0.466667	0.727273	0.583333	0.410526	0.00533333	0.0113636	0	0.0555556	0.0227273	0.008
CHHDMR	4311	Bd1-1.CHH	Bd1	73574700	73574899	199	hypo	1	1	1	1	1	1	1	0.521739	0.8	0.857143	0.8	0.666667	0.727273	0.684211	0.0172414	0.0142857	0.220339	0.037037	0	0.0246914	0.0119048
CHHDMR	4326	Bd1-1.CHH	Bd1	74092800	74092999	199	hypo	0	0.5	0	NA	NA	0	0	0.681818	0.3	0.694444	0.971429	1	0.8	0.858268	0.0379147	0.257576	0.550943	0.446809	0.532609	0.4	0.314815
CHHDMR	4332	Bd1-1.CHH	Bd1	74264300	74264499	199	hypo	0.666667	0.5	1	0.4	0.5	0.5625	0.659091	0	0.0434783	0.153846	0	0	0.0434783	0.27027	0.0208333	0.101852	0.279412	0	0.317073	0.0901639	0.339056
CHHDMR	4333	Bd1-1.CHH	Bd1	74292500	74292699	199	hyper	0.04	0.00793651	0	0	0	0	0.0131579	0.0357143	0	0	0	0.030303	0	0	0.361702	0.00444444	0.00775194	0	0	0.0105263	0
CHHDMR	4335	Bd1-1.CHH	Bd1	74308200	74308399	199	hypo	0	0	0.75	1	0.5	0.545455	0.75	0.0909091	0	0.25	0	0	0	0	0	0.368421	0.34375	0	0.117647	0.0357143	0
CHHDMR	4350	Bd1-1.CHH	Bd1	74609800	74609999	199	hypo	0.95082	1	1	1	0.666667	1	0.956522	0.75	0.8	0.8125	0.896552	1	0.875	0.894737	0.0315399	0.0116959	0.212121	0.0138249	0.028169	0.0165746	0.056872
CHHDMR	4373	Bd1-1.CHH	Bd2	328300	328499	199	hypo	0	0	NA	NA	NA	0	0	0.2	0.111111	0.5	NA	NA	0	0.2	0	0	0.471698	0	0	0	0
CHHDMR	4387	Bd1-1.CHH	Bd2	759000	759299	299	hyper	0.977528	0.97193	0.997613	0.985612	0.94362	0.982709	0.969365	0.646465	0.718232	0.701389	0.71123	0.584906	0.756757	0.651613	0.378855	0.0105485	0.00236407	0.0377358	0.0218069	0.0130208	0.0308285
CHHDMR	4421	Bd1-1.CHH	Bd2	1766300	1766499	199	hypo	0.8	1	1	NA	0.777778	0.636364	0.777778	0.9375	1	1	NA	0.6	0.944444	1	0	0.0736842	0.352113	0	0.117647	0.0864662	0.148936
CHHDMR	4435	Bd1-1.CHH	Bd2	1990700	1990899	199	hypo	0.565217	0.45	1	0.666667	0.833333	0.688889	0.571429	0.6875	0.375	0.666667	NA	0.571429	0.684211	0.6	0.0413223	0.21519	0.512195	0.25	0.622642	0.319277	0.182927
CHHDMR	4466	Bd1-1.CHH	Bd2	2549400	2549599	199	hyper	0.903226	0.875	0.875	1	0.821429	0.75	0.75	0.75	0	0	NA	0	0	0.1	0.308057	0.312821	0.016	0.411765	0.181287	0.382979	0.17931
CHHDMR	4506	Bd1-1.CHH	Bd2	3527900	3528099	199	hypo	0.909091	0.666667	1	NA	1	0.949367	NA	0.425532	0.75	0.607843	NA	0.7	0.635417	NA	0.020202	0	0.246914	NA	0.17037	0.206522	NA
CHHDMR	4510	Bd1-1.CHH	Bd2	3571900	3572099	199	hypo	0.82	1	0.909091	1	0.75	0.777778	0.8	0.616667	0.268293	0.896552	0.378378	0.727273	0.659091	0.382353	0.0268949	0.0354331	0.218543	0.032	0.0210526	0.0196078	0.0633484
CHHDMR	4537	Bd1-1.CHH	Bd2	4219300	4219599	299	hypo	0.55	0.724138	0.93617	1	0.4	0.809524	0.333333	0.846154	0.642857	0.647059	1	0.5	0.166667	1	0.0186916	0.0347826	0.327189	0.05	0.0277778	0.181818	0.016129
CHHDMR	4539	Bd1-1.CHH	Bd2	4294000	4294199	199	hypo	0.896552	0.757576	0.928571	0.619048	0.909091	0.761905	0.555556	0.181818	0.142857	0.0909091	0.166667	0.230769	0.142857	0	0	0.174194	0.318182	0.215278	0.211429	0.28	0.227273
CHHDMR	4549	Bd1-1.CHH	Bd2	4442800	4442999	199	hyper	0.222222	0	0	0	0	0	0	0.176471	0	0	0	0	0	0	0.275	0	0	0	0	0	0
CHHDMR	4552	Bd1-1.CHH	Bd2	4465100	4465299	199	hyper	1	0.857143	1	0.888889	0.952381	0.863636	1	0.212121	0.0714286	0	0	0.259259	0.12	0.172414	0.247557	0.165605	0.00990099	0.0452489	0.145749	0.178947	0.181452
CHHDMR	4562	Bd1-1.CHH	Bd2	4662700	4662899	199	hypo	0	0.0327869	0.136364	0.185185	0.111111	0.333333	0.348485	0.0625	0.125	0.2	0.0555556	0.5	0.333333	0.275	0.00952381	0.108571	0.448	0.168831	0.216216	0.383562	0.196653
CHHDMR	4596	Bd1-1.CHH	Bd2	5083600	5083799	199	hypo	0.25	0	0.384615	0.285714	0.48	0.510638	0.518519	0.0833333	0.25	0	0	0	0.0714286	0.272727	0	0.0555556	0.697674	0.0769231	0.563218	0.547368	0.698113
CHHDMR	4629	Bd1-1.CHH	Bd2	5681600	5681799	199	hypo	0.0731707	0.266667	0.4	NA	0.142857	0.857143	0.1875	0.0909091	0.333333	0.5	NA	0.25	0.428571	0.45	0.0229885	0.0634921	0.336364	NA	0.307692	0.208791	0.122137
CHHDMR	4645	Bd1-1.CHH	Bd2	5867500	5867699	199	hyper	0.962963	0.940678	0.986667	0.943396	0.979167	0.976378	0.984127	0.766667	0.862745	0.73913	0.904762	0.782609	0.842105	0.835821	0.588517	0.0513834	0	0.0142857	0.00518135	0.309091	0.254335
CHHDMR	4655	Bd1-1.CHH	Bd2	6059500	6059699	199	hypo	0	0.923529	0.94382	0.953704	0.949749	0.953846	0.934959	0	0.715447	0.555556	0.815217	0.746753	0.625954	0.675676	0.0163934	0.273077	0.453608	0.428884	0.304965	0.420273	0.297665
CHHDMR	4666	Bd1-1.CHH	Bd2	6367100	6367299	199	hypo	0.888889	1	0.888889	NA	0.866667	0.833333	0.8	0	0	0.5	NA	0.0833333	0	0	0	0	0.416667	NA	0	0	0.0238095
CHHDMR	4691	Bd1-1.CHH	Bd2	6921000	6921199	199	hypo	1	1	1	1	NA	1	1	1	1	0.75	1	NA	1	0.6	0	0	0.458333	0.0416667	NA	0.571429	0.0555556
CHHDMR	4697	Bd1-1.CHH	Bd2	6985000	6985199	199	hypo	0.961905	0.974729	1	0.942308	0.990476	0.835616	0.892308	0.508197	0.520833	0.76	0.933333	0.924528	0.894737	0.928571	0	0.047619	0.483516	0	0.0377358	0.0421053	0.00869565
CHHDMR	4699	Bd1-1.CHH	Bd2	7030200	7030399	199	hypo	0.975207	0.337838	0.4	0.28	1	0.484848	0.453237	0.78836	0.288136	0.382979	0.323077	0.888889	0.448276	0.426901	0.0118421	0.107011	0.293617	0.24055	0.00526316	0.155689	0.166008
CHHDMR	4723	Bd1-1.CHH	Bd2	7488800	7488999	199	hyper	0.356061	0.011236	0	0	0.025	0.0526316	0	0.311475	0.0294118	0.1	0	0	0.0689655	0	0.336066	0	0	0	0.0105263	0	0
CHHDMR	4727	Bd1-1.CHH	Bd2	7513600	7513799	199	hypo	0.8	NA	1	NA	0.939394	0.954545	NA	0.235294	NA	0.714286	NA	0.166667	0.307692	NA	0.0129151	NA	0.294118	NA	0.0418251	0.0853659	NA
CHHDMR	4735	Bd1-1.CHH	Bd2	7614400	7614599	199	hypo	0.950355	0.9	0.860465	1	0.758621	0.211538	0.625	0.625	0.7	0.555556	0.8	0.413793	0.0892857	0.125	0.0152542	0.016129	0.271523	0	0.309353	0.0353535	0.2
CHHDMR	4747	Bd1-1.CHH	Bd2	7891800	7891999	199	hyper	0	0.235294	0.846154	0.272727	0.5	0.136364	0.047619	0.148148	0.0243902	0.5	0.115385	0	0.127907	0.152542	0.306667	0.131004	0.00884956	0.161017	0.380952	0.31592	0.321739
CHHDMR	4749	Bd1-1.CHH	Bd2	7955000	7955299	299	hypo	0.809524	0.666667	0.692308	0	0	0.5	1	0.102564	0	0.125	0	1	0.217391	0.0714286	0.00625	0	0.369863	0	0.326087	0.121212	0.0879121
CHHDMR	4767	Bd1-1.CHH	Bd2	8250300	8250499	199	hypo	1	1	0.875	0.666667	0.666667	0.727273	1	0.745455	0.933333	0.636364	0.636364	0.714286	0.9375	0.8125	0.0180412	0	0.233766	0.0106383	0.371429	0.164384	0.0127389
CHHDMR	4769	Bd1-1.CHH	Bd2	8267100	8267299	199	hypo	0.605505	0	0.717391	NA	0.5	0	0	0.590909	NA	0.521277	NA	1	1	1	0.0138889	0	0.379592	1	0.1	0.0416667	0.147059
CHHDMR	4785	Bd1-1.CHH	Bd2	8455100	8455299	199	hypo	0.928571	0.75	1	NA	1	1	1	0.931034	0.857143	1	NA	0.777778	0.666667	1	0.0266667	0	0.254237	NA	0.0769231	0	0.25
CHHDMR	4814	Bd1-1.CHH	Bd2	8835900	8836099	199	hypo	0.714286	0	1	NA	0.8	0.65	0.333333	0.0869565	0.275	0.925	0	0.614035	0.566667	0.58427	0	0.0353698	0.339506	0	0.175355	0.222222	0.0934066
CHHDMR	4869	Bd1-1.CHH	Bd2	9463600	9463799	199	hypo	0	0.148148	0.75	0	0	0.846154	0	0	0.428571	0.791667	0	0	0.678571	0.0555556	0.00632911	0.288618	0.288043	0	0.0070922	0.346847	0
CHHDMR	4874	Bd1-1.CHH	Bd2	9504200	9504499	299	hypo	0.888889	0.824561	0.961538	1	0.95122	0.95122	0.920354	0.857143	0.724138	1	1	0.882353	0.769231	0.782051	0.0131004	0.168831	0.38843	0.25	0.284946	0.147368	0.157807
CHHDMR	4878	Bd1-1.CHH	Bd2	9538100	9538299	199	hypo	0.848168	0.978571	1	0.987013	0.966667	0.940741	0.955414	0.351351	0.642857	0.833333	0.56	0.764706	0.628571	0.675676	0.0255474	0.0384615	0.242604	0.0413223	0.0327869	0.0578947	0.04329
CHHDMR	4906	Bd1-1.CHH	Bd2	9831900	9832099	199	hyper	0.965517	0.980614	0.983516	0.956845	0.990521	0.960714	0.979964	0.733333	0.612	0.688889	0.579646	0.584071	0.530612	0.732877	0.534884	0.0212072	0	0.0767327	0.0232558	0.0823799	0.319749
CHHDMR	4922	Bd1-1.CHH	Bd2	9977300	9977499	199	hyper	0.9375	0.94697	0.975	0.909091	0.9375	0.891304	0.941748	0.5	0.738095	0.740741	0.8125	0.823529	0.862069	0.849057	0.301887	0.0121457	0.0300752	0.012987	0.0307692	0.0128205	0.00564972
CHHDMR	4924	Bd1-1.CHH	Bd2	10008500	10008699	199	hyper	0.747899	0	0	0	0	0	0.03125	0.52	0	0.0454545	0	0	0.0909091	0.0217391	0.70948	0	0	0	0	0	0.00809717
CHHDMR	4982	Bd1-1.CHH	Bd2	10788000	10788199	199	hyper	0.676471	0.94	0.9375	1	0.8	0.847826	0.931507	0.564935	0.485149	0.846154	0.378378	0.568182	0.457831	0.451777	0.228571	0.18956	0.0104712	0.178082	0.274038	0.198582	0.101993
CHHDMR	4994	Bd1-1.CHH	Bd2	10987500	10987699	199	hypo	0.352941	0.352941	0.5	0.5	0.5	0.714286	0.166667	0	0.0769231	0.666667	0.272727	0	0.363636	0	0.0223464	0.15331	0.292208	0.0913043	0.0985222	0.117834	0.0534351
CHHDMR	4995	Bd1-1.CHH	Bd2	11010100	11010299	199	hypo	0.983146	0.982379	0.951923	0	0.963563	0.9801	0.978723	0.834862	0.89375	0.776316	0.0340909	0.948276	0.893333	0.902098	0.0153846	0.0103093	0.335106	0.00943396	0.00680272	0.186761	0.468864
CHHDMR	5016	Bd1-1.CHH	Bd2	11235800	11235999	199	hypo	1	0.916667	1	NA	0.666667	1	0.6	0.545455	0.363636	0.857143	NA	0.5	0.428571	0.25	0.00909091	0.0867347	0.233333	NA	0.09375	0.219512	0.144737
CHHDMR	5025	Bd1-1.CHH	Bd2	11371000	11371199	199	hypo	0.809524	0.333333	1	0.777778	1	1	0.842105	0.716418	0.47619	0.65625	0.842105	0.470588	0.418605	0.472727	0.0134048	0.0346821	0.335821	0.137931	0.0336134	0.228261	0.193548
CHHDMR	5090	Bd1-1.CHH	Bd2	12499700	12499899	199	hypo	1	0.740157	0.824176	0.855072	0.942029	0.657658	0.981928	0.831579	0.541667	0.62	0.75	0.666667	0.514706	0.972973	0.0160256	0.141264	0.22905	0.283582	0.267241	0.155738	0.031185
CHHDMR	5094	Bd1-1.CHH	Bd2	12599800	12599999	199	hypo	0	0.27907	0.52	0.111111	0.43125	0.361702	0	0	0.0333333	0.179487	0.0196078	0.101562	0.0606061	0	0	0.374251	0.532189	0.575221	0.528682	0.465969	0
CHHDMR	5104	Bd1-1.CHH	Bd2	12781000	12781199	199	hypo	0.977099	0.971698	1	0.953216	0.991632	0.957207	0.952239	0.475	0.617647	0.77551	0.8125	0.642105	0.674419	0.65873	0.0163934	0	0.517241	0	0	0.192771	0.294118
CHHDMR	5106	Bd1-1.CHH	Bd2	12827600	12827799	199	hypo	0	0.854839	0.857143	0	0.346154	0.615385	0.47619	0.0277778	0.425926	0.0952381	0	0.172414	0.142857	0.290909	0.028777	0.448698	0.638462	0	0.304904	0.608169	0.440072
CHHDMR	5130	Bd1-1.CHH	Bd2	13329800	13329999	199	hypo	0.984127	0.992424	1	1	0.979167	0.955224	0.980952	0.846154	0.747664	0.777778	0.933333	0.666667	0.9	0.777778	0.0163043	0.0129199	0.222222	0.105556	0	0.196507	0.0275229
CHHDMR	5143	Bd1-1.CHH	Bd2	13710600	13710799	199	hypo	0.976471	0.957219	1	0.941176	0.987879	0.953846	0.954545	0.714286	0.68	0.655172	0.766667	0.676471	0.676471	0.662162	0.041806	0.0688576	0.21447	0.198895	0.13986	0.15534	0.12076
CHHDMR	5152	Bd1-1.CHH	Bd2	13920900	13921099	199	hypo	0.0714286	0.846154	0.333333	NA	0	0.214286	0.272727	0.0869565	0.77027	0.565217	NA	0	0.557377	0.705128	0.0140845	0.0636792	0.253298	NA	0	0.352459	0.292978
CHHDMR	5210	Bd1-1.CHH	Bd2	15205000	15205199	199	hypo	0.917476	0.973134	0.981481	0.986301	0.994975	0.958333	0.974026	0.0598291	0.197183	0.395349	0.142857	0.317829	0.0761905	0.333333	0.00539084	0.0108225	0.352332	0	0.0147601	0.00401606	0.0186667
CHHDMR	5261	Bd1-1.CHH	Bd2	16163700	16163899	199	hypo	0.744898	0.648855	0.609375	0.642857	0.619048	0.660714	0.673913	0.591549	0.618421	0.571429	0.7	0.8	0.458333	0.693182	0.0230263	0.0674157	0.216783	0.266667	0.164384	0.0923913	0.0474684
CHHDMR	5286	Bd1-1.CHH	Bd2	16602100	16602299	199	hypo	1	0.884615	0.928571	1	1	1	1	0.333333	0.5	0.333333	NA	1	1	0.875	0.0217391	0.357143	0.416667	0	0.333333	0.30137	0.308943
CHHDMR	5290	Bd1-1.CHH	Bd2	16698700	16698899	199	hypo	0.392857	0.142857	0.666667	0	0	0.567568	0.133333	0.162162	0.0833333	0.3	0	0	0.423077	0	0.0214286	0.0740741	0.214286	0	0	0.146341	0
CHHDMR	5325	Bd1-1.CHH	Bd2	17235500	17235699	199	hypo	0.0454545	0.0952381	0.733333	NA	0	0	0.0833333	0	0	0.638889	NA	0	0	0	0	0.0204082	0.32	NA	0.342105	0	0.166667
CHHDMR	5330	Bd1-1.CHH	Bd2	17373100	17373299	199	hypo	0.951049	0.931034	0.983871	0.949367	0.987755	0.994764	0.990244	0.694915	0.696203	0.774648	0.754386	0.833333	0.641026	0.643564	0.0184049	0.206406	0.240964	0.0117647	0.0872727	0.103093	0.0597826
CHHDMR	5331	Bd1-1.CHH	Bd2	17384000	17384199	199	hypo	0.428571	1	1	NA	NA	NA	1	0	1	0.5	NA	NA	0	0.333333	0	0	0.40625	NA	NA	0	0.105263
CHHDMR	5357	Bd1-1.CHH	Bd2	17754400	17754699	299	hypo	1	0.75	1	1	1	1	0.96	0.333333	0.714286	0.4	1	0	0.571429	0.631579	0.0145985	0.131579	0.425532	0.22449	0.12	0.119565	0.149533
CHHDMR	5371	Bd1-1.CHH	Bd2	18001200	18001399	199	hyper	0.916667	0.909091	1	0.8	1	1	1	0.923077	1	1	0.8125	0.954545	0.875	0.923077	0.272933	0.0222805	0.026738	0.020649	0.0363636	0.0443548	0.0179558
CHHDMR	5383	Bd1-1.CHH	Bd2	18161700	18161899	199	hypo	0.979021	0.653061	0.646667	0.796813	0.793991	0.546012	0.744262	0.892683	0.580786	0.571429	0.638191	0.717703	0.34058	0.65035	0.00541712	0.116176	0.209906	0.13986	0.212162	0.167139	0.171926
CHHDMR	5407	Bd1-1.CHH	Bd2	18559600	18559799	199	hypo	0	0.818182	1	1	1	1	0.571429	0.25	0.181818	1	0	0	0	0	0.00990099	0	0.80597	0	0.11	0	0
CHHDMR	5421	Bd1-1.CHH	Bd2	18835600	18835799	199	hypo	0.952381	0.982301	0.987603	0.985401	0.96934	0.983092	0.986717	0.315789	0.733333	0.804348	0.9375	0.928571	0.934066	0.825581	0.00900901	0.0986301	0.23622	0.0324324	0.0291262	0.326816	0.262391
CHHDMR	5439	Bd1-1.CHH	Bd2	19187800	19187999	199	hypo	0.545455	0.277778	0.428571	1	1	0.923077	0.7	0	0.130435	0	0.4	0.5	0.2	0.222222	0.0075188	0.148438	0.22807	0.418605	0	0.25	0.23622
CHHDMR	5449	Bd1-1.CHH	Bd2	19513300	19513499	199	hypo	0.96679	0.958231	0.987654	0.930612	0.983333	0.953795	0.935354	0.261538	0.581633	0.857143	0.58	0.842105	0.524752	0.607843	0	0.0380952	0.553191	0.0289855	0	0.0560748	0
CHHDMR	5454	Bd1-1.CHH	Bd2	19538300	19538499	199	hypo	0.628205	0.818182	0.847826	0.882353	0.859649	0.833333	0.825	0.313725	0.442953	0.575342	0.546667	0.523256	0.484375	0.647059	0.0251889	0.12973	0.331797	0.287402	0.301471	0.20331	0.26
CHHDMR	5492	Bd1-1.CHH	Bd2	20142100	20142299	199	hypo	0	0.803922	0.761905	0.820513	0.893333	0.637931	0.759494	0	0.625	0.428571	0.235294	0.2	0.371429	0.4	0.00862069	0.227437	0.328358	0.168196	0.236641	0.251572	0.334071
CHHDMR	5529	Bd1-1.CHH	Bd2	20507400	20507599	199	hypo	0	0.923077	0.777778	1	0.857143	1	0.75	0	0.333333	1	0	0	0.5	0	0	0.135922	0.25	0.108108	0.25	0.103226	0.0431034
CHHDMR	5532	Bd1-1.CHH	Bd2	20566400	20566599	199	hypo	0.333333	NA	0	NA	NA	0	NA	0.166667	0.324324	0.5	0.526316	0.233333	0.243902	0.333333	0	0.0606061	0.27907	0.0285714	0	0.150685	0.0483871
CHHDMR	5545	Bd1-1.CHH	Bd2	20720200	20720399	199	hypo	0.652174	0	0	NA	NA	NA	0	0.05	0.473684	0.65	0.428571	0.666667	0.882353	0.615385	0.0186335	0.278351	0.280488	0.529412	0.428571	0.263158	0.144444
CHHDMR	5576	Bd1-1.CHH	Bd2	21411800	21411999	199	hypo	0.138889	0.0441176	0.451613	0.0512821	0.150943	0.15	0.342857	0.121622	0	0.424242	0	0.0227273	0.105263	0.213333	0.0046729	0.0277778	0.240741	0	0	0.0753769	0.0878049
CHHDMR	5590	Bd1-1.CHH	Bd2	21549200	21549399	199	hypo	0.0727273	0.116466	0.289474	0.490909	0.196532	0.104839	0.164975	0.0652174	0.137681	0.333333	0.307692	0.34	0.0543478	0.0531915	0.0307692	0.136538	0.362205	0.152174	0.0714286	0.0642857	0.0684932
CHHDMR	5600	Bd1-1.CHH	Bd2	21603100	21603299	199	hypo	0.960894	0.953795	0.953704	0.9625	0.961538	0.963351	0.940678	0.75	0.707071	0.717949	0.865385	0.6	0.775362	0.748201	0.0302326	0.103565	0.27193	0.0625	0.2	0.0718085	0.0917782
CHHDMR	5623	Bd1-1.CHH	Bd2	21811300	21811499	199	hypo	0	0.69697	0.8	1	0	0.6	0.767442	0.0333333	0.380952	0.37037	0.666667	0	0.390625	0.36	0	0.028169	0.35	0	0	0.173913	0.198675
CHHDMR	5639	Bd1-1.CHH	Bd2	22067500	22067699	199	hypo	1	0.9	1	1	NA	1	1	0.642857	0.833333	1	1	NA	1	0.9	0	0.0588235	0.466667	0.0625	0	0.26087	0.0364964
CHHDMR	5649	Bd1-1.CHH	Bd2	22233000	22233199	199	hypo	0.879357	0.958722	0.987448	0.988095	0.96648	0.983988	0.987371	0.709091	0.886792	0.83871	0.782609	0.925234	0.861905	0.81	0.0169492	0.360262	0.633333	0.00724638	0.00653595	0.296849	0.223404
CHHDMR	5662	Bd1-1.CHH	Bd2	22463100	22463299	199	hypo	0.75	0.823529	0.727273	NA	NA	0.5	0.75	0	0.5	0.5	NA	NA	0	0	0	0.125	0.381818	NA	NA	0	0.230769
CHHDMR	5676	Bd1-1.CHH	Bd2	22626000	22626199	199	hypo	NA	1	0.833333	0	1	1	1	NA	NA	NA	NA	NA	NA	NA	0.0108696	0.222904	0.345133	0.530303	0.236842	0.340782	0.269481
CHHDMR	5680	Bd1-1.CHH	Bd2	22697300	22697499	199	hypo	0.882353	0.960674	0.972222	0.968	0.963303	0.949239	0.941406	0.555556	0.59375	0.470588	0.63964	0.487805	0.484277	0.468927	0.0114613	0.19389	0.222664	0.195402	0.199584	0.205584	0.164919
CHHDMR	5694	Bd1-1.CHH	Bd2	22900500	22900699	199	hypo	0.970874	0.851351	1	0.939394	1	0.927273	0.961905	0.75	0.70068	0.763441	0.835821	0.714286	0.73399	0.736364	0.00669643	0.16411	0.297052	0.19403	0.217765	0.18873	0.122911
CHHDMR	5776	Bd1-1.CHH	Bd2	24164400	24164599	199	hypo	1	0.916667	1	1	1	0.928571	1	0.0714286	0.21875	0.444444	1	0.5	0.4	0.333333	0.0368852	0.194332	0.569231	0	0.31	0.232558	0.21978
CHHDMR	5784	Bd1-1.CHH	Bd2	24342300	24342499	199	hypo	0.888889	1	0.5	1	0.5	NA	0.75	0	0.882353	0.823529	0	0.533333	0	0.6	0.00952381	0.453125	0.351648	0.153846	0.0322581	0.015873	0.0869565
CHHDMR	5790	Bd1-1.CHH	Bd2	24449600	24449799	199	hypo	1	0.619718	0.807018	0.921569	1	0.83871	0.861386	0.763158	0.453488	0.670455	0.703125	0.836735	0.678161	0.6	0.025641	0.280549	0.362403	0.396166	0	0.489583	0.289941
CHHDMR	5804	Bd1-1.CHH	Bd2	24581100	24581299	199	hyper	0.446866	0.944724	1	0.979798	0.942857	0.95283	0.980263	0.310924	0.76	0.659091	0.6	0.3625	0.675325	0.886957	0.337349	0.00854701	0.00672646	0	0	0.0052356	0.00425532
CHHDMR	5818	Bd1-1.CHH	Bd2	24724100	24724299	199	hypo	0.977221	0.987931	0.995927	0.993407	0.984187	0.984887	0.987352	0.31	0.336538	0.814607	0.865559	0.680785	0.798969	0.856838	0.0324232	0.00720721	0.583573	0.509591	0.217626	0.250528	0.493529
CHHDMR	5824	Bd1-1.CHH	Bd2	24788700	24788899	199	hypo	0	0.928571	1	NA	NA	0	0	0	0.125	0	NA	NA	0.2	0	0	0.280928	0.33557	0.367347	0.25	0	0.147287
CHHDMR	5825	Bd1-1.CHH	Bd2	24797900	24798099	199	hyper	0.9	0.955556	0.981818	1	0.933333	1	0.969231	0.666667	0.636364	0.461538	0.75	0.6875	0.454545	0.647059	0.266667	0	0	0	0	0.0363636	0.018797
CHHDMR	5835	Bd1-1.CHH	Bd2	24941500	24941699	199	hypo	0.939189	0.901869	0.885057	0.4	0.940299	0.983784	0.127451	0.612245	0.712727	0.683168	0.205882	0.507042	0.68559	0.04	0.00967118	0.280684	0.3	0.0785714	0.174917	0.0486577	0.236726
CHHDMR	5873	Bd1-1.CHH	Bd2	25625300	25625499	199	hyper	0.793722	0.946939	0.978261	0.931579	0.895833	0.850649	0.917981	0.375887	0.344595	0.310345	0.54321	0.177419	0.209877	0.331169	0.207692	0.0941176	0.0125	0.0606061	0.0201613	0.0501792	0.0531136
CHHDMR	5879	Bd1-1.CHH	Bd2	25738200	25738399	199	hypo	0.971429	0.974359	1	0.953488	0.962963	0.987654	0.944444	0.636364	0.641509	0.965517	0.878049	0.849057	0.745763	0.705882	0	0.154054	0.391837	0.271429	0.231608	0.278481	0.165323
CHHDMR	5886	Bd1-1.CHH	Bd2	25813800	25813999	199	hypo	0.666667	1	1	0.5	NA	NA	1	0.5	0.7	0.75	0.333333	0.5	1	0.4	0.0121951	0.259259	0.756098	0.6	0.1875	0.333333	0
CHHDMR	5898	Bd1-1.CHH	Bd2	25974700	25974899	199	hypo	0.4375	0.842105	0.870968	1	1	0	0.647059	0.214286	0.862069	0.868421	0.75	0.777778	0	0.711111	0.0227273	0.15	0.331169	0.0645161	0.0526316	0	0.0666667
CHHDMR	5919	Bd1-1.CHH	Bd2	26507900	26508099	199	hypo	0.944954	0.85	1	1	1	0.75	0.947368	0.628571	0.52381	0.647059	0.592593	0.857143	0.777778	0.45	0.0322581	0.153846	0.283019	0.16129	0.363636	0.111111	0.153846
CHHDMR	5924	Bd1-1.CHH	Bd2	26523000	26523199	199	hypo	1	NA	1	1	NA	0	NA	0.369565	NA	0.647059	1	NA	0	NA	0.0172414	NA	0.32	0.5	NA	0.1	NA
CHHDMR	5934	Bd1-1.CHH	Bd2	26631900	26632099	199	hyper	1	NA	1	NA	NA	1	NA	1	NA	1	NA	NA	0	NA	0.583333	NA	0.0188679	NA	NA	0	NA
CHHDMR	5951	Bd1-1.CHH	Bd2	26839900	26840099	199	hypo	0.571429	1	0.666667	NA	NA	NA	1	0.2	NA	1	NA	NA	NA	NA	0	0	0.487805	NA	NA	NA	0
CHHDMR	5956	Bd1-1.CHH	Bd2	26923200	26923399	199	hyper	0.941341	0.7	0.973913	0.875	0.916667	0.852632	0.875	0.852174	0.125	0.823529	1	1	0.666667	0.6	0.586826	0	0.0119048	0	0	0.0909091	0.628205
CHHDMR	5962	Bd1-1.CHH	Bd2	27062700	27062899	199	hyper	0.945783	0.941781	0.974576	0.940928	0.948012	0.895652	0.975877	0.473684	0.62963	0.809524	0.604167	0.788462	0.597222	0.654762	0.319444	0.121212	0	0.12	0.0163934	0.0406504	0.31016
CHHDMR	5998	Bd1-1.CHH	Bd2	27664600	27664799	199	hyper	0.947368	0.991597	1	1	1	1	0.962185	0.833333	0.822148	0.878378	0.802083	0.863281	0.681818	0.857651	0.361702	0.0140406	0.0162866	0	0.00682594	0.025641	0.00578035
CHHDMR	6008	Bd1-1.CHH	Bd2	27871500	27871699	199	hypo	0.939024	0.990991	1	0.9	0.985663	1	0.934028	0.717172	0.68	0.672414	0.285714	0.720721	0.666667	0.659091	0.0322581	0.18018	0.40625	0.0625	0.0275862	0	0.320158
CHHDMR	6025	Bd1-1.CHH	Bd2	28333400	28333599	199	hyper	0.85	0.978261	1	NA	0.965517	1	0.970588	0.444444	0.533333	0.333333	NA	0.2	0.4	0.416667	0.269737	0.0421687	0.025641	NA	0	0.227273	0.05
CHHDMR	6035	Bd1-1.CHH	Bd2	28551000	28551199	199	hypo	1	1	1	NA	1	1	1	0.555556	0.6	0.5	1	0.75	0.5	0.6	0.0337079	0.0526316	0.333333	0	0.0645161	0	0.00680272
CHHDMR	6052	Bd1-1.CHH	Bd2	29002300	29002499	199	hypo	0.5	1	1	NA	NA	1	1	0.5	0.25	0.333333	NA	NA	1	0.333333	0	0.0789474	0.52	NA	NA	0.5	0.0491803
CHHDMR	6059	Bd1-1.CHH	Bd2	29100300	29100499	199	hypo	0.909091	1	1	NA	1	NA	1	0.625	0.7	0.8	NA	0.5	NA	0.4	0	0.0824742	0.298507	NA	0	NA	0.169492
CHHDMR	6070	Bd1-1.CHH	Bd2	29279300	29279499	199	hypo	0.75	0.642857	1	NA	0.5	1	0.826087	0.1875	0.115385	0	NA	0.075	NA	0.210526	0.0126582	0.0279503	0.421053	NA	0.0120482	0.190476	0.109091
CHHDMR	6076	Bd1-1.CHH	Bd2	29385000	29385199	199	hypo	0.84375	1	1	NA	1	NA	1	0.44	0.578947	0.764706	NA	0.545455	0	0.560976	0.0211864	0.0682594	0.489362	NA	0.163265	0.25	0.026178
CHHDMR	6103	Bd1-1.CHH	Bd2	29956400	29956599	199	hypo	0.945946	1	1	NA	1	1	0.837838	0.78	0.875	0.9	NA	0.823529	0.789474	0.795918	0.0106838	0.028103	0.27957	0	0.0512821	0.0682927	0.019943
CHHDMR	6173	Bd1-1.CHH	Bd2	31346400	31346599	199	hyper	0.977707	0.963478	0.994872	0.981022	0.969305	0.973929	0.984241	0.590909	0.495763	0.486842	0.660959	0.65283	0.554622	0.636364	0.251786	0.0566298	0.019685	0.0332147	0.0181311	0.264505	0.138634
CHHDMR	6192	Bd1-1.CHH	Bd2	31676300	31676499	199	hypo	0.941176	0.8	1	1	0.966667	0.962264	1	0.650794	0.568182	1	0.666667	0.727273	0.757576	0.807692	0.00581395	0.657778	0.695035	0	0.463415	0.0446927	0.0882353
CHHDMR	6217	Bd1-1.CHH	Bd2	32208100	32208299	199	hypo	0.979798	0.917062	0.88189	0.941718	0.951338	0.924125	0.943574	0.538462	0.475472	0.689189	0.576531	0.63745	0.522523	0.515789	0.035461	0.119904	0.355049	0.173042	0.214824	0.142445	0.191045
CHHDMR	6220	Bd1-1.CHH	Bd2	32267100	32267299	199	hypo	0.5	0.666667	1	NA	0.5	1	0.285714	1	1	1	NA	NA	0.5	0.666667	0	0.0454545	0.235294	NA	0.142857	0.0555556	0.0125
CHHDMR	6259	Bd1-1.CHH	Bd2	32857300	32857599	299	hypo	0.962963	0.795699	0.921053	0.972973	0.907895	0.875	0.869565	0.677419	0.743243	0.676471	0.68	0.776316	0.666667	0.765625	0.0126582	0.189696	0.276042	0.155039	0.187151	0.126761	0.146814
CHHDMR	6263	Bd1-1.CHH	Bd2	33007600	33007799	199	hyper	0.831169	0.969529	0.994048	0.996644	0.967442	0.953488	0.971609	0.617647	0.714286	0.817647	0.857143	0.814241	0.680934	0.760274	0.447917	0.0666667	0.0133333	0.0425532	0.0179641	0.0995671	0.259375
CHHDMR	6317	Bd1-1.CHH	Bd2	33978100	33978299	199	hypo	0	0	NA	NA	NA	NA	NA	0	0.444444	0.545455	0	0	0	0	0	0.0272727	0.235772	0.136364	0	0.04	0.0588235
CHHDMR	6321	Bd1-1.CHH	Bd2	33993400	33993599	199	hyper	1	0.945455	0.958333	0.989691	1	0.974359	0.976744	0.781457	0.811688	0.852071	0.843575	0.705584	0.793939	0.692308	0.446483	0.196809	0.00699301	0.0724638	0.0454545	0.323834	0.291667
CHHDMR	6330	Bd1-1.CHH	Bd2	34166600	34166799	199	hypo	0.976608	0.710383	0.78	0.962963	0.854054	0.732323	0.770833	0.85625	0.685535	0.64	0.948718	0.891892	0.680851	0.696203	0.0245614	0.518433	0.702403	0.0383275	0.667742	0.59001	0.60154
CHHDMR	6332	Bd1-1.CHH	Bd2	34174400	34174599	199	hypo	0	0.4	0.87963	0.881356	0.142857	0.806452	0.0140845	0.0392157	0.188889	0.636364	0.595745	0	0.675159	0	0.00369004	0.145729	0.252918	0.104762	0	0.27762	0
CHHDMR	6343	Bd1-1.CHH	Bd2	34302600	34302799	199	hypo	0.434783	0.166667	0.307692	1	1	0.578947	0.888889	0.116667	0.0555556	0.555556	0	0.727273	0.289474	0.263158	0	0.102564	0.254902	0	0	0.235294	0.0857143
CHHDMR	6351	Bd1-1.CHH	Bd2	34363700	34363899	199	hypo	NA	NA	NA	NA	NA	NA	NA	0.517857	0.447368	0.733333	1	0.545455	0.695652	0.571429	0.00362319	0.0785714	0.348214	0.166667	0.104651	0.21466	0.0714286
CHHDMR	6352	Bd1-1.CHH	Bd2	34364300	34364499	199	hyper	0.935484	0.982111	0.965636	NA	1	0.994774	1	0.823529	0.925325	0.939024	NA	1	0.955836	0.6	0.621622	0.0277778	0.00662252	NA	NA	0.0568182	0.4
CHHDMR	6364	Bd1-1.CHH	Bd2	34674600	34674799	199	hyper	0.821429	0.884615	0.833333	0.5	1	0.894737	0.9375	0.222222	0.222222	0.666667	0.142857	0	0.416667	0.166667	0.365217	0.207407	0	0.333333	0.666667	0.301205	0.105263
CHHDMR	6369	Bd1-1.CHH	Bd2	34762800	34762999	199	hypo	0.985386	0.952978	1	1	0.97037	0.956229	0.976562	0.823529	0.719298	0.808511	NA	0.813084	0.715596	0.782178	0.0182927	0.0179641	0.375	0	0.0769231	0	0.0272109
CHHDMR	6382	Bd1-1.CHH	Bd2	35009200	35009499	299	hypo	0.438596	0.46	0.75	0.883721	0.857143	0.5	0.512821	0.037037	0.222222	0.310345	0.291667	0.296296	0.111111	0.303571	0	0.0972222	0.359551	0.097561	0.346405	0	0.264423
CHHDMR	6391	Bd1-1.CHH	Bd2	35121200	35121399	199	hyper	1	0.977987	0.985075	0.984456	0.967066	1	0.978355	1	0.619753	0.718519	0.659664	0.682028	0.5	0.562937	0.72973	0.0271682	0.0095057	0	0.0106383	0	0.0630631
CHHDMR	6420	Bd1-1.CHH	Bd2	35531900	35532099	199	hypo	0.934783	0.939394	0.71875	NA	0.916667	0.961538	0.742857	0.195122	0.290323	0.407407	NA	0.133333	0.473684	0.210526	0.004329	0.010101	0.269663	NA	0	0.411215	0.315789
CHHDMR	6426	Bd1-1.CHH	Bd2	35617500	35617699	199	hypo	0.857143	0.444444	0.54386	0.476923	0	0.428571	0.491071	0.477124	0.0425532	0.375	0.346535	0.206897	0.263158	0.457831	0.0235294	0.0752688	0.346008	0.349057	0	0.205128	0.401942
CHHDMR	6442	Bd1-1.CHH	Bd2	35817300	35817499	199	hyper	0.788571	0.755556	0.860759	NA	0.723684	0.719512	0.00826446	0.674699	0.20339	0.179775	NA	0.703125	0.482759	0.0265487	0.218341	0.0701754	0	NA	0.203125	0.203704	0
CHHDMR	6489	Bd1-1.CHH	Bd2	36557700	36557899	199	hyper	0.847458	0.947917	0.955224	0.949686	0.264706	0.946043	0.823529	0.809524	0.673684	0.7	0.758333	0.507042	0.758929	0.782946	0.389776	0.268868	0	0.00943396	0.864407	0.358025	0.799172
CHHDMR	6496	Bd1-1.CHH	Bd2	36661600	36661799	199	hypo	0.923077	1	1	1	1	1	0.769231	0.5	0.866667	0.7	NA	0.772727	1	1	0.0217391	0.414634	0.362745	0.153846	0.302817	0.485149	0.16
CHHDMR	6520	Bd1-1.CHH	Bd2	37034600	37034799	199	hypo	0.75	0.941176	0.928571	1	NA	1	0.833333	0.25	0.307692	0.6	1	NA	0.769231	0	0.010989	0	0.270833	0.428571	NA	0.0166667	0
CHHDMR	6521	Bd1-1.CHH	Bd2	37038500	37038799	299	hypo	0.972892	0.969359	0.980769	0.987775	0.983051	0.971154	0.98087	0.789855	0.881607	0.851613	0.954198	0.913793	0.879377	0.908759	0.00846262	0.139505	0.260504	0.0219436	0.0353774	0.135878	0.206691
CHHDMR	6523	Bd1-1.CHH	Bd2	37057400	37057599	199	hyper	0.970588	0.975124	0.984064	0.977049	0.957746	0.972603	0.973404	0.872247	0.810726	0.865591	0.972973	0.892105	0.911877	0.956962	0.418699	0.00980392	0.0368098	0.234783	0.0955414	0.156126	0.458128
CHHDMR	6547	Bd1-1.CHH	Bd2	37517300	37517499	199	hypo	0.610063	0.976915	0.992823	0.972826	0.979492	0.96348	0.975895	0.603774	0.52069	0.603053	0.549223	0.606164	0.568807	0.55754	0.00306748	0.0517241	0.408046	0.197628	0.151316	0.0193548	0.308544
CHHDMR	6559	Bd1-1.CHH	Bd2	37613500	37613699	199	hypo	0.898876	0.870968	0.948052	0.94382	0.91453	0.930769	0.804124	0.725	0.738636	0.8	0.896552	0.873016	0.77551	0.733333	0.0201613	0.233434	0.245714	0.178478	0.197753	0.142466	0.167457
CHHDMR	6563	Bd1-1.CHH	Bd2	37666700	37666899	199	hypo	0.526316	1	1	NA	1	1	NA	0	0.666667	0.538462	NA	0	0	NA	0.0260417	0.0208333	0.303922	NA	0.75	0	0
CHHDMR	6583	Bd1-1.CHH	Bd2	37920000	37920299	299	hypo	0.985714	0.984118	0.987705	0.905907	0.977456	0.979981	0.984021	0.69	0.773333	0.767773	0.685552	0.800439	0.800512	0.679012	0.0202899	0.137484	0.237037	0.0253521	0.152475	0.156	0.110315
CHHDMR	6594	Bd1-1.CHH	Bd2	38140700	38140899	199	hypo	0.884615	0.466667	0.833333	0.981818	0.916667	0.75	0.789474	0.428571	0.849057	0.788462	0.208333	0.134615	0.283333	0.135593	0.0104167	0.39	0.360169	0.0393258	0.259259	0.415441	0.00306748
CHHDMR	6600	Bd1-1.CHH	Bd2	38278700	38278899	199	hypo	0.375	0.302326	0.564516	0.5	0.554217	0.426667	0.222222	0	0.142857	0.5	0.25	0.0625	0.3125	0.25	0.031746	0.294278	0.292208	0.438994	0.341716	0.356913	0.203704
CHHDMR	6637	Bd1-1.CHH	Bd2	38839800	38839999	199	hypo	0.4	0	1	1	NA	0.2	1	0.2	0.586207	0.913043	0.625	0.333333	0	0.533333	0	0.467213	0.802083	0.346154	0.297297	0.0571429	0.435714
CHHDMR	6650	Bd1-1.CHH	Bd2	39099300	39099499	199	hypo	1	1	0.4	0.75	0.561644	0.25	0.429907	0.663366	0.613636	0.6	0.909091	0.609589	0.62	0.674312	0.0294906	0.4375	0.45	0.564103	0.277916	0.188406	0.323944
CHHDMR	6679	Bd1-1.CHH	Bd2	39622300	39622499	199	hypo	1	NA	0.8	NA	NA	NA	NA	0.387755	NA	0.844037	NA	NA	NA	NA	0.00396825	NA	0.455312	NA	NA	NA	NA
CHHDMR	6712	Bd1-1.CHH	Bd2	40131900	40132099	199	hypo	0.94382	0.973684	0.985294	0.932	0.975439	0.962121	0.977157	0.73913	0.337209	0.9	0.830769	0.746667	0.734177	0.864	0.0161943	0.0337838	0.472973	0.00877193	0.0457516	0.0145631	0.236735
CHHDMR	6724	Bd1-1.CHH	Bd2	40373300	40373499	199	hypo	0.886792	0.945205	1	1	1	0.869048	0.564103	0.62069	0.576087	1	0.8	0.909091	0.642857	0.62963	0.0168067	0.0419463	0.272727	0.0380952	0.057377	0.00502513	0.204633
CHHDMR	6730	Bd1-1.CHH	Bd2	40467100	40467299	199	hypo	0.0693069	0.0578512	0.162162	0.0384615	0.0196078	0.291667	0.0952381	0.0425532	0	0.0535714	0	0.0470588	0.1875	0.021978	0.0136986	0	0.223404	0	0.0121212	0.125	0.0583942
CHHDMR	6733	Bd1-1.CHH	Bd2	40527000	40527199	199	hypo	0.9	0.985915	0.985915	0.8	0.932692	NA	0.939024	0.692308	0.666667	0.230769	0.333333	0.36	NA	0.756098	0.0119617	0.0145889	0.253247	0.149254	0.212682	NA	0.0222222
CHHDMR	6736	Bd1-1.CHH	Bd2	40587000	40587199	199	hypo	0.95	0.813559	0.888889	NA	0.621622	0	0	0.573427	0.392857	0.270833	0	0.311111	0.190476	0.136364	0.0228311	0.305085	0.315152	0.4	0.300813	0.282051	0.0746269
CHHDMR	6743	Bd1-1.CHH	Bd2	40689300	40689499	199	hypo	0.942029	1	0.958763	1	0.967213	0.833333	1	0.535714	0.75	0.821429	1	0.666667	0.6	1	0.0114068	0.0769231	0.379147	1	0.062069	0	0
CHHDMR	6748	Bd1-1.CHH	Bd2	40779600	40779799	199	hypo	1	1	1	NA	NA	1	1	0.3	1	1	1	0	0.444444	0	0	0.4	0.326923	1	0.415094	0.24	0.353659
CHHDMR	6767	Bd1-1.CHH	Bd2	41057600	41057799	199	hypo	0.829787	0.25	0.5625	NA	NA	0.958333	0.955556	0.340909	0	0.125	NA	NA	0.684211	0.736842	0	0.181818	0.304348	NA	NA	0.0232558	0.0641026
CHHDMR	6774	Bd1-1.CHH	Bd2	41137500	41137699	199	hyper	0.982843	0.978417	0.979339	0.968153	0.975689	0.976096	0.966574	0.618182	0.888235	0.727273	0.56338	0.877395	0.909836	0.962025	0.302083	0	0.0247934	0	0.0337079	0.0153846	0.307692
CHHDMR	6801	Bd1-1.CHH	Bd2	41621400	41621599	199	hypo	0.984615	0.8	1	1	1	1	0.837209	0.310345	0.365385	0.466667	0.25	0.882353	0.4	0.380952	0.031746	0.295567	0.266667	0.037037	0.477778	0.313253	0.16875
CHHDMR	6812	Bd1-1.CHH	Bd2	41831900	41832099	199	hypo	1	1	1	1	0.9	1	0.925926	0.8	1	NA	0.5	1	NA	1	0.0364299	0.107438	0.222008	0.264151	0.319899	0.246914	0.20098
CHHDMR	6813	Bd1-1.CHH	Bd2	41842300	41842499	199	hypo	0.921569	0.966667	1	1	1	1	1	0.833333	0.555556	0.857143	0.833333	0.888889	0.6875	0.666667	0.0298507	0.025974	0.315789	0	0	0.0361446	0.030303
CHHDMR	6828	Bd1-1.CHH	Bd2	42078100	42078299	199	hypo	1	0.5	0.5	0.333333	0	0	0.307692	0	0	0.6	0	NA	NA	0.833333	0	0.21875	0.407895	0.692308	0.384615	0.333333	0.227273
CHHDMR	6838	Bd1-1.CHH	Bd2	42166800	42166999	199	hypo	0.913386	0.311688	0.458824	0.315789	0.5	0.445652	0.414474	0.231884	0.130435	0.131579	0.142857	0.132075	0.0980392	0.131579	0.0368906	0.0567376	0.348039	0	0.153488	0.131868	0.136986
CHHDMR	6875	Bd1-1.CHH	Bd2	42739100	42739299	199	hypo	0.971429	0.978495	0.962121	0.992	0.966184	0.957746	0.98366	0.724138	0.777778	0.866667	0.822581	0.627049	0.859155	0.643564	0.0322196	0.0567164	0.266187	0.0687831	0.0601002	0.108844	0.110218
CHHDMR	6887	Bd1-1.CHH	Bd2	42958500	42958699	199	hypo	0.0194175	0.0431267	0.273885	0.183844	0.110132	0.0519481	0.0212766	0.0104895	0.00722022	0.175	0.163934	0.0394089	0	0.00784314	0.014881	0.00731261	0.261398	0.353448	0.0724299	0	0.00204082
CHHDMR	6899	Bd1-1.CHH	Bd2	43112900	43113199	299	hypo	1	0.253968	0.565217	1	0.393443	0.555556	0.525424	0.566265	0.270588	0.644068	0	0.369048	0.328947	0.409639	0.0278746	0.239617	0.331731	0	0.365854	0.308943	0.26506
CHHDMR	6911	Bd1-1.CHH	Bd2	43261800	43261999	199	hypo	1	0	NA	NA	NA	NA	1	0.727273	0	1	NA	NA	NA	1	0.0248756	0	0.222222	0	0	0	0.037037
CHHDMR	6923	Bd1-1.CHH	Bd2	43429600	43429799	199	hypo	0.6	0.441176	1	0.363636	0.166667	0.3125	0.6	0.0322581	0.028169	0.125	0.0689655	0.105263	0.0377358	0.204545	0.0114943	0.0792079	0.285714	0.0839161	0	0.00840336	0.0813953
CHHDMR	6926	Bd1-1.CHH	Bd2	43454300	43454499	199	hyper	0.875	1	1	1	0.857143	1	1	0.842105	0.592593	0.631579	0.268293	0.558824	0.666667	0.5	0.252525	0.0305344	0	0	0.0982143	0	0.156977
CHHDMR	6964	Bd1-1.CHH	Bd2	44106200	44106399	199	hypo	0.814815	0.844444	0.866667	1	0.9	0.886076	0.972222	0.315789	0.740741	0.5	0.666667	0.5	0.588235	0.552632	0.00909091	0.225352	0.28	0	0.045977	0.0559441	0.120968
CHHDMR	6986	Bd1-1.CHH	Bd2	44456100	44456299	199	hypo	0.714286	0.666667	0.75	NA	1	1	1	NA	0	0	1	0	0	NA	0.0179641	0	0.413793	0.238095	0.230769	0.0307692	0.139535
CHHDMR	6988	Bd1-1.CHH	Bd2	44471600	44471799	199	hypo	0.923077	0.416667	0.875	1	1	0.95	0.85	0	0	0.2	0	0.0625	0	0.147059	0	0.111111	0.238095	0	0.227848	0.191489	0.152542
CHHDMR	7021	Bd1-1.CHH	Bd2	44851300	44851499	199	hypo	1	0.916667	0.833333	1	0.875	0.625	0.75	0.142857	0	0	1	0	0.25	0	0.0247525	0.146825	0.25	0.289855	0.0153846	0.184615	0.0487805
CHHDMR	7040	Bd1-1.CHH	Bd2	45025100	45025299	199	hypo	0.944444	0.924528	1	NA	0.862069	1	1	0.416667	0.5625	0.666667	NA	1	0.727273	0.5	0.0277778	0.05	0.211538	0.384615	0.0465116	0.188679	0.272727
CHHDMR	7043	Bd1-1.CHH	Bd2	45092200	45092399	199	hyper	0.910781	0.976	0.944134	0.981982	0.970833	0.965567	0.968577	0.428571	0.515789	0.526316	0.5	0.589286	0.573034	0.526627	0.252525	0.00625	0	0.0212766	0.0163934	0.0194175	0.03663
CHHDMR	7089	Bd1-1.CHH	Bd2	45817900	45818099	199	hypo	0.294118	0.4	0.625	0.509804	0.447619	0.531915	0.298246	0	0	0.125	0	0.015873	0.275862	0	0.010989	0.0238095	0.823529	0	0	0.567568	0.214286
CHHDMR	7102	Bd1-1.CHH	Bd2	45945400	45945599	199	hyper	0.955224	0.964602	0.901235	0.954545	0.992806	0.995	0.982906	0.761905	0.636364	0.636364	0.6875	0.634409	0.581081	0.658537	0.504	0.0162602	0.0114943	0.047619	0	0.0730769	0.146617
CHHDMR	7119	Bd1-1.CHH	Bd2	46193200	46193499	299	hypo	1	0.977143	1	1	1	1	0.992248	0	0.672727	0.5	0	1	0.62069	0.631579	0.00628931	0.105067	0.222028	0.325714	0.177932	0.192744	0.185714
CHHDMR	7160	Bd1-1.CHH	Bd2	46813400	46813599	199	hypo	1	1	1	1	1	1	1	0.795455	0.901408	0.974359	0.94429	0.945946	0.945946	0.886792	0.0254237	0.0490196	0.266055	0.159851	0.164835	0.163265	0.0915493
CHHDMR	7208	Bd1-1.CHH	Bd2	47385300	47385499	199	hyper	1	1	1	NA	1	NA	1	1	0	0.5	NA	1	NA	0.666667	0.358491	0.454545	0	1	0.7	0.111111	0.0357143
CHHDMR	7223	Bd1-1.CHH	Bd2	47726400	47726599	199	hypo	1	NA	1	1	NA	1	1	0.826087	1	1	1	0.666667	0.833333	1	0.0126582	0.0444444	0.430556	0.424658	0.526316	0.0769231	0.131579
CHHDMR	7224	Bd1-1.CHH	Bd2	47749400	47749599	199	hypo	0.4	0.294118	0.842105	0.811321	0	0.75	0.471698	0.372093	0.363636	0.757576	0.855072	0	0.535714	0.404255	0.0416667	0.25641	0.591549	0.411458	0.0714286	0.467742	0.109215
CHHDMR	7233	Bd1-1.CHH	Bd2	47915200	47915399	199	hypo	0.0508475	NA	0.851852	0.5	0.52381	0.541176	0.754386	0	0	0.3	0	0.35	0.236111	0.354167	0	0	0.270492	0	0.225	0.234216	0.20303
CHHDMR	7255	Bd1-1.CHH	Bd2	48351100	48351299	199	hypo	0.804348	0.621212	0.857143	1	0.842105	0.923077	0.888889	0.290909	0.239437	0.380952	1	0.6	0.833333	0.727273	0.025974	0.0972222	0.342857	0.0526316	0.105263	0.075	0.0833333
CHHDMR	7264	Bd1-1.CHH	Bd2	48552600	48552799	199	hypo	1	0.956522	1	0.961538	0.906977	0.888889	0.9	0.891304	0.867925	0.785714	1	0.956522	0.971429	0.846154	0.0112994	0.273973	0.5	0.223529	0.197531	0.294444	0.0898204
CHHDMR	7310	Bd1-1.CHH	Bd2	49147300	49147499	199	hypo	0.810811	0.910448	1	1	0.818182	0.672131	0.964912	0.5	0.544304	0.354839	0.5	0.627907	0.552632	0.691176	0.037037	0.0662021	0.29661	0	0.0402685	0.265018	0.114679
CHHDMR	7315	Bd1-1.CHH	Bd2	49225600	49225799	199	hyper	0.972603	0.979675	0.958678	0.973039	0.955556	0.977099	0.983165	0.703911	0.604762	0.666667	0.670213	0.66	0.607595	0.554404	0.288462	0.0454545	0.0172414	0.0588235	0.064	0.079602	0.166895
CHHDMR	7348	Bd1-1.CHH	Bd2	49858900	49859099	199	hypo	0.833333	1	1	NA	1	1	1	0.705882	1	0.75	NA	1	NA	1	0.00645161	0.0512821	0.357143	NA	0.145161	0.148148	0.0571429
CHHDMR	7373	Bd1-1.CHH	Bd2	50236300	50236499	199	hypo	0.920792	0.985861	0.988889	0.984783	0.979564	0.971645	0.985447	0.825137	0.791429	0.771739	0.838384	0.890855	0.742222	0.740991	0.0316206	0.0153453	0.457516	0.0347222	0.00724638	0.004329	0.26138
CHHDMR	7387	Bd1-1.CHH	Bd2	50441900	50442099	199	hypo	0.47619	0.5625	0.789474	0.837838	1	0.787879	0.807692	0.0933333	0.039604	0.612903	0.784483	0.814433	0.658228	0.321678	0.0169133	0.0350195	0.241294	0.264368	0.173375	0.287905	0.116883
CHHDMR	7407	Bd1-1.CHH	Bd2	50944900	50945099	199	hypo	1	1	0.666667	1	1	1	1	NA	0.5	0.5	0.333333	NA	0.5	0.5	0.0277778	0.189024	0.284211	0.46988	0.179775	0.206897	0.166667
CHHDMR	7414	Bd1-1.CHH	Bd2	51034000	51034199	199	hypo	0.945736	0.951456	0.979592	1	1	1	0.974138	0.516667	0.230769	0.416667	0.2	0.341463	0.310345	0.333333	0.015625	0.0617978	0.214286	0.0227273	0.0180723	0.0342205	0.0269231
CHHDMR	7443	Bd1-1.CHH	Bd2	51699700	51699899	199	hypo	0.645161	0.863636	0.775	1	0.863636	0.752381	0.915254	0.363636	0.568807	0.530303	0.651163	0.597015	0.65493	0.646617	0.015674	0.0962343	0.283843	0.333333	0.0859375	0.22619	0.142105
CHHDMR	7446	Bd1-1.CHH	Bd2	51774500	51774699	199	hypo	0.875	1	0.857143	NA	NA	1	0.75	0.777778	0.888889	0.666667	NA	NA	0.666667	0.666667	0	0.0416667	0.28	NA	NA	0	0
CHHDMR	7471	Bd1-1.CHH	Bd2	52160200	52160399	199	hyper	0.75	1	1	1	0.970588	1	1	0.777778	0.686747	0.363636	1	0.229167	0.727273	0.651163	0.261905	0.00905563	0	0.0319635	0.0107034	0.0136986	0.00819672
CHHDMR	7476	Bd1-1.CHH	Bd2	52263000	52263199	199	hypo	0.68	0.814815	0.8	0.75	1	0.416667	0.473684	0	0.15	0	0	0	0	0.25	0.00757576	0.192982	0.433333	0.5	0.257812	0.25	0.241758
CHHDMR	7478	Bd1-1.CHH	Bd2	52286600	52286799	199	hypo	0.434783	1	0.904762	0.777778	0.75	0.681818	0.7	0.28	0.214286	0.125	0	0.666667	0.304348	0.173913	0.00377358	0.0144928	0.266055	0.0847458	0.265823	0.0325203	0.0186916
CHHDMR	7487	Bd1-1.CHH	Bd2	52536800	52536999	199	hypo	0.898305	0.827586	0.931034	1	0.764706	0.875	0.982143	0.690909	0.586957	0.703704	1	1	0.966667	0.539683	0.0240385	0.08	0.271186	0.160714	0.126984	0.240506	0.0986842
CHHDMR	7512	Bd1-1.CHH	Bd2	53009800	53009999	199	hyper	0.820513	0.944444	1	1	1	1	0.964286	0.3	0	0	NA	0	NA	0.5	0.345238	0.124183	0	0	0	0.25	0.238095
CHHDMR	7548	Bd1-1.CHH	Bd2	53724500	53724699	199	hypo	0.854167	0.7	0.333333	NA	NA	0.727273	1	0.2	0	0	0	NA	0.142857	1	0.0252101	0	0.423077	0	NA	0	0.0625
CHHDMR	7553	Bd1-1.CHH	Bd2	53815900	53816299	399	hypo	0	0.0147059	0.840336	NA	0	0.285714	0	0.0172414	0.0238095	0.58209	0.25	0	0.0921053	0	0.004	0	0.289256	0	0	0.019685	0
CHHDMR	7554	Bd1-1.CHH	Bd2	53822100	53822299	199	hypo	0	0	0.666667	0	0	0	0.111111	0.0192308	0.037037	0.666667	0	0	0	0.125	0.015625	0	0.343949	0.010101	0.0129032	0	0
CHHDMR	7567	Bd1-1.CHH	Bd2	54199300	54199499	199	hypo	0.950943	0.960227	0.942308	0.953488	0.968421	0.956522	0.910448	0.547619	0.22807	0.266667	0.666667	0.52	0.472222	0.447368	0.0458554	0.149718	0.270492	0.126582	0.0716724	0.138756	0.132296
CHHDMR	7571	Bd1-1.CHH	Bd2	54337900	54338099	199	hypo	0.833333	0.75	0.777778	NA	0.857143	0.5	0.954545	0.225	0.611111	0.909091	NA	0.333333	0.5	0.8125	0	0.0297619	0.261364	NA	0.0444444	0.333333	0.0806452
CHHDMR	7574	Bd1-1.CHH	Bd2	54347900	54348099	199	hypo	0.938776	1	1	1	1	1	1	0.870968	1	1	1	1	1	0.8	0.0278552	0.0543478	0.213115	0	0	0	0.0757576
CHHDMR	7614	Bd1-1.CHH	Bd2	55408400	55408599	199	hypo	0.384615	0.583333	0.619048	0.5	NA	0.4	0.666667	0.0204082	0.0454545	0.142857	0	0	0	0.0869565	0.0222222	0.193182	0.296053	0.0833333	0.0227273	0.0652174	0.240196
CHHDMR	7617	Bd1-1.CHH	Bd2	55544700	55544899	199	hypo	0.787879	0.685714	0.842105	1	0.555556	0.714286	1	0.125	0.8	1	1	1	0.888889	1	0.00840336	0.183099	0.36	0.0714286	0.0212766	0.133333	0.105263
CHHDMR	7667	Bd1-1.CHH	Bd2	56637600	56637799	199	hypo	0.9	0.913043	1	1	0.943396	0.883721	0.98	0.333333	0.117647	0.666667	0.181818	0.0625	0.1875	0.210526	0.0204082	0.128655	0.311475	0.144	0.282759	0.231405	0.303867
CHHDMR	7669	Bd1-1.CHH	Bd2	56719900	56720099	199	hypo	0	0	0	0	0	0.333333	0	0	0	NA	0	0	0	0	0.0245902	0.0291971	0.280303	0.121951	0.285714	0.470588	0.293194
CHHDMR	7701	Bd1-1.CHH	Bd2	57306000	57306199	199	hypo	1	1	NA	NA	NA	NA	0	0.111111	0.5	0.571429	NA	1	NA	0.5	0.0353982	0.382514	0.347826	NA	0	0	0.0634921
CHHDMR	7725	Bd1-1.CHH	Bd2	57672500	57672699	199	hypo	0.031746	0.909091	0.972222	1	1	0.931507	0.767442	0.015625	0.375	0.837209	0.2	0.0714286	0.555556	0.4375	0.0136986	0.0769231	0.253333	0.111111	0.0810811	0.120805	0.0701754
CHHDMR	7780	Bd1-1.CHH	Bd2	58888300	58888499	199	hyper	0.956332	0.852657	0.959677	0.985294	0.909502	0.943038	0.950739	0.572327	0.481651	0.747748	0.834586	0.677273	0.882812	0.641791	0.338095	0.27163	0.037594	0.118993	0.316	0.0932203	0.073955
CHHDMR	7798	Bd1-1.CHH	Bd2	59328600	59328799	199	hyper	NA	NA	NA	NA	NA	NA	NA	NA	NA	NA	NA	NA	NA	NA	1	NA	0.0151515	NA	0	NA	NA
CHHDMR	7806	Bd1-1.CHH	Bd3	236900	237099	199	hypo	0	0	0.95	NA	NA	0	0	0	0	0.727273	NA	NA	0	0	0.0125	0	0.352941	0	NA	0	0
CHHDMR	7808	Bd1-1.CHH	Bd3	267400	267599	199	hypo	0.904762	NA	0.794118	1	NA	1	0.989691	0.71831	NA	0.604651	NA	NA	0.45	0.754902	0.0338983	NA	0.442953	0	NA	0.111111	0.0594966
CHHDMR	7861	Bd1-1.CHH	Bd3	1621500	1621799	299	hyper	0.827957	0.977273	0.933333	0.913043	1	0.952381	0.974359	0	0.571429	0.875	1	1	0.6	0.75	0.289189	0	0.00714286	0.030303	0.00925926	0.0705394	0.0341463
CHHDMR	7868	Bd1-1.CHH	Bd3	1756000	1756199	199	hypo	0.675676	0.827273	0.959184	0.888889	0.87234	0.838384	0.883978	0.4	0.733333	0.814815	0.428571	0.705882	0.9	0.709302	0.00660066	0.190972	0.304	0.405405	0.314433	0.172662	0.181425
CHHDMR	7922	Bd1-1.CHH	Bd3	2798100	2798399	299	hypo	0	0.02	0.672131	NA	0.777778	0.957746	0.776786	0	0	0.410714	NA	0.696429	0.715517	0.628866	0.00689655	0	0.51	NA	0.288	0.554286	0.308943
CHHDMR	7956	Bd1-1.CHH	Bd3	3237700	3237899	199	hypo	0	0.684211	0.714286	NA	0.263158	0.769231	0.785714	0	0.25	0.333333	NA	0.2	0	0.444444	0	0.0493827	0.434783	NA	0.0350877	0	0
CHHDMR	7988	Bd1-1.CHH	Bd3	4023400	4023599	199	hypo	0.5	1	1	1	1	0.6	1	0	0.444444	0.833333	0.285714	0.6	1	0.4	0	0.258929	0.617647	0.598361	0.462687	0.611111	0.2
CHHDMR	7999	Bd1-1.CHH	Bd3	4323200	4323399	199	hypo	0.95	1	1	NA	1	1	0.833333	0.444444	0.777778	0.666667	NA	0.625	0.4	0.8	0.00512821	0.060241	0.3	NA	0.09	0.0566038	0.232558
CHHDMR	8019	Bd1-1.CHH	Bd3	4625900	4626099	199	hypo	0.496552	0.019802	0.790323	0	0.542056	0.0178571	0	0.180851	0	0.386667	0	0.204724	0	0	0.00201207	0.00319489	0.21365	0.025641	0.150206	0	0.0107527
CHHDMR	8042	Bd1-1.CHH	Bd3	5007300	5007499	199	hyper	0.777778	0.722222	0.823529	1	0.6	0.833333	0.7	NA	0	0	NA	0	0	0	0.37931	0.075	0	0	0.263158	0.323944	0
CHHDMR	8050	Bd1-1.CHH	Bd3	5112400	5112599	199	hypo	1	0.42623	0.56	1	0	0.326531	0.297619	0.652174	0.440476	0.57971	0.842105	0.4	0.272727	0.211111	0.0142349	0.321856	0.325056	0.0216867	0.0418118	0.246032	0.144291
CHHDMR	8052	Bd1-1.CHH	Bd3	5138600	5138799	199	hypo	0.846847	0.732283	0.690476	1	0.946237	0.678082	0.781991	0.346154	0.230216	0.340909	0.6	0.315789	0.18	0.225806	0.0187266	0.0815047	0.256881	0.130435	0.0865385	0.0872093	0.0764818
CHHDMR	8053	Bd1-1.CHH	Bd3	5139500	5139699	199	hypo	NA	1	1	0	1	NA	1	0.2	NA	0	0	NA	NA	0	0.0208333	0.333333	0.346154	0	0	0	0
CHHDMR	8094	Bd1-1.CHH	Bd3	5717800	5717999	199	hypo	0.734694	0.819048	0.823529	0.896552	0.898734	0.84	0.794118	0.2	0.310811	0.458333	0.269231	0.472727	0.5	0.3125	0.00606061	0.0853659	0.284722	0.232704	0.159375	0.241525	0.10929
CHHDMR	8110	Bd1-1.CHH	Bd3	6118500	6118699	199	hyper	0.87963	0.981333	0.978495	0.941176	0.965333	0.990536	0.756385	0.463235	0.750853	0.69375	0.664516	0.740351	0.700461	0.523277	0.374194	0.0273723	0.013913	0.0171958	0.0612557	0.061287	0.30835
CHHDMR	8111	Bd1-1.CHH	Bd3	6135900	6136099	199	hyper	0.980392	0.9625	0.961538	1	0.962264	0.87234	0.904762	0.64	0.694444	0.416667	0.5	0.633333	0.619048	0.424242	0.450479	0.019337	0.030837	0.047619	0.0164384	0.0416667	0.011976
CHHDMR	8129	Bd1-1.CHH	Bd3	6553800	6553999	199	hypo	NA	NA	NA	NA	NA	NA	NA	0.707071	0	0.846154	NA	0.925926	0.792453	0.810127	0.0173611	0.0227273	0.362319	NA	0.255814	0.19469	0.11811
CHHDMR	8134	Bd1-1.CHH	Bd3	6628100	6628299	199	hyper	0.973333	0.948598	0.991304	0.961644	0.979532	0.977887	0.964876	0.621891	0.65019	0.696078	0.701005	0.66895	0.662295	0.699801	0.928571	0.0169492	0	NA	0.0285714	0.688889	0.137795
CHHDMR	8136	Bd1-1.CHH	Bd3	6693000	6693199	199	hypo	1	0.932432	1	1	1	0.964126	0.963964	0.142857	0.230769	0.272727	1	0.142857	0.194444	0.357143	0.0105263	0.0597015	0.255814	0	0.0105263	0	0
CHHDMR	8150	Bd1-1.CHH	Bd3	6902400	6902599	199	hypo	0.555556	0.857143	0.833333	0.533333	1	0.823529	0.964912	0	0.5	1	0.25	1	0.933333	0.846154	0.0232558	0.557971	0.555556	0.210526	0.166667	0.382353	0.0384615
CHHDMR	8155	Bd1-1.CHH	Bd3	7024500	7024699	199	hypo	0.666667	0.7	0.659574	0.888889	0.947368	0.636364	0.90411	0.0882353	0.247312	0.426966	0.314286	0.51773	0.555556	0.421384	0.0232558	0.25	0.267327	0.22069	0.298893	0.219251	0.191126
CHHDMR	8163	Bd1-1.CHH	Bd3	7154800	7154999	199	hypo	0.736842	0.25	1	1	1	0.6	0.846154	NA	NA	NA	NA	NA	NA	NA	0.028777	0	0.289474	0.5	0.210526	0.142857	0.178947
CHHDMR	8165	Bd1-1.CHH	Bd3	7183400	7183599	199	hypo	1	0.928571	1	1	1	1	1	1	NA	0.666667	NA	NA	NA	0	0.0210526	0.0865385	0.35567	0.214286	0.390244	0.260504	0.159091
CHHDMR	8167	Bd1-1.CHH	Bd3	7195200	7195399	199	hypo	0.555556	0.72	0.684211	0.666667	0.962264	1	0.984127	NA	NA	NA	NA	NA	NA	NA	0.00943396	0.261803	0.316384	0.228571	0.438272	0.205451	0.333895
CHHDMR	8209	Bd1-1.CHH	Bd3	7760900	7761099	199	hypo	0.292683	0.259259	0.4	0.307692	0.0540541	0.287879	0.333333	0.1875	0.176471	0.5	0.222222	0.047619	0.0833333	0	0.025641	0.107143	0.363636	0.2	0.3	0.128571	0.146341
CHHDMR	8214	Bd1-1.CHH	Bd3	7793200	7793399	199	hypo	0.0722892	0.0128205	0.724638	0.0555556	0.0289855	0.0882353	0.0526316	0.0384615	0	0.340426	0	0	0	0	0	0.00722022	0.21978	0	0	0	0
CHHDMR	8235	Bd1-1.CHH	Bd3	8048400	8048599	199	hypo	1	NA	0.947368	0.555556	0.913043	NA	NA	0	NA	0.5	NA	NA	NA	NA	0	NA	0.355263	0.375	0.492308	NA	NA
CHHDMR	8249	Bd1-1.CHH	Bd3	8257900	8258099	199	hypo	0.857143	0.972603	0.225806	0.0169492	0.0277778	0.0802469	0.043956	0.555556	0.556818	0.194444	0.0545455	0.113821	0.0463576	0.0564103	0	0	0.586207	0.102564	0.144509	0.157407	0.119691
CHHDMR	8258	Bd1-1.CHH	Bd3	8379400	8379599	199	hyper	1	1	0.970588	0.990698	0.974138	0.942857	0.991304	0.4	0.8	0.691589	0.744493	0.723881	0.698864	0.76378	0.333333	0.05	0.03	0.0121739	0.0312036	0.0116009	0.0164319
CHHDMR	8265	Bd1-1.CHH	Bd3	8522900	8523099	199	hypo	0.962791	0.902475	0.987775	0.990635	0.985793	0.907738	0.965342	0.511278	0.690987	0.666667	0.752044	0.752315	0.574144	0.717895	0.00784314	0.0111732	0.427711	0.0243902	0.132013	0.0930851	0.362963
CHHDMR	8273	Bd1-1.CHH	Bd3	8603500	8603699	199	hypo	0.984127	0.546875	0.4	0.73913	0.6875	0.390625	0.570093	0.92	0.888889	1	1	0.875	0.965517	0.974359	0.0377358	0.404389	0.601504	0.424242	0.428571	0.25	0.358696
CHHDMR	8295	Bd1-1.CHH	Bd3	8875700	8875899	199	hyper	0.947368	0.971751	0.962963	0.949367	0.907692	0.978723	0.923077	0.55814	0.525	0.525	0.466667	0.0909091	0.72973	0.55	0.390244	0	0.0285714	0.0363636	0	0	0.047619
CHHDMR	8309	Bd1-1.CHH	Bd3	9067400	9067599	199	hypo	0.941176	0.914286	0.932331	0.928571	0.969027	0.942105	0.923387	0.71831	0.787879	0.88	0.869565	0.701493	0.809524	0.795918	0.0463918	0.100386	0.277045	0.230769	0.254186	0.213058	0.175299
CHHDMR	8332	Bd1-1.CHH	Bd3	9443600	9443799	199	hypo	NA	NA	NA	NA	NA	NA	NA	NA	0.8125	1	1	1	1	0.818182	0.043771	0.334004	0.27791	0.510769	0.455752	0.380952	0.368687
CHHDMR	8335	Bd1-1.CHH	Bd3	9536100	9536299	199	hypo	NA	NA	NA	NA	NA	NA	NA	1	0.9	0.875	1	1	0.727273	0.777778	0	0.0473684	0.350649	0.0512821	0.238994	0.1	0.234286
CHHDMR	8359	Bd1-1.CHH	Bd3	9919600	9919799	199	hyper	0.914141	0.991045	0.963855	0.896552	0.947368	0.972376	0.994118	0.618182	0.516667	0.411765	0.571429	0.611111	0.779661	0.75	0.61859	0.257009	0	0	0	0.253275	0.368421
CHHDMR	8376	Bd1-1.CHH	Bd3	10141900	10142099	199	hyper	0.98895	0.993485	0.98366	0.983562	0.972519	0.994595	0.988996	0.770115	0.88189	0.955357	0.928339	0.962185	0.768182	0.904762	0.33815	0.00571429	0.00617284	0	0.0153257	0.0968661	0.125858
CHHDMR	8412	Bd1-1.CHH	Bd3	10969500	10969699	199	hyper	0.929204	0.9675	0.983333	0.977049	0.97695	0.980237	0.981395	0.09375	0.608696	0.539683	0.46875	0.636364	0.481203	0.529412	0.402062	0.119186	0	0.00456621	0.00581395	0.349776	0.570388
CHHDMR	8421	Bd1-1.CHH	Bd3	11105700	11105899	199	hyper	0.990228	0.975904	0.961207	0.990548	0.969555	0.961694	0.970383	0.90625	0.748092	0.647059	0.770186	0.696429	0.625616	0.80597	0.52551	0.0113821	0.00921659	0.00314465	0.00518135	0.00227273	0.109181
CHHDMR	8428	Bd1-1.CHH	Bd3	11184800	11184999	199	hypo	0.916667	1	1	1	1	0.909091	0.962963	0.653846	0.666667	1	0.611111	0.731707	0.470588	0.965517	0.0125	0.234266	0.40566	0.34359	0.0851852	0.183333	0.0886525
CHHDMR	8462	Bd1-1.CHH	Bd3	12068800	12068999	199	hypo	0.177778	0.480519	0.650794	0.526316	0.477477	0.584615	0.511811	0	0.0736842	0.0882353	0.03125	0.060241	0.08	0.0552764	0.0144928	0.291188	0.298387	0.257143	0.190698	0.576923	0.338308
CHHDMR	8497	Bd1-1.CHH	Bd3	12503300	12503499	199	hypo	0.93617	0.973451	1	1	1	0.974359	0.936508	0.726027	0.621212	0.6	NA	0.767442	0.65	0.676471	0.00873362	0.0401146	0.283019	0	0.0282258	0.00970874	0.075
CHHDMR	8510	Bd1-1.CHH	Bd3	12736000	12736299	299	hypo	0.307692	1	0.542857	0.636364	0.851064	0.342857	0.340426	0.0909091	NA	0	0	0	0.25	0.666667	0.00826446	0.169811	0.30719	0.303448	0.425532	0.173228	0.228464
CHHDMR	8574	Bd1-1.CHH	Bd3	13846600	13846799	199	hypo	1	0.666667	1	1	0.909091	1	1	0.473684	0.714286	0.842105	0.818182	0.666667	0.455696	0.735849	0.0305344	0.0909091	0.64	0	0.0322581	0.112426	0.0196078
CHHDMR	8618	Bd1-1.CHH	Bd3	14564300	14564499	199	hypo	0.963636	0.964602	1	0.95	1	0.977011	0.949367	0.705882	0.419355	0.642857	0.823529	0.75	0.458333	0.5	0.00917431	0.0277778	0.229167	0.134615	0.0869565	0.0243902	0.0833333
CHHDMR	8619	Bd1-1.CHH	Bd3	14564800	14564999	199	hypo	0.923077	0.923077	1	NA	1	0.75	1	0.25	0.555556	0.5	NA	0.666667	0.8	1	0.0153846	0.0364964	0.492537	0	0.216216	0.111111	0.386364
CHHDMR	8640	Bd1-1.CHH	Bd3	14902400	14902599	199	hypo	1	0.875	1	1	1	1	1	0.882353	0.8	0.9	1	0.875	1	1	0.00555556	0.0185185	0.254237	0.408451	0	0	0.0617284
CHHDMR	8665	Bd1-1.CHH	Bd3	15405000	15405199	199	hypo	1	1	1	1	1	1	1	NA	0.666667	0.666667	NA	NA	1	NA	0	0.27451	0.338462	0	0.368421	0.435897	0.402299
CHHDMR	8666	Bd1-1.CHH	Bd3	15405800	15405999	199	hypo	0.7	0.8	0.923077	NA	1	1	0.444444	0.037037	0.111111	0	NA	0	0	0.0909091	0.00833333	0	0.211268	0.846154	0.197183	0.15625	0.138298
CHHDMR	8671	Bd1-1.CHH	Bd3	15463000	15463199	199	hypo	1	0.905263	1	0.974138	0.955056	0.928571	0.984615	0.765957	0.743243	0.904762	0.86	0.805195	0.75	0.798611	0.0121951	0.110266	0.298246	0.186869	0.120253	0.300699	0.216028
CHHDMR	8673	Bd1-1.CHH	Bd3	15469500	15469699	199	hypo	0.904762	0.957746	0.894737	1	1	0.947368	0.967742	0.45	0.380952	0.222222	0	0.5	0.6875	0.625	0.00917431	0.0178571	0.275862	0	0.0519481	0	0.0275229
CHHDMR	8735	Bd1-1.CHH	Bd3	16332400	16332599	199	hypo	0.921875	0.95122	1	1	1	0.945455	0.96	0	0.0416667	0	1	0.0769231	0.0714286	0	0.00877193	0.0301205	0.234043	0	0	0.0075188	0.0186047
CHHDMR	8745	Bd1-1.CHH	Bd3	16494300	16494499	199	hypo	0.95082	0.971429	0.969697	1	NA	0.75	1	0.37037	0.46875	0.648649	NA	NA	0.5	0.2	0.0245098	0.110687	0.247191	0.666667	NA	0.2	0.125
CHHDMR	8774	Bd1-1.CHH	Bd3	16912300	16912499	199	hypo	0.831325	0.978648	0.980198	0.973621	0.967742	0.985893	0.96934	0.414634	0.840206	0.820513	0.916667	0.881857	0.834951	0.855513	0.016129	0.0103093	0.53202	0.00877193	0.0155039	0.02	0.328358
CHHDMR	8793	Bd1-1.CHH	Bd3	17146700	17146899	199	hypo	0.590909	0.727273	0.695652	0.818182	0.772727	0.547619	0.698413	0.115385	0.5	0.541667	0.4	0.37037	0.508197	0.539474	0.0144928	0.176471	0.269841	0.275	0.414141	0.370558	0.235915
CHHDMR	8823	Bd1-1.CHH	Bd3	17584600	17584799	199	hypo	0	0.0227273	0.191489	0	0.0526316	0	0	0	0.0166667	0.294118	0.0333333	0.0740741	0.0638298	0.0697674	0	0.00421941	0.273128	0	0	0	0.027972
CHHDMR	8834	Bd1-1.CHH	Bd3	17807300	17807599	299	hypo	0.857143	1	1	NA	1	NA	0.5	0	0.333333	0	NA	NA	NA	0	0.0119048	0.305758	0.37069	0.100671	0.236111	0.39726	0.27321
CHHDMR	8855	Bd1-1.CHH	Bd3	18214400	18214699	299	hypo	1	0.946429	0.928571	0.95122	1	1	0.988372	0.857143	0.811321	0.885714	0.857143	0.906977	0.82	0.902778	0.0299625	0.165493	0.287197	0.088	0.251142	0.107143	0.113281
CHHDMR	8860	Bd1-1.CHH	Bd3	18270500	18270699	199	hypo	0.987013	0.898305	0.969697	1	1	0.953488	1	0.666667	0.626667	0.5	0.882353	0.568627	0.72549	0.774194	0.0171569	0.0906977	0.261084	0.0769231	0.104478	0.0058309	0.0620155
CHHDMR	8869	Bd1-1.CHH	Bd3	18374700	18374899	199	hypo	0.6	0.933333	1	NA	NA	NA	NA	0.25	0.824561	0.8	NA	NA	NA	NA	0	0.489209	0.597015	NA	NA	NA	NA
CHHDMR	8885	Bd1-1.CHH	Bd3	18714300	18714499	199	hyper	0.775	1	1	1	1	1	0.761194	0.56338	1	0.857143	1	0.514286	1	0.470588	0.350962	0.2	0	0.444444	0	0.166667	0.392857
CHHDMR	8916	Bd1-1.CHH	Bd3	19202500	19202699	199	hypo	0.976744	0.983607	0.980488	0.985743	0.965517	0.981873	0.965438	0.712446	0.725	0.847682	0.743191	0.555556	0.80531	0.766467	0.027668	0.131148	0.201681	0.0178571	0.0454545	0.106195	0.0538462
CHHDMR	8919	Bd1-1.CHH	Bd3	19216400	19216599	199	hypo	0.0322581	0.010989	0	0	0.0143885	0.0136986	0	0.00961538	0.0103093	0.08	0	0	0.0285714	0.0185185	0.0135135	0	0.378378	0	0	0.0352941	0
CHHDMR	8936	Bd1-1.CHH	Bd3	19604200	19604399	199	hyper	0.919118	0.951613	1	0.836066	0.960526	1	0.954023	0.525	0.533333	0.304348	0.1875	0.5625	0.545455	0.428571	0.283077	0.0337838	0.0117647	0.458564	0.142857	0.059322	0.0108696
CHHDMR	8976	Bd1-1.CHH	Bd3	20147900	20148099	199	hypo	0.857143	0.902439	0.857143	1	1	1	0.892857	1	0.962963	1	1	1	0.9375	0.933333	0.0227273	0.127148	0.312821	0	0.404762	0.0520833	0.243902
CHHDMR	8993	Bd1-1.CHH	Bd3	20372300	20372499	199	hypo	0.888889	0.8	1	0.555556	0.76	0.661017	0.711111	0	0.09375	0.0833333	0	0	0.144578	0.157143	0.00904977	0.0597826	0.284091	0.129032	0.043956	0.125	0.0746269
CHHDMR	9025	Bd1-1.CHH	Bd3	20827100	20827299	199	hypo	0.733333	0.866667	0.9375	NA	0	NA	NA	0.375	0.666667	0.8	0.5	1	1	0.333333	0.00952381	0.0875	0.305085	0.2	0.363636	0.175	0.171429
CHHDMR	9073	Bd1-1.CHH	Bd3	21795700	21795899	199	hypo	0.96732	0.578035	0.443038	0.958333	0.522388	0.96	0.984694	0.875	0.426667	0.421053	0.761905	0.4	0.708333	0.827586	0.0225806	0.376789	0.411003	0.0199005	0.3213	0.01443	0.0074813
CHHDMR	9103	Bd1-1.CHH	Bd3	22247600	22247799	199	hypo	0.84	0.971831	0.5	0.666667	1	0.190476	0.592593	0.768293	0.769231	0.5	0.545455	0.923077	0	0.422222	0.0318841	0.0215054	0.375	0.204082	0.102273	0.134328	0.173228
CHHDMR	9110	Bd1-1.CHH	Bd3	22309000	22309199	199	hyper	0.981203	0.945378	0	0	0.949749	0	0.0179641	0.872951	0.541899	0	0.047619	0.448454	0	0	0.419142	0.00364964	0	0	0	0.0149254	0.00729927
CHHDMR	9120	Bd1-1.CHH	Bd3	22604800	22604999	199	hypo	1	0.75	0.75	1	0.5	0.9	1	0.631579	0.461538	0.666667	0.5	0.8	0.6	0.714286	0.0192308	0.115385	0.265625	0	0.0909091	0.0740741	0.025
CHHDMR	9121	Bd1-1.CHH	Bd3	22609700	22609899	199	hypo	0.977011	0.989583	0.965517	0.984615	0.983193	0.959677	0.981481	0.892617	0.805556	0.793651	0.979021	0.92607	0.889381	0.869565	0.0367965	0.0967742	0.29064	0.0653266	0.124457	0.138042	0.0241546
CHHDMR	9152	Bd1-1.CHH	Bd3	23180100	23180299	199	hypo	0.956386	0.973958	0.980769	0.958549	0.980978	0.973684	0.986945	0.8	0.865385	0.890411	0.916084	0.868132	0.850187	0.901961	0.00705882	0.148541	0.34375	0	0.00334448	0	0.0027248
CHHDMR	9165	Bd1-1.CHH	Bd3	23563000	23563199	199	hypo	0.446281	0.238095	0.714286	NA	NA	0.538462	1	0.12766	0.2	0.7	NA	NA	0.222222	NA	0.00904977	0.114286	0.241379	NA	NA	0	0.333333
CHHDMR	9186	Bd1-1.CHH	Bd3	24358700	24358899	199	hypo	0.888889	1	1	NA	1	NA	1	0.705882	0.607143	0.857143	NA	0.833333	NA	0.75	0	0.0428571	0.225806	NA	0	NA	0.027027
CHHDMR	9254	Bd1-1.CHH	Bd3	25707200	25707399	199	hyper	1	1	1	1	0.958333	0.75	1	0.75	0.771429	0.636364	0.857143	0.931034	0.4	0.916667	0.222222	0.00460829	0	0.115385	0.025641	0.12987	0.00704225
CHHDMR	9265	Bd1-1.CHH	Bd3	25884200	25884399	199	hypo	0.962963	0.947368	0.978723	0.846154	1	0.953271	0.929688	0.714286	0.692308	0.761905	0.666667	0.71875	0.666667	0.557692	0.00884956	0.246154	0.27907	0	0.0833333	0.0649351	0.141304
CHHDMR	9269	Bd1-1.CHH	Bd3	25913600	25913799	199	hypo	0.8125	0.869565	0.888889	0.904762	0.911765	0.9	0.810811	0.1	0.5	NA	NA	0	0	0.333333	0.0243902	0.0743802	0.309524	0.254545	0.202381	0.25	0.08
CHHDMR	9287	Bd1-1.CHH	Bd3	26292600	26292799	199	hypo	0.971014	1	0.916667	0.666667	0.888889	1	1	0.614286	0.428571	0.888889	1	0.5	0.833333	0.727273	0.0110132	0.0639269	0.416667	0.0344828	0	0.0188679	0.0337079
CHHDMR	9294	Bd1-1.CHH	Bd3	26405300	26405499	199	hyper	0.965699	0.921615	0.968	0.947514	0.990476	0.926259	0.953271	0.527273	0.623656	0.68	0.87234	0.586957	0.679688	0.597484	0.285714	0.0296296	0	0.0169492	0	0.0277778	0.173285
CHHDMR	9296	Bd1-1.CHH	Bd3	26410200	26410399	199	hypo	1	1	1	1	1	0.917808	0.967742	0.768421	1	0.833333	0.65	0.923077	0.782609	0.866667	0.0134228	0.025	0.4	0.0227273	0	0.0135135	0.0276923
CHHDMR	9298	Bd1-1.CHH	Bd3	26419500	26419799	299	hypo	0.943662	0.982456	1	0.95	0.952381	0.930233	0.900709	0.298701	0.654545	0.578947	0.725	0.5	0.484375	0.535354	0.011236	0.0189573	0.253521	0.0352113	0.00892857	0.0245902	0.0508906
CHHDMR	9308	Bd1-1.CHH	Bd3	26865100	26865299	199	hypo	0.956522	0.978261	1	0.957055	0.974026	0.982079	0.983333	0.91358	0.745098	0.964286	0.795455	0.897959	0.876543	0.77027	0.0441176	0.0714286	0.226562	0.077381	0.133641	0.0469208	0.048105
CHHDMR	9309	Bd1-1.CHH	Bd3	26875600	26875799	199	hypo	0.971831	0.968254	0.959184	0.967742	0.952381	0.976744	0.924731	0.5	0.62963	0.797297	0.730769	0.696629	0.809524	0.658824	0.015444	0.00657895	0.224852	0	0	0.0171821	0.0132159
CHHDMR	9313	Bd1-1.CHH	Bd3	26985500	26985699	199	hypo	0	0.132075	0	0	0	0	0	0	0.706422	0.539683	0	0.375	0	0	0	0.0582192	0.329268	0.0810811	0.168831	0	0
CHHDMR	9317	Bd1-1.CHH	Bd3	27025400	27025599	199	hypo	1	1	1	1	1	0.833333	1	0.75	1	1	0	1	1	1	0.0340136	0	0.222222	0	0.333333	0.115385	0.025641
CHHDMR	9319	Bd1-1.CHH	Bd3	27124900	27125099	199	hypo	1	0.611111	1	1	1	0.875	1	0.87037	0.789474	1	0.8	0.962963	0.827586	0.966667	0.0337838	0.0396476	0.321429	0.138889	0.160584	0.0618557	0.141243
CHHDMR	9333	Bd1-1.CHH	Bd3	27585100	27585299	199	hyper	0.980392	0.857143	1	0.833333	1	1	1	0.645833	0	0.666667	0.75	0.875	0.5	0.419355	0.261168	0.150943	0.0232558	0	0.175439	0.125	0.14881
CHHDMR	9416	Bd1-1.CHH	Bd3	28863500	28863699	199	hypo	0.962085	0.949153	1	1	0.966292	0.947368	0.937888	0.8	0.738462	0.811321	0.710526	0.766667	0.7173	0.833333	0.0184758	0.221277	0.247748	0.0194175	0.129032	0.177333	0.127869
CHHDMR	9418	Bd1-1.CHH	Bd3	28889200	28889499	299	hypo	1	0.934579	1	0.952381	0.95082	1	0.957447	0.777778	0.875	1	0.833333	0.972222	0.96	0.903226	0.015748	0.193548	0.36	0.0113636	0.381963	0.133676	0.188213
CHHDMR	9421	Bd1-1.CHH	Bd3	28938400	28938599	199	hypo	0.960452	0.944444	0.973913	0.967213	0.9	0.941834	0.980583	0.88	0.819512	0.664975	0.952381	0.81383	0.359712	0.819473	0.010989	0.258555	0.25	0.030303	0.0422535	0.00606061	0.434307
CHHDMR	9435	Bd1-1.CHH	Bd3	29091300	29091499	199	hypo	0.0930233	0.0714286	0.263158	0	0	0.0833333	0	0.030303	0	0.1875	0	0	0	0	0.01	0.0747664	0.654545	0	0	0.2	0.0186916
CHHDMR	9438	Bd1-1.CHH	Bd3	29109300	29109499	199	hypo	0.0212766	0.656627	0.616	0	0.0454545	0.037037	0.735294	0	0.112676	0.201923	0	0.0625	0	0.177632	0	0.413793	0.5	0	0	0	0.402414
CHHDMR	9448	Bd1-1.CHH	Bd3	29282400	29282599	199	hypo	0.846154	0.842105	1	1	1	1	0.913043	0.673469	0.826923	0.868421	0.75	0.6875	0.68	0.780488	0.0347826	0.10628	0.256757	0.0196078	0.109375	0.112676	0.100457
CHHDMR	9469	Bd1-1.CHH	Bd3	29708900	29709099	199	hypo	0.592593	0.413793	0.75	1	0.105263	0.8125	0.522727	0.424242	0.566667	0.25	0.545455	1	0.72	0.765625	0	0.309091	0.269504	0.418605	0.409524	0.157534	0.161473
CHHDMR	9507	Bd1-1.CHH	Bd3	30561300	30561499	199	hyper	0.969466	0.967871	0.946667	0.983607	0.976974	0.970721	0.969188	0.592308	0.566372	0.658537	0.719424	0.714286	0.707763	0.743017	0.295775	0.0344828	0.00884956	0.0126582	0.0123967	0.0146628	0.0449102
CHHDMR	9527	Bd1-1.CHH	Bd3	30937500	30937699	199	hypo	0.985507	0.956522	0.625	0.410256	0.489796	0.482143	0.535354	0.25	0.625	0.272727	0.294118	0.291667	0.12	0.184211	0.00606061	0	0.275862	0.162338	0.112903	0.407216	0.122517
CHHDMR	9550	Bd1-1.CHH	Bd3	31319100	31319499	399	hypo	0.879518	1	0.823529	0.923077	1	0.958333	0.978261	0.743902	0.835821	0.9	1	0.714286	0.806122	0.8	0.0157895	0.05	0.376923	0.0472441	0.132075	0.0430108	0.060241
CHHDMR	9561	Bd1-1.CHH	Bd3	31528900	31529099	199	hypo	0.666667	NA	0.8	NA	0.333333	0.666667	0.571429	0.25	NA	0.25	NA	0.2	0.333333	0.166667	0	NA	0.235294	NA	0	0	0.047619
CHHDMR	9570	Bd1-1.CHH	Bd3	31617000	31617199	199	hyper	0.88	1	1	1	1	1	0.952381	0.571429	0.5	1	NA	0	0	0.625	0.330827	0.38961	0.0254237	0.19403	0	0.059322	0.122807
CHHDMR	9576	Bd1-1.CHH	Bd3	31769300	31769499	199	hyper	0.574879	0.561856	0.981481	0.966667	0.964286	0.973585	0.969419	0.45815	0.559471	0.774194	0.768657	0.733945	0.64881	0.754545	0.424012	0.5804	0.0209524	0.0372272	0.0465929	0.0210728	0.0215727
CHHDMR	9591	Bd1-1.CHH	Bd3	31985300	31985499	199	hyper	0.235294	0.266667	0.5	0	0.666667	0.407407	0.733333	0	0.4	1	NA	1	NA	0.25	0.214286	0	0	0	0.121212	0.0517241	0.0322581
CHHDMR	9609	Bd1-1.CHH	Bd3	32298700	32298899	199	hyper	0.272727	0	0	0.1	0	0.2	0	0.423423	0	0	0.378378	0.0526316	0	0.025641	0.249428	0.015873	0	0.361905	0	0	0.00571429
CHHDMR	9624	Bd1-1.CHH	Bd3	32701200	32701399	199	hyper	0.964286	0.963746	0.990099	0.976471	0.983165	0.965812	0.989011	0.947368	0.816901	0.9125	0.842857	0.969349	0.892857	0.98513	0.314286	0.0167364	0.0182927	0.00561798	0.142857	0.174797	0.147147
CHHDMR	9626	Bd1-1.CHH	Bd3	32750000	32750199	199	hypo	0.909091	0.8125	1	NA	0.857143	0.75	0.833333	0.15	0.277778	0.428571	1	0.5	0.6	0.625	0.0242424	0.177914	0.306667	0.466667	0.325843	0.201923	0.150794
CHHDMR	9635	Bd1-1.CHH	Bd3	32866300	32866499	199	hypo	0.912281	0.956311	0.970874	1	0.974359	0.959184	0.996364	0.607595	0.549296	0.782609	1	0.44	0.690909	0.564516	0.0218978	0.00497512	0.4	0	0.17284	0.19863	0.106825
CHHDMR	9656	Bd1-1.CHH	Bd3	33144800	33144999	199	hypo	0.15	0	0.913793	0	0	0.786517	0	0.125	0	0.454545	0	0	0.523077	0	0.0178571	0.0157068	0.294118	0	0	0.213836	0.011236
CHHDMR	9661	Bd1-1.CHH	Bd3	33239300	33239499	199	hyper	0.787879	0	0	NA	0	0	0	0.727273	0.0192308	0	NA	0.1	0	0.0666667	0.274286	0	0	NA	0	0	0.021978
CHHDMR	9670	Bd1-1.CHH	Bd3	33494100	33494299	199	hyper	0.958333	0.971736	0.983221	0.967262	0.954286	0.974359	0.977242	0.646617	0.694517	0.633588	0.721519	0.629213	0.677419	0.700855	0.226721	0.023199	0.0220126	0.015625	0	0.00988142	0.0175439
CHHDMR	9675	Bd1-1.CHH	Bd3	33589000	33589199	199	hyper	0.957447	0.914842	0.988701	0.957219	0.962963	0.975	0.969372	0.625	0.39759	0.46988	0.428571	0.402597	0.617188	0.519435	0.346667	0.00428266	0.0168776	0.00793651	0.0132743	0.0261097	0.0152284
CHHDMR	9676	Bd1-1.CHH	Bd3	33623700	33623899	199	hypo	0	0.388889	1	NA	0.833333	1	0.625	0	0.407407	0.428571	0.4	0.5	0.470588	0.5	0	0.136986	0.428571	0.363636	0.22	0.377358	0.333333
CHHDMR	9710	Bd1-1.CHH	Bd3	34071800	34072099	299	hypo	0.00316456	0.563601	0.571429	0.62963	0.527964	0.606607	0.00931677	0.00757576	0.270175	0.225	0.0869565	0.302521	0.365385	0.0153509	0.0190024	0.29783	0.365217	0.142857	0.172557	0.261084	0.0188088
CHHDMR	9730	Bd1-1.CHH	Bd3	34448600	34448799	199	hypo	0.75	1	1	NA	1	1	NA	0	NA	0	NA	NA	NA	NA	0	0.224138	0.275862	1	0.4	0.203704	NA
CHHDMR	9752	Bd1-1.CHH	Bd3	34779400	34779699	299	hypo	0.272727	0.972973	0.833333	0.428571	0.166667	0.4	0.428571	0.52381	0.864865	0.727273	1	0	0.166667	0.5	0.025641	0.0205761	0.533333	0	0	0.125	0.285714
CHHDMR	9764	Bd1-1.CHH	Bd3	35018300	35018499	199	hypo	1	0.9	1	1	1	0.928571	1	0.873171	0.884615	0.97	1	0.885417	0.698324	0.780392	0.00833333	0.064	0.604167	0.564103	0.175824	0.519774	0.338028
CHHDMR	9765	Bd1-1.CHH	Bd3	35019300	35019499	199	hypo	0.892857	0.875	0.983957	0.98913	0.986842	0.967742	0.967273	0.5	0.5	0.899281	0.858974	0.896226	0.922018	0.849558	0.00952381	0.027027	0.396825	0.342205	0.154867	0.297297	0.221477
CHHDMR	9768	Bd1-1.CHH	Bd3	35044200	35044399	199	hyper	0.861925	0.886555	0.990741	0.995575	0.964286	0.942708	0.950249	0.685714	0.5	0.538462	0.704545	0.75	0.5125	0.428571	0.27027	0.0444444	0.00699301	0.028777	0.0324324	0.0178571	0.00326797
CHHDMR	9780	Bd1-1.CHH	Bd3	35161100	35161299	199	hypo	0.88	0.933333	1	1	1	NA	1	0.2	0.444444	1	0	0.75	1	0.642857	0.0214286	0.150538	0.267857	0.05	0.0508475	0.0588235	0.169811
CHHDMR	9809	Bd1-1.CHH	Bd3	35676900	35677099	199	hypo	0.806122	0.986111	1	0.923077	0.971429	0.769231	1	0.602564	0.727273	0.727273	1	0.823529	0.75	0.833333	0.0190931	0.0278884	0.225352	0.097561	0.0192308	0.00840336	0.0531915
CHHDMR	9814	Bd1-1.CHH	Bd3	35743500	35743699	199	hypo	0.185185	0.1	0.222222	0	0	0	0.0588235	0.0588235	0.0454545	0.272727	NA	0	0	0.0769231	0.00854701	0.150376	0.363636	0	0.1875	0	0.0365854
CHHDMR	9816	Bd1-1.CHH	Bd3	35772700	35772899	199	hyper	0.917647	0.911308	0.981132	0.964072	0.971591	0.980057	0.975717	0.714286	0.702381	0.709677	0.588235	0.818182	0.657143	0.64	0.211055	0.008	0.0114943	0.0787402	0.0254777	0.0164835	0.117216
CHHDMR	9825	Bd1-1.CHH	Bd3	35892300	35892499	199	hypo	0.88	0.6	1	NA	0.75	0.928571	0.733333	0.717391	0.65	1	NA	1	0.72	0.896552	0.0321101	0.0792079	0.5	NA	0.038961	0.15493	0.0584795
CHHDMR	9830	Bd1-1.CHH	Bd3	35970900	35971099	199	hypo	0.923077	1	0.875	1	1	0.916667	1	0.478261	0.692308	0.833333	1	0.6	0.692308	0.588235	0.0233645	0.112554	0.238806	0	0.111111	0.00787402	0.0119048
CHHDMR	9867	Bd1-1.CHH	Bd3	36706300	36706499	199	hypo	0	0.25	0.130435	0	0.0571429	0	0	0	0	0.133333	0.666667	0	0	0	0	0.176471	0.29	0.552239	0.0693642	0.0888889	0
CHHDMR	9879	Bd1-1.CHH	Bd3	36938100	36938299	199	hyper	0.708861	0.00819672	0.02	0.740741	0.924051	0.978142	0.958199	0.452471	0.013245	0.0149254	0.421569	0.606061	0.604167	0.520455	0.250441	0.00902935	0.00534759	0.038961	0.112621	0.122478	0.0914972
CHHDMR	9929	Bd1-1.CHH	Bd3	37702400	37702599	199	hypo	NA	NA	NA	NA	NA	NA	NA	NA	NA	NA	NA	NA	NA	NA	0	0.268394	0.230971	0.242075	0.372922	0.286957	0.228018
CHHDMR	9946	Bd1-1.CHH	Bd3	37902700	37902899	199	hypo	1	1	0.333333	1	1	1	0.666667	0.866667	0.928571	1	1	1	1	1	0.0111111	0.00606061	0.242424	0.142857	0.136364	0	0.047619
CHHDMR	9999	Bd1-1.CHH	Bd3	38474000	38474199	199	hyper	0.5	0.7	0.538462	0.625	0.571429	1	0.6	0.190476	0	0	0	0.181818	0	0	0.278689	0	0	0	0.0222222	0	0
CHHDMR	10032	Bd1-1.CHH	Bd3	39210200	39210399	199	hypo	0.976744	0.642857	0.571429	0.562044	0.352941	1	0.703704	0	0	0.5	0.594595	1	NA	0.571429	0.0111732	0.309524	0.32987	0.371968	0.441558	0.69697	0.478261
CHHDMR	10058	Bd1-1.CHH	Bd3	39538200	39538399	199	hypo	0.742424	0.8125	0.961538	0.965517	0.906667	0.971014	0.906977	0.341463	0.65625	1	0.619048	0.333333	0.447368	0.707317	0.0422078	0.143322	0.213115	0.037037	0.0769231	0.0932476	0.0835073
CHHDMR	10061	Bd1-1.CHH	Bd3	39551200	39551399	199	hypo	0.923077	0.911392	1	1	0.989474	0.964286	0.941176	0.673913	0.666667	0.759259	0.791667	0.746988	0.805195	0.773438	0.0371901	0.15625	0.350254	0.619718	0.618824	0.46696	0.53717
CHHDMR	10075	Bd1-1.CHH	Bd3	39808900	39809099	199	hypo	1	1	1	NA	NA	1	1	0.666667	1	0.9	NA	NA	0.666667	0.733333	0	0.153846	0.326733	NA	NA	0.208333	0.175926
CHHDMR	10090	Bd1-1.CHH	Bd3	40089000	40089199	199	hypo	0.984375	0.977444	1	0.958904	0.982759	0.926316	0.994318	0.492308	0.742857	0.8	0.759259	0.79661	0.711538	0.775281	0.0239234	0.037037	0.296	0.0990991	0.0310078	0.0851064	0.03003
CHHDMR	10092	Bd1-1.CHH	Bd3	40121700	40121899	199	hyper	0.94773	0.932866	0.984127	0.978437	0.982906	0.965932	0.976905	0.554286	0.523585	0.482143	0.396825	0.416667	0.466019	0.502924	0.374702	0.00961538	0	0.0324074	0.0228311	0.0220264	0.110638
CHHDMR	10147	Bd1-1.CHH	Bd3	41018100	41018299	199	hypo	0.920732	0.923077	0.96347	0.853659	0.882155	0.870614	0.863014	0.76	0.702857	0.807692	0.7875	0.759358	0.75	0.744939	0.0182371	0.142077	0.335897	0.227011	0.226221	0.172857	0.175559
CHHDMR	10200	Bd1-1.CHH	Bd3	42175300	42175499	199	hypo	0.851064	0.769231	0.912281	0.946429	0.930233	0.988235	0.824176	0.813333	0.529412	0.73913	0.914894	0.761905	0.686047	0.65	0.0421217	0.1375	0.317343	0.0564103	0.345029	0.095082	0.292605
CHHDMR	10202	Bd1-1.CHH	Bd3	42237500	42237699	199	hypo	0.857143	1	1	1	0.25	1	1	0	0.0357143	0.0769231	0	0	0	0	0.00980392	0.268817	0.347826	0.1	0.0277778	0.037037	0.289474
CHHDMR	10249	Bd1-1.CHH	Bd3	43110000	43110199	199	hypo	0.952381	0.78125	0.954545	1	0.947368	0.92	0.861111	0.71875	0.647059	0.925926	1	0.863636	0.6	0.952381	0.0138889	0.0874317	0.286713	0	0.0125	0.0225564	0.281633
CHHDMR	10261	Bd1-1.CHH	Bd3	43320300	43320599	299	hyper	0.985755	0.989418	0.986784	0.974265	0.964346	0.979834	0.975637	0.706897	0.69697	0.821782	0.798246	0.754545	0.671233	0.703081	0.444099	0.367647	0.00806452	0.100244	0.0152174	0.174252	0.0431655
CHHDMR	10279	Bd1-1.CHH	Bd3	43676900	43677099	199	hyper	0.5	NA	0	0	0	0.0208333	0.0694444	0	NA	0.0192308	0	0	0.0615385	0	0.529412	NA	0.0116959	0	0	0	0
CHHDMR	10292	Bd1-1.CHH	Bd3	43933000	43933199	199	hyper	0.961268	0.963636	0.973684	0.940341	0.977839	0.971831	0.968647	0.907692	0.902439	0.921569	0.774775	0.903509	0.82	0.858407	0.217877	0.0288184	0	0	0.0163934	0	0.0847145
CHHDMR	10345	Bd1-1.CHH	Bd3	44956400	44956599	199	hyper	0.965116	0.799499	0.983471	0.977215	0.971787	0.971014	0.97331	0.840278	0.843602	0.952381	0.963731	0.912568	0.921951	0.927586	0.265152	0.0931677	0.0229885	0.0392157	0	0.195335	0.343548
CHHDMR	10346	Bd1-1.CHH	Bd3	44974100	44974299	199	hypo	1	1	1	1	NA	0.75	0.9375	0.125	0	0.666667	0	1	0.285714	0.333333	0.0326087	0.21547	0.309524	0.315789	0.28	0.232258	0.318987
CHHDMR	10348	Bd1-1.CHH	Bd3	45012600	45012799	199	hyper	0.978723	0.891841	0.968379	0.981971	0.984222	0.986364	0.988136	0.746888	0.848958	0.727848	0.948454	0.872654	0.779412	0.831754	0.546243	0.411215	0	0	0.00756144	0.214286	0.38447
CHHDMR	10349	Bd1-1.CHH	Bd3	45034700	45034899	199	hypo	0.833333	0.166667	1	1	1	1	1	0.25	0	0.416667	1	0.777778	0.6	0.266667	0	0	0.294872	0	0	0	0.134328
CHHDMR	10357	Bd1-1.CHH	Bd3	45097300	45097499	199	hypo	0.557692	0.521739	0.473684	0	0.483871	0.333333	0.210526	0.1	0.190476	0.230769	0.5625	0.35	0.111111	0.181818	0.040404	0.0816327	0.284091	0.0909091	0.152174	0.027027	0.0909091
CHHDMR	10361	Bd1-1.CHH	Bd3	45143700	45143899	199	hypo	0.982544	0.941624	0.994253	1	0.985185	0.972644	0.980723	0.63354	0.695652	0.661538	0.615385	0.7	0.634483	0.673469	0.0284974	0.0634921	0.271186	0	0.0434783	0.0116279	0.0027248
CHHDMR	10392	Bd1-1.CHH	Bd3	45645900	45646099	199	hyper	0.939024	0.948276	1	1	1	0.931818	0.975	0.822222	0.875	0.827586	1	0.837838	0.75	0.805556	0.238683	0.156398	0.0143885	0.097561	0.0185185	0.0388889	0.102564
CHHDMR	10417	Bd1-1.CHH	Bd3	46034900	46035099	199	hyper	1	0.98	0.947368	1	1	0.97561	1	0.6	0.884615	0.9	0.875	1	0.795455	0.941176	0.235294	0.0101695	0.0163934	0.21875	0	0.031348	0.0102881
CHHDMR	10446	Bd1-1.CHH	Bd3	46542300	46542499	199	hypo	0.028169	0	0.810345	0.190476	0.9	0.38	0.70303	0	0	0.714286	0.153846	0.72093	0.298701	0.43299	0	0.0227273	0.41	0.277778	0.0989583	0.229167	0.0991379
CHHDMR	10455	Bd1-1.CHH	Bd3	46793100	46793299	199	hypo	0.901408	0.921569	1	0.909091	0.970588	0.962264	0.97561	0.246835	0.154412	0.5	0.32	0.444444	0.166667	0.527027	0.0163934	0.0347222	0.217822	0	0.0111732	0.0266667	0.120623
CHHDMR	10463	Bd1-1.CHH	Bd3	46845100	46845299	199	hyper	1	NA	1	NA	0.666667	NA	NA	0	NA	0	NA	0.428571	NA	NA	0.3125	NA	0	NA	0	NA	0
CHHDMR	10466	Bd1-1.CHH	Bd3	46852400	46852599	199	hypo	0	0	0.802817	0	0.728571	0.122449	0	0	0	0.327869	0	0.230769	0.0434783	0	0	0	0.235537	0	0.146179	0.0714286	0
CHHDMR	10470	Bd1-1.CHH	Bd3	46931000	46931199	199	hyper	0.940391	0.965385	0.984375	0.95873	0.956616	0.941873	0.959459	0.818182	0.861111	0.65625	0.886364	0.737705	0.764228	0.428571	0.286713	0	0.0103093	0.0512821	0.0727273	0.288344	0
CHHDMR	10472	Bd1-1.CHH	Bd3	46959500	46959699	199	hypo	0.0882353	0	0.947368	0	0.875	0.153846	0	0.0434783	0	0.73913	0	0.48	0.04	0	0	0.0056391	0.300912	0.0116618	0.126866	0.0117994	0.00247525
CHHDMR	10482	Bd1-1.CHH	Bd3	47180600	47180799	199	hyper	0.973913	0.991935	1	0.989865	0.981693	0.976945	0.930481	0.753333	0.869565	0.9375	0.748792	0.888235	0.892857	0.842105	0.310569	0.180479	0.00634921	0.00333333	0.0112108	0.179431	0.3269
CHHDMR	10533	Bd1-1.CHH	Bd3	47959500	47959699	199	hypo	0.775	0.597403	0.896552	0.804878	0.730769	0.54878	0.638298	0.396552	0.326316	0.567568	0.211538	0.366667	0.39	0.292035	0.0246914	0.138075	0.239669	0.386364	0.100478	0.241007	0.12782
CHHDMR	10653	Bd1-1.CHH	Bd3	50135200	50135399	199	hypo	0	NA	0.25	NA	0.4375	NA	0.5	NA	NA	0	NA	0	NA	0	0	NA	0.337302	NA	0.567442	NA	0.301205
CHHDMR	10658	Bd1-1.CHH	Bd3	50168000	50168199	199	hyper	0.891892	1	0.983607	NA	0.976898	1	0.971491	0.6	0.333333	0.666667	NA	0.88	0.642857	0.730337	0.361702	0.0307692	0.0125786	NA	0	0.442857	0.0373444
CHHDMR	10671	Bd1-1.CHH	Bd3	50402600	50402799	199	hypo	0.95549	0.976708	0.972973	0.00584795	0.988006	0.966887	0.00573066	0.709343	0.755594	0.709524	0	0.782686	0.795699	0	0.012605	0.0117096	0.22093	0.0168067	0.026253	0.194805	0
CHHDMR	10694	Bd1-1.CHH	Bd3	50735300	50735499	199	hypo	0.3	0.347826	0.736842	NA	0.692308	0.444444	0.7	0	0	0	NA	0	0	0	0.0184049	0.107692	0.313725	NA	0.0657895	0.0416667	0.197802
CHHDMR	10695	Bd1-1.CHH	Bd3	50749800	50749999	199	hypo	0.937853	0.948905	0.954545	0.960396	0.981982	0.941176	0.956835	0.393443	0.807692	1	0.689655	0.8125	0.545455	0.855263	0	0.00684932	0.22314	0.0697674	0.0102041	0.0235294	0.114286
CHHDMR	10711	Bd1-1.CHH	Bd3	51140500	51140699	199	hypo	1	0.964286	0.935484	1	0.963636	0.769231	0.950617	0.391304	0.583333	0.545455	0.565217	0.409091	0.6	0.333333	0.0056338	0.130435	0.326531	0.231579	0.258359	0.0740741	0.0888158
CHHDMR	10717	Bd1-1.CHH	Bd3	51228700	51228899	199	hypo	1	1	1	1	0.846154	1	0.833333	0	0.692308	0.5	1	0.4	NA	0	0.0240964	0.252525	0.44898	0.107143	0.212121	0.102564	0.125
CHHDMR	10727	Bd1-1.CHH	Bd3	51397900	51398099	199	hypo	0.953216	0.706522	0.738739	NA	0.8	0.473684	0.625	0.0512821	0.155556	0.210526	NA	0.4	0.538462	0.241379	0.0196507	0.136943	0.262687	NA	0.310345	0.676056	0.279503
CHHDMR	10780	Bd1-1.CHH	Bd3	52339600	52339799	199	hypo	0.956044	0.944444	0.981818	NA	0.978261	1	0.866667	0.659574	0.611111	0.857143	NA	0.785714	0.5	0.5	0.0124224	0	0.274336	NA	0	0.025974	0.03125
CHHDMR	10793	Bd1-1.CHH	Bd3	52512700	52512899	199	hypo	0.983333	0.921569	1	0.898305	1	0.957447	0.945946	0.818182	0.785714	0.763158	0.87931	0.925926	0.59	0.726496	0.0406091	0.0869565	0.292683	0.125	0.138889	0.0625	0.0606061
CHHDMR	10824	Bd1-1.CHH	Bd3	52965400	52965599	199	hypo	0.911111	0.957265	1	1	0.978142	0.955801	0.95	0.692308	0.826087	0.85	0.571429	0.827586	0.735632	0.85	0.0434783	0.145933	0.287554	0.197232	0.352113	0.315249	0.0188679
CHHDMR	10828	Bd1-1.CHH	Bd3	52983400	52983599	199	hypo	NA	NA	NA	NA	1	NA	NA	1	0.5	0	1	0	1	NA	0	0.0983607	0.451613	0.5	0.521127	0.409091	NA
CHHDMR	10873	Bd1-1.CHH	Bd3	53835600	53835799	199	hypo	1	0.75	1	1	1	1	0.909091	0.608696	0.2	0.5	1	0.928571	0.434783	0.4	0	0.0344828	0.235294	0	0.211765	0.1	0.0462963
CHHDMR	10884	Bd1-1.CHH	Bd3	53951000	53951199	199	hyper	0.436364	0	1	0	0.030303	0	0.939024	0.30137	0.00970874	0.739726	0	0.0285714	0	0.674419	0.321637	0	0	NA	0.0185185	0.01	0.0106952
CHHDMR	10903	Bd1-1.CHH	Bd3	54582800	54582999	199	hypo	0.148148	0.176471	0.3	0	0	0	0	0	0.125	0	0	0	0.333333	0.0909091	0.00934579	0.15625	0.225806	0	0.5	0.277778	0.132653
CHHDMR	10911	Bd1-1.CHH	Bd3	54840800	54840999	199	hypo	0.833333	1	1	1	1	0.928571	1	0.0434783	0	NA	0	0	0	0	0.0110497	0.0487805	0.272727	0.02	0.1	0.0272727	0.00666667
CHHDMR	10913	Bd1-1.CHH	Bd3	54876600	54876799	199	hypo	NA	NA	NA	NA	NA	NA	NA	NA	NA	NA	NA	NA	NA	NA	0	0.666667	0.285714	0.277778	0.4375	0.472222	0.352941
CHHDMR	10914	Bd1-1.CHH	Bd3	54877000	54877199	199	hyper	0.062069	0	0.0182927	0	0	0	0.0184332	0.0375	0.047619	0	0	0.046875	0.0277778	0.0214286	0.235294	0.0418848	0.0148515	0	0.00961538	0.0388693	0.0189702
CHHDMR	10938	Bd1-1.CHH	Bd3	55178000	55178199	199	hypo	0	0	1	NA	1	0	NA	0	0	0.5	NA	NA	0	0	0	0.0826446	0.28	0	0.419355	0.213592	0.163265
CHHDMR	10948	Bd1-1.CHH	Bd3	55299400	55299599	199	hyper	0.913043	0.970588	0.965753	0.984127	0.990991	0.970588	0.97416	1	0.82636	0.867299	0.918367	0.872881	0.83165	0.814732	0.478261	0.00662252	0.03125	0.0149813	0.00833333	0.0172684	0.014553
CHHDMR	10950	Bd1-1.CHH	Bd3	55355100	55355299	199	hyper	0.695652	0.857143	0.555556	0.666667	0.709677	0.785714	0.829787	0.387097	0.512821	0.181818	0.2	0.4	0.346154	0.5625	0.341615	0.035	0.0357143	0	0.410526	0.284722	0.230769
CHHDMR	10956	Bd1-1.CHH	Bd3	55393900	55394099	199	hypo	0.9375	0.954545	0.8	0.846154	0.827586	1	0.955556	0.333333	0.354167	0.5	0.125	0.3125	0.466667	0.34375	0.0212766	0.0777778	0.227273	0.175676	0.0754717	0.0754717	0.176101
CHHDMR	10957	Bd1-1.CHH	Bd3	55433200	55433399	199	hypo	0.25	0.77551	0.797468	0.911602	0.947761	0.908163	0.767123	0	0.631579	0.821918	0.807947	0.840708	0.769231	0.545455	0	0.208267	0.239583	0.149533	0.188467	0.217742	0.206681
CHHDMR	10985	Bd1-1.CHH	Bd3	56002500	56002699	199	hypo	1	NA	1	0	1	0.833333	1	0	0.6	0.571429	0.5	0.857143	0.615385	0.888889	0	0.228261	0.361446	0	0.337662	0.217391	0.204082
CHHDMR	11000	Bd1-1.CHH	Bd3	56358400	56358599	199	hypo	0.846154	0.820513	1	0.878788	0.92	0.923077	1	0.526316	0.796748	0.837838	0.666667	0.746835	0.666667	0.692308	0.0185185	0.1883	0.495327	0.142857	0.253394	0.306818	0.112903
CHHDMR	11010	Bd1-1.CHH	Bd3	56500200	56500399	199	hypo	0.0517241	0	0.15	0	0	0	0	0	0	1	0	NA	0	NA	0.0474138	0	0.24	0	0.0454545	0	0
CHHDMR	11015	Bd1-1.CHH	Bd3	56592800	56592999	199	hypo	0.818182	0.916667	1	NA	1	0.846154	0.944444	0.333333	0.833333	1	NA	0.714286	0.842105	0.8	0.0176991	0.142857	0.337662	NA	0.348837	0.37799	0.271709
CHHDMR	11051	Bd1-1.CHH	Bd3	57236900	57237099	199	hypo	0.926471	1	1	0.984615	0.976471	0.615385	0.975806	0.69	0.78125	0.963303	0.943723	0.924638	0.833333	0.891949	0.03207	0.0117647	0.206349	0.0136986	0.0385714	0.010989	0.0392157
CHHDMR	11057	Bd1-1.CHH	Bd3	57302200	57302399	199	hypo	1	1	1	NA	NA	NA	1	0.0344828	0	0	NA	NA	NA	0	0	0	0.2	NA	NA	NA	0
CHHDMR	11063	Bd1-1.CHH	Bd3	57399800	57399999	199	hypo	1	0.957143	0.923077	1	1	1	1	0.714286	0.728571	0.677419	1	0.826087	0.733333	0.87037	0	0.191327	0.272251	0.122222	0.0655738	0.268595	0.152727
CHHDMR	11073	Bd1-1.CHH	Bd3	57585200	57585399	199	hyper	0.115385	0.0789474	0	0.571429	0.625	0.25	0.25	0.205882	0.047619	0	0	NA	NA	NA	0.529412	0.335821	0	0.661765	0.464789	0.768116	0.72093
CHHDMR	11086	Bd1-1.CHH	Bd3	58108400	58108599	199	hypo	0.956897	0.907429	0.932127	0.841785	0.90225	0.95255	0.924635	0.666667	0.590741	0.633745	0.623729	0.608276	0.73271	0.639726	0.0111111	0.138128	0.265136	0.202847	0.164384	0.127182	0.109255
CHHDMR	11090	Bd1-1.CHH	Bd3	58292300	58292499	199	hypo	0.880597	0.333333	0.944444	0.8	1	0.928571	0.9375	0.142857	0	0.5	NA	NA	0.25	0	0.0369128	0.125	0.323529	0	0.375	0.174242	0.174129
CHHDMR	11092	Bd1-1.CHH	Bd3	58317500	58317699	199	hyper	0.825397	0.65	0.811321	0.975309	0.855263	0.907216	0.82659	0.447761	0.6	0.413793	0.483333	0.346939	0.663265	0.45098	0.233577	0.32	0.0337838	0.12	0.158192	0.317857	0.137019
CHHDMR	11100	Bd1-1.CHH	Bd3	58444000	58444199	199	hypo	0.0196078	0.0588235	0.428571	0.1	0.04	0.0540541	0	0	0.166667	0.5	0.153846	0	0.0714286	0	0.0147059	0.126087	0.434783	0.0909091	0.0178571	0.148649	0.186441
CHHDMR	11106	Bd1-1.CHH	Bd3	58732100	58732299	199	hypo	0.117647	0.0833333	0	0	NA	0.3	0.142857	0.037037	0.0454545	0	0	0	0.025	0.025641	0.0306122	0.148148	0.423077	NA	NA	0.20339	0.258065
CHHDMR	11126	Bd1-1.CHH	Bd3	59365800	59365999	199	hypo	0.901099	0.723684	1	0.722222	0.957143	0.62069	0.942857	0.115385	0.261905	0.62963	0.05	0.621951	0.175	0.457447	0.0243161	0.00980392	0.375	0	0.232026	0.00621118	0.206767
CHHDMR	11130	Bd1-1.CHH	Bd3	59719900	59720099	199	hypo	0.917595	0.960526	0.984576	0.961905	0.979167	0.936232	0.975281	0.0692308	0.313725	0.708108	0.0392157	0.0338983	0.0555556	0.147239	0.00692042	0.00606061	0.241463	0	0	0	0
CHHDMR	11141	Bd1-1.CHH	Bd4	165100	165299	199	hyper	0.344828	0	0	0	0	0	0	0.105263	0	0.105263	0	0	0	0	0.275	0	0	0	0.0133333	0	0.0111111
CHHDMR	11157	Bd1-1.CHH	Bd4	459600	459799	199	hypo	0.529412	0.333333	0.714286	0.714286	NA	0.444444	0.4375	0.285714	0.666667	0.666667	0	NA	0.333333	0.444444	0.0121951	0.166667	0.465116	0.142857	NA	0.375	0.116279
CHHDMR	11176	Bd1-1.CHH	Bd4	762800	762999	199	hypo	0.5	0.5	0.5	1	NA	0	0.5	0.125	NA	0.285714	NA	NA	NA	0	0.012987	0.645161	0.51	1	0.545455	1	0.448276
CHHDMR	11178	Bd1-1.CHH	Bd4	784200	784399	199	hypo	0.873016	1	0.942857	0.84375	0.823529	0.794118	0.820513	0.612903	0.833333	0.684211	0.972973	0.733333	0.655172	0.636364	0.0438596	0.172043	0.283154	0.0816327	0.0987654	0.164634	0.155689
CHHDMR	11193	Bd1-1.CHH	Bd4	1145700	1145899	199	hypo	0.842105	0.962963	0.913043	0.902439	0.769231	0.96875	1	0.483871	0.521739	0.625	0.625	0.428571	0.875	1	0.0375587	0.0694444	0.258065	0.151899	0.0540541	0.0384615	0
CHHDMR	11213	Bd1-1.CHH	Bd4	1502200	1502399	199	hypo	0.535714	0.666667	0.571429	NA	NA	1	NA	0	0	0.5	NA	NA	NA	NA	0.010101	0.266667	0.425532	NA	NA	0	NA
CHHDMR	11215	Bd1-1.CHH	Bd4	1583400	1583599	199	hypo	0	0.147368	0.699115	0.572727	0.428571	0	0	0	0.0555556	0.462963	0.5	0.227273	0	0	0.00923077	0.0767123	0.466077	0.258065	0.0993377	0.0122699	0.0137615
CHHDMR	11270	Bd1-1.CHH	Bd4	2516200	2516399	199	hypo	0.105263	0.0588235	0.36	NA	1	0.2	NA	0.0222222	0.05	0.3	NA	0	0.0416667	0	0	0.119048	0.28866	NA	0	0.173077	0
CHHDMR	11273	Bd1-1.CHH	Bd4	2547400	2547599	199	hypo	0.016129	0	0.934959	0.685714	0	0.843284	0	0.0333333	0	0.651316	0.520833	0	0.575758	0	0	0.03	0.232394	0.136364	0.0243902	0.196667	0
CHHDMR	11297	Bd1-1.CHH	Bd4	2933400	2933599	199	hypo	0.685714	0.962025	0.979866	0.983221	0.967914	0.607143	0.805755	0.472727	0.595092	0.765152	0.638783	0.706395	0.531646	0.454545	0.00732601	0.104167	0.273128	0.00664452	0.0220884	0.0309859	0.303226
CHHDMR	11303	Bd1-1.CHH	Bd4	3032700	3032899	199	hypo	0.916667	0.84	0.871795	0.857143	0.818182	0.933333	0.929825	0.429907	0.186667	0.616667	0.357143	0.230769	0.467742	0.3125	0.0234375	0.0490196	0.380952	0.0789474	0.191176	0.19186	0.133772
CHHDMR	11317	Bd1-1.CHH	Bd4	3264500	3264699	199	hyper	0.918367	0.923077	1	1	1	1	0.894118	0.5	0.448276	0	1	NA	0.333333	0.45	0.25	0.283737	0	NA	0	0.0128205	0.306897
CHHDMR	11372	Bd1-1.CHH	Bd4	4475000	4475199	199	hypo	0	0.164706	0.333333	0.307692	0	0.4	0.444444	0.0630631	0.318182	0.615385	0.333333	0	0.375	0.432432	0.0200501	0.221333	0.554286	0.466667	0	0.243902	0.26506
CHHDMR	11395	Bd1-1.CHH	Bd4	4873200	4873399	199	hyper	0.919355	0.881579	0.990654	0.973451	0.666667	0.944664	NA	0.875	0.5625	0.813953	0.91	0.5	0.570652	0.5	0.833333	0.528302	0.0272109	0.0857143	0.333333	0.0389908	0.5
CHHDMR	11403	Bd1-1.CHH	Bd4	5018500	5018699	199	hyper	0.652174	0.0666667	0	NA	NA	NA	1	0.52	0	0	NA	0.807692	0	0.609756	0.312977	0	0	NA	0	0	0.165829
CHHDMR	11422	Bd1-1.CHH	Bd4	5339700	5339899	199	hypo	0.640777	0.727273	0.666667	0.785714	0	0.844828	NA	0.245614	0.08	0.277778	0.545455	0	0.533333	NA	0	0.131579	0.360825	0.2	0	0.344828	NA
CHHDMR	11490	Bd1-1.CHH	Bd4	6288700	6288899	199	hypo	0.925	0.930233	1	1	1	0.94958	0.985507	0.222222	0	0.6	0.666667	0.777778	0.6	0.675676	0.0446429	0.0229885	0.401786	0.152893	0.139098	0.132716	0.118644
CHHDMR	11493	Bd1-1.CHH	Bd4	6294700	6294899	199	hypo	1	NA	0.958333	0.926829	0.905983	0.879121	0.961111	0.285714	0	0.682927	0.7625	0.831858	0.844156	0.789809	0	0	0.480349	0.542263	0.391779	0.506475	0.456563
CHHDMR	11495	Bd1-1.CHH	Bd4	6295300	6295499	199	hypo	NA	NA	0.5	NA	1	1	1	NA	NA	0.5	NA	0	0.5	1	0	0.0212766	0.265306	NA	0.03125	0.333333	0.181818
CHHDMR	11509	Bd1-1.CHH	Bd4	6569600	6569799	199	hyper	0.986301	0.930233	0.988235	1	0.93662	0.991935	0.966825	0.913043	0.83871	0.863636	0.959184	0.954545	0.938272	0.82069	0.59	0.215447	0.0263158	0.0344828	0	0.45098	0.47619
CHHDMR	11515	Bd1-1.CHH	Bd4	6734600	6734799	199	hypo	0.984375	0.97191	0.869565	0.789474	0.847826	0.907407	0.883721	0.705128	0.659259	0.5	0.772727	0.604167	0.717949	0.555556	0.010772	0.0393701	0.292818	0.336957	0.220264	0.054878	0.104972
CHHDMR	11551	Bd1-1.CHH	Bd4	7420400	7420599	199	hyper	0.222222	0	0	NA	0	1	0	0.108108	0.0454545	0	NA	0	0.641509	0.136364	0.221557	0	0	0	0.015873	0	0.0235294
CHHDMR	11562	Bd1-1.CHH	Bd4	7615800	7616099	299	hypo	0.0252101	0.0138889	0.481481	NA	0	0	0	0.0253165	0.0113636	0.4	NA	0.0833333	0	0.114286	0.0112867	0	0.441718	NA	0	0	0.118644
CHHDMR	11581	Bd1-1.CHH	Bd4	7968900	7969099	199	hypo	0.904762	0.526316	0.7	NA	1	0.583333	0.526316	0.0277778	0	0.125	0	0	0.130435	0.230769	0.00689655	0.20155	0.276923	0.166667	0.170213	0.317308	0.306818
CHHDMR	11592	Bd1-1.CHH	Bd4	8116300	8116499	199	hypo	0.722222	0.769912	0.866667	0.930233	0.761905	0.888889	0.68	0	0.125	0.133333	0.318182	0.313725	0.5	0.222222	0.0181818	0.294964	0.402062	0.432624	0.248062	0.145833	0.313725
CHHDMR	11603	Bd1-1.CHH	Bd4	8259000	8259199	199	hyper	0.900929	0.973958	0.988166	0.950081	1	0.859375	0.98327	0.539683	0.513514	0.582278	0.554622	1	0.845745	0.714038	0.277267	0.112948	0.00681431	0.16129	NA	0.307882	0.482555
CHHDMR	11647	Bd1-1.CHH	Bd4	9257500	9257699	199	hypo	0.888889	0.923077	0.92	0	1	1	1	0.586207	0.731343	0.897436	0.460526	0.805556	0.655172	0.819444	0.00729927	0.18	0.297959	0.0208333	0.287356	0.153153	0.116438
CHHDMR	11659	Bd1-1.CHH	Bd4	9439900	9440099	199	hypo	0.466667	0.933333	0.461538	1	0.363636	0.5	0.2	0.125	0.142857	0.0714286	NA	0	0	0	0.036036	0.0576923	0.310811	0	0.03125	0.210526	0.05
CHHDMR	11665	Bd1-1.CHH	Bd4	9617900	9618199	299	hyper	0.381818	0	0	0	0	0	0	0.581673	0	0	0	0.05	0	0	0.320493	NA	0.00985222	0	0.0357143	NA	0.010989
CHHDMR	11675	Bd1-1.CHH	Bd4	9773900	9774099	199	hyper	0.693878	0.0119048	0	0.05	0	0.15	NA	0.691489	0.0121951	0.013986	0.0769231	0	0.0487805	NA	0.264463	0.00530035	0.0150376	0.0483871	0	0	NA
CHHDMR	11682	Bd1-1.CHH	Bd4	9911300	9911499	199	hypo	0.4	0.869565	1	NA	0.956522	1	0.948276	0.333333	0.0322581	0.8	NA	0.166667	0	0.153846	0	0.157407	0.484277	0	0.176471	0.25	0.430921
CHHDMR	11703	Bd1-1.CHH	Bd4	10238600	10238799	199	hyper	0.0862069	0	0	NA	0.0126582	0.025	0	0.0952381	0	0	NA	0	0	0	0.229508	0.0117647	0.0173913	NA	0	0	0.0166667
CHHDMR	11710	Bd1-1.CHH	Bd4	10299300	10299499	199	hypo	NA	NA	NA	NA	NA	NA	NA	NA	1	0.809524	0.5	1	0.944444	0.857143	0.00694444	0.547872	0.45	0.333333	0.234568	0.518595	0.480952
CHHDMR	11711	Bd1-1.CHH	Bd4	10306100	10306299	199	hypo	0.931034	0.947368	0.926829	1	NA	0.948718	0.990654	0.461538	0.7	0.666667	0.6	NA	0.636364	0.588235	0.0149254	0.425	0.383513	0.216667	NA	0.253165	0.346154
CHHDMR	11718	Bd1-1.CHH	Bd4	10352800	10352999	199	hyper	0.909091	0.92	0.989429	0.972938	0.5	0.976966	0.977378	0.75	0.545455	0.77305	0.778032	0.666667	0.811153	0.800451	0.288462	0.0777778	0.0125	0.0207523	0	0.0145858	0.00558092
CHHDMR	11747	Bd1-1.CHH	Bd4	10800400	10800599	199	hyper	0.0859375	0.0753425	0.986486	0.0184049	0.802867	0.864865	0.963235	0.11236	0.0720721	0.24	0.0326797	0.448889	0.0639535	0.109005	0.333333	0.00534759	0.010989	0.00775194	0.0952381	0.0179372	0.0784314
CHHDMR	11752	Bd1-1.CHH	Bd4	10904700	10904899	199	hypo	1	0.826087	1	1	NA	0.777778	1	0.857143	0.6	1	NA	NA	0.833333	0.75	0.0220994	0.380952	0.272727	0	NA	0.166667	0.147059
CHHDMR	11786	Bd1-1.CHH	Bd4	11671700	11671899	199	hypo	0.735849	0	0.181818	0.5	0	0	NA	0	NA	0.333333	0.5	NA	NA	NA	0.0335196	NA	0.40625	0.952381	0	NA	NA
CHHDMR	11797	Bd1-1.CHH	Bd4	11830600	11830799	199	hypo	0.917293	0.957806	0.909091	0	0.987952	0.922619	0.974359	0.37931	0.508475	0.545455	NA	0.636364	0.708333	0.341463	0.0145455	0.180698	0.313953	0	0.293233	0.389049	0.0341463
CHHDMR	11811	Bd1-1.CHH	Bd4	12061600	12061799	199	hypo	0.666667	1	0.75	NA	NA	1	NA	0.25	0.785714	0.6	NA	NA	0.5	NA	0	0.253968	0.333333	NA	NA	0	NA
CHHDMR	11813	Bd1-1.CHH	Bd4	12084800	12084999	199	hyper	0.970588	0.916667	0.984536	0.857143	0.642857	0.78125	0.857143	0.833333	0.676768	0.75	1	0.875	1	0.75	0.38961	0.00614754	0.00212766	0	0	0	0.0416667
CHHDMR	11825	Bd1-1.CHH	Bd4	12361400	12361599	199	hypo	0.972973	1	1	1	1	0.958333	0.903226	0.722222	0.75	0.714286	1	0.6	0.705882	0.8	0.0408163	0	0.212121	0.0588235	0	0	0.0172414
CHHDMR	11838	Bd1-1.CHH	Bd4	12615200	12615399	199	hypo	0.933333	0.953488	0.772727	NA	1	0.641509	0.85	0.392857	0.720339	0.571429	NA	0.6	0.346154	0.8	0.037037	0.0786517	0.333333	NA	0.0769231	0.27193	0.197917
CHHDMR	11844	Bd1-1.CHH	Bd4	12678500	12678699	199	hypo	NA	NA	NA	NA	NA	NA	NA	0.555556	0.333333	1	NA	NA	NA	1	0.0268817	0.533333	0.303951	NA	0.8	0.0666667	0.408072
CHHDMR	11857	Bd1-1.CHH	Bd4	12995600	12995799	199	hyper	0.73913	0.333333	0.896552	0.454545	0.340909	0.142857	0.565217	0.5	0.2	0.0555556	1	0.113636	0	0.0454545	0.345679	0.181818	0	0.384615	0.246575	0.0344828	0.0178571
CHHDMR	11878	Bd1-1.CHH	Bd4	13255400	13255599	199	hypo	1	0.972973	1	1	0.991228	0.986547	0.970297	0.75	0.038961	0.978261	0.954545	0.275362	0.174242	0.0806452	0.015873	0.011236	0.342857	0	0.00595238	0.00740741	0
CHHDMR	11890	Bd1-1.CHH	Bd4	13529800	13529999	199	hyper	0.904762	0.966667	0.684211	0.761905	NA	0.363636	0.655172	0.578947	0.625	0.909091	0.692308	1	0.6	0.692308	0.230769	0.0438596	0.030303	0.176471	0.833333	0.166667	0.156028
CHHDMR	11919	Bd1-1.CHH	Bd4	13858000	13858199	199	hypo	1	0.818182	1	NA	1	1	1	0.333333	0.478261	0.357143	NA	0.8	0.590909	0.533333	0.010101	0.11157	0.273256	NA	0.286624	0.0740741	0.34375
CHHDMR	11921	Bd1-1.CHH	Bd4	13900100	13900299	199	hyper	0.90625	0.967742	0.975248	0.957219	0.971941	0.966276	0.980328	0.419355	0.651515	0.777143	0.381643	0.746903	0.61859	0.754128	0.242857	0.010084	0.0308989	0	0.00418848	0	0.00898204
CHHDMR	11933	Bd1-1.CHH	Bd4	14013900	14014099	199	hypo	0.862069	0.947368	0.9	0.8	0.896552	0.909091	0.948718	0.289474	0.69697	0.631579	0.555556	0.477273	0.62	0.566667	0.0208333	0.08125	0.313725	0.244681	0.142222	0.304348	0.144172
CHHDMR	11954	Bd1-1.CHH	Bd4	14252900	14253099	199	hyper	0.9375	0.944	0.972222	NA	1	0.963636	0.9375	0.5	0.835714	0.85	NA	0.96875	0.869565	0.854054	0.219178	0.0631164	0.0163043	NA	0.00389105	0.011236	0.0242131
CHHDMR	11956	Bd1-1.CHH	Bd4	14258200	14258399	199	hyper	1	0.976879	0.923611	0.970588	0.993671	0.971631	0.966321	1	0.562092	0.577465	0.3125	0.56962	0.627119	0.539326	0.674419	0.0255474	0.015748	0	0	0.203125	0.0651828
CHHDMR	11958	Bd1-1.CHH	Bd4	14296300	14296499	199	hypo	0.25	0.666667	0	0.5	0.5	0.333333	0.363636	0	0	0.285714	0	0	0.142857	0	0	0	0.217391	0	0.25	0	0
CHHDMR	11964	Bd1-1.CHH	Bd4	14411400	14411599	199	hypo	0.917085	0.850575	0.943662	0.9375	0.95082	0.818182	0.945946	0.366906	0.193548	0.407407	0.222222	0.45	0.36	0.48	0.0308582	0.151659	0.244318	0.177778	0.197674	0.339056	0.263039
CHHDMR	11971	Bd1-1.CHH	Bd4	14446900	14447099	199	hypo	0.83871	0.870056	0.9375	0.8125	0.942308	0.945652	0.952096	0.285714	0.448598	0.5	0.6875	0.553957	0.616162	0.461538	0.0257732	0.202429	0.35443	0.354839	0.268657	0.363971	0.232653
CHHDMR	11985	Bd1-1.CHH	Bd4	14537800	14537999	199	hypo	0.762712	0.702703	0.758621	0.940299	0.80303	0.72093	0.831325	0.145833	0.306306	0.524272	0.637584	0.464789	0.242424	0.457143	0.00520833	0.143911	0.330435	0.281081	0.219653	0.309942	0.200717
CHHDMR	11993	Bd1-1.CHH	Bd4	14660400	14660599	199	hypo	0.968085	0.952646	0.972222	0.932927	0.980251	0.944444	0.955224	0.45283	0.582979	0.690141	0.684397	0.673469	0.7	0.847458	0.0322581	0.124	0.259259	0.0325203	0.0182648	0	0
CHHDMR	12011	Bd1-1.CHH	Bd4	14971500	14971699	199	hypo	0.961165	0.981481	0.987654	0.884615	0.953757	0.972696	0.982387	0.70936	0.731801	0.78481	0.657718	0.114583	0.637931	0.818182	0.0107239	0.0147368	0.488491	0.336683	0	0.0517711	0.332198
CHHDMR	12021	Bd1-1.CHH	Bd4	15199400	15199599	199	hypo	0.526316	0.605263	0.821429	0.85	1	0.95	0.736842	0.4	0.571429	0.272727	0.619048	1	0.909091	0.666667	0.00526316	0.190083	0.220779	0.139785	0	0.229167	0.263636
CHHDMR	12028	Bd1-1.CHH	Bd4	15267800	15267999	199	hyper	0.965278	0.885584	0.989474	0.987879	0.761261	0.989011	0.842424	0.515504	0.537234	0.55	0.634921	0.489362	0.602339	0.572289	0.39738	0.213166	0.0277778	0	0.0267857	0.594862	0.00333333
CHHDMR	12031	Bd1-1.CHH	Bd4	15290500	15290699	199	hyper	1	0.6	0.978261	0.960352	NA	1	1	1	1	0.767241	0.915254	NA	1	0.923077	0.961538	0.5	0.011811	0.0566038	NA	0.964286	0.737864
CHHDMR	12033	Bd1-1.CHH	Bd4	15307800	15307999	199	hypo	0.886364	0.666667	1	NA	NA	1	0.842105	0.863636	1	0.625	NA	NA	NA	0.583333	0.0135135	0	0.472222	NA	NA	0	0.296296
CHHDMR	12046	Bd1-1.CHH	Bd4	15456400	15456599	199	hypo	0.952	0.946429	0.988889	0.965517	1	0.977273	0.969828	0.43662	0.571429	0.657143	0.590909	0.676471	0.418605	0.438776	0.0199115	0.0453939	0.35	0.191919	0.168627	0.0866013	0.0293686
CHHDMR	12071	Bd1-1.CHH	Bd4	15800400	15800599	199	hypo	0.737113	0.871734	0.823529	0.749373	0.552448	0.0106007	0.00840336	0.0294118	0.336134	0.565217	0.302083	0.384615	0.0136986	0.0151515	0.00363636	0.14375	0.653061	0.0857143	0.311111	0	0
CHHDMR	12083	Bd1-1.CHH	Bd4	16040800	16040999	199	hyper	0.684211	0.491525	1	1	0.8125	0.8	0.464286	0.395833	0.428571	0.875	NA	0.714286	0.230769	0.352941	0.226131	0.11	0	NA	0.0294118	0.197183	0.283784
CHHDMR	12094	Bd1-1.CHH	Bd4	16189200	16189399	199	hypo	0.961538	1	0.5	NA	0	NA	0.666667	0.66	0	0.578947	0	0	0	0.314286	0.0141844	0.0166667	0.23	0	0	0	0.0215517
CHHDMR	12124	Bd1-1.CHH	Bd4	16817000	16817199	199	hyper	1	1	1	1	1	0.95	1	0.125	0.829545	0.910448	0.857143	0.88	0.808219	0.92623	0.338028	0	0.00674157	0	0.00609756	0.00892857	0.00553506
CHHDMR	12167	Bd1-1.CHH	Bd4	17591700	17591899	199	hypo	1	0.868852	0.932432	1	0.974576	0.9375	0.908108	0	0.636364	0.75	0.5	0.740741	0.736842	0.631579	0	0.209697	0.285714	0.350746	0.300676	0.16426	0.190826
CHHDMR	12172	Bd1-1.CHH	Bd4	17649100	17649299	199	hypo	0.941176	0.913462	0.948276	0.866667	0.928571	0.904762	0.86631	0.611111	0.6	0.708333	0.8	0.8	0.666667	0.733333	0.0468986	0.109223	0.447368	0.00657895	0.318555	0.304802	0.286136
CHHDMR	12191	Bd1-1.CHH	Bd4	17840200	17840399	199	hypo	0.97619	0.974026	1	1	0.982759	0.96	0.986667	0.741379	0.837209	0.717391	0.891892	0.780822	0.898551	0.917526	0	0.011194	0.215517	0.0136986	0.0416667	0	0
CHHDMR	12194	Bd1-1.CHH	Bd4	17859800	17859999	199	hyper	0.982609	0.925816	0.990741	0.944345	0.981283	0.99	0.972509	0.842105	0.333333	0.552632	0.441441	0.657534	0.520833	0.627119	0.285714	0.00826446	0	0.0191388	0.0131579	0.02	0.0263158
CHHDMR	12201	Bd1-1.CHH	Bd4	17950500	17950799	299	hypo	0.914894	0.954955	0.969697	0.952381	1	0.966292	0.939759	0.518987	0.253521	0.468085	0.692308	0.666667	0.333333	0.477273	0.0278552	0.132497	0.23029	0.0926829	0.0396825	0.0422535	0.107829
CHHDMR	12223	Bd1-1.CHH	Bd4	18233000	18233199	199	hypo	0.919355	0.955882	0.904762	1	0.842105	0.490566	0.967213	0.804196	0.827815	0.724138	0.83871	0.788618	0.365854	0.798742	0.0182186	0.118919	0.242038	0.0779221	0.0649718	0.151442	0.0492505
CHHDMR	12233	Bd1-1.CHH	Bd4	18396400	18396599	199	hypo	0.947917	0.979592	1	NA	0.947368	1	0.954545	0.873684	0.918919	0.969697	NA	0.84	0.916667	0.823529	0.021875	0.0634921	0.208955	NA	0.0175439	0.0111732	0
CHHDMR	12246	Bd1-1.CHH	Bd4	18509500	18509699	199	hypo	0.03125	0.458333	0.87963	0.761905	0.657895	0.580645	0.638158	0.166667	0.25	0.488889	0	0.272727	0.391304	0.4	0	0.134615	0.226277	0	0.10101	0.0416667	0.0632184
CHHDMR	12252	Bd1-1.CHH	Bd4	18590600	18590799	199	hypo	0.95082	0.844444	0.8	1	0.96875	0.89899	0.736842	0.43662	0.220779	0.37931	0.195122	0.342857	0.34375	0.19469	0.0373444	0.117284	0.323529	0	0	0.142857	0.0888889
CHHDMR	12254	Bd1-1.CHH	Bd4	18621600	18621899	299	hypo	0.5	0.821429	0.780488	1	0.884615	0.833333	0.876712	0.156627	0.0555556	0.275362	0	0.25	0.257576	0.347826	0.00735294	0.1	0.312796	0	0.0526316	0.0769231	0.0188679
CHHDMR	12266	Bd1-1.CHH	Bd4	18848700	18848899	199	hyper	0.96	0.966736	0.981651	0.926829	0.989583	0.949721	0.951299	0.745098	0.608511	0.714286	0.658537	0.633333	0.533333	0.623377	0.218487	0.00689655	0.00621118	0.0222222	0.013468	0.00411523	0.0138169
CHHDMR	12278	Bd1-1.CHH	Bd4	19099400	19099599	199	hypo	0.833333	0.6	NA	1	0.5	NA	1	0.875	1	1	1	1	1	0.8	0.0261438	0.029661	0.287671	0.054878	0.0373832	0.0469799	0.0227273
CHHDMR	12306	Bd1-1.CHH	Bd4	19689900	19690099	199	hypo	0.933333	0.882353	0.944444	1	0.911765	1	0.95	0.857143	0.571429	0.818182	0.4	0.8	0.75	0.533333	0.00787402	0.149425	0.472727	0	0.0769231	0.0462963	0.030303
CHHDMR	12324	Bd1-1.CHH	Bd4	20014900	20015099	199	hypo	0.6	0.2	0.75	0.2	0.2	0.181818	0	0	0.166667	0	0	0	0	0	0.008	0.121387	0.325301	0.330275	0.0857143	0.131687	0.00393701
CHHDMR	12391	Bd1-1.CHH	Bd4	21002400	21002599	199	hypo	0.954545	0.95	1	1	0.953488	0.875	0.95	0.555556	0.511111	0.714286	0.652174	0.588235	0.453125	0.666667	0.0162162	0	0.315789	0	0.0165289	0	0.0273973
CHHDMR	12401	Bd1-1.CHH	Bd4	21197300	21197499	199	hyper	0.666667	0.727273	1	1	0.6	1	0.5	0.75	0.8	0.6	0.666667	0.333333	0.8	0.8	0.385965	0.0183824	0.0198675	0.102941	0.0102041	0.00819672	0.0246575
CHHDMR	12424	Bd1-1.CHH	Bd4	21427100	21427299	199	hypo	0.882979	0.983122	0.952381	0.985915	0.991653	0.95941	0.966019	0.5	0.698795	0.642857	0.604167	0.478571	0.686747	0.383838	0.030303	0.801075	0.65	0.15625	0.015625	0.0227273	0.128378
CHHDMR	12446	Bd1-1.CHH	Bd4	21774800	21775099	299	hypo	1	0.983278	0.865801	0.969512	0.869955	0.859873	0.977816	0.428571	0.555556	0.6	0.701987	0.635922	0.627907	0.613445	0	0.130919	0.392354	0.117754	0.40364	0.495833	0.140914
CHHDMR	12448	Bd1-1.CHH	Bd4	21795700	21795899	199	hypo	1	1	0.875	1	NA	0.909091	1	NA	NA	NA	NA	NA	NA	NA	0	0.110714	0.286765	0.102804	0.166124	0.118902	0.0964467
CHHDMR	12455	Bd1-1.CHH	Bd4	21959700	21959899	199	hypo	0.125	0.5	0.75	0.5	0	0.615385	0.916667	0	0	0.5	1	0	0.333333	0.6	0.0294118	0.162162	0.378947	0.235294	0	0.297872	0.125
CHHDMR	12460	Bd1-1.CHH	Bd4	22040000	22040199	199	hypo	0.5	1	NA	1	1	1	1	0.875	0.727273	1	1	0.571429	0.875	0.909091	0.0203046	0.0100671	0.25	0.0510204	0.0246914	0.0487013	0.0441176
CHHDMR	12466	Bd1-1.CHH	Bd4	22088200	22088399	199	hyper	0.83871	0.976056	0.96748	0.992248	0.979592	0.954373	0.981651	0.875	0.696774	0.578125	0.693878	0.776119	0.632	0.591837	0.618182	0.177419	0.00364964	0.00724638	0	0.0101266	0.14456
CHHDMR	12476	Bd1-1.CHH	Bd4	22285100	22285299	199	hyper	NA	NA	NA	NA	NA	NA	NA	NA	NA	NA	NA	NA	NA	NA	0.236434	0	0.0277778	0	0.0746269	0.012987	0.0576923
CHHDMR	12525	Bd1-1.CHH	Bd4	23042900	23043099	199	hypo	0.969925	0.921569	1	0.974026	0.9625	0.934911	0.98	0.862205	0.838889	0.785714	0.914286	0.722222	0.753086	0.848276	0.0262443	0.375474	0.42623	0.594156	0.342342	0.394277	0.451043
CHHDMR	12533	Bd1-1.CHH	Bd4	23213300	23213499	199	hyper	0.890323	0.961165	0.984127	1	0.981308	0.983673	0.981191	0.533333	0.858824	0.785714	0.758621	0.813953	0.831933	0.795775	0.3	0.00490196	0	0	0.0196078	0.0394089	0.0304054
CHHDMR	12536	Bd1-1.CHH	Bd4	23263000	23263299	299	hypo	0.9	0.98913	1	1	1	0.982759	0.969072	0.363636	0.878378	0.785714	0.965517	0.846154	0.862069	0.782609	0.0151515	0.0941597	0.236162	0.155642	0.236667	0.221649	0.192135
CHHDMR	12541	Bd1-1.CHH	Bd4	23312300	23312499	199	hypo	0.8125	1	0.8	1	1	0.75	0.954545	0.217391	0.857143	0.909091	1	0.5	0.846154	0.76	0.00404858	0.203883	0.238462	0.0625	0.105263	0.141593	0.122388
CHHDMR	12548	Bd1-1.CHH	Bd4	23375100	23375299	199	hypo	NA	1	1	1	1	1	1	0	0	0.142857	0	0.0769231	0	0.117647	0.0120482	0.0837696	0.32	0	0.206612	0.0350877	0.182741
CHHDMR	12560	Bd1-1.CHH	Bd4	23548800	23548999	199	hypo	1	1	1	1	1	1	1	0.333333	0.708333	0.538462	0.666667	0.454545	0.1	0.6	0	0.302752	0.242857	0	0.27027	0.0555556	0.0416667
CHHDMR	12573	Bd1-1.CHH	Bd4	23716800	23716999	199	hypo	NA	0.285714	0.2	NA	0.666667	0.666667	0	NA	NA	NA	NA	NA	NA	NA	0.0258621	0.243902	0.413043	NA	0.166667	0.504673	0.188406
CHHDMR	12625	Bd1-1.CHH	Bd4	24430400	24430599	199	hypo	0.93617	0.948905	0.971429	0.986667	0.983607	0.981818	0.953125	0.822967	0.669492	0.833333	0.825397	0.746667	0.786408	0.766667	0.03125	0.0196078	0.213235	0	0.025	0.0385488	0.0311111
CHHDMR	12638	Bd1-1.CHH	Bd4	24649900	24650099	199	hypo	0.951807	0.982014	0.970464	0.977169	0.988462	0.946488	0.96875	0.0672269	0.134228	0.746269	0.617021	0.227941	0.054878	0.0862069	0.0182482	0.0232558	0.486647	0	0	0	0.125984
CHHDMR	12649	Bd1-1.CHH	Bd4	24944600	24944799	199	hypo	1	1	1	1	NA	1	1	0.6	1	0.8	NA	NA	1	1	0.0124224	0	0.510417	0	NA	0	0
CHHDMR	12703	Bd1-1.CHH	Bd4	25810200	25810399	199	hyper	1	0.959391	0.986301	0.985612	0.99373	0.977974	0.995261	0.875	0.71564	0.78	0.766667	0.795518	0.800725	0.738255	0.578313	0.0161002	0.0207254	0.0273038	0.0184843	0.0549898	0.427928
CHHDMR	12756	Bd1-1.CHH	Bd4	26562900	26563099	199	hypo	0.966292	0.958333	1	0.857143	1	0.972222	1	0.285714	0.470383	0.562092	0.328638	0.917772	0.393939	0.427119	0.0108696	0.0027248	0.33871	0.257143	0.0858144	0.00446429	0.182898
CHHDMR	12773	Bd1-1.CHH	Bd4	26815400	26815599	199	hyper	0.8	0.937063	0.975	0.969055	0.973684	0.959799	0.962154	0.733333	0.583162	0.665595	0.677494	0.633242	0.579048	0.640801	0.3	0.00864398	0.0043956	0.00475687	0.00983405	0.0153986	0.00814775
CHHDMR	12815	Bd1-1.CHH	Bd4	27335500	27335699	199	hypo	1	1	1	0.961538	1	1	1	0.863636	0.565217	0.357143	0.916667	1	0.7	0.909091	0.0346535	0.156425	0.301075	0.0223464	0	0.461538	0.0324324
CHHDMR	12818	Bd1-1.CHH	Bd4	27348500	27348699	199	hypo	0.921569	0.956522	0.916667	0.922414	0.960784	0.911111	0.96063	0.347826	0.416667	0.75	0.307692	0.47619	0.571429	0.3	0.0120192	0.20524	0.209302	0.0869565	0.0904762	0.208178	0.0771605
CHHDMR	12827	Bd1-1.CHH	Bd4	27535000	27535199	199	hyper	0.746032	0.28	0.952381	0.722222	0.833333	0.636364	0.695652	0.2	0.0952381	0.928571	0	NA	0	NA	0.213033	0.027933	0.0211268	0.473684	0.189655	0.22	0.259259
CHHDMR	12828	Bd1-1.CHH	Bd4	27543500	27543699	199	hypo	0.963415	0.938272	1	1	0.92053	0.980769	0.971751	0.333333	0.658537	0.5	1	0.596154	0.395833	0.636364	0.0252101	0.0848708	0.235602	0	0.0198675	0.0689655	0.119134
CHHDMR	12840	Bd1-1.CHH	Bd4	27722900	27723099	199	hyper	0.983871	0.985782	0.961039	1	0.727273	0.937008	1	0.712121	0.651786	0.632653	NA	0	0.678571	0.718447	0.276786	0	0.02	NA	0	0.0185185	0.131737
CHHDMR	12865	Bd1-1.CHH	Bd4	27997800	27997999	199	hypo	0.923729	0.988636	0.984026	0.98254	0.984448	0.985714	0.980892	0.53125	0.454545	0.72067	0.646875	0.642202	0.671533	0.582375	0	0.247059	0.678571	0.298429	0.0362319	0.397476	0.487578
CHHDMR	12870	Bd1-1.CHH	Bd4	28116300	28116599	299	hyper	0.826087	0.986301	1	NA	0.967213	0.955307	0.985075	0.4375	0.733333	0.804878	NA	0.878049	0.854167	0.711111	0.30303	0.0134933	0	NA	0.0100503	0.0133588	0.0233918
CHHDMR	12878	Bd1-1.CHH	Bd4	28199100	28199299	199	hypo	0	0	0.5	0.666667	0	0.25	0.0588235	0	0	0.692308	0.352941	0.25	0.190476	0	0.0246305	0.00869565	0.333333	0.25	0.233333	0.0615385	0.0242424
CHHDMR	12887	Bd1-1.CHH	Bd4	28322600	28322799	199	hypo	0.958333	0.911111	1	1	0.84	0.764706	0.883333	0.5	0.518519	0.84	0.75	0.666667	1	0.826087	0.0366972	0.358491	0.327869	0	0.133333	0.275281	0.301538
CHHDMR	12893	Bd1-1.CHH	Bd4	28396000	28396199	199	hypo	0.6875	0.878049	0.933333	1	0.75	0.923077	0.821429	0	0	0	0	0	0	0.111111	0.011194	0.0193906	0.237037	0	0.0606061	0.0978261	0.108374
CHHDMR	12910	Bd1-1.CHH	Bd4	28688800	28689099	299	hyper	0.963134	NA	0.959559	0.975177	0.95082	NA	0.982619	0.493151	NA	0.380952	0.595506	0.557377	NA	0.459677	0.298805	NA	0.00383142	0.159021	0.128492	NA	0.213559
CHHDMR	12920	Bd1-1.CHH	Bd4	28740400	28740599	199	hypo	0.2	NA	0.333333	0	0	NA	0.441176	0	NA	0.571429	0.333333	0	NA	0.261905	0	0	0.450704	0	0.0384615	NA	0.316832
CHHDMR	12929	Bd1-1.CHH	Bd4	28854900	28855099	199	hypo	0.953846	0.977778	0.25	0.416667	0.232558	0.985714	0.273973	0.75817	0.823529	0.285714	0.666667	0.254902	0.866667	0.380531	0.0270936	0.0365854	0.223776	0.09375	0.178571	0	0.150888
CHHDMR	12936	Bd1-1.CHH	Bd4	29016600	29016899	299	hypo	0.908163	0.836364	0.871795	0.846154	0.444444	1	0.829268	0.807018	0.357143	0.666667	1	0.857143	1	0.842105	0.0136986	0.0680628	0.439394	0.0232558	0.125	0.0322581	0.164384
CHHDMR	12940	Bd1-1.CHH	Bd4	29120600	29120799	199	hypo	0.4375	0.944444	0.45	0	1	0.857143	0.47619	0	0.388889	0.2	NA	NA	0	0.266667	0.010101	0.135802	0.221154	0	0	0.0240964	0.0666667
CHHDMR	12968	Bd1-1.CHH	Bd4	29568700	29568899	199	hypo	0.956989	0.931034	0.934211	1	0.8125	0.894737	0.833333	0.5625	0.555556	0.516129	0.75	0.684211	0.785714	1	0.0321285	0.224138	0.355932	0.0952381	0.0847458	0.366667	0.368421
CHHDMR	12970	Bd1-1.CHH	Bd4	29644100	29644299	199	hyper	0.833333	NA	0.5	NA	NA	1	1	0.666667	NA	1	NA	NA	1	1	0.368421	NA	0	NA	NA	0.2	0.352941
CHHDMR	13014	Bd1-1.CHH	Bd4	30384300	30384499	199	hypo	0.25	0	0	NA	NA	NA	NA	0.333333	0.111111	0.2	0	NA	0	0.25	0.0285714	0.00909091	0.344828	0	NA	0	0.030303
CHHDMR	13027	Bd1-1.CHH	Bd4	30680200	30680399	199	hypo	0.967742	1	1	1	0.741935	1	1	0.886364	0.786408	0.945946	0.972973	0.697368	0.714286	0.788462	0.0276074	0.0158311	0.29932	0.252101	0.131868	0	0.0298165
CHHDMR	13035	Bd1-1.CHH	Bd4	30744200	30744399	199	hyper	0.969697	0.888889	1	NA	1	0.961538	0.931034	0.363636	0.75	1	NA	0	0.518519	0.454545	0.336634	0	0.0175439	NA	0.333333	0.127907	0.0365854
CHHDMR	13038	Bd1-1.CHH	Bd4	30790500	30790699	199	hypo	0.828452	0.692754	0.88806	0.869159	0.92093	0.9375	0.931624	0.552885	0.452229	0.535714	0.788991	0.619658	0.665428	0.602857	0.039801	0.124528	0.284133	0.0882353	0.138235	0.102	0.117808
CHHDMR	13044	Bd1-1.CHH	Bd4	30937200	30937399	199	hyper	0.977679	0.861765	0.901961	0.833333	0.0689655	NA	0.962406	0.445783	0.324561	0.4	0	0	0	0.531915	0.351562	0.0491803	0	0	0	0	0.55914
CHHDMR	13066	Bd1-1.CHH	Bd4	31429500	31429699	199	hypo	0.933333	0.929577	0.692308	0.774194	0.966667	0.878788	0.772727	0.0972222	0.168142	0.48	0.225	0.314815	0.428571	0.129032	0.00481928	0.00775194	0.322222	0	0.0583658	0.05	0.064
CHHDMR	13077	Bd1-1.CHH	Bd4	31558300	31558499	199	hypo	0.852941	NA	1	NA	NA	0.913043	1	1	NA	1	NA	NA	0.833333	1	0.0246914	NA	0.265625	NA	NA	0.00884956	0.0225564
CHHDMR	13087	Bd1-1.CHH	Bd4	31773800	31773999	199	hypo	0.923077	1	1	NA	1	1	1	0.928571	1	0.666667	NA	1	1	1	0	0	0.48	NA	0	0	0
CHHDMR	13120	Bd1-1.CHH	Bd4	32264700	32264899	199	hypo	1	1	1	1	NA	1	1	0.666667	0	1	NA	NA	NA	0.5	0.0340909	0.161765	0.393443	0.2	NA	0.0833333	0.320988
CHHDMR	13131	Bd1-1.CHH	Bd4	32364800	32364999	199	hypo	NA	NA	NA	NA	NA	NA	NA	NA	1	0.888889	0.666667	0.869565	0.84375	1	0.0233918	0.440909	0.528139	0.513514	0.427966	0.342857	0.177165
CHHDMR	13132	Bd1-1.CHH	Bd4	32423300	32423499	199	hypo	0.666667	1	1	1	1	1	1	0.2	1	1	0.909091	0.875	0.777778	1	0	0.75	0.428571	0.265957	0.176471	0.4	0.307692
CHHDMR	13136	Bd1-1.CHH	Bd4	32440800	32440999	199	hypo	0.807339	0.946429	0.966667	0.955556	0.933333	0.90625	0.98	0.678571	0.636364	0.5625	0.5	0.529412	0.708333	0.612903	0.0458015	0.482906	0.316176	0.269231	0.328302	0.304054	0.29661
CHHDMR	13143	Bd1-1.CHH	Bd4	32480700	32480899	199	hypo	0.794872	0.94697	0.955882	0.983193	0.986842	0.878788	0.904153	0.473684	0.897143	0.801471	0.845361	0.862434	0.825688	0.838906	0	0.337329	0.397129	0.326582	0.426174	0.533333	0.361373
CHHDMR	13146	Bd1-1.CHH	Bd4	32497700	32497899	199	hypo	0.711111	0.62963	0.695652	0.65	0.878788	0.807692	0.674419	0.0454545	0.0666667	0.263158	0.176471	0.357143	0.166667	0.0555556	0.015625	0.0307692	0.228571	0.314721	0.364486	0.0972222	0.163265
CHHDMR	13147	Bd1-1.CHH	Bd4	32499800	32499999	199	hypo	0.954545	0.991597	0.982143	1	0.902439	0.934066	1	0.87013	0.871795	0.625	0.833333	0.756757	0.9	0.904762	0.0274809	0.0688623	0.378882	0.122222	0.140523	0.0227848	0.0327103
CHHDMR	13159	Bd1-1.CHH	Bd4	32699000	32699199	199	hypo	0.406897	0.317073	0.535714	0.524194	0.602339	0.415584	0.379747	0.05	0	0.0526316	0	0	0	0.0694444	0.0197239	0.0464345	0.350877	0.181159	0.263514	0.203448	0.1825
CHHDMR	13192	Bd1-1.CHH	Bd4	33280600	33280799	199	hypo	0.166667	1	1	1	1	1	1	0.638298	0.7625	0.943396	0.941176	0.928571	0.823529	0.758242	0.0366972	0.219638	0.28934	0.20339	0.14876	0.103704	0.198171
CHHDMR	13200	Bd1-1.CHH	Bd4	33352900	33353199	299	hyper	0.782407	0.357143	0.666667	0.47619	0.927711	0.5625	0.494505	0.429412	0.2	0.15	0.117647	0.390625	0.355556	0.155844	0.252632	0.108911	0.00655738	0	0.0422343	0.0841751	0.071599
CHHDMR	13235	Bd1-1.CHH	Bd4	33938400	33938599	199	hypo	1	1	0.75	1	0.8	1	NA	0.767442	0.709091	1	1	0.913043	0.596491	1	0.0167364	0.0533808	0.34058	0.0294118	0.175676	0.05	0
CHHDMR	13246	Bd1-1.CHH	Bd4	34100900	34101099	199	hyper	0.885714	NA	0.939394	1	0.978667	0.888889	0.966981	0.866667	NA	0.692308	0.923077	0.88172	1	0.819672	0.825	NA	0	0	0	NA	0.292308
CHHDMR	13248	Bd1-1.CHH	Bd4	34112000	34112199	199	hyper	0.461538	0.352941	0	0	0	0.5	0.020202	0.545455	0.428571	0.0434783	0	0	0.678571	0	0.514793	0.135135	0	0	0.00465116	0.804688	0.00392157
CHHDMR	13257	Bd1-1.CHH	Bd4	34274100	34274299	199	hypo	1	0.666667	0.966667	0.928571	0.906977	1	0.948718	0.173913	0	0.25	0.285714	0.235294	0.285714	0.214286	0	0	0.368421	0.0769231	0.0357143	0	0.0655738
CHHDMR	13269	Bd1-1.CHH	Bd4	34371400	34371599	199	hypo	0.833333	1	1	0.142857	0.0909091	0	0.0952381	0.571429	0.615385	0.166667	0.125	0	0	0	0.010101	0.092437	0.346939	0.142857	0.115385	0.0909091	0.08
CHHDMR	13275	Bd1-1.CHH	Bd4	34446300	34446499	199	hypo	1	0.924242	0.954545	0.955224	0.923077	0.977273	1	0.6	0.802632	0.9	0.95122	0.8125	0.916667	0.75	0.0133333	0.174721	0.329897	0.197183	0.162162	0.212644	0.146067
CHHDMR	13277	Bd1-1.CHH	Bd4	34469900	34470099	199	hypo	0.953125	0.981818	1	NA	1	1	0.888889	0.557143	0.722222	1	NA	0.714286	0.857143	0.857143	0.0332103	0.0658436	0.260563	0	0	0.388889	0
CHHDMR	13313	Bd1-1.CHH	Bd4	35210000	35210199	199	hypo	0.863636	0.679245	0.868421	1	1	0.901408	0.797872	0.738095	0.652174	0.705882	1	0.75	0.681818	0.888889	0.00507614	0.0983607	0.3	0	0.037037	0.0805369	0.0428571
CHHDMR	13317	Bd1-1.CHH	Bd4	35254500	35254699	199	hypo	0.954545	1	0.904762	1	0.75	1	1	1	1	0.833333	0	NA	NA	1	0.027027	0.0268817	0.297468	0	0.0877193	NA	0.0898876
CHHDMR	13322	Bd1-1.CHH	Bd4	35411100	35411299	199	hypo	0.818182	0.510638	0.72973	0.8125	0.717949	0.285714	0.766667	0.204545	0.172414	0.541667	0.3	0.333333	0	0.636364	0.037037	0	0.333333	0	0.0227273	0	0.0340909
CHHDMR	13344	Bd1-1.CHH	Bd4	35685700	35685899	199	hyper	0.82	0.964286	0.932432	1	0.809524	0.972851	0.974596	0.916667	0.6	0.6	1	1	0.576923	0.768595	0.43299	0.016129	0.0121212	0	0	0.00689655	0.317647
CHHDMR	13365	Bd1-1.CHH	Bd4	36035700	36035899	199	hypo	1	1	0.888889	1	1	0.967742	1	0.65	0.62963	1	0.5	0.913043	0.315789	0.72	0.0191571	0.0738255	0.314607	0.114094	0.0701754	0.0145631	0.0901961
CHHDMR	13376	Bd1-1.CHH	Bd4	36273600	36273799	199	hyper	1	NA	1	NA	0.75	0.8	1	0.666667	0.666667	1	1	0.826087	0.741935	0.8125	0.314381	0	0	0.0625	0.547619	0.449591	0
CHHDMR	13390	Bd1-1.CHH	Bd4	36567000	36567199	199	hypo	0.402597	0.3125	0.708333	1	1	0	0.666667	0.28	0.315789	0.48	0.4	0.4	0.272727	0.457143	0.03125	0	0.339623	0.0714286	0.114286	0	0.16
CHHDMR	13396	Bd1-1.CHH	Bd4	36624800	36624999	199	hypo	0.976923	1	0.953488	0.875	1	1	1	0.4	0.47619	0.566667	0.8	0.5	0.666667	NA	0.0385675	0.0683761	0.211538	0	0.0588235	0.0625	0
CHHDMR	13430	Bd1-1.CHH	Bd4	37062200	37062399	199	hypo	0.666667	0.363636	0.4	0.111111	0.809524	0.307692	0.6	0.0714286	0	0.333333	0	0	0	0	0.015625	0.0505051	0.488372	0.121212	0.2125	0.191176	0.216216
CHHDMR	13465	Bd1-1.CHH	Bd4	37477300	37477499	199	hypo	0.88	0.907407	1	1	0.961538	1	1	0.642857	0.617647	0.56	0.6	0.545455	0.625	0.641026	0.00628931	0.0214286	0.318182	0.0714286	0.0240964	0.0229008	0.0784314
CHHDMR	13480	Bd1-1.CHH	Bd4	37696600	37696799	199	hypo	0.95614	0.888889	0.957746	0.920792	0.930556	0.958678	0.942857	0.775148	0.604278	0.658824	0.761538	0.723684	0.759398	0.751412	0.0337995	0.174757	0.225086	0.371652	0.106422	0.222104	0.234646
CHHDMR	13511	Bd1-1.CHH	Bd4	38055700	38055899	199	hypo	0.15	0.6	0.434783	0.4	0.75	0.52	0.666667	0.0869565	0.378378	0.457143	0.375	0.619048	0.477273	0.423077	0	0.203593	0.305195	0.148148	0.459722	0.0718954	0.136364
CHHDMR	13513	Bd1-1.CHH	Bd4	38079900	38080099	199	hypo	0.774194	0.876623	1	0.938596	0.909091	0.925	0.955128	0.368421	0.614286	0.821918	0.88764	0.655172	0.634146	0.691176	0.03125	0.143106	0.313531	0.301775	0.189873	0.224652	0.239631
CHHDMR	13534	Bd1-1.CHH	Bd4	38402700	38402899	199	hyper	1	0.982759	0.9375	1	1	0.924242	0.973214	0.75	0.357143	1	0.636364	NA	0.5	0.487179	0.5	0	0	0.037037	0	0.0116279	0.00649351
CHHDMR	13632	Bd1-1.CHH	Bd4	40229800	40229999	199	hypo	0.724359	0.758333	0.914286	0.916667	0.923077	0.8125	0.926829	0.666667	0.659574	0.6	1	1	0.74359	0.756757	0.0229885	0.153846	0.360656	0.222222	0.135802	0.273171	0.219731
CHHDMR	13675	Bd1-1.CHH	Bd4	40967600	40967799	199	hypo	0.65	0.0666667	0.384615	0.333333	0.361702	0.117647	NA	0.333333	0.217391	0.424242	0.333333	0.489796	0.259259	NA	0.0241935	0.218182	0.465909	0.266667	0.376812	0.271429	NA
CHHDMR	13679	Bd1-1.CHH	Bd4	40983100	40983299	199	hypo	0.935829	0.977401	0.980392	0.9375	0.914894	0.97479	0.982857	0.539474	0.380952	0.3	0.6	0.454545	0.421053	0.785714	0.0288462	0.128415	0.295775	0.211009	0.361842	0.150943	0.0640496
CHHDMR	13685	Bd1-1.CHH	Bd4	41071600	41071799	199	hyper	1	0.925926	0.555556	0.857143	0.473684	0	0.526316	1	0.973333	0.588235	0.8	0.5	0	0.551724	0.35	0.00879121	0.0107527	0	0	0.0128205	0.0268817
CHHDMR	13753	Bd1-1.CHH	Bd4	42039800	42039999	199	hypo	0.714286	1	1	0.8	1	1	0.714286	0.285714	0.769231	0.5	1	0.333333	0	0.857143	0.0194805	0.490909	0.238806	0.0555556	0	0.0769231	0.111111
CHHDMR	13809	Bd1-1.CHH	Bd4	43198700	43198899	199	hyper	0.888889	1	NA	1	1	1	0.6	0.806452	0.375	0.666667	0.333333	0.5	0.543478	0.857143	0.450867	0.114286	0	0	0	0.0766773	0.0263158
CHHDMR	13857	Bd1-1.CHH	Bd4	44015400	44015599	199	hyper	0.662338	0.985	0.986667	0.973684	0.979592	0.925	0.982993	0.507937	0.529412	0.539683	0.310345	0.581818	0.492537	0.57672	0.282353	0.0245902	0.0136986	0	0.0111111	0.0135135	0.0101523
CHHDMR	13877	Bd1-1.CHH	Bd4	44370000	44370199	199	hyper	0.55	0.264706	0	0	0	0	0	0.439791	0.12381	0	0.0612245	0.0319149	0.0176991	0.0103093	0.297935	0.144547	0.00286533	0.00990099	0	0.0130208	0.00315457
CHHDMR	13880	Bd1-1.CHH	Bd4	44488900	44489099	199	hypo	1	1	0.857143	1	0.88	1	0.923077	1	1	1	1	1	1	1	0	0.227488	0.275362	0.241379	0.269625	0.104545	0.305785
CHHDMR	13966	Bd1-1.CHH	Bd4	46270000	46270199	199	hyper	1	NA	0	NA	0	0	0	0.666667	0	0	NA	0	0	0	0.470588	0	0	NA	0	0	0.0123457
CHHDMR	13980	Bd1-1.CHH	Bd4	46526200	46526399	199	hypo	0.0882353	0	0.466667	0	0	0	0	0.3	0	0.583333	NA	0	0.166667	0	0.0175439	0	0.54321	NA	0	0	0
CHHDMR	13991	Bd1-1.CHH	Bd4	46780300	46780499	199	hypo	0.0215054	0.556452	0.894737	NA	0.677966	0.627119	0.0212766	0	0.25	0.5	NA	0.285714	0.230769	0	0	0.251232	0.377551	NA	0.40566	0.335196	0
CHHDMR	13999	Bd1-1.CHH	Bd4	46929300	46929499	199	hypo	0.905172	0.983425	0.983806	0.962963	0.989286	0.947826	0.931204	0.265432	0.506887	0.525896	0.3125	0.527027	0.134228	0.433442	0.0251572	0.00393701	0.251429	0	0.0215517	0	0.0609756
CHHDMR	14007	Bd1-1.CHH	Bd4	47084600	47084799	199	hypo	0.933333	0.6875	0.95	0.333333	0.833333	0.8	0.6	0.809524	0.823529	0.774194	0.5	0.956522	0.92	0.941176	0.0384615	0.224138	0.383459	0	0.271429	0.0967742	0.10989
CHHDMR	14024	Bd1-1.CHH	Bd4	47346200	47346499	299	hypo	0.857143	0.761905	0.941176	1	1	1	0.904762	0.4	0.727273	0.65	0.607143	0.766667	0.72093	0.592308	0.0136986	0.33945	0.321053	0	0.0273973	0.0578512	0.251969
CHHDMR	14026	Bd1-1.CHH	Bd4	47372500	47372699	199	hypo	0	0	1	0.333333	0	0.75	0.588235	0.0434783	0	0.666667	0	NA	0.666667	0.391304	0.00892857	0	0.397059	0.133333	0	0.377778	0.381443
CHHDMR	14046	Bd1-1.CHH	Bd4	47910900	47911099	199	hyper	0.714286	0.833333	0	NA	NA	NA	0	0.619048	0.411765	0	NA	0	NA	0	0.267516	0.0116959	0	NA	0	0	0
CHHDMR	14088	Bd1-1.CHH	Bd5	635600	635799	199	hypo	0.978261	0.866337	0.983333	0.985	0.97093	0.907051	0.948454	0.453125	0.397436	0.807692	0.14433	0.716912	0.112426	0.146597	0.00537634	0.00235294	0.334459	0.0645161	0	0.00477327	0.232558
CHHDMR	14093	Bd1-1.CHH	Bd5	703200	703399	199	hyper	0.875	0.75	0.985612	0.978769	0.968153	0.888889	0.95974	0.666667	0.388889	0.397351	0.284264	0.35	0.333333	0.351064	0.91453	0	0.0242718	0.0212014	0.00835655	0	0.429945
CHHDMR	14106	Bd1-1.CHH	Bd5	1048900	1049199	299	hypo	0.980769	0.975904	0.964286	1	1	0.984127	0.977099	0.914676	0.966581	0.941423	0.854167	0.9375	0.949843	0.917081	0.0298507	0.0875371	0.350806	0.0965909	0.182657	0.155109	0.132969
CHHDMR	14139	Bd1-1.CHH	Bd5	1664500	1664699	199	hyper	1	0.965517	1	0.823529	NA	0.954545	0.95	0.666667	0.896552	1	0.857143	NA	0.864865	0.92	0.213115	0.00949367	0	0	NA	0.00995025	0.0301508
CHHDMR	14160	Bd1-1.CHH	Bd5	2008500	2008699	199	hypo	0.914894	0.926829	0.987654	0.954545	0.977099	0.958084	1	0.6875	0.538462	0.634615	0.857143	0.782609	0.567308	0.56338	0.0364078	0.118343	0.214953	0.104167	0.293194	0.13191	0.0443864
CHHDMR	14166	Bd1-1.CHH	Bd5	2097300	2097499	199	hypo	0.981818	0.930693	1	0.965217	0.967742	0.963855	0.983051	0.222222	0	1	0	0	0.625	0	0.0352201	0.0521886	0.244444	0.198915	0.218447	0.151575	0.0912548
CHHDMR	14173	Bd1-1.CHH	Bd5	2278900	2279099	199	hypo	0.931217	0.918719	0.973958	0.98895	0.968944	0.942974	0.94382	0.344538	0.707031	0.677165	0.670588	0.733696	0.737762	0.575	0.0269608	0.201156	0.337321	0.0876777	0.296245	0.25	0.202703
CHHDMR	14185	Bd1-1.CHH	Bd5	2498800	2498999	199	hyper	NA	NA	NA	NA	NA	NA	NA	1	1	0.333333	NA	NA	0	1	0.232704	0.189873	0	NA	NA	0.0819672	0.166667
CHHDMR	14192	Bd1-1.CHH	Bd5	2681000	2681199	199	hyper	0.965844	0.972274	0.993243	0.944954	0.996212	0.908708	0.96841	0.578947	0.573171	0.621622	0.761905	0.666667	0.547009	0.541176	0.330739	0.0202703	0	0.08	0.0857143	0.114754	0.0287356
CHHDMR	14212	Bd1-1.CHH	Bd5	3107600	3107799	199	hypo	0.333333	0	0.842105	0	NA	0.862745	0	0	0	0.5	0	NA	0.388889	0	0	0	0.305556	0	NA	0.190114	0
CHHDMR	14220	Bd1-1.CHH	Bd5	3236300	3236599	299	hypo	0.025974	0.0331126	0.678899	0.531532	0.0392157	0.788136	0	0	0.027027	0.252212	0.271186	0.025641	0.353982	0.0188679	0.002849	0.00398406	0.411546	0.269923	0.0963855	0.341951	0
CHHDMR	14224	Bd1-1.CHH	Bd5	3301000	3301199	199	hyper	1	1	1	NA	NA	0.619048	1	0.307692	0.230769	0.6	NA	1	0.2	0.833333	0.28	0.0229885	0.0181818	NA	0.703704	0	0.0769231
CHHDMR	14235	Bd1-1.CHH	Bd5	3734400	3734799	399	hypo	0.849315	0.921875	0.888889	1	0.92623	0.25	0.865248	0.125	0.264706	0.261905	0	0.296875	0.6	0.304348	0.0337079	0.241653	0.346509	0.401274	0.24199	0.111765	0.247069
CHHDMR	14248	Bd1-1.CHH	Bd5	3981600	3981799	199	hypo	0.965278	0.968182	0.969697	0.946565	0.98324	0.965517	0.99505	0.219355	0.617188	0.615385	0.679739	0.744186	0.278107	0.518519	0	0.0140845	0.647059	0	0.0215827	0.037037	0.0490196
CHHDMR	14257	Bd1-1.CHH	Bd5	4222400	4222599	199	hypo	0.833333	1	1	1	1	1	0.923077	1	NA	1	NA	NA	NA	NA	0.0406504	0.00704225	0.304348	0.0344828	0.244444	0.09	0.0685714
CHHDMR	14292	Bd1-1.CHH	Bd5	4746400	4746599	199	hyper	0.8	0	0.75	NA	1	1	1	0	0	0	NA	0	0	0	0.3125	0	0	NA	0	0	0
CHHDMR	14373	Bd1-1.CHH	Bd5	6206200	6206399	199	hypo	0.968966	0.978261	0.96817	0.980333	0.968858	0.981723	0.974716	0.653333	0.857778	0.781915	0.782143	0.8	0.808081	0.839344	0.0202703	0.173589	0.332569	0.0980881	0.120638	0.218927	0.226558
CHHDMR	14386	Bd1-1.CHH	Bd5	6365400	6365599	199	hyper	0.923077	0.971487	0.948718	0.9801	0.972509	0.92967	0.945993	0.625	0.725146	0.785124	0.688	0.728643	0.72973	0.673139	0.366667	0.014876	0.011976	0.0160643	0.0103093	0.0198556	0.004
CHHDMR	14405	Bd1-1.CHH	Bd5	6600200	6600399	199	hyper	0.958333	0	0	0.925373	0	1	0.86747	0.875	0	0	0	0	0.857143	0.8125	0.318801	0	0	0.244444	0	0.010846	0.1875
CHHDMR	14412	Bd1-1.CHH	Bd5	6667300	6667499	199	hypo	1	1	1	1	1	1	1	0.5	1	1	NA	NA	NA	0.666667	0	0.0149254	0.309524	0.0810811	0	0	0
CHHDMR	14413	Bd1-1.CHH	Bd5	6728000	6728299	299	hypo	0.964286	0.952381	1	1	1	0.978723	1	0.641791	0.583333	0.8	0.875	0.818182	0.586207	0.560606	0.0408484	0.035753	0.314574	0.277247	0.239884	0.231519	0.191679
CHHDMR	14420	Bd1-1.CHH	Bd5	6893100	6893299	199	hypo	0.578947	0.538462	0.428571	0.8	0.0769231	0.428571	0.483871	0.166667	0.230769	0.666667	0.5	0.375	0.421053	0.324324	0.00879765	0.0932203	0.388889	0.545455	0.010101	0.224299	0.00505051
CHHDMR	14429	Bd1-1.CHH	Bd5	7336200	7336499	299	hypo	0.92	0.985714	1	1	0.902439	1	0.967213	0.571429	0.583333	0.761905	0.780488	0.615385	0.666667	0.5	0.0204082	0.0676692	0.235294	0.0149254	0.0884354	0.166667	0.0819672
CHHDMR	14457	Bd1-1.CHH	Bd5	7937500	7937699	199	hypo	0.980392	0.952381	0.952381	1	1	NA	1	0.764706	0.744186	0.869565	0.964286	0.615385	NA	0.6	0.00502513	0.244713	0.369318	0.0603015	0.00540541	NA	0
CHHDMR	14458	Bd1-1.CHH	Bd5	7937900	7938099	199	hypo	1	0.888889	1	0.952381	1	NA	1	0.678571	0.757576	0.924242	0.5625	0.866667	0.8	0.64	0.0233918	0.16129	0.251429	0.0136519	0.0617284	0	0.00796813
CHHDMR	14464	Bd1-1.CHH	Bd5	8040800	8040999	199	hypo	0.571429	0.472727	0.407407	0	0.711111	0	0.586207	0.421875	0.385714	0.644737	0	0.518519	0.166667	0.21875	0.0333333	0.257764	0.239316	0	0.163265	0	0.109589
CHHDMR	14475	Bd1-1.CHH	Bd5	8287900	8288099	199	hypo	0.409091	0.631579	0.727273	0.666667	0.733333	0.25	1	0.1	0.5625	0.777778	0.25	0.428571	0.285714	1	0.0294118	0.346939	0.577778	0.428571	0.157895	0.129032	0.0408163
CHHDMR	14489	Bd1-1.CHH	Bd5	8470400	8470599	199	hypo	0.972222	0.973333	0.96875	1	0.987805	0.976744	0.980583	0.845238	0.8	0.892857	1	0.957143	0.675	0.671875	0.026455	0.00518135	0.352113	0	0.0394737	0	0.0941176
CHHDMR	14522	Bd1-1.CHH	Bd5	9042100	9042299	199	hypo	0.9375	0.9	1	1	1	0.5	0.923077	0.555556	0.428571	1	0.5	0.6	0	0.5	0.012931	0	0.565217	0	0	0	0.030303
CHHDMR	14542	Bd1-1.CHH	Bd5	9744400	9744599	199	hypo	0.75	0.980769	1	0.961538	1	1	0.966102	0.294118	0.516129	1	0.6	0.666667	0	0.789474	0.00393701	0.0731707	0.418605	0.397849	0	0	0.216495
CHHDMR	14564	Bd1-1.CHH	Bd5	10196600	10196799	199	hypo	0.929825	1	1	1	0.923077	0.949153	0.981818	0.28	0.6875	0.857143	1	0.25	0.6	0.758621	0.0103093	0.025974	0.425926	0.047619	0	0.142857	0.0752688
CHHDMR	14567	Bd1-1.CHH	Bd5	10307200	10307399	199	hyper	0.875	1	1	NA	0.666667	NA	NA	0	NA	NA	NA	NA	NA	NA	0.345865	0.223881	0	NA	0.333333	0.393939	0.222222
CHHDMR	14575	Bd1-1.CHH	Bd5	10397700	10397899	199	hypo	0.9375	0.72	0.9	0.142857	NA	0.692308	0.758621	0.291667	0.578947	1	0.333333	NA	0.4	0.545455	0.0333333	0.104816	0.246753	0.0932203	NA	0.170732	0.0912863
CHHDMR	14605	Bd1-1.CHH	Bd5	10705600	10705799	199	hypo	0.5	0.972603	0.935484	1	1	1	0.96	1	0.571429	0.625	1	1	0.88	1	0	0.200192	0.327869	0.195228	0.0892857	0.252544	0.175305
CHHDMR	14639	Bd1-1.CHH	Bd5	11225800	11225999	199	hypo	0.666667	0.809524	0.891892	NA	0	NA	0.714286	NA	0.441176	0.355932	NA	NA	NA	0.214286	0	0.140644	0.220779	NA	0.133333	0.142857	0.190476
CHHDMR	14660	Bd1-1.CHH	Bd5	11533500	11533699	199	hypo	0.947368	0.733333	1	NA	1	1	1	0.78125	0.833333	0.846154	NA	0	1	0.692308	0.00826446	0	0.298969	0	0	0.204082	0.0357143
CHHDMR	14664	Bd1-1.CHH	Bd5	11584900	11585099	199	hyper	0.937824	0.875	0.970588	0.974359	0.96	0.937198	0.930556	0.515464	0.647059	0.263158	0	0.454545	0.658228	0.631579	0.304511	0.236364	0.0208333	0	0.0396825	0.358586	0.2
CHHDMR	14671	Bd1-1.CHH	Bd5	11727500	11727699	199	hypo	0	0	0	0	0	0	0	0.0169492	0.125	0.194444	0.25	0	0	0	0.00746269	0.288136	0.281437	0.103448	0	0	0
CHHDMR	14716	Bd1-1.CHH	Bd5	12559800	12559999	199	hypo	0.973545	0.732673	0.859504	0.679487	0.79375	0.969432	0.979675	0.479167	0.412698	0.673684	0.520325	0.625	0.626582	0.614458	0.00743494	0.248241	0.247803	0.312916	0.273339	0.0301568	0.0138313
CHHDMR	14741	Bd1-1.CHH	Bd5	13017300	13017499	199	hypo	0.9375	0.816406	0.855556	1	1	0.875	0.866667	0.52381	0.422018	0.432692	0.826087	0.964286	0.655963	0.26087	0.015873	0.281407	0.331967	0.571429	0.222222	0.501634	0.12
CHHDMR	14781	Bd1-1.CHH	Bd5	13724000	13724299	299	hypo	0.973214	0.972973	1	1	1	0.989247	0.954286	0.778378	0.79868	0.839286	0.889706	0.788018	0.855799	0.846416	0.0383795	0.15534	0.503356	0.070922	0.137324	0.0737052	0.183432
CHHDMR	14784	Bd1-1.CHH	Bd5	13766400	13766599	199	hypo	0.976048	0.903448	0.969388	1	0.878049	0.970833	0.92	0.302326	0.279412	0.444444	0.666667	0.555556	0.414286	0.489583	0	0.0424403	0.209302	0.19403	0.0142857	0.00777202	0.010772
CHHDMR	14794	Bd1-1.CHH	Bd5	13889100	13889299	199	hypo	0.977444	0.936709	0.870968	1	1	0.939394	0.965517	0.558824	0.67033	0.592593	0.942857	0.714286	0.690476	0.641026	0.0121212	0.015625	0.709877	0.0622222	0	0.123967	0.0622568
CHHDMR	14834	Bd1-1.CHH	Bd5	14465200	14465399	199	hypo	0	0	0.878788	0.857143	0	0.886957	0.898305	0.0526316	0	0.513158	0.47561	0.0150376	0.534161	0.337349	0	0.0442478	0.243176	0.0816733	0.0903614	0.136986	0.118644
CHHDMR	14855	Bd1-1.CHH	Bd5	14753700	14753899	199	hypo	0.956044	0.979381	1	1	0.975806	0.979798	0.959016	0.785714	0.844156	0.903226	0.763158	0.804348	0.643836	0.638554	0.0392157	0.0566038	0.298611	0.244444	0.0447761	0.109677	0.0509259
CHHDMR	14864	Bd1-1.CHH	Bd5	14923900	14924099	199	hypo	1	0.522184	0.583893	0.671717	0.792	0.660377	0.544622	0.666667	0.336538	0.414062	0.52381	0.555556	0.446237	0.380556	0.00487805	0.335227	0.439807	0.412736	0.369656	0.334259	0.342178
CHHDMR	14902	Bd1-1.CHH	Bd5	15464200	15464399	199	hypo	0.6625	0.93617	0.967391	0.946667	0.955782	0.956044	0.956044	0.567568	0.440476	0.535714	0.541667	0.583026	0.529032	0.480519	0.015	0.151442	0.208955	0.239888	0.198473	0.252632	0.135135
CHHDMR	14915	Bd1-1.CHH	Bd5	15659900	15660099	199	hyper	0.910798	0.959693	0.954545	0.97832	0.96748	0.973025	0.953074	0.726415	0.666667	0.688312	0.636364	0.603053	0.577703	0.70679	0.30814	0.0255754	0.0070922	0	0	0.0591837	0.303109
CHHDMR	14923	Bd1-1.CHH	Bd5	15751900	15752099	199	hypo	0.787234	0.901176	0.956693	0.411765	0.945392	0.873449	0.918977	0.363636	0.657895	0.719298	1	0.776316	0.613861	0.623656	0.0133333	0.435825	0.525672	0.4	0.469062	0.431542	0.290411
CHHDMR	14936	Bd1-1.CHH	Bd5	16012500	16012699	199	hypo	0.968208	0.971888	0.994681	0.940887	0.962733	0.95	0.962712	0.563265	0.454545	0.696078	0.510067	0.544601	0.409722	0.477707	0.0430464	0.0250965	0.273109	0.100877	0.238276	0.158537	0.11204
CHHDMR	14941	Bd1-1.CHH	Bd5	16126300	16126499	199	hypo	0.953368	0.681818	0.565789	0.969231	0.502618	0.740741	0.985348	0.614458	0.631579	0.486842	0.607843	0.491018	0.711111	0.661417	0.012987	0.435897	0.290323	0.151515	0.409574	0.372222	0.00722022
CHHDMR	14974	Bd1-1.CHH	Bd5	16592500	16592699	199	hyper	0.958801	0.981873	0.981818	1	0.991549	0.904762	1	0.75	0.764706	0.745098	0.666667	1	0.5	0.7	0.246032	0.0117647	0.0127389	0	0	0	0.108696
CHHDMR	14977	Bd1-1.CHH	Bd5	16621000	16621199	199	hypo	0.923077	1	0.875	NA	1	NA	1	0.521739	0.857143	0.833333	1	1	0.8	0.842105	0.0423729	0.0267857	0.255814	0	0.0555556	0	0.0666667
CHHDMR	14983	Bd1-1.CHH	Bd5	16905900	16906099	199	hypo	0.99095	0.979434	0.989324	0.97832	0.972973	0.988701	0.981699	0.707317	0.815341	0.884298	0.777778	0.873181	0.704989	0.815287	0	0.228013	0.624724	0	0	0.417333	0.785615
CHHDMR	14986	Bd1-1.CHH	Bd5	16959900	16960099	199	hypo	0.913194	0.946565	1	1	0.975248	0.986726	0.973094	0.519841	0.772021	0.809524	0.840909	0.824675	0.685279	0.694444	0.010582	0.048913	0.457944	0	0.00438596	0.146341	0.0447761
CHHDMR	14996	Bd1-1.CHH	Bd5	17086900	17087099	199	hyper	0.1875	0	0	0	0	0	0	0.392857	NA	0	0	0	0	0.6	0.222222	0	0	0	0	0	0.01
CHHDMR	15012	Bd1-1.CHH	Bd5	17283900	17284099	199	hypo	0.909091	1	1	0	1	1	1	0.973684	0.966102	1	0.969697	0.931034	0.944444	0.933333	0.0246479	0.0526316	0.247312	0.0833333	0	0.0393701	0.0227273
CHHDMR	15025	Bd1-1.CHH	Bd5	17573700	17573899	199	hypo	0.777778	0.857143	1	1	1	1	0.75	0.25	0.5	0.333333	0.2	0	0	0.5	0.025	0.410256	0.592593	0.444444	0.181818	0.08	0.586207
CHHDMR	15036	Bd1-1.CHH	Bd5	17791700	17791899	199	hypo	0.921053	0.78125	0.666667	1	0.4	0.916667	0.896552	0.85	0.838235	0.777778	1	0.285714	0.5	0.807692	0	0.0246305	0.24	0.105263	0.0952381	0.0121951	0.101695
CHHDMR	15037	Bd1-1.CHH	Bd5	17803500	17803699	199	hypo	1	1	1	1	NA	1	1	0.384615	0.571429	1	1	0.785714	0.588235	0.875	0.025641	0.0263158	0.375	0.65	0.0918367	0.135135	0.617284
CHHDMR	15061	Bd1-1.CHH	Bd5	18259800	18259999	199	hyper	0.993056	0.876147	0.915493	0.844828	0.830846	0.960352	0.917563	0.716049	0.53211	0.645161	0.833333	0.60177	0.654412	0.664384	0.363636	0	0.0210526	0.142857	0.0185185	0	0.292035
CHHDMR	15100	Bd1-1.CHH	Bd5	19126200	19126399	199	hypo	0.95	0.934211	0.986301	0.9375	0.905405	0.966387	0.970149	0.460674	0.642857	0.707692	0.852941	0.705882	0.754098	0.64557	0.0243902	0.0613208	0.295	0.0697674	0.0601093	0.0212014	0.0350877
CHHDMR	15152	Bd1-1.CHH	Bd5	20021900	20022099	199	hypo	0.947368	0.913043	1	0.928571	0.959184	1	0.978261	0.0416667	0.0833333	0.269231	0.259259	0.115385	0.0810811	0.114286	0.0263158	0.0722892	0.26087	0.323944	0.122137	0.142045	0.0921409
CHHDMR	15166	Bd1-1.CHH	Bd5	20277500	20277699	199	hypo	0.0410959	0.222222	0.25	0.375	0.492063	0.339286	0.647059	0.0410959	0.12069	0.186441	0.208333	0.456897	0.259542	0.415842	0.00679117	0.109804	0.300481	0.150997	0.211137	0.196117	0.234908
CHHDMR	15173	Bd1-1.CHH	Bd5	20405300	20405499	199	hypo	0.963542	0.251572	0.365854	0.205357	0.147541	0.19774	0.20283	0.546763	0.191489	0.328767	0.126761	0.138889	0.142857	0.147651	0.0264901	0.248521	0.34507	0.271028	0.0961538	0.224299	0.155894
CHHDMR	15201	Bd1-1.CHH	Bd5	20883700	20883899	199	hyper	0.0508475	0.00355872	0.00966184	0.011236	0	0	0.00246305	0.0576923	0	0	0	0.0183486	0.0153846	0.0124224	0.230769	0.00722022	0	0	0.0113636	0	0.016129
CHHDMR	15203	Bd1-1.CHH	Bd5	20910700	20910999	299	hypo	1	0.844444	0.833333	NA	1	0.888889	1	0.740741	0.934783	0.777778	1	1	0.75	0.846154	0.0122951	0.21663	0.423913	0.526316	0.771429	0.289474	0.13369
CHHDMR	15230	Bd1-1.CHH	Bd5	21309300	21309499	199	hypo	0.75	0.93662	0.986486	NA	0.859155	0.963415	0.971963	0	0.93617	1	NA	0.827586	0.823529	0.75	0	0.39413	0.377261	0.448276	0.40192	0.504282	0.436554
CHHDMR	15238	Bd1-1.CHH	Bd5	21417200	21417399	199	hypo	0	0	0.629032	0	0	0.0133333	0	0.0428571	0.0165289	0.609756	0.0106383	0.0151515	0.00990099	0.0175439	0.0110803	0.003861	0.230366	0.00555556	0.0247934	0.0216216	0.00645161
CHHDMR	15241	Bd1-1.CHH	Bd5	21450900	21451099	199	hypo	0.307692	0.259259	0.25	NA	0.125	0.291667	0.157895	0.0625	0.0833333	0.230769	NA	0	0.075	0	0.00930233	0.0418605	0.219298	NA	0	0.0833333	0.00892857
CHHDMR	15242	Bd1-1.CHH	Bd5	21460300	21460499	199	hypo	0.5	NA	NA	NA	NA	NA	NA	0.607143	0.910714	0.870968	0.90625	1	0.86	0.888889	0.0220994	0.0353982	0.239669	0.0491803	0.13253	0.219626	0.0755814
CHHDMR	15257	Bd1-1.CHH	Bd5	21730900	21731099	199	hypo	0.923077	1	1	1	1	1	0.833333	0.866667	0.8125	0.8	0.833333	1	0.884615	1	0.0210526	0.153846	0.403846	0.5	0	0.152542	0.1
CHHDMR	15269	Bd1-1.CHH	Bd5	21954800	21954999	199	hypo	0.333333	NA	1	NA	1	NA	NA	0	0.4	0	0	0.25	1	0.6	0.00961538	0	0.234043	0	0	0.0857143	0.0769231
CHHDMR	15287	Bd1-1.CHH	Bd5	22213700	22213899	199	hyper	0.980952	0.924731	0.927273	0.979592	0.972826	0.962617	0.944444	0.883333	0.795918	0.666667	0.931818	0.911111	0.862069	0.894737	0.53125	0.0117647	0.015873	0.0217391	0.0186047	0.394495	0.31068
CHHDMR	15307	Bd1-1.CHH	Bd5	22674900	22675099	199	hypo	0.73913	0.923077	1	0.5	0.923077	0.823529	0.928571	0.125	NA	0	NA	0.333333	NA	0.666667	0.0305344	0.472973	0.236842	0.4	0.258621	0.42623	0.25
CHHDMR	15308	Bd1-1.CHH	Bd5	22681200	22681499	299	hypo	0.9	0.933333	1	1	1	0.914894	1	0.625	0.6	0.909091	1	0.857143	0.730769	0.965517	0	0.0860215	0.246575	0	0.0413223	0.0127389	0.0288066
CHHDMR	15312	Bd1-1.CHH	Bd5	22736700	22736899	199	hypo	1	1	1	1	0.892857	1	0.967742	0.714286	0.688889	1	0.647059	0.74359	0.869565	0.657895	0	0.129371	0.727273	0.03125	0.00854701	0	0.077381
CHHDMR	15354	Bd1-1.CHH	Bd5	23797200	23797399	199	hyper	0.666667	0.991837	0.969697	0.980315	0.982456	0.97619	0.6	0.666667	0.868852	0.826087	0.981308	0.824742	0.863248	0	0.428571	0.010118	0	0.01	0.00351494	0.00867679	0
CHHDMR	15356	Bd1-1.CHH	Bd5	23855100	23855299	199	hypo	0.947368	1	1	NA	1	0.666667	1	0.5	NA	NA	NA	1	0	NA	0.0309278	0.0434783	0.409091	NA	0	0	0.181818
CHHDMR	15358	Bd1-1.CHH	Bd5	23881100	23881299	199	hyper	1	1	1	NA	NA	1	NA	0.285714	0	0	NA	NA	0	0	0.307692	0.1	0	0	0	0	0
CHHDMR	15377	Bd1-1.CHH	Bd5	24218000	24218199	199	hyper	0.984746	0.980198	0.989362	0.984211	0.960988	0.986486	0.987377	0.949541	0.95	0.877193	0.971429	0.903571	0.904959	0.908497	0.441088	0.240964	0	0	0.00543478	0.187879	0.246711
CHHDMR	15418	Bd1-1.CHH	Bd5	25018800	25018999	199	hypo	1	0.84	1	1	0.857143	1	1	0.583333	0.357143	0.733333	NA	NA	0	0.71875	0	0.0402685	0.358696	0	0.347826	0.103774	0.218254
CHHDMR	15428	Bd1-1.CHH	Bd5	25236400	25236599	199	hypo	0.541667	0.71831	0.631579	0	0.818182	0.125	0.333333	0	0.413793	0.571429	1	0.272727	0.2	0	0	0.16875	0.347826	0	0.166667	0.04	0
CHHDMR	15441	Bd1-1.CHH	Bd5	25434700	25434899	199	hypo	0.981667	0.966226	0.984	0.98263	0.983982	0.962323	0.979771	0.641873	0.673629	0.755396	0.804167	0.715953	0.708029	0.6983	0.00678733	0.121359	0.261261	0.0606061	0.0133333	0.0911271	0.138414
CHHDMR	15452	Bd1-1.CHH	Bd5	25606900	25607099	199	hypo	0.142857	0.766667	0.885714	1	0.75	0.512195	0.807018	0.170732	0.275862	0.285714	0.444444	0.285714	0.196429	0.204545	0.00740741	0.304878	0.25523	0.57377	0.305085	0.236686	0.442211
CHHDMR	15484	Bd1-1.CHH	Bd5	26602900	26603099	199	hypo	0.790698	0.924051	0.972789	0.991525	1	0.92233	0.961165	0.6	0.669355	0.837607	0.826923	0.764706	0.751634	0.760736	0.0232558	0.0474777	0.287736	0.222222	0.08	0.106965	0.27234
CHHDMR	15490	Bd1-1.CHH	Bd5	26756000	26756199	199	hypo	0.714286	0.384615	1	1	1	1	1	0	0	0.111111	0	0	0	0	0.0131579	0.0588235	0.298701	0	0	0.0857143	0.0436893
CHHDMR	15491	Bd1-1.CHH	Bd5	26764700	26764899	199	hypo	0.866667	0.944444	0.595238	0.928571	0.75	0.3	0.594595	0.25	NA	0.384615	NA	0.142857	0.30303	0.235294	0.0120482	0	0.247619	0.0217391	0.119403	0.619048	0.107143
CHHDMR	15519	Bd1-1.CHH	Bd5	27361900	27362099	199	hyper	0.956274	0.0108696	0.0103093	0.0232558	0.00369004	0.00362319	0.003861	0.829439	0.0192308	0	0.0273973	0.016129	0.00985222	0	0.477729	0.00675676	0	0.00574713	0.0060241	0.00274725	0
CHHDMR	15524	Bd1-1.CHH	Bd5	27541900	27542099	199	hypo	NA	0.941176	1	1	0.842105	1	0.928571	NA	NA	NA	NA	NA	NA	NA	0.00943396	0.128968	0.215094	0.291667	0.290557	0.291925	0.184615
CHHDMR	15525	Bd1-1.CHH	Bd5	27605400	27605599	199	hypo	0.944444	0.902778	0.978261	0.970588	0.95	0.986667	0.945455	0.866667	0.769231	1	0.836364	0.830189	0.868852	0.917647	0.021978	0.0973783	0.324468	0.131687	0.172414	0.243077	0.197339
CHHDMR	15533	Bd1-1.CHH	Bd5	27721000	27721199	199	hypo	NA	NA	NA	NA	NA	NA	NA	1	1	1	NA	NA	NA	NA	0.0218579	0.0111111	0.233645	NA	0.25	NA	0.027027
CHHDMR	15541	Bd1-1.CHH	Bd5	27830800	27831099	299	hypo	0.940594	NA	0.991304	NA	NA	1	NA	0.834711	NA	0.863636	NA	NA	0.897059	NA	0.0116279	NA	0.240406	NA	NA	0.0108192	NA
CHHDMR	15553	Bd1-1.CHH	Bd5	28168700	28168899	199	hypo	0.176471	0.72	0.644737	0.5	1	0.709677	0.565217	0.5	0	0.638298	0.5	0.8	0.626866	0.857143	0	0.03125	0.362416	0.333333	0	0.448087	0
CHHDMR	15557	Bd1-1.CHH	Bd5	28208800	28208999	199	hypo	0.9	0.666667	1	1	0.666667	0.977011	1	0	0.5	1	0.5	1	0.686275	0.333333	0	0.0697674	0.522727	0	0	0.312715	0
CHHDMR	15570	Bd1-1.CHH	scaffold_119	0	199	199	hyper	0.962963	0	0	NA	0.555556	0.625	0.944444	0.626667	0	0	0	0.565217	0.833333	0.512195	0.289744	0	0	0	0.0662252	0.221311	0.0267857
CHHDMR	15576	Bd1-1.CHH	scaffold_13	7700	7899	199	hypo	0.75	NA	1	1	1	NA	NA	0.5	NA	1	1	NA	NA	NA	0	NA	0.32	0.416667	0	NA	NA
CHHDMR	15593	Bd1-1.CHH	scaffold_22	100	299	199	hyper	0.666667	NA	1	NA	0	NA	1	0.2	0.454545	0.3	NA	0.411765	NA	0.444444	0.275862	0.0183486	0	NA	0.0304878	NA	0
CHHDMR	15601	Bd1-1.CHH	scaffold_54	700	899	199	hypo	0.333333	0.206897	0.571429	0	0.8	0.272727	0.24	0.142857	0.105263	0.375	0	0.166667	0	0.172414	0.012987	0.00934579	0.392857	0.0909091	0	0.03125	0.186813
CHHDMR	16	Bd21-3.CHH	Bd1	506000	506199	199	hypo	0.663717	0.111111	0.357143	0.607143	0	0.475	0.375	0.592105	0.117647	0.47619	0.3125	0.103448	0.16	0	0.0512249	0.0296053	0.227941	0.00884956	0.0184049	0.0462428	0.0196078
CHHDMR	31	Bd21-3.CHH	Bd1	1093500	1093699	199	hypo	NA	0.952381	1	NA	1	1	0.964912	NA	0.142857	0.567568	NA	0.545455	0.45	0.5	NA	0.0215517	0.429054	NA	0.0779817	0.18932	0.126471
CHHDMR	33	Bd21-3.CHH	Bd1	1116700	1116899	199	hypo	NA	0	0	NA	NA	NA	1	NA	0	0.714286	NA	1	NA	0.777778	NA	0.0120482	0.301205	NA	0.09375	0	0.217822
CHHDMR	69	Bd21-3.CHH	Bd1	2188400	2188599	199	hyper	1	1	1	1	0.333333	1	0.8	0.944444	0.875	1	1	NA	0.846154	1	0.186992	0.45	0	0.333333	0.0833333	0.255319	0.0670732
CHHDMR	135	Bd21-3.CHH	Bd1	4041400	4041599	199	hyper	0.00687285	0.972318	0.964286	0.946602	0.97433	0.919225	0.974332	0	0.718919	0.75	0.80203	0.843636	0.715736	0.819495	0.015873	0.273504	0	0.0125786	0.0255474	0.20303	0.146572
CHHDMR	139	Bd21-3.CHH	Bd1	4080700	4080899	199	hypo	0.92	0.75	1	1	0.571429	1	0.769231	0.0909091	0	0	0	0.333333	0	0	0.152672	0.0225564	0.262295	0.214286	0.278689	0.18	0.179104
CHHDMR	144	Bd21-3.CHH	Bd1	4161300	4161499	199	hypo	0.791667	0.714286	0.857143	1	1	0.538462	0.928571	0.25	0	0.5	1	0	0	0.5	0	0.0277778	0.526316	0.21875	0	0.0449438	0.0849057
CHHDMR	196	Bd21-3.CHH	Bd1	5409500	5409699	199	hypo	0.972973	0.957143	0.816667	NA	0.969231	0.98	1	0.0793651	0.0263158	0.179487	NA	0.333333	0.0204082	0	0.0222222	0.00653595	0.307692	NA	0	0.00925926	0
CHHDMR	197	Bd21-3.CHH	Bd1	5415000	5415299	299	hypo	0.72619	0.975	0.797753	1	0.648649	0.791667	0.885246	0.494737	0.536232	0.536082	0.875	0.688889	0.59542	0.752688	0.171429	0.0290909	0.276873	0.00625	0.320513	0.332394	0.116
CHHDMR	218	Bd21-3.CHH	Bd1	5917100	5917299	199	hypo	0.841121	0.944444	1	0.904762	0.892045	0.891429	0.894231	0.5	0.578571	0.882353	0.5	0.564103	0.505814	0.487805	0.032	0.0174419	0.708333	0	0.0105263	0.0143541	0
CHHDMR	263	Bd21-3.CHH	Bd1	6866300	6866499	199	hyper	0.821429	1	1	1	1	0.85	1	0.47541	0.78125	0.757576	0.809524	0.777778	0.577778	0.490566	0.136364	0.300448	0.0149254	0.318182	0.181818	0.403922	0.0986842
CHHDMR	271	Bd21-3.CHH	Bd1	7031900	7032099	199	hyper	0.53125	0.706349	0.990826	0.985149	0.55102	0.51269	0.485632	0.563636	0.574924	0.847682	0.753927	0.58209	0.560886	0.562232	0.0483092	0.263605	0.0237691	0.124842	0.355178	0.302217	0.265933
CHHDMR	329	Bd21-3.CHH	Bd1	8417400	8417599	199	hypo	0.887446	0.9125	1	0.941176	0.971429	0.948276	0.946023	0.618056	0.766667	0.758621	0.869565	0.829268	0.811475	0.811404	0.0101523	0	0.542857	0	0	0	0.201183
CHHDMR	346	Bd21-3.CHH	Bd1	8948500	8948699	199	hypo	0	0	0.928571	NA	0	0	0.939394	0.016	0.0185185	0.766667	0	0	0.142857	0.66	0.0178571	0	0.290076	0	0.0444444	0.0178571	0.0895522
CHHDMR	352	Bd21-3.CHH	Bd1	9052600	9052799	199	hyper	0.965517	0.818182	0.9	1	1	1	0.952381	0.1	0.0454545	0.0769231	0	0	0	0.277778	0.195513	0.23301	0.0266667	0	0.15	0.457143	0.358974
CHHDMR	358	Bd21-3.CHH	Bd1	9159100	9159299	199	hypo	0.0232558	0.025641	0.942029	0.5	0	0.222222	0.137931	0	0	0.413793	0	0	0	0	0	0.0111111	0.398734	0	0	0	0.00675676
CHHDMR	453	Bd21-3.CHH	Bd1	11359800	11359999	199	hyper	0.984055	0.986364	0.995215	0.982587	0.997817	0.983402	0.987788	0.754875	0.81893	0.805369	0.878327	0.89726	0.873016	0.844156	0.360987	0.450106	0	0.0338983	0.0151515	0.524793	0.608889
CHHDMR	468	Bd21-3.CHH	Bd1	11643700	11643899	199	hyper	0.376344	0.514706	0	0.714286	0	0.526316	0.373333	0.184783	0.35443	0.037037	0.214286	0	0.380282	0.207547	0.164835	0.213043	0.0140845	0.114286	0	0.101523	0.0703704
CHHDMR	471	Bd21-3.CHH	Bd1	11735300	11735499	199	hyper	0.97546	0.981308	0.990244	0.989744	0.989407	0.973094	0.977816	0.641667	0.788889	0.776119	0.707071	0.629371	0.696429	0.698225	0.0185185	0.436441	0	0	0	0.248756	0.304348
CHHDMR	538	Bd21-3.CHH	Bd1	13115100	13115299	199	hyper	0	0	0.0416667	0	0	0.04	0.0322581	0.0705882	0.673469	0.047619	0.875	0	0.494737	0.216667	0.0295567	0.344444	0.0148515	0.424342	0.00699301	0.440506	0.12848
CHHDMR	552	Bd21-3.CHH	Bd1	13458400	13458599	199	hypo	NA	0.5625	0.714286	0.589041	0.561644	0.618557	0.567901	NA	0.222222	0.526316	0.147541	0.117647	0.142857	0.214286	NA	0.0320856	0.337349	0.20197	0.0560345	0.0445104	0.0736434
CHHDMR	571	Bd21-3.CHH	Bd1	14011700	14011899	199	hyper	0.952727	0.926966	0.974026	0.909774	0.969762	0.967742	0.904863	0.543307	0.567686	0.466667	0.767442	0.75	0.637427	0.617978	0.290909	0.204819	0.0207254	0.111111	0.0357143	0.0860927	0.282158
CHHDMR	580	Bd21-3.CHH	Bd1	14221200	14221399	199	hypo	0	0	0.352941	0	0	0.0294118	0.0277778	0.0277778	0	0.172414	0	0	0.107143	0.387097	0.00719424	0	0.25	0.0972222	0	0.11465	0.254958
CHHDMR	584	Bd21-3.CHH	Bd1	14310700	14310899	199	hypo	0.942623	0.827957	0.87931	0.78022	0.8	0.849315	0.866071	0.282051	0.428571	0.333333	0.521739	0.6	0.142857	0.488372	0.0154525	0.017094	0.28934	0.094697	0.0855263	0.0186047	0.0241228
CHHDMR	592	Bd21-3.CHH	Bd1	14402900	14403099	199	hyper	NA	NA	1	1	NA	1	1	0.72	0.75	0.777778	1	NA	1	0.636364	0.0173913	0.411765	0	0	NA	0.0430108	0
CHHDMR	611	Bd21-3.CHH	Bd1	14833900	14834099	199	hyper	0	0.36	0.9	0	0	0.589744	0.424658	0	0.37931	0.5	0	0	0.217391	0.466667	0.0194805	0.403846	0	0.291667	0	0.526882	0.358423
CHHDMR	627	Bd21-3.CHH	Bd1	15178100	15178299	199	hyper	0.744186	0.533333	0.333333	0.857143	1	0.181818	0.142857	0	0.352941	0	0.142857	0.0714286	0	0.0217391	0.0576923	0.315789	0	0.25	0.153846	0.222222	0.0555556
CHHDMR	632	Bd21-3.CHH	Bd1	15278800	15278999	199	hyper	0.977671	0.963252	0.987705	0.979914	0.979782	0.983206	0.982074	0.654229	0.751503	0.798387	0.793566	0.83237	0.793785	0.783599	0.0658915	0.23475	0.013986	0.014881	0.0616883	0.107955	0.168142
CHHDMR	738	Bd21-3.CHH	Bd1	17972600	17972799	199	hypo	1	0.875	0.942857	1	0.959596	0.932203	0.954198	0.6	0.2	0.5	0.75	0.766667	0.555556	0.658537	0.130682	0.0246914	0.385714	0.115385	0.203704	0.13245	0.161435
CHHDMR	824	Bd21-3.CHH	Bd1	19753200	19753399	199	hypo	0.0052356	0.00869565	0.71875	0.76087	0.682927	0.0405405	0.25	0.0150376	0	0.357143	0.425	0.219178	0	0.0588235	0	0.00546448	0.293478	0.176471	0.266304	0	0.0280899
CHHDMR	850	Bd21-3.CHH	Bd1	20601600	20601799	199	hypo	0.899083	0	0.818182	0.0243902	0.0422535	0	0.025641	0.450867	0.00485437	0.575758	0.0566038	0.12987	0.0151515	0.0396825	0.252788	0.00788955	0.306667	0.19403	0.155405	0.0138889	0.0567823
CHHDMR	874	Bd21-3.CHH	Bd1	21096500	21096699	199	hypo	0.018018	0.0379747	0.492754	0	0.347222	0.231405	0.427136	0.00952381	0.0394737	0.397351	0	0.230769	0.25	0.4	0.00355872	0.0108108	0.543689	0	0.360544	0.469314	0.387037
CHHDMR	924	Bd21-3.CHH	Bd1	22133400	22133599	199	hyper	0.444444	0.5	0.428571	NA	NA	NA	NA	0	0.5	0	NA	NA	NA	NA	0	0.333333	0	NA	NA	NA	NA
CHHDMR	927	Bd21-3.CHH	Bd1	22144100	22144299	199	hyper	0.919214	0.967782	0.971264	0.805556	0.975155	0.989744	0.95709	0.763496	0.823448	0.83871	0.864372	0.914005	0.913738	0.852423	0.00759494	0.305122	0	0.0446927	0.0769231	0.626459	0.484375
CHHDMR	930	Bd21-3.CHH	Bd1	22191000	22191199	199	hypo	1	1	1	NA	NA	NA	NA	0.5625	0.5	0.555556	NA	NA	NA	1	0	0	0.375	NA	NA	1	0.133333
CHHDMR	934	Bd21-3.CHH	Bd1	22336700	22336899	199	hypo	0.890411	1	0.962963	0.793103	0.75	0.846154	1	0.375	0.666667	0.625	0.615385	0.75	0.833333	0.666667	0	0	0.293651	0.119565	0	0.268293	0.0288462
CHHDMR	941	Bd21-3.CHH	Bd1	22430400	22430599	199	hypo	1	1	1	1	0.909091	NA	0.933333	0.952381	0.967742	0.95	1	0.857143	0.666667	0.857143	0.0357143	0.0149254	0.413043	0.153846	0.0333333	0	0.030303
CHHDMR	956	Bd21-3.CHH	Bd1	22650200	22650399	199	hypo	0.846154	0.709677	0.88	0.758621	0.666667	0.833333	0.782609	0.558442	0.666667	0.928571	0.882353	0.727273	0.744681	0.727273	0.0865385	0.0344828	0.309942	0.184211	0.127907	0.249084	0.103261
CHHDMR	970	Bd21-3.CHH	Bd1	23042900	23043099	199	hypo	0.363636	0.461538	1	1	0.333333	1	0.764706	0.193548	0.526316	0.909091	0.5	0	NA	0.545455	0.0862944	0.0116279	0.359375	0.478261	0	0.142857	0.151079
CHHDMR	998	Bd21-3.CHH	Bd1	23532000	23532199	199	hypo	0.916667	1	0.75	1	1	1	0.870968	0.766667	0.875	0.833333	0.333333	1	0.888889	0.761905	0.0304054	0.0119048	0.363636	0.12	0.025	0.0483871	0.0555556
CHHDMR	1030	Bd21-3.CHH	Bd1	24156300	24156499	199	hypo	0.18	0	0.0851064	0.571429	0	0.179487	0.189873	0.111111	0	0.111111	0.428571	0	0	0.0425532	0.0851064	0	0.240506	0.432099	0	0.0128205	0.0444444
CHHDMR	1047	Bd21-3.CHH	Bd1	24432200	24432399	199	hypo	NA	0.964286	1	NA	0.857143	0.953488	1	NA	0.474576	0.806452	NA	NA	0.5	0.933333	NA	0.0120482	0.5	NA	0	0.333333	0.636364
CHHDMR	1049	Bd21-3.CHH	Bd1	24460500	24460699	199	hyper	0.888889	1	0.909091	NA	NA	NA	1	1	NA	1	NA	NA	1	1	0.0252101	0.301887	0.0144928	NA	NA	0	0.875
CHHDMR	1091	Bd21-3.CHH	Bd1	25413200	25413399	199	hypo	0.884422	0.85	0.953488	1	0.843137	0.911765	0.965909	0.0769231	0.181818	0.625	1	0.37931	0.26087	0.0588235	0.0680851	0.0134228	0.482143	0.352941	0.0596026	0.0581395	0.0238095
CHHDMR	1113	Bd21-3.CHH	Bd1	25964900	25965099	199	hyper	NA	1	1	0	1	0.833333	1	0.780488	0.839506	0.785714	0	0.888889	0.666667	0.40678	0.017094	0.310811	0	0.0142857	0.015748	0	0.004329
CHHDMR	1115	Bd21-3.CHH	Bd1	26065200	26065399	199	hypo	0.9	0.984772	0.985507	0.977444	0.973684	0.968	0.987234	0.333333	0.625571	0.658537	0.79798	0.844898	0.753165	0.755474	0.0188679	0.0125523	0.327586	0.235294	0.0118343	0.369231	0.0283019
CHHDMR	1155	Bd21-3.CHH	Bd1	27081200	27081399	199	hypo	0.87234	0.92	0.5	1	1	0.9375	1	0.697674	0.380952	0.666667	0.5	0.294118	0.72	0.625	0.0645161	0	0.439024	0.225352	0.22314	0.285714	0.166667
CHHDMR	1187	Bd21-3.CHH	Bd1	27907700	27907899	199	hyper	0.444444	0.959184	0.789474	0.983333	1	0.952381	0.983607	0.7	0.75	0.272727	0.72	0.888889	0.657895	0.865169	0.585586	0.301676	0.0108696	0.0416667	0.520325	0.628019	0.765867
CHHDMR	1214	Bd21-3.CHH	Bd1	28371200	28371399	199	hypo	0.583333	0.416667	0.884615	0.6875	0.448276	0.648649	0.647059	0.0588235	0.0892857	0.923077	0.458333	0.25	0.259259	0.1	0.134503	0.0157895	0.438889	0.138889	0.292929	0.149194	0.147059
CHHDMR	1245	Bd21-3.CHH	Bd1	28966900	28967099	199	hypo	0.948031	0.974948	0.671958	0.677524	0.955137	0.652074	0.141573	0.507895	0.477612	0.358025	0.472727	0.415816	0.520408	0.0829876	0.0260173	0.0334572	0.257019	0.452188	0.0290179	0.311981	0.0871795
CHHDMR	1283	Bd21-3.CHH	Bd1	29689900	29690099	199	hypo	1	0.967742	1	1	0.871795	0.948718	1	0.285714	0.2	0.666667	0.166667	0.2	0.75	0.2	0.0419162	0.0261438	0.244444	0.533333	0.0729167	0.119403	0.144737
CHHDMR	1307	Bd21-3.CHH	Bd1	30196700	30196899	199	hypo	0.896552	0.892857	1	NA	1	1	1	0.529412	0.876923	0.809524	NA	0.846154	NA	NA	0.0218978	0.00440529	0.227848	NA	0.025	0	0
CHHDMR	1313	Bd21-3.CHH	Bd1	30306500	30306699	199	hypo	0	0	0.647059	NA	0	0	0.142857	0.0416667	0	0.0555556	NA	0.5	0	0.0909091	0	0	0.229167	NA	0	0.06	0.0425532
CHHDMR	1324	Bd21-3.CHH	Bd1	30462600	30462799	199	hypo	0.545455	0	0.289474	0	0	0	0.148936	0.238636	0.0147059	0.44	0	0.0666667	0.219512	0.393443	0.275779	0.013245	0.514563	0	0.0227273	0.182927	0.434783
CHHDMR	1326	Bd21-3.CHH	Bd1	30471500	30471699	199	hypo	1	0.945455	0.842105	0.580645	0.535714	0.676056	0.686131	0.724638	0.670886	0.25	0.4	0.297297	0.266667	0.364865	0.0689655	0.0206186	0.236842	0	0.05	0.0212766	0.124113
CHHDMR	1327	Bd21-3.CHH	Bd1	30472800	30472999	199	hypo	0.769231	1	0.909091	0.833333	1	0.925926	0.923077	0.9375	0.615385	0.75	0.7	0.375	0.428571	0.561404	0.0121212	0.0273973	0.457627	0.169811	0.282051	0.132597	0.150877
CHHDMR	1353	Bd21-3.CHH	Bd1	30924100	30924299	199	hypo	0.638095	0.794872	0.633333	NA	0	0.961538	0.709677	0.17284	0.105263	0.3	NA	0	0.269231	0.166667	0.0555556	0.0141844	0.321839	NA	0	0.106667	0.0194553
CHHDMR	1380	Bd21-3.CHH	Bd1	31453500	31453699	199	hypo	NA	1	1	NA	NA	NA	1	NA	0	1	NA	NA	NA	1	NA	0.0151515	0.631579	NA	NA	NA	0
CHHDMR	1399	Bd21-3.CHH	Bd1	31880900	31881099	199	hypo	0	0	0.384615	NA	NA	NA	0.117647	0	0	0.133333	NA	NA	NA	0	0.00662252	0.0326087	0.318966	NA	0.0625	NA	0.258621
CHHDMR	1433	Bd21-3.CHH	Bd1	32600300	32600499	199	hypo	0.983923	0.98325	0.980892	0.8	0.987382	0.987076	0.64	0.615385	0.818713	0.931034	0.815789	0.950617	0.822086	0.954545	0.0204082	0.0168539	0.554054	0.0909091	0.0229885	0.00552486	0.263158
CHHDMR	1452	Bd21-3.CHH	Bd1	32971600	32971799	199	hyper	0.913357	1	0.971223	NA	NA	NA	0.963597	0.716216	1	0.708738	NA	NA	NA	0.794798	0.00667408	0.944444	0.0139665	NA	0	0	0.0197472
CHHDMR	1460	Bd21-3.CHH	Bd1	33109100	33109499	399	hypo	0.928571	0.979798	0.94	1	0.962963	1	0.963964	0.40678	0.531915	0.6	0.588235	0.785714	0.5	0.568182	0.0589198	0.0158479	0.360377	0.0321101	0.0612903	0.0947368	0.212857
CHHDMR	1470	Bd21-3.CHH	Bd1	33250200	33250399	199	hypo	1	0.75	1	0.75	1	0.75	0.75	0.0909091	0	0.285714	0.166667	0.333333	0.047619	0.384615	0	0.00952381	0.356164	0.137255	0	0.035503	0.084507
CHHDMR	1476	Bd21-3.CHH	Bd1	33283700	33283899	199	hypo	0.961538	0.8	1	0.857143	1	0.818182	0.884615	1	1	1	0.842105	1	0.896552	0.681818	0.037931	0.0148148	0.253968	0.360153	0.0740741	0.197674	0.185915
CHHDMR	1501	Bd21-3.CHH	Bd1	33902000	33902199	199	hypo	1	0.875	1	NA	NA	1	0.428571	1	0.4	0.666667	NA	NA	1	0.333333	0.0869565	0	0.272727	NA	NA	0.0333333	0.0909091
CHHDMR	1541	Bd21-3.CHH	Bd1	34753100	34753299	199	hypo	0.959459	0.988166	0.980583	1	0.979167	0.967742	0.969466	0.479592	0.711111	0.876712	0.894737	0.913043	0.783784	0.642202	0.00632911	0.0322581	0.266667	0	0	0.0647059	0.0049505
CHHDMR	1548	Bd21-3.CHH	Bd1	34935000	34935199	199	hypo	0.863636	1	NA	1	NA	1	1	0.395349	0.483871	0.9	0.684211	0.625	0.653846	0.558824	0.0829493	0.0390244	0.21875	0.080292	0.0229885	0.0574163	0.0909091
CHHDMR	1570	Bd21-3.CHH	Bd1	35512800	35512999	199	hypo	0.983871	0.979452	1	0.910256	0.968085	0.941935	0.96	0.153846	0.364865	0.612903	0.25	0.397727	0.3	0.467742	0.205128	0.0201005	0.55814	0	0.00766284	0.138075	0.265193
CHHDMR	1584	Bd21-3.CHH	Bd1	36343200	36343399	199	hypo	0.875	0.921875	1	1	1	1	0.982759	0.925	0.767045	0.897959	0.865854	0.868056	0.858974	0.77451	0.823899	0.0442478	0.440594	0.021978	0.0236842	0.1258	0.150883
CHHDMR	1600	Bd21-3.CHH	Bd1	37010100	37010299	199	hypo	0.967532	0.974265	1	0.988827	0.951456	0.981308	0.968023	0.470588	0.604651	0.666667	0.75	0.645161	0.5625	0.596639	0.148045	0	0.320856	0.0344828	0.0133333	0.0172414	0.15212
CHHDMR	1617	Bd21-3.CHH	Bd1	37384100	37384299	199	hypo	0.666667	0.517241	0.583333	0.857143	1	0.75	0.535714	0.0666667	0.16	0.363636	0.454545	0.333333	0.307692	0.137931	0.0684932	0.0125	0.403846	0.104167	0.145833	0.104478	0.0652174
CHHDMR	1709	Bd21-3.CHH	Bd1	39293700	39293899	199	hypo	0.987893	0.985685	0.976143	0.987239	0.977833	0.980539	0.990575	0.74876	0.785124	0.820122	0.820675	0.780443	0.721739	0.777931	0.164992	0.0156076	0.257261	0.0096463	0.183623	0.156398	0.18369
CHHDMR	1734	Bd21-3.CHH	Bd1	39798000	39798199	199	hypo	0.6	1	0.847458	NA	0.878788	0.928571	0.925234	0.25	0.416667	0.358974	NA	0.8	0.25	0.649351	0	0	0.3125	NA	0.644068	0	0.175481
CHHDMR	1735	Bd21-3.CHH	Bd1	39799200	39799399	199	hyper	0.923077	0.90625	1	1	1	0.88	0.823529	0.363636	0.393939	0.4	NA	0.2	0.185185	0.52	0.042735	0.269231	0.015873	0	0.521739	0.13253	0.151899
CHHDMR	1758	Bd21-3.CHH	Bd1	40123300	40123499	199	hypo	0.964286	0.949153	0.846154	NA	0.956522	1	0.909091	0.865979	0.722222	0.83871	NA	0.724138	0.706897	0.782609	0.0087146	0	0.478632	NA	0.0129032	0.0206897	0.286667
CHHDMR	1763	Bd21-3.CHH	Bd1	40147800	40147999	199	hyper	0.772727	1	0.888889	NA	NA	NA	0.791667	0.272727	0.666667	0.666667	NA	NA	NA	0.454545	0.00323625	0.348837	0.0113636	NA	NA	NA	0.097166
CHHDMR	1766	Bd21-3.CHH	Bd1	40198800	40198999	199	hypo	0.893939	0.918033	0.896552	0.973684	0.921875	0.833333	0.801724	0.333333	0.628571	0.444444	0.75	0.6	0.470588	0.521739	0.14094	0.00537634	0.277778	0.0629371	0	0.031746	0.348432
CHHDMR	1768	Bd21-3.CHH	Bd1	40214200	40214399	199	hyper	0.955782	1	0.972376	0.947368	0.972973	0.920635	0.953811	0.6875	0.8	0.696	0.333333	0.8	0.722222	0.743056	0.0233051	0.283019	0.00407332	0.0930233	0.0666667	0.204918	0.0213858
CHHDMR	1776	Bd21-3.CHH	Bd1	40281400	40281599	199	hypo	0.912281	0.75	1	1	1	1	0.910112	0.37931	0	0.666667	NA	1	0	0.631579	0.0742496	0	0.262774	0.307692	0	0.017094	0.126801
CHHDMR	1801	Bd21-3.CHH	Bd1	40768600	40768799	199	hyper	0	0.5625	1	NA	NA	0.846154	0.538462	NA	0.583333	0.8	NA	NA	0.444444	0.4	0	0.340659	0	NA	NA	0.0147059	0.00847458
CHHDMR	1830	Bd21-3.CHH	Bd1	41505100	41505299	199	hypo	0.942857	0.92	0.967742	0.9	0.909091	0.968504	0.967153	0.769231	0.833333	0.946429	0.963636	1	0.882353	0.897541	0.219409	0.0410959	0.228361	0.392638	0.26506	0.110891	0.232143
CHHDMR	1847	Bd21-3.CHH	Bd1	41904700	41904899	199	hyper	0.804233	0.890845	0.965347	0.973958	0.908805	0.801325	0.882353	0.409449	0.633188	0.710692	0.857143	0.575758	0.617886	0.556391	0.0847107	0.291845	0.0319716	0.0213144	0.178707	0.329356	0.183258
CHHDMR	1863	Bd21-3.CHH	Bd1	42293700	42293899	199	hyper	0.942197	0.985816	0.994444	0.941935	0.985213	0.978355	0.976303	0.714286	0.81746	0.648148	0.93617	0.823529	0.849315	0.907143	0.0128205	0.209559	0	0.622642	0.0921053	0.289593	0.754137
CHHDMR	1891	Bd21-3.CHH	Bd1	42908300	42908499	199	hyper	0.966102	0.957447	0.962366	0.975	0.983721	0.983221	0.963255	0.55	0.575758	0.609756	0.603774	0.680412	0.549296	0.657143	0.0953757	0.255537	0.0188679	0.31746	0.188506	0.194842	0.23431
CHHDMR	1931	Bd21-3.CHH	Bd1	43633900	43634099	199	hypo	0.986644	0.969697	0.968254	0.962406	0.969355	0.878641	0.938119	0.666667	0.628272	0.808219	0.760563	0.610465	0.701299	0.805195	0.517391	0.00636943	0.619048	0	0.0367647	0.132231	0
CHHDMR	1962	Bd21-3.CHH	Bd1	43916300	43916499	199	hypo	0	0	1	NA	1	NA	NA	NA	NA	NA	NA	NA	NA	NA	0.108434	0.025641	0.28934	0.295918	0.13879	0.182768	0.0725275
CHHDMR	1965	Bd21-3.CHH	Bd1	44005900	44006099	199	hypo	0.605634	0.625	0.864865	0.916667	1	0.75	0.823529	0.26087	0	0.45	1	0	0.454545	0.384615	0.141447	0	0.254237	0.0571429	0.25	0.0202703	0.125
CHHDMR	1975	Bd21-3.CHH	Bd1	44162600	44162799	199	hypo	0.974865	0.942424	0.985075	0.90566	0.985782	0.988095	0.97733	0.733129	0.61435	0.753623	0.363636	0.844	0.626437	0.618375	0.0782918	0.0108527	0.275142	0.0111111	0.12069	0.0271399	0.0250991
CHHDMR	1976	Bd21-3.CHH	Bd1	44163900	44164099	199	hyper	0.0520833	0.921053	0.01	1	0.0909091	0.96	0.958904	0.0666667	0.666667	0.0289855	0.949153	0.0909091	0.773585	0.779592	0.0826446	0.381944	0.0186916	0.3	0.108696	0.159184	0.149254
CHHDMR	2015	Bd21-3.CHH	Bd1	44896600	44896899	299	hyper	0.960317	0.971698	0.980769	0.954545	0.709677	0.844828	0.867925	0.72381	0.762376	0.827586	0.5	0.533333	0.405405	0.692308	0.304348	0.393064	0.0108108	NA	0	0.0714286	0.461538
CHHDMR	2019	Bd21-3.CHH	Bd1	45025000	45025199	199	hypo	0.106667	0	0.322581	0	NA	0.3125	0.122449	0.015625	0.125	0.125	0	NA	0	0	0.0202429	0	0.277108	0	NA	0.326923	0.119792
CHHDMR	2040	Bd21-3.CHH	Bd1	45341400	45341599	199	hypo	0.022508	0.976519	0.987578	0.895197	0.862222	0.980349	0.878788	0.0220588	0.530973	0.548611	0.331897	0.1	0.296137	0.134021	0.00662252	0.00852273	0.415301	0.0225564	0.00724638	0.113772	0
CHHDMR	2049	Bd21-3.CHH	Bd1	45454500	45454699	199	hyper	0.913793	0.5625	0.857143	0.875	0.631579	0.833333	0.56	0.111111	0.5	0.25	1	0.2	0.384615	0.285714	0.182353	0.225	0.0363636	0.365854	0.370787	0.245614	0.211055
CHHDMR	2050	Bd21-3.CHH	Bd1	45457700	45457899	199	hypo	0	0	0.357143	0.5	0.277778	0.0784314	0.257143	0	0	0.121622	0.28125	0.166667	0.0666667	0.140351	0.0166667	0	0.230088	0.176471	0.165517	0.0518868	0.157895
CHHDMR	2071	Bd21-3.CHH	Bd1	45665500	45665699	199	hypo	0.866667	0	0.924528	0.971429	0	0.959459	0	0.489796	0	0.891892	0.606061	0	0.827586	0.0322581	0.0857143	0	0.472477	0.526786	0	0.401617	0
CHHDMR	2113	Bd21-3.CHH	Bd1	46282800	46282999	199	hyper	0.977444	0.97807	0.987179	0.981685	0.986864	0.962185	0.97678	0.765766	0.828947	0.842105	0.762376	0.849462	0.754386	0.763441	0.349887	0.219745	0.0232558	0.0212314	0.0437018	0.00909091	0.0373832
CHHDMR	2128	Bd21-3.CHH	Bd1	46808000	46808299	299	hypo	0.96875	1	0.125	1	0.545455	1	0.923077	0.866667	0.521739	0.666667	1	0.3	0.8125	0.541667	0.0173913	0.00917431	0.394904	0.196078	0.127451	0	0.00297619
CHHDMR	2129	Bd21-3.CHH	Bd1	46808700	46808899	199	hypo	0.5	0.928571	0.909091	NA	NA	1	0	0	0.111111	0.857143	NA	NA	0	NA	0	0	0.641509	NA	NA	0	0
CHHDMR	2130	Bd21-3.CHH	Bd1	46816300	46816499	199	hypo	0.995192	0.96	0.983333	0.666667	0.897375	0.989645	0.983129	0.522936	0.510949	0.855556	1	0.792793	0.745283	0.543807	0.0736842	0.0152672	0.391892	0	0.025	0.0310881	0.0430464
CHHDMR	2206	Bd21-3.CHH	Bd1	48566400	48566599	199	hypo	0.75	0	1	0.666667	1	1	1	NA	NA	NA	1	NA	NA	NA	0	0.0108696	0.267857	0.209302	0.22	0.5	0.161765
CHHDMR	2216	Bd21-3.CHH	Bd1	48807200	48807399	199	hyper	0.829268	1	0.988372	1	0.888889	0.857143	1	0.622951	0.541667	0.644737	0.6	0.333333	0.6	0.382353	0.162393	0.313253	0.0178571	0.272727	0.047619	0.0526316	0.0866142
CHHDMR	2218	Bd21-3.CHH	Bd1	48823600	48823799	199	hypo	1	0.945946	0.818182	1	1	0.963636	1	0.882353	0.909091	1	1	1	0.857143	0.833333	0.020979	0.008	0.341463	0	0.196078	0.0196078	0
CHHDMR	2219	Bd21-3.CHH	Bd1	48892100	48892299	199	hyper	0.571429	0.142857	1	0	1	1	0	0	0.222222	0	0	0	0	0	0.00393701	0.384615	0	0	0	0	0.0131579
CHHDMR	2223	Bd21-3.CHH	Bd1	48961200	48961399	199	hypo	0.95	0.36	0.978378	0.84058	0.869565	0.898649	0.958246	0.907317	0.980392	0.970297	0.851064	0.792453	0.819277	0.922559	0.0664452	0	0.312668	0.011236	0	0.116564	0.072445
CHHDMR	2230	Bd21-3.CHH	Bd1	49020600	49020799	199	hyper	0.954198	0.974684	0.974359	0.940541	0.941423	0.930736	0.95122	0.623967	0.559322	0.6	0.654206	0.336957	0.719512	0.648069	0.0138889	0.284884	0.032	0.0218182	0.0446097	0.0381679	0.0332447
CHHDMR	2235	Bd21-3.CHH	Bd1	49128900	49129099	199	hypo	0.935484	0.777778	1	1	0.5	0.9	0.952381	0.513514	0.272727	0.964286	1	0	0.698113	0.851852	0.0927318	0	0.356877	0.150538	0	0.252137	0.115304
CHHDMR	2237	Bd21-3.CHH	Bd1	49151800	49151999	199	hypo	0.846154	0.761062	0.996795	0.6	0.639175	0.972313	0.973126	0.5625	0.875	0.62201	0.636364	0.846154	0.702811	0.708408	0	0.0294118	0.414676	0	0	0.143293	0.178451
CHHDMR	2248	Bd21-3.CHH	Bd1	49372100	49372299	199	hypo	0.615385	0.75	0.692308	1	0	NA	0.75	0.357143	0	0.61194	NA	0.666667	0.5	0.380952	0.0707965	0	0.277228	0	0.213675	0.470588	0.147541
CHHDMR	2250	Bd21-3.CHH	Bd1	49400500	49400699	199	hypo	0.163934	0.928571	0.967742	1	0.607143	0.857143	0.27907	0	0	0.930435	0	0.0454545	0	0.015625	0	0.0147059	0.342365	0	0.0116959	0	0.00371747
CHHDMR	2251	Bd21-3.CHH	Bd1	49421900	49422099	199	hyper	0.5	NA	0.972222	1	0.94702	0.583333	0.803279	1	NA	0.912281	1	0.865672	0.709677	0.647059	0.145161	0.333333	0.015	0	0.0135501	0.0628931	0.0339943
CHHDMR	2263	Bd21-3.CHH	Bd1	49790200	49790399	199	hypo	0.640244	0.785714	0.627907	0.714286	0.333333	0.653846	0.840909	0.485714	0.319149	0.25	0.636364	0.0666667	0.323944	0.466667	0.236181	0.0365854	0.425	0.166667	0.347222	0.127273	0.141414
CHHDMR	2295	Bd21-3.CHH	Bd1	50458000	50458199	199	hypo	0.857143	0.8	0.888889	NA	1	NA	1	0.9	0.909091	0.952381	1	1	0.875	0.8	0.315789	0.0106383	0.369231	0.645833	0.5	0.0735294	0.252525
CHHDMR	2347	Bd21-3.CHH	Bd1	51488700	51488899	199	hypo	1	0.285714	0.5	1	0.75	0.928571	1	0	0	0.2	0	0	0	0	0.00917431	0.029703	0.471429	0.0666667	0.230769	0.494253	0.192308
CHHDMR	2381	Bd21-3.CHH	Bd1	52087100	52087299	199	hypo	0.968504	0.978417	1	0.75	1	1	0.893617	0.709898	0.846608	0.973684	0.8	0.895522	0.868613	0.841121	0.0249042	0.00815661	0.238095	0	0	0.0805785	0.0480349
CHHDMR	2402	Bd21-3.CHH	Bd1	52451000	52451199	199	hyper	0.84	0.583333	1	0.5	1	1	0.972222	0.6	0.8	0.636364	1	0.2	1	0.5	0	0.204969	0.0198675	0.1	0.0428571	0	0.030303
CHHDMR	2416	Bd21-3.CHH	Bd1	52756600	52756799	199	hypo	0.730769	1	1	1	0.896552	1	1	0.826087	0.83871	1	1	0.866667	0.777778	0.809524	0.0657895	0.0421053	0.296296	0.227273	0.313433	0.188679	0.120968
CHHDMR	2419	Bd21-3.CHH	Bd1	52837800	52837999	199	hypo	0.925373	0.984848	1	1	0.88	1	1	0.843137	0.746032	0.764706	0.722222	0.909091	0.761905	0.746269	0.0301047	0.0233723	0.285047	0.0235294	0.00515464	0	0.0250896
CHHDMR	2427	Bd21-3.CHH	Bd1	53055200	53055499	299	hyper	0.934343	0.963158	0.966292	0.984221	0.977667	0.963415	0.977778	0.619048	0.581921	0.6	0.601504	0.551402	0.480769	0.428571	0.0897436	0.343874	0	0.00862069	0	0.236842	0
CHHDMR	2437	Bd21-3.CHH	Bd1	53361400	53361599	199	hyper	0.976744	0.846154	0.916667	1	NA	0.95082	1	0.541985	0.515152	0.897059	1	0.8125	0.701493	0.773196	0.260714	0.24359	0	0.0568182	0	0.293578	0.0119048
CHHDMR	2460	Bd21-3.CHH	Bd1	53741600	53741799	199	hypo	0.97561	1	0.888889	1	1	0.970588	1	0.416667	0.25	0.333333	1	NA	0	0.333333	0.0454545	0.0215054	0.38	0	0.0952381	0.133333	0.0965517
CHHDMR	2516	Bd21-3.CHH	Bd1	54917000	54917199	199	hyper	0.018018	0.989051	0.967568	0.990909	0.974093	0.966667	0.987864	0	0.778302	0.790541	0.811321	0.791667	0.847716	0.815331	0.00806452	0.261803	0.0171569	0.00787402	0.234234	0.271375	0.181579
CHHDMR	2531	Bd21-3.CHH	Bd1	55209000	55209199	199	hypo	0.835616	0.979167	0.983871	0.973684	0.995	0.959707	0.962963	0.483871	0.477612	0.642857	1	0.707692	0.538462	0.4	0.03125	0	0.289855	0.0555556	0.147059	0.0416667	0
CHHDMR	2540	Bd21-3.CHH	Bd1	55378900	55379099	199	hypo	0.843137	0.961538	0.833333	1	0.625	0.875	0.515152	0.0857143	0.27027	0.133333	0	0	0.176471	0.0769231	0.0291971	0.0445104	0.284553	0.156716	0.232143	0.0590406	0.161049
CHHDMR	2550	Bd21-3.CHH	Bd1	55710700	55710899	199	hypo	0.741935	0.454545	0.866667	0.8	0.727273	0.684211	0.886364	0.5	0.428571	0.55	0.529412	0.657143	0.258065	0.676471	0.0992366	0.0198675	0.284884	0.460317	0.269373	0.220339	0.295367
CHHDMR	2556	Bd21-3.CHH	Bd1	55819800	55819999	199	hyper	NA	NA	NA	NA	NA	NA	NA	0.704082	0.854251	0.766667	0.466667	0.674419	0.717742	0.829545	0.0121951	0.449219	0.0217391	0.0125	0.0227273	0.468966	0.693452
CHHDMR	2570	Bd21-3.CHH	Bd1	56040100	56040299	199	hypo	NA	0.478261	1	NA	0.777778	0.636364	0.588235	NA	0.0416667	0.333333	NA	0.666667	0.333333	0	NA	0.0215827	0.488372	NA	0.175439	0.131148	0.118812
CHHDMR	2589	Bd21-3.CHH	Bd1	56557600	56557799	199	hypo	0.94	0.875	1	0.968912	0.982036	0.983696	0.96679	0.92	0.829268	0.891089	0.788321	0.892857	0.835294	0.877419	0	0.0136986	0.565217	0.04	0.034965	0.3861	0.698002
CHHDMR	2612	Bd21-3.CHH	Bd1	56964800	56965099	299	hypo	0.810526	0.953488	0.966292	0.822785	0.930556	0.95942	0.903226	0.612613	0.625	0.769231	0.625	0.6	0.731429	0.8125	0.0288462	0.0131579	0.380282	0	0	0.00510204	0.0178571
CHHDMR	2620	Bd21-3.CHH	Bd1	57155700	57155899	199	hypo	0.584559	0.00769231	0.541935	0.961039	0.661417	0	0.037037	0.323383	0.0309278	0.495575	0.307407	0.394231	0	0.0222222	0.0880361	0.00434783	0.356618	0.0194175	0.203762	0	0.0173913
CHHDMR	2621	Bd21-3.CHH	Bd1	57232000	57232199	199	hyper	0.373832	0.380952	0.0625	0	NA	0.428571	0.0833333	0.228571	0	0.0714286	0	NA	0.2	0.5	0.0786885	0.298701	0	0	NA	0.0285714	0
CHHDMR	2645	Bd21-3.CHH	Bd1	57589400	57589599	199	hypo	0.727273	1	1	NA	NA	NA	NA	0.866667	1	1	NA	1	NA	NA	0.112403	0	0.282051	NA	0.25	NA	NA
CHHDMR	2646	Bd21-3.CHH	Bd1	57690100	57690299	199	hyper	1	1	1	1	NA	1	NA	0.4	0.666667	0.6	0.5	NA	0.8	NA	0	0.333333	0.0149254	0.0243902	NA	0	NA
CHHDMR	2647	Bd21-3.CHH	Bd1	57732200	57732399	199	hyper	0.960784	0.928571	0.979592	NA	1	0.857143	NA	0.628571	0.5	0.794118	NA	NA	0.333333	NA	0.0471976	0.264706	0.0281124	NA	0.615385	0	NA
CHHDMR	2662	Bd21-3.CHH	Bd1	57972700	57972899	199	hypo	0.934694	0.975186	1	0.984043	0.884354	0.935644	0.87055	0.647059	0.513699	0.666667	0.698113	0.684211	0.686567	0.689189	0.0135593	0	0.544118	0.0144928	0.016129	0.00293255	0.025641
CHHDMR	2666	Bd21-3.CHH	Bd1	58078800	58078999	199	hypo	0.706215	0.646875	0.718519	0	0.591398	0.711864	0	0.244444	0.0310078	0.3125	0.125	0.363636	0.130952	0	0.078714	0.0174216	0.227397	0	0.0197368	0.0479574	0.0217391
CHHDMR	2695	Bd21-3.CHH	Bd1	58611700	58611899	199	hyper	0.963415	0.961832	0.940476	0.982456	0.957944	1	0.984314	0.76378	0.89313	0.890756	0.839662	0.879195	0.777273	0.86755	0.00970874	0.422907	0	0.121951	0.0183486	0.453237	0.518041
CHHDMR	2715	Bd21-3.CHH	Bd1	58988900	58989099	199	hypo	0.714286	1	0.857143	NA	1	1	0.965517	0.671429	0.697674	0.894737	1	0.809524	0.68	0.782609	0	0	0.29	NA	0.0444444	0	0.108108
CHHDMR	2784	Bd21-3.CHH	Bd1	60649800	60649999	199	hypo	0.935583	0.961977	0.95679	0	0.962099	0.975669	0.962798	0.684685	0.677233	0.712766	0	0.572193	0.502222	0.558583	0.0639098	0.00906002	0.362869	0	0.0078125	0.222482	0.0231729
CHHDMR	2827	Bd21-3.CHH	Bd1	61520400	61520599	199	hyper	0.952141	0.509662	0.974138	0.982301	0.758794	0.956298	0.96173	0.446735	0.483333	0.505952	0.530466	0.533597	0.514196	0.606667	0.0486726	0.467234	0.0111732	0.0858144	0.380824	0.0463458	0.0592824
CHHDMR	2842	Bd21-3.CHH	Bd1	61953400	61953599	199	hypo	0.4	1	1	NA	NA	1	1	0	0	NA	NA	NA	NA	0	0.0769231	0	0.384615	NA	0.526316	0.142857	0.121622
CHHDMR	2853	Bd21-3.CHH	Bd1	62033700	62033899	199	hypo	0.98008	0.923077	0.960784	0.927273	0.979592	0.943128	0.980198	0.897436	0.5	0.6	1	0.545455	0.5	0.722222	0.0526316	0	0.346154	0	0	0.0420168	0.0295567
CHHDMR	2864	Bd21-3.CHH	Bd1	62325300	62325499	199	hypo	0.222222	0	0	NA	0.166667	0.142857	NA	0.111111	0.454545	0.375	0	1	0.571429	0.0625	0.126582	0.0181818	0.333333	NA	0.208955	0.142857	0.111111
CHHDMR	2935	Bd21-3.CHH	Bd1	63647600	63647799	199	hypo	0.969231	0.0769231	0.9375	0	0.533333	0	0.78	0.2	0	0.210526	0	0	0	0.0689655	0.00666667	0	0.375	0	0	0	0.0591133
CHHDMR	2946	Bd21-3.CHH	Bd1	63833900	63834099	199	hyper	0.978723	0.975684	1	0.962441	0.991803	0.987854	0.980273	0.781955	0.833333	0.466667	0.892857	0.962963	0.796875	0.865741	0.601732	0.461003	0	0.261146	0.634146	0.456053	0.671744
CHHDMR	2954	Bd21-3.CHH	Bd1	63935000	63935199	199	hyper	0.964286	0.963158	0.987805	0.988235	0.910755	0.952756	0.962712	0.631579	0.7343	0.753086	0.642857	0.670616	0.678161	0.735395	0.0309735	0.552419	0	0.0285714	0.0176991	0.0179641	0.322981
CHHDMR	2975	Bd21-3.CHH	Bd1	64361500	64361699	199	hypo	0.321429	0.2	0.454545	NA	0.428571	0.384615	0.388889	0.466667	0.333333	0.5	NA	0.333333	0.5	0.428571	0.309091	0.0113636	0.706897	1	0.0892857	0.520833	0.229167
CHHDMR	3013	Bd21-3.CHH	Bd1	65211800	65211999	199	hypo	0.0133333	0.05	0.911765	0.907407	NA	0	0	0.0526316	0.03125	0.54	0.939394	NA	0	0	0	0.020979	0.218085	0.412214	NA	0	0.0142857
CHHDMR	3029	Bd21-3.CHH	Bd1	65566000	65566199	199	hyper	0.882353	1	1	1	1	1	1	0.882353	0.625	1	0.333333	0.727273	0.777778	0.916667	0.111111	0.360656	0.0392157	0	0.25	0.234375	0.0545455
CHHDMR	3036	Bd21-3.CHH	Bd1	65677500	65677699	199	hyper	0.958442	0.976501	0.971429	0.912	0.980716	0.982906	0.93797	0.534722	0.554545	0.288889	0.568345	0.813333	0.688312	0.63125	0.257576	0.246964	0.016129	0.0078125	0.0291262	0.0144404	0.153439
CHHDMR	3043	Bd21-3.CHH	Bd1	65768000	65768199	199	hypo	0.8375	0.986301	0.943396	0.933333	1	0.953488	0.977273	0.558824	0.772727	0.837838	0.5	0.853659	0.85	0.8	0.0944742	0.0155763	0.251656	0.113636	0.168459	0.107417	0.099631
CHHDMR	3046	Bd21-3.CHH	Bd1	65829600	65829799	199	hyper	1	1	1	NA	NA	1	1	0.333333	0.631579	0.5	NA	NA	0.344828	1	0.0655738	0.389706	0	NA	NA	0.222857	0.583333
CHHDMR	3062	Bd21-3.CHH	Bd1	66202100	66202399	299	hypo	0.693182	0.666667	0.912281	0.92	0.894737	0.860465	0.872549	0.460317	0.333333	0.763158	0.674419	0.623762	0.4	0.486842	0.0349462	0.0290698	0.342742	0.197452	0.0282776	0.0150754	0.0714286
CHHDMR	3085	Bd21-3.CHH	Bd1	66839000	66839199	199	hypo	1	0.833333	0.4	1	NA	0.863636	0.972222	0.36	0.433333	0.5	0.428571	NA	0.35	0.413793	0	0.0235294	0.571429	0.02	NA	0.0298507	0.109827
CHHDMR	3087	Bd21-3.CHH	Bd1	66889500	66889699	199	hypo	1	0	1	0	NA	0.153846	0	0.533333	0.125	0.666667	0	NA	0.571429	0.166667	0.0459184	0.00531915	0.416667	0	1	0.291667	0.142857
CHHDMR	3118	Bd21-3.CHH	Bd1	67683400	67683599	199	hyper	0.841121	0.913043	0.978723	0.977679	0.987578	0.964361	0.870324	0.559322	0.658537	0.6	0.307692	0.421053	0.269231	0.652174	0.215232	0.546512	0	0.00732601	0.00574713	0.140244	0.589109
CHHDMR	3120	Bd21-3.CHH	Bd1	67743200	67743399	199	hypo	0.628049	0.644737	0.860215	0.788889	0.893204	0.642857	0.62963	0.409574	0.317073	0.533333	0.531915	0.617647	0.388889	0.371212	0.206169	0.00294118	0.251366	0.156051	0.0659091	0.172727	0.080292
CHHDMR	3137	Bd21-3.CHH	Bd1	68090000	68090199	199	hyper	0.995146	0.96577	1	0.978836	0.972561	0.990544	0.969404	0.670807	0.699482	0.84	0.770492	0.466667	0.657459	0.707113	0.331126	0.35782	0.00735294	0.0188679	0.0485437	0.443694	0.504232
CHHDMR	3141	Bd21-3.CHH	Bd1	68218200	68218399	199	hypo	0	NA	1	NA	NA	1	NA	0	0.0714286	0.8	0.1	0.4	0.466667	0.0769231	0.00833333	0	0.261905	0.0559006	0	0.0822368	0.0297619
CHHDMR	3149	Bd21-3.CHH	Bd1	68445900	68446099	199	hypo	0.955182	0.96699	0.988889	0.909091	0.982507	0.975379	0.977124	0.462617	0.600746	0.706522	NA	0.606383	0.659176	0.403509	0.00308642	0.0116448	0.211823	0.333333	0.0600375	0.0342772	0.0789474
CHHDMR	3174	Bd21-3.CHH	Bd1	69049300	69049499	199	hypo	0	0.0188679	0.876404	0.0909091	0.047619	0	0.803738	0	0.010101	0.794643	0	0	0.0208333	0.6125	0.00742574	0.0117647	0.335907	0	0	0	0.298592
CHHDMR	3179	Bd21-3.CHH	Bd1	69138600	69138799	199	hypo	0.666667	0.875	1	0.909091	1	0.757576	0.947368	0.0357143	0.0909091	0	0	0	0.0555556	0	0.0419162	0.00884956	0.428571	0.288462	0.166667	0.175573	0.153846
CHHDMR	3194	Bd21-3.CHH	Bd1	69441100	69441299	199	hypo	0.866667	0.92	0.951807	0.944444	0.956044	0.992366	0.980769	0.575	0.764706	0.638889	0.863636	0.939394	0.888889	0.854545	0.0929204	0	0.306265	0.0207254	0.0664653	0.0272374	0.104839
CHHDMR	3234	Bd21-3.CHH	Bd1	70261100	70261299	199	hypo	0.909091	0.977778	1	NA	0.816667	0.955882	1	1	0.592593	0.9	NA	0.478261	0.857143	0.75	0	0	0.863636	NA	0.0666667	0	0.0769231
CHHDMR	3245	Bd21-3.CHH	Bd1	70394200	70394399	199	hypo	0.757576	0	0.944444	0.833333	NA	0.784483	NA	0.0217391	0	0.844444	0	0	0.775	0	0.0952381	0	0.219653	0.12069	0	0.289362	0
CHHDMR	3247	Bd21-3.CHH	Bd1	70398000	70398199	199	hypo	1	1	0.956522	0.961538	1	0.963636	1	0.9375	0.666667	0.5	0.333333	0.333333	0.75	0	0.104	0.0234899	0.262195	0.191667	0.15625	0.163333	0.271429
CHHDMR	3255	Bd21-3.CHH	Bd1	70604400	70604599	199	hypo	1	1	1	1	0.883721	0.857143	0.909091	0.0967742	0.272727	0.047619	0	0.1	0	0.0909091	0.00649351	0.0145985	0.309091	0.0776699	0.0601852	0.0980392	0.0434783
CHHDMR	3268	Bd21-3.CHH	Bd1	70838200	70838399	199	hyper	0.914286	0.666667	1	NA	1	0.95122	0.967742	0.753247	0.857143	0.764706	NA	0.333333	0.72973	0.777778	0.0357143	0.333333	0.0075188	NA	0	0	0.0155039
CHHDMR	3279	Bd21-3.CHH	Bd1	71181300	71181499	199	hypo	0	0	0.777778	1	0.555556	0	0	0.153846	0.0212766	0.692308	0.818182	0.44	0	0.107143	0	0.00469484	0.343137	0.592593	0.148148	0	0
CHHDMR	3283	Bd21-3.CHH	Bd1	71280100	71280299	199	hypo	0.935484	0.820513	0.97619	1	0.967742	0.956522	0.973684	0.589744	0.8	0.6	0.6875	0.8	0.863636	0.636364	0.10929	0	0.333333	0.108911	0.368421	0.380952	0.1
CHHDMR	3314	Bd21-3.CHH	Bd1	71869500	71869699	199	hypo	0.923077	0.647059	1	1	0.821429	0.466667	0.916667	NA	NA	NA	NA	NA	NA	NA	0.281853	0.0482955	0.391753	0.223022	0.270213	0.261649	0.196375
CHHDMR	3316	Bd21-3.CHH	Bd1	71908800	71908999	199	hypo	0	0.125	1	1	0	1	0	0.030303	0	0.875	0.571429	0	0.666667	0	0.0151515	0	0.283019	0	0	0.0441176	0
CHHDMR	3366	Bd21-3.CHH	Bd1	73106900	73107199	299	hypo	0.903382	0.977011	0.969072	0.975758	0.974265	0.955056	0.974138	0.583333	0.740458	0.692308	0.8125	0.784615	0.88172	0.71345	0.145558	0.0372578	0.296137	0.143564	0.0564885	0.280899	0.0548926
CHHDMR	3369	Bd21-3.CHH	Bd1	73247200	73247399	199	hypo	0.0833333	0.030303	0.958333	NA	0.461538	0.820513	0.0588235	0.142857	0.0263158	0.888889	NA	0.222222	0.347826	0.0425532	0.00833333	0.00869565	0.215385	NA	0	0.0384615	0.0319149
CHHDMR	3373	Bd21-3.CHH	Bd1	73349300	73349499	199	hypo	0.833333	0.909091	0.9375	NA	1	0.866667	1	0.4375	0.5625	0.555556	NA	0.666667	1	0.294118	0.0135135	0	0.290909	NA	0.116279	0.409091	0
CHHDMR	3379	Bd21-3.CHH	Bd1	73574700	73574899	199	hypo	1	1	1	1	1	1	1	0.521739	0.8	0.857143	0.8	0.666667	0.727273	0.684211	0.0172414	0.0142857	0.220339	0.037037	0	0.0246914	0.0119048
CHHDMR	3417	Bd21-3.CHH	Bd1	74609800	74609999	199	hypo	0.95082	1	1	1	0.666667	1	0.956522	0.75	0.8	0.8125	0.896552	1	0.875	0.894737	0.0315399	0.0116959	0.212121	0.0138249	0.028169	0.0165746	0.056872
CHHDMR	3423	Bd21-3.CHH	Bd1	74723700	74723899	199	hyper	0.96558	0.991614	0.986159	0.972222	0.970109	0.968668	0.979624	0.450549	0.75	0.545455	0.677966	0.846154	0.678161	0.787879	0.149254	0.277603	0.0123457	0.0144928	0.201058	0.502841	0.524462
CHHDMR	3481	Bd21-3.CHH	Bd2	1766100	1766299	199	hyper	1	0.75	1	1	1	0.9	1	0.722222	0.785714	1	1	1	0.904762	0.944444	0.091954	0.339623	0.0208333	0.18797	0.0188679	0.0405405	0.151261
CHHDMR	3518	Bd21-3.CHH	Bd2	2549400	2549599	199	hyper	0.903226	0.875	0.875	1	0.821429	0.75	0.75	0.75	0	0	NA	0	0	0.1	0.308057	0.312821	0.016	0.411765	0.181287	0.382979	0.17931
CHHDMR	3549	Bd21-3.CHH	Bd2	3571900	3572099	199	hypo	0.82	1	0.909091	1	0.75	0.777778	0.8	0.616667	0.268293	0.896552	0.378378	0.727273	0.659091	0.382353	0.0268949	0.0354331	0.218543	0.032	0.0210526	0.0196078	0.0633484
CHHDMR	3565	Bd21-3.CHH	Bd2	3992300	3992499	199	hypo	0.125	0	0	0	0	0.0222222	0.04	0	0	0	0	0	0	0.1	0.0519481	0	0.273973	0.166667	0	0	0.0909091
CHHDMR	3570	Bd21-3.CHH	Bd2	4014700	4014899	199	hypo	0.973485	0.954861	0.98	0.971963	0.945652	0.962547	0.981413	0.586777	0.76129	0.655172	0.75	0.738462	0.712551	0.70852	0.0682171	0.0375839	0.231527	0.0383142	0.037694	0.126476	0.0481541
CHHDMR	3573	Bd21-3.CHH	Bd2	4040500	4040699	199	hypo	0.625	0.892857	0.944444	0.818182	1	0.833333	0.918033	0.375	0.526316	0.707317	0.428571	0.6875	0.2	0.5625	0.1375	0.0449438	0.461165	0	0.0588235	0	0.261538
CHHDMR	3583	Bd21-3.CHH	Bd2	4219400	4219599	199	hypo	0.142857	0.285714	0.888889	1	0.25	0.5	0.2	1	0.75	1	1	1	NA	1	0.0253165	0	0.341176	0.0507246	0.0277778	0.305556	0.0163934
CHHDMR	3600	Bd21-3.CHH	Bd2	4588300	4588499	199	hypo	0.915385	0.934066	1	0.875	0.488372	0.942857	0.838462	0.517986	0.443299	0.35	0.35	0.137931	0.596386	0.227273	0.063745	0.043956	0.213333	0	0	0.015	0.0548523
CHHDMR	3623	Bd21-3.CHH	Bd2	5011200	5011399	199	hypo	0	0	0.357143	0	0	0	0.210526	0.117647	0.1	0.290323	1	0.333333	0.116279	0.0862069	0.0175439	0	0.41958	0.125	0.176471	0.225434	0.213592
CHHDMR	3634	Bd21-3.CHH	Bd2	5214000	5214199	199	hyper	0.96	1	1	0.981481	0.919028	0.937008	0.982709	0.540984	0.428571	0.235294	0.551724	0.568627	0.291667	0.491525	0.032967	0.372093	0	0.0153846	0	0	0.0227273
CHHDMR	3635	Bd21-3.CHH	Bd2	5229800	5229999	199	hypo	1	1	1	1	0.941176	1	1	0	0	0.666667	NA	0.5	NA	0.5	0	0	0.32	0	0.125	0.0666667	0
CHHDMR	3637	Bd21-3.CHH	Bd2	5248100	5248299	199	hypo	1	0.962963	0.3	0.777778	0.47619	0.255319	0.275362	0.2	0.1	0.289855	NA	0	0.487805	0.0588235	0.142857	0.00641026	0.625	0.26	0.0204082	0.507463	0.11032
CHHDMR	3674	Bd21-3.CHH	Bd2	6081500	6081699	199	hyper	0.8	0.75	0.666667	NA	0.8	1	0.833333	NA	1	0	NA	0	1	1	0.0347826	0.375	0.0273973	0	0	0.244898	0.0833333
CHHDMR	3690	Bd21-3.CHH	Bd2	6588700	6588899	199	hypo	NA	0.967742	0.944444	1	0.966102	0.907407	0.888112	1	0.97037	0.982143	0.666667	0.931373	0.878947	0.826667	0	0.0294118	0.237113	0.0833333	0.10989	0.119078	0.0611888
CHHDMR	3693	Bd21-3.CHH	Bd2	6630300	6630499	199	hypo	0.972973	0.960784	1	1	0.869565	1	0.967742	0.294118	0.539823	0.666667	0.577143	0.468354	0.612903	0.604396	0	0.0140845	0.35443	0.105263	0.0928962	0.144262	0.0349345
CHHDMR	3697	Bd21-3.CHH	Bd2	6747400	6747599	199	hypo	0.983108	0.982143	0.978417	0.980769	0.0191571	0.981651	0.981481	0.700893	0.851562	0.783333	0.897959	0.0165289	0.884615	0.89418	0.115174	0.0203046	0.516129	0.00606061	0	0.244681	0.0843373
CHHDMR	3724	Bd21-3.CHH	Bd2	7271000	7271199	199	hypo	1	0.897059	0.941176	0.954545	0.913043	0.955556	0.962406	0.0967742	0.357143	0.352941	0	0.333333	0.515152	0.361702	0.0402542	0.0258216	0.459559	0.328947	0.026087	0.427061	0.371517
CHHDMR	3728	Bd21-3.CHH	Bd2	7355600	7355799	199	hypo	0.933333	0.733333	1	1	1	0.903226	0.926471	0.294118	0.333333	0.625	NA	0.428571	0.636364	0.55	0.175676	0.025	0.369318	0.0416667	0.4	0.346253	0.467066
CHHDMR	3733	Bd21-3.CHH	Bd2	7461000	7461199	199	hypo	0.716535	0.131579	0.684211	0.444444	0.693431	0.53125	0.730769	0.505495	0.12	0.513514	0.666667	0.602041	0.378378	0.538462	0.102767	0.017094	0.388889	0	0.11245	0.0645161	0.0949367
CHHDMR	3771	Bd21-3.CHH	Bd2	8250300	8250499	199	hypo	1	1	0.875	0.666667	0.666667	0.727273	1	0.745455	0.933333	0.636364	0.636364	0.714286	0.9375	0.8125	0.0180412	0	0.233766	0.0106383	0.371429	0.164384	0.0127389
CHHDMR	3819	Bd21-3.CHH	Bd2	8873100	8873299	199	hypo	0.926063	0.970732	0.983539	0.954545	0.984043	0.960784	0.979899	0.75	0.447368	0.779661	0.733333	0.777778	0.640625	0.90099	0.483516	0.0178571	0.453202	0.025974	0.113924	0.153846	0.709424
CHHDMR	3829	Bd21-3.CHH	Bd2	9118700	9118899	199	hypo	0.854545	0.928571	0.928571	1	1	1	0.942857	0.485294	0.619048	0.764706	0.823529	0.695652	0.542857	0.582734	0.0517241	0.04	0.315217	0.181818	0.0461538	0.0234375	0.0964286
CHHDMR	3837	Bd21-3.CHH	Bd2	9239000	9239199	199	hypo	0.970588	0.962963	1	1	1	1	0.771429	0.311475	0.285714	0.666667	0.5	0.681818	0.568182	0.666667	0.0327273	0.0272727	0.333333	0.122449	0.0588235	0.0546448	0.133333
CHHDMR	3847	Bd21-3.CHH	Bd2	9456800	9456999	199	hypo	0.789474	0.0728477	0.823529	0.850746	0.0941176	0.793548	0.02	0.54955	0.00793651	0.690909	0.814286	0	0.443609	0.0138889	0.12943	0.00625	0.279188	0.30581	0.00508906	0.222222	0.00280112
CHHDMR	3859	Bd21-3.CHH	Bd2	9668400	9668599	199	hypo	0.990196	0.988636	0.966667	1	1	0.958763	0.985714	0.586207	0.568627	0.571429	1	0.857143	0.629032	0.621622	0.0923695	0.0328638	0.277027	0	0.239583	0.231544	0.0609756
CHHDMR	3927	Bd21-3.CHH	Bd2	11010100	11010299	199	hypo	0.983146	0.982379	0.951923	0	0.963563	0.9801	0.978723	0.834862	0.89375	0.776316	0.0340909	0.948276	0.893333	0.902098	0.0153846	0.0103093	0.335106	0.00943396	0.00680272	0.186761	0.468864
CHHDMR	3955	Bd21-3.CHH	Bd2	11373100	11373299	199	hypo	0.963636	1	1	1	0.868421	0.807692	0.942857	0.763636	0.730769	0.723404	0.858025	0.752212	0.530612	0.759804	0.193656	0.0332326	0.284281	0.404896	0.468354	0.329646	0.256617
CHHDMR	3964	Bd21-3.CHH	Bd2	11516100	11516299	199	hypo	NA	NA	NA	NA	NA	NA	NA	0.8	1	0.5	1	NA	0.75	1	0.150997	0.0155039	0.430279	0.789474	0	0.247573	0.266667
CHHDMR	3989	Bd21-3.CHH	Bd2	12181400	12181599	199	hyper	0.974811	0.980036	0.86036	0.978091	0.967262	0.973196	0.985694	0.879765	0.894495	0.896175	0.877159	0.873239	0.880597	0.906863	0.0115321	0.246753	0.0185185	0.102015	0.121951	0.140684	0.253705
CHHDMR	4001	Bd21-3.CHH	Bd2	12559100	12559299	199	hypo	1	0	0.6	0.666667	0.347826	0.5	NA	0	0	0.684211	0.603774	0.463576	0.560976	0	0.0306122	0	0.337607	0.419512	0.311069	0.40824	0
CHHDMR	4037	Bd21-3.CHH	Bd2	13479200	13479399	199	hyper	NA	0.91497	0.983827	NA	NA	0.968203	NA	NA	0.67609	0.7525	NA	NA	0.679525	NA	NA	0.224517	0.015896	NA	NA	0.0168209	NA
CHHDMR	4054	Bd21-3.CHH	Bd2	13942900	13943099	199	hypo	0.285714	0.222222	0	0.5	0.666667	0.25	0.625	0.166667	0.0909091	0	0.166667	0	0.125	0.0769231	0.139535	0.04	0.357143	0.166667	0	0.136364	0.261905
CHHDMR	4065	Bd21-3.CHH	Bd2	14288100	14288299	199	hypo	NA	1	1	NA	NA	NA	NA	NA	0.608696	0.888889	1	NA	NA	NA	NA	0.0204082	0.433333	0	0	NA	NA
CHHDMR	4104	Bd21-3.CHH	Bd2	15205000	15205199	199	hypo	0.917476	0.973134	0.981481	0.986301	0.994975	0.958333	0.974026	0.0598291	0.197183	0.395349	0.142857	0.317829	0.0761905	0.333333	0.00539084	0.0108225	0.352332	0	0.0147601	0.00401606	0.0186667
CHHDMR	4146	Bd21-3.CHH	Bd2	16198600	16198799	199	hyper	0	0.75	1	NA	1	NA	1	0.533333	0.25	0.75	NA	1	0.5	0.666667	0.0454545	0.309859	0	NA	0.242424	0	0.15
CHHDMR	4152	Bd21-3.CHH	Bd2	16384300	16384499	199	hypo	0	0.782609	0.852459	NA	0.972477	NA	0.993007	0	0.924528	1	NA	0.94697	NA	0.942529	0.225806	0	0.727273	NA	0.0571429	NA	0.293706
CHHDMR	4163	Bd21-3.CHH	Bd2	16686100	16686299	199	hypo	0.787611	0.959502	0.890411	0.965909	0.949333	0.650662	0.984085	0.298295	0.59322	0.531915	0.435407	0.862069	0.330171	0.736301	0.12532	0	0.339964	0.0204778	0.0114286	0.244983	0.0273556
CHHDMR	4183	Bd21-3.CHH	Bd2	17235500	17235699	199	hypo	0.0454545	0.0952381	0.733333	NA	0	0	0.0833333	0	0	0.638889	NA	0	0	0	0	0.0204082	0.32	NA	0.342105	0	0.166667
CHHDMR	4242	Bd21-3.CHH	Bd2	18559600	18559799	199	hypo	0	0.818182	1	1	1	1	0.571429	0.25	0.181818	1	0	0	0	0	0.00990099	0	0.80597	0	0.11	0	0
CHHDMR	4272	Bd21-3.CHH	Bd2	19513300	19513499	199	hypo	0.96679	0.958231	0.987654	0.930612	0.983333	0.953795	0.935354	0.261538	0.581633	0.857143	0.58	0.842105	0.524752	0.607843	0	0.0380952	0.553191	0.0289855	0	0.0560748	0
CHHDMR	4342	Bd21-3.CHH	Bd2	20841500	20841699	199	hypo	1	0.857143	1	NA	1	1	1	0.5625	0.8	1	NA	0	NA	0	0.0967742	0.0151515	0.740741	NA	0.4	0.5	0.0638298
CHHDMR	4402	Bd21-3.CHH	Bd2	21735000	21735199	199	hypo	0.973684	0.928571	0.972222	1	0.909091	0.642857	0.766667	0.421053	0	0.90566	0.666667	0.0714286	0.2	0.142857	0.0554493	0	0.211039	0.077961	0.0361446	0.0348837	0.0526316
CHHDMR	4408	Bd21-3.CHH	Bd2	21811300	21811499	199	hypo	0	0.69697	0.8	1	0	0.6	0.767442	0.0333333	0.380952	0.37037	0.666667	0	0.390625	0.36	0	0.028169	0.35	0	0	0.173913	0.198675
CHHDMR	4434	Bd21-3.CHH	Bd2	22191500	22191699	199	hypo	0.913043	0.951456	0.684211	0.461538	0.735294	0.760563	0.685185	NA	0.726027	0.363636	0.428571	0.322581	0.311111	0.181818	0.383378	0.00694444	0.335443	0.393939	0.241901	0.255578	0.270463
CHHDMR	4436	Bd21-3.CHH	Bd2	22210100	22210299	199	hypo	0.428571	0.886364	1	0.863636	0.9375	0.780488	1	0.703704	0.809524	0.871795	0.941176	0.702479	0.616	0.743363	0.15942	0.0176991	0.40404	0.16	0.0694444	0.130435	0.246269
CHHDMR	4493	Bd21-3.CHH	Bd2	23357100	23357299	199	hypo	0	0.0117647	0	0.0322581	0.0148148	0	0	0	0	0	0	0	0	0	0	0.015873	0.313131	0	0	0	0
CHHDMR	4498	Bd21-3.CHH	Bd2	23422700	23422899	199	hypo	NA	NA	0.941176	1	0.978723	0.965517	1	0.939286	0.958848	0.946565	0.939516	0.900369	0.919908	0.935185	0.193939	0.0121457	0.415094	0	0	0.020979	0.117021
CHHDMR	4500	Bd21-3.CHH	Bd2	23511900	23512099	199	hyper	NA	NA	NA	NA	NA	NA	NA	0.896552	0.841463	0.9	1	1	0.85	0.821429	0.110294	0.346939	0.0229885	0.109375	0.0384615	0.207447	0.0482759
CHHDMR	4512	Bd21-3.CHH	Bd2	23822400	23822599	199	hypo	1	1	0.941176	0.75	0.931034	1	1	0.666667	0.784314	0.763158	1	0.660377	0.814815	0.826087	0.0884956	0.0328638	0.401575	0	0.280702	0.397959	0.0280374
CHHDMR	4522	Bd21-3.CHH	Bd2	24090300	24090499	199	hyper	0.375	1	1	0.75	0.875	0.970588	1	0.363636	0.242424	0.842105	0.142857	0.194444	0.354167	0.1875	0	0.323864	0.0175439	0.0723684	0.0178571	0.118812	0.114865
CHHDMR	4528	Bd21-3.CHH	Bd2	24254300	24254499	199	hypo	0.970803	0.985816	0.957447	0.942029	0.989583	0.950704	1	0.653061	0.691667	0.87037	0.853333	0.847826	0.666667	0.771186	0.0329218	0.0112782	0.213592	0.121212	0.0578947	0.0384615	0.0656934
CHHDMR	4553	Bd21-3.CHH	Bd2	24724100	24724299	199	hypo	0.977221	0.987931	0.995927	0.993407	0.984187	0.984887	0.987352	0.31	0.336538	0.814607	0.865559	0.680785	0.798969	0.856838	0.0324232	0.00720721	0.583573	0.509591	0.217626	0.250528	0.493529
CHHDMR	4561	Bd21-3.CHH	Bd2	24813800	24813999	199	hyper	0.956522	0.972222	0.947368	1	0.971014	0.978723	0.977273	0.838983	0.86722	0.893939	0.938776	0.942478	0.814465	0.879599	0.115983	0.223181	0.0163934	0.0241692	0.010142	0.184669	0.214953
CHHDMR	4589	Bd21-3.CHH	Bd2	25365000	25365199	199	hypo	1	0.975472	0.993827	0.978632	0.984348	0.972222	0.9632	0.444444	0.682692	0.89916	0.682779	0.844186	0.809211	0.375315	0.0722892	0.0352941	0.252809	0.00465116	0.015456	0.0232198	0.0224359
CHHDMR	4591	Bd21-3.CHH	Bd2	25535000	25535199	199	hyper	0.923077	1	0.875	1	1	1	0.736842	0.375	0.666667	0.4	0.666667	0.142857	0.222222	0.666667	0.0634921	0.368421	0.0106383	0	0	0.207547	0.0675676
CHHDMR	4605	Bd21-3.CHH	Bd2	25830600	25830799	199	hypo	0.965517	0.945946	1	0.892857	0.953488	0.948718	0.990741	0.809524	0.857143	0.75	0.904762	0.903226	0.966667	0.883117	0	0.0169492	0.318182	0.190476	0.0535714	0.283333	0.0753425
CHHDMR	4608	Bd21-3.CHH	Bd2	25897400	25897599	199	hypo	0.847222	0.949153	0.962963	1	0.962264	0.931507	1	0.684211	0.5	0.555556	0.5	0.642857	0.555556	0.809524	0.0754717	0.0341463	0.325	0.12	0.25	0.011236	0.0983607
CHHDMR	4612	Bd21-3.CHH	Bd2	25982100	25982299	199	hypo	0.897196	0.409091	0.813187	0.741935	0.1	0.470588	0.933333	0.651786	0.0357143	0.686275	0.476923	0.1	0.27907	0.625	0.206049	0.00884956	0.318182	0.118852	0.0108696	0.0603448	0.0798479
CHHDMR	4617	Bd21-3.CHH	Bd2	26011600	26011799	199	hypo	0.974194	0.876847	0.989011	0.875	0.876761	0.886121	0.819355	0.464789	0.625	0.614458	0.686567	0.758865	0.748092	0.803571	0.0669856	0.0268456	0.354839	0.012987	0.0376344	0.392739	0.268398
CHHDMR	4634	Bd21-3.CHH	Bd2	26464500	26464699	199	hyper	0.970696	0.8	1	0.961538	0.666667	0.642857	0.785714	0.661765	0.75	0.757576	0.666667	0.727273	0.588235	0.804878	0.028754	0.268293	0.0116279	0.0666667	0.0555556	0.108696	0.15
CHHDMR	4641	Bd21-3.CHH	Bd2	26544600	26544799	199	hyper	0.771084	0.503497	0	0.658537	0	0.666667	0.719298	0.237288	0.214286	0.0909091	0.575758	NA	0.395833	0.4	0.105417	0.301609	0.0253165	0.272727	0	0.315534	0.140036
CHHDMR	4670	Bd21-3.CHH	Bd2	27124400	27124599	199	hypo	0.378378	0.777778	0.481481	NA	1	0.9	0.485294	0.333333	0.8	0.6	NA	0.4	0.625	0.5	0.185792	0.0294118	0.540741	NA	0	0.0333333	0.26799
CHHDMR	4741	Bd21-3.CHH	Bd2	28863300	28863499	199	hyper	1	1	1	NA	1	NA	1	0	0.25	0	NA	0	NA	0.2	0	0.267123	0.0309278	NA	0.285714	NA	0.0675676
CHHDMR	4792	Bd21-3.CHH	Bd2	29788100	29788299	199	hypo	1	0.971014	0.992908	1	0.965174	0.875	0.976891	0.709091	0.633987	0.76	0.75	0.878788	0.333333	0.745856	0	0.0254545	0.564103	0.4	0.0416667	0	0.352785
CHHDMR	4796	Bd21-3.CHH	Bd2	29956400	29956599	199	hypo	0.945946	1	1	NA	1	1	0.837838	0.78	0.875	0.9	NA	0.823529	0.789474	0.795918	0.0106838	0.028103	0.27957	0	0.0512821	0.0682927	0.019943
CHHDMR	4838	Bd21-3.CHH	Bd2	31050300	31050499	199	hypo	0.857143	1	1	1	1	0.666667	1	0	0	0	NA	0	0	0	0.117021	0.0181818	0.270833	0.352941	0.102564	0.0952381	0.103774
CHHDMR	4850	Bd21-3.CHH	Bd2	31344000	31344199	199	hypo	0.958333	1	0.882353	1	1	0.925	0.866667	0.636364	0.375	0.761905	0.727273	0.407407	0.702703	0.52381	0.0458716	0	0.2625	0.384615	0.235294	0.53125	0.414894
CHHDMR	4953	Bd21-3.CHH	Bd2	33557200	33557399	199	hypo	0.975728	0.974545	0.912752	0.5	0.884774	0.910615	0.863799	0.962687	0.956522	0.902439	0.5	0.757576	0.833333	0.807143	0.110638	0.0283401	0.25641	0	0.163043	0.114504	0.0990099
CHHDMR	4962	Bd21-3.CHH	Bd2	33913100	33913299	199	hypo	0.666667	0.928571	1	NA	1	1	NA	0	0.565217	0.8	NA	0.333333	0	NA	0	0.00909091	0.375	NA	0	0	0
CHHDMR	4965	Bd21-3.CHH	Bd2	33978100	33978299	199	hypo	0	0	NA	NA	NA	NA	NA	0	0.444444	0.545455	0	0	0	0	0	0.0272727	0.235772	0.136364	0	0.04	0.0588235
CHHDMR	4994	Bd21-3.CHH	Bd2	34762800	34762999	199	hypo	0.985386	0.952978	1	1	0.97037	0.956229	0.976562	0.823529	0.719298	0.808511	NA	0.813084	0.715596	0.782178	0.0182927	0.0179641	0.375	0	0.0769231	0	0.0272109
CHHDMR	4998	Bd21-3.CHH	Bd2	34813000	34813199	199	hypo	0.756098	0.707317	0.96875	1	1	0.818182	0.807692	0.235294	0.047619	1	NA	0.25	0.142857	0.333333	0.0559441	0.0175439	0.227273	0.04	0	0.0421053	0.195876
CHHDMR	5017	Bd21-3.CHH	Bd2	35161300	35161499	199	hypo	1	0.9375	1	1	0.972973	0.884615	0.934783	0	0	0	0	0	0	0	0.0192308	0.013986	0.389831	0.276923	0.167401	0.154286	0.235294
CHHDMR	5031	Bd21-3.CHH	Bd2	35468600	35468799	199	hyper	0.941176	0.888889	1	0.888889	NA	0.818182	0.982609	0.690476	0.652174	0.701754	0.714286	NA	0.612245	0.661654	0.0287356	0.266667	0.012605	0.0697674	NA	0.0229885	0.0268041
CHHDMR	5049	Bd21-3.CHH	Bd2	35851000	35851199	199	hypo	0.882353	0.947471	0.994186	0.747368	0.768116	0.945946	0.973868	0	0.594444	0.797297	0.37931	0.472222	0.333333	0.740458	0	0	0.704846	0.0113636	0	0	0.614035
CHHDMR	5079	Bd21-3.CHH	Bd2	36527400	36527599	199	hypo	1	0.982533	0.989691	0.982866	0.967213	0.980603	0.989967	0.692308	0.741573	0.861244	0.843552	0.862348	0.842105	0.769481	0.264516	0.0119048	0.49359	0.325	0.533333	0.364653	0.704607
CHHDMR	5104	Bd21-3.CHH	Bd2	37034600	37034799	199	hypo	0.75	0.941176	0.928571	1	NA	1	0.833333	0.25	0.307692	0.6	1	NA	0.769231	0	0.010989	0	0.270833	0.428571	NA	0.0166667	0
CHHDMR	5131	Bd21-3.CHH	Bd2	37576400	37576599	199	hypo	NA	NA	NA	NA	NA	NA	NA	0	1	1	1	0.714286	0.8	1	0	0.0186916	0.384615	0	0.108696	0.179487	0
CHHDMR	5139	Bd21-3.CHH	Bd2	37666700	37666899	199	hypo	0.526316	1	1	NA	1	1	NA	0	0.666667	0.538462	NA	0	0	NA	0.0260417	0.0208333	0.303922	NA	0.75	0	0
CHHDMR	5150	Bd21-3.CHH	Bd2	37827200	37827399	199	hypo	NA	0	0.833333	NA	0	0.2	NA	0.5	0	0.393939	NA	0.133333	0.0810811	0	0.428571	0.00980392	0.333333	0	0.146341	0.0236486	0.125
CHHDMR	5165	Bd21-3.CHH	Bd2	38063200	38063399	199	hypo	0.139535	0.317073	0.7	0.48	0.388889	0	0.364583	0.0461538	0	0.25	0	0.1875	0	0.139535	0.05625	0.016129	0.444444	0.142857	0.08	0	0.182292
CHHDMR	5171	Bd21-3.CHH	Bd2	38218200	38218399	199	hypo	0.843972	0.97027	0.978947	0.954198	0.918429	0.946154	0.973333	0.605634	0.603093	0.681034	0.633094	0.547826	0.583333	0.72	0.0611111	0.020202	0.421941	0.0583756	0.284165	0.304348	0.263666
CHHDMR	5173	Bd21-3.CHH	Bd2	38253900	38254099	199	hypo	0.807692	0	0.714286	0.652174	0	0.695652	0.645161	0.5	0	0.471429	0.846154	0	0.48	0.384615	0.196891	0	0.42233	0.257692	0	0.282528	0.145078
CHHDMR	5210	Bd21-3.CHH	Bd2	39121800	39121999	199	hypo	0.448276	0.333333	0.875	0.222222	0.681818	0.533333	0.4	0.0555556	0	0	0	0.111111	0.2	0.111111	0.0361446	0.00980392	0.391892	0.126214	0.393365	0.324074	0.0625
CHHDMR	5226	Bd21-3.CHH	Bd2	39381100	39381299	199	hyper	0.861111	0.972222	0.973684	0.888889	0.412214	0	0.955	0.716279	0.815789	0.825301	0.875	0.644599	1	0.765281	0.0060423	0.256039	0.0166667	0	0.00462963	NA	0.071298
CHHDMR	5230	Bd21-3.CHH	Bd2	39461100	39461299	199	hypo	0.666667	1	1	NA	1	NA	1	0	0.25	0.75	NA	0.5	NA	0.142857	0	0	0.318182	NA	0	NA	0
CHHDMR	5233	Bd21-3.CHH	Bd2	39535700	39535899	199	hypo	0.833333	0.047619	0.790323	0	0.0188679	NA	NA	1	0	0.555556	0	0	NA	NA	0.139535	0	0.344444	0	0	NA	NA
CHHDMR	5250	Bd21-3.CHH	Bd2	39981300	39981499	199	hyper	0.905263	0.976923	0.974359	0.99654	0.994269	0.984158	0.965293	0.761006	0.72	0.646154	0.606061	0.683673	0.58209	0.644809	0.266667	0.364929	0	0	0.0555556	0.506849	0.457627
CHHDMR	5254	Bd21-3.CHH	Bd2	40131900	40132099	199	hypo	0.94382	0.973684	0.985294	0.932	0.975439	0.962121	0.977157	0.73913	0.337209	0.9	0.830769	0.746667	0.734177	0.864	0.0161943	0.0337838	0.472973	0.00877193	0.0457516	0.0145631	0.236735
CHHDMR	5255	Bd21-3.CHH	Bd2	40142400	40142599	199	hyper	0.963636	0.5	1	1	1	0.982906	1	0.785714	0.533333	0.814815	0.954545	0.777778	0.78341	0.666667	0.0167224	0.345865	0.0234742	0.0267857	0.0102041	0.0371517	0
CHHDMR	5264	Bd21-3.CHH	Bd2	40373300	40373499	199	hypo	0.886792	0.945205	1	1	1	0.869048	0.564103	0.62069	0.576087	1	0.8	0.909091	0.642857	0.62963	0.0168067	0.0419463	0.272727	0.0380952	0.057377	0.00502513	0.204633
CHHDMR	5267	Bd21-3.CHH	Bd2	40467100	40467299	199	hypo	0.0693069	0.0578512	0.162162	0.0384615	0.0196078	0.291667	0.0952381	0.0425532	0	0.0535714	0	0.0470588	0.1875	0.021978	0.0136986	0	0.223404	0	0.0121212	0.125	0.0583942
CHHDMR	5271	Bd21-3.CHH	Bd2	40527000	40527199	199	hypo	0.9	0.985915	0.985915	0.8	0.932692	NA	0.939024	0.692308	0.666667	0.230769	0.333333	0.36	NA	0.756098	0.0119617	0.0145889	0.253247	0.149254	0.212682	NA	0.0222222
CHHDMR	5297	Bd21-3.CHH	Bd2	40990500	40990699	199	hypo	0.875	0.888889	0.75	NA	0.8	1	1	0.5	0.636364	0.916667	1	0.333333	0.809524	0.5	0.291667	0	0.402597	0	0.0666667	0.179856	0.0666667
CHHDMR	5340	Bd21-3.CHH	Bd2	41693600	41693799	199	hypo	1	1	0.6	1	0.777778	1	1	0.594203	0	0.642857	0	0.574468	0.333333	0.466667	0.114035	0	0.296	0.0645161	0.174419	0.0338983	0.1375
CHHDMR	5350	Bd21-3.CHH	Bd2	41842300	41842499	199	hypo	0.921569	0.966667	1	1	1	1	1	0.833333	0.555556	0.857143	0.833333	0.888889	0.6875	0.666667	0.0298507	0.025974	0.315789	0	0	0.0361446	0.030303
CHHDMR	5352	Bd21-3.CHH	Bd2	41861100	41861299	199	hypo	0.952941	1	1	1	0.925234	NA	1	1	NA	0	NA	0	NA	NA	0.178218	0	0.279605	0.0666667	0.24711	NA	0.011236
CHHDMR	5357	Bd21-3.CHH	Bd2	41954900	41955099	199	hypo	0.916667	0.875	1	1	0.888889	1	1	0.833333	0	0.615385	0	1	0	0	0.158621	0	0.315068	0	0.571429	0.111111	0
CHHDMR	5359	Bd21-3.CHH	Bd2	41963900	41964099	199	hypo	0.819277	0.0759494	0.942029	0.962963	0.92437	0.767123	0.881579	0.151515	0.0294118	0.571429	0.375796	0.443925	0.331081	0.455285	0.0681818	0.0254777	0.245902	0.0194553	0.182891	0.106838	0.262136
CHHDMR	5370	Bd21-3.CHH	Bd2	42138100	42138299	199	hyper	0.98062	0.924433	0.979675	0.95614	0.964602	0.970213	0.940476	0.555556	0.660377	0.64	0.84	0.769231	0.666667	0.714286	0.0867347	0.346939	0.0135135	0.16129	0.027027	0.00862069	0.025
CHHDMR	5408	Bd21-3.CHH	Bd2	42735500	42735699	199	hyper	0.136364	0	0	0	0	0	0	0.0588235	0.166667	0.235294	0.111111	0.0434783	0.125	0.0526316	0.106796	0.258065	0.0238095	0.423841	0.211268	0.056	0
CHHDMR	5420	Bd21-3.CHH	Bd2	42958500	42958699	199	hypo	0.0194175	0.0431267	0.273885	0.183844	0.110132	0.0519481	0.0212766	0.0104895	0.00722022	0.175	0.163934	0.0394089	0	0.00784314	0.014881	0.00731261	0.261398	0.353448	0.0724299	0	0.00204082
CHHDMR	5477	Bd21-3.CHH	Bd2	44456100	44456299	199	hypo	0.714286	0.666667	0.75	NA	1	1	1	NA	0	0	1	0	0	NA	0.0179641	0	0.413793	0.238095	0.230769	0.0307692	0.139535
CHHDMR	5502	Bd21-3.CHH	Bd2	44978400	44978599	199	hyper	0	0.45614	0	0	0.545455	0.565217	0	0.0277778	0.5	0	0	0.534884	0.583333	0	0.00220751	0.401786	0	0.0147059	0.277075	0.252381	0.015
CHHDMR	5550	Bd21-3.CHH	Bd2	45890400	45890599	199	hypo	0.82	0.641509	0.878788	1	0.783784	0.791667	0.722222	0	0.125	0	0.333333	0.333333	0.5	0	0.0891473	0.0150376	0.44375	0	0.0695187	0.125	0.209059
CHHDMR	5683	Bd21-3.CHH	Bd2	48609000	48609199	199	hypo	0.960452	0.930818	0.992991	0.972015	0.97931	0.97542	0.966175	0.624665	0.665217	0.876106	0.831169	0.827586	0.820738	0.842605	0.0893099	0.00539084	0.211268	0.0106667	0.00406504	0.162903	0.214848
CHHDMR	5758	Bd21-3.CHH	Bd2	50236300	50236499	199	hypo	0.920792	0.985861	0.988889	0.984783	0.979564	0.971645	0.985447	0.825137	0.791429	0.771739	0.838384	0.890855	0.742222	0.740991	0.0316206	0.0153453	0.457516	0.0347222	0.00724638	0.004329	0.26138
CHHDMR	5767	Bd21-3.CHH	Bd2	50373700	50373899	199	hypo	0.966368	0.965844	1	0.8	0.987976	0.986683	0.793617	0.714286	0.894081	0.8	0.958333	0.887681	0.861423	0.863799	0.140562	0	0.790698	1	0	0.457875	0.507937
CHHDMR	5770	Bd21-3.CHH	Bd2	50380400	50380599	199	hypo	1	1	1	1	NA	1	1	NA	NA	NA	NA	NA	NA	0.5	0.096	0	0.219731	0.923077	0	0.119048	0.0875
CHHDMR	5772	Bd21-3.CHH	Bd2	50441900	50442099	199	hypo	0.47619	0.5625	0.789474	0.837838	1	0.787879	0.807692	0.0933333	0.039604	0.612903	0.784483	0.814433	0.658228	0.321678	0.0169133	0.0350195	0.241294	0.264368	0.173375	0.287905	0.116883
CHHDMR	5792	Bd21-3.CHH	Bd2	50739300	50739499	199	hypo	0.172727	0.0927835	0.267857	0.30303	0.5	0.192308	0.375	0.107143	0.0833333	0.1	0	0	0	0	0.0465116	0.0361991	0.274809	0.12	0.175	0.0285714	0.186047
CHHDMR	5836	Bd21-3.CHH	Bd2	52132200	52132399	199	hypo	1	0	0	NA	NA	0.333333	1	0.5	0	0.333333	NA	0	0.4	0.625	0.391304	0	0.463415	NA	NA	0.133333	0.536082
CHHDMR	5886	Bd21-3.CHH	Bd2	53815900	53816299	399	hypo	0	0.0147059	0.840336	NA	0	0.285714	0	0.0172414	0.0238095	0.58209	0.25	0	0.0921053	0	0.004	0	0.289256	0	0	0.019685	0
CHHDMR	5887	Bd21-3.CHH	Bd2	53822100	53822299	199	hypo	0	0	0.666667	0	0	0	0.111111	0.0192308	0.037037	0.666667	0	0	0	0.125	0.015625	0	0.343949	0.010101	0.0129032	0	0
CHHDMR	5907	Bd21-3.CHH	Bd2	54337900	54338099	199	hypo	0.833333	0.75	0.777778	NA	0.857143	0.5	0.954545	0.225	0.611111	0.909091	NA	0.333333	0.5	0.8125	0	0.0297619	0.261364	NA	0.0444444	0.333333	0.0806452
CHHDMR	5921	Bd21-3.CHH	Bd2	54590200	54590399	199	hyper	1	1	1	1	1	1	1	0.368421	0.166667	0	0	0.0666667	0.5	0	0.18705	0.278351	0	0	0.263889	0	0.0454545
CHHDMR	5926	Bd21-3.CHH	Bd2	54716700	54716899	199	hyper	0.961977	0.876623	0.931034	1	0.969072	0.922261	0.95122	0.371257	0.402174	0.416667	0.533333	0.425926	0.54321	0.608392	0.235012	0.320463	0.0196078	0.319588	0.3	0.366995	0.275325
CHHDMR	5938	Bd21-3.CHH	Bd2	54944600	54944799	199	hypo	0.777778	0	0.733333	0	0.767442	NA	NA	0.176471	0	0.576923	NA	0.488372	NA	NA	0.138122	0.0136986	0.348837	0	0.171329	0	NA
CHHDMR	5949	Bd21-3.CHH	Bd2	55226800	55226999	199	hypo	0.960265	0.987342	0.966667	0.96748	0.96732	0.968254	0.995575	0.5	0.826087	1	0.818182	0.555556	0.76	0.755102	0.382857	0.0167598	0.433333	0	0	0.0144928	0.269058
CHHDMR	5977	Bd21-3.CHH	Bd2	56042700	56042899	199	hypo	0.83871	0.490196	0.9	0.9375	0.9	0.773585	0.615385	0.25	0.111111	0.5	NA	NA	0.142857	0	0.126761	0.0315789	0.636364	0.315789	0.181818	0.165	0.2125
CHHDMR	5999	Bd21-3.CHH	Bd2	56719900	56720099	199	hypo	0	0	0	0	0	0.333333	0	0	0	NA	0	0	0	0	0.0245902	0.0291971	0.280303	0.121951	0.285714	0.470588	0.293194
CHHDMR	6006	Bd21-3.CHH	Bd2	56904200	56904399	199	hypo	NA	1	1	NA	NA	1	1	NA	0.6	0.5	NA	NA	NA	NA	0	0	0.479167	0	0	0	0
CHHDMR	6016	Bd21-3.CHH	Bd2	57164700	57164899	199	hypo	0.5125	0.474576	0.690476	0.545455	0.521739	0.366667	0.615385	0.777778	1	0.8	0	NA	0.5	1	0.163793	0.0373444	0.274648	0.0759494	0.128205	0.171429	0.126761
CHHDMR	6081	Bd21-3.CHH	Bd2	58888300	58888499	199	hyper	0.956332	0.852657	0.959677	0.985294	0.909502	0.943038	0.950739	0.572327	0.481651	0.747748	0.834586	0.677273	0.882812	0.641791	0.338095	0.27163	0.037594	0.118993	0.316	0.0932203	0.073955
CHHDMR	6093	Bd21-3.CHH	Bd2	59285700	59285899	199	hyper	1	0.8	0	NA	0.666667	0.5	0.714286	0.826087	0.833333	0.666667	NA	0.777778	0.642857	0.769231	0.298701	0.203125	0	NA	0.283019	0.305085	0.391892
CHHDMR	6103	Bd21-3.CHH	Bd3	294600	294799	199	hypo	NA	NA	NA	NA	NA	NA	NA	NA	0	1	NA	NA	NA	NA	0.0376344	0	0.214286	0.692308	0.1	0.171429	0.326087
CHHDMR	6126	Bd21-3.CHH	Bd3	1059600	1059799	199	hypo	0.981132	0.903509	0.983696	0.986641	0.919476	0.98892	0.985714	0.681818	0.73545	0.764286	0.82439	0.770455	0.77918	0.717986	0.658537	0.0192308	0.330579	0.0410959	0.0227273	0.200514	0.437821
CHHDMR	6157	Bd21-3.CHH	Bd3	1623500	1623699	199	hypo	0.482759	0.481481	0.714286	0.26087	0.521739	0.238095	0.458333	0.111111	0	0.380952	0.125	0.391304	0.166667	0.214286	0.16129	0.0403226	0.573643	0.195876	0.491803	0.188034	0.254054
CHHDMR	6171	Bd21-3.CHH	Bd3	1999100	1999299	199	hyper	1	0.390625	1	1	0.428571	0.961538	0.970874	0.757576	0.449275	0.833333	0.636364	0.5	0.831579	0.866667	0	0.442029	0	0	0	0.00892857	0.0138889
CHHDMR	6187	Bd21-3.CHH	Bd3	2293600	2293799	199	hypo	0	0.333333	0.375	0.9	0.25	0	0.366667	0	0	0.2	0.307692	0.125	0	0.181818	0	0	0.45	0.556818	0.491803	0.75	0.496732
CHHDMR	6192	Bd21-3.CHH	Bd3	2505500	2505699	199	hypo	NA	0	0.318182	0	0.136364	NA	0	0	0.011236	0.12766	0	0.12	NA	0	0	0.0149254	0.271186	0	0.0491803	NA	0
CHHDMR	6202	Bd21-3.CHH	Bd3	2798200	2798399	199	hypo	0	0.02	0.672131	NA	0.777778	0.957746	0.776786	0	0	0.407407	NA	0.696429	0.715517	0.697674	0.00775194	0	0.496454	NA	0.297521	0.586103	0.328622
CHHDMR	6233	Bd21-3.CHH	Bd3	3431200	3431399	199	hypo	0.972973	0.964912	1	NA	0.857143	1	0.954545	0.333333	0.130435	0.272727	NA	0.5	0.0625	0.333333	0.0714286	0.0292683	0.260504	NA	0.0746269	0.0285714	0.172414
CHHDMR	6287	Bd21-3.CHH	Bd3	4625900	4626199	299	hypo	0.486667	0.0178571	0.7	0	0.519685	0.0322581	0	0.177083	0	0.40404	0	0.246667	0	0	0.00390625	0.00294118	0.282878	0.025641	0.181985	0	0.0107527
CHHDMR	6289	Bd21-3.CHH	Bd3	4636600	4636799	199	hypo	0.48	1	0.9375	NA	0.636364	0.578947	1	0.0714286	NA	0.875	NA	0	1	NA	0.184397	0	0.539033	0.3125	0.354497	0.19305	0.375
CHHDMR	6300	Bd21-3.CHH	Bd3	4849600	4849999	399	hyper	0.904762	0.857143	0.848485	NA	0	NA	1	0.222222	0.777778	0.5625	NA	0	1	0.75	0.0196078	0.336898	0.0130435	0	0.0740741	0.04	0.0493827
CHHDMR	6350	Bd21-3.CHH	Bd3	5842100	5842299	199	hypo	0.962963	0.907692	0.984733	NA	0.909091	1	0.769231	0.727273	0.451613	0.88	NA	0	0.5	0.473684	0.384615	0	0.416667	NA	0	0.333333	0
CHHDMR	6356	Bd21-3.CHH	Bd3	6020600	6020799	199	hypo	0.962963	0.931818	1	1	0.888889	1	0.758621	0.7	0.294118	1	0.5	0.4	NA	0	0.131298	0.0168856	0.26506	0.100457	0.116379	0.133333	0.0690608
CHHDMR	6360	Bd21-3.CHH	Bd3	6158800	6158999	199	hypo	NA	0	0.7	NA	0	0	NA	1	0	0.363636	NA	0	0	NA	0.271318	0	0.446237	NA	0	0	0.334821
CHHDMR	6368	Bd21-3.CHH	Bd3	6304500	6304699	199	hyper	0.857143	0.6	0.857143	1	0.333333	NA	0.833333	0	0.75	1	NA	1	1	0.666667	0.0872483	0.273684	0.0333333	0.111111	0.333333	0.111111	0.06
CHHDMR	6372	Bd21-3.CHH	Bd3	6456000	6456199	199	hypo	0.938272	0.955357	1	0.954545	0.905172	0.983607	0.937888	0.70354	0.756849	0.823529	0.782051	0.861423	0.819188	0.756281	0.122951	0.0196629	0.563636	0.00546448	0.00384615	0.00680272	0.116638
CHHDMR	6382	Bd21-3.CHH	Bd3	6627700	6627899	199	hypo	0.966667	0.972509	0.986532	0.954545	0.972376	0.92196	0.97019	0.70418	0.759563	0.681818	0.875	0.803571	0.611111	0.803571	0.0857143	0	0.305085	0	0	0.0276498	0.627907
CHHDMR	6395	Bd21-3.CHH	Bd3	6800300	6800499	199	hypo	0.777778	0.693548	1	0.846154	1	0.928571	0.681818	0.5	0.652174	0.63	0.615385	0.333333	0.618785	0.704918	0.109091	0.0424242	0.322176	0.179487	0.0416667	0.164975	0.0925926
CHHDMR	6419	Bd21-3.CHH	Bd3	7264200	7264399	199	hypo	0.666667	0.980769	0.8	1	0.95	0.807692	0.944444	0.411765	0.744186	0.470588	0.8	0.653846	0.736842	0.862069	0.0465116	0.0167364	0.311475	0	0.0487805	0.128205	0.0384615
CHHDMR	6425	Bd21-3.CHH	Bd3	7384900	7385099	199	hypo	NA	NA	NA	NA	NA	NA	NA	NA	NA	NA	NA	NA	NA	NA	0.173913	0.023753	0.29	0.0333333	0.0357143	0.0704698	0.296117
CHHDMR	6451	Bd21-3.CHH	Bd3	7793200	7793399	199	hypo	0.0722892	0.0128205	0.724638	0.0555556	0.0289855	0.0882353	0.0526316	0.0384615	0	0.340426	0	0	0	0	0	0.00722022	0.21978	0	0	0	0
CHHDMR	6469	Bd21-3.CHH	Bd3	8067000	8067199	199	hypo	0.939252	0.848485	0.902439	0.923077	0.974359	0.888889	0.872	0.5	0.353659	0.6	0.5	0.700935	0.537736	0.585714	0.117293	0.00342466	0.391813	0.293478	0.18241	0.175644	0.178947
CHHDMR	6487	Bd21-3.CHH	Bd3	8257900	8258099	199	hypo	0.857143	0.972603	0.225806	0.0169492	0.0277778	0.0802469	0.043956	0.555556	0.556818	0.194444	0.0545455	0.113821	0.0463576	0.0564103	0	0	0.586207	0.102564	0.144509	0.157407	0.119691
CHHDMR	6501	Bd21-3.CHH	Bd3	8461600	8461799	199	hypo	0.953488	0.95	1	1	0.986842	0.934783	0.953846	0.702703	0.5	0.833333	0.571429	0.646154	0.745098	0.71831	0.0980392	0.0208333	0.273684	0.0948276	0.0240385	0.0884354	0.128302
CHHDMR	6506	Bd21-3.CHH	Bd3	8522900	8523099	199	hypo	0.962791	0.902475	0.987775	0.990635	0.985793	0.907738	0.965342	0.511278	0.690987	0.666667	0.752044	0.752315	0.574144	0.717895	0.00784314	0.0111732	0.427711	0.0243902	0.132013	0.0930851	0.362963
CHHDMR	6551	Bd21-3.CHH	Bd3	9315300	9315499	199	hyper	0.666667	0.444444	0.7	0.333333	0.357143	0.6	0.52381	0.636364	0.470588	0.363636	0.636364	0.5	0.8	0.40625	0.0121951	0.294872	0.0204082	0.113924	0.130435	0.155172	0.244444
CHHDMR	6565	Bd21-3.CHH	Bd3	9790000	9790299	299	hypo	0.6875	0.936508	0.930233	0.961039	1	0.917808	0.901099	0.8125	0.892857	0.924528	0.981481	0.947826	0.795918	0.77451	0.0419907	0.0270701	0.21308	0.0207254	0.145482	0.143062	0.0792181
CHHDMR	6569	Bd21-3.CHH	Bd3	9851900	9852099	199	hypo	1	1	1	0.75	0.947368	0.9375	1	0.666667	0.96	0.9375	0.888889	0.982143	0.980392	0.918919	0.101124	0.0357143	0.265823	0.166667	0.251852	0.0869565	0.125926
CHHDMR	6570	Bd21-3.CHH	Bd3	9919600	9919799	199	hyper	0.914141	0.991045	0.963855	0.896552	0.947368	0.972376	0.994118	0.618182	0.516667	0.411765	0.571429	0.611111	0.779661	0.75	0.61859	0.257009	0	0	0	0.253275	0.368421
CHHDMR	6574	Bd21-3.CHH	Bd3	10057700	10057899	199	hypo	0.714286	1	1	NA	NA	1	1	0.636364	0.863636	0.88	0.6	1	0.68	0.52	0.0526316	0	0.3625	0	0	0.145161	0.0740741
CHHDMR	6575	Bd21-3.CHH	Bd3	10074600	10074799	199	hypo	0.969697	0.955357	0.979167	0.897436	1	0.983871	0.981481	0.157895	0.202703	0.542857	0.315789	0.75	0.470588	0.253968	0.0645161	0.0119048	0.297872	0	0	0.0566038	0
CHHDMR	6656	Bd21-3.CHH	Bd3	12236600	12236799	199	hyper	NA	NA	NA	NA	NA	NA	NA	NA	NA	NA	NA	NA	NA	NA	0.105263	0.252505	0.013986	0.119403	0.203488	0.12766	0.202046
CHHDMR	6668	Bd21-3.CHH	Bd3	12409300	12409499	199	hypo	0	0	0	0.019802	0.00790514	0.00529101	0.0117647	0	0	0.0277778	0	0.0289855	0.0289855	0	0.0169492	0.00746269	0.340659	0	0	0	0.238095
CHHDMR	6688	Bd21-3.CHH	Bd3	13110600	13110799	199	hyper	0.0833333	0.5	0.980392	0.974359	0.980392	0.947368	0.974522	0	0.2	0.695652	0.533333	0.56	0.652174	0.728814	0	0.857143	0	0.0248447	0.0304569	0.00952381	0.00497512
CHHDMR	6763	Bd21-3.CHH	Bd3	14683400	14683599	199	hypo	0.875	0.875	0.9	1	1	0.75	1	0.142857	0.25	0	1	0.833333	0.2	0.0909091	0.0826211	0.0238095	0.393701	0.27907	0.176	0.169355	0.219653
CHHDMR	6771	Bd21-3.CHH	Bd3	14826400	14826599	199	hypo	0.853659	0.984848	0.986842	0.875	0.985222	0.946237	0.954023	0.7	0.692308	0.849057	0.7	0.676471	0.756757	0.57	0.18018	0.0208333	0.466102	0	0.0487805	0.0163934	0.306202
CHHDMR	6794	Bd21-3.CHH	Bd3	15469500	15469699	199	hypo	0.904762	0.957746	0.894737	1	1	0.947368	0.967742	0.45	0.380952	0.222222	0	0.5	0.6875	0.625	0.00917431	0.0178571	0.275862	0	0.0519481	0	0.0275229
CHHDMR	6804	Bd21-3.CHH	Bd3	15648900	15649099	199	hypo	0.888889	0.981343	0.979167	0.957219	0.962099	0.907104	0.933985	0.0958904	0.423237	0.824742	0.589888	0.699088	0.391667	0.375297	0	0.00259067	0.416667	0	0.00294118	0.326252	0.199774
CHHDMR	6835	Bd21-3.CHH	Bd3	16147700	16147899	199	hypo	0.968085	0.941176	0.974359	0.428571	1	0.777778	0.772152	0.655172	0.714286	0.615385	0.5	1	0.707317	0.657895	0.0406852	0.0204082	0.331461	0.0784314	0.268293	0.066092	0.180791
CHHDMR	6846	Bd21-3.CHH	Bd3	16332400	16332599	199	hypo	0.921875	0.95122	1	1	1	0.945455	0.96	0	0.0416667	0	1	0.0769231	0.0714286	0	0.00877193	0.0301205	0.234043	0	0	0.0075188	0.0186047
CHHDMR	6868	Bd21-3.CHH	Bd3	16758600	16758799	199	hypo	0.818182	0.515152	0.4375	0.875	0.848485	0.571429	0.666667	0.558824	0.194444	0.285714	0.571429	0.558824	0.272727	0.384615	0.12782	0.0154639	0.263889	0.130137	0.168182	0.0524194	0.0818713
CHHDMR	6912	Bd21-3.CHH	Bd3	17584600	17584799	199	hypo	0	0.0227273	0.191489	0	0.0526316	0	0	0	0.0166667	0.294118	0.0333333	0.0740741	0.0638298	0.0697674	0	0.00421941	0.273128	0	0	0	0.027972
CHHDMR	6915	Bd21-3.CHH	Bd3	17664200	17664399	199	hypo	0.5	1	0.6	NA	NA	1	0.8	1	0.642857	1	NA	NA	1	1	0	0.0377358	0.323529	NA	NA	0	0.0163934
CHHDMR	6936	Bd21-3.CHH	Bd3	18080000	18080199	199	hyper	0.814815	0.841772	1	0.852941	0.892857	0.761905	0.884615	0.2	0.696203	0.891304	0.711538	0.81746	0.576923	0.846847	0.00478469	0.47925	0.0408922	0.133515	0.0642722	0.0977778	0.207317
CHHDMR	6971	Bd21-3.CHH	Bd3	18706300	18706499	199	hypo	NA	0.964912	0.852941	1	1	1	0.953125	NA	0.75	0.692308	1	0.941176	0.952381	0.87234	NA	0.00363636	0.390805	0.0291262	0.0150754	0.0124224	0.020202
CHHDMR	6972	Bd21-3.CHH	Bd3	18707100	18707299	199	hypo	0.809524	0.962617	0.979695	0.928571	0.853333	0.925926	0.881119	0.55	0.397059	0.591667	0.535714	0.5	0.475177	0.431818	0	0.0091954	0.336406	0.0222222	0	0.0446097	0.0290909
CHHDMR	7002	Bd21-3.CHH	Bd3	19216400	19216599	199	hypo	0.0322581	0.010989	0	0	0.0143885	0.0136986	0	0.00961538	0.0103093	0.08	0	0	0.0285714	0.0185185	0.0135135	0	0.378378	0	0	0.0352941	0
CHHDMR	7009	Bd21-3.CHH	Bd3	19319000	19319199	199	hyper	0.76087	0.90625	0.9375	0.777778	0.774194	0.784314	0.888889	0.5	0.793103	0.8	0.166667	0.578947	0.52	0.5	0.185897	0.222222	0.0294118	0.363636	0.339806	0.118644	0.367742
CHHDMR	7096	Bd21-3.CHH	Bd3	21380400	21380599	199	hyper	0.857143	1	1	NA	0.833333	1	NA	0.571429	0.8	0.555556	NA	0.5	0.75	0.5	0.151751	0.295775	0.0243902	NA	0.415094	0.0697674	0.0714286
CHHDMR	7137	Bd21-3.CHH	Bd3	22182600	22182799	199	hypo	0.333333	0.142857	0.5	0.05	0	0.0769231	0.470588	0	0	0	0.114286	0	0.172414	0.0821918	0.0679012	0	0.354839	0.0444444	0	0.0898876	0.199525
CHHDMR	7141	Bd21-3.CHH	Bd3	22247600	22247799	199	hypo	0.84	0.971831	0.5	0.666667	1	0.190476	0.592593	0.768293	0.769231	0.5	0.545455	0.923077	0	0.422222	0.0318841	0.0215054	0.375	0.204082	0.102273	0.134328	0.173228
CHHDMR	7144	Bd21-3.CHH	Bd3	22265900	22266099	199	hypo	0.142857	0.378049	0.65	0.348837	0.285714	0.272727	0.378788	0	0	0	0.05	0	0	0	0.0337838	0.0236967	0.257143	0.0720721	0.0625	0.300699	0.115385
CHHDMR	7146	Bd21-3.CHH	Bd3	22268500	22268699	199	hypo	0.969863	0.985401	0.990453	0.951662	0.970297	0.976161	0.979925	0.604027	0.835294	0.523297	0.747826	0.94964	0.556277	0.59375	0.147445	0.00874636	0.303097	0.00484262	0	0.00913242	0.0819304
CHHDMR	7168	Bd21-3.CHH	Bd3	22801600	22801799	199	hypo	0.987952	0.978495	0.984252	0.945455	0.0263158	0.0151515	0.0368098	0.612069	0.761905	0.770115	0.911765	0	0.015873	0.0133333	0.0191083	0.0175439	0.329787	0	0	0.0235294	0
CHHDMR	7173	Bd21-3.CHH	Bd3	22912000	22912199	199	hypo	1	0.777778	1	NA	1	1	1	0.833333	0.857143	1	NA	1	0.4	1	0.0714286	0.0277778	0.545455	NA	0	0.1	0
CHHDMR	7176	Bd21-3.CHH	Bd3	22991300	22991499	199	hypo	0.967033	0.972973	1	1	1	1	1	0.807692	0.952381	1	1	1	0.96	1	0.0722222	0.0285714	0.293333	0.0131579	0.0229885	0.0396825	0.0925926
CHHDMR	7178	Bd21-3.CHH	Bd3	23098900	23099099	199	hypo	0.979592	0.964286	1	1	0.991071	0.862745	0.978261	0.644444	0.541667	1	NA	0.8	0.714286	0.75	0.0528512	0.015748	0.278571	0	0.0184564	0.00983607	0.0328767
CHHDMR	7187	Bd21-3.CHH	Bd3	23409600	23409799	199	hyper	0.981818	1	1	NA	1	0.944444	0.814815	0.8	0.904762	0.888889	NA	NA	0.666667	0.625	0	0.484848	0	NA	0	0	0
CHHDMR	7196	Bd21-3.CHH	Bd3	23874100	23874299	199	hypo	0.933594	0.921466	1	0.988235	0.995595	0.978723	0.94188	0.163934	0.382979	0.772727	0.4	0.283019	0.666667	0.253846	0.148148	0.00900901	0.675676	NA	NA	0.0430108	0.0921053
CHHDMR	7198	Bd21-3.CHH	Bd3	23920200	23920399	199	hypo	0.836957	0.910256	1	NA	0.978261	0.958904	0.952381	0.391304	0.365385	1	NA	0.583333	0.375	0.666667	0	0	1	NA	0	0	0
CHHDMR	7209	Bd21-3.CHH	Bd3	24358700	24358899	199	hypo	0.888889	1	1	NA	1	NA	1	0.705882	0.607143	0.857143	NA	0.833333	NA	0.75	0	0.0428571	0.225806	NA	0	NA	0.027027
CHHDMR	7222	Bd21-3.CHH	Bd3	24731600	24731799	199	hypo	1	1	1	NA	NA	NA	0	0.6	1	1	NA	NA	NA	NA	0.0436893	0	0.317073	NA	NA	NA	0
CHHDMR	7253	Bd21-3.CHH	Bd3	25583100	25583299	199	hypo	NA	0.483871	0.615385	NA	NA	NA	NA	0.333333	0.424242	0.4	0	1	NA	NA	0.227273	0.0275862	0.322581	NA	NA	NA	NA
CHHDMR	7274	Bd21-3.CHH	Bd3	26275000	26275199	199	hypo	0.967742	1	1	1	1	1	0.9375	0.888889	0.833333	1	NA	NA	0.666667	1	0.0434783	0.019802	0.310345	0	0	0.03125	0.0138889
CHHDMR	7281	Bd21-3.CHH	Bd3	26410200	26410399	199	hypo	1	1	1	1	1	0.917808	0.967742	0.768421	1	0.833333	0.65	0.923077	0.782609	0.866667	0.0134228	0.025	0.4	0.0227273	0	0.0135135	0.0276923
CHHDMR	7283	Bd21-3.CHH	Bd3	26419500	26419799	299	hypo	0.943662	0.982456	1	0.95	0.952381	0.930233	0.900709	0.298701	0.654545	0.578947	0.725	0.5	0.484375	0.535354	0.011236	0.0189573	0.253521	0.0352113	0.00892857	0.0245902	0.0508906
CHHDMR	7286	Bd21-3.CHH	Bd3	26552400	26552599	199	hypo	0.871795	0.298851	0.285714	0.5	0.777778	0.596154	0.403846	0.272727	0.190909	0.324324	0.227273	0.0869565	0.298246	0.169014	0.0756757	0.041791	0.3	0.275	0	0.125	0.0153061
CHHDMR	7295	Bd21-3.CHH	Bd3	26875600	26875799	199	hypo	0.971831	0.968254	0.959184	0.967742	0.952381	0.976744	0.924731	0.5	0.62963	0.797297	0.730769	0.696629	0.809524	0.658824	0.015444	0.00657895	0.224852	0	0	0.0171821	0.0132159
CHHDMR	7300	Bd21-3.CHH	Bd3	27025400	27025599	199	hypo	1	1	1	1	1	0.833333	1	0.75	1	1	0	1	1	1	0.0340136	0	0.222222	0	0.333333	0.115385	0.025641
CHHDMR	7375	Bd21-3.CHH	Bd3	28762500	28762699	199	hypo	0.971897	0.968085	0.972603	0.967391	0.97069	0.981013	0.982942	0.527607	0.70283	0.655172	0.276923	0.674797	0.62201	0.646067	0.138889	0.00465658	0.269639	0.00865801	0.0547264	0.0209497	0.118243
CHHDMR	7381	Bd21-3.CHH	Bd3	28843000	28843199	199	hypo	0.911111	0	0.95	0.666667	0.8	0.916667	0.142857	1	0	0.722222	0	1	0.75	0	0.0252809	0	0.25	0.117647	0.307692	0	0.262295
CHHDMR	7407	Bd21-3.CHH	Bd3	29414000	29414199	199	hypo	0.967213	0.960526	1	1	1	0.777778	0.943182	0.603448	0.5625	0.652174	0.666667	0.166667	0	0.245283	0	0.0316456	0.414062	0	0	0.309524	0.0805369
CHHDMR	7411	Bd21-3.CHH	Bd3	29567100	29567299	199	hypo	0.841584	0.743169	0.892308	0.484848	0.529412	0.815476	0.586207	0.445455	0.380952	0.62069	0.333333	0.571429	0.372881	0.260274	0.135734	0.0060241	0.43	0.0138889	0.025	0.0666667	0.0164609
CHHDMR	7437	Bd21-3.CHH	Bd3	30055800	30055999	199	hyper	0.625	0.8	0.95	0.666667	0.777778	0.368421	0.753247	0.227723	0.607955	0.931034	0.5	0.610169	0.263158	0.338346	0.128852	0.412548	0	0.44697	0.237624	0.172185	0.253731
CHHDMR	7454	Bd21-3.CHH	Bd3	30387200	30387399	199	hypo	0.950521	0.974239	0.992647	0.991379	0.97	0.965879	0.979221	0.644531	0.630252	0.789062	0.822581	0.751055	0.689139	0.698113	0.0920097	0.0213777	0.477064	0.529412	0.0506912	0.0433333	0.0955056
CHHDMR	7456	Bd21-3.CHH	Bd3	30391400	30391699	299	hyper	0.952756	0.955882	0.979167	0.957386	0.98615	0.974874	0.967655	0.587302	0.562249	0.617021	0.637131	0.690476	0.646617	0.605469	0.139098	0.256991	0.0335821	0.26506	0.309353	0.219721	0.203352
CHHDMR	7466	Bd21-3.CHH	Bd3	30672600	30672799	199	hyper	0.992366	0.984293	0.95122	0.990099	0.982143	0.985294	0.909091	0.893617	0.870968	0.701149	0.771186	0.925373	0.848	0.848315	0.325	0.4	0	0.025974	0.0466667	0.278912	0.547126
CHHDMR	7500	Bd21-3.CHH	Bd3	31192300	31192499	199	hypo	0.91863	0.91863	0.986301	0.987879	0.957447	0.964789	0.975877	0.686391	0.530364	0.6875	0.823529	0.8125	0.697479	0.5625	0.0976744	0.00462963	0.33	0	0	0	0.012
CHHDMR	7509	Bd21-3.CHH	Bd3	31318100	31318299	199	hyper	0.4	0.463415	0.697368	0.714286	0.764706	0.584071	0.723926	0.121212	0.289474	0.191781	0.148148	0.393939	0.227723	0.135135	0.0144928	0.241935	0.0126582	0	0.0727273	0.0357143	0.0153374
CHHDMR	7510	Bd21-3.CHH	Bd3	31319100	31319299	199	hypo	1	1	1	1	1	0.857143	1	0.815789	0.952381	1	1	0.888889	0.772727	0.818182	0.0149254	0.0243902	0.375	0.0652174	0.162162	0.0679012	0.157576
CHHDMR	7511	Bd21-3.CHH	Bd3	31319900	31320099	199	hypo	0.970149	0.981481	0.918033	1	1	0.981651	0.950355	0.658436	0.774194	0.439394	0.906977	0.728682	0.617391	0.706349	0.0292308	0.012605	0.281879	0.173077	0.0512821	0.0252366	0.0342857
CHHDMR	7533	Bd21-3.CHH	Bd3	31769300	31769499	199	hyper	0.574879	0.561856	0.981481	0.966667	0.964286	0.973585	0.969419	0.45815	0.559471	0.774194	0.768657	0.733945	0.64881	0.754545	0.424012	0.5804	0.0209524	0.0372272	0.0465929	0.0210728	0.0215727
CHHDMR	7535	Bd21-3.CHH	Bd3	31817800	31817999	199	hyper	NA	NA	NA	NA	NA	NA	NA	0.473684	0.5	1	1	1	0.785714	0.909091	0.19802	0.524272	0.0246914	0.140187	0.0980392	0.190909	0.141026
CHHDMR	7537	Bd21-3.CHH	Bd3	31879500	31879699	199	hypo	NA	1	1	1	0	1	0	0	0.7375	0.923077	0.789474	0.840909	0.916667	0.758621	0	0.0205128	0.459016	0.12	0.0652174	0.346405	0.173913
CHHDMR	7587	Bd21-3.CHH	Bd3	33133200	33133399	199	hypo	0.714286	0	0.5	NA	0	0.25	0	0.766667	0.576471	0.627451	0	0.5	0.354839	0.354167	0.090411	0.0272277	0.234234	0	0.0218579	0	0.041543
CHHDMR	7588	Bd21-3.CHH	Bd3	33144800	33144999	199	hypo	0.15	0	0.913793	0	0	0.786517	0	0.125	0	0.454545	0	0	0.523077	0	0.0178571	0.0157068	0.294118	0	0	0.213836	0.011236
CHHDMR	7591	Bd21-3.CHH	Bd3	33236600	33236799	199	hyper	0.975248	0.981982	0.971154	0.97561	0.978182	0.97619	0.968379	0.672897	0.834437	0.783133	0.845	0.834101	0.746667	0.780255	0.0162602	0.217082	0.0168067	0.0196078	0.158416	0.00598802	0.00921659
CHHDMR	7606	Bd21-3.CHH	Bd3	33843300	33843599	299	hypo	1	0.981818	1	1	0.978723	1	0.986111	0.111111	0.809524	0.416667	0.545455	0.612903	0.609756	0.541667	0.25641	0.0365854	0.407407	0.15528	0.30273	0.308511	0.0683453
CHHDMR	7628	Bd21-3.CHH	Bd3	34298600	34298799	199	hypo	NA	1	1	1	1	NA	1	0.857143	0.875	1	NA	0.4	0.818182	0.666667	0.190476	0.0181818	0.519231	0.142857	0.255319	0	0.020202
CHHDMR	7635	Bd21-3.CHH	Bd3	34469300	34469499	199	hyper	0.959108	0.95045	0.956522	0.97807	0.978261	0.963415	0.964088	0.735294	0.85	0.777778	0.940678	0.945652	0.853659	0.889764	0.533708	0.248588	0.0306122	0.108434	0.0322581	0	0.432258
CHHDMR	7640	Bd21-3.CHH	Bd3	34570200	34570399	199	hyper	0.857143	0.928571	1	NA	1	1	0.75	0.666667	0.7	0.8125	NA	0.833333	0.666667	0.571429	0	0.266667	0	NA	0.166667	0.0645161	0
CHHDMR	7655	Bd21-3.CHH	Bd3	34779400	34779699	299	hypo	0.272727	0.972973	0.833333	0.428571	0.166667	0.4	0.428571	0.52381	0.864865	0.727273	1	0	0.166667	0.5	0.025641	0.0205761	0.533333	0	0	0.125	0.285714
CHHDMR	7658	Bd21-3.CHH	Bd3	34806500	34806699	199	hypo	0.952055	0.916168	1	1	0.666667	0.916667	0.941176	0.0606061	0.432099	0.434783	1	0.8	0	0.142857	0.07	0	0.538462	0	0	0	0.0555556
CHHDMR	7659	Bd21-3.CHH	Bd3	34839600	34839799	199	hypo	0.894737	1	1	0.941176	0.956522	1	1	0.741935	0.571429	0.833333	0.833333	0.666667	0.111111	1	0.0704225	0.0172911	0.251282	0.251497	0.343284	0.135294	0.00425532
CHHDMR	7662	Bd21-3.CHH	Bd3	35019300	35019699	399	hypo	0.795276	0.816327	0.970037	0.994118	0.982759	0.975124	0.960613	0.782609	0.842105	0.939516	0.892216	0.894231	0.923977	0.87907	0.0344828	0.0136054	0.317909	0.155738	0.145733	0.278422	0.15404
CHHDMR	7670	Bd21-3.CHH	Bd3	35184900	35185099	199	hyper	1	1	1	1	1	1	1	1	1	0.4	1	1	0.714286	1	0.0172414	0.318841	0.031746	0	0.0884956	0.0140845	0.0375
CHHDMR	7696	Bd21-3.CHH	Bd3	35676900	35677099	199	hypo	0.806122	0.986111	1	0.923077	0.971429	0.769231	1	0.602564	0.727273	0.727273	1	0.823529	0.75	0.833333	0.0190931	0.0278884	0.225352	0.097561	0.0192308	0.00840336	0.0531915
CHHDMR	7700	Bd21-3.CHH	Bd3	35748200	35748399	199	hypo	0.47619	0	0.854839	0.222222	0.797101	0.782609	0.85	0.0384615	0	0.346939	0	0.344262	0.508475	0.413043	0.11879	0.0135135	0.319559	0.0947368	0.381176	0.306346	0.409611
CHHDMR	7725	Bd21-3.CHH	Bd3	36198700	36198899	199	hyper	1	1	0.944444	1	1	0.863636	1	0.785714	0.727273	0.733333	0.714286	0.785714	0.736842	0.777778	0.028169	0.3125	0.0136986	0.163636	0.0823529	0.0384615	0
CHHDMR	7744	Bd21-3.CHH	Bd3	36630700	36630899	199	hypo	0.53125	0	0.603774	0	0.764706	0.710526	0.433962	0.39726	0	0.536232	NA	0.652174	0.540541	0.52459	0.19837	0.0119048	0.322222	0	0.166667	0.279476	0.230189
CHHDMR	7771	Bd21-3.CHH	Bd3	37457700	37457899	199	hypo	0.0294118	0.0197044	0.28	0	0.0952381	0.101562	0.0935252	0	0	0.431373	0	0.217391	0.240741	0.377193	0.0625	0.00543478	0.243094	0	0	0.0416667	0.0942408
CHHDMR	7798	Bd21-3.CHH	Bd3	37902700	37902899	199	hypo	1	1	0.333333	1	1	1	0.666667	0.866667	0.928571	1	1	1	1	1	0.0111111	0.00606061	0.242424	0.142857	0.136364	0	0.047619
CHHDMR	7800	Bd21-3.CHH	Bd3	37949000	37949199	199	hypo	0.714286	0.962963	1	NA	0.5625	1	0.8	0.333333	0.488889	0.461538	1	0.553191	0.428571	0.666667	0.183099	0.00250627	0.265487	0.416667	0.188312	0.457143	0.108014
CHHDMR	7819	Bd21-3.CHH	Bd3	38376900	38377099	199	hyper	0.883721	0.745455	0.941176	1	0.857143	0.833333	0.928571	0.695652	0.410256	0.6	0	0.75	0.242424	0.518519	0.0538922	0.22069	0.0235294	0.0769231	0.0645161	0.216	0.0645161
CHHDMR	7854	Bd21-3.CHH	Bd3	39183600	39183799	199	hyper	0.929825	0.9375	1	0.95	1	0.785714	0.933333	0	0.375	0	0	NA	0.107143	0.176471	0.025	0.291667	0	0.111111	0.136364	0.0727273	0.112903
CHHDMR	7877	Bd21-3.CHH	Bd3	39550800	39550999	199	hyper	0.5	0.860465	0	0	0	0.461538	0	0	0.35	0	0	0	0.375	0	0.037037	0.407534	0	0	0.0172414	0.176871	0
CHHDMR	7883	Bd21-3.CHH	Bd3	39656600	39656799	199	hyper	0.974576	0.956522	0.965517	1	0.957447	0.966667	0.988235	0.6	0.742574	0.586207	0.571429	0.72	0.763636	0.711538	0.137255	0.345946	0.010101	0.029703	0.366279	0.387048	0.0487395
CHHDMR	7885	Bd21-3.CHH	Bd3	39728600	39728799	199	hypo	0.911917	0.992908	0.979452	0.965986	0.964912	0.930108	0.965909	0.5	0.621212	0.555556	0.558442	0.64	0.61	0.690141	0.0467091	0.0315186	0.294624	0.131926	0.128159	0.0948767	0.105325
CHHDMR	7892	Bd21-3.CHH	Bd3	39982200	39982399	199	hypo	0.976744	0.8	1	NA	0.666667	1	1	0.676471	0.214286	0.625	0	0	0.444444	0.208333	0.175299	0.0178571	0.416	0.0857143	0.0967742	0.347826	0.21134
CHHDMR	7897	Bd21-3.CHH	Bd3	40089000	40089199	199	hypo	0.984375	0.977444	1	0.958904	0.982759	0.926316	0.994318	0.492308	0.742857	0.8	0.759259	0.79661	0.711538	0.775281	0.0239234	0.037037	0.296	0.0990991	0.0310078	0.0851064	0.03003
CHHDMR	7946	Bd21-3.CHH	Bd3	40855700	40855899	199	hypo	0.967391	0.969388	0.954545	1	0.961538	0.849462	1	0.733333	0.745283	0.795918	0.909091	0.88	0.820755	0.722222	0.162679	0.0340909	0.357143	0.373832	0.192771	0.119691	0.0972222
CHHDMR	7983	Bd21-3.CHH	Bd3	41592000	41592199	199	hypo	0.885714	1	1	1	1	1	1	0.684211	0.5	0.6	0.4	0.714286	1	0.875	0.0824373	0.0222222	0.348837	0	0.0357143	0.116883	0.0422535
CHHDMR	8016	Bd21-3.CHH	Bd3	42175500	42175799	299	hypo	1	1	0.956522	0.869565	0.978261	0.933333	0.957746	NA	0.83871	1	NA	0.823529	0.25	0.84375	0.277778	0.0369231	0.358852	0.0914634	0.191693	0.115044	0.152577
CHHDMR	8087	Bd21-3.CHH	Bd3	44285600	44285799	199	hypo	1	1	1	1	1	NA	1	0.888889	1	1	0.923077	1	NA	0.8	0.0641026	0	0.297872	0.111111	0.146341	0	0.103448
CHHDMR	8097	Bd21-3.CHH	Bd3	44519500	44519699	199	hypo	0.888889	0.658537	0.972973	0.875	1	1	0.927273	0.578947	0.444444	0.8125	0.777778	0.5	0.939394	0.6	0.115385	0	0.309859	0.142857	0	0.325301	0.372093
CHHDMR	8104	Bd21-3.CHH	Bd3	44577400	44577599	199	hyper	0.992958	0.961353	0.974138	1	0.988636	0.968675	0.984733	0.655172	0.506849	0.461538	1	0.572464	0.443548	0.56	0.443299	0.335766	0.00653595	0	0.00645161	0.121212	0.573298
CHHDMR	8131	Bd21-3.CHH	Bd3	45012600	45012799	199	hyper	0.978723	0.891841	0.968379	0.981971	0.984222	0.986364	0.988136	0.746888	0.848958	0.727848	0.948454	0.872654	0.779412	0.831754	0.546243	0.411215	0	0	0.00756144	0.214286	0.38447
CHHDMR	8135	Bd21-3.CHH	Bd3	45034700	45034899	199	hypo	0.833333	0.166667	1	1	1	1	1	0.25	0	0.416667	1	0.777778	0.6	0.266667	0	0	0.294872	0	0	0	0.134328
CHHDMR	8160	Bd21-3.CHH	Bd3	45539300	45539499	199	hypo	0.884615	0.925926	0.87037	1	0.923913	0.983333	0.95098	0	0	0.125	0	0.117647	0	0.138889	0.12	0.0222222	0.253425	0.068323	0.0970874	0.142857	0.145522
CHHDMR	8164	Bd21-3.CHH	Bd3	45619100	45619299	199	hyper	0.947644	0.90604	0.857143	1	0.877193	0.984375	0.948052	0.387097	0.457143	1	0.285714	0.75	0.73	0.540984	0.178571	0.323108	0	0.343558	0.00454545	0.0242537	0.00921659
CHHDMR	8180	Bd21-3.CHH	Bd3	45974100	45974299	199	hypo	0.925926	0.907895	0.973333	0.992908	0.96732	0.938144	0.969388	0.705882	0.860759	0.891304	0.848485	0.890909	0.8125	0.77	0.101493	0.0422961	0.323864	0.0696203	0.137255	0.131687	0.120654
CHHDMR	8185	Bd21-3.CHH	Bd3	46076300	46076599	299	hyper	0.752066	0.841667	0.897436	0.921875	0.88	0.815126	0.79845	0.38191	0.552036	0.595745	0.444444	0.603448	0.659574	0.592593	0.100402	0.258716	0.029661	0.171717	0.309859	0.324771	0.308605
CHHDMR	8245	Bd21-3.CHH	Bd3	46959500	46959699	199	hypo	0.0882353	0	0.947368	0	0.875	0.153846	0	0.0434783	0	0.73913	0	0.48	0.04	0	0	0.0056391	0.300912	0.0116618	0.126866	0.0117994	0.00247525
CHHDMR	8251	Bd21-3.CHH	Bd3	47029300	47029499	199	hypo	0.975	0.983333	0.969697	1	0.928571	0.920635	0.934426	0.644737	0.865854	0.75	1	0.758621	0.651515	0.917647	0.272455	0.00808625	0.423387	0.266667	0.345946	0.360248	0.0275689
CHHDMR	8267	Bd21-3.CHH	Bd3	47263000	47263299	299	hypo	0.824324	0.956522	0.866667	1	0.833333	0.97561	0.925	0.512195	0.666667	0.842105	1	0.181818	0.794118	0.709677	0.16047	0	0.461078	0.140187	0.0898876	0.129338	0.0646067
CHHDMR	8274	Bd21-3.CHH	Bd3	47410900	47411099	199	hypo	0.980392	0.894737	1	1	1	1	0.913043	0.666667	0.84	0.904762	0.764706	0.666667	0.533333	0.666667	0.0697674	0.015748	0.258621	0	0.285714	0.0194175	0.0657895
CHHDMR	8276	Bd21-3.CHH	Bd3	47431000	47431199	199	hypo	0.955823	0.955285	0.985612	0.966292	0.868778	0.970149	0.930894	0.7109	0.65272	0.676056	0.848101	0.606796	0.614815	0.684932	0.0438972	0.047266	0.347639	0.274463	0.160556	0.3125	0.2453
CHHDMR	8286	Bd21-3.CHH	Bd3	47610900	47611099	199	hyper	0.978166	0.975676	0.979757	0.960187	0.972835	0.969262	0.961202	0.76484	0.734072	0.789091	0.670951	0.648393	0.783529	0.812052	0.169231	0.406844	0.00429185	0	0	0.0544662	0.179348
CHHDMR	8320	Bd21-3.CHH	Bd3	48506200	48506399	199	hypo	1	0.777778	0.857143	1	0.833333	1	0.666667	0	0	0.2	NA	0	0.666667	0	0	0	0.269231	0	0	0.0512821	0.363636
CHHDMR	8330	Bd21-3.CHH	Bd3	48717900	48718099	199	hypo	0.307692	0	0.125	0	0	NA	NA	0.380952	0	0.181818	0	0.181818	NA	0	0.0827338	0.0162162	0.274074	0	0.056338	NA	0
CHHDMR	8404	Bd21-3.CHH	Bd3	50402600	50402799	199	hypo	0.95549	0.976708	0.972973	0.00584795	0.988006	0.966887	0.00573066	0.709343	0.755594	0.709524	0	0.782686	0.795699	0	0.012605	0.0117096	0.22093	0.0168067	0.026253	0.194805	0
CHHDMR	8410	Bd21-3.CHH	Bd3	50560300	50560499	199	hyper	0.856828	0.752525	0.972299	0.984934	0.846449	0.778342	0.974026	0.86631	0.801205	0.692857	0.919492	0.806283	0.672131	0.707736	0.396181	0.451178	0.0147783	0.196629	0.603922	0.352941	0.0553459
CHHDMR	8422	Bd21-3.CHH	Bd3	50749800	50749999	199	hypo	0.937853	0.948905	0.954545	0.960396	0.981982	0.941176	0.956835	0.393443	0.807692	1	0.689655	0.8125	0.545455	0.855263	0	0.00684932	0.22314	0.0697674	0.0102041	0.0235294	0.114286
CHHDMR	8452	Bd21-3.CHH	Bd3	51531900	51532099	199	hypo	0.514286	0.137931	0.631148	0	0.157895	0.0166667	0	0.149068	0.0217391	0.387435	0	0.244186	0	0.00675676	0.0643777	0.00729927	0.315522	0	0.222857	0.00554017	0.0219436
CHHDMR	8482	Bd21-3.CHH	Bd3	52271000	52271199	199	hypo	0.888889	0.666667	1	NA	1	0.5	1	0.4	0	0.416667	NA	0	0.666667	0	0.390511	0	0.308333	0.75	0.676471	0.375	0.166667
CHHDMR	8487	Bd21-3.CHH	Bd3	52339600	52339799	199	hypo	0.956044	0.944444	0.981818	NA	0.978261	1	0.866667	0.659574	0.611111	0.857143	NA	0.785714	0.5	0.5	0.0124224	0	0.274336	NA	0	0.025974	0.03125
CHHDMR	8501	Bd21-3.CHH	Bd3	52666100	52666299	199	hypo	0	0	0.442857	0.0526316	0	0.590361	0.396947	0	0	0.571429	0	0	0.738095	0.596154	0.025	0.0185759	0.39577	0	0.00564972	0.380353	0.315888
CHHDMR	8528	Bd21-3.CHH	Bd3	53382300	53382499	199	hypo	0.692308	0.857143	1	1	1	0.833333	1	0.486842	0.73913	0.666667	0.9	1	0.764706	0.857143	0.0615764	0.0334728	0.440678	0.231884	0.195745	0.161572	0.205298
CHHDMR	8557	Bd21-3.CHH	Bd3	53835600	53835799	199	hypo	1	0.75	1	1	1	1	0.909091	0.608696	0.2	0.5	1	0.928571	0.434783	0.4	0	0.0344828	0.235294	0	0.211765	0.1	0.0462963
CHHDMR	8566	Bd21-3.CHH	Bd3	54030500	54030699	199	hyper	0.967742	0.952381	0.951613	0.947368	0.769231	0.686275	0.934673	0.603053	0.833333	0.719512	0.952381	0.956522	0.644068	0.580247	0.00547945	0.495495	0.0119048	0.0454545	0.0526316	0.201835	0.00577201
CHHDMR	8636	Bd21-3.CHH	Bd3	55857300	55857499	199	hypo	0.849057	0.967033	0.767857	0.888889	0.934426	0.941176	0.925926	0.607843	0.535714	0.675	0.578947	0.74359	0.428571	0.530201	0.170732	0.0128205	0.277778	0.376812	0.178571	0.194631	0.202128
CHHDMR	8658	Bd21-3.CHH	Bd3	56604800	56604999	199	hypo	0.355556	0.450549	0.534247	0.566038	0.39	0.514286	0.559524	0.175	0.0681818	0.25	0.227273	0.233333	0.230769	0.288889	0.120735	0.0271084	0.227414	0.124675	0.170667	0.146218	0.145803
CHHDMR	8660	Bd21-3.CHH	Bd3	56640000	56640199	199	hypo	0.901099	0.9	1	NA	1	1	1	0.395833	0.666667	0.625	NA	NA	0.909091	0.5	0.0334572	0	0.304348	NA	0.333333	0.10989	0
CHHDMR	8689	Bd21-3.CHH	Bd3	57302200	57302399	199	hypo	1	1	1	NA	NA	NA	1	0.0344828	0	0	NA	NA	NA	0	0	0	0.2	NA	NA	NA	0
CHHDMR	8716	Bd21-3.CHH	Bd3	58317500	58317699	199	hyper	0.825397	0.65	0.811321	0.975309	0.855263	0.907216	0.82659	0.447761	0.6	0.413793	0.483333	0.346939	0.663265	0.45098	0.233577	0.32	0.0337838	0.12	0.158192	0.317857	0.137019
CHHDMR	8751	Bd21-3.CHH	Bd3	59524800	59525099	299	hyper	0.933333	0.95082	0.967742	1	0.938462	0.983333	0.97561	0.645833	0.796296	0.925926	0.807692	0.768421	0.741379	0.702703	0.0714286	0.247093	0.0188679	0.154008	0.117886	0.0923077	0.226966
CHHDMR	8754	Bd21-3.CHH	Bd3	59719900	59720099	199	hypo	0.917595	0.960526	0.984576	0.961905	0.979167	0.936232	0.975281	0.0692308	0.313725	0.708108	0.0392157	0.0338983	0.0555556	0.147239	0.00692042	0.00606061	0.241463	0	0	0	0
CHHDMR	8778	Bd21-3.CHH	Bd4	347300	347499	199	hypo	0.87619	0.967742	0.939394	0.944444	1	0.957447	0.903846	0.348837	0.508475	0.694444	0.666667	0.333333	0.393939	0.205128	0.326711	0.00473934	0.547872	0.0892857	0.21875	0.056701	0.020202
CHHDMR	8780	Bd21-3.CHH	Bd4	392500	392699	199	hypo	1	0.888889	0.888889	NA	0	0.625	0.647059	NA	0.458333	0.571429	NA	0	0.697674	0.559322	0	0	0.21	NA	0.111111	0.0458716	0.0468227
CHHDMR	8797	Bd21-3.CHH	Bd4	766100	766299	199	hyper	0.98682	0.74902	0.985849	0.686404	0.707055	0.885762	0.883077	0.747277	0.822289	0.718519	0.919315	0.922297	0.826224	0.881508	0.159116	0.382593	0.00887574	0.172414	0.199219	0.388024	0.62472
CHHDMR	8803	Bd21-3.CHH	Bd4	1034500	1034699	199	hypo	NA	0.875	1	0	1	1	0.75	NA	0.4	1	1	1	0.857143	0.5	NA	0.037037	0.465116	0.5	0.266667	0.0185185	0.140845
CHHDMR	8818	Bd21-3.CHH	Bd4	1423100	1423499	399	hyper	0.015625	0.520968	0	0	0	0	0.0121951	0.0649351	0.463287	0	0	0	0.0294118	0	0.00218341	0.331974	0	0	0	0	0.00425532
CHHDMR	8821	Bd21-3.CHH	Bd4	1446800	1446999	199	hyper	0.975	0.976744	1	NA	1	0.964286	1	0.535714	0.647059	0.909091	NA	0.866667	0.55	0	0.135922	0.357616	0	NA	0.05	0.102041	0.45
CHHDMR	8835	Bd21-3.CHH	Bd4	1817700	1817899	199	hypo	0.6	0.941176	1	1	1	NA	NA	1	0.478261	0.714286	NA	0.75	NA	1	0.0576923	0.0209424	0.292683	0.272727	0.650794	0.166667	0.0833333
CHHDMR	8874	Bd21-3.CHH	Bd4	2433400	2433599	199	hypo	0.351852	0.625	0.485714	NA	0.333333	0.363636	0.541667	0.290698	0.454545	0.384615	NA	0.666667	0.111111	0.404255	0.0593607	0.0163934	0.315789	NA	0.339623	0.0530973	0.0473934
CHHDMR	8909	Bd21-3.CHH	Bd4	3264500	3264699	199	hyper	0.918367	0.923077	1	1	1	1	0.894118	0.5	0.448276	0	1	NA	0.333333	0.45	0.25	0.283737	0	NA	0	0.0128205	0.306897
CHHDMR	8915	Bd21-3.CHH	Bd4	3411500	3411799	299	hyper	1	0.666667	0	0	0.75	0.8	0.25	0.603448	0.379747	0	0	0.509804	0.528302	0.490909	0.190698	0.300683	0.00307692	0	0.309735	0.153571	0.246377
CHHDMR	8966	Bd21-3.CHH	Bd4	4436200	4436399	199	hypo	NA	0.0075188	0.965649	0.966667	0.0428571	0	0.0149254	NA	0	0.76129	0.671533	0.0697674	0.04	0	NA	0.00490196	0.306483	0.153846	0.0215054	0	0
CHHDMR	8975	Bd21-3.CHH	Bd4	4573700	4573999	299	hypo	0.05	0	0.235294	NA	0	0	NA	0.37037	0.230769	0.6	NA	NA	NA	0	0.167927	0.0118812	0.23956	NA	0	0	0.210526
CHHDMR	8995	Bd21-3.CHH	Bd4	4873200	4873399	199	hyper	0.919355	0.881579	0.990654	0.973451	0.666667	0.944664	NA	0.875	0.5625	0.813953	0.91	0.5	0.570652	0.5	0.833333	0.528302	0.0272109	0.0857143	0.333333	0.0389908	0.5
CHHDMR	9053	Bd21-3.CHH	Bd4	6295300	6295499	199	hypo	NA	NA	0.5	NA	1	1	1	NA	NA	0.5	NA	0	0.5	1	0	0.0212766	0.265306	NA	0.03125	0.333333	0.181818
CHHDMR	9054	Bd21-3.CHH	Bd4	6354300	6354499	199	hypo	NA	NA	NA	0.75	NA	NA	NA	NA	NA	NA	NA	NA	NA	NA	0.0954064	0.0111111	0.299197	0.401015	0.276224	0.175	0.27234
CHHDMR	9060	Bd21-3.CHH	Bd4	6447300	6447499	199	hypo	0.55	0.4375	0.625	0.666667	0.333333	0.666667	0.266667	0.51773	0.0930233	0.727273	0.0769231	0.156863	0.33871	0.0416667	0.110048	0.00429185	0.234727	0.100917	0.044586	0.031746	0.0103093
CHHDMR	9069	Bd21-3.CHH	Bd4	6734600	6734799	199	hypo	0.984375	0.97191	0.869565	0.789474	0.847826	0.907407	0.883721	0.705128	0.659259	0.5	0.772727	0.604167	0.717949	0.555556	0.010772	0.0393701	0.292818	0.336957	0.220264	0.054878	0.104972
CHHDMR	9089	Bd21-3.CHH	Bd4	7108200	7108399	199	hypo	0.416667	0.153846	0.3	0	0.2	0.166667	0.4	0.133333	0	0	0	0	0.05	0	0.137255	0	0.319149	0	0.1	0.0891089	0
CHHDMR	9112	Bd21-3.CHH	Bd4	7615800	7615999	199	hypo	0.0263158	0.0142857	0.5	NA	0	0	0	0.025974	0.0116279	0.457143	NA	0.0869565	0	0.117647	0.0121655	0	0.433824	NA	0	0	0.127273
CHHDMR	9122	Bd21-3.CHH	Bd4	7818400	7818599	199	hyper	0.948012	0.98441	0.979253	0.981132	0.987226	0.978102	0.988491	0.560748	0.684211	0.627907	0.776786	0.673267	0.664384	0.704641	0.097561	0.355623	0.00497512	0.00843882	0.31358	0.110403	0.0254777
CHHDMR	9135	Bd21-3.CHH	Bd4	8127200	8127399	199	hyper	0.9375	0.875	0.95	NA	0.809524	NA	0.909091	0.4	1	0.833333	NA	0.75	NA	0.25	0.0105263	0.240175	0.00680272	NA	0.0485437	0	0.0591133
CHHDMR	9162	Bd21-3.CHH	Bd4	9044500	9044699	199	hypo	NA	0.642857	1	0.666667	0.5	1	NA	NA	0.185185	0.222222	0.363636	0.142857	0.333333	NA	NA	0.0170455	0.349206	0.0461538	0.0140845	0.125	NA
CHHDMR	9171	Bd21-3.CHH	Bd4	9342000	9342199	199	hypo	0	0.125	0.714286	0	0.142857	0.222222	0	NA	0	0	0	0	0	NA	0	0.0175439	0.41	0.352941	0.0238095	0.242424	0
CHHDMR	9202	Bd21-3.CHH	Bd4	10239700	10239899	199	hypo	0	0	0.864865	0	0	0.0454545	0.648438	0	0	0.8625	0	0	0	0.655022	0.008	0.00714286	0.218391	0	0	0	0.21147
CHHDMR	9246	Bd21-3.CHH	Bd4	11194200	11194399	199	hypo	0.883721	1	1	0	0.95122	1	0.911765	0.6375	0.657143	0.783333	0	0.857143	0.757576	0.692308	0.0854701	0	0.280374	0	0.078125	0.122905	0.260274
CHHDMR	9272	Bd21-3.CHH	Bd4	11735000	11735199	199	hypo	0.9	0.968254	1	1	0.5	NA	1	0.294118	0.4	0.714286	0.571429	1	NA	0.6	0.144	0.0367647	0.37594	0.462687	0.333333	NA	0.0701754
CHHDMR	9291	Bd21-3.CHH	Bd4	12332000	12332199	199	hypo	NA	NA	NA	NA	NA	NA	NA	1	1	0	NA	1	1	1	0.106509	0.0431655	0.272727	0.222222	0	0.327586	0.0512821
CHHDMR	9303	Bd21-3.CHH	Bd4	12538000	12538199	199	hypo	0.282609	0.708333	0.933333	NA	0.6	NA	NA	0.385417	0.52381	0.666667	NA	1	NA	NA	0.115538	0	0.357798	NA	0.0566038	NA	NA
CHHDMR	9332	Bd21-3.CHH	Bd4	13255200	13255399	199	hypo	0.966102	0.953368	0.970149	0.983539	0.965596	0.944767	0.922078	0.788177	0.100775	0.785489	0.268222	0.294028	0.359649	0.0557185	0.280335	0.0060423	0.289298	0.0271739	0.00711744	0.0297203	0.0201511
CHHDMR	9348	Bd21-3.CHH	Bd4	13666100	13666299	199	hyper	0.173729	0.943144	0.983539	0.968254	0.963768	0.966102	0.985075	0.156863	0.626374	0.417647	0.626667	0.641026	0.596591	0.777778	0	0.382253	0.00952381	0	0.554745	0.306306	0.571429
CHHDMR	9361	Bd21-3.CHH	Bd4	13916200	13916399	199	hypo	0.285714	0	0.5	0.5	0.333333	0.666667	0.5	0.125	0	0.333333	0.5	0.25	0.75	0.375	0.0789474	0.0232558	0.317073	0.0625	0	0.258065	0.336207
CHHDMR	9371	Bd21-3.CHH	Bd4	14014000	14014199	199	hypo	0.833333	0.258065	0.428571	0.75	0.385965	0.396226	0.290323	0	0	0.333333	1	0.26087	0.117647	0	0.0652174	0.0194175	0.390244	0.222222	0.182222	0.252381	0.253846
CHHDMR	9401	Bd21-3.CHH	Bd4	14633900	14634099	199	hypo	0.691176	0.206897	0.8	NA	0.909091	0.5	0.615385	0.315789	0.0526316	0.3	NA	0.75	0.125	0.142857	0.0994152	0	0.261905	NA	0.0166667	0.0666667	0
CHHDMR	9415	Bd21-3.CHH	Bd4	14966600	14966799	199	hyper	0.984733	0.690476	0.904762	0.873563	0.934211	0.987805	0.820312	0.0168067	0.515152	0.047619	0.82	0.21875	0.111111	0.0531915	0.00728597	0.527094	0	0.58	0.0250784	0.0155763	0.00875274
CHHDMR	9416	Bd21-3.CHH	Bd4	14971500	14971699	199	hypo	0.961165	0.981481	0.987654	0.884615	0.953757	0.972696	0.982387	0.70936	0.731801	0.78481	0.657718	0.114583	0.637931	0.818182	0.0107239	0.0147368	0.488491	0.336683	0	0.0517711	0.332198
CHHDMR	9496	Bd21-3.CHH	Bd4	16656300	16656499	199	hypo	NA	NA	NA	NA	NA	NA	NA	NA	NA	NA	NA	NA	NA	NA	0.307692	0	0.571429	NA	0.5	0.882353	0.382353
CHHDMR	9511	Bd21-3.CHH	Bd4	16956300	16956499	199	hyper	0.0154143	0.983333	0.995074	0.0031746	0.976744	0.98254	0.981096	0	0.46	0.642857	0.0204082	0.769231	0.742268	0.404959	0.0049505	0.271357	0.00775194	0	0	0.132686	0.0964467
CHHDMR	9536	Bd21-3.CHH	Bd4	17541800	17541999	199	hyper	0.0162602	0.983607	0.955752	0.0127119	0.0116959	0.912	0.575972	0.00769231	0.757962	0.208333	0	0	0.351351	0.0211268	0.011236	0.46729	0.0172414	0	0	0.0246914	0.0165746
CHHDMR	9539	Bd21-3.CHH	Bd4	17597500	17597699	199	hypo	0.833333	0.96875	0.971831	1	1	0.973333	0.986301	1	0.740741	0.692308	0.6	0.461538	0.681818	0.681818	0.0612245	0.0238095	0.239437	0.238095	0.0533333	0.0223464	0.166667
CHHDMR	9556	Bd21-3.CHH	Bd4	17840200	17840399	199	hypo	0.97619	0.974026	1	1	0.982759	0.96	0.986667	0.741379	0.837209	0.717391	0.891892	0.780822	0.898551	0.917526	0	0.011194	0.215517	0.0136986	0.0416667	0	0
CHHDMR	9590	Bd21-3.CHH	Bd4	18505300	18505499	199	hyper	0.833333	NA	1	1	1	1	0.333333	0.928571	1	1	1	0.818182	0.909091	1	0.0140845	0.22549	0.030303	0.2	0.1	0.0608108	0.133858
CHHDMR	9599	Bd21-3.CHH	Bd4	18621600	18621799	199	hypo	0.25	0.875	0.913043	NA	0.9	0.923077	0.981818	0.0697674	0.117647	0.34375	NA	0.428571	0.37037	0.456522	0.00666667	0.0192308	0.270833	NA	0	0.0214286	0.00529101
CHHDMR	9601	Bd21-3.CHH	Bd4	18625400	18625599	199	hyper	0.166667	0.555556	0.4	NA	0.583333	0.666667	0.4	0.097561	0.444444	0.166667	NA	0.384615	0	0.416667	0.0241935	0.439024	0	NA	0.236842	0	0.0322581
CHHDMR	9605	Bd21-3.CHH	Bd4	18747000	18747199	199	hypo	0.00384615	0.969758	0.987342	0.960926	0.987705	0.971034	0.983302	0.0246914	0.515152	0.625	0.605714	0.62069	0.665116	0.66	0	0.00684932	0.240876	0.0526316	0.0672269	0.0232558	0.0763359
CHHDMR	9614	Bd21-3.CHH	Bd4	19056400	19056599	199	hyper	1	0.954545	1	NA	1	1	1	0.885714	0.977778	1	1	0.90625	0.794118	0.933333	0.00409836	0.21097	0	0.284553	0.0205128	0.0382166	0.04
CHHDMR	9615	Bd21-3.CHH	Bd4	19056700	19056899	199	hyper	0.975	0.821918	0.894737	0.69697	0.935484	0.914286	0.888889	0.9	0.8	0.666667	0.764706	0.818182	0.736842	0.588235	0.117647	0.28626	0	0.297521	0.0416667	0.0438596	0.0755814
CHHDMR	9616	Bd21-3.CHH	Bd4	19057600	19057799	199	hyper	0.6	0.888889	1	NA	NA	NA	1	0.333333	0.5	NA	NA	NA	NA	0.5	0.1	0.574713	0.0263158	0	0	0	0
CHHDMR	9617	Bd21-3.CHH	Bd4	19099400	19099599	199	hypo	0.833333	0.6	NA	1	0.5	NA	1	0.875	1	1	1	1	1	0.8	0.0261438	0.029661	0.287671	0.054878	0.0373832	0.0469799	0.0227273
CHHDMR	9674	Bd21-3.CHH	Bd4	20404600	20404799	199	hypo	0	0.961039	1	1	0.914894	1	0.976562	0.0217391	0.382979	0.677419	0.236364	0.769231	0.357143	0.827586	0.0206186	0.0265487	0.719512	0.04	0.037037	0.0365854	0.0047619
CHHDMR	9690	Bd21-3.CHH	Bd4	20709500	20709699	199	hyper	0	0.966667	0.647059	1	NA	0.72	0.722222	NA	0.5	0	1	NA	0.583333	0.25	NA	0.218182	0	0	NA	0	0
CHHDMR	9709	Bd21-3.CHH	Bd4	21002400	21002599	199	hypo	0.954545	0.95	1	1	0.953488	0.875	0.95	0.555556	0.511111	0.714286	0.652174	0.588235	0.453125	0.666667	0.0162162	0	0.315789	0	0.0165289	0	0.0273973
CHHDMR	9710	Bd21-3.CHH	Bd4	21007400	21007599	199	hypo	1	1	0.6	1	1	0.875	0.84	NA	0	0.333333	NA	1	0	0.666667	0.25	0.0140845	0.25	0.2	0.470588	0	0.0833333
CHHDMR	9772	Bd21-3.CHH	Bd4	22040000	22040199	199	hypo	0.5	1	NA	1	1	1	1	0.875	0.727273	1	1	0.571429	0.875	0.909091	0.0203046	0.0100671	0.25	0.0510204	0.0246914	0.0487013	0.0441176
CHHDMR	9774	Bd21-3.CHH	Bd4	22087000	22087199	199	hypo	NA	1	1	1	1	0.857143	1	NA	NA	NA	NA	NA	0.5	NA	0	0	0.329412	0.0186916	0	0.00421941	0.133641
CHHDMR	9784	Bd21-3.CHH	Bd4	22284400	22284599	199	hypo	0.766234	0.563107	0.808511	0.862069	0.8	0.584	0.727941	0.176471	0.277778	0.875	0.25	NA	0.7	0.384615	0.237864	0.0445545	0.269461	0.0821918	0.138889	0.165049	0.201493
CHHDMR	9785	Bd21-3.CHH	Bd4	22287400	22287599	199	hyper	0.94697	0.912409	1	0.942731	0.940476	0.890323	0.938389	0.46875	0.540541	0.333333	0.555556	0.529412	0.8125	0.6875	0.0309051	0.269157	0.0416667	0.0437236	0.0339623	0.405357	0.258152
CHHDMR	9787	Bd21-3.CHH	Bd4	22311500	22311699	199	hypo	0.959596	0.919231	0.977778	0.959108	0.973896	0.971861	0.907826	0.671053	0.743697	0.819048	0.789855	0.845455	0.795455	0.820717	0.180488	0.0071599	0.274678	0	0.0188679	0.113456	0.264317
CHHDMR	9835	Bd21-3.CHH	Bd4	23316400	23316599	199	hyper	0.952381	1	1	1	1	0.95	1	0.428571	0.75	1	0.8	0.666667	0.6	0.785714	0.111111	0.285714	0	0.0384615	0.0243902	0.00487805	0.00534759
CHHDMR	9853	Bd21-3.CHH	Bd4	23560100	23560299	199	hypo	0.97619	1	0.928571	1	1	1	1	0.242424	0.75	0.333333	0	1	1	0	0.0933333	0	0.489796	0.181818	0.307692	0.571429	0.116883
CHHDMR	9868	Bd21-3.CHH	Bd4	23872800	23872999	199	hyper	1	1	1	1	NA	1	NA	0.470588	0.666667	0	0.8	NA	0.5	0.8	0.0344828	0.323077	0	0.212121	NA	0.333333	0.214286
CHHDMR	9869	Bd21-3.CHH	Bd4	23901200	23901399	199	hypo	0.85	0.818182	0.826087	0.64	0.589744	0.846154	0.25	0	0.125	0.428571	0.230769	0.428571	0.428571	0.5	0.0728477	0.0191083	0.304569	0.0858896	0.238562	0.27439	0
CHHDMR	9893	Bd21-3.CHH	Bd4	24388100	24388299	199	hypo	0.839806	0.762376	0.929293	0.8	0.595238	0.627907	0.571429	0.300885	0.185185	0.484375	0.210526	0.294118	0.26087	0.09375	0.100386	0.031746	0.315789	0	0	0	0.042735
CHHDMR	9896	Bd21-3.CHH	Bd4	24419300	24419499	199	hypo	0.804878	0.818182	0.974359	1	0.75	0.787879	0.5	0.828571	0.7	0.90625	1	0.833333	0.772727	0.5	0.05	0	0.22449	0	0	0.0212766	0
CHHDMR	9898	Bd21-3.CHH	Bd4	24430400	24430599	199	hypo	0.93617	0.948905	0.971429	0.986667	0.983607	0.981818	0.953125	0.822967	0.669492	0.833333	0.825397	0.746667	0.786408	0.766667	0.03125	0.0196078	0.213235	0	0.025	0.0385488	0.0311111
CHHDMR	9912	Bd21-3.CHH	Bd4	24809700	24809899	199	hyper	0.975862	1	0.985549	0.777778	0.727273	0.909091	0.705882	0.648276	0.6	0.639871	0.615385	0.583333	0.714286	0.714286	0.0146628	0.4	0.00364964	0.0769231	0.0454545	0	0
CHHDMR	9922	Bd21-3.CHH	Bd4	25008500	25008699	199	hypo	0.977011	0.974522	1	1	0.954338	0.95977	0.942085	0.49162	0.425926	0.8	0.46	0.512821	0.512605	0.512821	0.0915141	0.0283912	0.25	0.0208333	0.0857988	0.0358566	0.119048
CHHDMR	9924	Bd21-3.CHH	Bd4	25024300	25024499	199	hyper	0.915385	0.821429	0.946429	1	0.666667	0.884615	0.636364	0.825	0.818182	1	NA	1	0.842105	0.5	0.0305677	0.243243	0	0.375	NA	0	0.130435
CHHDMR	9935	Bd21-3.CHH	Bd4	25239200	25239399	199	hyper	1	0.619718	0.968586	0.542857	0.465753	0.325	0.540698	0.75	0.303571	0.782609	0.266667	0.181818	0.263158	0.35	0	0.258065	0.0360502	0.366906	0.142857	0.222222	0.208178
CHHDMR	9946	Bd21-3.CHH	Bd4	25477600	25477799	199	hyper	1	1	1	1	0.96	1	1	0.655738	0.4	1	0.615385	0.653061	0.642857	0.75	0.0766129	0.22973	0	0.318681	0.0843373	0.205036	0.100775
CHHDMR	9952	Bd21-3.CHH	Bd4	25545600	25545799	199	hypo	0.509804	0.833333	0.84375	1	NA	0.526316	0.85	0.591304	0.428571	0.666667	1	NA	0.684211	0.352941	0.138973	0	0.579618	0	NA	0.536585	0
CHHDMR	9971	Bd21-3.CHH	Bd4	25853400	25853599	199	hypo	0.625	0.888889	0.833333	NA	1	0.6	1	0.5	0.5	0.5	1	0.714286	0	1	0.131579	0.0222222	0.594595	0.4	0.384615	0.366667	0.169492
CHHDMR	10001	Bd21-3.CHH	Bd4	26562900	26563099	199	hypo	0.966292	0.958333	1	0.857143	1	0.972222	1	0.285714	0.470383	0.562092	0.328638	0.917772	0.393939	0.427119	0.0108696	0.0027248	0.33871	0.257143	0.0858144	0.00446429	0.182898
CHHDMR	10013	Bd21-3.CHH	Bd4	27053900	27054099	199	hypo	NA	0.97561	0.0526316	0	0.428571	0	0.0952381	0.7	0.426901	0.367347	0	0.214286	0.132075	0.142857	0.2875	0.014881	0.4375	0.176471	0.450549	0.144444	0.206897
CHHDMR	10085	Bd21-3.CHH	Bd4	28322300	28322499	199	hypo	1	1	1	1	1	1	0.95	1	0.906977	0.894737	0.963636	0.85	0.954023	0.898305	0.0384615	0.0437318	0.238095	0.0463576	0.119205	0.0574163	0.0741935
CHHDMR	10087	Bd21-3.CHH	Bd4	28383500	28383699	199	hypo	0.879365	0.941935	0.976077	0.93	0.964626	0.967339	0.979571	0.23301	0.317757	0.507042	0.381579	0.569038	0.497175	0.581395	0.00921659	0.00816327	0.238095	0.0944882	0.00539084	0.00547445	0.0745968
CHHDMR	10088	Bd21-3.CHH	Bd4	28384800	28384999	199	hypo	0.895522	1	0.919355	1	0.983871	0.969231	0.989796	0.159091	0.272727	0.382353	0.578947	0.233129	0.507463	0.479167	0.142077	0.025	0.262295	0.0784314	0.153846	0.0944056	0.0973451
CHHDMR	10090	Bd21-3.CHH	Bd4	28396000	28396199	199	hypo	0.6875	0.878049	0.933333	1	0.75	0.923077	0.821429	0	0	0	0	0	0	0.111111	0.011194	0.0193906	0.237037	0	0.0606061	0.0978261	0.108374
CHHDMR	10095	Bd21-3.CHH	Bd4	28496400	28496599	199	hypo	0.864865	0.920732	0.960993	0.981589	0.975629	0.979167	0.980597	0.727273	0.448485	0.646288	0.655597	0.667005	0.604575	0.68952	0.0394737	0.0159574	0.305556	0	0.129482	0.00469484	0.559192
CHHDMR	10103	Bd21-3.CHH	Bd4	28659400	28659599	199	hypo	0.9375	0.971429	1	0.947368	1	1	0.884615	0.432432	0.324324	0.111111	0.604651	0.5	0.352941	0.483871	0.153846	0.0310078	0.219512	0.125984	0.0384615	0.104478	0.213793
CHHDMR	10106	Bd21-3.CHH	Bd4	28701400	28701599	199	hyper	0.606061	0.363636	1	1	1	0.666667	0.684211	0.62963	0.5	1	NA	0.75	0.8	0.576923	0.176056	0.511111	0	1	0.0547945	0.428571	0.27027
CHHDMR	10107	Bd21-3.CHH	Bd4	28701800	28701999	199	hyper	0.894737	0.285714	1	1	1	0.407407	0.243243	0.349206	0.368421	0.583333	0.709091	0.68254	0.412844	0.180952	0.0963855	0.234783	0.00704225	0.242188	0.0696203	0.349481	0.14956
CHHDMR	10118	Bd21-3.CHH	Bd4	28896600	28896799	199	hyper	0.967136	0.939535	1	NA	0.824176	0.930052	0.955836	0.744681	0.545455	0.807692	NA	0.595745	0.538462	0.671053	0.429066	0.37299	0.00970874	NA	0.00775194	0.0106383	0.490323
CHHDMR	10121	Bd21-3.CHH	Bd4	28911000	28911199	199	hypo	0.974093	1	0.976744	NA	0.97619	0.972222	0.984043	0.732283	0.558824	0.92	NA	0.901408	0.789474	0.785047	0.392683	0.027027	0.525745	NA	0.386364	0.029703	0.525886
CHHDMR	10124	Bd21-3.CHH	Bd4	28925900	28926099	199	hypo	0.454082	0.870476	0.486014	0.87395	0.248154	0.970276	0.29125	0.257143	0.587629	0.363636	0.88024	0.322034	0.53871	0.337469	0.291457	0.0272109	0.3792	0.331246	0.382596	0.0317869	0.366625
CHHDMR	10141	Bd21-3.CHH	Bd4	29344200	29344399	199	hypo	0.814815	0.764706	0.833333	NA	NA	NA	0.833333	0.136364	0.538462	0.5	NA	NA	NA	0.363636	0.0294118	0.0078125	0.4	NA	NA	NA	0.127451
CHHDMR	10161	Bd21-3.CHH	Bd4	29748600	29748799	199	hyper	0.97619	1	0.875	NA	NA	1	NA	0.787879	0.875	0	NA	NA	1	NA	0.0218121	0.425532	0	0	NA	0.206612	NA
CHHDMR	10163	Bd21-3.CHH	Bd4	29773500	29773699	199	hypo	0.888889	0.877551	0.947368	0.96	1	1	0.9375	0	0	0.5	0	0.2	0.125	0.2	0.163498	0.00505051	0.477273	0.205882	0.047619	0.251163	0.0839695
CHHDMR	10191	Bd21-3.CHH	Bd4	30384300	30384499	199	hypo	0.25	0	0	NA	NA	NA	NA	0.333333	0.111111	0.2	0	NA	0	0.25	0.0285714	0.00909091	0.344828	0	NA	0	0.030303
CHHDMR	10203	Bd21-3.CHH	Bd4	30680200	30680399	199	hypo	0.967742	1	1	1	0.741935	1	1	0.886364	0.786408	0.945946	0.972973	0.697368	0.714286	0.788462	0.0276074	0.0158311	0.29932	0.252101	0.131868	0	0.0298165
CHHDMR	10209	Bd21-3.CHH	Bd4	30746800	30746999	199	hypo	NA	NA	NA	NA	NA	NA	NA	NA	NA	NA	NA	NA	NA	NA	0.120879	0.0289855	0.302752	0	0.131579	0.197531	0.172727
CHHDMR	10229	Bd21-3.CHH	Bd4	31398900	31399099	199	hyper	0.924528	1	0.986014	0.982659	NA	1	0.901639	0.535714	1	0.517857	0.732673	NA	0.714286	0.571429	0.0337079	0.936508	0.0122449	0.0167598	NA	0.904762	0
CHHDMR	10232	Bd21-3.CHH	Bd4	31429500	31429699	199	hypo	0.933333	0.929577	0.692308	0.774194	0.966667	0.878788	0.772727	0.0972222	0.168142	0.48	0.225	0.314815	0.428571	0.129032	0.00481928	0.00775194	0.322222	0	0.0583658	0.05	0.064
CHHDMR	10259	Bd21-3.CHH	Bd4	32041800	32042099	299	hyper	0.625	0.584314	0.989501	0.962389	0.97314	0.777778	0.780374	0.807339	0.634703	0.763566	0.737931	0.804795	0.887755	0.802083	0.0628743	0.360294	0.0025641	0.0436681	0.0159453	0.108209	0.01766
CHHDMR	10340	Bd21-3.CHH	Bd4	33556400	33556599	199	hypo	0.970588	1	0.692308	0	0.666667	0.911765	0.829787	0.6	0.888889	0.416667	0.5	1	0.76	0.285714	0.0365591	0	0.338028	0	0	0.194444	0.0189873
CHHDMR	10360	Bd21-3.CHH	Bd4	33938700	33938899	199	hypo	1	1	1	NA	0.736842	1	1	0.674419	0.8125	1	1	0.974684	0.869565	0.5	0.101449	0.0210526	0.255172	0	0.171149	0.064	0.197917
CHHDMR	10377	Bd21-3.CHH	Bd4	34113100	34113299	199	hyper	0	0.83871	0	NA	0	0.944444	0	0.203704	0.817352	0.0588235	NA	0	0.811024	0	0.0967742	0.320726	0	NA	0	0.313225	0
CHHDMR	10379	Bd21-3.CHH	Bd4	34121300	34121499	199	hypo	0.976471	0.951613	0.757009	0.928571	0.913462	0.918182	0.8	0.583815	0.590164	0.521277	0.702128	0.701923	0.692308	0.555556	0.0566038	0.0153846	0.226131	0.1875	0.137845	0.091314	0.045
CHHDMR	10442	Bd21-3.CHH	Bd4	35254500	35254699	199	hypo	0.954545	1	0.904762	1	0.75	1	1	1	1	0.833333	0	NA	NA	1	0.027027	0.0268817	0.297468	0	0.0877193	NA	0.0898876
CHHDMR	10449	Bd21-3.CHH	Bd4	35411100	35411299	199	hypo	0.818182	0.510638	0.72973	0.8125	0.717949	0.285714	0.766667	0.204545	0.172414	0.541667	0.3	0.333333	0	0.636364	0.037037	0	0.333333	0	0.0227273	0	0.0340909
CHHDMR	10464	Bd21-3.CHH	Bd4	35585200	35585399	199	hypo	0.92	0.95858	0.973684	0.964844	0.938931	0.956522	0.970874	0.5	0.617647	0.898305	0.795918	0.597403	0.769231	0.798883	0.0145631	0.0125945	0.35	0.019084	0.00806452	0.358277	0.562353
CHHDMR	10522	Bd21-3.CHH	Bd4	36567000	36567199	199	hypo	0.402597	0.3125	0.708333	1	1	0	0.666667	0.28	0.315789	0.48	0.4	0.4	0.272727	0.457143	0.03125	0	0.339623	0.0714286	0.114286	0	0.16
CHHDMR	10528	Bd21-3.CHH	Bd4	36626700	36626899	199	hypo	0.681818	0.285714	0.470588	NA	0.473684	0.8	0.3	0	0.0833333	0.4	NA	0.34375	0	0.26087	0.084507	0	0.295082	0	0.161905	0.205128	0.101449
CHHDMR	10580	Bd21-3.CHH	Bd4	37477300	37477499	199	hypo	0.88	0.907407	1	1	0.961538	1	1	0.642857	0.617647	0.56	0.6	0.545455	0.625	0.641026	0.00628931	0.0214286	0.318182	0.0714286	0.0240964	0.0229008	0.0784314
CHHDMR	10581	Bd21-3.CHH	Bd4	37478000	37478199	199	hypo	0.740741	0.803279	0.909091	0.875	0.86911	0.847059	0.835821	0.657143	0.243243	0.3	0.3	0.365079	0.5875	0.26087	0.118812	0.0413223	0.23871	0	0.0785124	0.259386	0.158654
CHHDMR	10617	Bd21-3.CHH	Bd4	38036800	38036999	199	hypo	1	1	0	1	NA	1	1	NA	NA	NA	NA	NA	NA	NA	0.277108	0.04	0.3375	0.44	0.666667	0.321839	0.2
CHHDMR	10630	Bd21-3.CHH	Bd4	38320500	38320699	199	hypo	0.925926	0.941176	1	0.857143	1	0.962963	0.916667	1	1	1	1	NA	1	0.833333	0.0750988	0.0314465	0.254098	0.309091	0.123894	0.137931	0.163793
CHHDMR	10666	Bd21-3.CHH	Bd4	39170800	39170999	199	hypo	NA	1	1	NA	NA	1	1	NA	1	0.666667	NA	NA	NA	0	0	0	0.220339	NA	NA	0	0.272727
CHHDMR	10699	Bd21-3.CHH	Bd4	39891900	39892099	199	hypo	0.8	0.541667	0.782609	NA	0	0.75	0.888889	0	0.166667	0.1875	NA	0	0.5	0.2	0	0.0306122	0.252252	NA	0.166667	0.169231	0.255102
CHHDMR	10701	Bd21-3.CHH	Bd4	39919400	39919699	299	hyper	0.905594	0.870968	0.00873362	0.939914	0.912281	0	0.872881	0.434615	0.597015	0.016129	0.70751	0.55787	0	0.537543	0.0496894	0.340164	0.0238095	0	0.0294118	0.0217391	0.194495
CHHDMR	10737	Bd21-3.CHH	Bd4	40659300	40659499	199	hypo	0.142857	0.25	0.833333	0.5	NA	1	0.25	0.166667	0.5	1	0	NA	0	0.714286	0.274648	0.0434783	0.636364	0.647059	NA	0.0714286	0.129032
CHHDMR	10743	Bd21-3.CHH	Bd4	40761700	40761899	199	hypo	0.881188	0.977778	1	0.933333	0.882353	0.976744	0.848837	0.680851	0.8	0.714286	0.833333	0.8	1	0.904762	0.160356	0	0.353333	0	0.0222222	0.016129	0.0136986
CHHDMR	10754	Bd21-3.CHH	Bd4	41056400	41056599	199	hypo	0.887006	0.967078	0.926471	0.930131	0.926702	0.958506	0.915493	0.625	0.662338	0.588235	0.735294	0.736111	0.5875	0.58427	0.0114943	0.034749	0.258929	0.0227273	0.0842697	0.008	0.028777
CHHDMR	10805	Bd21-3.CHH	Bd4	42262100	42262299	199	hypo	0	0	0.193548	0	0	0.454545	0.24359	0.5	0	0	0	0	0.1875	0.0869565	0	0	0.268657	0	0.0294118	0.0117647	0.123656
CHHDMR	10811	Bd21-3.CHH	Bd4	42321400	42321599	199	hypo	0.75	0.933333	0.535714	0.5	0.818182	0.970588	0.5	0.166667	0.833333	0.36	0.6	0.909091	0.764706	0.265306	0.075	0.0141509	0.237805	0.201835	0.259259	0.0945122	0.183556
CHHDMR	10839	Bd21-3.CHH	Bd4	43156200	43156399	199	hypo	0.792899	0.96	1	0.981758	0.898345	0.962109	0.971193	0.901408	0.5	0.955224	0.569892	0.787097	0.834225	0.791878	0.179775	0.0294118	0.7	0.0232558	0.0551181	0.300654	0.342593
CHHDMR	10852	Bd21-3.CHH	Bd4	43285500	43285699	199	hyper	0.883621	0.43609	0.964706	1	0.937282	0.54	NA	0.587079	0.411458	0.645161	0.668182	0.516729	0.337553	NA	0.155867	0.283582	0.0206186	0.0557377	0.103187	0.301587	NA
CHHDMR	10856	Bd21-3.CHH	Bd4	43416100	43416299	199	hyper	0.325581	0	0	0	0.125	0	0	0.0357143	0.162162	0	0.181818	0.111111	0.193548	0.111111	0.139785	0.266881	0	0.267123	0.196013	0.171141	0.0971429
CHHDMR	10879	Bd21-3.CHH	Bd4	43862200	43862399	199	hyper	0.964523	0.977419	0.980198	0.983395	0.989339	0.966851	0.977333	0.604317	0.769363	0.821577	0.678161	0.787402	0.779167	0.820031	0.0631579	0.286119	0.00671141	0.166667	0	0.462963	0.414258
CHHDMR	10968	Bd21-3.CHH	Bd4	46030600	46030799	199	hypo	NA	1	NA	NA	NA	NA	NA	0.565217	0	0.617021	0	0.827586	0.717949	0.71831	0.0666667	0.0120482	0.231183	0.277778	0.158273	0.354037	0.368421
CHHDMR	10975	Bd21-3.CHH	Bd4	46176200	46176399	199	hyper	0.722222	0.75	0.925373	0.888889	NA	NA	0.666667	0.545455	0.352941	0.393443	0.666667	NA	NA	0.428571	0.137931	0.326087	0.0363636	0.5	NA	NA	0.178571
CHHDMR	10981	Bd21-3.CHH	Bd4	46316200	46316399	199	hypo	0.775862	0.777778	0.961538	0.857143	0.865385	0.909091	0.833333	0.48	0.477273	0.545455	0.857143	0.404255	0.634146	0.519231	0.0772947	0.0298507	0.310811	0.422222	0.186747	0.0816327	0.251748
CHHDMR	11002	Bd21-3.CHH	Bd4	46929300	46929499	199	hypo	0.905172	0.983425	0.983806	0.962963	0.989286	0.947826	0.931204	0.265432	0.506887	0.525896	0.3125	0.527027	0.134228	0.433442	0.0251572	0.00393701	0.251429	0	0.0215517	0	0.0609756
CHHDMR	11024	Bd21-3.CHH	Bd4	47372500	47372699	199	hypo	0	0	1	0.333333	0	0.75	0.588235	0.0434783	0	0.666667	0	NA	0.666667	0.391304	0.00892857	0	0.397059	0.133333	0	0.377778	0.381443
CHHDMR	11083	Bd21-3.CHH	Bd5	635600	635799	199	hypo	0.978261	0.866337	0.983333	0.985	0.97093	0.907051	0.948454	0.453125	0.397436	0.807692	0.14433	0.716912	0.112426	0.146597	0.00537634	0.00235294	0.334459	0.0645161	0	0.00477327	0.232558
CHHDMR	11090	Bd21-3.CHH	Bd5	847200	847399	199	hypo	0.871795	1	0.9375	1	0.935484	1	0.954545	0.580645	0.757576	0.636364	1	0.428571	0.612903	0.28	0.0516129	0.0263158	0.387755	0	0.0263158	0.277778	0.0833333
CHHDMR	11101	Bd21-3.CHH	Bd5	1048900	1049099	199	hypo	0.986667	0.98	0.952381	1	1	1	0.980583	0.875817	0.951128	0.939227	0.756757	0.928571	0.951613	0.909962	0.0339806	0.045977	0.312329	0.0166667	0.182819	0.161058	0.104235
CHHDMR	11114	Bd21-3.CHH	Bd5	1251100	1251299	199	hypo	0.826923	0.142857	0.7	0.75	1	0.538462	0.733333	0.0689655	0	0.0909091	0	0	0.111111	0	0.0744337	0	0.316129	0.0173913	0	0.124031	0.0503597
CHHDMR	11127	Bd21-3.CHH	Bd5	1368500	1368699	199	hypo	0.95	0.976096	0.760563	0.980769	0.787879	0.623188	0.971429	0.628571	0.670951	0.768421	0.685714	0.7	0.598131	0.666667	0.0151515	0.0281124	0.311653	0.0660066	0.24228	0.291391	0.0137931
CHHDMR	11140	Bd21-3.CHH	Bd5	1587500	1587699	199	hypo	NA	0.977778	1	NA	1	NA	0.952381	NA	0.802817	1	NA	1	NA	0.883333	NA	0.0111524	0.423077	NA	0	NA	0
CHHDMR	11182	Bd21-3.CHH	Bd5	2780900	2781099	199	hyper	0.0178571	0.935714	1	0	0.9	0.859296	0.878613	0	0.836538	0.8	0	0.916667	0.631579	0.695652	0.00478469	0.360465	0	0.0485437	0	0.0706107	0.00970874
CHHDMR	11189	Bd21-3.CHH	Bd5	2970700	2970899	199	hyper	1	0.846154	1	1	1	0.913043	0.90625	0.868421	0.857143	0.931818	0.942857	0.898734	0.880952	0.858824	0.0912281	0.316832	0.016	0	0.114943	0.0747664	0.143836
CHHDMR	11200	Bd21-3.CHH	Bd5	3107600	3107799	199	hypo	0.333333	0	0.842105	0	NA	0.862745	0	0	0	0.5	0	NA	0.388889	0	0	0	0.305556	0	NA	0.190114	0
CHHDMR	11205	Bd21-3.CHH	Bd5	3236300	3236599	299	hypo	0.025974	0.0331126	0.678899	0.531532	0.0392157	0.788136	0	0	0.027027	0.252212	0.271186	0.025641	0.353982	0.0188679	0.002849	0.00398406	0.411546	0.269923	0.0963855	0.341951	0
CHHDMR	11234	Bd21-3.CHH	Bd5	3981600	3981799	199	hypo	0.965278	0.968182	0.969697	0.946565	0.98324	0.965517	0.99505	0.219355	0.617188	0.615385	0.679739	0.744186	0.278107	0.518519	0	0.0140845	0.647059	0	0.0215827	0.037037	0.0490196
CHHDMR	11294	Bd21-3.CHH	Bd5	5387700	5387899	199	hypo	0.952607	0.948498	1	0.972973	0.957944	0.966825	0.947368	0.646154	0.690722	0.62069	1	0.622642	0.719298	0.87931	0.0336134	0.0285088	0.350318	0.0888889	0.260504	0.115512	0.0727273
CHHDMR	11303	Bd21-3.CHH	Bd5	5697300	5697499	199	hypo	0.921569	1	0.923077	0.833333	0.8125	NA	1	0.105263	0.363636	0.5	0.25	0.5	NA	0	0.0943396	0.0277778	0.309091	0.15942	0.0703125	NA	0.205128
CHHDMR	11321	Bd21-3.CHH	Bd5	6038000	6038199	199	hypo	0.465116	0.46875	1	0.294118	0.608696	0.888889	0.575	0.278689	0.535714	0.576923	0.645161	0.583333	0	0.531915	0.1025	0.0106383	0.35	0.107477	0.245283	0	0.348837
CHHDMR	11333	Bd21-3.CHH	Bd5	6272000	6272199	199	hypo	0	0	0.631579	1	0.333333	0.809524	0.608696	0	0	0.166667	1	0.125	0.636364	0.111111	0	0	0.254902	0.714286	0.105263	0.168539	0.113208
CHHDMR	11351	Bd21-3.CHH	Bd5	6667300	6667499	199	hypo	1	1	1	1	1	1	1	0.5	1	1	NA	NA	NA	0.666667	0	0.0149254	0.309524	0.0810811	0	0	0
CHHDMR	11354	Bd21-3.CHH	Bd5	6728000	6728299	299	hypo	0.964286	0.952381	1	1	1	0.978723	1	0.641791	0.583333	0.8	0.875	0.818182	0.586207	0.560606	0.0408484	0.035753	0.314574	0.277247	0.239884	0.231519	0.191679
CHHDMR	11356	Bd21-3.CHH	Bd5	6795000	6795199	199	hyper	0.888889	0.777778	0.5	1	1	1	0.8	0.3	0.714286	0	0.642857	1	0.5	0.285714	0.270588	0.368421	0	0.772059	0.740741	0.388889	0.0925926
CHHDMR	11370	Bd21-3.CHH	Bd5	7335600	7335799	199	hyper	0.75	0.95	0.969697	0.833333	1	NA	NA	0.333333	0.5	0.5	NA	NA	NA	NA	0	0.225225	0.0153846	0.0454545	0.134615	NA	NA
CHHDMR	11372	Bd21-3.CHH	Bd5	7336300	7336499	199	hypo	0.893617	0.97561	1	1	0.8	1	1	0.625	0.4	0.833333	1	0.35	0.571429	0.529412	0	0.0138889	0.236364	0.222222	0.0769231	0.192308	0.131579
CHHDMR	11391	Bd21-3.CHH	Bd5	7832900	7833099	199	hypo	0.939394	0.892857	0.666667	1	1	NA	NA	0.0526316	0.0724638	0.230769	0.373626	0.276316	NA	NA	0.046729	0.0147783	0.271429	0.0470219	0.0106952	NA	0
CHHDMR	11411	Bd21-3.CHH	Bd5	8470400	8470599	199	hypo	0.972222	0.973333	0.96875	1	0.987805	0.976744	0.980583	0.845238	0.8	0.892857	1	0.957143	0.675	0.671875	0.026455	0.00518135	0.352113	0	0.0394737	0	0.0941176
CHHDMR	11435	Bd21-3.CHH	Bd5	9042100	9042299	199	hypo	0.9375	0.9	1	1	1	0.5	0.923077	0.555556	0.428571	1	0.5	0.6	0	0.5	0.012931	0	0.565217	0	0	0	0.030303
CHHDMR	11473	Bd21-3.CHH	Bd5	10196600	10196799	199	hypo	0.929825	1	1	1	0.923077	0.949153	0.981818	0.28	0.6875	0.857143	1	0.25	0.6	0.758621	0.0103093	0.025974	0.425926	0.047619	0	0.142857	0.0752688
CHHDMR	11483	Bd21-3.CHH	Bd5	10385200	10385399	199	hyper	0.96129	0.994845	0.962963	0.957655	0.822222	0.967857	0.972167	0.463415	0.553191	0.5	0.592391	0.588235	0.547619	0.430939	0.0215827	0.501946	0	0.0196078	0.0116279	0	0.541322
CHHDMR	11519	Bd21-3.CHH	Bd5	10930400	10930599	199	hypo	0.848341	0.931596	0.959184	1	0.905882	0.904255	0.965714	0.452991	0.555556	0.56	0.833333	0.634146	0.645833	0.608696	0.0621469	0.032967	0.305556	0.416667	0.17561	0.226415	0.125
CHHDMR	11532	Bd21-3.CHH	Bd5	11277400	11277599	199	hypo	1	1	1	NA	1	0.92	1	0.7	0.85	1	NA	0.928571	0.954545	0.857143	0.0344828	0.025974	0.44	NA	0.0555556	0.0225564	0
CHHDMR	11543	Bd21-3.CHH	Bd5	11533500	11533699	199	hypo	0.947368	0.733333	1	NA	1	1	1	0.78125	0.833333	0.846154	NA	0	1	0.692308	0.00826446	0	0.298969	0	0	0.204082	0.0357143
CHHDMR	11575	Bd21-3.CHH	Bd5	12167800	12167999	199	hypo	0.848101	0	0.966102	0.964286	0.966102	0.802083	0.890805	0.67284	0	0.870968	0.459459	0.78	0.77907	0.777778	0.105834	0	0.217082	0.0885417	0.0989399	0.294521	0.267626
CHHDMR	11579	Bd21-3.CHH	Bd5	12195700	12195899	199	hypo	0.666667	0.5	1	0.625	1	1	0.714286	0.189189	0.190476	0.565217	0.111111	0.0769231	0.464286	0.414634	0.123077	0	0.234568	0.140351	0	0.0666667	0.0746269
CHHDMR	11582	Bd21-3.CHH	Bd5	12224200	12224399	199	hypo	0.352113	0.925532	0.442623	0.349398	0.979592	0.87037	0.858824	0.3125	0.636364	0.2	0.0769231	0.711538	0.466667	0.210526	0.370044	0.0149813	0.554795	0.242424	0.0218579	0.0205128	0.0969163
CHHDMR	11628	Bd21-3.CHH	Bd5	13169900	13170099	199	hypo	NA	0.946809	1	NA	NA	NA	0.990099	NA	0.353846	0.821429	NA	NA	NA	0.535211	NA	0.0238908	0.25	NA	NA	NA	0.0626781
CHHDMR	11657	Bd21-3.CHH	Bd5	13889100	13889299	199	hypo	0.977444	0.936709	0.870968	1	1	0.939394	0.965517	0.558824	0.67033	0.592593	0.942857	0.714286	0.690476	0.641026	0.0121212	0.015625	0.709877	0.0622222	0	0.123967	0.0622568
CHHDMR	11723	Bd21-3.CHH	Bd5	14784000	14784199	199	hypo	1	1	1	1	1	0.75	1	0.5	0.5	1	NA	0	0	0.166667	0.0783133	0	0.288462	0	0.0714286	0	0
CHHDMR	11748	Bd21-3.CHH	Bd5	15284100	15284299	199	hypo	0.928571	0.97561	0.964286	0.981481	1	0.973684	0.986111	0.56	0.3125	0.666667	0.64	0.777778	0.461538	0.62963	0.0631579	0.025	0.315789	0.038961	0	0	0.0567686
CHHDMR	11778	Bd21-3.CHH	Bd5	16012500	16012699	199	hypo	0.968208	0.971888	0.994681	0.940887	0.962733	0.95	0.962712	0.563265	0.454545	0.696078	0.510067	0.544601	0.409722	0.477707	0.0430464	0.0250965	0.273109	0.100877	0.238276	0.158537	0.11204
CHHDMR	11782	Bd21-3.CHH	Bd5	16129500	16129699	199	hypo	1	0.962963	1	1	1	1	0.96875	0.83	0.884211	0.709677	0.794118	0.893333	0.914286	0.642857	0.118812	0.0198675	0.341615	0.260101	0.25	0	0.262895
CHHDMR	11799	Bd21-3.CHH	Bd5	16621000	16621199	199	hypo	0.923077	1	0.875	NA	1	NA	1	0.521739	0.857143	0.833333	1	1	0.8	0.842105	0.0423729	0.0267857	0.255814	0	0.0555556	0	0.0666667
CHHDMR	11840	Bd21-3.CHH	Bd5	17333000	17333199	199	hyper	1	0.714286	1	1	1	1	1	0	0.588235	0	1	0	0	0	0.00925926	0.358974	0	0.428571	0.0263158	0.0277778	0.0149254
CHHDMR	11858	Bd21-3.CHH	Bd5	17803500	17803699	199	hypo	1	1	1	1	NA	1	1	0.384615	0.571429	1	1	0.785714	0.588235	0.875	0.025641	0.0263158	0.375	0.65	0.0918367	0.135135	0.617284
CHHDMR	11868	Bd21-3.CHH	Bd5	17991800	17992199	399	hypo	0.922222	0.986667	0.863636	1	0.946708	0.924138	0.865546	0.772727	0.469388	0.403846	NA	0.308642	0.318182	0.157895	0.0557769	0.0379747	0.523529	0.13544	0.361056	0.393305	0.243499
CHHDMR	11906	Bd21-3.CHH	Bd5	18961700	18961999	299	hyper	0.956989	0.929985	0.972509	0.981132	0.888179	0.96962	0.974843	0.699115	0.872263	0.863248	0.625	0.666667	0.793103	0.719101	0.00286533	0.35	0.0204082	0.0291262	0	0.032	0.369565
CHHDMR	11909	Bd21-3.CHH	Bd5	19051600	19051799	199	hyper	0.978873	0.991453	0.98324	0.981723	0.876761	0.992727	0.96577	0.689655	0.868421	0.804878	0.922078	0.893333	0.908046	0.892857	0.0479452	0.429752	0.0190476	0	0.0273973	0.119318	0.18543
CHHDMR	11910	Bd21-3.CHH	Bd5	19054600	19054799	199	hypo	0.960317	0.651685	0.9	0	0.87931	0.856322	0.942675	0.819549	0.311475	0.846154	0	0.787879	0.789216	0.779762	0.294314	0.0148699	0.38835	0	0.180556	0.480159	0.331683
CHHDMR	11951	Bd21-3.CHH	Bd5	19782700	19782899	199	hyper	0.961538	0.5	1	1	1	0.928571	1	NA	NA	NA	NA	NA	NA	NA	0.0470588	0.26	0.0298507	0	0	0.043956	0.0223214
CHHDMR	11986	Bd21-3.CHH	Bd5	20395100	20395299	199	hyper	0.469388	0.512821	0.709677	0.6	0.846154	0.969697	0.938776	0.257143	0.333333	0.5	1	0.444444	0.578947	0.804878	0.0457516	0.258065	0.00970874	0	0.0285714	0.0140187	0.00645161
CHHDMR	12041	Bd21-3.CHH	Bd5	21417200	21417399	199	hypo	0	0	0.629032	0	0	0.0133333	0	0.0428571	0.0165289	0.609756	0.0106383	0.0151515	0.00990099	0.0175439	0.0110803	0.003861	0.230366	0.00555556	0.0247934	0.0216216	0.00645161
CHHDMR	12043	Bd21-3.CHH	Bd5	21450900	21451099	199	hypo	0.307692	0.259259	0.25	NA	0.125	0.291667	0.157895	0.0625	0.0833333	0.230769	NA	0	0.075	0	0.00930233	0.0418605	0.219298	NA	0	0.0833333	0.00892857
CHHDMR	12044	Bd21-3.CHH	Bd5	21460300	21460499	199	hypo	0.5	NA	NA	NA	NA	NA	NA	0.607143	0.910714	0.870968	0.90625	1	0.86	0.888889	0.0220994	0.0353982	0.239669	0.0491803	0.13253	0.219626	0.0755814
CHHDMR	12131	Bd21-3.CHH	Bd5	23237000	23237199	199	hypo	0.95935	0.923077	1	1	0.952381	0.909091	0.939394	0.272727	0.333333	0	0	0.428571	0.4	0.47619	0.128898	0.0194175	0.290598	0.2	0.0181818	0.0882353	0.0470588
CHHDMR	12155	Bd21-3.CHH	Bd5	23894500	23894699	199	hypo	0.0545455	0	0.413793	0.333333	0	0.201389	0.16875	0.01	0.0266667	0.267717	0.5	0	0.176991	0.130682	0.0506912	0.0283688	0.298182	0.2	0	0.151659	0.058651
CHHDMR	12185	Bd21-3.CHH	Bd5	24563400	24563599	199	hyper	0.8	0.93	0.971061	0.98317	0.985075	0.963158	0.991453	0.4	0.559322	0.692308	0.763959	0.867647	0.796875	0.755556	0.05	0.350877	0.0222222	0.0208817	0.0833333	0.344388	0.478142
CHHDMR	12195	Bd21-3.CHH	Bd5	24828000	24828199	199	hypo	NA	0	0	NA	NA	0.0714286	0.25	1	0	0	NA	0	0	0	0	0	0.319588	NA	0.258621	0.025	0.0740741
CHHDMR	12197	Bd21-3.CHH	Bd5	24838300	24838499	199	hyper	0.804878	0.9375	0.938776	NA	0.975904	0.958955	0.958333	0.416667	0.68254	0.5	NA	0.931034	0.438596	0.6	0.259259	0.359184	0.030303	NA	0.333333	0.129964	0.175627
CHHDMR	12202	Bd21-3.CHH	Bd5	25018800	25018999	199	hypo	1	0.84	1	1	0.857143	1	1	0.583333	0.357143	0.733333	NA	NA	0	0.71875	0	0.0402685	0.358696	0	0.347826	0.103774	0.218254
CHHDMR	12207	Bd21-3.CHH	Bd5	25175200	25175399	199	hypo	0.769231	0.975169	0.978571	NA	0.980952	0.960245	0.977528	0.266667	0.676692	0.539474	NA	0.709804	0.678261	0.703364	0.0666667	0.00686499	0.290323	NA	0.00699301	0.00357143	0.00840336
CHHDMR	12272	Bd21-3.CHH	Bd5	27570200	27570399	199	hypo	0.7	0	0.428571	0.25	0	0.148148	0.45098	0.37037	0.027027	0.424	0.277778	0	0.0470588	0.397351	0.135484	0.0104167	0.383886	0.607143	0	0.112426	0.342857
CHHDMR	12278	Bd21-3.CHH	Bd5	27721000	27721299	299	hypo	NA	NA	NA	NA	NA	NA	NA	1	1	1	NA	NA	NA	NA	0.058209	0.0114943	0.236994	NA	0.0625	NA	0.144928
CHHDMR	12345	Bd21-3.CHH	scaffold_54	700	899	199	hypo	0.333333	0.206897	0.571429	0	0.8	0.272727	0.24	0.142857	0.105263	0.375	0	0.166667	0	0.172414	0.012987	0.00934579	0.392857	0.0909091	0	0.03125	0.186813
CHHDMR	8	Bd30-1.CHH	Bd1	239900	240099	199	hypo	0.898649	0.760563	0.866667	0	0.817391	0.0322581	0.917526	0.685185	0.584071	0.571429	0	0.77907	0	0.743243	0.185094	0.352555	0.216036	0.00302115	0.288953	0.0248307	0.0750988
CHHDMR	13	Bd30-1.CHH	Bd1	506000	506199	199	hypo	0.663717	0.111111	0.357143	0.607143	0	0.475	0.375	0.592105	0.117647	0.47619	0.3125	0.103448	0.16	0	0.0512249	0.0296053	0.227941	0.00884956	0.0184049	0.0462428	0.0196078
CHHDMR	55	Bd30-1.CHH	Bd1	1903200	1903399	199	hypo	NA	NA	NA	NA	NA	NA	NA	0.0416667	0.0471698	0	0.159574	0.056338	0.0806452	0.0704225	0.153846	0.147766	0.564356	0	0.0367647	0.178988	0.259386
CHHDMR	67	Bd30-1.CHH	Bd1	2313700	2313899	199	hyper	0.871795	0.961039	0.950311	0.934211	0.955224	0.857143	0.965409	0.352941	0.613861	0.666667	0.896552	0.648148	0.4	0.64497	0.028169	0.022792	0.0292683	0.341463	0	0.0294118	0.00881057
CHHDMR	87	Bd30-1.CHH	Bd1	2987000	2987199	199	hypo	0.826087	0.883212	0.985915	0.870968	0.87013	0.9375	0.942238	0.5	0.28125	0.625	0.666667	0.461538	0.456522	0.387097	0.034188	0.132716	0.287037	0.0208333	0.140449	0.178808	0.12766
CHHDMR	89	Bd30-1.CHH	Bd1	3037700	3037899	199	hypo	0.674419	0.8125	0.95	1	1	0.9	0.92	0.0909091	0	0.285714	0	0	0.333333	0	0.0678851	0.0643564	0.379747	0	0.10101	0.0973451	0.0324074
CHHDMR	187	Bd30-1.CHH	Bd1	5506800	5506999	199	hyper	0.977679	0.941176	0.962264	1	0.981651	0.957265	0.901235	0.795276	0.872881	0.806818	0.727273	0.772487	0.859873	0.834356	0.033033	0.0643564	0.0192308	0.316667	0.0426136	0.0519481	0.0377778
CHHDMR	199	Bd30-1.CHH	Bd1	5756800	5756999	199	hypo	0.528302	0.76	1	0.896552	0.907692	0.925	0.875	0.0277778	0.4375	0.6	0.454545	0.923077	0.714286	0.625	0.0136986	0.05	0.340659	0.027027	0.132075	0.0609756	0.156627
CHHDMR	216	Bd30-1.CHH	Bd1	6222600	6222799	199	hyper	0.952381	0.897436	0.925	0.878788	0.963855	0.965517	1	0.877193	0.815789	0.985507	0.612403	0.909639	0.895238	0.730769	0.00826446	0.020339	0.0233463	0.382284	0.0172117	0.00401606	0.0775194
CHHDMR	225	Bd30-1.CHH	Bd1	6342200	6342399	199	hyper	0.932039	0.886364	1	1	0.918239	0.97561	0.961905	0.131579	0.146341	0.117647	0.545455	0.242718	0.25	0.214286	0.04038	0.00862069	0	0.251852	0.057971	0.0611111	0.0733945
CHHDMR	237	Bd30-1.CHH	Bd1	6580000	6580199	199	hyper	0.638889	0.428571	1	0.866667	0.9	0.8125	0	0.272727	0.208333	0.333333	0	0.318182	0.35	0	0.0992647	0.0769231	0	0.323077	0.107843	0.180328	0
CHHDMR	270	Bd30-1.CHH	Bd1	7406600	7406799	199	hypo	0.785714	0.833333	1	1	0.857143	0.761905	0.970588	0.444444	0.52	0.636364	0.772727	0.388889	0.238095	0.481481	0.027027	0	0.234043	0	0	0	0.0268456
CHHDMR	271	Bd30-1.CHH	Bd1	7428600	7428899	299	hypo	0.882353	0.97	0.914286	0.891304	0.945055	0.912195	0.860963	0.49375	0.645161	0.741935	0.780488	0.768293	0.705882	0.748201	0.0769231	0.136709	0.337778	0	0.315589	0.316129	0.215649
CHHDMR	296	Bd30-1.CHH	Bd1	7997400	7997599	199	hyper	0.583333	0.578947	0.666667	0.733333	0.793103	0.541667	0.466667	0	0	0	0	0	0	0	0.262774	0.0917431	0	0.365079	0.25	0.144444	0.298851
CHHDMR	337	Bd30-1.CHH	Bd1	8860500	8860699	199	hyper	0.90411	0.934211	1	1	1	1	0.99	0.363636	0.243902	0.555556	0.666667	0.111111	0.266667	0.681818	0	0.00331126	0.0212766	0.46875	0.0118343	0.0114943	0.0220386
CHHDMR	360	Bd30-1.CHH	Bd1	9275300	9275499	199	hypo	1	0.571429	0.958333	0.5	0.954545	0.9	0.926829	0.2	0.0925926	0.4	0	0.130435	0	0.101266	0.0298507	0.129353	0.310078	0	0.0704225	0.238095	0.0505837
CHHDMR	435	Bd30-1.CHH	Bd1	10492300	10492499	199	hyper	0.258721	0.812734	0.25	0.354839	0.275862	0.458333	0.601562	0.152893	0.444444	0.106667	0.727273	0.4	0.435897	0.6	0.0301109	0.0229885	0.0117188	0.323944	0.0952381	0.0301887	0.0795455
CHHDMR	451	Bd30-1.CHH	Bd1	10766800	10766999	199	hyper	0.285714	0.375	0	0.666667	1	0.5	1	0	0.5	0	0	0	1	0	0.0801527	0.0149254	0.0149254	0.265625	0.130719	0.11811	0.293103
CHHDMR	463	Bd30-1.CHH	Bd1	10979900	10980099	199	hyper	0	0	0	0.16	0.0178571	0.0172414	0	0	0.00735294	0.015625	0.134146	0	0.0193548	0	0.041958	0	0.00510204	0.485149	0.00714286	0.0161943	0
CHHDMR	493	Bd30-1.CHH	Bd1	11606500	11606699	199	hypo	0.958656	0.966408	0.957895	0.970787	0.974874	0.980392	0.978975	0.821656	0.814465	0.805369	0.770619	0.795082	0.827778	0.842788	0.59164	0.602122	0.444444	0	0.140244	0.652838	0.624273
CHHDMR	658	Bd30-1.CHH	Bd1	15954500	15954699	199	hyper	0.970149	0.944444	1	0.884615	0.962963	0.971429	0.982456	0.756757	0.866667	0.909091	0.733333	0.947368	0.72	0.878788	0.0226537	0.0269058	0	0.247059	0.0952381	0.0531915	0.0212766
CHHDMR	672	Bd30-1.CHH	Bd1	16152200	16152399	199	hyper	0.92	0.916667	1	1	1	0.971429	0.9	0.36	0.913043	1	1	1	0.892857	0.888889	0.0238095	0.0127119	0	0.313253	0.025	0.0077821	0.0307692
CHHDMR	730	Bd30-1.CHH	Bd1	17621600	17621799	199	hyper	0.924242	0.947368	0.941176	0.977273	0.914286	0.921053	0.963855	0.530612	0.625	0.769231	0.789474	0.5	0.744186	0.555556	0.0202247	0.0666667	0.0162162	0.366548	0.137681	0.139738	0.052521
CHHDMR	769	Bd30-1.CHH	Bd1	18792300	18792499	199	hypo	0.888889	0.947368	1	1	0.941176	1	1	0.5	1	1	NA	1	1	1	0.0516432	0.169399	0.51634	0	0.415094	0.384615	0.402913
CHHDMR	774	Bd30-1.CHH	Bd1	18882900	18883099	199	hyper	0.974026	1	1	1	1	1	1	0.222222	0.4	NA	1	0.666667	0.1	0.388889	0.0247748	0.0538462	0.0222222	0.235294	0.0842572	0.0178971	0.0528233
CHHDMR	795	Bd30-1.CHH	Bd1	19396300	19396499	199	hyper	0.848485	1	1	1	1	0.846154	1	0.0277778	0	0	1	0	0.0909091	0.037037	0.00597015	0.0052356	0	0.241611	0	0	0.012605
CHHDMR	808	Bd30-1.CHH	Bd1	19631000	19631199	199	hypo	NA	NA	1	0.764706	0.892857	NA	NA	0	0.2	0.777778	0.538462	0.6	0.333333	0	0	0	0.5	0.0285714	0.29771	0	0
CHHDMR	841	Bd30-1.CHH	Bd1	20249000	20249199	199	hyper	0.896552	0.92	1	1	1	1	1	0.666667	0.5	0.4	1	0.625	0.857143	0.6	0.0125786	0.0155039	0.00925926	0.458333	0.175	0.0582524	0.0545455
CHHDMR	967	Bd30-1.CHH	Bd1	23010900	23011099	199	hyper	0.0769231	0	0	0.924528	0	0	0	0	0	0	0.905263	0	0	0	0.00373134	0	0	0.380952	0	0	0.0240964
CHHDMR	995	Bd30-1.CHH	Bd1	23411700	23411899	199	hyper	0.24	0.212121	1	0.5	1	0.84375	0.914894	0.0641026	0	0.176471	0.142857	0.625	0.105263	0.40678	0.00729927	0	0	0.243902	0.102273	0.0119048	0.0412698
CHHDMR	1004	Bd30-1.CHH	Bd1	23596900	23597099	199	hypo	0.835821	0.974359	0.978261	0.939929	0.975069	0.966942	0.95471	0.438017	0.493976	0.462687	0.638158	0.700508	0.591743	0.684058	0.119469	0.05	0.403361	0.0444444	0	0.681319	0.778598
CHHDMR	1014	Bd30-1.CHH	Bd1	23739900	23740099	199	hyper	0.918919	NA	0.97973	0.851852	0.961165	0.949367	0.966555	1	NA	0.365079	0.866667	0.769231	0.644068	0.694444	0.705882	NA	0	0.434783	0	0.0113636	0.195122
CHHDMR	1027	Bd30-1.CHH	Bd1	24016200	24016499	299	hyper	0.913333	0.685484	1	0.936508	0.941176	0.681564	0.851064	0.698347	0.569061	0.777778	0.767123	0.722222	0.682731	0.833333	0.156197	0.187359	0.0138889	0.418301	0.0555556	0.289951	0.0344828
CHHDMR	1061	Bd30-1.CHH	Bd1	24578200	24578399	199	hyper	0.978261	0.971429	0.952381	1	0.974194	0.98374	0.993197	0.865672	0.907895	0.949367	0.770492	0.949749	0.913043	0.897959	0.019305	0.0332805	0.031477	0.53866	0.0317919	0.0303951	0.0165746
CHHDMR	1062	Bd30-1.CHH	Bd1	24581700	24581899	199	hypo	0.973684	0.909091	1	1	1	0.923077	1	0.391892	0.402985	0.592593	0.762376	0.566038	0.602941	0.702703	0.036036	0.146199	0.26506	0.0224359	0.152778	0.114035	0.0577508
CHHDMR	1079	Bd30-1.CHH	Bd1	24871000	24871199	199	hyper	0.932161	0.950959	0.979275	0.806452	0.961111	0.806452	0.974359	0.446903	0.517857	0.6	0.642857	0.571429	0.571429	0.496599	0.0507726	0.0822581	0.00492611	0.466667	0.0754717	0.302326	0.0637584
CHHDMR	1080	Bd30-1.CHH	Bd1	24920900	24921099	199	hyper	0.950783	0.978659	0.982456	0.8	0.972816	0.666667	0.972705	0.762626	0.685246	0.809211	1	0.887122	0.333333	0.759322	0.0268456	0.00972973	0.009375	0.354839	0.0275449	0	0.0229885
CHHDMR	1085	Bd30-1.CHH	Bd1	25142300	25142499	199	hypo	0	0.567568	0.230769	NA	NA	NA	NA	0.85	0.458333	0.612245	1	NA	NA	1	0.204444	0.243295	0.387597	0	0	0	0.0862069
CHHDMR	1091	Bd30-1.CHH	Bd1	25285300	25285499	199	hypo	1	0.8125	0.954545	1	1	0.666667	0.902439	1	0.5	0.5	0	1	NA	0.666667	0.318182	0.227723	0.387097	0	0.23913	0.421053	0.391753
CHHDMR	1110	Bd30-1.CHH	Bd1	25798300	25798599	299	hypo	1	0.384615	0.846154	0.714286	0.375	0.333333	0.52	0.75	0.676923	0.6	0.918919	0.785714	0.369048	0.642857	0.0571429	0.15311	0.320755	0.0243902	0.00862069	0.0635593	0.151408
CHHDMR	1113	Bd30-1.CHH	Bd1	25841200	25841399	199	hypo	0.928571	1	0.75	1	NA	1	1	0.854167	0.888889	0.875	1	1	0.904762	0.862069	0.0329218	0.0813397	0.2	0.037037	0.157895	0.0206186	0.0308989
CHHDMR	1152	Bd30-1.CHH	Bd1	26813500	26813699	199	hyper	0.933333	0.934579	0.987013	1	0.989583	0.98	1	0.7	0.892857	0.83871	1	0.857143	0.846154	0.767442	0.0117647	0.0121951	0.012987	0.314286	0.00609756	0	0.028
CHHDMR	1224	Bd30-1.CHH	Bd1	28599000	28599199	199	hyper	0.970874	0.983553	0.955357	0.848649	0.854054	0.995575	0.778443	0.51938	0.62963	0.741935	0.6875	0.684685	0.755952	0.626263	0.042796	0.0114841	0.0114679	0.287889	0.180113	0.0243902	0.166322
CHHDMR	1249	Bd30-1.CHH	Bd1	29153700	29153899	199	hyper	0.918919	1	1	0.967213	1	1	0.967742	0.883721	0.2	0.76087	0.666667	1	0.761905	0.637255	0.0254237	0.0188679	0.0174419	0.243243	0.0694444	0.00550964	0.00561798
CHHDMR	1274	Bd30-1.CHH	Bd1	29727000	29727199	199	hypo	0.944444	0.941896	0.973684	0.878505	0.974843	0.929664	0.977273	0.748344	0.74269	0.722222	0.702128	0.737931	0.738095	0.673913	0.0478723	0.0444444	0.240741	0.0123457	0.0456621	0.016835	0
CHHDMR	1306	Bd30-1.CHH	Bd1	30583300	30583499	199	hyper	0.880952	0.948718	0.948718	0.916667	1	0.876106	0.955056	0.584906	0.630435	0.540984	0.852941	0.806452	0.777778	0.694215	0.0961924	0.126147	0.0311111	0.2749	0.189135	0.0546875	0.0977444
CHHDMR	1317	Bd30-1.CHH	Bd1	30698700	30698899	199	hyper	0.949664	0.942935	0.956044	0.921053	0.958678	0.906542	0.99162	0.75	0.409091	0.666667	0.742857	0.652174	0.685714	0.589286	0.0206612	0.0775194	0.0102041	0.461538	0.165049	0.17734	0.040625
CHHDMR	1330	Bd30-1.CHH	Bd1	30919200	30919399	199	hypo	0.690037	0.81448	0.918919	0.680851	0.887179	0.878676	0.815951	0.191919	0.539216	0.555556	0.30303	0.493333	0.592308	0.376471	0.148148	0.271605	0.372222	0.0133333	0.411594	0.393736	0.223827
CHHDMR	1355	Bd30-1.CHH	Bd1	31695300	31695499	199	hypo	0.957746	0.943231	0.968912	0.967262	0.938931	0.96139	0.947368	0.351351	0.335714	0.435115	0.166667	0.447368	0.352941	0.385714	0.232446	0.132296	0.249377	0.016129	0.0308642	0.252049	0.183962
CHHDMR	1366	Bd30-1.CHH	Bd1	32017600	32017799	199	hyper	0.00967742	0.0493506	0.046875	0.264151	0.019305	0	0.00298507	0.0140187	0.00434783	0.015748	0.257143	0.00606061	0.0221239	0.019802	0.0125448	0.0103704	0.0185185	0.331325	0.0179775	0.0126783	0.0133111
CHHDMR	1385	Bd30-1.CHH	Bd1	32377700	32377899	199	hypo	0.85342	0.987382	0.948052	0.888889	0.949438	0.973958	0.967391	0.803704	0.926923	0.861538	0.77551	0.902778	0.904459	0.79798	0.112971	0.168331	0.238806	0	0.186992	0.165072	0.119159
CHHDMR	1395	Bd30-1.CHH	Bd1	32490400	32490599	199	hypo	0.932432	0.903766	0.982906	1	0.942529	0.994413	1	0.684211	0.56044	0.641026	0.8	0.666667	0.444444	0.893617	0.105263	0.106007	0.305732	0	0.222973	0.22549	0.351648
CHHDMR	1396	Bd30-1.CHH	Bd1	32499400	32499699	299	hyper	0.960905	0.963768	0.979651	0.914894	0.995025	0.97019	0.855172	0.652921	0.623037	0.681159	0.875	0.65	0.605556	0.815789	0.034642	0.0102339	0.0133929	0.25	0.00351288	0.0184843	0.177632
CHHDMR	1402	Bd30-1.CHH	Bd1	32626700	32626899	199	hyper	0.957746	0.982906	0.983333	0.967033	0.961538	0.990909	0.971751	0.8125	0.829268	0.8	0.891892	0.916667	0.840909	0.84127	0.0326531	0.00555556	0.00598802	0.358804	0.109453	0.0502793	0.302144
CHHDMR	1403	Bd30-1.CHH	Bd1	32666000	32666199	199	hyper	0.8	1	NA	0.428571	0.833333	1	0	0.829268	0.871795	0.962963	1	0.842105	0.820513	0.806452	0.0268908	0.00945626	0.0244898	0.356688	0.073955	0.0215517	0.0174927
CHHDMR	1420	Bd30-1.CHH	Bd1	32855800	32855999	199	hypo	0.890625	0.9	1	1	1	0.913043	1	0.386364	0.347826	0.517241	0.428571	0.692308	0.451613	0.605263	0.116915	0.0240964	0.234483	0	0.293103	0.0909091	0.103825
CHHDMR	1431	Bd30-1.CHH	Bd1	33109300	33109499	199	hypo	0.969231	0.984848	0.939394	1	1	1	0.963855	0.442308	0.631579	0.6875	0.588235	0.814815	0.545455	0.594595	0.081448	0.020202	0.326984	0.0295567	0.111111	0.103004	0.137374
CHHDMR	1438	Bd30-1.CHH	Bd1	33230400	33230699	299	hyper	0.945946	0.943662	1	1	1	0.912281	0.927536	0.714286	0.72973	0.666667	0.727273	0.733333	0.612903	0.866667	0.097561	0.164211	0.0368764	0.298507	0.105405	0.079235	0.16441
CHHDMR	1514	Bd30-1.CHH	Bd1	34639800	34639999	199	hypo	0.947619	0.966387	0.960784	0.972603	0.931677	0.980583	0.986486	0.648148	0.828571	0.72	0.25	0.534247	0.964286	0.824561	0.032345	0.0576923	0.223602	0.0352113	0.0906863	0.101124	0.0409556
CHHDMR	1540	Bd30-1.CHH	Bd1	35223100	35223299	199	hypo	0.894737	0.882979	0.9375	0.967972	0.890578	0.895833	0.913333	0.543307	0.580808	0.651515	0.889423	0.713043	0.630189	0.685	0.26087	0.358115	0.401747	0.0149105	0.215554	0.373513	0.2668
CHHDMR	1545	Bd30-1.CHH	Bd1	35282300	35282599	299	hypo	0.921875	0.909091	0.95283	0.916667	0.907692	0.913242	0.95933	0.862069	0.653179	0.826087	0.536585	0.683673	0.689655	0.731707	0.0377358	0.260219	0.332326	0.0124611	0.195364	0.167453	0.171569
CHHDMR	1557	Bd30-1.CHH	Bd1	35704500	35704699	199	hyper	0.740741	0.5	0.561404	0.625	1	0.506329	0.527273	0.333333	0.132075	0.325	0.714286	0	0.217391	0.16129	0.020979	0.0220126	0.03125	0.252525	0.25	0.0606061	0
CHHDMR	1574	Bd30-1.CHH	Bd1	36343200	36343399	199	hypo	0.875	0.921875	1	1	1	1	0.982759	0.925	0.767045	0.897959	0.865854	0.868056	0.858974	0.77451	0.823899	0.0442478	0.440594	0.021978	0.0236842	0.1258	0.150883
CHHDMR	1615	Bd30-1.CHH	Bd1	37159400	37159599	199	hyper	0.92	0.933333	1	0.8	1	0.970588	1	0.709677	0.75	0.75	1	0.8	0.954545	0.869565	0.0121212	0.010989	0	0.428571	0.00724638	0	0
CHHDMR	1637	Bd30-1.CHH	Bd1	37410200	37410399	199	hyper	1	0.6	1	1	1	0.875	0.939394	0	0	0.25	1	1	0.85	0.710526	0	0	0	0.393443	0.315789	0.265683	0.299625
CHHDMR	1667	Bd30-1.CHH	Bd1	37834900	37835099	199	hyper	0.727273	0.166667	0.153846	0.5	1	0.392857	0.204082	0.4	0.025641	0	0.142857	0	0.380952	0.119048	0.031746	0.0423077	0.01	0.269231	0	0.0434783	0.0304878
CHHDMR	1680	Bd30-1.CHH	Bd1	37940400	37940599	199	hyper	NA	0.826087	0.916667	1	1	0.9	0.923077	NA	0.5	0.857143	1	NA	0	0	0	0.00591716	0	0.439024	0.0114943	0	0.0109091
CHHDMR	1690	Bd30-1.CHH	Bd1	38013100	38013299	199	hyper	0.925676	0.968627	0.969512	0.958333	0.938776	0.962825	0.974763	0.153846	0.4	0.428571	1	0.416667	0.424242	0.395349	0.0351759	0.030137	0.0318182	0.264706	0.0244499	0.0247396	0.0457018
CHHDMR	1694	Bd30-1.CHH	Bd1	38031300	38031499	199	hypo	0.898305	0.87156	1	1	0.961538	0.96063	0.944724	0.217391	0.342105	0.388889	0.833333	0.434783	0.33871	0.296875	0.00699301	0.0494505	0.335526	0	0.0253807	0.158014	0.176471
CHHDMR	1700	Bd30-1.CHH	Bd1	38081600	38081899	299	hyper	0.941176	0.971429	0.923077	1	1	1	1	0.0526316	0.421053	0	1	NA	0.333333	0.5	0.0415584	0.0566038	0.0190476	0.293103	0.0727273	0.199095	0.225434
CHHDMR	1740	Bd30-1.CHH	Bd1	38808600	38808799	199	hyper	0.909091	0.909091	1	1	1	1	1	0.333333	0.777778	1	0	0.75	0	1	0.0852713	0.0402685	0	0.376344	0.0980392	0.0869565	0.217687
CHHDMR	1765	Bd30-1.CHH	Bd1	39405500	39405699	199	hypo	0.93617	NA	0.971831	0.5	0.976562	NA	0.904412	0.346154	NA	0.76	0.8	0.948718	NA	0.604938	0.243478	NA	0.364444	0.0169492	0.287634	NA	0.276131
CHHDMR	1767	Bd30-1.CHH	Bd1	39409700	39409899	199	hyper	1	0.928571	1	1	1	0.952381	1	1	0	NA	NA	NA	0.5	NA	0.173469	0.212389	0	0.465278	0.0506329	0.469194	0
CHHDMR	1772	Bd30-1.CHH	Bd1	39439500	39439699	199	hyper	0.930958	0.926724	0.994764	0.470588	0.987654	0.949227	0.970745	0.490196	0.589404	0.66055	0.461538	0.603774	0.537118	0.449541	0.0078329	0.0544218	0.014881	0.311111	0.0326633	0.0224949	0.0127389
CHHDMR	1830	Bd30-1.CHH	Bd1	40550100	40550299	199	hypo	0	0.75	1	0.75	1	0.75	1	0	0.0714286	0.333333	0	0	0	0	0.0394737	0.133663	0.363636	0.0169492	0.0833333	0.288732	0.183673
CHHDMR	1839	Bd30-1.CHH	Bd1	40762200	40762399	199	hypo	0.923077	0.951807	1	0.882353	0.985915	0.963415	0.974359	0	0.547619	0.727273	0.363636	0.72	0.470588	0.482143	0.176471	0.133333	0.383234	0	0.136564	0.206349	0.184896
CHHDMR	1840	Bd30-1.CHH	Bd1	40762900	40763099	199	hypo	0.782609	0.97093	0.988235	0.887931	0.833333	0.952	0.985507	0.380952	0.519481	0.735294	0.282609	0.383838	0.507692	0.648649	0.0142857	0.0572519	0.211864	0	0.0446735	0.0674157	0.103093
CHHDMR	1845	Bd30-1.CHH	Bd1	40774200	40774399	199	hyper	0.894737	0.961039	0.95082	1	0.979167	0.942149	0.954023	0.78125	0.564103	0.78125	1	0.538462	0.58	0.719298	0.00775194	0.00930233	0.00558659	0.423077	0.0116279	0.0254958	0.00645161
CHHDMR	1907	Bd30-1.CHH	Bd1	42098900	42099099	199	hyper	1	0.962162	0.924138	0.953125	0.942857	0.989418	0.981424	0.235294	0.133333	0.277778	0.391304	0.392157	0.339286	0.246575	0.0481928	0.0192837	0.0291971	0.271845	0.0239726	0.0994152	0.106036
CHHDMR	1915	Bd30-1.CHH	Bd1	42293700	42293899	199	hyper	0.942197	0.985816	0.994444	0.941935	0.985213	0.978355	0.976303	0.714286	0.81746	0.648148	0.93617	0.823529	0.849315	0.907143	0.0128205	0.209559	0	0.622642	0.0921053	0.289593	0.754137
CHHDMR	1917	Bd30-1.CHH	Bd1	42340700	42340899	199	hyper	0.97449	0.951368	0.991379	0.658667	0.986014	0.9699	0.969512	0.283951	0.517949	0.493671	0.285068	0.319277	0.430233	0.529101	0.013834	0.0252833	0.0329218	0.296085	0.0146561	0.0367299	0.0238569
CHHDMR	1921	Bd30-1.CHH	Bd1	42505900	42506099	199	hypo	0.943396	0.966851	0.96875	0.969349	0.948553	0.979381	0.979104	0.375	0.6	0.590909	0.1	0.5	0.6	0.632184	0.0714286	0.460784	0.693548	0	0.0222222	0.386364	0.358362
CHHDMR	1935	Bd30-1.CHH	Bd1	42746400	42746599	199	hypo	1	0.888889	1	0.933333	1	1	1	0.56	0.166667	0	0	0	0	0	0.0883281	0.0880282	0.252577	0.0255319	0.0779817	0.0638978	0.0486486
CHHDMR	1944	Bd30-1.CHH	Bd1	42908300	42908499	199	hyper	0.966102	0.957447	0.962366	0.975	0.983721	0.983221	0.963255	0.55	0.575758	0.609756	0.603774	0.680412	0.549296	0.657143	0.0953757	0.255537	0.0188679	0.31746	0.188506	0.194842	0.23431
CHHDMR	1955	Bd30-1.CHH	Bd1	43206000	43206199	199	hypo	NA	1	1	1	1	1	1	NA	0.875	1	0.125	0.909091	0.846154	0.727273	NA	0.0540541	0.272727	0	0.252747	0.351351	0.213115
CHHDMR	1978	Bd30-1.CHH	Bd1	43416700	43416899	199	hypo	0.5	0.3	0	0	NA	0.142857	0.08	0.75	0.636364	0.5	0.333333	1	0.466667	0.444444	0.326165	0.214286	0.50237	0	0.322034	0.510638	0.454545
CHHDMR	2015	Bd30-1.CHH	Bd1	44162600	44162799	199	hypo	0.974865	0.942424	0.985075	0.90566	0.985782	0.988095	0.97733	0.733129	0.61435	0.753623	0.363636	0.844	0.626437	0.618375	0.0782918	0.0108527	0.275142	0.0111111	0.12069	0.0271399	0.0250991
CHHDMR	2027	Bd30-1.CHH	Bd1	44397900	44398099	199	hyper	0.724138	0.258065	0.95	0.333333	0.555556	0	0.5	0.28	0.230769	0.25	0.625	1	0	0.285714	0.142857	0.0194175	0	0.65	0	0	0.245902
CHHDMR	2035	Bd30-1.CHH	Bd1	44586000	44586199	199	hyper	0.899598	0.983333	0.984252	0.98155	0.986072	0.97493	0.99	0.5	0.55	0.6	0.598039	0.726619	0.711268	0.728571	0	0.0107527	0	0.312057	0.0058309	0.00477327	0.259804
CHHDMR	2069	Bd30-1.CHH	Bd1	45033400	45033599	199	hyper	NA	0.875415	0.992874	0.72293	0.736682	0.833333	0.884701	NA	0.557895	0.537255	0.528689	0.484649	0.554187	0.571168	NA	0.013132	0.0317893	0.257344	0.0175439	0.0172825	0.0146119
CHHDMR	2092	Bd30-1.CHH	Bd1	45465900	45466099	199	hyper	0.730769	0.166667	1	1	1	0.375	0.142857	0.571429	0	0.857143	0.666667	0.875	0.2	0	0	0	0.0202703	0.346154	0.212644	0.0283688	0.0124224
CHHDMR	2113	Bd30-1.CHH	Bd1	45728000	45728199	199	hyper	0.984375	0.981132	0.962963	1	0.944444	0.982759	0.98	0.777778	0.826087	0.923077	0.857143	0.333333	0.821429	0.866667	0.0179856	0.00452489	0.0175439	0.3125	0.0126582	0.00921659	0
CHHDMR	2157	Bd30-1.CHH	Bd1	46717200	46717399	199	hyper	0	0	0	1	0	0	0	0.00904977	0	0	0.77193	0	0	0	0.00505051	0	0	0.451613	0	0	0
CHHDMR	2247	Bd30-1.CHH	Bd1	48448900	48449099	199	hypo	NA	NA	NA	NA	NA	NA	NA	NA	NA	NA	NA	NA	NA	NA	0.146341	0.178161	0.324022	0.027027	0.0983607	0.0357143	0.214286
CHHDMR	2248	Bd30-1.CHH	Bd1	48483300	48483499	199	hyper	0.986395	0.957447	0.939394	1	0.909091	0.994737	0.947761	0.613372	0.640741	0.585714	0.734513	0.658915	0.656716	0.673913	0.071887	0.0416667	0.0292398	0.345382	0.178862	0.176817	0.0322581
CHHDMR	2272	Bd30-1.CHH	Bd1	48823600	48823799	199	hypo	1	0.945946	0.818182	1	1	0.963636	1	0.882353	0.909091	1	1	1	0.857143	0.833333	0.020979	0.008	0.341463	0	0.196078	0.0196078	0
CHHDMR	2276	Bd30-1.CHH	Bd1	48961200	48961399	199	hypo	0.95	0.36	0.978378	0.84058	0.869565	0.898649	0.958246	0.907317	0.980392	0.970297	0.851064	0.792453	0.819277	0.922559	0.0664452	0	0.312668	0.011236	0	0.116564	0.072445
CHHDMR	2335	Bd30-1.CHH	Bd1	50398000	50398199	199	hyper	0.5	0.870968	0.954545	0.875	0.871795	NA	NA	0.0263158	0	0.2	0.463415	0.210526	NA	NA	0.0231884	0.026087	0	0.453202	0.0285714	NA	NA
CHHDMR	2356	Bd30-1.CHH	Bd1	50961700	50961899	199	hyper	1	0.860759	1	1	1	1	0.777778	0.466667	0.333333	0.285714	0.333333	0.266667	0.333333	0.4	0	0.0567376	0	0.434783	0.109756	0.0114943	0.0854701
CHHDMR	2369	Bd30-1.CHH	Bd1	51255000	51255199	199	hypo	1	0.904762	1	1	0.941176	0.973684	1	NA	NA	NA	NA	NA	NA	NA	0.150442	0.104575	0.390533	0.0232558	0.356481	0.0757042	0.12
CHHDMR	2396	Bd30-1.CHH	Bd1	51643600	51643799	199	hypo	1	0.980226	0.959016	0.962025	0.986486	0.977011	0.975	0.666667	0.497959	0.73913	0.7375	0.720721	0.5	0.57672	0	0.183007	0.435714	0.03125	0.040404	0	0.0234375
CHHDMR	2411	Bd30-1.CHH	Bd1	51896300	51896499	199	hyper	0.92	0.97619	1	1	1	0.923077	0.935484	0.923077	0.9375	1	1	1	0.9	1	0.148036	0.276471	0.0277778	0.408451	0.0518519	0.176471	0.251185
CHHDMR	2412	Bd30-1.CHH	Bd1	51911200	51911399	199	hypo	NA	0.6	0.891892	0.833333	1	0.929204	0.857143	NA	0.857143	0.846154	1	1	0.872727	0.84	NA	0	0.441176	0	0.428571	0.425386	0.311054
CHHDMR	2426	Bd30-1.CHH	Bd1	52256700	52256899	199	hyper	0.905405	0.893939	0.910256	0.954545	0.991304	0.974026	0.986111	0.772727	0.615385	0.857143	0.846154	0.774194	0.722222	0.88	0.169065	0.199531	0.0397727	0.387833	0.107728	0.193038	0.106383
CHHDMR	2457	Bd30-1.CHH	Bd1	52837800	52838099	299	hypo	0.925	0.991453	0.976744	0.980952	0.955056	1	1	0.85	0.769231	0.851852	0.823529	0.947368	0.831683	0.803922	0.0325048	0.060423	0.253456	0.0368421	0.0662651	0.037294	0.0583409
CHHDMR	2460	Bd30-1.CHH	Bd1	52853700	52853899	199	hyper	0.911765	0.940379	0.948529	0.911765	0.943396	0.97973	0.977679	0.863636	0.758865	0.785714	0.7625	0.754601	0.832061	0.779762	0.0238095	0.0196078	0.0149254	0.228916	0.0725389	0.0290135	0.0332226
CHHDMR	2466	Bd30-1.CHH	Bd1	52919800	52919999	199	hypo	0.974271	0.97905	0.982301	0.982759	0.955556	0.974044	0.969866	0.771654	0.845921	0.884848	0.913043	0.905556	0.827957	0.828496	0.0854701	0.0393258	0.326	0.0223464	0.00945626	0.0930537	0.134735
CHHDMR	2467	Bd30-1.CHH	Bd1	52921400	52921599	199	hyper	0.957447	0.977528	0.925926	1	0.977273	0.967742	0.94898	0.814103	0.857143	0.844444	0.884615	0.868421	0.870229	0.815603	0.0217391	0.0233813	0.00454545	0.238095	0.0126183	0.0174326	0.0164671
CHHDMR	2472	Bd30-1.CHH	Bd1	53071900	53072099	199	hypo	0.950704	0.97076	1	0.923077	0.981818	0.984127	0.948718	0.788889	0.625	0.705882	0.555556	0.772727	0.867647	0.916667	0.106762	0.0743802	0.262712	0.030303	0.0454545	0.100529	0.11236
CHHDMR	2545	Bd30-1.CHH	Bd1	54915300	54915499	199	hyper	0.271845	0.333333	0.0740741	0.428571	0.0740741	0.390625	0.385965	0.22449	0.188679	0	0.285714	0.0810811	0.149254	0.173077	0.0161943	0.00393701	0.00564972	0.394877	0.0272727	0.0080429	0
CHHDMR	2589	Bd30-1.CHH	Bd1	55804000	55804199	199	hyper	1	0.909091	1	1	0.982143	1	0.829787	0.2	0.64	0.0833333	1	0.888889	0.666667	0.416667	0.0506667	0.14377	0	0.4	0.105802	0.0625	0.163842
CHHDMR	2593	Bd30-1.CHH	Bd1	55859200	55859399	199	hyper	1	0.857143	1	1	1	0.925926	1	0.166667	0.721854	0.875	0.888889	0.644444	0.532544	0.606452	0.021978	0.0605061	0.0180723	0.314607	0.044665	0.0790476	0.0187573
CHHDMR	2596	Bd30-1.CHH	Bd1	55942100	55942299	199	hypo	0.957082	0.755906	0.885714	0.980392	0.905738	0.80198	0.851974	0.636364	0.588028	0.740741	0.580087	0.673684	0.555882	0.532544	0.038835	0.47486	0.554348	0.0041841	0.498559	0.325459	0.255814
CHHDMR	2630	Bd30-1.CHH	Bd1	56686000	56686199	199	hyper	1	1	0.826087	0.8	0.9375	1	0.9375	0.837838	0.676471	0.857143	0.75	0.5	0.887097	0.8	0.021164	0	0.0288462	0.362319	0	0.00909091	0.122905
CHHDMR	2647	Bd30-1.CHH	Bd1	56964800	56964999	199	hypo	0.827957	0.950287	0.968944	0.808219	0.930556	0.968539	0.931034	0.612613	0.726496	0.862069	0.625	0.6	0.709677	0.8125	0.0288462	0.0130435	0.362745	0	0	0.00757576	0.0185185
CHHDMR	2655	Bd30-1.CHH	Bd1	57155700	57155899	199	hypo	0.584559	0.00769231	0.541935	0.961039	0.661417	0	0.037037	0.323383	0.0309278	0.495575	0.307407	0.394231	0	0.0222222	0.0880361	0.00434783	0.356618	0.0194175	0.203762	0	0.0173913
CHHDMR	2660	Bd30-1.CHH	Bd1	57259100	57259299	199	hypo	0.909091	0.95	0.92	0.833333	1	0.929134	0.857143	0.797101	0.8125	0.85	0.666667	0.888889	0.842105	0.76	0.144737	0.0796813	0.3	0.0222222	0.0666667	0.111446	0.0318471
CHHDMR	2662	Bd30-1.CHH	Bd1	57289900	57290099	199	hypo	0.978261	0.904762	1	0.916667	1	0.647059	0.913043	0.642857	0.6875	0.6	0.166667	0.6	0.75	0.529412	0.0378378	0.379913	0.686957	0.0215054	0.0176991	0.521739	0.0414508
CHHDMR	2677	Bd30-1.CHH	Bd1	57494400	57494599	199	hyper	0.932886	0.947368	0.962963	0.8	1	1	0.866667	0.670213	0.458333	0.584416	0.125	0.5	0.545455	0.608696	0.0859504	0.09375	0.0111111	0.242424	0	0.333333	0.0744681
CHHDMR	2679	Bd30-1.CHH	Bd1	57684100	57684299	199	hypo	0.897129	0.829377	0.934343	0.0192308	0.327869	0.698682	0.226054	0.38488	0.254098	0.350746	0	0.215909	0.187328	0.1	0.200972	0.189076	0.207237	0	0.103627	0.244898	0.119433
CHHDMR	2691	Bd30-1.CHH	Bd1	57972700	57972899	199	hypo	0.934694	0.975186	1	0.984043	0.884354	0.935644	0.87055	0.647059	0.513699	0.666667	0.698113	0.684211	0.686567	0.689189	0.0135593	0	0.544118	0.0144928	0.016129	0.00293255	0.025641
CHHDMR	2700	Bd30-1.CHH	Bd1	58069000	58069299	299	hyper	0	0	0	0.733333	0	0	0	0	0.0243902	0.0344828	0.777778	0	0.478261	0	0.0198511	0.00704225	0	0.356436	0	0.178947	0
CHHDMR	2708	Bd30-1.CHH	Bd1	58191800	58191999	199	hyper	0.814815	0.716981	0.857143	0.897959	0.923077	1	0.97561	0.75	0.5	0.7	0.652174	1	0.818182	0.826087	0.15625	0.22	0.0194175	0.518018	0.09375	0.185185	0.106618
CHHDMR	2738	Bd30-1.CHH	Bd1	59183000	59183199	199	hyper	1	1	1	1	1	1	1	0.888889	0.925926	1	NA	1	0.954545	1	0.0215827	0.0037037	0.0166667	0.56	0.044586	0.0869565	0.0243902
CHHDMR	2776	Bd30-1.CHH	Bd1	60058800	60058999	199	hyper	1	0.963235	1	1	1	0.99115	0.982301	0.790476	0.875	0.884615	1	0.864865	0.866667	0.928571	0.00328947	0.0693642	0	0.385417	0.0797101	0.0843373	0.0530973
CHHDMR	2814	Bd30-1.CHH	Bd1	60649800	60649999	199	hypo	0.935583	0.961977	0.95679	0	0.962099	0.975669	0.962798	0.684685	0.677233	0.712766	0	0.572193	0.502222	0.558583	0.0639098	0.00906002	0.362869	0	0.0078125	0.222482	0.0231729
CHHDMR	2827	Bd30-1.CHH	Bd1	60825200	60825399	199	hypo	0.636364	0.75	1	1	0.666667	1	0.75	0	0	0	0	0	0	0	0.0157895	0.103448	0.333333	0	0.153846	0.12	0.0615385
CHHDMR	2877	Bd30-1.CHH	Bd1	61793000	61793199	199	hyper	0	0.972028	0.935484	0.881356	0.929577	0.263804	0.979452	0.0192308	0.792135	1	0.80814	0.647619	0.323529	0.919786	0.0102041	0.0026178	0.0348837	0.381125	0.0127119	0.150685	0.0117188
CHHDMR	2898	Bd30-1.CHH	Bd1	62095300	62095499	199	hypo	0.75	0.942857	0.890411	0.975	0.844828	0.985294	0.953704	0.206897	0.695652	0.58209	0.421053	0.85	0.710526	0.75	0.0533643	0.113772	0.247191	0.00925926	0.0859729	0.11284	0.0692124
CHHDMR	2942	Bd30-1.CHH	Bd1	62948300	62948499	199	hyper	1	1	1	1	NA	NA	NA	1	0.75	1	1	NA	1	NA	0.112676	0.166667	0	0.372093	0.833333	0.177778	NA
CHHDMR	2946	Bd30-1.CHH	Bd1	62997600	62997799	199	hyper	0.846154	1	1	1	NA	1	1	0.923077	1	0.5	1	NA	0.75	1	0.160804	0.0210526	0	0.428571	NA	0.0428571	0
CHHDMR	2960	Bd30-1.CHH	Bd1	63198400	63198599	199	hypo	1	0.666667	1	0	NA	NA	1	NA	NA	0	0	NA	NA	0.5	0.298013	0.432161	0.365591	0	0.609756	0.192771	0.162162
CHHDMR	2965	Bd30-1.CHH	Bd1	63298300	63298499	199	hypo	0.409091	0.222222	0.333333	0.111111	0.333333	0.4	0.15	1	1	NA	0.5	NA	0.333333	0.5	0.0166667	0.0645161	0.403846	0.010989	0.216216	0.0625	0.114035
CHHDMR	2978	Bd30-1.CHH	Bd1	63621500	63621699	199	hyper	0.966346	0.923977	0.989796	0.948387	0.989247	0.976959	0.981191	0.5	0.466667	0.564516	0.418605	0.637931	0.604167	0.508197	0.0262557	0.00540541	0.0159817	0.270208	0.134328	0.13442	0.250384
CHHDMR	2980	Bd30-1.CHH	Bd1	63647600	63647799	199	hypo	0.969231	0.0769231	0.9375	0	0.533333	0	0.78	0.2	0	0.210526	0	0	0	0.0689655	0.00666667	0	0.375	0	0	0	0.0591133
CHHDMR	2988	Bd30-1.CHH	Bd1	63723100	63723299	199	hyper	0.946154	0.934426	0.913043	0.851064	0	0	0.995283	0.912281	0.934426	0	0.666667	0	0.0833333	0.871212	0.0097561	0.016129	0	0.335526	0	0	0.0105932
CHHDMR	2993	Bd30-1.CHH	Bd1	63814000	63814199	199	hypo	0.961853	0.925	0.965665	0.982353	0.925397	0.933868	0.918956	0.695522	0.67907	0.792952	0.721284	0.785586	0.671429	0.758242	0.600243	0.111111	0.453515	0.0116279	0.0760668	0.0472441	0.357566
CHHDMR	2996	Bd30-1.CHH	Bd1	63833900	63834099	199	hyper	0.978723	0.975684	1	0.962441	0.991803	0.987854	0.980273	0.781955	0.833333	0.466667	0.892857	0.962963	0.796875	0.865741	0.601732	0.461003	0	0.261146	0.634146	0.456053	0.671744
CHHDMR	2999	Bd30-1.CHH	Bd1	63873400	63873599	199	hypo	1	1	0.857143	1	NA	1	1	NA	0.5	0.5	0	NA	0.5	NA	0	0	0.551724	0	0	0.0121951	0.259259
CHHDMR	3011	Bd30-1.CHH	Bd1	64193300	64193499	199	hypo	0.967159	0.969388	0.984962	0.951327	0.94577	0.980418	0.965099	0.7	0.792727	0.893617	0.783133	0.725806	0.694006	0.77619	0.0122549	0.0902935	0.407895	0.0246914	0.00793651	0.0113798	0.00268097
CHHDMR	3050	Bd30-1.CHH	Bd1	64951800	64951999	199	hypo	0.612903	0.893617	0.979167	0.714286	0.952381	0.95	0.939394	0	0	0.111111	0.25	0.0888889	0	0.0882353	0.109375	0.298361	0.422594	0.0240964	0.460641	0.519713	0.40592
CHHDMR	3096	Bd30-1.CHH	Bd1	65685200	65685399	199	hyper	0.977612	0.955882	1	0.8	0.962963	1	1	0.395833	0.380952	0.166667	1	0.714286	0.25	0.371429	0.0764411	0.0246575	0.0224359	0.291667	0.125	0.031401	0.0465116
CHHDMR	3105	Bd30-1.CHH	Bd1	65959300	65959499	199	hyper	0.968831	0.971129	0.992806	0.874251	0.982363	0.965517	0.976331	0.569507	0.641026	0.709302	0.818182	0.678082	0.690341	0.756345	0.206107	0.164623	0.00408163	0.380531	0	0.215041	0.42804
CHHDMR	3114	Bd30-1.CHH	Bd1	66253900	66254099	199	hyper	0.946721	0.962963	0.96875	0.894118	0.983806	0.969178	0.994885	0.73913	0.756923	0.873563	0.692308	0.823333	0.755162	0.80067	0.0226415	0.0178156	0.0251938	0.315565	0.0418888	0.0160701	0.0154739
CHHDMR	3116	Bd30-1.CHH	Bd1	66304100	66304399	299	hypo	0.205128	0.279188	0.344828	0.983051	0.72973	0.716667	0.282407	0.276596	0.356436	0.444444	0.8125	0.5	0.333333	0.180556	0.197708	0.187013	0.315385	0	0	0.0366972	0.0532544
CHHDMR	3136	Bd30-1.CHH	Bd1	66889500	66889699	199	hypo	1	0	1	0	NA	0.153846	0	0.533333	0.125	0.666667	0	NA	0.571429	0.166667	0.0459184	0.00531915	0.416667	0	1	0.291667	0.142857
CHHDMR	3212	Bd30-1.CHH	Bd1	68771900	68772199	299	hyper	0.944444	0.571429	0.925373	0.72	0.733333	0.700935	0.714286	0.835	0.74359	0.818182	0.911765	0.943396	0.827338	0.855072	0.059453	0.110638	0.035533	0.268156	0.121429	0.211845	0.135307
CHHDMR	3241	Bd30-1.CHH	Bd1	69441100	69441299	199	hypo	0.866667	0.92	0.951807	0.944444	0.956044	0.992366	0.980769	0.575	0.764706	0.638889	0.863636	0.939394	0.888889	0.854545	0.0929204	0	0.306265	0.0207254	0.0664653	0.0272374	0.104839
CHHDMR	3255	Bd30-1.CHH	Bd1	69803400	69803599	199	hyper	0.0784314	0.0833333	0.1	0.4	0.206897	0.266667	0.307692	0	0	0	0.111111	0	0	0	0.0581395	0.0502513	0.0172414	0.307018	0.04329	0.225641	0.101307
CHHDMR	3407	Bd30-1.CHH	Bd1	74201200	74201399	199	hyper	0.973684	0.757576	0.967742	0.931818	0.826087	0.612903	0.875	0.666667	0.666667	0.357143	0.705882	0.555556	0.521739	0.458333	0.140449	0.191781	0.0172414	0.46875	0.169811	0.293103	0.042735
CHHDMR	3427	Bd30-1.CHH	Bd1	74609800	74609999	199	hypo	0.95082	1	1	1	0.666667	1	0.956522	0.75	0.8	0.8125	0.896552	1	0.875	0.894737	0.0315399	0.0116959	0.212121	0.0138249	0.028169	0.0165746	0.056872
CHHDMR	3448	Bd30-1.CHH	Bd2	473200	473399	199	hyper	0	0	0	0.833333	0.0229885	0	0.0526316	0	0.0162602	0	0.681818	0.0135135	0.0238095	0	0.00241546	0.00546448	0.0272727	0.278075	0	0.00714286	0.0170213
CHHDMR	3504	Bd30-1.CHH	Bd2	2104400	2104599	199	hyper	NA	NA	NA	NA	NA	NA	NA	NA	NA	NA	NA	NA	NA	NA	0.122222	0.170213	0.0125	0.537313	0.461538	0.229008	0.254902
CHHDMR	3515	Bd30-1.CHH	Bd2	2468100	2468299	199	hyper	0.916667	1	1	1	0.947368	0.769231	1	1	0.6	0.75	1	0.935484	1	1	0.0961538	0.0952381	0.0212766	0.519231	0.0779221	0.0145985	0.0242424
CHHDMR	3521	Bd30-1.CHH	Bd2	2549400	2549599	199	hyper	0.903226	0.875	0.875	1	0.821429	0.75	0.75	0.75	0	0	NA	0	0	0.1	0.308057	0.312821	0.016	0.411765	0.181287	0.382979	0.17931
CHHDMR	3547	Bd30-1.CHH	Bd2	3571900	3572099	199	hypo	0.82	1	0.909091	1	0.75	0.777778	0.8	0.616667	0.268293	0.896552	0.378378	0.727273	0.659091	0.382353	0.0268949	0.0354331	0.218543	0.032	0.0210526	0.0196078	0.0633484
CHHDMR	3555	Bd30-1.CHH	Bd2	3764000	3764199	199	hypo	0.958333	0.936228	0.960465	0.985944	0.960294	0.97074	0.962398	0.735577	0.594444	0.736842	0.731579	0.7393	0.655172	0.736453	0.305921	0.139222	0.232843	0.0238095	0.0164835	0.132911	0.17847
CHHDMR	3567	Bd30-1.CHH	Bd2	4040600	4040799	199	hypo	0.854839	0.95302	0.968	0.833333	0.980769	0.910448	0.840678	0.766667	0.827586	0.892308	0.6875	1	0.72093	0.75	0.184466	0.167401	0.49835	0.0208333	0.294118	0.10929	0.254181
CHHDMR	3605	Bd30-1.CHH	Bd2	4981100	4981299	199	hyper	0.5	0.357143	1	1	0.857143	0.357143	0.666667	0.176471	0.434783	0.2	0.578947	0.470588	0.125	0.416667	0.119792	0.205882	0.0131579	0.237113	0.22449	0.030303	0.0775194
CHHDMR	3625	Bd30-1.CHH	Bd2	5503100	5503399	299	hyper	0.878788	0.987342	1	0.772152	0.911111	0.743902	0.786207	0.391304	0.780488	0.76	0.666667	0.87013	0.597701	0.642202	0.0200573	0.0559284	0.0230769	0.445969	0.516022	0.481669	0.481034
CHHDMR	3645	Bd30-1.CHH	Bd2	5838700	5838899	199	hypo	0.0887097	0.0773481	0.157143	0.0740741	0.113636	0.131868	0.103226	0.0196078	0.0265487	0.0545455	0	0.0606061	0.057971	0.0618557	0.0362694	0.044289	0.345455	0.0223881	0.122172	0.122363	0.125364
CHHDMR	3655	Bd30-1.CHH	Bd2	6012500	6012699	199	hyper	0	0	0	0.969697	NA	0.985294	0.166667	0.0147059	0	0	0.879699	0	0.653266	0.1	0	0.00684932	0	0.376997	0	0.5054	0.0384615
CHHDMR	3663	Bd30-1.CHH	Bd2	6252000	6252199	199	hyper	0.944444	1	0.913043	0.8	1	1	0.947368	0.790698	0.888889	0.837838	0.833333	0.8	0.852941	0.793103	0.0103627	0.0327103	0.0181818	0.454545	0.0186916	0.0211268	0.00740741
CHHDMR	3704	Bd30-1.CHH	Bd2	6974200	6974399	199	hypo	0.897059	0.780488	0.875	1	0.95122	0.788462	0.906667	0.190476	0.111111	0	0	0	0	0	0.0688525	0.131274	0.272727	0	0.271277	0.229437	0.212219
CHHDMR	3722	Bd30-1.CHH	Bd2	7333300	7333499	199	hypo	0.921053	0.92	0.923077	1	0.9375	0.941176	1	0.576471	0.693878	0.807692	0.888889	0.809524	0.825	0.680851	0.118003	0.171717	0.231707	0.0384615	0.270423	0.380531	0.295302
CHHDMR	3787	Bd30-1.CHH	Bd2	8527100	8527299	199	hyper	0.642857	0	1	1	0	0.5	0.111111	0.814815	0.909091	0.928571	0.9	1	0.888889	0.941176	0.00369004	0.0458716	0.0121951	0.333333	0	0.0254237	0.0539216
CHHDMR	3838	Bd30-1.CHH	Bd2	9380100	9380299	199	hypo	1	0.923077	1	1	0.4	0.916667	1	0.77551	0.888889	1	NA	NA	0.928571	1	0.185053	0.220339	0.706897	0	0.323077	0.216561	0.0493827
CHHDMR	3841	Bd30-1.CHH	Bd2	9463600	9463799	199	hypo	0	0.148148	0.75	0	0	0.846154	0	0	0.428571	0.791667	0	0	0.678571	0.0555556	0.00632911	0.288618	0.288043	0	0.0070922	0.346847	0
CHHDMR	3872	Bd30-1.CHH	Bd2	9951600	9951899	299	hyper	0.875	0.890244	0.880597	0.964286	0.972603	0.865854	0.861472	0	0.628571	0.777778	0.8	0.666667	0.52381	0.392857	0	0.0529248	0.0159574	0.37	0.07	0.0491329	0.295455
CHHDMR	3903	Bd30-1.CHH	Bd2	10567800	10567999	199	hypo	NA	0.204819	0.322034	0.0740741	0.34375	0.21519	0.163636	0	0.104167	0.0625	0.181818	0.0909091	0.037037	0.128205	NA	0.277228	0.48951	0.0319149	0.276243	0.4375	0.401515
CHHDMR	3976	Bd30-1.CHH	Bd2	11758600	11758799	199	hypo	0.710526	0.916667	0.811765	0.785714	0.0833333	0.174419	0.0840336	0.483871	0.490196	0.471429	0.3125	0.162162	0.197183	0.111111	0.323529	0.0377358	0.414634	0	0.240437	0.275862	0.17268
CHHDMR	3985	Bd30-1.CHH	Bd2	11882600	11882799	199	hyper	0.964912	0.906977	0.965517	1	0.932203	0.973451	1	0.368421	0.647059	0.636364	0.444444	0.405405	0.414634	0.478261	0.0372493	0.00865801	0	0.315152	0.00621118	0	0.0106383
CHHDMR	3988	Bd30-1.CHH	Bd2	11969100	11969299	199	hyper	0.926136	0.0136986	0.964912	0.722222	0.943925	0.961039	0.894737	0.502392	0	0.408451	0.698052	0.657778	0.563953	0.541667	0.0844794	0.0216216	0.0142857	0.365938	0.0339806	0.0275862	0.012848
CHHDMR	4011	Bd30-1.CHH	Bd2	12251800	12251999	199	hyper	0.8125	0.96748	0.955556	0.978417	0.880682	0.969697	0.84375	0.285714	0.368421	0.333333	0.625	0.571429	0.5	0.357143	0	0.0768398	0.0222222	0.249551	0.215686	0.0428016	0.0188679
CHHDMR	4082	Bd30-1.CHH	Bd2	14375200	14375399	199	hyper	0.969697	0.975666	0.996169	0.835821	0.943277	0.971464	0.98543	0.649425	0.502101	0.61194	0.6	0.666667	0.586035	0.686275	0.106762	0.224138	0.0175439	0.587302	0.0180723	0.416235	0.435233
CHHDMR	4106	Bd30-1.CHH	Bd2	14806800	14806999	199	hyper	0.976623	0.970534	0.987578	0.965649	0.956284	0.973412	0.966817	0.538462	0.787097	0.581395	0.736111	0.641509	0.720588	0.64467	0.0707763	0.0056338	0.00662252	0.263636	0.0432692	0.0682731	0.0583446
CHHDMR	4148	Bd30-1.CHH	Bd2	15898700	15898899	199	hyper	0.941176	0.941176	0.866667	1	1	0.9	0.846154	0.807692	0.882353	0.85	1	0.9	0.681818	0.886364	0.0295567	0.0148148	0.0235294	0.259259	0	0	0
CHHDMR	4167	Bd30-1.CHH	Bd2	16376300	16376499	199	hyper	0.297386	0.747036	0.386628	0.465608	0.846154	0.00787402	0.836207	0.0944882	0.629464	0.281513	0.395161	0.7	0.0227273	0.636364	0.00792393	0.0143043	0.0253807	0.409396	0.00499168	0.0135747	0.0114778
CHHDMR	4179	Bd30-1.CHH	Bd2	16603100	16603299	199	hypo	0.916667	0.882096	0.959732	0.985075	0.92	0.852349	0.847328	0.489796	0.583333	0.651163	0.9	0.836735	0.711111	0.492537	0.152727	0.247292	0.291785	0.0142857	0.343511	0.281977	0.30036
CHHDMR	4183	Bd30-1.CHH	Bd2	16686100	16686299	199	hypo	0.787611	0.959502	0.890411	0.965909	0.949333	0.650662	0.984085	0.298295	0.59322	0.531915	0.435407	0.862069	0.330171	0.736301	0.12532	0	0.339964	0.0204778	0.0114286	0.244983	0.0273556
CHHDMR	4222	Bd30-1.CHH	Bd2	17674700	17674899	199	hyper	1	0.956989	1	1	1	1	0.963415	0.492063	0.402778	0.555556	0.586207	0.5	0.535714	0.315789	0.00392157	0.0128755	0	0.255814	0.0295858	0.0159363	0.00896861
CHHDMR	4345	Bd30-1.CHH	Bd2	19987200	19987399	199	hyper	0	0.916667	1	0.9	1	0.878378	0.963636	0	0.571429	0.68	1	0.916667	0.767857	0.704545	0.0043573	0.0123457	0	0.407767	0.0571429	0.0726496	0.0506912
CHHDMR	4357	Bd30-1.CHH	Bd2	20194900	20195099	199	hyper	0.4	1	1	1	0.96	1	0.833333	0.676471	0.846154	0.921569	0.72	0.939394	0.666667	0.698795	0.229885	0.0101781	0.0427807	0.378947	0.00990099	0.150235	0.0693431
CHHDMR	4359	Bd30-1.CHH	Bd2	20260400	20260599	199	hypo	0.944	0.968085	1	1	0.977273	0.95122	0.973404	0.647059	0.626374	0.585366	0.69697	0.688889	0.5375	0.679775	0.0380952	0.0488889	0.392157	0.00588235	0	0.0357143	0.0233546
CHHDMR	4429	Bd30-1.CHH	Bd2	21631900	21632099	199	hyper	0.833333	1	1	1	1	0.923077	0.913043	0.285714	0.222222	0.5	0	1	0.4	0.28125	0.148936	0.150943	0.0122699	0.431373	0.117647	0.0483871	0.0195531
CHHDMR	4433	Bd30-1.CHH	Bd2	21702000	21702199	199	hypo	0.911765	0.976471	1	0.9375	0.983051	1	0.978723	0.791367	0.84375	0.653846	0.910714	0.963415	0.865922	0.87234	0.0611702	0.0700935	0.293023	0.0170455	0.0716846	0.0682927	0.0686275
CHHDMR	4437	Bd30-1.CHH	Bd2	21733400	21733599	199	hypo	0.962963	0.926901	1	0.981366	0.95082	0.930556	0.922865	0.413462	0.341991	0.658537	0.507463	0.487805	0.353535	0.428571	0.0873016	0.0338983	0.361111	0	0.0263158	0.0294118	0.0403587
CHHDMR	4463	Bd30-1.CHH	Bd2	22143100	22143299	199	hyper	0.981132	0.913793	0.846154	0.928571	1	1	1	0.421053	0.75	0.5	0.714286	0.5	0.888889	1	0.0207254	0.0655022	0.021978	0.293103	0.166667	0.0824742	0.0555556
CHHDMR	4464	Bd30-1.CHH	Bd2	22167200	22167399	199	hypo	0.96	1	0.928571	1	1	1	0.985915	0.62963	0.863636	0.888889	0.75	0.923077	0.76	0.772727	0.142857	0.0714286	0.285714	0	0.078125	0.0248447	0.118644
CHHDMR	4477	Bd30-1.CHH	Bd2	22464900	22465099	199	hyper	0.88	0.959184	1	1	1	1	1	0.52381	0.72	0.777778	0.909091	1	0.8	0.888889	0	0	0.0322581	0.419355	0	0.025974	0
CHHDMR	4594	Bd30-1.CHH	Bd2	24164100	24164299	199	hyper	0.920635	0.947368	1	1	1	0.956522	0.963415	0.538462	0.421053	0	0.529412	0.583333	0.428571	0.393939	0.0550847	0.0535714	0	0.318182	0.0181818	0.0257511	0.037037
CHHDMR	4635	Bd30-1.CHH	Bd2	24788200	24788399	199	hyper	0.939815	0.96	0.986111	1	0.978261	0.8875	0.991453	0.690141	0.803279	0.806452	1	0.84	0.818182	0.873016	0.0189873	0.0775623	0.0239234	0.361702	0.0694444	0.100917	0.0334821
CHHDMR	4660	Bd30-1.CHH	Bd2	25256200	25256399	199	hyper	0.949367	0.965517	1	1	1	1	0.95122	1	1	0.965517	1	1	1	1	0.0242718	0.0145985	0.00578035	0.301075	0	0.00888889	0.0292887
CHHDMR	4662	Bd30-1.CHH	Bd2	25302300	25302499	199	hypo	NA	NA	NA	NA	NA	NA	NA	1	0.862745	0.777778	1	1	0.948718	0.944444	0.188312	0.127155	0.357616	0.0238095	0.126506	0.124309	0.105747
CHHDMR	4666	Bd30-1.CHH	Bd2	25365000	25365199	199	hypo	1	0.975472	0.993827	0.978632	0.984348	0.972222	0.9632	0.444444	0.682692	0.89916	0.682779	0.844186	0.809211	0.375315	0.0722892	0.0352941	0.252809	0.00465116	0.015456	0.0232198	0.0224359
CHHDMR	4718	Bd30-1.CHH	Bd2	26253800	26253999	199	hyper	0.959064	0.842593	0.97619	0.818182	0.857143	0.932584	0.861842	0.75	0.873418	0.890625	1	1	0.902778	0.932584	0.0526316	0.0408163	0	0.238095	0	0.0510204	0.0608273
CHHDMR	4738	Bd30-1.CHH	Bd2	26544600	26544799	199	hyper	0.771084	0.503497	0	0.658537	0	0.666667	0.719298	0.237288	0.214286	0.0909091	0.575758	NA	0.395833	0.4	0.105417	0.301609	0.0253165	0.272727	0	0.315534	0.140036
CHHDMR	4752	Bd30-1.CHH	Bd2	26715900	26716199	299	hyper	0.00826446	0.0238095	0	0.272727	0.03125	0.012987	0	0.0111732	0.0102041	0	0.193548	0	0.0169492	0	0.0144092	0.00691244	0.00591716	0.295918	0.00947867	0.0084507	0.00925926
CHHDMR	4776	Bd30-1.CHH	Bd2	27249800	27249999	199	hypo	0.92233	0.946429	1	1	1	1	0.941176	0.797101	0.851485	0.924051	0.789474	0.907407	0.823232	0.786325	0.0828924	0.065445	0.243781	0.010989	0.027972	0.0618812	0.0162602
CHHDMR	4796	Bd30-1.CHH	Bd2	27711200	27711399	199	hypo	0.933333	1	0.888889	0.666667	NA	0.5	0.888889	0.365385	0.583333	0.631579	0.666667	0.7	0.4	0.457143	0.0495868	0.0909091	0.344444	0	0	0.172043	0.183673
CHHDMR	4806	Bd30-1.CHH	Bd2	28028000	28028199	199	hyper	1	1	1	1	1	1	1	0.842105	0.631579	0.882353	1	1	0.5	0.666667	0.0481283	0.0397351	0.0326087	0.291139	0.174242	0	0.104972
CHHDMR	4823	Bd30-1.CHH	Bd2	28240500	28240699	199	hyper	0.987342	0.984293	0.962264	0.8	1	0.943089	0.99005	0.64486	0.55814	0.578947	0.466667	0.431373	0.412698	0.616438	0.0191781	0.0209618	0	0.413333	0.0650407	0.0168675	0.0148662
CHHDMR	4872	Bd30-1.CHH	Bd2	29066900	29067099	199	hyper	0.950029	0.96473	0.95122	0.846154	0.946789	0.970588	0.969636	0.288	0.7	0.5	1	0.375	0.421053	0.704545	0.0132374	0.0375691	0.0124481	0.4	0.0204521	0.01	0.00862069
CHHDMR	4884	Bd30-1.CHH	Bd2	29310700	29310999	299	hyper	1	0.923077	1	1	1	NA	0.925	0.4	0.583333	0.6	1	0.742857	NA	0.701149	0.0121951	0	0	0.25	0.0165289	NA	0.0230179
CHHDMR	4889	Bd30-1.CHH	Bd2	29380400	29380599	199	hyper	0.937063	0.994792	0.93913	1	0.984709	1	0.991632	0.72	0.554348	0.588235	1	0.662162	0	0.727273	0.0616622	0.0245902	0.0113208	0.3	0.0188679	0	0.0724876
CHHDMR	4915	Bd30-1.CHH	Bd2	29985400	29985599	199	hypo	0.921053	0.886792	0.90566	0.866667	0.888889	0.924528	0.944882	0.879699	0.847458	0.896907	0.947368	0.95	0.897059	0.889764	0.228507	0.305623	0.236246	0.0204082	0.0165563	0.387097	0.388761
CHHDMR	4955	Bd30-1.CHH	Bd2	30767400	30767599	199	hyper	0.965347	0.960938	0.985294	0.588235	0.966667	0.977376	0.969136	0.238532	0.4875	0.673469	0.333333	0.623656	0.683099	0.568627	0.0143954	0.00369004	0.00507614	0.309392	0.0113379	0.0163577	0.0108696
CHHDMR	4958	Bd30-1.CHH	Bd2	30814000	30814199	199	hyper	1	1	0.8	1	1	1	0.928571	0.6	0.745455	0.913043	0.333333	0.96	0.6	0.929825	0.0405405	0.0168539	0.0316456	0.32	0.0784314	0.177419	0.0474041
CHHDMR	4980	Bd30-1.CHH	Bd2	31276300	31276499	199	hypo	0.953947	0.380165	0.589744	1	0.519231	0.970149	0.491228	0.674419	0.434524	0.519231	0.861111	0.618557	0.73494	0.666667	0.047486	0.18595	0.366906	0.0130719	0.337634	0.047619	0.225424
CHHDMR	4983	Bd30-1.CHH	Bd2	31318800	31318999	199	hyper	0.917808	1	1	1	1	1	0.962264	0.5	0.535714	0.666667	1	0.666667	0.75	0.588235	0.0325581	0.175141	0.0263158	0.375	0.271739	0.0862069	0.0573248
CHHDMR	4987	Bd30-1.CHH	Bd2	31375500	31375699	199	hyper	1	0.896552	1	1	0.857143	0.952381	0.981818	0.722222	1	1	0.875	0.909091	1	0.888889	0.0380952	0.0740741	0.0240964	0.267606	0.0264901	0.0619469	0.0913706
CHHDMR	4997	Bd30-1.CHH	Bd2	31535100	31535299	199	hyper	0.966292	0.932331	1	1	0.878788	0.948276	0.888	0.77907	0.635514	0.74359	0.730769	0.602273	0.575	0.518519	0.0306122	0.127027	0	0.322034	0.149425	0.167147	0.160121
CHHDMR	5003	Bd30-1.CHH	Bd2	31676300	31676499	199	hypo	0.941176	0.8	1	1	0.966667	0.962264	1	0.650794	0.568182	1	0.666667	0.727273	0.757576	0.807692	0.00581395	0.657778	0.695035	0	0.463415	0.0446927	0.0882353
CHHDMR	5099	Bd30-1.CHH	Bd2	33616900	33617099	199	hyper	0.857143	0.914894	1	0.666667	1	0.942857	0.941176	0.655172	0.677419	0.705882	0.4	1	0.853659	0.730769	0.243243	0.17561	0	0.358209	0.142857	0.20603	0.188976
CHHDMR	5109	Bd30-1.CHH	Bd2	33841900	33842099	199	hyper	0.909091	1	1	1	1	1	1	0.886957	0.940299	0.861111	0.846154	1	0.926471	0.961538	0.038874	0.00963855	0.00921659	0.393443	0.0229885	0.0153846	0.00819672
CHHDMR	5128	Bd30-1.CHH	Bd2	34166600	34166799	199	hypo	0.976608	0.710383	0.78	0.962963	0.854054	0.732323	0.770833	0.85625	0.685535	0.64	0.948718	0.891892	0.680851	0.696203	0.0245614	0.518433	0.702403	0.0383275	0.667742	0.59001	0.60154
CHHDMR	5133	Bd30-1.CHH	Bd2	34235400	34235599	199	hyper	0.75	0.339623	1	0.378378	1	0.333333	0.660714	0.666667	0.28	0.346154	0.2	0	0.181818	0.571429	0	0.148649	0.0136986	0.425532	0.181818	0.44186	0.203008
CHHDMR	5138	Bd30-1.CHH	Bd2	34307200	34307399	199	hyper	0	0.875	1	1	1	1	1	0	0.105263	0.105263	0.5	0.541667	0.181818	0.5	0.0405405	0	0	0.333333	0	0.0238095	0.047619
CHHDMR	5174	Bd30-1.CHH	Bd2	35009400	35009599	199	hypo	0.882353	0.964286	1	1	1	1	0.962963	0.1	0.2	0	0.285714	0.3	NA	0.571429	0.0296296	0.125	0.277778	0.0163934	0.404255	0	0.246914
CHHDMR	5178	Bd30-1.CHH	Bd2	35088600	35088799	199	hypo	0.967742	0.982877	0.946154	0.980392	0.877698	0.916667	0.990566	0.428571	0.699301	0.842697	0.835294	0.628205	0.571429	0.821429	0.129032	0.0408163	0.232955	0.0283688	0.032	0	0.00833333
CHHDMR	5210	Bd30-1.CHH	Bd2	35677100	35677299	199	hypo	0.980769	0.964286	1	0.8	1	0.964286	1	0.796296	0.65	0.904762	0.714286	0.863636	0.697674	0.648649	0.0767824	0.0351438	0.280702	0	0.118421	0.101124	0.0548523
CHHDMR	5297	Bd30-1.CHH	Bd2	37132900	37133099	199	hyper	0.993289	1	1	1	0.6	0.6	0.636364	0.857143	1	0.8125	0.5	0.666667	1	0.555556	0.0404255	0	0.0243902	0.285714	0.0576923	0.0253165	0.0487805
CHHDMR	5333	Bd30-1.CHH	Bd2	37888600	37888799	199	hyper	0.83871	0.966667	1	0.75	1	0.986842	0.815789	0	0.5	1	0	0.25	0.285714	0.428571	0.0211416	0.0368764	0.0166667	0.666667	0.040293	0.0144928	0.00833333
CHHDMR	5341	Bd30-1.CHH	Bd2	38140700	38140899	199	hypo	0.884615	0.466667	0.833333	0.981818	0.916667	0.75	0.789474	0.428571	0.849057	0.788462	0.208333	0.134615	0.283333	0.135593	0.0104167	0.39	0.360169	0.0393258	0.259259	0.415441	0.00306748
CHHDMR	5364	Bd30-1.CHH	Bd2	38485500	38485699	199	hypo	0.875	0.941176	0.882353	1	1	0.952381	0.8	0	0	0	0	0	0	0	0.111111	0.0714286	0.225806	0	0	0.101266	0.272727
CHHDMR	5376	Bd30-1.CHH	Bd2	38763600	38763799	199	hyper	NA	1	1	1	1	1	1	NA	1	0	1	1	0.6	1	NA	0.0637584	0	0.436364	0.166667	0.0145985	0.0720721
CHHDMR	5379	Bd30-1.CHH	Bd2	38825600	38825799	199	hyper	1	0.923077	0.952381	0.833333	1	0.966102	0.915254	0.512195	0.761194	0.588235	0.666667	0.791667	0.5	0.857143	0.0344828	0.00490196	0.0243902	0.25	0.0534759	0	0.00828729
CHHDMR	5384	Bd30-1.CHH	Bd2	39001000	39001199	199	hyper	0.916667	0.982833	0.956897	0.794872	0.882353	0.929907	0.94382	0.3	0.278107	0.370787	0.454545	0.203125	0.247525	0.186916	0.0196078	0.0894569	0	0.38	0.0215054	0.133333	0.0473934
CHHDMR	5429	Bd30-1.CHH	Bd2	40131900	40132099	199	hypo	0.94382	0.973684	0.985294	0.932	0.975439	0.962121	0.977157	0.73913	0.337209	0.9	0.830769	0.746667	0.734177	0.864	0.0161943	0.0337838	0.472973	0.00877193	0.0457516	0.0145631	0.236735
CHHDMR	5472	Bd30-1.CHH	Bd2	40876500	40876699	199	hypo	0.963855	0.990291	0.95122	1	0.931034	0.963636	0.956098	0.385714	0.55	0.633803	0.317073	0.552632	0.523256	0.692308	0.107579	0.153543	0.233333	0	0.195745	0.121951	0.390313
CHHDMR	5534	Bd30-1.CHH	Bd2	41842300	41842499	199	hypo	0.921569	0.966667	1	1	1	1	1	0.833333	0.555556	0.857143	0.833333	0.888889	0.6875	0.666667	0.0298507	0.025974	0.315789	0	0	0.0361446	0.030303
CHHDMR	5549	Bd30-1.CHH	Bd2	42166800	42166999	199	hypo	0.913386	0.311688	0.458824	0.315789	0.5	0.445652	0.414474	0.231884	0.130435	0.131579	0.142857	0.132075	0.0980392	0.131579	0.0368906	0.0567376	0.348039	0	0.153488	0.131868	0.136986
CHHDMR	5550	Bd30-1.CHH	Bd2	42176100	42176299	199	hyper	0.840909	0	0.723684	0.727273	0.67	0.940299	0.87037	0.416667	0	0.464789	0.642857	0.410714	0.628319	0.69697	0.0358362	0	0.0261097	0.47619	0.0143369	0.041868	0.268293
CHHDMR	5575	Bd30-1.CHH	Bd2	42467100	42467299	199	hyper	0.857143	1	1	1	NA	1	1	0	0	0	0	NA	0	0.5	0.0125	0	0	0.357143	0	0	0
CHHDMR	5594	Bd30-1.CHH	Bd2	42739000	42739199	199	hypo	0.989796	0.961905	0.972973	0.954545	0.955556	0.974359	1	0.780822	0.933333	0.854167	0.866667	0.893617	0.886792	0.938462	0.0374332	0.0698324	0.305882	0.0283019	0.139175	0.0751634	0.127479
CHHDMR	5634	Bd30-1.CHH	Bd2	43428100	43428299	199	hypo	0.965714	0.455285	0.5	0.948454	0.142857	0.475524	0.357616	0.574359	0.509804	0.522523	0.832	0	0.456731	0.402597	0.0915713	0.451053	0.49892	0.0417537	0.0505051	0.442387	0.399582
CHHDMR	5657	Bd30-1.CHH	Bd2	43731400	43731599	199	hypo	0.714286	0.8	1	1	1	1	1	0.375	0.388889	0.777778	0.5	0.333333	0.615385	0.8	0.0625	0.101796	0.333333	0	0.0454545	0.0689655	0.108434
CHHDMR	5675	Bd30-1.CHH	Bd2	44126300	44126499	199	hyper	NA	NA	NA	NA	NA	NA	NA	0.95	0.909091	1	1	0.952381	1	0.934783	0.0619469	0.0680851	0.0333333	0.275862	0	0.00581395	0.0762463
CHHDMR	5696	Bd30-1.CHH	Bd2	44772800	44772999	199	hyper	NA	NA	NA	NA	NA	NA	NA	0.928571	0.833333	1	NA	NA	0.888889	1	0.00416667	0.0725806	0.00952381	0.25	0.05	0.0321285	0.0278884
CHHDMR	5734	Bd30-1.CHH	Bd2	45589800	45589999	199	hypo	0.602273	0.460317	0.467532	0.73913	0.333333	0.130435	0.375	0.220339	0.296296	0.397059	0.690476	0.538462	0.16129	0.472222	0.0731707	0.264822	0.243421	0.027027	0.153846	0.209677	0.244186
CHHDMR	5747	Bd30-1.CHH	Bd2	45890400	45890599	199	hypo	0.82	0.641509	0.878788	1	0.783784	0.791667	0.722222	0	0.125	0	0.333333	0.333333	0.5	0	0.0891473	0.0150376	0.44375	0	0.0695187	0.125	0.209059
CHHDMR	5758	Bd30-1.CHH	Bd2	46066500	46066699	199	hyper	0.928571	0.953125	1	1	1	1	0.944444	0.514706	0.954545	0.9	1	1	0.555556	0.85	0.00581395	0	0.0105263	0.272727	0	0.1	0.0212766
CHHDMR	5892	Bd30-1.CHH	Bd2	48609000	48609199	199	hypo	0.960452	0.930818	0.992991	0.972015	0.97931	0.97542	0.966175	0.624665	0.665217	0.876106	0.831169	0.827586	0.820738	0.842605	0.0893099	0.00539084	0.211268	0.0106667	0.00406504	0.162903	0.214848
CHHDMR	5921	Bd30-1.CHH	Bd2	49450100	49450299	199	hyper	1	1	1	1	1	0.8	1	0.6	0.75	0.375	1	0.533333	0.75	0.8	0	0.083871	0	0.4	0	0.118644	0
CHHDMR	5940	Bd30-1.CHH	Bd2	49918500	49918699	199	hypo	0.916667	0.930233	0.983871	0.950617	0.947761	0.925	0.892308	0.754545	0.633028	0.849057	0.777778	0.75	0.571429	0.77907	0.265306	0.128205	0.262774	0.0348837	0.288462	0.441558	0.154762
CHHDMR	5942	Bd30-1.CHH	Bd2	49949700	49949999	299	hyper	0.970213	0.973684	0.973913	0.990991	0.993421	0.974576	0.971246	0.756522	0.823009	0.85	0.846154	0.758929	0.8	0.806691	0.0412668	0.153648	0.0426439	0.358916	0.161736	0.148148	0.134021
CHHDMR	6080	Bd30-1.CHH	Bd2	53022500	53022699	199	hyper	0.96875	0.977273	0.952381	0.75	1	1	1	0.80198	0.732143	0.837838	1	0.933333	0.723684	0.830189	0.0134933	0.0139373	0.00507614	0.44186	0.0310881	0.0292398	0.0109091
CHHDMR	6100	Bd30-1.CHH	Bd2	53670100	53670299	199	hypo	0.523316	0.276786	0.672414	0.708861	0.927419	0.378947	0.708333	0.240506	0.119048	0.210526	0.428571	0.62069	0.325581	0.419355	0.0526316	0.128631	0.255319	0.0231214	0.0805556	0.182759	0.0276498
CHHDMR	6110	Bd30-1.CHH	Bd2	53816000	53816199	199	hypo	0	0	0.89899	NA	NA	0.327273	0	0.0196078	0.0277778	0.586207	0.25	NA	0.015625	0	0.00471698	0	0.276243	0	NA	0	0
CHHDMR	6122	Bd30-1.CHH	Bd2	54199400	54199599	199	hypo	0.959184	0.954128	0.870968	1	1	0.975309	0.965909	0.54902	0.194444	0.1	0.857143	0.538462	0.423077	0.5	0.202703	0.222222	0.473282	0	0.395349	0.288026	0.152941
CHHDMR	6146	Bd30-1.CHH	Bd2	54944600	54944799	199	hypo	0.777778	0	0.733333	0	0.767442	NA	NA	0.176471	0	0.576923	NA	0.488372	NA	NA	0.138122	0.0136986	0.348837	0	0.171329	0	NA
CHHDMR	6223	Bd30-1.CHH	Bd2	57164800	57164999	199	hypo	0.825	0.83871	0.904762	1	1	0.75	0.847826	0.676471	0.7	0.8	0.333333	1	0.833333	0.8	0.296137	0.0514706	0.367647	0.0277778	0.0689655	0.0204082	0.180556
CHHDMR	6227	Bd30-1.CHH	Bd2	57320100	57320299	199	hyper	0.926471	0.911765	1	0.974359	0.957447	0.893617	0.952381	0.383333	0.233333	0.391304	0.3	0.541667	0.486486	0.268293	0.0954064	0.175676	0	0.211009	0.179348	0.128834	0.0782396
CHHDMR	6233	Bd30-1.CHH	Bd2	57554300	57554499	199	hyper	1	0.724138	1	0.944444	1	0.970588	0.959596	0.857143	1	0.625	0.8	1	0.545455	0.875	0.0140845	0.0357143	0.0333333	0.316667	0.0860215	0.0371622	0.0410256
CHHDMR	6284	Bd30-1.CHH	Bd2	58913900	58914099	199	hyper	0.8375	0.935252	0.913043	0.985294	0.769231	1	0.881944	0.53125	0.20339	0.25	0.588235	0	0.75	0.253968	0.158621	0.204698	0.027027	0.3	0.0714286	0	0.145329
CHHDMR	6310	Bd30-1.CHH	Bd3	587400	587599	199	hypo	NA	1	0.84	1	1	NA	0.909091	NA	0.5	1	1	1	NA	0.833333	0	0.0866667	0.439759	0.0227273	0.0246914	0	0.16568
CHHDMR	6383	Bd30-1.CHH	Bd3	2303400	2303599	199	hypo	0.886364	0.977273	0.97931	0.96139	0.963303	0.666667	0.966292	0.910448	0.811966	0.782609	0.738397	0.896714	0.674157	0.777555	0	0.32321	0.763066	0.0235849	0.495968	0.0386473	0.357791
CHHDMR	6386	Bd30-1.CHH	Bd3	2367200	2367499	299	hyper	0.818182	0.944828	0.969231	1	0.869565	1	0.813559	0.764706	0.862745	1	0.933333	0.861111	0.885714	0.882353	0.15507	0.0839223	0.0406321	0.266791	0.0552764	0.0679095	0.110879
CHHDMR	6400	Bd30-1.CHH	Bd3	2617900	2618099	199	hyper	0.520833	1	1	1	0.581395	0	1	0	0.943925	0.967391	0.907801	0.729412	0	0.0136986	0.00842359	0.0160643	0.0224719	0.35591	0.0097561	0	0.00455581
CHHDMR	6405	Bd30-1.CHH	Bd3	2751200	2751399	199	hyper	0.769231	1	1	0	1	1	0.857143	0.652174	0.794872	0.75	0.666667	0.75	0.673469	0.692308	0.0565553	0.0677966	0.0111732	0.533333	0	0.0231481	0
CHHDMR	6533	Bd30-1.CHH	Bd3	5622100	5622399	299	hyper	0	0	0	0.923077	0.777778	0	0	0.0192308	0	0	0.615385	0.678571	0	0	0.00516796	0	0	0.607595	0.505263	0	0
CHHDMR	6561	Bd30-1.CHH	Bd3	6599200	6599399	199	hyper	1	0.52	1	1	0.5	0.981818	0.8	NA	0.285714	0.333333	0.875	0	0.611111	0.666667	0	0.157895	0	0.479167	0	0.105769	0.833333
CHHDMR	6570	Bd30-1.CHH	Bd3	6730600	6730799	199	hyper	1	1	1	1	0.95122	1	0.933333	1	0.774194	0.833333	0.782609	0.85	0.875	0.566667	0.392405	0.0977654	0	0.221154	0.275701	0.273224	0.072
CHHDMR	6580	Bd30-1.CHH	Bd3	7055100	7055299	199	hyper	0.6	0.972067	0.927536	0.962963	0.972973	0.903614	0.945055	0.0967742	0.553191	0.58	0.596774	0.837838	0.53125	0.554745	0.0722892	0.0403509	0.0294118	0.367713	0.0765306	0.0939597	0.0712025
CHHDMR	6607	Bd30-1.CHH	Bd3	7498300	7498499	199	hyper	0.865979	0.961538	0.966667	0.666667	0.958333	0.985612	0.731707	0.512821	0	0.611111	0.746988	0.34375	0.524272	0.290323	0.151899	0.0142857	0	0.22043	0.012987	0.027972	0.027027
CHHDMR	6651	Bd30-1.CHH	Bd3	8181000	8181199	199	hypo	0.878173	0.826347	0.867347	0.5	0.87574	0.837209	0.84375	0.603015	0.581395	0.681159	0.666667	0.7	0.357143	0.446809	0.335121	0.368329	0.410635	0	0.327287	0.302932	0.286127
CHHDMR	6724	Bd30-1.CHH	Bd3	9267800	9267999	199	hyper	0	0	0	1	0	0	NA	0.4125	0.428571	0.64557	0.925	0.782609	0.802326	0.647619	0.00806452	0.0398406	0.0219298	0.367521	0.0163934	0.0714286	0.0174927
CHHDMR	6749	Bd30-1.CHH	Bd3	9790000	9790299	299	hypo	0.6875	0.936508	0.930233	0.961039	1	0.917808	0.901099	0.8125	0.892857	0.924528	0.981481	0.947826	0.795918	0.77451	0.0419907	0.0270701	0.21308	0.0207254	0.145482	0.143062	0.0792181
CHHDMR	6761	Bd30-1.CHH	Bd3	9994100	9994299	199	hyper	1	1	1	1	NA	1	0.888889	0	0	0	NA	0	0	0	0.0181818	0	0	0.323529	0.12	0	0.0078125
CHHDMR	6765	Bd30-1.CHH	Bd3	10063400	10063599	199	hyper	0.875	0.979592	0.979592	0.943396	0.909091	0.851351	0.97541	1	0.523077	0.65	0.933333	0.709091	0.818182	0.581395	0.0138889	0.0106007	0.00694444	0.302632	0.0945274	0.102941	0.0117647
CHHDMR	6766	Bd30-1.CHH	Bd3	10063800	10064099	299	hyper	0.666667	0.956098	0.985185	0.98	0.983122	0.969298	0.993421	0.571429	0.755556	0.809524	0.976048	0.893855	0.729885	0.763393	0	0.0138018	0	0.359392	0.0130862	0.00668449	0.0160473
CHHDMR	6778	Bd30-1.CHH	Bd3	10380700	10380899	199	hyper	0.866667	1	1	0.5	1	0.333333	0	0.592593	0.5625	0.947368	0	0.923077	0.264706	0.181818	0.008	0	0.00743494	0.294118	0.0197044	0.201493	0.26257
CHHDMR	6788	Bd30-1.CHH	Bd3	10549600	10549799	199	hyper	1	0.882353	1	1	1	1	0.961538	0.804348	0.818182	0.809524	1	0.666667	0.825243	0.755319	0.0049505	0.022293	0.019305	0.263158	0.0576923	0.0468227	0.024948
CHHDMR	6789	Bd30-1.CHH	Bd3	10599400	10599599	199	hyper	NA	0.946108	1	0.983333	0.946058	0.959641	0.972028	NA	0.240741	0.576923	0.75	0.274194	0.340909	0.518519	NA	0	0.0163934	0.410256	0	0.00970874	0
CHHDMR	6793	Bd30-1.CHH	Bd3	10744800	10744999	199	hypo	0.898734	0.984615	0.994118	0.901961	0.983122	0.987805	0.923077	0.888889	0.412698	0.86	0.419355	0.682927	0.541284	0.419847	0.15	0.011236	0.583333	0	0.0344828	0.152866	0.00584795
CHHDMR	6798	Bd30-1.CHH	Bd3	10914400	10914599	199	hyper	0.961538	1	1	NA	1	0.8	0.833333	1	1	1	1	NA	1	1	0.237288	0.13	0	0.552632	0	0.104762	0.246988
CHHDMR	6801	Bd30-1.CHH	Bd3	10959500	10959699	199	hyper	NA	0.916667	NA	1	1	1	1	NA	NA	NA	NA	NA	NA	NA	0	0.0568182	0.0166667	0.287671	0.0606061	0.115385	0.22314
CHHDMR	6822	Bd30-1.CHH	Bd3	11612100	11612299	199	hyper	0.470588	0.81761	0.990654	0.428571	0.55102	0.443478	0.377483	0.177419	0.434783	0.597701	0.341463	0.307692	0.253012	0.245455	0.0585774	0.0340681	0.00404858	0.285714	0.0704225	0.245763	0.105376
CHHDMR	6829	Bd30-1.CHH	Bd3	11771500	11771699	199	hyper	0.957447	0.94902	0.98	0.967273	0.977273	0.966767	0.954351	0.53125	0.769912	0.8125	0.892562	0.878261	0.75	0.767956	0	0.00228833	0.00581395	0.632319	0	0.0100503	0.394015
CHHDMR	6915	Bd30-1.CHH	Bd3	14045600	14045799	199	hyper	0.97191	0.970588	0.96875	1	1	1	0.927632	0.630952	0.545455	0.612903	0.75	0.772727	0.388889	0.472222	0.014652	0.0376176	0	0.298246	0.0219298	0.0335196	0.027027
CHHDMR	6990	Bd30-1.CHH	Bd3	15293300	15293499	199	hypo	1	0.908007	0.980315	0.893594	0.934944	0.931992	0.926749	NA	0.675799	0.648148	0.788162	0.756345	0.655582	0.757143	0	0.094186	0.293286	0.00793651	0.110638	0.047561	0.240076
CHHDMR	6997	Bd30-1.CHH	Bd3	15469500	15469699	199	hypo	0.904762	0.957746	0.894737	1	1	0.947368	0.967742	0.45	0.380952	0.222222	0	0.5	0.6875	0.625	0.00917431	0.0178571	0.275862	0	0.0519481	0	0.0275229
CHHDMR	7008	Bd30-1.CHH	Bd3	15648900	15649099	199	hypo	0.888889	0.981343	0.979167	0.957219	0.962099	0.907104	0.933985	0.0958904	0.423237	0.824742	0.589888	0.699088	0.391667	0.375297	0	0.00259067	0.416667	0	0.00294118	0.326252	0.199774
CHHDMR	7022	Bd30-1.CHH	Bd3	15878800	15878999	199	hyper	0.980769	0.989362	1	0.977273	1	1	0.958333	0.748252	0.67713	0.697917	0.575	0.6375	0.618056	0.688442	0.0186722	0.0984081	0.0171821	0.225	0.0915493	0.0186916	0.0309119
CHHDMR	7040	Bd30-1.CHH	Bd3	16332400	16332599	199	hypo	0.921875	0.95122	1	1	1	0.945455	0.96	0	0.0416667	0	1	0.0769231	0.0714286	0	0.00877193	0.0301205	0.234043	0	0	0.0075188	0.0186047
CHHDMR	7088	Bd30-1.CHH	Bd3	17283200	17283399	199	hypo	0.9125	0.875	0.886364	1	0.972222	0.785714	0.951613	0	0.7	0.571429	0.333333	0.75	0.6	0.75	0.17759	0.217195	0.507299	0.0333333	0.309524	0.366834	0.273713
CHHDMR	7101	Bd30-1.CHH	Bd3	17584600	17584799	199	hypo	0	0.0227273	0.191489	0	0.0526316	0	0	0	0.0166667	0.294118	0.0333333	0.0740741	0.0638298	0.0697674	0	0.00421941	0.273128	0	0	0	0.027972
CHHDMR	7128	Bd30-1.CHH	Bd3	18174200	18174399	199	hyper	0.978261	0.924051	0.970588	0.944444	1	0.981818	0.9375	0.655556	0.757282	0.575	0.9	0.826087	0.674419	0.714286	0.014068	0.00940071	0.0331126	0.210526	0.027972	0.0240642	0.00796813
CHHDMR	7159	Bd30-1.CHH	Bd3	18707100	18707299	199	hypo	0.809524	0.962617	0.979695	0.928571	0.853333	0.925926	0.881119	0.55	0.397059	0.591667	0.535714	0.5	0.475177	0.431818	0	0.0091954	0.336406	0.0222222	0	0.0446097	0.0290909
CHHDMR	7182	Bd30-1.CHH	Bd3	19126900	19127099	199	hyper	0.818182	0.823529	0.923077	1	1	0.678571	0.824561	0.138889	0.0681818	0.125	0.958333	0.810811	0.375	0.247312	0.0287206	0.0360825	0	0.398496	0.104046	0.00671141	0.0587045
CHHDMR	7198	Bd30-1.CHH	Bd3	19474800	19474999	199	hypo	0.644444	0.564103	1	0.818182	0.973684	0.864865	0.947368	0.269231	0.136364	0.5	0.473684	0.686275	0.5	0.711538	0.323404	0.458549	0.430556	0.0217391	0.175	0.107345	0.136986
CHHDMR	7204	Bd30-1.CHH	Bd3	19604100	19604399	299	hyper	0.869792	0.960396	1	0.857143	0.960526	0.897436	0.915888	0.541667	0.5625	0.357143	0.235294	0.5625	0.538462	0.6	0.250482	0.0240964	0.00877193	0.463636	0.142857	0.0548387	0.0083682
CHHDMR	7209	Bd30-1.CHH	Bd3	19699500	19699699	199	hyper	0.981818	0.941176	1	1	0.88	0.965517	0.916667	0.605263	0.45	0.444444	0.714286	0.545455	0.470588	0.387097	0.13211	0.0188679	0.0336134	0.362573	0.296443	0.157895	0.0921502
CHHDMR	7224	Bd30-1.CHH	Bd3	20047400	20047599	199	hyper	1	1	1	NA	1	1	1	0.642857	0	0	0.5	1	0.578947	0	0.259259	0.136364	0	0.303797	0.5625	0.238806	0.588235
CHHDMR	7245	Bd30-1.CHH	Bd3	20659000	20659199	199	hypo	0.826531	0.659574	0.776978	0.958333	0.794118	0.507692	0.205479	0.636364	0.41629	0.458904	0.914286	0.62069	0.233766	0.134021	0.428969	0.534685	0.575488	0.0260116	0.105769	0.314421	0.260054
CHHDMR	7296	Bd30-1.CHH	Bd3	21574800	21574999	199	hypo	0.951351	0.853448	0.946429	0.896552	0.776119	0.967742	0.941176	0.892562	0.66443	0.807692	0.897436	0.727273	0.783505	0.679245	0.0511073	0.476879	0.3	0.0215054	0.526627	0.395604	0.223881
CHHDMR	7322	Bd30-1.CHH	Bd3	22062100	22062299	199	hyper	0.851064	0.465909	0.826923	0.788462	0.890173	0.952381	0.893333	0.344828	0.163265	0.230769	0.54717	0.376404	0.586957	0.482759	0.0207156	0.0416667	0.00775194	0.301887	0.0364683	0.0204499	0.0369718
CHHDMR	7337	Bd30-1.CHH	Bd3	22268500	22268699	199	hypo	0.969863	0.985401	0.990453	0.951662	0.970297	0.976161	0.979925	0.604027	0.835294	0.523297	0.747826	0.94964	0.556277	0.59375	0.147445	0.00874636	0.303097	0.00484262	0	0.00913242	0.0819304
CHHDMR	7340	Bd30-1.CHH	Bd3	22311900	22312099	199	hyper	NA	NA	1	1	NA	1	1	NA	NA	NA	NA	NA	NA	NA	0.128028	0.156934	0.015625	0.222749	0.3125	0.153425	0.078534
CHHDMR	7371	Bd30-1.CHH	Bd3	22839200	22839399	199	hyper	0.842105	0.962963	0.96	0.923077	0.965517	0.888889	0.888889	0.434783	0.571429	0.866667	0.6	0.428571	0.5	0.6	0.0165877	0.00647249	0.0179211	0.290909	0.0308219	0.00325733	0.0354331
CHHDMR	7380	Bd30-1.CHH	Bd3	23108400	23108599	199	hyper	0.928571	0.977273	1	0.9	1	1	0.90625	0.533333	0.78125	0.8	0.583333	0.935484	0.642857	0.882353	0.0821918	0.0193548	0.0135135	0.261538	0	0.0238095	0.013245
CHHDMR	7382	Bd30-1.CHH	Bd3	23180100	23180299	199	hypo	0.956386	0.973958	0.980769	0.958549	0.980978	0.973684	0.986945	0.8	0.865385	0.890411	0.916084	0.868132	0.850187	0.901961	0.00705882	0.148541	0.34375	0	0.00334448	0	0.0027248
CHHDMR	7388	Bd30-1.CHH	Bd3	23290700	23290899	199	hyper	0.876033	0	0	0.888889	0	NA	NA	0.353612	0	0	0.724138	0.0240964	NA	NA	0.0388199	0.00647948	0	0.257143	0.0104167	NA	NA
CHHDMR	7447	Bd30-1.CHH	Bd3	24693200	24693399	199	hyper	0.97561	0.931034	1	1	0.833333	0.983051	0.972222	0.0277778	0	NA	0	0.5	0.48	0.1875	0.0686016	0.0721649	0	0.288618	0.12766	0.306383	0.120996
CHHDMR	7460	Bd30-1.CHH	Bd3	25066700	25066899	199	hypo	0.909091	0.931034	0.904762	0.888889	0.964286	0.956522	0.923077	0.333333	0.5	0.5	0.666667	0.5	1	0	0.0387097	0.153846	0.272727	0	0.24581	0.493506	0.384615
CHHDMR	7462	Bd30-1.CHH	Bd3	25091500	25091699	199	hyper	0.868421	0.875	0.888889	1	1	0.823529	0.857143	0.8	0.769231	0.857143	1	1	1	0.875	0.01417	0	0.0110497	0.307692	0.04	0	0.0695187
CHHDMR	7468	Bd30-1.CHH	Bd3	25241400	25241599	199	hyper	0.764706	0.933266	0.956472	0.844828	0.94152	0.595238	0.777778	0.383178	0.533049	0.549296	0.659091	0.583333	0.439394	0.459459	0.0205339	0.0229582	0.0300375	0.260355	0.0391304	0.0367347	0.105058
CHHDMR	7495	Bd30-1.CHH	Bd3	25583400	25583599	199	hyper	0.142857	0.121212	0.125	1	0.285714	0.481481	0.391304	0	0.0882353	0.125	0.857143	0	0.0714286	0.0416667	0	0.0106383	0	0.423077	0.0139535	0.05	0
CHHDMR	7504	Bd30-1.CHH	Bd3	25637000	25637199	199	hyper	0.963855	0.970588	1	1	1	1	1	0.666667	0.666667	0.5	1	0.692308	NA	NA	0.00369004	0.0164835	0	0.25	0.025641	0	0.142857
CHHDMR	7546	Bd30-1.CHH	Bd3	26334800	26334999	199	hyper	0.968504	0.880435	0.984127	0.962963	0.976378	0.952096	0.895105	0.822581	0.721805	0.74359	0.818182	0.887097	0.68	0.712329	0.0216049	0.0431818	0.0264901	0.306122	0.101818	0.128852	0.0972763
CHHDMR	7553	Bd30-1.CHH	Bd3	26410200	26410399	199	hypo	1	1	1	1	1	0.917808	0.967742	0.768421	1	0.833333	0.65	0.923077	0.782609	0.866667	0.0134228	0.025	0.4	0.0227273	0	0.0135135	0.0276923
CHHDMR	7581	Bd30-1.CHH	Bd3	27023800	27023999	199	hypo	0.702128	0.846154	0.8	1	0.888889	0.727273	0.5	0.261905	0.3	0.4375	0.5	0.507246	0.454545	0.666667	0.195652	0.261261	0.357664	0	0.334507	0.204545	0.166667
CHHDMR	7585	Bd30-1.CHH	Bd3	27095000	27095199	199	hyper	0.956522	0.869565	0.952381	0.727273	0.89011	0.940741	0.955056	0.569444	0.566667	0.625	0.931034	0.736842	0.826923	0.666667	0.0527241	0.071066	0.0414508	0.280576	0.0537634	0.121528	0.0675676
CHHDMR	7596	Bd30-1.CHH	Bd3	27406900	27407099	199	hypo	1	0.933333	1	0.6	0.947368	1	0.846154	0.461538	0.166667	0.333333	0.5	0.285714	0	0	0.0568182	0.121212	0.306122	0	0.146853	0.0763359	0.0588235
CHHDMR	7612	Bd30-1.CHH	Bd3	27762000	27762199	199	hypo	0.807692	0.8	0.9	1	1	0.875	0.888889	0.466667	0.5	0.652174	1	NA	0.633333	0.538462	0.258741	0.0882353	0.287037	0	0.333333	0.173228	0.25
CHHDMR	7631	Bd30-1.CHH	Bd3	28145900	28146099	199	hyper	0.987179	0.950549	1	0.901639	0.974684	0.921875	0.962406	0.6	0.747967	0.717949	0.865854	0.918367	0.828947	0.60241	0.0903427	0.0994152	0.028777	0.410256	0.301775	0.275261	0.0237154
CHHDMR	7636	Bd30-1.CHH	Bd3	28195600	28195799	199	hypo	0.960938	0.982143	0.969388	1	NA	0.972973	0.96904	0.393617	0.533835	0.735294	0.8	NA	0.771186	0.644737	0.176849	0.490463	0.418994	0	NA	0.556982	0.336364
CHHDMR	7637	Bd30-1.CHH	Bd3	28213600	28213799	199	hyper	0	0	0	0.333333	0	0	0.0408163	0	0	0	0.475	0	0	0.0178571	0	0.0100402	0.00364964	0.339572	0	0	0
CHHDMR	7641	Bd30-1.CHH	Bd3	28326400	28326599	199	hyper	0.977778	0.958904	0.978261	0.5	0.85	0.88	0.963415	0.540984	0.777778	0.428571	0.333333	0.689655	0.305556	0.430769	0.00986842	0.00729927	0.0215827	0.333333	0.025641	0	0.00600601
CHHDMR	7674	Bd30-1.CHH	Bd3	28782700	28782899	199	hypo	0.772727	0.655172	0.777778	0.2	0	0.666667	0.830189	0.25	0	0.111111	0	0.0909091	0.321429	0.0740741	0.0617284	0.1375	0.287179	0	0.185792	0.441296	0.144
CHHDMR	7676	Bd30-1.CHH	Bd3	28863500	28863699	199	hypo	0.962085	0.949153	1	1	0.966292	0.947368	0.937888	0.8	0.738462	0.811321	0.710526	0.766667	0.7173	0.833333	0.0184758	0.221277	0.247748	0.0194175	0.129032	0.177333	0.127869
CHHDMR	7677	Bd30-1.CHH	Bd3	28889200	28889499	299	hypo	1	0.934579	1	0.952381	0.95082	1	0.957447	0.777778	0.875	1	0.833333	0.972222	0.96	0.903226	0.015748	0.193548	0.36	0.0113636	0.381963	0.133676	0.188213
CHHDMR	7698	Bd30-1.CHH	Bd3	29206200	29206399	199	hypo	1	0.970588	0.904762	1	0.944444	1	0.942308	0.913043	0.921739	0.945455	1	0.97561	0.927536	0.883212	0.050173	0.153846	0.287879	0	0.0363636	0.0258621	0.107417
CHHDMR	7702	Bd30-1.CHH	Bd3	29287000	29287199	199	hypo	0.99422	0.989474	1	0.958904	1	0.959459	0.94958	0.909836	0.906977	0.90625	0.897436	0.954128	0.909091	0.874016	0.202532	0.312039	0.294737	0.0392157	0.154472	0.203704	0.332418
CHHDMR	7714	Bd30-1.CHH	Bd3	29487100	29487299	199	hyper	0.968254	NA	0.941176	1	NA	0.952381	0.979381	0.617021	NA	0.423077	0.888889	NA	0.855556	0.573529	0.0236967	NA	0	0.245902	NA	0.0775862	0.185567
CHHDMR	7728	Bd30-1.CHH	Bd3	29719100	29719299	199	hyper	0.90625	0.952381	1	0.954545	1	0.941176	1	0.428571	0.387097	0.3125	0.433333	0.357143	0.315789	0.4	0.0964467	0.00961538	0.0150376	0.300926	0.0620155	0.0116959	0.00746269
CHHDMR	7735	Bd30-1.CHH	Bd3	29793400	29793599	199	hyper	0.8	0.666667	1	1	1	0.8	0.857143	0.5	NA	0.666667	0	0.333333	1	1	0.0606061	0.0512821	0	0.425	0.333333	0.254902	0.218182
CHHDMR	7740	Bd30-1.CHH	Bd3	29937600	29937799	199	hyper	0.942308	0.9	0.980392	1	1	0.966667	0.97619	0.52381	0.5	0.647059	0.2	0.666667	0.454545	0.580645	0.0638821	0.097561	0.00680272	0.266667	0.235294	0.0357143	0.0182927
CHHDMR	7746	Bd30-1.CHH	Bd3	30055800	30055999	199	hyper	0.625	0.8	0.95	0.666667	0.777778	0.368421	0.753247	0.227723	0.607955	0.931034	0.5	0.610169	0.263158	0.338346	0.128852	0.412548	0	0.44697	0.237624	0.172185	0.253731
CHHDMR	7750	Bd30-1.CHH	Bd3	30135600	30135799	199	hyper	0.688312	0.65678	0	0.854369	0.0217391	0.760638	0.794613	0.462687	0.5625	0	0.875	0	0.678947	0.672464	0.0642857	0.0878113	0	0.295139	0	0.131313	0.165005
CHHDMR	7772	Bd30-1.CHH	Bd3	30707000	30707199	199	hypo	0.344371	0.519084	0.368159	0.969512	0.530364	0.291667	0.314917	0.447059	0.515152	0.411348	0.826446	0.630542	0.439655	0.382979	0.209302	0.104235	0.344444	0.016129	0.343669	0.142012	0.169255
CHHDMR	7808	Bd30-1.CHH	Bd3	31465800	31465999	199	hyper	0.73913	1	1	0.863636	0.738095	1	1	0.142857	0.75	0.166667	0.5	0.409091	0.454545	0.3125	0.130952	0.0222222	0.0155039	0.267717	0.265306	0.0449438	0.0372671
CHHDMR	7811	Bd30-1.CHH	Bd3	31506200	31506399	199	hyper	1	1	1	1	1	0.9375	0.884615	0.333333	1	0.647059	0.875	0.2	0.615385	0.466667	0.197133	0.0640394	0.037037	0.35	0.128713	0.0457143	0.0815348
CHHDMR	7813	Bd30-1.CHH	Bd3	31540600	31540799	199	hyper	0.75	1	1	0.76	1	1	0.939394	0.5	0.823529	0.977273	0.839286	0.971831	0.907692	0.870588	0.109375	0.0196078	0.00442478	0.412903	0.0179487	0.0542373	0.0226804
CHHDMR	7841	Bd30-1.CHH	Bd3	32298700	32298899	199	hyper	0.272727	0	0	0.1	0	0.2	0	0.423423	0	0	0.378378	0.0526316	0	0.025641	0.249428	0.015873	0	0.361905	0	0	0.00571429
CHHDMR	7873	Bd30-1.CHH	Bd3	32854400	32854599	199	hypo	0.719298	0.52071	0.652174	0.980769	0.630522	0.516304	0.508929	0.620253	0.359684	0.448276	0.357143	0.480488	0.38676	0.454829	0.16129	0.252577	0.260417	0.00943396	0.224939	0.296192	0.210466
CHHDMR	7883	Bd30-1.CHH	Bd3	33033100	33033299	199	hypo	0.986842	0.961326	0.986928	1	0.982353	0.940789	0.991632	0.784946	0.797414	0.83432	1	0.905263	0.825843	0.877256	0.0652742	0.0739687	0.25	0.0246914	0.00936037	0.215359	0.334146
CHHDMR	7890	Bd30-1.CHH	Bd3	33250400	33250599	199	hypo	0.927066	0.982278	0.993769	0.976695	0.967312	0.989189	0.979888	0.691542	0.868421	0.919355	0.898223	0.841637	0.847397	0.865067	0.698113	0.466887	0.4329	0.0172414	0.316568	0.32563	0.365243
CHHDMR	7908	Bd30-1.CHH	Bd3	33737900	33738099	199	hypo	0.611111	0.5	1	0.8	0.625	0.769231	0.909091	NA	NA	NA	NA	NA	NA	NA	0.0836237	0.101266	0.212121	0.00833333	0.0701754	0.242604	0.345679
CHHDMR	7977	Bd30-1.CHH	Bd3	35367900	35368099	199	hyper	0.965517	0.973485	0.979167	0.987097	0.957143	0.980315	0.970588	0.763441	0.79918	0.89011	0.922807	0.972299	0.848101	0.918033	0.128755	0.118421	0.0144928	0.243243	0.0193548	0.265985	0.261628
CHHDMR	7990	Bd30-1.CHH	Bd3	35675700	35675899	199	hypo	1	0.98	0.777778	1	0.944444	0.909091	1	0.605263	0.551724	0.833333	0.538462	1	0.575758	0.454545	0.103715	0.116427	0.224684	0	0.197492	0.189076	0.10177
CHHDMR	8004	Bd30-1.CHH	Bd3	35851700	35851899	199	hyper	1	1	1	1	1	1	1	1	0.866667	0.875	0.933333	0.894737	0.894737	0.939394	0.0767263	0.0451128	0.00990099	0.415493	0.0344828	0.350806	0.0275862
CHHDMR	8046	Bd30-1.CHH	Bd3	36760900	36761099	199	hyper	0.990415	0.979675	0.958333	0.957143	0.978417	0.030303	0.988131	0.747692	0.949367	0.892473	0.915094	0.905579	0	0.927215	0.177533	0.130503	0.0260586	0.339695	0.146707	0.0205279	0.46884
CHHDMR	8051	Bd30-1.CHH	Bd3	36992700	36993099	399	hyper	0.8625	0.909091	1	0.64	0.952381	0.846154	1	0.02	0.16129	0.24	0.745098	0.111111	0.105263	0.190476	0.0189781	0.00387597	0	0.383686	0	0.0515021	0
CHHDMR	8052	Bd30-1.CHH	Bd3	36994800	36994999	199	hyper	0.953488	0.986301	0.948718	0.965517	0.619048	0.911765	0.96875	0.278689	0.658915	0.75	0.836066	0.909091	0.26506	0.786047	0.0323741	0.0125471	0.00755668	0.449198	0.0387597	0.0592593	0.0174507
CHHDMR	8067	Bd30-1.CHH	Bd3	37392600	37392799	199	hyper	0.478261	0.691057	0.567568	0.84	0.74359	0.682692	0.625	0.0666667	0.391892	0.386364	0.357143	0.0416667	0.2	0.230769	0.0731707	0.020979	0.0162413	0.217391	0.00900901	0.0316667	0.0603448
CHHDMR	8076	Bd30-1.CHH	Bd3	37511300	37511499	199	hyper	0.927536	0.975	1	1	0.888889	1	0.967742	0.403509	0.5	0.583333	0.428571	0	0.3125	0.411765	0.0115942	0.0142857	0.0125786	0.409639	0.0175439	0.0351562	0.0215054
CHHDMR	8095	Bd30-1.CHH	Bd3	37903300	37903499	199	hypo	0.862745	0.892473	1	0.988235	0.978261	0.903226	0.963636	0.454545	0.5	0.612903	0.735294	0.722892	0.444444	0.485714	0.205714	0.251185	0.330097	0.0434783	0.0548523	0.4	0.176
CHHDMR	8122	Bd30-1.CHH	Bd3	38339700	38339899	199	hyper	1	1	1	NA	1	1	1	1	0.866667	1	1	1	0.769231	0.666667	0.00632911	0.116279	0.0131579	0.403226	0.0350877	0.00980392	0.0247934
CHHDMR	8174	Bd30-1.CHH	Bd3	39329700	39329899	199	hyper	1	0.909091	1	0.473684	0.42	0.543478	0.253012	0.0196078	0.0714286	0.0588235	0.611111	0.326923	0.140351	0.329114	0.0106007	0	0.0075188	0.228916	0.126411	0.0559006	0.15843
CHHDMR	8176	Bd30-1.CHH	Bd3	39371900	39372099	199	hypo	0.860465	0.25641	0.965517	1	0.64	0.444444	0.745763	0.8	0.75	0.8	1	0.619048	0.68	0.529412	0.426036	0.237762	0.51634	0	0.313305	0.390625	0.279412
CHHDMR	8192	Bd30-1.CHH	Bd3	39643000	39643199	199	hyper	1	1	1	1	1	1	1	0.911111	0.535714	0.970588	0.875	0.428571	0.482759	0.878788	0.193277	0.0758621	0.00653595	0.302326	0.09375	0.127517	0.0745342
CHHDMR	8262	Bd30-1.CHH	Bd3	41320600	41320799	199	hyper	0.98	0.972222	0.857143	0.7	0.863636	0.863636	0.964912	0.315789	0.214286	0.666667	0.6	0.307692	0.285714	0.190476	0.0480769	0.0381098	0.046875	0.235294	0.0604982	0	0.0474255
CHHDMR	8332	Bd30-1.CHH	Bd3	43110000	43110199	199	hypo	0.952381	0.78125	0.954545	1	0.947368	0.92	0.861111	0.71875	0.647059	0.925926	1	0.863636	0.6	0.952381	0.0138889	0.0874317	0.286713	0	0.0125	0.0225564	0.281633
CHHDMR	8359	Bd30-1.CHH	Bd3	43959500	43959699	199	hyper	0.940959	0.950276	0.97093	0.508772	0.969925	0.989324	0.963989	0.78534	0.883721	0.813253	0.675214	0.874074	0.768844	0.850877	0.0245283	0.0410628	0.0367454	0.426829	0.0411765	0.0107991	0.0306122
CHHDMR	8366	Bd30-1.CHH	Bd3	44114800	44114999	199	hyper	0.0645161	0.0384615	0.0735294	0.818182	0.0697674	0.0740741	0.0769231	0.0526316	0.0214286	0.0485437	0.567273	0.00877193	0.076087	0.0392157	0.0138889	0.00571429	0.0118577	0.276827	0.0058309	0.0199336	0.00888889
CHHDMR	8368	Bd30-1.CHH	Bd3	44135100	44135299	199	hyper	NA	NA	NA	NA	NA	NA	NA	0.809524	1	1	1	NA	NA	1	0.0202703	0.0625	0.0175439	0.487179	NA	0	0.481481
CHHDMR	8432	Bd30-1.CHH	Bd3	45553900	45554099	199	hyper	1	1	1	0.818182	0.966667	1	0.961538	NA	NA	0	1	0.666667	0.5	0.8	0.0206897	0.0555556	0	0.286765	0.0656566	0.0529412	0.046683
CHHDMR	8476	Bd30-1.CHH	Bd3	46589900	46590099	199	hyper	0.929348	NA	0.965116	1	NA	0.982857	NA	0.484848	NA	0.697674	0.68	NA	0.616438	NA	0.0615079	NA	0.0220183	0.354167	NA	0.03	NA
CHHDMR	8487	Bd30-1.CHH	Bd3	46793100	46793299	199	hypo	0.901408	0.921569	1	0.909091	0.970588	0.962264	0.97561	0.246835	0.154412	0.5	0.32	0.444444	0.166667	0.527027	0.0163934	0.0347222	0.217822	0	0.0111732	0.0266667	0.120623
CHHDMR	8502	Bd30-1.CHH	Bd3	46947400	46947599	199	hyper	0.893939	0.895425	0.971831	1	0.859504	0.95	0.967391	0.5625	0.733333	0.836364	0.59375	0.621212	0.541667	0.724138	0.0168224	0.0249433	0.016129	0.208333	0.0257353	0.0164835	0.00409836
CHHDMR	8505	Bd30-1.CHH	Bd3	46959500	46959699	199	hypo	0.0882353	0	0.947368	0	0.875	0.153846	0	0.0434783	0	0.73913	0	0.48	0.04	0	0	0.0056391	0.300912	0.0116618	0.126866	0.0117994	0.00247525
CHHDMR	8530	Bd30-1.CHH	Bd3	47298700	47298899	199	hyper	0.963504	0.96875	1	1	1	0.957983	0.928571	0.815642	0.869565	0.851852	1	0.870968	0.826389	0.8125	0.116761	0	0.0115607	0.317073	0.180556	0.012931	0.0102041
CHHDMR	8542	Bd30-1.CHH	Bd3	47490400	47490599	199	hyper	0.941176	0.761905	1	1	1	1	0.935484	NA	0.75	1	1	0.5	0.4	0.666667	0.0143885	0.0338983	0.00970874	0.373494	0	0.075	0.119318
CHHDMR	8564	Bd30-1.CHH	Bd3	48034800	48034999	199	hyper	0.978261	0.976562	0.9	1	1	0.96875	1	0	0.333333	0.222222	0.666667	0	0.441176	0.481481	0.0628931	0.0521173	0.027027	0.361905	0.0862069	0.0518868	0.0333333
CHHDMR	8573	Bd30-1.CHH	Bd3	48321100	48321299	199	hyper	0.636364	0	0.9375	1	1	1	0.941176	0.875	NA	0.9	0.444444	1	0.722222	0.821429	0.0512821	0	0.0181818	0.311111	0.9	0.0253165	0.0102564
CHHDMR	8585	Bd30-1.CHH	Bd3	48579700	48579899	199	hypo	0.949367	0.966667	0.983607	1	0.9375	0.986667	1	0.555556	0.363636	0.714286	0.818182	0.571429	0.75	0.5	0.18942	0.152397	0.25	0.0141844	0.228	0.188917	0.313167
CHHDMR	8604	Bd30-1.CHH	Bd3	49038400	49038599	199	hyper	1	1	1	1	1	1	1	1	0.5	1	NA	NA	NA	1	0.0426357	0.178082	0	0.27193	0.0680272	0.044898	0.0772358
CHHDMR	8648	Bd30-1.CHH	Bd3	50402200	50402399	199	hyper	0.99187	0.9	0	0.8	0.981818	0.966102	0	0.847222	1	0	1	0.78125	0.652174	0.0294118	0.00616333	0	0	0.244949	0.0162791	0.00214592	0
CHHDMR	8713	Bd30-1.CHH	Bd3	52076000	52076199	199	hyper	0.930851	0.935294	0.957447	0.964286	0.935961	0.915385	0.923913	0.463415	0.44898	0.445652	0.485714	0.658537	0.442478	0.673469	0.0462963	0.0518053	0.032967	0.29376	0.121168	0.105536	0.0538358
CHHDMR	8758	Bd30-1.CHH	Bd3	53312900	53313099	199	hyper	1	0	1	1	1	NA	NA	0.636364	0.333333	0	1	0	NA	1	0	0.266667	0	0.405405	0	0.142857	0
CHHDMR	8770	Bd30-1.CHH	Bd3	53560900	53561099	199	hyper	1	1	1	0.714286	0.666667	0.967742	0.923077	0.388889	0.666667	0.777778	0.714286	0.8	0.727273	0.921569	0.027027	0.0172414	0	0.59375	0.0337079	0	0.0198675
CHHDMR	8777	Bd30-1.CHH	Bd3	53833500	53833699	199	hyper	0.873239	0.947368	0.985507	0.9375	0.976562	0.942446	0.905172	0.671875	0.663158	0.746269	0.75	0.646552	0.597122	0.602041	0.0703125	0.0128205	0.015544	0.454545	0.0413793	0.0545455	0.0506757
CHHDMR	8780	Bd30-1.CHH	Bd3	53857500	53857699	199	hypo	0.954545	0.580882	0.724138	1	0.796407	0.624204	0.696	0.80597	0.418367	0.65	0.777778	0.544828	0.557377	0.533333	0.0625	0.155425	0.516854	0.025641	0.253119	0.219895	0.230986
CHHDMR	8789	Bd30-1.CHH	Bd3	54097200	54097399	199	hyper	0.917647	0.953488	0.947368	0.95	1	1	0.956522	0.595238	0.894737	0.8	0.962963	0.8125	0.882353	0.644068	0.1139	0.125899	0.0108696	0.47619	0.241758	0.251232	0.116208
CHHDMR	8812	Bd30-1.CHH	Bd3	54647500	54647699	199	hyper	0.636364	0.125	0	0.428571	0	0	0.892857	0.487805	0	0	0.5	0.333333	0.357143	0.642857	0.157068	0.0941176	0.0222222	0.519231	0.275862	0.252525	0.215686
CHHDMR	8834	Bd30-1.CHH	Bd3	55270900	55271099	199	hyper	0	0.0165289	0.0188679	0	0	0	0.0253165	0	0	0	0.04	0.05	0.0172414	0.0243902	0.0144928	0.0111111	0.031746	0.214286	0.0172414	0	0.341463
CHHDMR	8838	Bd30-1.CHH	Bd3	55450500	55450699	199	hyper	0.8	0.75	0.8	0.960526	1	0.565217	1	0.514286	0.222222	0.333333	0.5	0.615385	0.333333	0.222222	0.119231	0.195652	0	0.320113	0.392405	0.301887	0.177778
CHHDMR	8858	Bd30-1.CHH	Bd3	56002500	56002699	199	hypo	1	NA	1	0	1	0.833333	1	0	0.6	0.571429	0.5	0.857143	0.615385	0.888889	0	0.228261	0.361446	0	0.337662	0.217391	0.204082
CHHDMR	8860	Bd30-1.CHH	Bd3	56039000	56039199	199	hyper	0.00546448	0.0236967	0.0126582	0.0191083	0.0103448	0.010582	0.0207612	0	0.037037	0	0	0.0333333	0	0	0.0377358	0.0241935	0.0135135	0.546667	0	0.111111	0
CHHDMR	8896	Bd30-1.CHH	Bd3	57129200	57129399	199	hyper	0.0555556	0.0909091	0.391304	0.782609	0.611111	0	0.657143	0.047619	0.0666667	0.265306	0.34375	0.163265	0.0487805	0.32381	0.025641	0	0.00540541	0.326733	0.0686695	0.0465116	0.0402685
CHHDMR	8899	Bd30-1.CHH	Bd3	57236900	57237099	199	hypo	0.926471	1	1	0.984615	0.976471	0.615385	0.975806	0.69	0.78125	0.963303	0.943723	0.924638	0.833333	0.891949	0.03207	0.0117647	0.206349	0.0136986	0.0385714	0.010989	0.0392157
CHHDMR	8909	Bd30-1.CHH	Bd3	57399700	57399899	199	hypo	0.928571	0.981132	0.970588	0.962963	1	0.989418	0.98615	0.837838	0.701299	0.756757	0.931034	0.916667	0.826923	0.756757	0.252632	0.421594	0.611111	0	0	0.658784	0.367232
CHHDMR	8929	Bd30-1.CHH	Bd3	57925200	57925599	399	hypo	0.981723	0.953271	0.972376	0.962264	0.961988	0.914141	0.95283	0.759563	0.68	0.810945	0.883117	0.756757	0.834483	0.843416	0.0913043	0.271111	0.32726	0.0205371	0.316578	0.378953	0.361267
CHHDMR	8940	Bd30-1.CHH	Bd3	58004500	58004699	199	hyper	0.8	0.984375	1	1	1	0.944444	0.981481	0.880734	0.905263	0.96875	0.833333	0.944444	0.923077	0.880435	0.0165017	0.00189753	0.010929	0.227273	0.0177936	0.004158	0.0077821
CHHDMR	8964	Bd30-1.CHH	Bd3	58780900	58781099	199	hyper	0.870968	0.990099	0.933333	1	0.969697	0.979592	0.8125	0.590909	0.793103	0.428571	0.857143	0.9	0.85	0.52381	0.168421	0.0997375	0.0290698	0.24026	0.0879121	0.218447	0.0421687
CHHDMR	8976	Bd30-1.CHH	Bd3	59365800	59365999	199	hypo	0.901099	0.723684	1	0.722222	0.957143	0.62069	0.942857	0.115385	0.261905	0.62963	0.05	0.621951	0.175	0.457447	0.0243161	0.00980392	0.375	0	0.232026	0.00621118	0.206767
CHHDMR	8977	Bd30-1.CHH	Bd3	59386900	59387099	199	hypo	0.878481	0.588608	0.782051	0.944297	0.827751	0.708241	0.768531	0.594488	0.495495	0.540541	0.856436	0.585271	0.425134	0.56761	0.410256	0.163743	0.576577	0	0.655172	0.184874	0.811947
CHHDMR	9057	Bd30-1.CHH	Bd4	1951300	1951499	199	hypo	0.890476	0.554348	0.978723	0.835165	0.953125	0.626667	0.850829	0.259615	0.136364	0.645161	0.352941	0.833333	0.676471	0.63964	0.0460829	0.0694444	0.221154	0.025641	0.108696	0.148936	0.0813187
CHHDMR	9117	Bd30-1.CHH	Bd4	3920700	3920899	199	hypo	0	0.0833333	0.0634921	0	0.0598291	0.128205	0.12987	NA	0.146667	0.275862	0	0.137255	0.146341	0.216216	0	0.159091	0.236364	0.0126582	0.228374	0.121951	0.116071
CHHDMR	9127	Bd30-1.CHH	Bd4	4263900	4264099	199	hypo	0.941748	0.879747	0.95082	0.792079	0.909091	0.925926	0.9375	0.296296	0.298507	0.576923	0.444444	0.423077	0.321429	0.478261	0.175202	0.247573	0.309091	0.0313253	0.109023	0.266515	0.259804
CHHDMR	9133	Bd30-1.CHH	Bd4	4334800	4334999	199	hyper	NA	1	0.978539	0.404959	1	0	NA	NA	0.5	0.634467	0.091954	0.5	0	NA	NA	0	0.0247172	0.619048	0	0	NA
CHHDMR	9172	Bd30-1.CHH	Bd4	5011600	5011799	199	hypo	0.918033	0.953488	0.866667	0.981818	0.918919	0.846154	0.955556	0.6	0.875	0.619048	0.875	0.923077	0.692308	0.928571	0.214286	0.0355556	0.376712	0	0.0334928	0.288288	0.121523
CHHDMR	9196	Bd30-1.CHH	Bd4	5655000	5655199	199	hyper	0.304348	0.396226	0.598214	0.35	0.415584	0.298077	0.391304	0.220339	0.0454545	0.285714	0.1	0.173913	0.08	0.193878	0.176796	0.0774648	0.0285714	0.545455	0.0864198	0.0627615	0.0612745
CHHDMR	9208	Bd30-1.CHH	Bd4	5979200	5979399	199	hyper	0	0.76	0.875	0.8	0.818182	0.863636	0.954545	0.35	0.478261	0.428571	0.736842	0.3125	0.375	0.52381	0.174194	0.12212	0.0235294	0.360825	0.0816327	0.0597826	0.110016
CHHDMR	9242	Bd30-1.CHH	Bd4	6736600	6736799	199	hyper	1	0.952381	1	1	1	1	1	0.733333	1	0.75	NA	NA	0.666667	1	0.00858369	0.119266	0.0149254	0.274194	0	0.010989	0.126582
CHHDMR	9250	Bd30-1.CHH	Bd4	6806400	6806599	199	hyper	0	0.00787402	0	0.61674	0	0	0.831502	0	0	0	0.267241	0	0	0.21519	0.00653595	0.00646552	0.00268097	0.21474	0.00733945	0.00928793	0.107143
CHHDMR	9272	Bd30-1.CHH	Bd4	7369900	7370099	199	hyper	0.363636	0.875	0.916667	1	0	1	1	0.0430108	0	0	0.777778	0	0	0	0.0288462	0.003861	0.00628931	0.231325	0.0121457	0	0
CHHDMR	9301	Bd30-1.CHH	Bd4	8143100	8143299	199	hyper	0.916667	1	1	0.75	0.833333	NA	1	0.2	0	1	0.5	0.666667	NA	1	0.0169492	0	0	0.21374	0	0	0
CHHDMR	9310	Bd30-1.CHH	Bd4	8302000	8302199	199	hypo	NA	0.952381	1	1	1	NA	1	0.6	0.921053	0.916667	1	0.909091	1	0.971429	0	0.188235	0.438053	0	0.214953	0	0.189003
CHHDMR	9353	Bd30-1.CHH	Bd4	9915700	9915899	199	hyper	0.956522	0	0	0.945736	0	0	0.71875	0.850993	0	0.038961	0.852174	0	0.0294118	0.0677083	0.0399674	0.0039604	0	0.237319	0	0.00598802	0.0123916
CHHDMR	9402	Bd30-1.CHH	Bd4	10904700	10904899	199	hypo	1	0.826087	1	1	NA	0.777778	1	0.857143	0.6	1	NA	NA	0.833333	0.75	0.0220994	0.380952	0.272727	0	NA	0.166667	0.147059
CHHDMR	9481	Bd30-1.CHH	Bd4	12978200	12978399	199	hypo	0.666667	1	1	1	0	1	0.714286	0	0	0	0	0	0	0	0.0961538	0.104348	0.301887	0	0	0.142857	0.00869565
CHHDMR	9514	Bd30-1.CHH	Bd4	13817700	13817899	199	hyper	1	1	1	1	0.8125	1	0.941176	0.521739	0.4625	0.614035	0.666667	0.619835	0.438596	0.64557	0.134615	0.0708333	0.00886918	0.283784	0.0137931	0.0479303	0.0473186
CHHDMR	9526	Bd30-1.CHH	Bd4	13997100	13997299	199	hypo	0.971429	0.891566	1	1	0.86	0.918033	0.986667	0.613757	0.445596	0.47541	0.6	0.398374	0.592105	0.48	0.189504	0.266272	0.329949	0	0.217742	0.336777	0.25
CHHDMR	9574	Bd30-1.CHH	Bd4	14966600	14966799	199	hyper	0.984733	0.690476	0.904762	0.873563	0.934211	0.987805	0.820312	0.0168067	0.515152	0.047619	0.82	0.21875	0.111111	0.0531915	0.00728597	0.527094	0	0.58	0.0250784	0.0155763	0.00875274
CHHDMR	9591	Bd30-1.CHH	Bd4	15274300	15274499	199	hyper	0.047619	0	0	0.924528	0	0.763314	0.797101	0	0.0192308	0.0135135	0.833333	0	0.564417	0.577236	0	0	0.0143541	0.364486	0.0322581	0.168016	0.0571429
CHHDMR	9624	Bd30-1.CHH	Bd4	15690300	15690499	199	hyper	0.928571	0.590909	0.9	1	NA	NA	NA	0	0.0806452	0.2	0.133333	NA	NA	NA	0.0046729	0.00943396	0	0.258065	NA	0.5	NA
CHHDMR	9701	Bd30-1.CHH	Bd4	17385900	17386099	199	hyper	NA	0.984496	1	0.837607	0.980519	0.926829	0.972477	NA	0.90625	0.956522	0.52	0.866667	0.903226	0.833333	NA	0.0349493	0.026253	0.378378	0.04	0.00984252	0.00533618
CHHDMR	9711	Bd30-1.CHH	Bd4	17649100	17649399	299	hypo	0.950355	0.927007	0.958904	0.916667	0.937173	0.915033	0.873418	0.554455	0.568966	0.633333	0.678571	0.78481	0.555556	0.644444	0.0655738	0.118126	0.436482	0.00515464	0.321377	0.282004	0.271941
CHHDMR	9738	Bd30-1.CHH	Bd4	18227900	18228099	199	hyper	0.714286	1	1	1	1	1	1	0.285714	0.454545	0.4	0.454545	0.357143	0.777778	0.25	0.0390625	0.0608108	0.0142857	0.258065	0.0793651	0.25	0.0481928
CHHDMR	9772	Bd30-1.CHH	Bd4	18902100	18902299	199	hyper	1	0.706422	1	1	0.833333	0.859649	0.970149	0.588235	0.874459	0.954545	0.943396	0.959184	0.79661	0.879121	0	0.0883392	0	0.352113	0.0621762	0.032	0.0384615
CHHDMR	9778	Bd30-1.CHH	Bd4	19056400	19056599	199	hyper	1	0.954545	1	NA	1	1	1	0.885714	0.977778	1	1	0.90625	0.794118	0.933333	0.00409836	0.21097	0	0.284553	0.0205128	0.0382166	0.04
CHHDMR	9779	Bd30-1.CHH	Bd4	19056700	19056899	199	hyper	0.975	0.821918	0.894737	0.69697	0.935484	0.914286	0.888889	0.9	0.8	0.666667	0.764706	0.818182	0.736842	0.588235	0.117647	0.28626	0	0.297521	0.0416667	0.0438596	0.0755814
[truncated: 1,964 more rows]
