# Supplementary material for: DNA methylation profiles of diverse Brachypodium distachyon align with underlying genetic diversity
Source: Genome Res. 2016 Nov;26(11):1520–31. doi: 10.1101/gr.205468.116 (PMC5088594; doi:10.1101/gr.205468.116)
Supplement: Supplemental Material [file supp_gr.205468.116_Supplemental_Table_4.xlsx]

## Sheet: Sheet1
Supplemental Table 4: Bisulfite sequencing summary statistics for biological replicate data
Genotype	Raw reads*a	QC reads	unique mapped	Mapping Efficency (%)	CG methylation (%)	CHG methylation (%)	CHH methylation (%)	Average Coverage (x)*b	Bisulfite Conversion rate (%)*c	NCBI SRA Run
Bd1-1r1	43497951	42961148	25673698	59.8	62.3	35.9	1.7	9.47369	99.29	SRR2475390
Bd1-1r2	50570651	50307631	30025008	59.7	67.1	40.3	1.9	11.0793	99.34	SRR2475391
Bd1-1r3	62833390	61511442	37709825	61.3	61.9	36.2	1.8	13.9151	99.34	SRR2475392
Bd1-1r4	45199271	44736200	27070760	60.5	62.6	36	1.7	9.98921	99.33	SRR2475393
Bd1-1r5	44095406	43940471	27737527	63.1	58.4	32.9	1.6	10.2352	99.43	SRR2475394
Bd21r1	31597069	31495174	23796523	75.6	59.6	32.7	1.7	8.781	99.35	SRR2475395
Bd21r2	37179216	37024091	27347430	73.9	64.7	36.6	1.8	10.0913	99.38	SRR2475396
Bd21r3	41423430	41144067	30368280	73.8	65.1	38.8	2	11.206	99.32	SRR2475397
Bd21r4	52460230	52307703	39799262	76.1	61	34.7	1.7	14.6861	99.4	SRR2475398
Bd21r5	43915311	43781757	32461333	74.1	65.1	37.8	1.9	11.9784	99.37	SRR2475399
Bd3-1r2	43304471	43075208	28651607	66.5	65.4	39.9	1.8	10.5725	99.37	SRR2475400
Bd3-1r3	36475571	36340013	24960250	68.7	66.2	40.9	1.8	9.21042	99.42	SRR2475401
Bd3-1r4	40726747	40607751	28549141	70.3	60.2	35.6	1.6	10.5347	99.42	SRR2475402
Bd3-1r5	40986418	40881649	28239137	69.1	65.5	39.7	1.8	10.4203	99.45	SRR2475403
a	count of all individual reads, not taking into account paired-end status
b	Based on 271.1Mb size of combined chromosome sequence
c	Assessed via Bd21 chloroplast sequence
