# Supplementary material for: DNA methylation profiles of diverse Brachypodium distachyon align with underlying genetic diversity
Source: Genome Res. 2016 Nov;26(11):1520–31. doi: 10.1101/gr.205468.116 (PMC5088594; doi:10.1101/gr.205468.116)
Supplement: Supplemental Material [file supp_gr.205468.116_Supplemental_Table_5.xlsx]

## Sheet: Sheet1
Supplemental Table 5: List of Smooth DSS DMRs
chrom	start	stop	size	number_c	geno1_methylation	geno2_methylation	methylation_difference (g1-g2)	DSSstat	contrast	context
Bd1	61281798	61286156	4359	820	0.80098	0.0777426	0.723237	71311.8	Bd1-1vsBd3-1	CG
Bd1	41679172	41681990	2819	624	0.916324	0.0779192	0.838405	61994.9	Bd1-1vsBd3-1	CG
Bd1	47279804	47289458	9655	803	0.935205	0.0884047	0.8468	44503.8	Bd1-1vsBd3-1	CG
Bd1	50012899	50015020	2122	452	0.184718	0.938847	-0.754129	-43983.8	Bd1-1vsBd3-1	CG
Bd1	23511714	23514557	2844	536	0.0697397	0.793145	-0.723405	-42411.4	Bd1-1vsBd3-1	CG
Bd1	49386932	49389150	2219	377	0.0901926	0.902129	-0.811936	-40997.5	Bd1-1vsBd3-1	CG
Bd1	42633372	42637132	3761	372	0.0770498	0.946746	-0.869696	-38216.9	Bd1-1vsBd3-1	CG
Bd1	1534075	1536005	1931	350	0.0501922	0.788682	-0.73849	-37002.3	Bd1-1vsBd3-1	CG
Bd1	58190774	58193277	2504	371	0.0812572	0.905656	-0.824399	-36383.7	Bd1-1vsBd3-1	CG
Bd1	2307194	2308511	1318	234	0.0423643	0.952108	-0.909743	-34707.2	Bd1-1vsBd3-1	CG
Bd1	16909443	16911389	1947	374	0.180732	0.948307	-0.767575	-34190.8	Bd1-1vsBd3-1	CG
Bd1	20400377	20401656	1280	276	0.0467598	0.862364	-0.815604	-31377.3	Bd1-1vsBd3-1	CG
Bd1	20392465	20394475	2011	278	0.939492	0.0530554	0.886437	30331.4	Bd1-1vsBd3-1	CG
Bd1	59956782	59958658	1877	299	0.120384	0.959904	-0.83952	-29440.6	Bd1-1vsBd3-1	CG
Bd1	73696415	73700340	3926	343	0.960588	0.106019	0.854569	29293.5	Bd1-1vsBd3-1	CG
Bd1	27432442	27434070	1629	330	0.136644	0.913043	-0.776399	-28390.6	Bd1-1vsBd3-1	CG
Bd1	741324	743290	1967	261	0.0787424	0.960763	-0.88202	-28203.7	Bd1-1vsBd3-1	CG
Bd1	51274839	51276147	1309	243	0.116297	0.964226	-0.847929	-27930.2	Bd1-1vsBd3-1	CG
Bd1	10897239	10898454	1216	272	0.0687343	0.940348	-0.871614	-27781.1	Bd1-1vsBd3-1	CG
Bd1	71330470	71333080	2611	490	0.457641	0.962725	-0.505084	-27721.1	Bd1-1vsBd3-1	CG
Bd1	45275764	45277320	1557	256	0.0367541	0.88613	-0.849376	-27630.2	Bd1-1vsBd3-1	CG
Bd1	53376024	53378292	2269	295	0.939236	0.103226	0.83601	27266.9	Bd1-1vsBd3-1	CG
Bd1	14050010	14052777	2768	354	0.129057	0.915439	-0.786381	-26281.8	Bd1-1vsBd3-1	CG
Bd1	48230839	48232653	1815	299	0.946323	0.118855	0.827469	25932.9	Bd1-1vsBd3-1	CG
Bd1	38737187	38738255	1069	248	0.951072	0.0575935	0.893479	25765.1	Bd1-1vsBd3-1	CG
Bd1	48812150	48814026	1877	321	0.96548	0.171362	0.794118	25524.2	Bd1-1vsBd3-1	CG
Bd1	66304102	66305274	1173	180	0.0512243	0.953224	-0.902	-25442.1	Bd1-1vsBd3-1	CG
Bd1	70195420	70198172	2753	282	0.93612	0.0809742	0.855146	24541.1	Bd1-1vsBd3-1	CG
Bd1	47267969	47269082	1114	202	0.950882	0.0855614	0.86532	24524.9	Bd1-1vsBd3-1	CG
Bd1	35839914	35841427	1514	222	0.952626	0.0927398	0.859886	24365	Bd1-1vsBd3-1	CG
Bd1	32210507	32212549	2043	414	0.906491	0.251736	0.654755	24161.1	Bd1-1vsBd3-1	CG
Bd1	60672648	60673705	1058	230	0.933983	0.0751467	0.858837	24154.6	Bd1-1vsBd3-1	CG
Bd1	37546100	37548041	1942	256	0.102426	0.940907	-0.838481	-24013.7	Bd1-1vsBd3-1	CG
Bd1	50191243	50193180	1938	341	0.0863949	0.855018	-0.768623	-23945.8	Bd1-1vsBd3-1	CG
Bd1	68876490	68877863	1374	227	0.952756	0.11758	0.835176	23837.5	Bd1-1vsBd3-1	CG
Bd1	4707793	4710057	2265	382	0.964472	0.254965	0.709507	23366.3	Bd1-1vsBd3-1	CG
Bd1	7314537	7315825	1289	182	0.0356304	0.941632	-0.906002	-23101.5	Bd1-1vsBd3-1	CG
Bd1	43066772	43072184	5413	331	0.0809411	0.938662	-0.857721	-23050	Bd1-1vsBd3-1	CG
Bd1	57494845	57496704	1860	324	0.865261	0.142271	0.72299	22908.1	Bd1-1vsBd3-1	CG
Bd1	71346018	71349085	3068	292	0.0874106	0.916644	-0.829233	-22636.1	Bd1-1vsBd3-1	CG
Bd1	48299194	48301906	2713	234	0.955702	0.0918511	0.863851	22556.7	Bd1-1vsBd3-1	CG
Bd1	42199375	42200684	1310	206	0.918756	0.0853256	0.83343	22542.6	Bd1-1vsBd3-1	CG
Bd1	17776230	17777545	1316	261	0.933753	0.17722	0.756533	22401.7	Bd1-1vsBd3-1	CG
Bd1	74665506	74667447	1942	300	0.237368	0.947354	-0.709986	-22334	Bd1-1vsBd3-1	CG
Bd1	3587684	3589208	1525	259	0.213679	0.953958	-0.740279	-22333.8	Bd1-1vsBd3-1	CG
Bd1	62595695	62599151	3457	285	0.0586684	0.92407	-0.865402	-22101	Bd1-1vsBd3-1	CG
Bd1	28852961	28854261	1301	212	0.939467	0.088297	0.85117	21915.4	Bd1-1vsBd3-1	CG
Bd1	62939161	62940796	1636	220	0.158272	0.939888	-0.781616	-21897.8	Bd1-1vsBd3-1	CG
Bd1	14093130	14096049	2920	331	0.89141	0.0594341	0.831976	21732.5	Bd1-1vsBd3-1	CG
Bd1	43449184	43450557	1374	210	0.964199	0.117881	0.846318	21716.9	Bd1-1vsBd3-1	CG
Bd1	13889706	13890785	1080	180	0.0390122	0.919517	-0.880505	-21690.7	Bd1-1vsBd3-1	CG
Bd1	69167169	69171121	3953	316	0.081645	0.946161	-0.864516	-21670	Bd1-1vsBd3-1	CG
Bd1	34013132	34015756	2625	361	0.787776	0.16122	0.626556	21578.6	Bd1-1vsBd3-1	CG
Bd1	4125672	4127863	2192	314	0.785895	0.0833871	0.702507	21339.3	Bd1-1vsBd3-1	CG
Bd1	52020437	52021869	1433	260	0.94689	0.159519	0.787371	21320	Bd1-1vsBd3-1	CG
Bd1	12185114	12187304	2191	244	0.950734	0.104267	0.846467	21295.9	Bd1-1vsBd3-1	CG
Bd1	55827924	55829084	1161	258	0.930065	0.0916606	0.838405	21255.7	Bd1-1vsBd3-1	CG
Bd1	64612376	64613675	1300	207	0.0844867	0.948072	-0.863585	-21146.6	Bd1-1vsBd3-1	CG
Bd1	45340942	45342443	1502	250	0.119533	0.914075	-0.794542	-21016.3	Bd1-1vsBd3-1	CG
Bd1	5789181	5790343	1163	223	0.94584	0.18724	0.7586	21015.1	Bd1-1vsBd3-1	CG
Bd1	60194867	60196169	1303	201	0.0624239	0.938042	-0.875618	-20818.4	Bd1-1vsBd3-1	CG
Bd1	34836983	34838850	1868	267	0.954197	0.194809	0.759388	20787.9	Bd1-1vsBd3-1	CG
Bd1	48517225	48518601	1377	220	0.128823	0.934633	-0.80581	-20638.4	Bd1-1vsBd3-1	CG
Bd1	64344757	64345823	1067	201	0.858169	0.0456801	0.812489	20598.1	Bd1-1vsBd3-1	CG
Bd1	40624828	40625868	1041	144	0.0416783	0.933069	-0.89139	-20408.6	Bd1-1vsBd3-1	CG
Bd1	33261092	33262348	1257	200	0.93337	0.0795808	0.85379	20358.4	Bd1-1vsBd3-1	CG
Bd1	14627557	14629012	1456	200	0.947875	0.0553748	0.8925	20211.8	Bd1-1vsBd3-1	CG
Bd1	3224830	3225847	1018	206	0.936173	0.133276	0.802897	20105.5	Bd1-1vsBd3-1	CG
Bd1	30271315	30272564	1250	204	0.0953261	0.952137	-0.856811	-20096.8	Bd1-1vsBd3-1	CG
Bd1	63394689	63395788	1100	230	0.906812	0.0896673	0.817145	20087.8	Bd1-1vsBd3-1	CG
Bd1	17088394	17089505	1112	162	0.0388664	0.916032	-0.877166	-20055.3	Bd1-1vsBd3-1	CG
Bd1	53845226	53846680	1455	210	0.936447	0.126667	0.80978	19884.8	Bd1-1vsBd3-1	CG
Bd1	7510297	7511623	1327	183	0.07185	0.966836	-0.894986	-19868.5	Bd1-1vsBd3-1	CG
Bd1	8182073	8183144	1072	210	0.0672771	0.942305	-0.875028	-19823.2	Bd1-1vsBd3-1	CG
Bd1	33211587	33213306	1720	260	0.959222	0.174644	0.784578	19775.6	Bd1-1vsBd3-1	CG
Bd1	64619851	64621695	1845	206	0.042228	0.896719	-0.854491	-19536	Bd1-1vsBd3-1	CG
Bd1	69143424	69144717	1294	231	0.118656	0.930652	-0.811997	-19509.4	Bd1-1vsBd3-1	CG
Bd1	5210111	5212005	1895	242	0.940939	0.0817699	0.859169	19508.7	Bd1-1vsBd3-1	CG
Bd1	34023227	34025219	1993	198	0.956313	0.127635	0.828678	19359.7	Bd1-1vsBd3-1	CG
Bd1	26920145	26921483	1339	205	0.0514468	0.847615	-0.796168	-19005.9	Bd1-1vsBd3-1	CG
Bd1	48192908	48194696	1789	296	0.90366	0.112857	0.790803	19004.3	Bd1-1vsBd3-1	CG
Bd1	16844462	16846218	1757	242	0.956542	0.227823	0.728718	18953.1	Bd1-1vsBd3-1	CG
Bd1	54250931	54253258	2328	200	0.100698	0.9474	-0.846702	-18889.4	Bd1-1vsBd3-1	CG
Bd1	30471520	30473322	1803	238	0.959288	0.179987	0.779301	18858.1	Bd1-1vsBd3-1	CG
Bd1	26111778	26113051	1274	254	0.0325144	0.700641	-0.668127	-18677.6	Bd1-1vsBd3-1	CG
Bd1	42982272	42983904	1633	258	0.941364	0.144721	0.796643	18665.1	Bd1-1vsBd3-1	CG
Bd1	48118822	48120176	1355	228	0.963252	0.279611	0.68364	18445.3	Bd1-1vsBd3-1	CG
Bd1	4041257	4042376	1120	210	0.262886	0.956885	-0.693999	-18419.9	Bd1-1vsBd3-1	CG
Bd1	13075841	13077264	1424	219	0.0958663	0.869472	-0.773606	-18404.6	Bd1-1vsBd3-1	CG
Bd1	7500254	7501252	999	208	0.154213	0.868936	-0.714723	-18282.8	Bd1-1vsBd3-1	CG
Bd1	17290599	17292627	2029	252	0.877072	0.16565	0.711421	18193	Bd1-1vsBd3-1	CG
Bd1	37658455	37660090	1636	210	0.0447842	0.841433	-0.796649	-18139.2	Bd1-1vsBd3-1	CG
Bd1	30401149	30403627	2479	316	0.906921	0.150238	0.756684	18131.4	Bd1-1vsBd3-1	CG
Bd1	57815668	57819506	3839	416	0.769989	0.0859865	0.684003	18064.9	Bd1-1vsBd3-1	CG
Bd1	17889151	17890155	1005	170	0.951396	0.0769486	0.874447	18007.7	Bd1-1vsBd3-1	CG
Bd1	49037314	49038517	1204	203	0.0369579	0.888368	-0.85141	-17941.2	Bd1-1vsBd3-1	CG
Bd1	57699945	57702463	2519	244	0.0412846	0.889937	-0.848652	-17678.3	Bd1-1vsBd3-1	CG
Bd1	70419685	70421234	1550	203	0.0674691	0.938549	-0.87108	-17645.5	Bd1-1vsBd3-1	CG
Bd1	24242468	24244292	1825	314	0.850484	0.128097	0.722387	17606.3	Bd1-1vsBd3-1	CG
Bd1	56978840	56980281	1442	250	0.0499394	0.832214	-0.782275	-17579.6	Bd1-1vsBd3-1	CG
Bd1	23806505	23807520	1016	156	0.95516	0.100214	0.854946	17437.8	Bd1-1vsBd3-1	CG
Bd1	25844346	25845353	1008	159	0.0423954	0.923166	-0.88077	-17385.2	Bd1-1vsBd3-1	CG
Bd1	59361666	59362783	1118	296	0.177207	0.91386	-0.736654	-17355.8	Bd1-1vsBd3-1	CG
Bd1	7328125	7329123	999	213	0.898484	0.081782	0.816702	17343.7	Bd1-1vsBd3-1	CG
Bd1	52650670	52651962	1293	182	0.91475	0.0857909	0.828959	17326	Bd1-1vsBd3-1	CG
Bd1	2432176	2433202	1027	190	0.0657963	0.936207	-0.87041	-17169.5	Bd1-1vsBd3-1	CG
Bd1	9667594	9669549	1956	272	0.891962	0.0790359	0.812926	17151.1	Bd1-1vsBd3-1	CG
Bd1	50015663	50016704	1042	175	0.934503	0.059199	0.875304	17143.1	Bd1-1vsBd3-1	CG
Bd1	21907251	21908688	1438	171	0.937965	0.0803184	0.857647	17107.3	Bd1-1vsBd3-1	CG
Bd1	40197735	40198950	1216	191	0.0755878	0.91671	-0.841122	-17036.9	Bd1-1vsBd3-1	CG
Bd1	30106807	30107503	697	169	0.958107	0.0710598	0.887047	16982.8	Bd1-1vsBd3-1	CG
Bd1	68338460	68339596	1137	156	0.102243	0.952512	-0.850269	-16979.1	Bd1-1vsBd3-1	CG
Bd1	26455897	26457255	1359	150	0.0542406	0.950276	-0.896035	-16853	Bd1-1vsBd3-1	CG
Bd1	59275084	59276255	1172	188	0.0693331	0.895366	-0.826032	-16783.2	Bd1-1vsBd3-1	CG
Bd1	40926778	40928053	1276	232	0.130479	0.931002	-0.800524	-16751.8	Bd1-1vsBd3-1	CG
Bd1	9945692	9947261	1570	250	0.0347548	0.880328	-0.845573	-16701.6	Bd1-1vsBd3-1	CG
Bd1	41152527	41153620	1094	171	0.166262	0.946365	-0.780103	-16699.2	Bd1-1vsBd3-1	CG
Bd1	43830462	43831518	1057	156	0.947786	0.0869706	0.860815	16673.3	Bd1-1vsBd3-1	CG
Bd1	50174483	50175726	1244	158	0.0380106	0.923322	-0.885312	-16666.2	Bd1-1vsBd3-1	CG
Bd1	11781898	11783172	1275	208	0.110025	0.955134	-0.845108	-16524.7	Bd1-1vsBd3-1	CG
Bd1	26321123	26322288	1166	170	0.855851	0.070072	0.785779	16462.6	Bd1-1vsBd3-1	CG
Bd1	19577674	19579006	1333	184	0.953921	0.215246	0.738675	16293.5	Bd1-1vsBd3-1	CG
Bd1	25482182	25483325	1144	182	0.250674	0.952728	-0.702055	-15996.6	Bd1-1vsBd3-1	CG
Bd1	41460243	41461648	1406	218	0.156145	0.888101	-0.731957	-15884.4	Bd1-1vsBd3-1	CG
Bd1	34644114	34645125	1012	162	0.961649	0.141832	0.819817	15867.7	Bd1-1vsBd3-1	CG
Bd1	59667601	59677636	10036	443	0.864317	0.106915	0.757403	15774.3	Bd1-1vsBd3-1	CG
Bd1	33477730	33479752	2023	242	0.257998	0.94124	-0.683241	-15764.5	Bd1-1vsBd3-1	CG
Bd1	25710033	25710988	956	144	0.92523	0.0385311	0.886699	15763.2	Bd1-1vsBd3-1	CG
Bd1	23529848	23530694	847	225	0.0804745	0.902761	-0.822286	-15756	Bd1-1vsBd3-1	CG
Bd1	70596410	70597962	1553	191	0.113571	0.81711	-0.703539	-15741.6	Bd1-1vsBd3-1	CG
Bd1	62530645	62532058	1414	205	0.108743	0.858725	-0.749982	-15701.9	Bd1-1vsBd3-1	CG
Bd1	69699686	69701153	1468	190	0.812774	0.0465704	0.766203	15627.7	Bd1-1vsBd3-1	CG
Bd1	61791664	61793349	1686	180	0.0648894	0.939955	-0.875066	-15568.2	Bd1-1vsBd3-1	CG
Bd1	23273719	23274735	1017	182	0.138882	0.937664	-0.798782	-15561.5	Bd1-1vsBd3-1	CG
Bd1	57007364	57008871	1508	254	0.0452942	0.788208	-0.742914	-15520.6	Bd1-1vsBd3-1	CG
Bd1	66762009	66768033	6025	328	0.804669	0.201477	0.603193	15465.3	Bd1-1vsBd3-1	CG
Bd1	34557456	34558588	1133	233	0.0947554	0.858112	-0.763357	-15410.2	Bd1-1vsBd3-1	CG
Bd1	16691255	16692442	1188	212	0.0421428	0.801807	-0.759664	-15391.3	Bd1-1vsBd3-1	CG
Bd1	57943001	57945851	2851	272	0.247174	0.716989	-0.469815	-15351.6	Bd1-1vsBd3-1	CG
Bd1	45336650	45337819	1170	211	0.118609	0.932367	-0.813758	-15334.1	Bd1-1vsBd3-1	CG
Bd1	22353272	22355637	2366	246	0.074701	0.917965	-0.843264	-15313.2	Bd1-1vsBd3-1	CG
Bd1	53414103	53416872	2770	217	0.905486	0.0799831	0.825503	15135.7	Bd1-1vsBd3-1	CG
Bd1	54809472	54811015	1544	200	0.951803	0.0783867	0.873416	15129.2	Bd1-1vsBd3-1	CG
Bd1	50130777	50131824	1048	142	0.0462707	0.941027	-0.894756	-15016.6	Bd1-1vsBd3-1	CG
Bd1	55454784	55458424	3641	350	0.842025	0.126901	0.715125	15003.5	Bd1-1vsBd3-1	CG
Bd1	65656985	65658134	1150	157	0.116136	0.938697	-0.822561	-14963.2	Bd1-1vsBd3-1	CG
Bd1	11000721	11001811	1091	138	0.907764	0.0450088	0.862755	14797	Bd1-1vsBd3-1	CG
Bd1	25657930	25660085	2156	344	0.103786	0.656619	-0.552833	-14779.2	Bd1-1vsBd3-1	CG
Bd1	46781563	46782478	916	277	0.275988	0.915015	-0.639028	-14756.9	Bd1-1vsBd3-1	CG
Bd1	58517048	58518302	1255	180	0.0419082	0.879592	-0.837684	-14743.1	Bd1-1vsBd3-1	CG
Bd1	68643964	68645717	1754	228	0.185388	0.90544	-0.720052	-14719.8	Bd1-1vsBd3-1	CG
Bd1	10970120	10971099	980	136	0.0433269	0.942489	-0.899162	-14615.3	Bd1-1vsBd3-1	CG
Bd1	41798186	41801571	3386	302	0.915147	0.122504	0.792642	14598.9	Bd1-1vsBd3-1	CG
Bd1	22403875	22407072	3198	274	0.936091	0.156439	0.779651	14587.6	Bd1-1vsBd3-1	CG
Bd1	61998304	61999691	1388	148	0.961484	0.0553032	0.906181	14440.4	Bd1-1vsBd3-1	CG
Bd1	58655645	58657449	1805	190	0.955681	0.108424	0.847257	14413.3	Bd1-1vsBd3-1	CG
Bd1	34542417	34543452	1036	174	0.163913	0.909403	-0.74549	-14350.6	Bd1-1vsBd3-1	CG
Bd1	34364754	34366379	1626	206	0.296232	0.956918	-0.660685	-14303.1	Bd1-1vsBd3-1	CG
Bd1	60974698	60975878	1181	175	0.0507224	0.89978	-0.849058	-14240.7	Bd1-1vsBd3-1	CG
Bd1	15621785	15623502	1718	316	0.82851	0.281184	0.547326	14217.7	Bd1-1vsBd3-1	CG
Bd1	40935313	40936674	1362	234	0.914247	0.197657	0.716591	14158.1	Bd1-1vsBd3-1	CG
Bd1	67743235	67744267	1033	210	0.106211	0.842795	-0.736584	-14149.3	Bd1-1vsBd3-1	CG
Bd1	37653632	37654596	965	157	0.0367317	0.840994	-0.804262	-14125.6	Bd1-1vsBd3-1	CG
Bd1	61375741	61377185	1445	237	0.238107	0.94454	-0.706433	-14082.3	Bd1-1vsBd3-1	CG
Bd1	30476235	30477476	1242	166	0.195569	0.94113	-0.745562	-14063.7	Bd1-1vsBd3-1	CG
Bd1	55149046	55150181	1136	194	0.045286	0.809125	-0.763839	-14029.6	Bd1-1vsBd3-1	CG
Bd1	6806665	6807464	800	113	0.950529	0.0599118	0.890617	14006.9	Bd1-1vsBd3-1	CG
Bd1	11283568	11285047	1480	170	0.0990471	0.940044	-0.840997	-13996.7	Bd1-1vsBd3-1	CG
Bd1	53305361	53306221	861	113	0.0589984	0.908843	-0.849845	-13984.7	Bd1-1vsBd3-1	CG
Bd1	30978520	30979608	1089	153	0.0303611	0.853432	-0.823071	-13876.6	Bd1-1vsBd3-1	CG
Bd1	25356245	25357497	1253	200	0.0698534	0.843265	-0.773412	-13870.3	Bd1-1vsBd3-1	CG
Bd1	5703714	5705262	1549	180	0.956771	0.185575	0.771197	13833.2	Bd1-1vsBd3-1	CG
Bd1	69009207	69010508	1302	216	0.821142	0.0504987	0.770644	13790.1	Bd1-1vsBd3-1	CG
Bd1	14788814	14789729	916	222	0.667374	0.0326901	0.634684	13724.1	Bd1-1vsBd3-1	CG
Bd1	55241827	55243097	1271	253	0.060534	0.744318	-0.683784	-13688.3	Bd1-1vsBd3-1	CG
Bd1	71732669	71733752	1084	182	0.952024	0.193603	0.758421	13679.3	Bd1-1vsBd3-1	CG
Bd1	32506155	32507215	1061	186	0.137348	0.934924	-0.797576	-13668.5	Bd1-1vsBd3-1	CG
Bd1	22540460	22541560	1101	158	0.91301	0.0702202	0.84279	13645.7	Bd1-1vsBd3-1	CG
Bd1	26823409	26824874	1466	222	0.848372	0.0463475	0.802024	13636.7	Bd1-1vsBd3-1	CG
Bd1	74823718	74827290	3573	252	0.947382	0.143312	0.80407	13625.6	Bd1-1vsBd3-1	CG
Bd1	55672463	55673691	1229	180	0.0864917	0.916003	-0.829512	-13614.4	Bd1-1vsBd3-1	CG
Bd1	58471674	58472834	1161	198	0.167682	0.89739	-0.729708	-13598.2	Bd1-1vsBd3-1	CG
Bd1	63622103	63622813	711	128	0.940895	0.0535827	0.887312	13513.2	Bd1-1vsBd3-1	CG
Bd1	23323791	23325116	1326	216	0.167002	0.94569	-0.778689	-13493.8	Bd1-1vsBd3-1	CG
Bd1	17073020	17074221	1202	131	0.0777363	0.944199	-0.866463	-13479.4	Bd1-1vsBd3-1	CG
Bd1	4140426	4141460	1035	198	0.767453	0.052624	0.714829	13317.3	Bd1-1vsBd3-1	CG
Bd1	33647103	33648092	990	120	0.958527	0.0961477	0.86238	13227.5	Bd1-1vsBd3-1	CG
Bd1	53590061	53591376	1316	125	0.0885828	0.955438	-0.866855	-13188.8	Bd1-1vsBd3-1	CG
Bd1	6475275	6477221	1947	206	0.0500122	0.887714	-0.837702	-13079.7	Bd1-1vsBd3-1	CG
Bd1	36524640	36525830	1191	168	0.201209	0.961068	-0.759859	-12987	Bd1-1vsBd3-1	CG
Bd1	71528573	71529805	1233	218	0.203882	0.853488	-0.649606	-12975.6	Bd1-1vsBd3-1	CG
Bd1	26501780	26502706	927	161	0.182982	0.94167	-0.758688	-12903	Bd1-1vsBd3-1	CG
Bd1	58242891	58243993	1103	132	0.0802592	0.945682	-0.865422	-12897.9	Bd1-1vsBd3-1	CG
Bd1	20262935	20263659	725	104	0.959468	0.0449248	0.914543	12775.4	Bd1-1vsBd3-1	CG
Bd1	6538364	6539505	1142	153	0.0501198	0.880974	-0.830855	-12635.1	Bd1-1vsBd3-1	CG
Bd1	57875121	57875916	796	146	0.817001	0.0398033	0.777198	12597.3	Bd1-1vsBd3-1	CG
Bd1	18917891	18918774	884	182	0.9564	0.240541	0.715859	12589.2	Bd1-1vsBd3-1	CG
Bd1	28716474	28717548	1075	210	0.119171	0.854964	-0.735793	-12588.1	Bd1-1vsBd3-1	CG
Bd1	33902199	33902857	659	110	0.954352	0.0472774	0.907074	12575.3	Bd1-1vsBd3-1	CG
Bd1	41158197	41159278	1082	146	0.887794	0.0714688	0.816325	12558.9	Bd1-1vsBd3-1	CG
Bd1	3134968	3136069	1102	166	0.0630832	0.834616	-0.771532	-12551.7	Bd1-1vsBd3-1	CG
Bd1	48761762	48765899	4138	298	0.155018	0.87283	-0.717812	-12520.5	Bd1-1vsBd3-1	CG
Bd1	51570611	51571759	1149	197	0.80011	0.0891371	0.710972	12498.2	Bd1-1vsBd3-1	CG
Bd1	68804569	68805515	947	117	0.928433	0.074846	0.853588	12473.1	Bd1-1vsBd3-1	CG
Bd1	4165208	4166374	1167	218	0.202869	0.914337	-0.711468	-12469.4	Bd1-1vsBd3-1	CG
Bd1	54204361	54206612	2252	209	0.84244	0.0465548	0.795886	12461.2	Bd1-1vsBd3-1	CG
Bd1	4814605	4815979	1375	200	0.0372709	0.814993	-0.777722	-12446.2	Bd1-1vsBd3-1	CG
Bd1	34659986	34664422	4437	314	0.930491	0.223275	0.707217	12424.6	Bd1-1vsBd3-1	CG
Bd1	53179791	53181223	1433	165	0.133727	0.952457	-0.81873	-12409.3	Bd1-1vsBd3-1	CG
Bd1	3019848	3022131	2284	211	0.0993893	0.870457	-0.771067	-12383	Bd1-1vsBd3-1	CG
Bd1	21256952	21258516	1565	166	0.933868	0.129202	0.804666	12365.9	Bd1-1vsBd3-1	CG
Bd1	25074231	25075327	1097	143	0.952373	0.158173	0.7942	12349	Bd1-1vsBd3-1	CG
Bd1	47220172	47220968	797	215	0.883909	0.196951	0.686958	12304.6	Bd1-1vsBd3-1	CG
Bd1	8876925	8877855	931	169	0.268857	0.960353	-0.691496	-12275.5	Bd1-1vsBd3-1	CG
Bd1	56686036	56687048	1013	146	0.954746	0.181269	0.773477	12248.7	Bd1-1vsBd3-1	CG
Bd1	14325527	14326575	1049	156	0.859965	0.0541289	0.805836	12224.5	Bd1-1vsBd3-1	CG
Bd1	42568598	42569670	1073	124	0.95222	0.123679	0.828541	12140.7	Bd1-1vsBd3-1	CG
Bd1	33995136	33998695	3560	234	0.100286	0.944875	-0.844589	-12125.9	Bd1-1vsBd3-1	CG
Bd1	55875832	55877177	1346	170	0.178203	0.934634	-0.756431	-12101.8	Bd1-1vsBd3-1	CG
Bd1	33417278	33418502	1225	206	0.881421	0.0834302	0.797991	12041	Bd1-1vsBd3-1	CG
Bd1	43160064	43161376	1313	163	0.934797	0.100822	0.833975	11987.5	Bd1-1vsBd3-1	CG
Bd1	28380239	28381645	1407	171	0.927574	0.127286	0.800287	11940.3	Bd1-1vsBd3-1	CG
Bd1	26162450	26164270	1821	312	0.0301072	0.59925	-0.569143	-11907.7	Bd1-1vsBd3-1	CG
Bd1	68811433	68812549	1117	208	0.0314501	0.837992	-0.806541	-11878.3	Bd1-1vsBd3-1	CG
Bd1	7036941	7038301	1361	211	0.867881	0.119031	0.748849	11871.8	Bd1-1vsBd3-1	CG
Bd1	70738573	70739894	1322	246	0.765239	0.0636058	0.701633	11803.7	Bd1-1vsBd3-1	CG
Bd1	50503178	50504443	1266	166	0.961938	0.0900534	0.871885	11783	Bd1-1vsBd3-1	CG
Bd1	30970302	30971709	1408	155	0.0700641	0.932694	-0.86263	-11668	Bd1-1vsBd3-1	CG
Bd1	20024215	20026964	2750	203	0.902673	0.103855	0.798818	11662.9	Bd1-1vsBd3-1	CG
Bd1	71114977	71116703	1727	197	0.945488	0.168057	0.777431	11612.6	Bd1-1vsBd3-1	CG
Bd1	34311598	34312542	945	132	0.922202	0.0523439	0.869858	11612.2	Bd1-1vsBd3-1	CG
Bd1	41049117	41050979	1863	196	0.919601	0.10534	0.814261	11561.4	Bd1-1vsBd3-1	CG
Bd1	52985156	52986330	1175	151	0.108616	0.906259	-0.797643	-11555	Bd1-1vsBd3-1	CG
Bd1	23393133	23394471	1339	141	0.0464408	0.836437	-0.789997	-11554.4	Bd1-1vsBd3-1	CG
Bd1	67134784	67137188	2405	196	0.900975	0.0551977	0.845778	11526.2	Bd1-1vsBd3-1	CG
Bd1	32141911	32143211	1301	161	0.0858964	0.898614	-0.812718	-11521.6	Bd1-1vsBd3-1	CG
Bd1	72380000	72381272	1273	160	0.135567	0.865556	-0.729989	-11495.2	Bd1-1vsBd3-1	CG
Bd1	23394944	23395799	856	245	0.837293	0.0913108	0.745982	11488.4	Bd1-1vsBd3-1	CG
Bd1	24038529	24041084	2556	282	0.916661	0.1093	0.807361	11465.1	Bd1-1vsBd3-1	CG
Bd1	50004076	50005207	1132	138	0.865525	0.0500089	0.815516	11344.2	Bd1-1vsBd3-1	CG
Bd1	2345030	2346609	1580	155	0.079991	0.905727	-0.825736	-11320.2	Bd1-1vsBd3-1	CG
Bd1	37185621	37186794	1174	197	0.846271	0.151335	0.694936	11307.3	Bd1-1vsBd3-1	CG
Bd1	35896462	35897963	1502	189	0.147358	0.933356	-0.785998	-11302.7	Bd1-1vsBd3-1	CG
Bd1	39580690	39581480	791	114	0.101718	0.960694	-0.858976	-11254.5	Bd1-1vsBd3-1	CG
Bd1	15685417	15687295	1879	239	0.0552286	0.735368	-0.680139	-11243.1	Bd1-1vsBd3-1	CG
Bd1	42586074	42586931	858	126	0.954403	0.166283	0.78812	11238.8	Bd1-1vsBd3-1	CG
Bd1	27990200	27991227	1028	126	0.855837	0.0537257	0.802112	11181.3	Bd1-1vsBd3-1	CG
Bd1	74111830	74112837	1008	170	0.158067	0.846875	-0.688808	-11135	Bd1-1vsBd3-1	CG
Bd1	5808176	5809599	1424	138	0.0418956	0.843146	-0.801251	-11130.1	Bd1-1vsBd3-1	CG
Bd1	45485654	45486998	1345	142	0.153451	0.945721	-0.79227	-11062.2	Bd1-1vsBd3-1	CG
Bd1	17349484	17350550	1067	124	0.0687932	0.916934	-0.84814	-11050	Bd1-1vsBd3-1	CG
Bd1	15253386	15254602	1217	180	0.364001	0.937207	-0.573206	-11035.3	Bd1-1vsBd3-1	CG
Bd1	53206819	53207727	909	202	0.866807	0.114385	0.752421	11029	Bd1-1vsBd3-1	CG
Bd1	53793438	53794547	1110	127	0.968814	0.0895623	0.879252	11028.7	Bd1-1vsBd3-1	CG
Bd1	37124136	37125459	1324	235	0.872231	0.264147	0.608085	11015.5	Bd1-1vsBd3-1	CG
Bd1	32481441	32482513	1073	128	0.0821008	0.92902	-0.846919	-11001.3	Bd1-1vsBd3-1	CG
Bd1	27018392	27019413	1022	178	0.0602036	0.769269	-0.709066	-10969.6	Bd1-1vsBd3-1	CG
Bd1	21009388	21011505	2118	204	0.933597	0.223546	0.710051	10930.9	Bd1-1vsBd3-1	CG
Bd1	67316748	67317748	1001	220	0.944695	0.273296	0.671398	10819.6	Bd1-1vsBd3-1	CG
Bd1	49396545	49397721	1177	206	0.0294598	0.634385	-0.604925	-10817.2	Bd1-1vsBd3-1	CG
Bd1	19738122	19738830	709	231	0.85067	0.129477	0.721193	10748.6	Bd1-1vsBd3-1	CG
Bd1	37484455	37485317	863	112	0.112173	0.954218	-0.842046	-10745.2	Bd1-1vsBd3-1	CG
Bd1	22852130	22853067	938	135	0.940818	0.078579	0.862239	10703.9	Bd1-1vsBd3-1	CG
Bd1	21839869	21841303	1435	212	0.883078	0.097111	0.785967	10703.4	Bd1-1vsBd3-1	CG
Bd1	955661	957063	1403	252	0.121539	0.791565	-0.670026	-10599	Bd1-1vsBd3-1	CG
Bd1	16108555	16110553	1999	160	0.147095	0.915351	-0.768256	-10583.6	Bd1-1vsBd3-1	CG
Bd1	28710649	28711505	857	124	0.888705	0.0596091	0.829095	10576.9	Bd1-1vsBd3-1	CG
Bd1	34628715	34629793	1079	139	0.819709	0.0423043	0.777405	10485.5	Bd1-1vsBd3-1	CG
Bd1	54647292	54648616	1325	281	0.365068	0.954014	-0.588946	-10460.8	Bd1-1vsBd3-1	CG
Bd1	71093546	71098719	5174	382	0.124819	0.738728	-0.61391	-10434.7	Bd1-1vsBd3-1	CG
Bd1	22839329	22841300	1972	163	0.11538	0.948767	-0.833387	-10427	Bd1-1vsBd3-1	CG
Bd1	58255682	58259398	3717	300	0.890311	0.193204	0.697106	10413.4	Bd1-1vsBd3-1	CG
Bd1	3129739	3130677	939	104	0.911135	0.0436162	0.867518	10331.9	Bd1-1vsBd3-1	CG
Bd1	3707297	3708537	1241	172	0.900352	0.102043	0.798309	10329.7	Bd1-1vsBd3-1	CG
Bd1	34025814	34027092	1279	128	0.923981	0.0863435	0.837637	10321.3	Bd1-1vsBd3-1	CG
Bd1	70526	72554	2029	164	0.17957	0.940788	-0.761217	-10313.8	Bd1-1vsBd3-1	CG
Bd1	44916992	44918118	1127	158	0.0778999	0.897642	-0.819742	-10288.4	Bd1-1vsBd3-1	CG
Bd1	17160196	17161000	805	178	0.100165	0.825891	-0.725726	-10255.8	Bd1-1vsBd3-1	CG
Bd1	31817786	31818696	911	153	0.932688	0.196664	0.736024	10252	Bd1-1vsBd3-1	CG
Bd1	55162688	55163774	1087	182	0.817261	0.109044	0.708217	10132.2	Bd1-1vsBd3-1	CG
Bd1	62872930	62873938	1009	188	0.95622	0.301327	0.654892	10078.8	Bd1-1vsBd3-1	CG
Bd1	68389426	68390384	959	120	0.88438	0.0759299	0.80845	10040	Bd1-1vsBd3-1	CG
Bd1	27705210	27707012	1803	183	0.0495854	0.751855	-0.702269	-9986.58	Bd1-1vsBd3-1	CG
Bd1	62714489	62715444	956	135	0.0621265	0.868612	-0.806486	-9973.65	Bd1-1vsBd3-1	CG
Bd1	13762832	13765190	2359	163	0.073437	0.913249	-0.839812	-9934.18	Bd1-1vsBd3-1	CG
Bd1	18222624	18223661	1038	134	0.960708	0.198206	0.762502	9928.78	Bd1-1vsBd3-1	CG
Bd1	43689074	43690091	1018	135	0.14406	0.934947	-0.790887	-9895.69	Bd1-1vsBd3-1	CG
Bd1	69869150	69870649	1500	207	0.292924	0.79032	-0.497396	-9890.82	Bd1-1vsBd3-1	CG
Bd1	53987839	53988974	1136	141	0.929266	0.162676	0.766589	9881.15	Bd1-1vsBd3-1	CG
Bd1	33683620	33685093	1474	135	0.93756	0.0850459	0.852514	9863.48	Bd1-1vsBd3-1	CG
Bd1	68596602	68597663	1062	116	0.0289244	0.833696	-0.804771	-9800.2	Bd1-1vsBd3-1	CG
Bd1	17547677	17549984	2308	171	0.0708391	0.881253	-0.810414	-9764.6	Bd1-1vsBd3-1	CG
Bd1	11452791	11453935	1145	145	0.83404	0.0522984	0.781742	9740.42	Bd1-1vsBd3-1	CG
Bd1	17016544	17017820	1277	166	0.907455	0.0974882	0.809967	9731.47	Bd1-1vsBd3-1	CG
Bd1	60875162	60876095	934	118	0.120569	0.961752	-0.841182	-9687.61	Bd1-1vsBd3-1	CG
Bd1	15267218	15268059	842	196	0.045091	0.671583	-0.626492	-9650.39	Bd1-1vsBd3-1	CG
Bd1	67614318	67615210	893	102	0.899745	0.0471684	0.852576	9649.16	Bd1-1vsBd3-1	CG
Bd1	2469356	2475175	5820	289	0.874682	0.150387	0.724295	9588.26	Bd1-1vsBd3-1	CG
Bd1	52899607	52901712	2106	184	0.11489	0.945789	-0.8309	-9587.68	Bd1-1vsBd3-1	CG
Bd1	47304528	47307815	3288	265	0.949593	0.262009	0.687584	9529.53	Bd1-1vsBd3-1	CG
Bd1	11323157	11323787	631	101	0.0396929	0.926794	-0.887101	-9491.65	Bd1-1vsBd3-1	CG
Bd1	34439584	34440628	1045	170	0.92645	0.239939	0.686512	9481.76	Bd1-1vsBd3-1	CG
Bd1	55504458	55505935	1478	138	0.1058	0.920131	-0.814331	-9463.92	Bd1-1vsBd3-1	CG
Bd1	42322103	42322964	862	134	0.896151	0.0523647	0.843787	9448.23	Bd1-1vsBd3-1	CG
Bd1	27660840	27661865	1026	133	0.0911286	0.827212	-0.736083	-9415.99	Bd1-1vsBd3-1	CG
Bd1	11783239	11783980	742	151	0.832957	0.151952	0.681004	9398.27	Bd1-1vsBd3-1	CG
Bd1	63643258	63644276	1019	142	0.966342	0.245174	0.721168	9392.28	Bd1-1vsBd3-1	CG
Bd1	41690383	41691375	993	145	0.923385	0.131247	0.792138	9391.26	Bd1-1vsBd3-1	CG
Bd1	25112356	25113221	866	147	0.0966668	0.945002	-0.848335	-9371.51	Bd1-1vsBd3-1	CG
Bd1	37054288	37055247	960	158	0.959675	0.346199	0.613476	9325.31	Bd1-1vsBd3-1	CG
Bd1	53373357	53374494	1138	120	0.935544	0.0768374	0.858707	9276.64	Bd1-1vsBd3-1	CG
Bd1	52517692	52518741	1050	152	0.167994	0.869344	-0.70135	-9263.37	Bd1-1vsBd3-1	CG
Bd1	17133150	17134531	1382	208	0.843823	0.107906	0.735917	9245.86	Bd1-1vsBd3-1	CG
Bd1	48110001	48111406	1406	126	0.0653007	0.883237	-0.817936	-9237.47	Bd1-1vsBd3-1	CG
Bd1	5675150	5676205	1056	109	0.877089	0.0585868	0.818502	9167.96	Bd1-1vsBd3-1	CG
Bd1	4808679	4810154	1476	302	0.855889	0.260636	0.595253	9155.92	Bd1-1vsBd3-1	CG
Bd1	51730586	51731225	640	88	0.906002	0.0252481	0.880754	9130.7	Bd1-1vsBd3-1	CG
Bd1	29711438	29712180	743	86	0.0784503	0.952465	-0.874015	-9099.91	Bd1-1vsBd3-1	CG
Bd1	501912	503918	2007	282	0.583982	0.0691824	0.514799	9069.83	Bd1-1vsBd3-1	CG
Bd1	2759896	2760730	835	134	0.0538161	0.901776	-0.84796	-9065.38	Bd1-1vsBd3-1	CG
Bd1	41855534	41856535	1002	157	0.275716	0.94866	-0.672944	-9029.62	Bd1-1vsBd3-1	CG
Bd1	68747312	68748956	1645	163	0.903632	0.117103	0.78653	9025.56	Bd1-1vsBd3-1	CG
Bd1	15760914	15761752	839	122	0.0837781	0.87658	-0.792802	-9006.9	Bd1-1vsBd3-1	CG
Bd1	34290421	34292518	2098	217	0.905395	0.233451	0.671945	8998.3	Bd1-1vsBd3-1	CG
Bd1	23707309	23708539	1231	182	0.739453	0.0710563	0.668397	8901.68	Bd1-1vsBd3-1	CG
Bd1	8391929	8392846	918	100	0.961388	0.0992559	0.862132	8865.47	Bd1-1vsBd3-1	CG
Bd1	7908040	7909199	1160	136	0.923788	0.12994	0.793848	8860.48	Bd1-1vsBd3-1	CG
Bd1	34237363	34238113	751	232	0.0304414	0.485768	-0.455326	-8854.7	Bd1-1vsBd3-1	CG
Bd1	57558225	57559464	1240	202	0.0561716	0.699176	-0.643004	-8817.95	Bd1-1vsBd3-1	CG
Bd1	40405256	40406927	1672	200	0.898544	0.30537	0.593175	8793.75	Bd1-1vsBd3-1	CG
Bd1	56440701	56442376	1676	104	0.918264	0.106838	0.811426	8780.68	Bd1-1vsBd3-1	CG
Bd1	24017653	24018534	882	137	0.0450747	0.826527	-0.781452	-8729.34	Bd1-1vsBd3-1	CG
Bd1	48754829	48757746	2918	198	0.105804	0.899496	-0.793692	-8660.69	Bd1-1vsBd3-1	CG
Bd1	52486365	52487006	642	88	0.956604	0.0401972	0.916406	8635.65	Bd1-1vsBd3-1	CG
Bd1	57490020	57491124	1105	152	0.0803528	0.892086	-0.811733	-8623.01	Bd1-1vsBd3-1	CG
Bd1	28667787	28668563	777	144	0.944621	0.134647	0.809975	8581.6	Bd1-1vsBd3-1	CG
Bd1	33446259	33447197	939	128	0.942595	0.208249	0.734346	8562.95	Bd1-1vsBd3-1	CG
Bd1	6009798	6010906	1109	122	0.0683132	0.835104	-0.766791	-8519.21	Bd1-1vsBd3-1	CG
Bd1	13557162	13558114	953	122	0.151513	0.868632	-0.717119	-8507.07	Bd1-1vsBd3-1	CG
Bd1	50523175	50524198	1024	195	0.962369	0.281821	0.680548	8476.88	Bd1-1vsBd3-1	CG
Bd1	35191067	35191880	814	118	0.911924	0.114146	0.797778	8459.44	Bd1-1vsBd3-1	CG
Bd1	7148842	7149737	896	166	0.6506	0.0478079	0.602793	8441.42	Bd1-1vsBd3-1	CG
Bd1	23378912	23380230	1319	132	0.950063	0.158133	0.79193	8393.86	Bd1-1vsBd3-1	CG
Bd1	6804960	6805929	970	206	0.289618	0.890153	-0.600535	-8250.54	Bd1-1vsBd3-1	CG
Bd1	71137616	71139073	1458	118	0.930206	0.0583564	0.87185	8220.71	Bd1-1vsBd3-1	CG
Bd1	55145835	55146857	1023	196	0.847168	0.125939	0.72123	8197.54	Bd1-1vsBd3-1	CG
Bd1	51606395	51607341	947	84	0.968351	0.071172	0.897179	8182.43	Bd1-1vsBd3-1	CG
Bd1	4766013	4767168	1156	135	0.0871067	0.839417	-0.75231	-8149.04	Bd1-1vsBd3-1	CG
Bd1	28597068	28598290	1223	172	0.962989	0.17867	0.784319	8139.06	Bd1-1vsBd3-1	CG
Bd1	3510769	3511949	1181	110	0.0930475	0.950433	-0.857386	-8133.55	Bd1-1vsBd3-1	CG
Bd1	15797591	15798730	1140	123	0.0936615	0.893363	-0.799701	-8070.7	Bd1-1vsBd3-1	CG
Bd1	42210704	42211584	881	92	0.930802	0.108202	0.8226	8061.63	Bd1-1vsBd3-1	CG
Bd1	15113268	15114547	1280	177	0.885686	0.247113	0.638572	8053.95	Bd1-1vsBd3-1	CG
Bd1	2640378	2641083	706	115	0.933569	0.100365	0.833204	8025.07	Bd1-1vsBd3-1	CG
Bd1	41809712	41811461	1750	152	0.889063	0.0898082	0.799255	8022.4	Bd1-1vsBd3-1	CG
Bd1	57496892	57497877	986	158	0.0662974	0.716068	-0.64977	-7986.68	Bd1-1vsBd3-1	CG
Bd1	9143225	9144270	1046	186	0.940274	0.282574	0.6577	7949.59	Bd1-1vsBd3-1	CG
Bd1	8976175	8978599	2425	158	0.055697	0.857711	-0.802014	-7925.57	Bd1-1vsBd3-1	CG
Bd1	16157757	16161809	4053	266	0.952979	0.291881	0.661099	7903.91	Bd1-1vsBd3-1	CG
Bd1	33718436	33719389	954	92	0.0532223	0.940966	-0.887744	-7884.14	Bd1-1vsBd3-1	CG
Bd1	28989487	28990845	1359	162	0.191978	0.850234	-0.658256	-7863.12	Bd1-1vsBd3-1	CG
Bd1	23342418	23343365	948	98	0.926462	0.0886232	0.837838	7862.7	Bd1-1vsBd3-1	CG
Bd1	66554403	66555272	870	130	0.826918	0.173162	0.653756	7855.65	Bd1-1vsBd3-1	CG
Bd1	67346035	67346696	662	96	0.189681	0.942679	-0.752998	-7837.77	Bd1-1vsBd3-1	CG
Bd1	735973	737969	1997	123	0.937627	0.0952011	0.842426	7806.66	Bd1-1vsBd3-1	CG
Bd1	27081882	27082760	879	134	0.883858	0.184274	0.699584	7770.65	Bd1-1vsBd3-1	CG
Bd1	37493871	37495118	1248	173	0.890605	0.251772	0.638833	7751	Bd1-1vsBd3-1	CG
Bd1	53002385	53003419	1035	120	0.932908	0.149124	0.783784	7733.95	Bd1-1vsBd3-1	CG
Bd1	71351716	71352978	1263	178	0.133261	0.668143	-0.534882	-7640.48	Bd1-1vsBd3-1	CG
Bd1	7676869	7677770	902	146	0.136489	0.911487	-0.774998	-7628.9	Bd1-1vsBd3-1	CG
Bd1	47215385	47216322	938	206	0.151741	0.837538	-0.685797	-7625.38	Bd1-1vsBd3-1	CG
Bd1	41370792	41371502	711	74	0.0787613	0.961282	-0.88252	-7617.33	Bd1-1vsBd3-1	CG
Bd1	54490527	54491573	1047	117	0.0675374	0.881049	-0.813512	-7615.99	Bd1-1vsBd3-1	CG
Bd1	71985047	71985974	928	104	0.0937201	0.91605	-0.82233	-7602.32	Bd1-1vsBd3-1	CG
Bd1	38625059	38626311	1253	116	0.193601	0.955717	-0.762116	-7577.25	Bd1-1vsBd3-1	CG
Bd1	61780968	61781973	1006	158	0.903954	0.229239	0.674715	7569.11	Bd1-1vsBd3-1	CG
Bd1	52893127	52894037	911	186	0.32754	0.946331	-0.618791	-7563.68	Bd1-1vsBd3-1	CG
Bd1	25622451	25623528	1078	129	0.961455	0.20473	0.756724	7535.65	Bd1-1vsBd3-1	CG
Bd1	58576084	58576848	765	200	0.214867	0.64902	-0.434153	-7526.87	Bd1-1vsBd3-1	CG
Bd1	23755161	23756187	1027	158	0.119504	0.780025	-0.660521	-7517.78	Bd1-1vsBd3-1	CG
Bd1	3260948	3261730	783	170	0.0402741	0.599115	-0.558841	-7510.43	Bd1-1vsBd3-1	CG
Bd1	63721322	63723292	1971	93	0.955148	0.15368	0.801468	7505.48	Bd1-1vsBd3-1	CG
Bd1	24570987	24571975	989	157	0.286427	0.941334	-0.654907	-7503.79	Bd1-1vsBd3-1	CG
Bd1	47738233	47739736	1504	246	0.0660977	0.572146	-0.506048	-7501.56	Bd1-1vsBd3-1	CG
Bd1	49059125	49059744	620	120	0.951659	0.101063	0.850595	7498.18	Bd1-1vsBd3-1	CG
Bd1	57125509	57126706	1198	114	0.910625	0.145035	0.765591	7498.17	Bd1-1vsBd3-1	CG
Bd1	1035455	1036415	961	103	0.8275	0.0450623	0.782437	7495.97	Bd1-1vsBd3-1	CG
Bd1	31826671	31827972	1302	166	0.146869	0.862565	-0.715696	-7461.34	Bd1-1vsBd3-1	CG
Bd1	74817446	74820424	2979	150	0.0516985	0.797211	-0.745512	-7410.77	Bd1-1vsBd3-1	CG
Bd1	23698468	23699713	1246	176	0.0443988	0.66512	-0.620721	-7405.12	Bd1-1vsBd3-1	CG
Bd1	60740039	60740881	843	104	0.122495	0.920277	-0.797782	-7390.37	Bd1-1vsBd3-1	CG
Bd1	43872480	43873711	1232	119	0.066697	0.816036	-0.749338	-7373.87	Bd1-1vsBd3-1	CG
Bd1	20197248	20199000	1753	200	0.936886	0.259769	0.677117	7344.9	Bd1-1vsBd3-1	CG
Bd1	45553338	45554281	944	78	0.928979	0.0464864	0.882493	7339.34	Bd1-1vsBd3-1	CG
Bd1	33863390	33864438	1049	98	0.874583	0.062448	0.812135	7333.56	Bd1-1vsBd3-1	CG
Bd1	21861447	21862503	1057	238	0.803721	0.0669611	0.73676	7325.09	Bd1-1vsBd3-1	CG
Bd1	52530688	52531550	863	88	0.0564083	0.923918	-0.86751	-7245.77	Bd1-1vsBd3-1	CG
Bd1	63546695	63547784	1090	128	0.887986	0.0744209	0.813565	7169.99	Bd1-1vsBd3-1	CG
Bd1	70054349	70055332	984	103	0.144592	0.935798	-0.791206	-7168.76	Bd1-1vsBd3-1	CG
Bd1	12168546	12169586	1041	104	0.878465	0.0731616	0.805304	7134.81	Bd1-1vsBd3-1	CG
Bd1	16535549	16536229	681	154	0.160653	0.746912	-0.586259	-7127.98	Bd1-1vsBd3-1	CG
Bd1	59422487	59423614	1128	124	0.919619	0.239258	0.68036	7107.11	Bd1-1vsBd3-1	CG
Bd1	25363897	25365413	1517	172	0.0465483	0.633337	-0.586788	-7106.76	Bd1-1vsBd3-1	CG
Bd1	16846398	16847318	921	140	0.964364	0.295414	0.668951	7078.49	Bd1-1vsBd3-1	CG
Bd1	13212864	13214563	1700	138	0.934822	0.0777978	0.857024	7078.45	Bd1-1vsBd3-1	CG
Bd1	67049661	67050893	1233	158	0.916266	0.145636	0.77063	7074.47	Bd1-1vsBd3-1	CG
Bd1	7889728	7891675	1948	164	0.101549	0.842211	-0.740662	-7055.26	Bd1-1vsBd3-1	CG
Bd1	7213514	7214407	894	95	0.925535	0.103032	0.822503	7050.74	Bd1-1vsBd3-1	CG
Bd1	69991557	69992166	610	98	0.105624	0.921921	-0.816297	-7049.11	Bd1-1vsBd3-1	CG
Bd1	55330177	55331129	953	96	0.124647	0.964318	-0.839671	-7022.78	Bd1-1vsBd3-1	CG
Bd1	41708967	41709784	818	131	0.223017	0.942007	-0.71899	-7010.28	Bd1-1vsBd3-1	CG
Bd1	57514521	57515433	913	137	0.120128	0.858246	-0.738118	-7001.94	Bd1-1vsBd3-1	CG
Bd1	52354121	52355110	990	108	0.92421	0.146318	0.777891	6974.2	Bd1-1vsBd3-1	CG
Bd1	55744470	55745966	1497	176	0.904249	0.363603	0.540646	6973.35	Bd1-1vsBd3-1	CG
Bd1	9344294	9345361	1068	150	0.224469	0.906805	-0.682336	-6966.59	Bd1-1vsBd3-1	CG
Bd1	11319685	11321125	1441	188	0.733652	0.167978	0.565674	6959.26	Bd1-1vsBd3-1	CG
Bd1	24046821	24047689	869	154	0.930909	0.276759	0.65415	6953.28	Bd1-1vsBd3-1	CG
Bd1	30922918	30924162	1245	136	0.0806192	0.862144	-0.781525	-6940.18	Bd1-1vsBd3-1	CG
Bd1	38550074	38551014	941	129	0.0865269	0.698444	-0.611917	-6883.54	Bd1-1vsBd3-1	CG
Bd1	55496115	55497484	1370	123	0.103803	0.929745	-0.825942	-6879.08	Bd1-1vsBd3-1	CG
Bd1	32004514	32006782	2269	175	0.862725	0.170181	0.692544	6874.76	Bd1-1vsBd3-1	CG
Bd1	1384311	1385115	805	91	0.961339	0.1241	0.837239	6859.67	Bd1-1vsBd3-1	CG
Bd1	1394533	1395491	959	75	0.0964801	0.943894	-0.847414	-6849.45	Bd1-1vsBd3-1	CG
Bd1	54158145	54159753	1609	204	0.809648	0.167839	0.641809	6846.82	Bd1-1vsBd3-1	CG
Bd1	46342907	46344717	1811	369	0.0288339	0.256368	-0.227534	-6813.34	Bd1-1vsBd3-1	CG
Bd1	27824893	27825905	1013	176	0.0472858	0.690231	-0.642945	-6798.03	Bd1-1vsBd3-1	CG
Bd1	6747900	6748683	784	106	0.929687	0.105282	0.824405	6794.67	Bd1-1vsBd3-1	CG
Bd1	23100117	23101107	991	149	0.948747	0.273573	0.675174	6782.31	Bd1-1vsBd3-1	CG
Bd1	18263603	18264313	711	160	0.119605	0.683995	-0.564391	-6741.42	Bd1-1vsBd3-1	CG
Bd1	56878921	56880011	1091	122	0.872111	0.0922917	0.779819	6733.91	Bd1-1vsBd3-1	CG
Bd1	5526151	5526958	808	129	0.9001	0.143668	0.756433	6697.69	Bd1-1vsBd3-1	CG
Bd1	55835101	55835926	826	96	0.866973	0.0454415	0.821531	6670.29	Bd1-1vsBd3-1	CG
Bd1	25983659	25984707	1049	152	0.0990742	0.766965	-0.66789	-6653.32	Bd1-1vsBd3-1	CG
Bd1	68599022	68600350	1329	176	0.832141	0.217407	0.614734	6629.61	Bd1-1vsBd3-1	CG
Bd1	48038496	48039502	1007	130	0.0576033	0.781793	-0.72419	-6620.06	Bd1-1vsBd3-1	CG
Bd1	65368181	65369157	977	92	0.0657235	0.927069	-0.861345	-6613.75	Bd1-1vsBd3-1	CG
Bd1	7493489	7494825	1337	162	0.204029	0.954734	-0.750705	-6605.17	Bd1-1vsBd3-1	CG
Bd1	52994334	52996050	1717	132	0.806024	0.0472124	0.758812	6595.04	Bd1-1vsBd3-1	CG
Bd1	41241053	41241893	841	93	0.102464	0.941447	-0.838983	-6589.73	Bd1-1vsBd3-1	CG
Bd1	11322069	11322827	759	82	0.946447	0.0676138	0.878833	6544.14	Bd1-1vsBd3-1	CG
Bd1	53231431	53232237	807	111	0.830784	0.0669918	0.763793	6543.32	Bd1-1vsBd3-1	CG
Bd1	55363686	55364523	838	152	0.970201	0.407635	0.562566	6534.12	Bd1-1vsBd3-1	CG
Bd1	50211166	50212526	1361	128	0.916404	0.179462	0.736942	6509.7	Bd1-1vsBd3-1	CG
Bd1	53698440	53699367	928	121	0.843637	0.0663319	0.777306	6486.18	Bd1-1vsBd3-1	CG
Bd1	21006621	21007478	858	120	0.238653	0.944346	-0.705693	-6484.27	Bd1-1vsBd3-1	CG
Bd1	56127448	56128288	841	126	0.0773833	0.828501	-0.751117	-6479.1	Bd1-1vsBd3-1	CG
Bd1	68256717	68258393	1677	128	0.962808	0.192585	0.770223	6468.02	Bd1-1vsBd3-1	CG
Bd1	49264816	49267024	2209	312	0.224157	0.687472	-0.463315	-6460.09	Bd1-1vsBd3-1	CG
Bd1	53570738	53571732	995	87	0.0513047	0.870702	-0.819398	-6451.7	Bd1-1vsBd3-1	CG
Bd1	48943561	48947049	3489	185	0.851274	0.069237	0.782037	6425.05	Bd1-1vsBd3-1	CG
Bd1	47679313	47680751	1439	156	0.949249	0.340275	0.608974	6423.91	Bd1-1vsBd3-1	CG
Bd1	53846848	53849002	2155	157	0.134083	0.903012	-0.768928	-6395.02	Bd1-1vsBd3-1	CG
Bd1	54915451	54917936	2486	240	0.396367	0.567026	-0.170659	-6374.44	Bd1-1vsBd3-1	CG
Bd1	46243917	46244668	752	188	0.280844	0.718992	-0.438148	-6367.94	Bd1-1vsBd3-1	CG
Bd1	27882129	27885051	2923	159	0.871978	0.0686423	0.803336	6346.2	Bd1-1vsBd3-1	CG
Bd1	23244592	23245665	1074	111	0.874322	0.0422311	0.832091	6340.19	Bd1-1vsBd3-1	CG
Bd1	56075925	56076717	793	110	0.124744	0.943159	-0.818415	-6294.56	Bd1-1vsBd3-1	CG
Bd1	68416793	68417782	990	130	0.71652	0.0657689	0.650751	6274.94	Bd1-1vsBd3-1	CG
Bd1	40736344	40737132	789	147	0.183177	0.940562	-0.757386	-6256.43	Bd1-1vsBd3-1	CG
Bd1	20733064	20733764	701	105	0.877909	0.0970749	0.780834	6255.66	Bd1-1vsBd3-1	CG
Bd1	15114751	15116344	1594	130	0.136457	0.916267	-0.77981	-6198.58	Bd1-1vsBd3-1	CG
Bd1	23829484	23830186	703	106	0.855385	0.11004	0.745345	6182.99	Bd1-1vsBd3-1	CG
Bd1	34954514	34955643	1130	116	0.710188	0.041227	0.668961	6161.09	Bd1-1vsBd3-1	CG
Bd1	41292204	41293011	808	98	0.05996	0.867406	-0.807446	-6143.88	Bd1-1vsBd3-1	CG
Bd1	53108781	53110144	1364	146	0.0621921	0.701535	-0.639343	-6134.39	Bd1-1vsBd3-1	CG
Bd1	20373022	20374359	1338	124	0.805355	0.151705	0.65365	6132.66	Bd1-1vsBd3-1	CG
Bd1	40664809	40666102	1294	147	0.875864	0.279604	0.59626	6129.48	Bd1-1vsBd3-1	CG
Bd1	26642356	26643230	875	131	0.0521287	0.635157	-0.583028	-6109.88	Bd1-1vsBd3-1	CG
Bd1	61689551	61690372	822	76	0.0804801	0.907328	-0.826848	-6094.65	Bd1-1vsBd3-1	CG
Bd1	73687332	73691287	3956	271	0.529074	0.58118	-0.0521061	-6069.39	Bd1-1vsBd3-1	CG
Bd1	40274206	40275573	1368	173	0.0327218	0.751392	-0.718671	-6061.77	Bd1-1vsBd3-1	CG
Bd1	58089364	58090000	637	104	0.0727171	0.847723	-0.775006	-6044.13	Bd1-1vsBd3-1	CG
Bd1	57081581	57082839	1259	161	0.706976	0.144301	0.562675	6022.29	Bd1-1vsBd3-1	CG
Bd1	11483942	11486279	2338	204	0.25285	0.813593	-0.560743	-5990.37	Bd1-1vsBd3-1	CG
Bd1	3568798	3570071	1274	148	0.104264	0.763661	-0.659397	-5958.85	Bd1-1vsBd3-1	CG
Bd1	5969527	5970826	1300	124	0.256239	0.959685	-0.703446	-5956.5	Bd1-1vsBd3-1	CG
Bd1	56739662	56741020	1359	112	0.115306	0.892149	-0.776843	-5952.6	Bd1-1vsBd3-1	CG
Bd1	52933396	52933931	536	66	0.0339621	0.854495	-0.820533	-5947.04	Bd1-1vsBd3-1	CG
Bd1	36541850	36543115	1266	112	0.943739	0.183576	0.760163	5931.1	Bd1-1vsBd3-1	CG
Bd1	49399964	49401338	1375	196	0.301939	0.703597	-0.401657	-5912.07	Bd1-1vsBd3-1	CG
Bd1	64303410	64304143	734	103	0.207363	0.940871	-0.733508	-5898.91	Bd1-1vsBd3-1	CG
Bd1	41293419	41294639	1221	110	0.23655	0.956517	-0.719967	-5898.48	Bd1-1vsBd3-1	CG
Bd1	13091310	13092171	862	89	0.895502	0.0615027	0.833999	5885.27	Bd1-1vsBd3-1	CG
Bd1	46808092	46808849	758	81	0.926777	0.0980424	0.828734	5848.5	Bd1-1vsBd3-1	CG
Bd1	24878507	24879178	672	101	0.0795585	0.860028	-0.78047	-5798.18	Bd1-1vsBd3-1	CG
Bd1	69467386	69468496	1111	94	0.0917305	0.907252	-0.815521	-5794.87	Bd1-1vsBd3-1	CG
Bd1	15245279	15247237	1959	166	0.881944	0.181718	0.700226	5766.62	Bd1-1vsBd3-1	CG
Bd1	35716668	35717571	904	112	0.888146	0.139606	0.74854	5733.51	Bd1-1vsBd3-1	CG
Bd1	21239127	21240204	1078	96	0.0973206	0.940331	-0.843011	-5731.21	Bd1-1vsBd3-1	CG
Bd1	49033338	49034475	1138	176	0.264269	0.866537	-0.602268	-5719.64	Bd1-1vsBd3-1	CG
Bd1	9177086	9178078	993	92	0.137315	0.925401	-0.788086	-5709.72	Bd1-1vsBd3-1	CG
Bd1	20207898	20208630	733	110	0.178863	0.808879	-0.630016	-5689.76	Bd1-1vsBd3-1	CG
Bd1	1343107	1344225	1119	146	0.826116	0.196244	0.629871	5682.73	Bd1-1vsBd3-1	CG
Bd1	39636541	39637336	796	94	0.804822	0.04591	0.758912	5681.5	Bd1-1vsBd3-1	CG
Bd1	12966182	12966918	737	98	0.869778	0.115254	0.754523	5664.42	Bd1-1vsBd3-1	CG
Bd1	2141544	2142826	1283	142	0.142883	0.919693	-0.776809	-5658.11	Bd1-1vsBd3-1	CG
Bd1	11356194	11356929	736	132	0.726296	0.0586007	0.667696	5647.49	Bd1-1vsBd3-1	CG
Bd1	64874859	64876732	1874	148	0.0728586	0.731781	-0.658922	-5645.65	Bd1-1vsBd3-1	CG
Bd1	58168122	58170889	2768	175	0.910761	0.274176	0.636585	5623.16	Bd1-1vsBd3-1	CG
Bd1	34344044	34344726	683	88	0.830944	0.0576508	0.773293	5559.2	Bd1-1vsBd3-1	CG
Bd1	56854006	56855006	1001	127	0.242609	0.926762	-0.684153	-5543.93	Bd1-1vsBd3-1	CG
Bd1	250267	251548	1282	114	0.915153	0.0793262	0.835827	5538.21	Bd1-1vsBd3-1	CG
Bd1	25102612	25104026	1415	142	0.846031	0.0711998	0.774831	5531.04	Bd1-1vsBd3-1	CG
Bd1	58110191	58110934	744	176	0.0357592	0.536844	-0.501085	-5494.94	Bd1-1vsBd3-1	CG
Bd1	45030537	45031631	1095	98	0.0781149	0.869345	-0.79123	-5487.07	Bd1-1vsBd3-1	CG
Bd1	22575263	22577512	2250	336	0.511702	0.365486	0.146216	5478.24	Bd1-1vsBd3-1	CG
Bd1	27777363	27778805	1443	87	0.14328	0.931788	-0.788507	-5428.39	Bd1-1vsBd3-1	CG
Bd1	29831264	29832137	874	107	0.131021	0.848396	-0.717375	-5381.92	Bd1-1vsBd3-1	CG
Bd1	25893452	25894766	1315	101	0.076893	0.944368	-0.867475	-5380.89	Bd1-1vsBd3-1	CG
Bd1	2201800	2203041	1242	140	0.137604	0.892026	-0.754422	-5366.6	Bd1-1vsBd3-1	CG
Bd1	7082463	7084884	2422	138	0.105401	0.927896	-0.822494	-5313.17	Bd1-1vsBd3-1	CG
Bd1	48876139	48877356	1218	94	0.114354	0.920133	-0.805778	-5297.36	Bd1-1vsBd3-1	CG
Bd1	47167650	47168488	839	171	0.907278	0.363131	0.544147	5279.17	Bd1-1vsBd3-1	CG
Bd1	21007866	21008599	734	98	0.944551	0.218112	0.726439	5268.57	Bd1-1vsBd3-1	CG
Bd1	44906421	44907137	717	74	0.114433	0.934596	-0.820163	-5264.44	Bd1-1vsBd3-1	CG
Bd1	38801306	38802007	702	82	0.102407	0.873454	-0.771047	-5251.58	Bd1-1vsBd3-1	CG
Bd1	14908948	14910017	1070	134	0.775728	0.109828	0.6659	5237.27	Bd1-1vsBd3-1	CG
Bd1	68819385	68820450	1066	118	0.970698	0.280885	0.689812	5229.22	Bd1-1vsBd3-1	CG
Bd1	66436519	66437345	827	90	0.929038	0.207464	0.721574	5216.58	Bd1-1vsBd3-1	CG
Bd1	22056592	22057386	795	106	0.862498	0.0738794	0.788619	5193.68	Bd1-1vsBd3-1	CG
Bd1	27603184	27603758	575	82	0.0802061	0.909285	-0.829079	-5180.91	Bd1-1vsBd3-1	CG
Bd1	4719879	4721408	1530	116	0.936909	0.162072	0.774837	5177.86	Bd1-1vsBd3-1	CG
Bd1	26206261	26207027	767	86	0.951338	0.163942	0.787396	5170.16	Bd1-1vsBd3-1	CG
Bd1	67971070	67972756	1687	113	0.916071	0.143697	0.772374	5103.25	Bd1-1vsBd3-1	CG
Bd1	40290940	40291819	880	110	0.86836	0.210511	0.657848	5101.09	Bd1-1vsBd3-1	CG
Bd1	40928135	40929557	1423	108	0.870118	0.11829	0.751828	5081.63	Bd1-1vsBd3-1	CG
Bd1	64069032	64069908	877	110	0.846336	0.134788	0.711549	5062.81	Bd1-1vsBd3-1	CG
Bd1	29773222	29773861	640	64	0.056582	0.928823	-0.872241	-5057.47	Bd1-1vsBd3-1	CG
Bd1	69097067	69097719	653	118	0.840627	0.204824	0.635803	5056.62	Bd1-1vsBd3-1	CG
Bd1	57321665	57322361	697	134	0.314118	0.810798	-0.49668	-5035.12	Bd1-1vsBd3-1	CG
Bd1	16766813	16767808	996	108	0.0382698	0.811056	-0.772786	-5029.81	Bd1-1vsBd3-1	CG
Bd1	45447464	45449936	2473	116	0.92397	0.112998	0.810972	5001.58	Bd1-1vsBd3-1	CG
Bd1	51207305	51208404	1100	164	0.111698	0.833973	-0.722275	-4998.33	Bd1-1vsBd3-1	CG
Bd1	47935864	47936584	721	87	0.157623	0.932165	-0.774542	-4950.96	Bd1-1vsBd3-1	CG
Bd1	4249670	4250579	910	112	0.647407	0.0470969	0.60031	4928.44	Bd1-1vsBd3-1	CG
Bd1	4509644	4510511	868	100	0.833141	0.163353	0.669788	4919.84	Bd1-1vsBd3-1	CG
Bd1	12176496	12177183	688	102	0.940623	0.203184	0.737438	4916.46	Bd1-1vsBd3-1	CG
Bd1	17128527	17129307	781	125	0.87032	0.327511	0.542809	4909.36	Bd1-1vsBd3-1	CG
Bd1	28133295	28133991	697	106	0.0540576	0.732255	-0.678197	-4909.14	Bd1-1vsBd3-1	CG
Bd1	50639984	50641409	1426	140	0.119055	0.798623	-0.679568	-4904	Bd1-1vsBd3-1	CG
Bd1	13743568	13744811	1244	210	0.676125	0.0708762	0.605248	4898.5	Bd1-1vsBd3-1	CG
Bd1	27207613	27208565	953	216	0.266907	0.642645	-0.375738	-4896.72	Bd1-1vsBd3-1	CG
Bd1	43645316	43646100	785	90	0.24832	0.962045	-0.713725	-4888.87	Bd1-1vsBd3-1	CG
Bd1	54237304	54238217	914	112	0.218864	0.948338	-0.729473	-4887.9	Bd1-1vsBd3-1	CG
Bd1	33369206	33369899	694	108	0.239671	0.860974	-0.621303	-4877.81	Bd1-1vsBd3-1	CG
Bd1	13314	14086	773	103	0.932299	0.1589	0.773399	4873.87	Bd1-1vsBd3-1	CG
Bd1	48019379	48020051	673	85	0.147224	0.917004	-0.769781	-4871.48	Bd1-1vsBd3-1	CG
Bd1	26120363	26121390	1028	95	0.201174	0.958348	-0.757175	-4855.01	Bd1-1vsBd3-1	CG
Bd1	8668093	8669110	1018	160	0.637079	0.173797	0.463283	4854.94	Bd1-1vsBd3-1	CG
Bd1	67174622	67176316	1695	124	0.139454	0.905759	-0.766305	-4836.37	Bd1-1vsBd3-1	CG
Bd1	50975043	50975602	560	81	0.882562	0.0680105	0.814552	4835.92	Bd1-1vsBd3-1	CG
Bd1	22159262	22160041	780	91	0.798759	0.0508408	0.747918	4829.55	Bd1-1vsBd3-1	CG
Bd1	1205066	1206101	1036	186	0.808367	0.218434	0.589933	4827.96	Bd1-1vsBd3-1	CG
Bd1	40930791	40931846	1056	128	0.873649	0.300004	0.573645	4826.67	Bd1-1vsBd3-1	CG
Bd1	53307732	53309341	1610	111	0.95317	0.227504	0.725666	4819.49	Bd1-1vsBd3-1	CG
Bd1	40570925	40572240	1316	158	0.857652	0.265411	0.592241	4797.88	Bd1-1vsBd3-1	CG
Bd1	68601323	68603758	2436	326	0.603482	0.388016	0.215466	4794.37	Bd1-1vsBd3-1	CG
Bd1	27332559	27333141	583	108	0.828083	0.0351145	0.792968	4784.86	Bd1-1vsBd3-1	CG
Bd1	7104090	7104864	775	94	0.0381535	0.649305	-0.611151	-4782.48	Bd1-1vsBd3-1	CG
Bd1	27782453	27783585	1133	88	0.105315	0.928437	-0.823123	-4762.17	Bd1-1vsBd3-1	CG
Bd1	54341513	54342302	790	84	0.0576706	0.915373	-0.857703	-4740.94	Bd1-1vsBd3-1	CG
Bd1	24627275	24627954	680	98	0.9306	0.236087	0.694512	4723.19	Bd1-1vsBd3-1	CG
Bd1	41116807	41121573	4767	920	0.637504	0.955982	-0.318478	-4717.62	Bd1-1vsBd3-1	CG
Bd1	18523284	18524454	1171	83	0.944346	0.0897073	0.854639	4698.07	Bd1-1vsBd3-1	CG
Bd1	786832	787697	866	92	0.91186	0.10143	0.810429	4680.5	Bd1-1vsBd3-1	CG
Bd1	57161440	57162581	1142	241	0.939937	0.504023	0.435914	4656.93	Bd1-1vsBd3-1	CG
Bd1	16414771	16416697	1927	106	0.0891326	0.855949	-0.766817	-4648.64	Bd1-1vsBd3-1	CG
Bd1	53216894	53218430	1537	144	0.271837	0.903134	-0.631297	-4624.51	Bd1-1vsBd3-1	CG
Bd1	72789468	72790836	1369	121	0.870102	0.216043	0.654059	4604.55	Bd1-1vsBd3-1	CG
Bd1	50171354	50172302	949	88	0.0480459	0.857095	-0.809049	-4589.84	Bd1-1vsBd3-1	CG
Bd1	47943809	47945610	1802	100	0.914175	0.0862267	0.827948	4586.41	Bd1-1vsBd3-1	CG
Bd1	43471990	43472630	641	64	0.0327267	0.866671	-0.833944	-4579.14	Bd1-1vsBd3-1	CG
Bd1	39224478	39225146	669	66	0.820797	0.0355798	0.785217	4574.96	Bd1-1vsBd3-1	CG
Bd1	14656172	14656718	547	98	0.900312	0.0649766	0.835336	4567.06	Bd1-1vsBd3-1	CG
Bd1	23034621	23035456	836	142	0.523154	0.0663056	0.456849	4555.73	Bd1-1vsBd3-1	CG
Bd1	58410254	58410860	607	72	0.0377765	0.768518	-0.730741	-4537.36	Bd1-1vsBd3-1	CG
Bd1	73636390	73637191	802	118	0.348021	0.907095	-0.559074	-4522.4	Bd1-1vsBd3-1	CG
Bd1	48885111	48885687	577	51	0.920366	0.0433209	0.877045	4513.17	Bd1-1vsBd3-1	CG
Bd1	28120299	28121699	1401	124	0.0808559	0.769634	-0.688778	-4510.39	Bd1-1vsBd3-1	CG
Bd1	61006848	61007937	1090	105	0.286825	0.93825	-0.651424	-4499.42	Bd1-1vsBd3-1	CG
Bd1	14722068	14722780	713	75	0.905247	0.142861	0.762386	4486.97	Bd1-1vsBd3-1	CG
Bd1	19749457	19750250	794	88	0.771802	0.0299843	0.741818	4484.06	Bd1-1vsBd3-1	CG
Bd1	18140517	18141230	714	92	0.225938	0.921269	-0.695331	-4471.5	Bd1-1vsBd3-1	CG
Bd1	57309671	57311822	2152	239	0.0321121	0.402338	-0.370226	-4469.59	Bd1-1vsBd3-1	CG
Bd1	64136553	64137541	989	85	0.0931598	0.803093	-0.709933	-4465.79	Bd1-1vsBd3-1	CG
Bd1	50407643	50409232	1590	170	0.543515	0.243653	0.299862	4434.73	Bd1-1vsBd3-1	CG
Bd1	834355	836027	1673	116	0.887817	0.228192	0.659625	4430.66	Bd1-1vsBd3-1	CG
Bd1	35645446	35646200	755	76	0.865299	0.148746	0.716553	4422.9	Bd1-1vsBd3-1	CG
Bd1	60818049	60821195	3147	155	0.0584605	0.826297	-0.767836	-4407.88	Bd1-1vsBd3-1	CG
Bd1	11977659	11979461	1803	88	0.936543	0.0658936	0.87065	4402.34	Bd1-1vsBd3-1	CG
Bd1	4739895	4740898	1004	94	0.0745613	0.872162	-0.7976	-4390.82	Bd1-1vsBd3-1	CG
Bd1	48758785	48761521	2737	156	0.153405	0.904493	-0.751088	-4372.6	Bd1-1vsBd3-1	CG
Bd1	34763847	34765405	1559	112	0.190706	0.950048	-0.759343	-4368.9	Bd1-1vsBd3-1	CG
Bd1	42405776	42407061	1286	92	0.0974072	0.901941	-0.804534	-4365.59	Bd1-1vsBd3-1	CG
Bd1	848647	849329	683	88	0.0697369	0.804297	-0.73456	-4359.75	Bd1-1vsBd3-1	CG
Bd1	14865701	14866533	833	155	0.661798	0.198683	0.463116	4359.33	Bd1-1vsBd3-1	CG
Bd1	73105157	73106610	1454	126	0.114181	0.805515	-0.691334	-4349.37	Bd1-1vsBd3-1	CG
Bd1	17612556	17613176	621	134	0.737131	0.155908	0.581223	4334.6	Bd1-1vsBd3-1	CG
Bd1	18941081	18941856	776	99	0.25487	0.885415	-0.630545	-4331.59	Bd1-1vsBd3-1	CG
Bd1	56511653	56512802	1150	117	0.0949605	0.771759	-0.676799	-4321.88	Bd1-1vsBd3-1	CG
Bd1	61519192	61520744	1553	132	0.955577	0.383782	0.571796	4310.6	Bd1-1vsBd3-1	CG
Bd1	17068841	17070299	1459	131	0.86393	0.290942	0.572988	4304.37	Bd1-1vsBd3-1	CG
Bd1	62446978	62448389	1412	104	0.870311	0.160972	0.709339	4303.37	Bd1-1vsBd3-1	CG
Bd1	60016253	60017101	849	92	0.264785	0.94973	-0.684944	-4295.49	Bd1-1vsBd3-1	CG
Bd1	2153690	2154394	705	84	0.864792	0.169008	0.695784	4280.85	Bd1-1vsBd3-1	CG
Bd1	27886079	27890249	4171	199	0.786703	0.0953738	0.691329	4275.32	Bd1-1vsBd3-1	CG
Bd1	13676534	13677434	901	96	0.278182	0.948253	-0.670071	-4274.13	Bd1-1vsBd3-1	CG
Bd1	58079545	58080264	720	112	0.154699	0.849101	-0.694402	-4269.16	Bd1-1vsBd3-1	CG
Bd1	61556725	61557577	853	108	0.181218	0.837552	-0.656334	-4263.1	Bd1-1vsBd3-1	CG
Bd1	30390125	30391023	899	123	0.758056	0.195604	0.562452	4253.93	Bd1-1vsBd3-1	CG
Bd1	22391165	22391755	591	98	0.0579455	0.773189	-0.715243	-4245.37	Bd1-1vsBd3-1	CG
Bd1	30974506	30975253	748	104	0.841906	0.0721304	0.769775	4239.4	Bd1-1vsBd3-1	CG
Bd1	19812293	19813149	857	72	0.941869	0.0813151	0.860554	4233.55	Bd1-1vsBd3-1	CG
Bd1	65715389	65716142	754	72	0.886331	0.19309	0.693241	4231.55	Bd1-1vsBd3-1	CG
Bd1	28203167	28203848	682	92	0.161273	0.903083	-0.74181	-4229.23	Bd1-1vsBd3-1	CG
Bd1	49098133	49099270	1138	92	0.924038	0.125831	0.798207	4221.12	Bd1-1vsBd3-1	CG
Bd1	32874716	32875761	1046	140	0.885233	0.249065	0.636168	4216.42	Bd1-1vsBd3-1	CG
Bd1	14889350	14889952	603	138	0.152157	0.628738	-0.476581	-4216.41	Bd1-1vsBd3-1	CG
Bd1	4768954	4769835	882	106	0.127241	0.802609	-0.675368	-4207.1	Bd1-1vsBd3-1	CG
Bd1	57291183	57292215	1033	86	0.967075	0.21165	0.755425	4199.44	Bd1-1vsBd3-1	CG
Bd1	56042136	56042874	739	130	0.296212	0.888508	-0.592296	-4198.22	Bd1-1vsBd3-1	CG
Bd1	34113414	34114044	631	86	0.924485	0.184497	0.739988	4193.49	Bd1-1vsBd3-1	CG
Bd1	11478972	11480024	1053	113	0.787093	0.11052	0.676572	4189.5	Bd1-1vsBd3-1	CG
Bd1	49371423	49372145	723	77	0.110885	0.919625	-0.80874	-4187.59	Bd1-1vsBd3-1	CG
Bd1	14771347	14772206	860	175	0.0402511	0.40013	-0.359879	-4167.18	Bd1-1vsBd3-1	CG
Bd1	60690489	60691399	911	112	0.160184	0.941075	-0.780891	-4156.93	Bd1-1vsBd3-1	CG
Bd1	72529260	72529931	672	98	0.323548	0.937385	-0.613837	-4147.79	Bd1-1vsBd3-1	CG
Bd1	58165394	58167178	1785	136	0.239354	0.905121	-0.665767	-4147.63	Bd1-1vsBd3-1	CG
Bd1	52890928	52892010	1083	89	0.210055	0.955291	-0.745236	-4145.73	Bd1-1vsBd3-1	CG
Bd1	42360541	42362772	2232	127	0.848309	0.115364	0.732945	4143.79	Bd1-1vsBd3-1	CG
Bd1	57997735	57999014	1280	165	0.946389	0.391931	0.554458	4142.7	Bd1-1vsBd3-1	CG
Bd1	60976284	60978190	1907	126	0.953217	0.270762	0.682455	4124.73	Bd1-1vsBd3-1	CG
Bd1	3612277	3614648	2372	124	0.958277	0.255468	0.702808	4120.04	Bd1-1vsBd3-1	CG
Bd1	5169205	5170046	842	108	0.706688	0.0822718	0.624416	4119.41	Bd1-1vsBd3-1	CG
Bd1	58368777	58369651	875	66	0.0677791	0.828886	-0.761107	-4116.18	Bd1-1vsBd3-1	CG
Bd1	61128848	61130815	1968	125	0.870182	0.208374	0.661808	4103.37	Bd1-1vsBd3-1	CG
Bd1	57680418	57682956	2539	206	0.0523464	0.611776	-0.559429	-4080.27	Bd1-1vsBd3-1	CG
Bd1	22922822	22923722	901	101	0.867154	0.15131	0.715843	4075.95	Bd1-1vsBd3-1	CG
Bd1	43385876	43387617	1742	106	0.0797112	0.838896	-0.759185	-4063.26	Bd1-1vsBd3-1	CG
Bd1	56493014	56494282	1269	174	0.0607674	0.461255	-0.400488	-4056.69	Bd1-1vsBd3-1	CG
Bd1	42021765	42022527	763	91	0.958388	0.246357	0.712031	4046.73	Bd1-1vsBd3-1	CG
Bd1	22003186	22006254	3069	664	0.950029	0.688089	0.261941	4018.56	Bd1-1vsBd3-1	CG
Bd1	27601863	27603042	1180	111	0.763441	0.0392252	0.724216	4009.83	Bd1-1vsBd3-1	CG
Bd1	53495851	53496437	587	67	0.044497	0.814696	-0.770199	-4005.85	Bd1-1vsBd3-1	CG
Bd1	2330495	2331262	768	85	0.8977	0.0980638	0.799636	3996.78	Bd1-1vsBd3-1	CG
Bd1	17841298	17842038	741	70	0.910722	0.152736	0.757986	3988.71	Bd1-1vsBd3-1	CG
Bd1	21815096	21816316	1221	85	0.961518	0.282469	0.679049	3986.16	Bd1-1vsBd3-1	CG
Bd1	30139959	30141467	1509	118	0.632912	0.0553334	0.577579	3978.96	Bd1-1vsBd3-1	CG
Bd1	24015555	24016339	785	80	0.183873	0.933749	-0.749876	-3972.64	Bd1-1vsBd3-1	CG
Bd1	62214319	62215112	794	90	0.183257	0.815885	-0.632628	-3963.26	Bd1-1vsBd3-1	CG
Bd1	958673	959504	832	142	0.370583	0.879003	-0.508421	-3957.09	Bd1-1vsBd3-1	CG
Bd1	4500384	4501549	1166	101	0.176513	0.945964	-0.769451	-3949.67	Bd1-1vsBd3-1	CG
Bd1	3466633	3467598	966	87	0.950187	0.162222	0.787964	3946.33	Bd1-1vsBd3-1	CG
Bd1	55942125	55943429	1305	109	0.952389	0.259552	0.692837	3939.46	Bd1-1vsBd3-1	CG
Bd1	21359370	21360125	756	76	0.0628143	0.811506	-0.748692	-3933.29	Bd1-1vsBd3-1	CG
Bd1	53131274	53132188	915	124	0.0332103	0.569303	-0.536092	-3933.01	Bd1-1vsBd3-1	CG
Bd1	68285690	68287428	1739	134	0.704991	0.0509121	0.654079	3918.8	Bd1-1vsBd3-1	CG
Bd1	68813674	68814701	1028	104	0.174535	0.830229	-0.655694	-3906.71	Bd1-1vsBd3-1	CG
Bd1	25403648	25405264	1617	124	0.225966	0.826014	-0.600048	-3905.93	Bd1-1vsBd3-1	CG
Bd1	832061	833768	1708	110	0.89714	0.253547	0.643593	3900.77	Bd1-1vsBd3-1	CG
Bd1	31479941	31480773	833	92	0.127262	0.803427	-0.676165	-3898.08	Bd1-1vsBd3-1	CG
Bd1	39335674	39336674	1001	92	0.956779	0.290278	0.666501	3888.93	Bd1-1vsBd3-1	CG
Bd1	8577021	8577681	661	75	0.0427281	0.818429	-0.775701	-3888.56	Bd1-1vsBd3-1	CG
Bd1	26278630	26279299	670	78	0.242612	0.948017	-0.705404	-3873.02	Bd1-1vsBd3-1	CG
Bd1	12626722	12627535	814	110	0.934073	0.157334	0.776739	3852.86	Bd1-1vsBd3-1	CG
Bd1	68795088	68795949	862	66	0.837312	0.055254	0.782058	3848.1	Bd1-1vsBd3-1	CG
Bd1	42038884	42041475	2592	550	0.725283	0.960918	-0.235635	-3833.17	Bd1-1vsBd3-1	CG
Bd1	64118211	64119301	1091	117	0.927697	0.247179	0.680518	3830.04	Bd1-1vsBd3-1	CG
Bd1	17867244	17867778	535	116	0.0714307	0.588901	-0.51747	-3825.56	Bd1-1vsBd3-1	CG
Bd1	69126046	69127836	1791	104	0.91128	0.0970831	0.814197	3822.41	Bd1-1vsBd3-1	CG
Bd1	33131196	33134848	3653	198	0.727017	0.160466	0.566551	3795.8	Bd1-1vsBd3-1	CG
Bd1	2279738	2280506	769	110	0.031624	0.541315	-0.509691	-3790.2	Bd1-1vsBd3-1	CG
Bd1	38389563	38390952	1390	99	0.251382	0.950252	-0.69887	-3782.5	Bd1-1vsBd3-1	CG
Bd1	46084360	46085563	1204	122	0.413365	0.954901	-0.541536	-3761.84	Bd1-1vsBd3-1	CG
Bd1	4319923	4320761	839	111	0.0371514	0.598684	-0.561532	-3753.5	Bd1-1vsBd3-1	CG
Bd1	48534645	48537837	3193	632	0.686815	0.952086	-0.265272	-3744.33	Bd1-1vsBd3-1	CG
Bd1	45032737	45033453	717	106	0.23761	0.904426	-0.666815	-3732.83	Bd1-1vsBd3-1	CG
Bd1	33362328	33363023	696	71	0.108503	0.908308	-0.799805	-3725.03	Bd1-1vsBd3-1	CG
Bd1	4128179	4129378	1200	120	0.639084	0.0414379	0.597646	3722.29	Bd1-1vsBd3-1	CG
Bd1	33144338	33145172	835	134	0.167897	0.886048	-0.718151	-3712.19	Bd1-1vsBd3-1	CG
Bd1	4773023	4774628	1606	106	0.786912	0.136768	0.650143	3711.45	Bd1-1vsBd3-1	CG
Bd1	47756220	47757122	903	102	0.181642	0.834178	-0.652536	-3701.78	Bd1-1vsBd3-1	CG
Bd1	14310887	14311771	885	83	0.844052	0.0992974	0.744755	3698.87	Bd1-1vsBd3-1	CG
Bd1	67074110	67074852	743	60	0.888527	0.105606	0.78292	3698.35	Bd1-1vsBd3-1	CG
Bd1	58248896	58250909	2014	162	0.837828	0.267552	0.570276	3670.55	Bd1-1vsBd3-1	CG
Bd1	71117798	71119071	1274	88	0.732321	0.0959745	0.636346	3668.64	Bd1-1vsBd3-1	CG
Bd1	3285896	3286781	886	134	0.942663	0.410479	0.532184	3646.05	Bd1-1vsBd3-1	CG
Bd1	14306674	14308517	1844	190	0.827798	0.328302	0.499496	3635.13	Bd1-1vsBd3-1	CG
Bd1	11494681	11495973	1293	105	0.888059	0.304297	0.583762	3626.35	Bd1-1vsBd3-1	CG
Bd1	4251115	4252055	941	77	0.794824	0.0497445	0.74508	3621.6	Bd1-1vsBd3-1	CG
Bd1	49355768	49356568	801	183	0.107332	0.426165	-0.318833	-3621.45	Bd1-1vsBd3-1	CG
Bd1	51750878	51753113	2236	132	0.941889	0.238611	0.703277	3617.83	Bd1-1vsBd3-1	CG
Bd1	57478659	57480707	2049	141	0.0464692	0.680498	-0.634029	-3617.76	Bd1-1vsBd3-1	CG
Bd1	7078647	7079971	1325	84	0.0643151	0.884671	-0.820356	-3615.33	Bd1-1vsBd3-1	CG
Bd1	53788046	53788801	756	51	0.943532	0.0635325	0.88	3608.02	Bd1-1vsBd3-1	CG
Bd1	25372847	25374431	1585	188	0.766006	0.332704	0.433302	3603.35	Bd1-1vsBd3-1	CG
Bd1	54895459	54896248	790	94	0.841206	0.136579	0.704627	3602.66	Bd1-1vsBd3-1	CG
Bd1	36818679	36822437	3759	616	0.651929	0.954555	-0.302627	-3600.33	Bd1-1vsBd3-1	CG
Bd1	23556067	23557449	1383	232	0.3818	0.681383	-0.299583	-3591.8	Bd1-1vsBd3-1	CG
Bd1	71480574	71481499	926	98	0.069759	0.761357	-0.691598	-3584.7	Bd1-1vsBd3-1	CG
Bd1	2978922	2980027	1106	155	0.382233	0.83901	-0.456776	-3581.96	Bd1-1vsBd3-1	CG
Bd1	33686354	33687508	1155	89	0.884622	0.19807	0.686551	3581.17	Bd1-1vsBd3-1	CG
Bd1	25708112	25708876	765	78	0.201041	0.892797	-0.691756	-3580	Bd1-1vsBd3-1	CG
Bd1	58163862	58164664	803	106	0.328018	0.925738	-0.59772	-3566.7	Bd1-1vsBd3-1	CG
Bd1	58525940	58527044	1105	114	0.0672057	0.711099	-0.643894	-3552.29	Bd1-1vsBd3-1	CG
Bd1	56751686	56753243	1558	148	0.0723937	0.566877	-0.494483	-3547.98	Bd1-1vsBd3-1	CG
Bd1	32714572	32715303	732	75	0.704986	0.0379745	0.667012	3547.46	Bd1-1vsBd3-1	CG
Bd1	21022988	21023733	746	164	0.686948	0.930211	-0.243263	-3541.54	Bd1-1vsBd3-1	CG
Bd1	52512843	52513702	860	87	0.775294	0.0449798	0.730314	3527.73	Bd1-1vsBd3-1	CG
Bd1	27474230	27475008	779	86	0.188547	0.873235	-0.684688	-3511.55	Bd1-1vsBd3-1	CG
Bd1	17274561	17275637	1077	103	0.334802	0.928034	-0.593232	-3508.64	Bd1-1vsBd3-1	CG
Bd1	11834866	11836038	1173	100	0.687266	0.0804056	0.60686	3497.49	Bd1-1vsBd3-1	CG
Bd1	44670620	44671806	1187	104	0.940888	0.272279	0.66861	3494.25	Bd1-1vsBd3-1	CG
Bd1	27789775	27790629	855	114	0.167628	0.750579	-0.58295	-3475.54	Bd1-1vsBd3-1	CG
Bd1	25619625	25620304	680	122	0.59178	0.0607275	0.531053	3467.86	Bd1-1vsBd3-1	CG
Bd1	25375096	25375878	783	96	0.774432	0.114346	0.660086	3467.5	Bd1-1vsBd3-1	CG
Bd1	13353350	13353934	585	67	0.836068	0.0501419	0.785926	3467.12	Bd1-1vsBd3-1	CG
Bd1	11584569	11587411	2843	143	0.160507	0.739624	-0.579117	-3446.23	Bd1-1vsBd3-1	CG
Bd1	8380890	8381702	813	70	0.926611	0.14237	0.784241	3440.2	Bd1-1vsBd3-1	CG
Bd1	21437545	21438499	955	82	0.941122	0.200423	0.7407	3426.67	Bd1-1vsBd3-1	CG
Bd1	66820114	66821224	1111	84	0.148159	0.894229	-0.746071	-3426.16	Bd1-1vsBd3-1	CG
Bd1	31639794	31641558	1765	109	0.690358	0.263271	0.427087	3423.08	Bd1-1vsBd3-1	CG
Bd1	15999727	16000339	613	73	0.887389	0.0916566	0.795732	3407.71	Bd1-1vsBd3-1	CG
Bd1	50289837	50290500	664	136	0.95076	0.501622	0.449139	3404.06	Bd1-1vsBd3-1	CG
Bd1	66922131	66922981	851	153	0.625411	0.118635	0.506776	3393.66	Bd1-1vsBd3-1	CG
Bd1	57982009	57982603	595	78	0.201359	0.897453	-0.696094	-3385.6	Bd1-1vsBd3-1	CG
Bd1	4664832	4665914	1083	76	0.158765	0.912783	-0.754018	-3374.11	Bd1-1vsBd3-1	CG
Bd1	102358	103512	1155	72	0.884238	0.0613051	0.822933	3368.43	Bd1-1vsBd3-1	CG
Bd1	28666873	28667524	652	60	0.0742418	0.950133	-0.875891	-3360.05	Bd1-1vsBd3-1	CG
Bd1	72289856	72291369	1514	124	0.872698	0.184895	0.687803	3347.64	Bd1-1vsBd3-1	CG
Bd1	30902626	30906036	3411	590	0.96044	0.634342	0.326097	3328.21	Bd1-1vsBd3-1	CG
Bd1	72056023	72056785	763	154	0.614915	0.266783	0.348132	3327.67	Bd1-1vsBd3-1	CG
Bd1	2916589	2917171	583	164	0.446691	0.11965	0.32704	3327.47	Bd1-1vsBd3-1	CG
Bd1	6899960	6902267	2308	70	0.10012	0.893833	-0.793713	-3319.61	Bd1-1vsBd3-1	CG
Bd1	52889614	52890441	828	90	0.275913	0.946413	-0.6705	-3312.34	Bd1-1vsBd3-1	CG
Bd1	40807585	40808452	868	104	0.774592	0.0910398	0.683552	3312.31	Bd1-1vsBd3-1	CG
Bd1	30785243	30786580	1338	134	0.0706152	0.743696	-0.673081	-3308.76	Bd1-1vsBd3-1	CG
Bd1	20294740	20295527	788	70	0.0853966	0.790886	-0.705489	-3307.68	Bd1-1vsBd3-1	CG
Bd1	45810666	45811679	1014	121	0.1744	0.684244	-0.509844	-3303.64	Bd1-1vsBd3-1	CG
Bd1	34352125	34353990	1866	82	0.128481	0.942978	-0.814497	-3303.62	Bd1-1vsBd3-1	CG
Bd1	65488496	65489229	734	66	0.909528	0.138267	0.77126	3300.71	Bd1-1vsBd3-1	CG
Bd1	60094541	60095649	1109	88	0.913205	0.140988	0.772217	3298.71	Bd1-1vsBd3-1	CG
Bd1	40624185	40624655	471	54	0.953124	0.135266	0.817857	3288.7	Bd1-1vsBd3-1	CG
Bd1	13377627	13378165	539	54	0.054038	0.841653	-0.787615	-3279.66	Bd1-1vsBd3-1	CG
Bd1	57893867	57894628	762	76	0.810889	0.106107	0.704782	3276.37	Bd1-1vsBd3-1	CG
Bd1	4781179	4782322	1144	87	0.896594	0.232899	0.663696	3255.41	Bd1-1vsBd3-1	CG
Bd1	4780226	4781082	857	68	0.248326	0.937176	-0.68885	-3251.83	Bd1-1vsBd3-1	CG
Bd1	68227948	68229616	1669	77	0.145291	0.867759	-0.722469	-3248.65	Bd1-1vsBd3-1	CG
Bd1	10724879	10725475	597	82	0.224223	0.926991	-0.702767	-3245.18	Bd1-1vsBd3-1	CG
Bd1	46135489	46136111	623	50	0.964939	0.111656	0.853283	3231.43	Bd1-1vsBd3-1	CG
Bd1	56698297	56699160	864	76	0.805591	0.0502567	0.755334	3218.75	Bd1-1vsBd3-1	CG
Bd1	20085744	20086619	876	128	0.920804	0.395611	0.525193	3218.73	Bd1-1vsBd3-1	CG
Bd1	24749468	24750627	1160	69	0.89589	0.057695	0.838195	3218.35	Bd1-1vsBd3-1	CG
Bd1	50716950	50718157	1208	113	0.927067	0.226016	0.70105	3207.04	Bd1-1vsBd3-1	CG
Bd1	53268214	53268867	654	100	0.205839	0.883143	-0.677304	-3205.12	Bd1-1vsBd3-1	CG
Bd1	35554467	35555822	1356	92	0.203909	0.959228	-0.75532	-3202.81	Bd1-1vsBd3-1	CG
Bd1	46420085	46420915	831	86	0.960627	0.261093	0.699534	3194.21	Bd1-1vsBd3-1	CG
Bd1	55090455	55091553	1099	92	0.169394	0.820281	-0.650887	-3192.83	Bd1-1vsBd3-1	CG
Bd1	1682757	1683559	803	106	0.0975663	0.674695	-0.577129	-3187.46	Bd1-1vsBd3-1	CG
Bd1	24328240	24329543	1304	78	0.120723	0.87636	-0.755637	-3186.88	Bd1-1vsBd3-1	CG
Bd1	16086694	16087573	880	95	0.0430933	0.602247	-0.559154	-3177.64	Bd1-1vsBd3-1	CG
Bd1	18956339	18957160	822	114	0.657984	0.0820972	0.575887	3171.54	Bd1-1vsBd3-1	CG
Bd1	28335225	28336016	792	101	0.269543	0.888757	-0.619214	-3170.86	Bd1-1vsBd3-1	CG
Bd1	73932424	73933319	896	108	0.351083	0.906912	-0.555829	-3154.04	Bd1-1vsBd3-1	CG
Bd1	56318995	56319867	873	146	0.0494235	0.411197	-0.361773	-3149.78	Bd1-1vsBd3-1	CG
Bd1	24291682	24292731	1050	84	0.941225	0.204306	0.736919	3147.38	Bd1-1vsBd3-1	CG
Bd1	51311169	51313409	2241	514	0.675085	0.944994	-0.269909	-3132.35	Bd1-1vsBd3-1	CG
Bd1	44139156	44141212	2057	164	0.580977	0.0835157	0.497461	3132.29	Bd1-1vsBd3-1	CG
Bd1	59647767	59648700	934	104	0.762037	0.114748	0.647288	3126.54	Bd1-1vsBd3-1	CG
Bd1	40243278	40244455	1178	178	0.948613	0.266863	0.68175	3125.83	Bd1-1vsBd3-1	CG
Bd1	20532349	20534138	1790	183	0.708718	0.289254	0.419464	3117.59	Bd1-1vsBd3-1	CG
Bd1	32258401	32259215	815	72	0.749233	0.0627724	0.686461	3117.31	Bd1-1vsBd3-1	CG
Bd1	32954503	32955045	543	84	0.177453	0.879005	-0.701552	-3115.32	Bd1-1vsBd3-1	CG
Bd1	50328101	50329253	1153	118	0.289117	0.891981	-0.602864	-3109.89	Bd1-1vsBd3-1	CG
Bd1	26808642	26809670	1029	82	0.14603	0.844581	-0.698551	-3108.56	Bd1-1vsBd3-1	CG
Bd1	55565956	55566710	755	79	0.926204	0.315218	0.610986	3097.99	Bd1-1vsBd3-1	CG
Bd1	19180001	19181387	1387	142	0.557413	0.0731612	0.484251	3069.88	Bd1-1vsBd3-1	CG
Bd1	20229653	20230496	844	76	0.850003	0.148836	0.701167	3057.38	Bd1-1vsBd3-1	CG
Bd1	13897877	13898704	828	69	0.0427683	0.813149	-0.77038	-3041.14	Bd1-1vsBd3-1	CG
Bd1	67944979	67946269	1291	75	0.177989	0.949918	-0.771929	-3040.06	Bd1-1vsBd3-1	CG
Bd1	34177760	34178912	1153	72	0.169945	0.950934	-0.780988	-3035.77	Bd1-1vsBd3-1	CG
Bd1	57758474	57761767	3294	554	0.956801	0.683927	0.272874	3003.24	Bd1-1vsBd3-1	CG
Bd1	51817021	51817558	538	78	0.786192	0.118691	0.667501	2999.86	Bd1-1vsBd3-1	CG
Bd1	74758292	74759599	1308	84	0.851147	0.233321	0.617825	2988.28	Bd1-1vsBd3-1	CG
Bd1	8287590	8288700	1111	100	0.828856	0.187682	0.641174	2987.58	Bd1-1vsBd3-1	CG
Bd1	3023640	3024697	1058	70	0.896215	0.151692	0.744523	2986.19	Bd1-1vsBd3-1	CG
Bd1	34170638	34171298	661	52	0.207556	0.962512	-0.754956	-2983.95	Bd1-1vsBd3-1	CG
Bd1	67339541	67340201	661	144	0.381285	0.0621137	0.319171	2983.18	Bd1-1vsBd3-1	CG
Bd1	41485526	41486920	1395	85	0.723491	0.0488035	0.674687	2982.79	Bd1-1vsBd3-1	CG
Bd1	50206564	50207254	691	86	0.913245	0.210282	0.702964	2979.03	Bd1-1vsBd3-1	CG
Bd1	45173458	45174766	1309	75	0.101642	0.896782	-0.79514	-2964.41	Bd1-1vsBd3-1	CG
Bd1	21506123	21506810	688	106	0.528524	0.0394455	0.489079	2964.07	Bd1-1vsBd3-1	CG
Bd1	47699000	47699731	732	59	0.23611	0.939413	-0.703303	-2959.33	Bd1-1vsBd3-1	CG
Bd1	45322261	45323613	1353	76	0.873815	0.0689715	0.804844	2958.46	Bd1-1vsBd3-1	CG
Bd1	10939743	10940428	686	72	0.954052	0.21756	0.736492	2955.81	Bd1-1vsBd3-1	CG
Bd1	53351889	53352516	628	60	0.864307	0.0901358	0.774171	2941.9	Bd1-1vsBd3-1	CG
Bd1	42811393	42812191	799	75	0.052697	0.728169	-0.675472	-2928.34	Bd1-1vsBd3-1	CG
Bd1	4662828	4664503	1676	119	0.163094	0.815887	-0.652793	-2919.26	Bd1-1vsBd3-1	CG
Bd1	7057116	7057869	754	88	0.901359	0.284554	0.616805	2905.33	Bd1-1vsBd3-1	CG
Bd1	4135382	4136181	800	166	0.650804	0.381635	0.269169	2901.91	Bd1-1vsBd3-1	CG
Bd1	54317924	54319447	1524	118	0.781688	0.142162	0.639525	2897.64	Bd1-1vsBd3-1	CG
Bd1	46673575	46674450	876	68	0.77648	0.0629593	0.713521	2880.5	Bd1-1vsBd3-1	CG
Bd1	41962653	41964463	1811	404	0.724404	0.954146	-0.229743	-2878.91	Bd1-1vsBd3-1	CG
Bd1	504034	504672	639	102	0.767277	0.266769	0.500509	2862.87	Bd1-1vsBd3-1	CG
Bd1	50420888	50421930	1043	158	0.091598	0.449676	-0.358079	-2855.62	Bd1-1vsBd3-1	CG
Bd1	1298672	1299933	1262	128	0.193955	0.498472	-0.304518	-2852.95	Bd1-1vsBd3-1	CG
Bd1	57035959	57037232	1274	67	0.841023	0.0982477	0.742776	2851.33	Bd1-1vsBd3-1	CG
Bd1	49829092	49829778	687	58	0.866764	0.0954875	0.771276	2849.21	Bd1-1vsBd3-1	CG
Bd1	22459519	22460386	868	92	0.0936308	0.810662	-0.717031	-2848.89	Bd1-1vsBd3-1	CG
Bd1	57420245	57422580	2336	409	0.958408	0.652125	0.306283	2845.31	Bd1-1vsBd3-1	CG
Bd1	25801213	25801959	747	109	0.202733	0.821373	-0.61864	-2843.15	Bd1-1vsBd3-1	CG
Bd1	12123477	12124848	1372	100	0.809533	0.372646	0.436887	2842.18	Bd1-1vsBd3-1	CG
Bd1	57162902	57163277	376	51	0.9619	0.0818571	0.880043	2839.88	Bd1-1vsBd3-1	CG
Bd1	27499756	27500850	1095	87	0.0540055	0.706594	-0.652589	-2834.54	Bd1-1vsBd3-1	CG
Bd1	37374124	37374580	457	103	0.162275	0.898263	-0.735988	-2832.05	Bd1-1vsBd3-1	CG
Bd1	70246654	70248046	1393	88	0.950154	0.238675	0.711479	2829.6	Bd1-1vsBd3-1	CG
Bd1	51601463	51602109	647	80	0.764661	0.0375798	0.727081	2828.54	Bd1-1vsBd3-1	CG
Bd1	56575768	56576881	1114	132	0.198293	0.687958	-0.489665	-2828.44	Bd1-1vsBd3-1	CG
Bd1	22231738	22233113	1376	110	0.848996	0.263772	0.585225	2825.91	Bd1-1vsBd3-1	CG
Bd1	27527057	27530541	3485	162	0.818347	0.126941	0.691406	2824.37	Bd1-1vsBd3-1	CG
Bd1	147951	149045	1095	106	0.0831694	0.688833	-0.605663	-2818.99	Bd1-1vsBd3-1	CG
Bd1	45461492	45463752	2261	128	0.706647	0.0683626	0.638284	2815.37	Bd1-1vsBd3-1	CG
Bd1	56578335	56578724	390	52	0.820038	0.047164	0.772874	2813.27	Bd1-1vsBd3-1	CG
Bd1	7711553	7713390	1838	118	0.0417974	0.645577	-0.60378	-2800.75	Bd1-1vsBd3-1	CG
Bd1	52408218	52409056	839	67	0.915512	0.155332	0.76018	2796.76	Bd1-1vsBd3-1	CG
Bd1	53411717	53413195	1479	83	0.0868406	0.883078	-0.796237	-2785.46	Bd1-1vsBd3-1	CG
Bd1	58083241	58083942	702	92	0.606374	0.0432881	0.563086	2783.71	Bd1-1vsBd3-1	CG
Bd1	73107354	73108661	1308	96	0.150105	0.857633	-0.707528	-2779.23	Bd1-1vsBd3-1	CG
Bd1	7080535	7081315	781	82	0.322937	0.942474	-0.619536	-2769.02	Bd1-1vsBd3-1	CG
Bd1	27472685	27473505	821	103	0.590572	0.0611054	0.529466	2767.87	Bd1-1vsBd3-1	CG
Bd1	5096565	5097392	828	93	0.114223	0.703006	-0.588783	-2761.75	Bd1-1vsBd3-1	CG
Bd1	4801591	4802474	884	158	0.0891085	0.678149	-0.58904	-2756.82	Bd1-1vsBd3-1	CG
Bd1	68605253	68606375	1123	118	0.415372	0.910321	-0.494949	-2755.48	Bd1-1vsBd3-1	CG
Bd1	31033682	31035770	2089	454	0.944798	0.703658	0.24114	2748.21	Bd1-1vsBd3-1	CG
Bd1	13531710	13532518	809	88	0.0795451	0.697643	-0.618098	-2737.7	Bd1-1vsBd3-1	CG
Bd1	29669747	29670475	729	60	0.82387	0.063281	0.760589	2732.54	Bd1-1vsBd3-1	CG
Bd1	15827502	15829503	2002	123	0.33557	0.931701	-0.596131	-2731.05	Bd1-1vsBd3-1	CG
Bd1	28054190	28055013	824	63	0.889614	0.103304	0.78631	2721.45	Bd1-1vsBd3-1	CG
Bd1	1236457	1236998	542	74	0.840252	0.100917	0.739335	2719.07	Bd1-1vsBd3-1	CG
Bd1	18347544	18348206	663	81	0.859392	0.223633	0.635759	2715.7	Bd1-1vsBd3-1	CG
Bd1	20258374	20259470	1097	73	0.84659	0.168381	0.678209	2697.85	Bd1-1vsBd3-1	CG
Bd1	58894918	58895824	907	88	0.944695	0.281196	0.663499	2697.02	Bd1-1vsBd3-1	CG
Bd1	34656803	34657579	777	60	0.220225	0.951717	-0.731493	-2696.14	Bd1-1vsBd3-1	CG
Bd1	18049830	18050501	672	78	0.127706	0.806113	-0.678407	-2687.52	Bd1-1vsBd3-1	CG
Bd1	54501709	54502741	1033	90	0.844674	0.176415	0.668259	2683.58	Bd1-1vsBd3-1	CG
Bd1	50116055	50116932	878	84	0.773683	0.099173	0.67451	2676.59	Bd1-1vsBd3-1	CG
Bd1	23469278	23469980	703	84	0.894351	0.329996	0.564355	2675.81	Bd1-1vsBd3-1	CG
Bd1	53866281	53867164	884	84	0.0512522	0.693245	-0.641993	-2675.23	Bd1-1vsBd3-1	CG
Bd1	58447879	58449063	1185	106	0.629394	0.13852	0.490874	2674.1	Bd1-1vsBd3-1	CG
Bd1	47157051	47158976	1926	106	0.104431	0.731471	-0.627039	-2672.64	Bd1-1vsBd3-1	CG
Bd1	67782567	67783423	857	62	0.110621	0.855526	-0.744905	-2668.36	Bd1-1vsBd3-1	CG
Bd1	30794198	30794690	493	130	0.0264584	0.254228	-0.22777	-2666.87	Bd1-1vsBd3-1	CG
Bd1	54203203	54204057	855	63	0.0503732	0.88238	-0.832007	-2666.23	Bd1-1vsBd3-1	CG
Bd1	60409528	60410334	807	112	0.839727	0.390117	0.44961	2663.6	Bd1-1vsBd3-1	CG
Bd1	65992135	65992777	643	88	0.73968	0.120402	0.619278	2663.53	Bd1-1vsBd3-1	CG
Bd1	70714279	70715322	1044	105	0.216604	0.743128	-0.526524	-2662.11	Bd1-1vsBd3-1	CG
Bd1	4590664	4591506	843	54	0.0403671	0.799933	-0.759566	-2661.44	Bd1-1vsBd3-1	CG
Bd1	47985464	47986334	871	68	0.142033	0.892309	-0.750276	-2660.31	Bd1-1vsBd3-1	CG
Bd1	43303008	43303662	655	73	0.937257	0.287624	0.649632	2659.38	Bd1-1vsBd3-1	CG
Bd1	15875966	15876825	860	118	0.812577	0.318555	0.494022	2659.35	Bd1-1vsBd3-1	CG
Bd1	24883791	24884526	736	77	0.0419651	0.706962	-0.664997	-2657.44	Bd1-1vsBd3-1	CG
Bd1	57422822	57425479	2658	468	0.95712	0.653418	0.303702	2651.83	Bd1-1vsBd3-1	CG
Bd1	37473340	37473946	607	76	0.229242	0.9249	-0.695659	-2642.49	Bd1-1vsBd3-1	CG
Bd1	23359662	23360276	615	58	0.0614866	0.837484	-0.775998	-2637.81	Bd1-1vsBd3-1	CG
Bd1	40466053	40466665	613	62	0.776287	0.0528429	0.723444	2627.71	Bd1-1vsBd3-1	CG
Bd1	5172456	5173415	960	102	0.142379	0.775313	-0.632935	-2626.25	Bd1-1vsBd3-1	CG
Bd1	56101422	56102430	1009	66	0.0446532	0.789683	-0.74503	-2616.52	Bd1-1vsBd3-1	CG
Bd1	23789089	23789983	895	74	0.892115	0.152654	0.739461	2613.63	Bd1-1vsBd3-1	CG
Bd1	69290	70314	1025	68	0.305629	0.945168	-0.639539	-2608.09	Bd1-1vsBd3-1	CG
Bd1	19096238	19097235	998	88	0.762078	0.127128	0.63495	2591.31	Bd1-1vsBd3-1	CG
Bd1	27539653	27540297	645	64	0.0706755	0.83813	-0.767454	-2589.43	Bd1-1vsBd3-1	CG
Bd1	5760438	5761045	608	94	0.700273	0.272371	0.427902	2585.44	Bd1-1vsBd3-1	CG
Bd1	62460938	62461633	696	76	0.901934	0.317601	0.584333	2582.26	Bd1-1vsBd3-1	CG
Bd1	42717221	42718500	1280	76	0.889156	0.24792	0.641236	2580.13	Bd1-1vsBd3-1	CG
Bd1	14794551	14795644	1094	106	0.963992	0.456994	0.506998	2580.13	Bd1-1vsBd3-1	CG
Bd1	51500917	51502026	1110	80	0.906026	0.23281	0.673216	2571.29	Bd1-1vsBd3-1	CG
Bd1	6243210	6244121	912	108	0.969758	0.552273	0.417486	2570.29	Bd1-1vsBd3-1	CG
Bd1	48742106	48742713	608	128	0.538311	0.0352871	0.503024	2569.04	Bd1-1vsBd3-1	CG
Bd1	47790165	47791162	998	84	0.670163	0.0973948	0.572768	2558.72	Bd1-1vsBd3-1	CG
Bd1	56274110	56274760	651	94	0.670672	0.213748	0.456924	2552.93	Bd1-1vsBd3-1	CG
Bd1	49453759	49454329	571	102	0.0266568	0.441546	-0.41489	-2551.2	Bd1-1vsBd3-1	CG
Bd1	68304266	68304787	522	68	0.0325427	0.689856	-0.657314	-2549.23	Bd1-1vsBd3-1	CG
Bd1	39628186	39628788	603	58	0.310337	0.965576	-0.655239	-2548.47	Bd1-1vsBd3-1	CG
Bd1	46093198	46094152	955	115	0.950613	0.520134	0.430479	2542.47	Bd1-1vsBd3-1	CG
Bd1	42208834	42209675	842	50	0.0511055	0.943298	-0.892192	-2537.51	Bd1-1vsBd3-1	CG
Bd1	24214501	24215425	925	90	0.604419	0.0564044	0.548015	2533.73	Bd1-1vsBd3-1	CG
Bd1	38312687	38313465	779	124	0.366409	0.0501504	0.316259	2531.64	Bd1-1vsBd3-1	CG
Bd1	60852668	60854058	1391	97	0.276181	0.929017	-0.652836	-2526.41	Bd1-1vsBd3-1	CG
Bd1	29244040	29244852	813	94	0.129201	0.707288	-0.578087	-2517.62	Bd1-1vsBd3-1	CG
Bd1	25525886	25527059	1174	124	0.149467	0.661424	-0.511958	-2512.01	Bd1-1vsBd3-1	CG
Bd1	71684648	71686000	1353	94	0.123537	0.73286	-0.609322	-2507.17	Bd1-1vsBd3-1	CG
Bd1	8924	9707	784	140	0.957049	0.342022	0.615027	2498.26	Bd1-1vsBd3-1	CG
Bd1	55429452	55430170	719	56	0.210166	0.9154	-0.705234	-2496.09	Bd1-1vsBd3-1	CG
Bd1	19087201	19088103	903	120	0.578229	0.187067	0.391162	2490.95	Bd1-1vsBd3-1	CG
Bd1	67459808	67461570	1763	117	0.848603	0.309329	0.539274	2488.23	Bd1-1vsBd3-1	CG
Bd1	47316015	47316565	551	58	0.169703	0.952358	-0.782655	-2487.41	Bd1-1vsBd3-1	CG
Bd1	28671865	28672599	735	68	0.112203	0.759073	-0.646869	-2486.91	Bd1-1vsBd3-1	CG
Bd1	23042031	23042899	869	76	0.722403	0.0810869	0.641316	2486.19	Bd1-1vsBd3-1	CG
Bd1	25079330	25080045	716	71	0.129633	0.795185	-0.665553	-2483.91	Bd1-1vsBd3-1	CG
Bd1	31854195	31854835	641	60	0.797345	0.0524109	0.744934	2479.39	Bd1-1vsBd3-1	CG
Bd1	40298486	40300921	2436	468	0.965586	0.65761	0.307976	2479.25	Bd1-1vsBd3-1	CG
Bd1	29841510	29842238	729	82	0.326969	0.919051	-0.592082	-2470.28	Bd1-1vsBd3-1	CG
Bd1	42112461	42112986	526	132	0.251822	0.556134	-0.304313	-2458.26	Bd1-1vsBd3-1	CG
Bd1	39071585	39073341	1757	388	0.687866	0.956457	-0.268591	-2457.66	Bd1-1vsBd3-1	CG
Bd1	27346777	27349150	2374	101	0.947613	0.241105	0.706508	2454.39	Bd1-1vsBd3-1	CG
Bd1	41946334	41947087	754	102	0.511812	0.045892	0.46592	2453.21	Bd1-1vsBd3-1	CG
Bd1	11327840	11328740	901	67	0.160185	0.922488	-0.762303	-2448.6	Bd1-1vsBd3-1	CG
Bd1	57754278	57756822	2545	476	0.962848	0.66686	0.295988	2448.22	Bd1-1vsBd3-1	CG
Bd1	57543337	57544339	1003	171	0.0354111	0.375238	-0.339826	-2446.49	Bd1-1vsBd3-1	CG
Bd1	5752272	5752869	598	126	0.44233	0.037881	0.404449	2445.27	Bd1-1vsBd3-1	CG
Bd1	68709651	68710937	1287	133	0.410048	0.632586	-0.222538	-2438.4	Bd1-1vsBd3-1	CG
Bd1	94755	95596	842	81	0.267678	0.851842	-0.584165	-2432.48	Bd1-1vsBd3-1	CG
Bd1	12181087	12184790	3704	118	0.951396	0.220195	0.731201	2426.87	Bd1-1vsBd3-1	CG
Bd1	71234178	71235123	946	62	0.073743	0.777599	-0.703856	-2426.82	Bd1-1vsBd3-1	CG
Bd1	18310767	18311328	562	54	0.0503242	0.785449	-0.735125	-2422.44	Bd1-1vsBd3-1	CG
Bd1	42296572	42297341	770	64	0.935601	0.263689	0.671912	2416.5	Bd1-1vsBd3-1	CG
Bd1	45578390	45579906	1517	141	0.811246	0.372604	0.438642	2405.91	Bd1-1vsBd3-1	CG
Bd1	31021459	31023254	1796	432	0.946827	0.672996	0.273831	2383.2	Bd1-1vsBd3-1	CG
Bd1	48217228	48218044	817	66	0.11613	0.814284	-0.698155	-2382.34	Bd1-1vsBd3-1	CG
Bd1	53245928	53246716	789	116	0.532971	0.950682	-0.417712	-2381.01	Bd1-1vsBd3-1	CG
Bd1	40726480	40727502	1023	96	0.86536	0.281534	0.583825	2375.5	Bd1-1vsBd3-1	CG
Bd1	9475971	9476471	501	61	0.845084	0.0769244	0.76816	2375.1	Bd1-1vsBd3-1	CG
Bd1	2613518	2614548	1031	80	0.156692	0.771404	-0.614712	-2372.82	Bd1-1vsBd3-1	CG
Bd1	7737765	7738972	1208	75	0.879504	0.138249	0.741255	2369.51	Bd1-1vsBd3-1	CG
Bd1	16356102	16356856	755	66	0.901668	0.272754	0.628914	2368.12	Bd1-1vsBd3-1	CG
Bd1	13170794	13172015	1222	102	0.43696	0.958796	-0.521836	-2348.88	Bd1-1vsBd3-1	CG
Bd1	61405534	61406390	857	69	0.867007	0.0937467	0.773261	2348.41	Bd1-1vsBd3-1	CG
Bd1	9296416	9297046	631	128	0.326338	0.686245	-0.359906	-2347.59	Bd1-1vsBd3-1	CG
Bd1	20948257	20948862	606	82	0.777372	0.144832	0.63254	2342.34	Bd1-1vsBd3-1	CG
Bd1	44868882	44869752	871	54	0.90848	0.079396	0.829084	2341.38	Bd1-1vsBd3-1	CG
Bd1	59276973	59277941	969	68	0.949648	0.184429	0.765219	2341.29	Bd1-1vsBd3-1	CG
Bd1	64272071	64273170	1100	102	0.13635	0.827567	-0.691217	-2339.89	Bd1-1vsBd3-1	CG
Bd1	791190	792662	1473	137	0.234852	0.933831	-0.698979	-2339.67	Bd1-1vsBd3-1	CG
Bd1	32044374	32045573	1200	166	0.82838	0.593579	0.234801	2338.87	Bd1-1vsBd3-1	CG
Bd1	59738774	59739373	600	80	0.729398	0.238872	0.490526	2337.31	Bd1-1vsBd3-1	CG
Bd1	60928774	60929335	562	128	0.327804	0.794047	-0.466243	-2333.62	Bd1-1vsBd3-1	CG
Bd1	20825403	20826788	1386	330	0.717044	0.960193	-0.243149	-2333.06	Bd1-1vsBd3-1	CG
Bd1	35020090	35020743	654	81	0.299781	0.876906	-0.577125	-2326.41	Bd1-1vsBd3-1	CG
Bd1	60746908	60749163	2256	408	0.718585	0.956501	-0.237916	-2325.84	Bd1-1vsBd3-1	CG
Bd1	47671038	47671575	538	122	0.0286045	0.298123	-0.269519	-2319.35	Bd1-1vsBd3-1	CG
Bd1	53784428	53785070	643	42	0.96162	0.0568626	0.904758	2319.26	Bd1-1vsBd3-1	CG
Bd1	61465482	61466238	757	73	0.940654	0.34593	0.594724	2316.99	Bd1-1vsBd3-1	CG
Bd1	29270332	29271286	955	73	0.854834	0.16185	0.692984	2315.24	Bd1-1vsBd3-1	CG
Bd1	29779549	29780608	1060	85	0.9418	0.295952	0.645848	2313.41	Bd1-1vsBd3-1	CG
Bd1	70155257	70155761	505	112	0.390473	0.0387176	0.351755	2310.21	Bd1-1vsBd3-1	CG
Bd1	18335927	18336693	767	82	0.871918	0.237813	0.634105	2304.11	Bd1-1vsBd3-1	CG
Bd1	40278799	40280123	1325	100	0.86682	0.318503	0.548317	2303.85	Bd1-1vsBd3-1	CG
Bd1	1588376	1589004	629	80	0.376924	0.928198	-0.551274	-2300.08	Bd1-1vsBd3-1	CG
Bd1	39876555	39877525	971	103	0.859492	0.353775	0.505718	2289.06	Bd1-1vsBd3-1	CG
Bd1	6054731	6055227	497	69	0.640339	0.0405058	0.599833	2286.49	Bd1-1vsBd3-1	CG
Bd1	23830318	23831497	1180	90	0.164382	0.791428	-0.627046	-2285.98	Bd1-1vsBd3-1	CG
Bd1	35411505	35413296	1792	340	0.687347	0.952492	-0.265145	-2281.9	Bd1-1vsBd3-1	CG
Bd1	69702673	69704558	1886	127	0.269835	0.901779	-0.631944	-2279.08	Bd1-1vsBd3-1	CG
Bd1	25075994	25076735	742	72	0.849903	0.176146	0.673757	2270.67	Bd1-1vsBd3-1	CG
Bd1	7590881	7591535	655	54	0.0845284	0.923309	-0.83878	-2269.35	Bd1-1vsBd3-1	CG
Bd1	47111992	47112620	629	57	0.80085	0.0981555	0.702694	2266.47	Bd1-1vsBd3-1	CG
Bd1	46753580	46754178	599	114	0.332621	0.0482832	0.284338	2265.5	Bd1-1vsBd3-1	CG
Bd1	6533738	6535067	1330	177	0.44824	0.837783	-0.389543	-2264.1	Bd1-1vsBd3-1	CG
Bd1	19103984	19105155	1172	102	0.727442	0.0988437	0.628598	2263.99	Bd1-1vsBd3-1	CG
Bd1	53742075	53743293	1219	98	0.84029	0.216703	0.623587	2259.4	Bd1-1vsBd3-1	CG
Bd1	28343160	28344015	856	74	0.804062	0.206306	0.597756	2237.42	Bd1-1vsBd3-1	CG
Bd1	48129243	48129836	594	58	0.786733	0.118342	0.668391	2229.73	Bd1-1vsBd3-1	CG
Bd1	28598561	28599209	649	101	0.968827	0.286443	0.682384	2227.62	Bd1-1vsBd3-1	CG
Bd1	59649421	59649987	567	94	0.0775558	0.487807	-0.410251	-2222.77	Bd1-1vsBd3-1	CG
Bd1	72779695	72780435	741	77	0.827703	0.164472	0.663231	2222.15	Bd1-1vsBd3-1	CG
Bd1	8616259	8616733	475	108	0.639337	0.306598	0.332739	2220.86	Bd1-1vsBd3-1	CG
Bd1	57713806	57716212	2407	465	0.961706	0.635922	0.325784	2215.55	Bd1-1vsBd3-1	CG
Bd1	44618428	44620013	1586	375	0.957311	0.731788	0.225523	2213.75	Bd1-1vsBd3-1	CG
Bd1	3939033	3940515	1483	83	0.79921	0.115972	0.683239	2210.29	Bd1-1vsBd3-1	CG
Bd1	23734178	23736239	2062	364	0.722567	0.958237	-0.235671	-2208.79	Bd1-1vsBd3-1	CG
Bd1	33377510	33378877	1368	59	0.941528	0.116983	0.824546	2205.04	Bd1-1vsBd3-1	CG
Bd1	61294847	61295416	570	64	0.971453	0.404493	0.56696	2203.12	Bd1-1vsBd3-1	CG
Bd1	25114058	25114585	528	60	0.164567	0.954949	-0.790382	-2202.39	Bd1-1vsBd3-1	CG
Bd1	10984220	10984949	730	64	0.772043	0.0743975	0.697646	2201.45	Bd1-1vsBd3-1	CG
Bd1	12232618	12233485	868	78	0.734895	0.149444	0.585451	2201.42	Bd1-1vsBd3-1	CG
Bd1	68785285	68785881	597	60	0.912752	0.198587	0.714165	2200.21	Bd1-1vsBd3-1	CG
Bd1	72166327	72166939	613	91	0.0969274	0.664518	-0.567591	-2199.25	Bd1-1vsBd3-1	CG
Bd1	27109022	27109796	775	60	0.236951	0.952458	-0.715508	-2198.55	Bd1-1vsBd3-1	CG
Bd1	58072828	58073435	608	72	0.7731	0.0891624	0.683937	2195.96	Bd1-1vsBd3-1	CG
Bd1	61733525	61734485	961	92	0.705817	0.108025	0.597792	2193.42	Bd1-1vsBd3-1	CG
Bd1	56107076	56108130	1055	73	0.0567041	0.796188	-0.739484	-2193.2	Bd1-1vsBd3-1	CG
Bd1	68460416	68461390	975	72	0.957164	0.23935	0.717814	2191.91	Bd1-1vsBd3-1	CG
Bd1	9670499	9671311	813	57	0.101747	0.913935	-0.812188	-2190	Bd1-1vsBd3-1	CG
Bd1	62322103	62322996	894	88	0.628775	0.0874222	0.541353	2186.99	Bd1-1vsBd3-1	CG
Bd1	11528304	11528870	567	86	0.536883	0.0386997	0.498183	2186.7	Bd1-1vsBd3-1	CG
Bd1	4824660	4827065	2406	289	0.515122	0.390276	0.124846	2184.23	Bd1-1vsBd3-1	CG
Bd1	63770695	63771647	953	107	0.806498	0.329315	0.477182	2180.01	Bd1-1vsBd3-1	CG
Bd1	49153591	49154211	621	51	0.943571	0.122463	0.821108	2178.64	Bd1-1vsBd3-1	CG
Bd1	60242617	60243470	854	66	0.930108	0.357329	0.572779	2175.77	Bd1-1vsBd3-1	CG
Bd1	55617878	55618258	381	50	0.85119	0.0595656	0.791625	2172.75	Bd1-1vsBd3-1	CG
Bd1	8557231	8557907	677	74	0.774049	0.175717	0.598332	2172.45	Bd1-1vsBd3-1	CG
Bd1	48656813	48657668	856	100	0.662146	0.0473504	0.614796	2165.14	Bd1-1vsBd3-1	CG
Bd1	8181471	8182005	535	62	0.747129	0.0640113	0.683117	2161.84	Bd1-1vsBd3-1	CG
Bd1	70561469	70562647	1179	82	0.75507	0.121	0.634069	2161.25	Bd1-1vsBd3-1	CG
Bd1	20897003	20897350	348	104	0.0565716	0.419414	-0.362843	-2160.78	Bd1-1vsBd3-1	CG
Bd1	48384255	48384921	667	80	0.0290327	0.537409	-0.508376	-2159.6	Bd1-1vsBd3-1	CG
Bd1	22644463	22645116	654	52	0.909012	0.193669	0.715344	2157.99	Bd1-1vsBd3-1	CG
Bd1	69148346	69149838	1493	275	0.728116	0.956813	-0.228697	-2157.76	Bd1-1vsBd3-1	CG
Bd1	43810442	43811191	750	76	0.268614	0.946168	-0.677554	-2157.1	Bd1-1vsBd3-1	CG
Bd1	50166521	50167369	849	78	0.204397	0.87183	-0.667433	-2156.33	Bd1-1vsBd3-1	CG
Bd1	783471	784139	669	80	0.311827	0.892088	-0.580261	-2151.82	Bd1-1vsBd3-1	CG
Bd1	27870119	27871168	1050	70	0.862541	0.218527	0.644013	2149.4	Bd1-1vsBd3-1	CG
Bd1	63281707	63283069	1363	102	0.373919	0.9161	-0.542181	-2144.33	Bd1-1vsBd3-1	CG
Bd1	64132434	64133179	746	56	0.189036	0.941475	-0.752438	-2141.12	Bd1-1vsBd3-1	CG
Bd1	25107212	25108739	1528	141	0.561347	0.919119	-0.357772	-2137.15	Bd1-1vsBd3-1	CG
Bd1	43064664	43066107	1444	63	0.125559	0.935146	-0.809588	-2135.76	Bd1-1vsBd3-1	CG
Bd1	4351425	4352309	885	108	0.673316	0.251801	0.421515	2128.37	Bd1-1vsBd3-1	CG
Bd1	46397754	46398846	1093	93	0.653461	0.144409	0.509052	2127.79	Bd1-1vsBd3-1	CG
Bd1	70981143	70981689	547	123	0.822995	0.443281	0.379714	2124.18	Bd1-1vsBd3-1	CG
Bd1	65033909	65034587	679	50	0.938593	0.162856	0.775737	2118.35	Bd1-1vsBd3-1	CG
Bd1	47606711	47607178	468	76	0.0262865	0.451753	-0.425467	-2117.14	Bd1-1vsBd3-1	CG
Bd1	34120726	34121466	741	54	0.0758188	0.856963	-0.781144	-2115.79	Bd1-1vsBd3-1	CG
Bd1	30296971	30298502	1532	96	0.839115	0.165357	0.673757	2113.42	Bd1-1vsBd3-1	CG
Bd1	63646656	63649437	2782	124	0.840697	0.250033	0.590665	2105.15	Bd1-1vsBd3-1	CG
Bd1	58176652	58177399	748	67	0.846541	0.156657	0.689884	2102.21	Bd1-1vsBd3-1	CG
Bd1	59796181	59796772	592	114	0.707534	0.1932	0.514334	2098.92	Bd1-1vsBd3-1	CG
Bd1	49962591	49963169	579	96	0.456518	0.0912618	0.365256	2093.44	Bd1-1vsBd3-1	CG
Bd1	38368747	38369395	649	63	0.366834	0.946325	-0.57949	-2091.04	Bd1-1vsBd3-1	CG
Bd1	47201430	47202266	837	96	0.384808	0.951161	-0.566353	-2087.66	Bd1-1vsBd3-1	CG
Bd1	57436357	57438440	2084	424	0.955191	0.608567	0.346624	2086.38	Bd1-1vsBd3-1	CG
Bd1	43637948	43638496	549	52	0.768981	0.13656	0.632421	2082.37	Bd1-1vsBd3-1	CG
Bd1	57767742	57769782	2041	387	0.960265	0.63771	0.322554	2081.79	Bd1-1vsBd3-1	CG
Bd1	8314823	8315666	844	101	0.951104	0.473286	0.477818	2080.78	Bd1-1vsBd3-1	CG
Bd1	25258870	25259455	586	88	0.124453	0.518593	-0.39414	-2077.02	Bd1-1vsBd3-1	CG
Bd1	51818078	51818904	827	80	0.578158	0.0416929	0.536465	2076.87	Bd1-1vsBd3-1	CG
Bd1	33837380	33838335	956	131	0.502378	0.864266	-0.361888	-2076	Bd1-1vsBd3-1	CG
Bd1	69574593	69575106	514	80	0.731773	0.12748	0.604293	2075.2	Bd1-1vsBd3-1	CG
Bd1	44966795	44967402	608	63	0.111823	0.844314	-0.732492	-2070.86	Bd1-1vsBd3-1	CG
Bd1	52025952	52026751	800	70	0.754479	0.0624834	0.691996	2066.02	Bd1-1vsBd3-1	CG
Bd1	54299345	54300156	812	88	0.708417	0.193198	0.515219	2065.85	Bd1-1vsBd3-1	CG
Bd1	68439291	68440370	1080	62	0.949632	0.253079	0.696553	2061.3	Bd1-1vsBd3-1	CG
Bd1	33105577	33106578	1002	100	0.654386	0.148721	0.505665	2060.95	Bd1-1vsBd3-1	CG
Bd1	68408587	68409879	1293	98	0.924592	0.343476	0.581116	2057.28	Bd1-1vsBd3-1	CG
Bd1	72890118	72890810	693	112	0.258038	0.67463	-0.416592	-2056.64	Bd1-1vsBd3-1	CG
Bd1	57499833	57500854	1022	130	0.868662	0.521558	0.347104	2055.92	Bd1-1vsBd3-1	CG
Bd1	73518160	73518646	487	45	0.203695	0.955195	-0.751499	-2053.61	Bd1-1vsBd3-1	CG
Bd1	39772769	39773472	704	60	0.915351	0.240023	0.675327	2052.07	Bd1-1vsBd3-1	CG
Bd1	19168023	19168811	789	74	0.289851	0.824631	-0.53478	-2051.26	Bd1-1vsBd3-1	CG
Bd1	65227174	65227907	734	64	0.7708	0.0743874	0.696413	2050.32	Bd1-1vsBd3-1	CG
Bd1	50564784	50565514	731	84	0.798788	0.224533	0.574255	2048.35	Bd1-1vsBd3-1	CG
Bd1	7553199	7553833	635	48	0.108202	0.914747	-0.806545	-2044.56	Bd1-1vsBd3-1	CG
Bd1	51811005	51811936	932	72	0.197369	0.824715	-0.627345	-2044.31	Bd1-1vsBd3-1	CG
Bd1	71174258	71175917	1660	89	0.0743197	0.683509	-0.60919	-2041.18	Bd1-1vsBd3-1	CG
Bd1	2731162	2731985	824	62	0.864473	0.183878	0.680595	2039.75	Bd1-1vsBd3-1	CG
Bd1	28688414	28689208	795	58	0.056735	0.777659	-0.720924	-2036.73	Bd1-1vsBd3-1	CG
Bd1	42240800	42241657	858	72	0.123389	0.778247	-0.654858	-2032.71	Bd1-1vsBd3-1	CG
Bd1	54377346	54378306	961	104	0.495195	0.953383	-0.458187	-2026	Bd1-1vsBd3-1	CG
Bd1	16637285	16637903	619	86	0.963713	0.523386	0.440327	2019.68	Bd1-1vsBd3-1	CG
Bd1	9563249	9563872	624	81	0.600631	0.0487377	0.551894	2017.28	Bd1-1vsBd3-1	CG
Bd1	60784388	60785072	685	83	0.921585	0.377807	0.543778	2016.94	Bd1-1vsBd3-1	CG
Bd1	66214592	66215335	744	66	0.234948	0.885549	-0.650602	-2014.56	Bd1-1vsBd3-1	CG
Bd1	38348608	38350837	2230	386	0.690218	0.959161	-0.268943	-2013.02	Bd1-1vsBd3-1	CG
Bd1	47783336	47784802	1467	102	0.886065	0.319689	0.566376	2011.78	Bd1-1vsBd3-1	CG
Bd1	43380886	43381439	554	52	0.194686	0.935101	-0.740414	-2010.38	Bd1-1vsBd3-1	CG
Bd1	21172319	21173186	868	52	0.0464887	0.825288	-0.778799	-2009.73	Bd1-1vsBd3-1	CG
Bd1	20692331	20693629	1299	101	0.086283	0.687931	-0.601648	-2008.86	Bd1-1vsBd3-1	CG
Bd1	19658438	19659077	640	71	0.107494	0.772625	-0.665131	-2006.07	Bd1-1vsBd3-1	CG
Bd1	27464173	27466682	2510	96	0.894281	0.185257	0.709024	2003.31	Bd1-1vsBd3-1	CG
Bd1	56447824	56448621	798	57	0.0980151	0.849961	-0.751946	-1996.52	Bd1-1vsBd3-1	CG
Bd1	20719017	20720700	1684	302	0.687358	0.946879	-0.259521	-1996.23	Bd1-1vsBd3-1	CG
Bd1	24323534	24324269	736	80	0.872238	0.349064	0.523173	1993.5	Bd1-1vsBd3-1	CG
Bd1	61379331	61380454	1124	70	0.887641	0.24336	0.644282	1991.57	Bd1-1vsBd3-1	CG
Bd1	10130432	10131445	1014	244	0.7389	0.959527	-0.220628	-1990.59	Bd1-1vsBd3-1	CG
Bd1	1094302	1094978	677	126	0.745913	0.0428209	0.703093	1989.94	Bd1-1vsBd3-1	CG
Bd1	49216728	49217943	1216	89	0.85163	0.162407	0.689222	1987.33	Bd1-1vsBd3-1	CG
Bd1	1945206	1945632	427	69	0.0349979	0.600913	-0.565916	-1983.89	Bd1-1vsBd3-1	CG
Bd1	48331618	48332230	613	44	0.916368	0.14938	0.766988	1980.35	Bd1-1vsBd3-1	CG
Bd1	7317559	7318343	785	60	0.727676	0.0717433	0.655933	1980.01	Bd1-1vsBd3-1	CG
Bd1	41568334	41569711	1378	322	0.695307	0.950102	-0.254795	-1977.12	Bd1-1vsBd3-1	CG
Bd1	48875107	48875695	589	78	0.614689	0.0342496	0.580439	1969.92	Bd1-1vsBd3-1	CG
Bd1	48415290	48416474	1185	124	0.903682	0.276135	0.627547	1968.72	Bd1-1vsBd3-1	CG
Bd1	59336659	59338122	1464	106	0.334194	0.848977	-0.514784	-1962.97	Bd1-1vsBd3-1	CG
Bd1	43825526	43826709	1184	64	0.89868	0.160243	0.738437	1961.43	Bd1-1vsBd3-1	CG
Bd1	61860298	61861207	910	68	0.285326	0.891845	-0.606519	-1957.04	Bd1-1vsBd3-1	CG
Bd1	27261102	27262857	1756	67	0.0676234	0.828791	-0.761167	-1956.24	Bd1-1vsBd3-1	CG
Bd1	30330574	30331623	1050	86	0.952938	0.348575	0.604363	1943.01	Bd1-1vsBd3-1	CG
Bd1	47310208	47311020	813	194	0.765276	0.955881	-0.190605	-1942.97	Bd1-1vsBd3-1	CG
Bd1	6123868	6124508	641	83	0.11559	0.713307	-0.597717	-1938.18	Bd1-1vsBd3-1	CG
Bd1	73775353	73776622	1270	148	0.656367	0.346616	0.309751	1935.41	Bd1-1vsBd3-1	CG
Bd1	8986337	8987593	1257	64	0.954946	0.21948	0.735467	1928.75	Bd1-1vsBd3-1	CG
Bd1	56207069	56208566	1498	90	0.265495	0.944961	-0.679466	-1927.97	Bd1-1vsBd3-1	CG
Bd1	12976953	12977558	606	54	0.860413	0.169387	0.691026	1927.54	Bd1-1vsBd3-1	CG
Bd1	26076604	26077269	666	65	0.949039	0.363014	0.586025	1927.44	Bd1-1vsBd3-1	CG
Bd1	29260001	29261750	1750	338	0.700952	0.957525	-0.256573	-1926.55	Bd1-1vsBd3-1	CG
Bd1	10726990	10731699	4710	123	0.885064	0.129221	0.755843	1925.91	Bd1-1vsBd3-1	CG
Bd1	36070557	36072675	2119	345	0.705845	0.954133	-0.248288	-1925.4	Bd1-1vsBd3-1	CG
Bd1	8528950	8530868	1919	130	0.319524	0.474348	-0.154824	-1920.97	Bd1-1vsBd3-1	CG
Bd1	18770234	18771352	1119	85	0.964288	0.424082	0.540206	1920.64	Bd1-1vsBd3-1	CG
Bd1	6373379	6374921	1543	254	0.665739	0.952862	-0.287123	-1917.63	Bd1-1vsBd3-1	CG
Bd1	74415697	74416895	1199	126	0.204425	0.559639	-0.355214	-1912.51	Bd1-1vsBd3-1	CG
Bd1	53236787	53237250	464	51	0.863026	0.0561538	0.806872	1912.24	Bd1-1vsBd3-1	CG
Bd1	72342964	72343640	677	106	0.502046	0.0909286	0.411117	1910.35	Bd1-1vsBd3-1	CG
Bd1	47643065	47644289	1225	94	0.0840886	0.547472	-0.463383	-1905.43	Bd1-1vsBd3-1	CG
Bd1	61734720	61735729	1010	120	0.227924	0.625904	-0.39798	-1903.31	Bd1-1vsBd3-1	CG
Bd1	37262940	37263989	1050	288	0.746583	0.953371	-0.206788	-1903.27	Bd1-1vsBd3-1	CG
Bd1	25359341	25359917	577	38	0.0435275	0.860399	-0.816871	-1901.09	Bd1-1vsBd3-1	CG
Bd1	34287502	34288086	585	72	0.648406	0.109957	0.538449	1900.28	Bd1-1vsBd3-1	CG
Bd1	24212232	24212954	723	58	0.784275	0.129378	0.654897	1898.15	Bd1-1vsBd3-1	CG
Bd1	18164090	18164641	552	50	0.100218	0.804907	-0.704689	-1897.41	Bd1-1vsBd3-1	CG
Bd1	28337185	28337970	786	54	0.741971	0.0532997	0.688671	1894.39	Bd1-1vsBd3-1	CG
Bd1	20046359	20047190	832	129	0.102815	0.334148	-0.231333	-1892.96	Bd1-1vsBd3-1	CG
Bd1	6055702	6056291	590	108	0.356443	0.105656	0.250787	1889.74	Bd1-1vsBd3-1	CG
Bd1	63073676	63074502	827	76	0.701473	0.0691632	0.63231	1888.84	Bd1-1vsBd3-1	CG
Bd1	14282424	14283196	773	78	0.942587	0.42566	0.516927	1888.27	Bd1-1vsBd3-1	CG
Bd1	33451844	33452454	611	86	0.423507	0.85355	-0.430042	-1888.2	Bd1-1vsBd3-1	CG
Bd1	61175771	61176451	681	59	0.760322	0.0533719	0.70695	1887.33	Bd1-1vsBd3-1	CG
Bd1	68771750	68772550	801	87	0.947305	0.461396	0.485909	1883.21	Bd1-1vsBd3-1	CG
Bd1	41562874	41564695	1822	287	0.717729	0.951046	-0.233317	-1880.56	Bd1-1vsBd3-1	CG
Bd1	70289059	70289963	905	83	0.296829	0.940768	-0.643939	-1874.94	Bd1-1vsBd3-1	CG
Bd1	41972811	41973696	886	219	0.772967	0.958175	-0.185208	-1862.48	Bd1-1vsBd3-1	CG
Bd1	40316995	40317847	853	130	0.771499	0.355863	0.415636	1857.62	Bd1-1vsBd3-1	CG
Bd1	37662136	37663312	1177	83	0.147946	0.8708	-0.722854	-1855.46	Bd1-1vsBd3-1	CG
Bd1	13554560	13555260	701	76	0.648495	0.15909	0.489405	1854.81	Bd1-1vsBd3-1	CG
Bd1	48205788	48206788	1001	68	0.0929122	0.787095	-0.694183	-1851.9	Bd1-1vsBd3-1	CG
Bd1	60902033	60902910	878	56	0.920432	0.200023	0.720409	1849.43	Bd1-1vsBd3-1	CG
Bd1	29960046	29961697	1652	87	0.911115	0.352109	0.559007	1847.46	Bd1-1vsBd3-1	CG
Bd1	37664657	37665464	808	70	0.258556	0.909143	-0.650587	-1847.23	Bd1-1vsBd3-1	CG
Bd1	3530288	3531853	1566	273	0.727261	0.951211	-0.22395	-1845.26	Bd1-1vsBd3-1	CG
Bd1	33077068	33077554	487	44	0.911095	0.131204	0.779891	1844.84	Bd1-1vsBd3-1	CG
Bd1	15399556	15400095	540	118	0.264304	0.521708	-0.257404	-1843.87	Bd1-1vsBd3-1	CG
Bd1	38250405	38251433	1029	56	0.88204	0.131058	0.750983	1840.58	Bd1-1vsBd3-1	CG
Bd1	5159907	5161869	1963	90	0.879349	0.149624	0.729726	1835.46	Bd1-1vsBd3-1	CG
Bd1	74699918	74701649	1732	102	0.597072	0.0921754	0.504897	1832.39	Bd1-1vsBd3-1	CG
Bd1	41557740	41558884	1145	268	0.736638	0.952689	-0.216051	-1832.04	Bd1-1vsBd3-1	CG
Bd1	73635019	73635899	881	81	0.792139	0.216789	0.57535	1823.67	Bd1-1vsBd3-1	CG
Bd1	34811069	34811961	893	249	0.725832	0.950248	-0.224417	-1823.52	Bd1-1vsBd3-1	CG
Bd1	21210568	21211192	625	71	0.0503093	0.611437	-0.561128	-1818.93	Bd1-1vsBd3-1	CG
Bd1	49943757	49944403	647	73	0.587506	0.060316	0.52719	1814.78	Bd1-1vsBd3-1	CG
Bd1	6590737	6591353	617	97	0.789721	0.477061	0.31266	1814.62	Bd1-1vsBd3-1	CG
Bd1	17288146	17288810	665	96	0.71701	0.303205	0.413806	1812.17	Bd1-1vsBd3-1	CG
Bd1	14546966	14547649	684	116	0.165434	0.397413	-0.231979	-1809.04	Bd1-1vsBd3-1	CG
Bd1	6371479	6372853	1375	248	0.748168	0.959688	-0.21152	-1808.78	Bd1-1vsBd3-1	CG
Bd1	42472887	42473559	673	98	0.519682	0.870699	-0.351017	-1806.93	Bd1-1vsBd3-1	CG
Bd1	72073320	72074076	757	48	0.827085	0.0926932	0.734392	1805.92	Bd1-1vsBd3-1	CG
Bd1	48160145	48160697	553	38	0.929416	0.103386	0.82603	1804.77	Bd1-1vsBd3-1	CG
Bd1	1333094	1333822	729	119	0.24291	0.627083	-0.384173	-1803.91	Bd1-1vsBd3-1	CG
Bd1	41572732	41573254	523	58	0.935226	0.221414	0.713813	1800.43	Bd1-1vsBd3-1	CG
Bd1	74750974	74751522	549	66	0.956059	0.331134	0.624924	1798.73	Bd1-1vsBd3-1	CG
Bd1	4069498	4070217	720	48	0.733679	0.0396088	0.69407	1797.59	Bd1-1vsBd3-1	CG
Bd1	36758863	36760551	1689	313	0.715857	0.948606	-0.232749	-1796.67	Bd1-1vsBd3-1	CG
Bd1	56567517	56568293	777	74	0.0767317	0.620105	-0.543373	-1789.91	Bd1-1vsBd3-1	CG
Bd1	45179406	45180083	678	98	0.401516	0.871485	-0.469969	-1788.96	Bd1-1vsBd3-1	CG
Bd1	61748539	61749174	636	86	0.241972	0.821112	-0.57914	-1787.58	Bd1-1vsBd3-1	CG
Bd1	41058168	41058708	541	39	0.0578179	0.929179	-0.871362	-1785.02	Bd1-1vsBd3-1	CG
Bd1	69968667	69969599	933	82	0.199347	0.778122	-0.578774	-1780.64	Bd1-1vsBd3-1	CG
Bd1	70732521	70733156	636	64	0.241419	0.844223	-0.602804	-1779.36	Bd1-1vsBd3-1	CG
Bd1	54754900	54755280	381	62	0.119159	0.586298	-0.467139	-1777.46	Bd1-1vsBd3-1	CG
Bd1	28383111	28384397	1287	94	0.704275	0.121253	0.583021	1771.59	Bd1-1vsBd3-1	CG
Bd1	1013619	1014512	894	50	0.119197	0.946747	-0.82755	-1770.22	Bd1-1vsBd3-1	CG
Bd1	65214099	65214698	600	66	0.945073	0.337547	0.607526	1769.8	Bd1-1vsBd3-1	CG
Bd1	71001710	71003286	1577	362	0.941003	0.620966	0.320037	1760.47	Bd1-1vsBd3-1	CG
Bd1	51069382	51070134	753	72	0.760717	0.212323	0.548394	1758.48	Bd1-1vsBd3-1	CG
Bd1	54340237	54340798	562	134	0.226866	0.0425397	0.184326	1754.7	Bd1-1vsBd3-1	CG
Bd1	31374911	31375888	978	85	0.359317	0.844176	-0.484859	-1754	Bd1-1vsBd3-1	CG
Bd1	41260689	41261608	920	94	0.33513	0.93898	-0.60385	-1753.45	Bd1-1vsBd3-1	CG
Bd1	27372376	27373539	1164	76	0.329264	0.949749	-0.620484	-1750.74	Bd1-1vsBd3-1	CG
Bd1	42819650	42820291	642	33	0.045428	0.898758	-0.85333	-1750.47	Bd1-1vsBd3-1	CG
Bd1	70855220	70855939	720	74	0.114468	0.79433	-0.679862	-1749.73	Bd1-1vsBd3-1	CG
Bd1	21727109	21727694	586	104	0.0325785	0.263419	-0.230841	-1747.9	Bd1-1vsBd3-1	CG
Bd1	528816	529361	546	125	0.052736	0.250388	-0.197652	-1739.3	Bd1-1vsBd3-1	CG
Bd1	4715645	4716871	1227	207	0.903488	0.516481	0.387007	1739.06	Bd1-1vsBd3-1	CG
Bd1	57665266	57666469	1204	86	0.548709	0.0844127	0.464296	1739.04	Bd1-1vsBd3-1	CG
Bd1	7222090	7222941	852	94	0.699005	0.282718	0.416287	1738.81	Bd1-1vsBd3-1	CG
Bd1	20856034	20856590	557	78	0.831874	0.128576	0.703298	1738.81	Bd1-1vsBd3-1	CG
Bd1	58441898	58442467	570	140	0.33017	0.536766	-0.206595	-1738.34	Bd1-1vsBd3-1	CG
Bd1	30482468	30483234	767	78	0.111301	0.645405	-0.534104	-1738.1	Bd1-1vsBd3-1	CG
Bd1	9236250	9236989	740	56	0.872557	0.248648	0.623909	1736.2	Bd1-1vsBd3-1	CG
Bd1	38058034	38059171	1138	62	0.89878	0.18485	0.71393	1736.19	Bd1-1vsBd3-1	CG
Bd1	17714562	17715638	1077	82	0.0318615	0.485045	-0.453183	-1733.65	Bd1-1vsBd3-1	CG
Bd1	55246653	55247099	447	42	0.914566	0.0720072	0.842559	1731.53	Bd1-1vsBd3-1	CG
Bd1	57703616	57704470	855	238	0.956584	0.732591	0.223992	1729.33	Bd1-1vsBd3-1	CG
Bd1	22813222	22813920	699	96	0.912639	0.610622	0.302016	1727.8	Bd1-1vsBd3-1	CG
Bd1	31049612	31050838	1227	268	0.958284	0.705483	0.252801	1727.54	Bd1-1vsBd3-1	CG
Bd1	28651793	28652555	763	88	0.0316497	0.559823	-0.528173	-1726.04	Bd1-1vsBd3-1	CG
Bd1	69617763	69618229	467	92	0.478509	0.224489	0.254019	1724.5	Bd1-1vsBd3-1	CG
Bd1	42524475	42525370	896	68	0.374769	0.950147	-0.575378	-1721.66	Bd1-1vsBd3-1	CG
Bd1	10162782	10163377	596	76	0.613992	0.151959	0.462033	1720.14	Bd1-1vsBd3-1	CG
Bd1	27898168	27900480	2313	100	0.791087	0.123529	0.667558	1716.99	Bd1-1vsBd3-1	CG
Bd1	48515147	48516366	1220	68	0.795722	0.0810885	0.714634	1716.61	Bd1-1vsBd3-1	CG
Bd1	60273981	60275803	1823	84	0.750292	0.101801	0.648491	1713.44	Bd1-1vsBd3-1	CG
Bd1	21970146	21970927	782	63	0.839789	0.146421	0.693369	1711.73	Bd1-1vsBd3-1	CG
Bd1	15442634	15443284	651	72	0.903116	0.370554	0.532561	1707.36	Bd1-1vsBd3-1	CG
Bd1	53186831	53187635	805	86	0.534322	0.0622367	0.472085	1705.22	Bd1-1vsBd3-1	CG
Bd1	51530127	51530866	740	104	0.586507	0.933688	-0.347182	-1703.33	Bd1-1vsBd3-1	CG
Bd1	4653489	4655432	1944	79	0.898765	0.142715	0.756051	1701.65	Bd1-1vsBd3-1	CG
Bd1	24880642	24881983	1342	109	0.704821	0.25371	0.451111	1701.63	Bd1-1vsBd3-1	CG
Bd1	62631991	62632616	626	48	0.975122	0.162389	0.812734	1701.2	Bd1-1vsBd3-1	CG
Bd1	12121596	12122148	553	107	0.699315	0.9132	-0.213884	-1700.78	Bd1-1vsBd3-1	CG
Bd1	25320093	25320427	335	88	0.327835	0.739452	-0.411616	-1699.99	Bd1-1vsBd3-1	CG
Bd1	44893276	44894356	1081	72	0.233034	0.886492	-0.653458	-1699.62	Bd1-1vsBd3-1	CG
Bd1	789520	790011	492	52	0.855565	0.0870411	0.768523	1699.07	Bd1-1vsBd3-1	CG
Bd1	45305414	45306021	608	46	0.28926	0.946493	-0.657233	-1698.74	Bd1-1vsBd3-1	CG
Bd1	8781382	8781970	589	49	0.823554	0.0556064	0.767947	1697.8	Bd1-1vsBd3-1	CG
Bd1	3419453	3419936	484	100	0.357006	0.67665	-0.319643	-1697.73	Bd1-1vsBd3-1	CG
Bd1	71583812	71584695	884	68	0.385483	0.950471	-0.564988	-1696.44	Bd1-1vsBd3-1	CG
Bd1	72148345	72149242	898	66	0.77151	0.150393	0.621117	1696.25	Bd1-1vsBd3-1	CG
Bd1	47021690	47022951	1262	120	0.85961	0.47135	0.38826	1693.56	Bd1-1vsBd3-1	CG
Bd1	69155777	69156779	1003	236	0.768396	0.961542	-0.193146	-1692.15	Bd1-1vsBd3-1	CG
Bd1	20388965	20389838	874	74	0.648559	0.116491	0.532067	1691.77	Bd1-1vsBd3-1	CG
Bd1	35359309	35359970	662	172	0.774315	0.95113	-0.176815	-1690.71	Bd1-1vsBd3-1	CG
Bd1	21898211	21898791	581	50	0.886032	0.0922528	0.793779	1690.18	Bd1-1vsBd3-1	CG
Bd1	28591822	28592569	748	86	0.963961	0.397093	0.566868	1688.64	Bd1-1vsBd3-1	CG
Bd1	42578272	42578999	728	182	0.789825	0.958784	-0.168959	-1688.13	Bd1-1vsBd3-1	CG
Bd1	59619015	59619572	558	58	0.0370074	0.607371	-0.570364	-1685.56	Bd1-1vsBd3-1	CG
Bd1	67320144	67321875	1732	98	0.289239	0.781923	-0.492684	-1683.38	Bd1-1vsBd3-1	CG
Bd1	56228025	56228902	878	62	0.0740535	0.766053	-0.692	-1682.88	Bd1-1vsBd3-1	CG
Bd1	67558043	67558570	528	46	0.205811	0.938	-0.732189	-1681.33	Bd1-1vsBd3-1	CG
Bd1	21406758	21407358	601	67	0.837015	0.130021	0.706994	1680.88	Bd1-1vsBd3-1	CG
Bd1	57720650	57722404	1755	292	0.961999	0.702133	0.259867	1680.59	Bd1-1vsBd3-1	CG
Bd1	58390752	58391478	727	70	0.83986	0.252679	0.587182	1676.85	Bd1-1vsBd3-1	CG
Bd1	38029679	38031054	1376	115	0.248738	0.934496	-0.685758	-1673.06	Bd1-1vsBd3-1	CG
Bd1	53946821	53947522	702	58	0.963383	0.293559	0.669824	1672.51	Bd1-1vsBd3-1	CG
Bd1	42032346	42033474	1129	255	0.704631	0.952131	-0.2475	-1671.53	Bd1-1vsBd3-1	CG
Bd1	55092455	55093137	683	64	0.956958	0.303141	0.653817	1663.61	Bd1-1vsBd3-1	CG
Bd1	53494214	53494980	767	44	0.828127	0.0525624	0.775565	1663.48	Bd1-1vsBd3-1	CG
Bd1	1272818	1273327	510	134	0.426029	0.115079	0.31095	1659.48	Bd1-1vsBd3-1	CG
Bd1	71577404	71578357	954	72	0.595023	0.0360034	0.55902	1659.07	Bd1-1vsBd3-1	CG
Bd1	33757577	33758871	1295	76	0.924888	0.185694	0.739194	1652.26	Bd1-1vsBd3-1	CG
Bd1	43964967	43965909	943	70	0.382164	0.96114	-0.578976	-1651.52	Bd1-1vsBd3-1	CG
Bd1	48531906	48532868	963	224	0.72819	0.95708	-0.22889	-1650.83	Bd1-1vsBd3-1	CG
Bd1	36063503	36064691	1189	238	0.769182	0.956884	-0.187702	-1648.33	Bd1-1vsBd3-1	CG
Bd1	25969056	25970005	950	62	0.969697	0.333379	0.636319	1648.32	Bd1-1vsBd3-1	CG
Bd1	71324064	71325640	1577	104	0.310663	0.810901	-0.500238	-1648.06	Bd1-1vsBd3-1	CG
Bd1	4469870	4470373	504	84	0.458428	0.104716	0.353712	1646.71	Bd1-1vsBd3-1	CG
Bd1	2896716	2897286	571	56	0.227406	0.850622	-0.623216	-1644.52	Bd1-1vsBd3-1	CG
Bd1	12434484	12435219	736	109	0.483776	0.921295	-0.437519	-1639.05	Bd1-1vsBd3-1	CG
Bd1	32948937	32950116	1180	89	0.364128	0.893409	-0.529282	-1636.99	Bd1-1vsBd3-1	CG
Bd1	26281210	26281809	600	70	0.341887	0.930982	-0.589095	-1635.66	Bd1-1vsBd3-1	CG
Bd1	29974285	29975066	782	84	0.476895	0.0851904	0.391705	1633.33	Bd1-1vsBd3-1	CG
Bd1	235909	237826	1918	66	0.814538	0.127909	0.68663	1632.95	Bd1-1vsBd3-1	CG
Bd1	61078588	61079883	1296	78	0.252764	0.891568	-0.638804	-1631.51	Bd1-1vsBd3-1	CG
Bd1	16528432	16529026	595	56	0.213219	0.767003	-0.553784	-1630.76	Bd1-1vsBd3-1	CG
Bd1	54497232	54498367	1136	50	0.920431	0.146945	0.773486	1629.87	Bd1-1vsBd3-1	CG
Bd1	47102702	47103277	576	76	0.723862	0.212876	0.510986	1627.96	Bd1-1vsBd3-1	CG
Bd1	8300775	8301289	515	94	0.649993	0.946373	-0.29638	-1627.93	Bd1-1vsBd3-1	CG
Bd1	20193620	20194270	651	78	0.276261	0.77489	-0.498628	-1626.72	Bd1-1vsBd3-1	CG
Bd1	2805912	2807144	1233	80	0.0972811	0.748832	-0.65155	-1624.62	Bd1-1vsBd3-1	CG
Bd1	27084634	27085421	788	94	0.697367	0.194043	0.503324	1623.52	Bd1-1vsBd3-1	CG
Bd1	44229441	44229988	548	74	0.588198	0.104877	0.48332	1622.72	Bd1-1vsBd3-1	CG
Bd1	14676602	14677396	795	45	0.920365	0.162162	0.758203	1613.3	Bd1-1vsBd3-1	CG
Bd1	4822427	4823032	606	62	0.254717	0.892855	-0.638137	-1610.65	Bd1-1vsBd3-1	CG
Bd1	53135018	53136920	1903	102	0.285322	0.863181	-0.577859	-1609.98	Bd1-1vsBd3-1	CG
Bd1	45946516	45947314	799	202	0.95475	0.772457	0.182294	1607.66	Bd1-1vsBd3-1	CG
Bd1	73181826	73182471	646	72	0.616225	0.0680885	0.548136	1600	Bd1-1vsBd3-1	CG
Bd1	8596706	8597171	466	97	0.222	0.898753	-0.676752	-1598.23	Bd1-1vsBd3-1	CG
Bd1	15805867	15806338	472	96	0.860517	0.527703	0.332814	1596.77	Bd1-1vsBd3-1	CG
Bd1	9329873	9330598	726	46	0.213411	0.904661	-0.69125	-1594.23	Bd1-1vsBd3-1	CG
Bd1	19938435	19939099	665	49	0.100261	0.90101	-0.80075	-1592.82	Bd1-1vsBd3-1	CG
Bd1	67181331	67182540	1210	80	0.325658	0.82351	-0.497853	-1590.56	Bd1-1vsBd3-1	CG
Bd1	47389129	47390339	1211	99	0.919726	0.529541	0.390185	1589.82	Bd1-1vsBd3-1	CG
Bd1	1188651	1189688	1038	88	0.795228	0.328525	0.466703	1588.52	Bd1-1vsBd3-1	CG
Bd1	23862668	23863659	992	66	0.167634	0.688967	-0.521333	-1588.1	Bd1-1vsBd3-1	CG
Bd1	66307798	66308364	567	62	0.866291	0.315735	0.550555	1587.11	Bd1-1vsBd3-1	CG
Bd1	26631750	26632435	686	108	0.425031	0.770201	-0.34517	-1586	Bd1-1vsBd3-1	CG
Bd1	22591101	22592190	1090	203	0.755542	0.950768	-0.195226	-1584.83	Bd1-1vsBd3-1	CG
Bd1	41036611	41039404	2794	150	0.879509	0.497077	0.382431	1583.4	Bd1-1vsBd3-1	CG
Bd1	26288574	26289277	704	76	0.108862	0.605408	-0.496546	-1583.36	Bd1-1vsBd3-1	CG
Bd1	74251416	74251913	498	68	0.598972	0.0470794	0.551893	1582.03	Bd1-1vsBd3-1	CG
Bd1	53568029	53568573	545	81	0.383256	0.857441	-0.474186	-1580.81	Bd1-1vsBd3-1	CG
Bd1	38078151	38078696	546	56	0.765472	0.153086	0.612385	1577.1	Bd1-1vsBd3-1	CG
Bd1	57163606	57164871	1266	162	0.891864	0.372962	0.518902	1576.32	Bd1-1vsBd3-1	CG
Bd1	51382029	51383026	998	79	0.316572	0.942893	-0.626321	-1571.05	Bd1-1vsBd3-1	CG
Bd1	9426745	9429299	2555	85	0.804609	0.108447	0.696162	1570.28	Bd1-1vsBd3-1	CG
Bd1	16138564	16139305	742	116	0.295694	0.0416249	0.254069	1568.01	Bd1-1vsBd3-1	CG
Bd1	19102636	19103542	907	102	0.615663	0.28525	0.330413	1567.96	Bd1-1vsBd3-1	CG
Bd1	66087806	66088180	375	27	0.104275	0.943213	-0.838938	-1567.07	Bd1-1vsBd3-1	CG
Bd1	70230588	70232226	1639	93	0.206379	0.71516	-0.508781	-1565.47	Bd1-1vsBd3-1	CG
Bd1	59861762	59862604	843	60	0.756361	0.142681	0.613681	1565.14	Bd1-1vsBd3-1	CG
Bd1	69116726	69118268	1543	63	0.166384	0.890657	-0.724273	-1562.63	Bd1-1vsBd3-1	CG
Bd1	43163513	43164416	904	219	0.732303	0.942018	-0.209715	-1560.8	Bd1-1vsBd3-1	CG
Bd1	47136940	47137388	449	46	0.0973604	0.678768	-0.581408	-1559.83	Bd1-1vsBd3-1	CG
Bd1	27461513	27462204	692	84	0.401124	0.0407086	0.360415	1558.97	Bd1-1vsBd3-1	CG
Bd1	54808799	54809346	548	37	0.0796219	0.848872	-0.76925	-1554.93	Bd1-1vsBd3-1	CG
Bd1	57844362	57845802	1441	254	0.963605	0.659278	0.304328	1554.33	Bd1-1vsBd3-1	CG
Bd1	13339961	13340560	600	58	0.649658	0.0723024	0.577355	1546.13	Bd1-1vsBd3-1	CG
Bd1	4588791	4589346	556	101	0.395717	0.685004	-0.289288	-1542.07	Bd1-1vsBd3-1	CG
Bd1	64066213	64067659	1447	59	0.110821	0.893904	-0.783083	-1539.06	Bd1-1vsBd3-1	CG
Bd1	9086625	9087309	685	38	0.861639	0.0535772	0.808062	1535.91	Bd1-1vsBd3-1	CG
Bd1	9643705	9644337	633	69	0.886121	0.278889	0.607232	1535.8	Bd1-1vsBd3-1	CG
Bd1	1649810	1650513	704	50	0.873746	0.147357	0.726389	1535.11	Bd1-1vsBd3-1	CG
Bd1	20421281	20421955	675	54	0.723321	0.0963216	0.627	1534.5	Bd1-1vsBd3-1	CG
Bd1	26140311	26141210	900	86	0.487754	0.0438345	0.443919	1534.15	Bd1-1vsBd3-1	CG
Bd1	32944726	32945337	612	38	0.13824	0.932433	-0.794193	-1532.33	Bd1-1vsBd3-1	CG
Bd1	60781673	60782262	590	60	0.60524	0.0557436	0.549496	1531.9	Bd1-1vsBd3-1	CG
Bd1	16568118	16569780	1663	268	0.688859	0.94746	-0.2586	-1529.08	Bd1-1vsBd3-1	CG
Bd1	29325370	29326043	674	50	0.789231	0.075207	0.714024	1521.9	Bd1-1vsBd3-1	CG
Bd1	56924592	56925278	687	52	0.044759	0.629372	-0.584613	-1521.74	Bd1-1vsBd3-1	CG
Bd1	53853360	53854058	699	86	0.420408	0.860046	-0.439638	-1520.52	Bd1-1vsBd3-1	CG
Bd1	40738277	40739239	963	155	0.53143	0.950045	-0.418615	-1516.43	Bd1-1vsBd3-1	CG
Bd1	53593948	53595195	1248	68	0.95664	0.315808	0.640832	1512.03	Bd1-1vsBd3-1	CG
Bd1	29038990	29039680	691	78	0.188296	0.780162	-0.591867	-1508.89	Bd1-1vsBd3-1	CG
Bd1	7792168	7792662	495	84	0.888617	0.576882	0.311735	1508.55	Bd1-1vsBd3-1	CG
Bd1	35345995	35347136	1142	273	0.693325	0.943177	-0.249852	-1507.26	Bd1-1vsBd3-1	CG
Bd1	21664146	21664588	443	74	0.601211	0.294469	0.306742	1506.02	Bd1-1vsBd3-1	CG
Bd1	9423775	9426408	2634	113	0.831424	0.246729	0.584695	1504.56	Bd1-1vsBd3-1	CG
Bd1	40302045	40304151	2107	322	0.960497	0.66123	0.299267	1503.11	Bd1-1vsBd3-1	CG
Bd1	23364805	23366053	1249	102	0.874116	0.335088	0.539028	1497.16	Bd1-1vsBd3-1	CG
Bd1	1257974	1258671	698	139	0.403262	0.610134	-0.206872	-1495.37	Bd1-1vsBd3-1	CG
Bd1	25819143	25820437	1295	94	0.790916	0.28777	0.503146	1495.21	Bd1-1vsBd3-1	CG
Bd1	1417662	1419213	1552	72	0.212014	0.714153	-0.502139	-1494.07	Bd1-1vsBd3-1	CG
Bd1	48478188	48478838	651	76	0.613085	0.112836	0.500249	1493.05	Bd1-1vsBd3-1	CG
Bd1	43096625	43097271	647	88	0.85669	0.463745	0.392946	1491.83	Bd1-1vsBd3-1	CG
Bd1	26358239	26359127	889	95	0.403154	0.750745	-0.347592	-1490.87	Bd1-1vsBd3-1	CG
Bd1	62543031	62543707	677	50	0.244376	0.919369	-0.674993	-1490.55	Bd1-1vsBd3-1	CG
Bd1	27844057	27845257	1201	58	0.874852	0.132266	0.742586	1485.41	Bd1-1vsBd3-1	CG
Bd1	45079556	45080613	1058	78	0.901072	0.444488	0.456584	1484.7	Bd1-1vsBd3-1	CG
Bd1	7513208	7513871	664	80	0.0561145	0.362844	-0.30673	-1484.14	Bd1-1vsBd3-1	CG
Bd1	37301708	37302642	935	233	0.610339	0.95008	-0.339741	-1483.79	Bd1-1vsBd3-1	CG
Bd1	46641173	46641773	601	68	0.534676	0.953886	-0.41921	-1483.35	Bd1-1vsBd3-1	CG
Bd1	26885343	26885806	464	104	0.0324565	0.195719	-0.163263	-1482.92	Bd1-1vsBd3-1	CG
Bd1	57326577	57327051	475	70	0.0583006	0.38691	-0.328609	-1482.66	Bd1-1vsBd3-1	CG
Bd1	24589428	24590108	681	78	0.230408	0.794834	-0.564427	-1481.31	Bd1-1vsBd3-1	CG
Bd1	70987992	70989375	1384	299	0.93803	0.6447	0.29333	1479.69	Bd1-1vsBd3-1	CG
Bd1	53637528	53638306	779	58	0.945199	0.324984	0.620215	1479.15	Bd1-1vsBd3-1	CG
Bd1	7175147	7176353	1207	77	0.561915	0.0957778	0.466137	1476.67	Bd1-1vsBd3-1	CG
Bd1	48723733	48725054	1322	173	0.544568	0.128496	0.416072	1475.81	Bd1-1vsBd3-1	CG
Bd1	35389584	35390385	802	239	0.646612	0.946616	-0.300004	-1475.71	Bd1-1vsBd3-1	CG
Bd1	51957333	51958110	778	56	0.147006	0.855248	-0.708242	-1475.06	Bd1-1vsBd3-1	CG
Bd1	70443251	70444103	853	47	0.937841	0.132442	0.805399	1470.7	Bd1-1vsBd3-1	CG
Bd1	13506749	13507254	506	48	0.111897	0.747339	-0.635442	-1469.42	Bd1-1vsBd3-1	CG
Bd1	56541015	56541624	610	40	0.11257	0.910868	-0.798298	-1468.82	Bd1-1vsBd3-1	CG
Bd1	31642561	31643115	555	58	0.211319	0.793692	-0.582373	-1466.81	Bd1-1vsBd3-1	CG
Bd1	4511846	4512548	703	72	0.382296	0.922945	-0.540649	-1466.63	Bd1-1vsBd3-1	CG
Bd1	32660031	32660569	539	100	0.491756	0.219365	0.272391	1466.57	Bd1-1vsBd3-1	CG
Bd1	47646895	47647744	850	94	0.431815	0.825953	-0.394138	-1464.68	Bd1-1vsBd3-1	CG
Bd1	64372893	64373485	593	72	0.891018	0.408022	0.482996	1463.94	Bd1-1vsBd3-1	CG
Bd1	39637813	39638565	753	86	0.873639	0.436034	0.437605	1458.31	Bd1-1vsBd3-1	CG
Bd1	65226127	65226725	599	70	0.152555	0.64211	-0.489555	-1457.1	Bd1-1vsBd3-1	CG
Bd1	71004970	71006423	1454	288	0.932712	0.634019	0.298694	1456.04	Bd1-1vsBd3-1	CG
Bd1	41565006	41566009	1004	210	0.677354	0.946433	-0.269078	-1456.01	Bd1-1vsBd3-1	CG
Bd1	17764871	17765532	662	63	0.58401	0.0551805	0.528829	1454.9	Bd1-1vsBd3-1	CG
Bd1	56729394	56730078	685	56	0.0877529	0.656087	-0.568334	-1454.71	Bd1-1vsBd3-1	CG
Bd1	32768441	32769450	1010	196	0.753241	0.953334	-0.200092	-1447.78	Bd1-1vsBd3-1	CG
Bd1	36813251	36814041	791	172	0.664192	0.962352	-0.29816	-1447.14	Bd1-1vsBd3-1	CG
Bd1	16068562	16069021	460	52	0.938405	0.227056	0.711349	1445.61	Bd1-1vsBd3-1	CG
Bd1	71665921	71667931	2011	114	0.699985	0.166178	0.533807	1445.17	Bd1-1vsBd3-1	CG
Bd1	275285	275849	565	102	0.459435	0.691349	-0.231914	-1444.16	Bd1-1vsBd3-1	CG
Bd1	63953602	63954152	551	72	0.648375	0.166365	0.48201	1442.16	Bd1-1vsBd3-1	CG
Bd1	69397471	69398166	696	50	0.735628	0.056402	0.679226	1435.57	Bd1-1vsBd3-1	CG
Bd1	7724262	7724975	714	79	0.0554109	0.421423	-0.366012	-1434.86	Bd1-1vsBd3-1	CG
Bd1	34388766	34389542	777	79	0.684652	0.282391	0.402261	1432.12	Bd1-1vsBd3-1	CG
Bd1	34941366	34942392	1027	265	0.592315	0.958574	-0.366259	-1430.4	Bd1-1vsBd3-1	CG
Bd1	21995926	21997376	1451	315	0.941015	0.609033	0.331982	1430.32	Bd1-1vsBd3-1	CG
Bd1	55922491	55923866	1376	89	0.0497944	0.502885	-0.453091	-1429.21	Bd1-1vsBd3-1	CG
Bd1	1041488	1041854	367	60	0.049603	0.596046	-0.546444	-1428.13	Bd1-1vsBd3-1	CG
Bd1	42034982	42036410	1429	243	0.663483	0.95038	-0.286897	-1423.55	Bd1-1vsBd3-1	CG
Bd1	1413320	1413903	584	80	0.147221	0.614025	-0.466804	-1420.64	Bd1-1vsBd3-1	CG
Bd1	1988596	1989305	710	64	0.274547	0.866069	-0.591522	-1419.42	Bd1-1vsBd3-1	CG
Bd1	14664971	14665512	542	66	0.748353	0.25579	0.492563	1419.2	Bd1-1vsBd3-1	CG
Bd1	33000666	33001999	1334	56	0.166091	0.866243	-0.700152	-1418.28	Bd1-1vsBd3-1	CG
Bd1	70266482	70267307	826	80	0.949239	0.546713	0.402526	1418.1	Bd1-1vsBd3-1	CG
Bd1	28856278	28857008	731	68	0.697309	0.103414	0.593894	1415.64	Bd1-1vsBd3-1	CG
Bd1	54231270	54232883	1614	71	0.896006	0.134389	0.761617	1415.5	Bd1-1vsBd3-1	CG
Bd1	30191267	30192793	1527	48	0.827296	0.0722326	0.755063	1412.98	Bd1-1vsBd3-1	CG
Bd1	64498312	64498955	644	52	0.131923	0.762329	-0.630405	-1412.72	Bd1-1vsBd3-1	CG
Bd1	14313581	14314194	614	95	0.8028	0.430497	0.372303	1410.96	Bd1-1vsBd3-1	CG
Bd1	54366322	54367302	981	101	0.325917	0.74199	-0.416073	-1410.25	Bd1-1vsBd3-1	CG
Bd1	50425840	50426695	856	70	0.748815	0.168978	0.579837	1407.26	Bd1-1vsBd3-1	CG
Bd1	72502680	72504526	1847	85	0.558618	0.0809038	0.477714	1407.25	Bd1-1vsBd3-1	CG
Bd1	48440724	48441678	955	250	0.953829	0.690766	0.263064	1407.19	Bd1-1vsBd3-1	CG
Bd1	67425005	67427083	2079	96	0.900714	0.355642	0.545072	1407.02	Bd1-1vsBd3-1	CG
Bd1	30584471	30585246	776	57	0.941468	0.398422	0.543046	1404.25	Bd1-1vsBd3-1	CG
Bd1	28693825	28694607	783	62	0.900473	0.378383	0.52209	1404	Bd1-1vsBd3-1	CG
Bd1	20727342	20728069	728	197	0.703398	0.943171	-0.239772	-1402.53	Bd1-1vsBd3-1	CG
Bd1	58099694	58100279	586	84	0.574518	0.0935249	0.480993	1401.86	Bd1-1vsBd3-1	CG
Bd1	56331000	56331533	534	108	0.626979	0.945226	-0.318247	-1398.6	Bd1-1vsBd3-1	CG
Bd1	57785178	57786236	1059	236	0.942333	0.685353	0.256979	1398.19	Bd1-1vsBd3-1	CG
Bd1	44821162	44821637	476	84	0.570788	0.33797	0.232818	1391.64	Bd1-1vsBd3-1	CG
Bd1	26150680	26151330	651	90	0.25655	0.632732	-0.376182	-1391.26	Bd1-1vsBd3-1	CG
Bd1	41984016	41984842	827	157	0.664822	0.935872	-0.27105	-1388.32	Bd1-1vsBd3-1	CG
Bd1	33955965	33956903	939	116	0.774884	0.453643	0.321241	1387.59	Bd1-1vsBd3-1	CG
Bd1	33315996	33317004	1009	88	0.411502	0.858007	-0.446505	-1385.88	Bd1-1vsBd3-1	CG
Bd1	48028476	48029515	1040	173	0.722823	0.957709	-0.234886	-1384.63	Bd1-1vsBd3-1	CG
Bd1	49921855	49922279	425	64	0.856263	0.262052	0.594211	1380.83	Bd1-1vsBd3-1	CG
Bd1	13774587	13776283	1697	70	0.112578	0.823856	-0.711278	-1380.43	Bd1-1vsBd3-1	CG
Bd1	58733735	58734591	857	62	0.201753	0.812334	-0.610581	-1379.07	Bd1-1vsBd3-1	CG
Bd1	5446547	5447008	462	48	0.81224	0.248137	0.564103	1377.34	Bd1-1vsBd3-1	CG
Bd1	61326016	61326742	727	62	0.910949	0.239673	0.671276	1376.6	Bd1-1vsBd3-1	CG
Bd1	42063741	42064548	808	168	0.71764	0.942824	-0.225183	-1374.83	Bd1-1vsBd3-1	CG
Bd1	888958	889682	725	84	0.50971	0.0396273	0.470083	1372.41	Bd1-1vsBd3-1	CG
Bd1	60899290	60900092	803	78	0.191723	0.657984	-0.466262	-1370	Bd1-1vsBd3-1	CG
Bd1	74209469	74210218	750	63	0.813715	0.208265	0.60545	1369.25	Bd1-1vsBd3-1	CG
Bd1	22037	23250	1214	143	0.915888	0.366825	0.549063	1368.08	Bd1-1vsBd3-1	CG
Bd1	58835284	58836376	1093	109	0.644992	0.95987	-0.314878	-1367.89	Bd1-1vsBd3-1	CG
Bd1	24513727	24514233	507	44	0.197686	0.895054	-0.697367	-1365.86	Bd1-1vsBd3-1	CG
Bd1	65390411	65391131	721	42	0.802894	0.0953214	0.707573	1362.1	Bd1-1vsBd3-1	CG
Bd1	45494062	45495225	1164	84	0.845066	0.308189	0.536877	1361.59	Bd1-1vsBd3-1	CG
Bd1	60183696	60184229	534	41	0.0793684	0.845075	-0.765706	-1360.91	Bd1-1vsBd3-1	CG
Bd1	57983050	57983565	516	78	0.266746	0.736815	-0.470069	-1357.73	Bd1-1vsBd3-1	CG
Bd1	49017477	49018130	654	45	0.0927454	0.868624	-0.775879	-1357.38	Bd1-1vsBd3-1	CG
Bd1	47874421	47875145	725	68	0.573429	0.0739148	0.499514	1357.02	Bd1-1vsBd3-1	CG
Bd1	10301447	10301949	503	92	0.959554	0.675696	0.283858	1356.94	Bd1-1vsBd3-1	CG
Bd1	38501703	38502238	536	144	0.767865	0.956787	-0.188923	-1354.25	Bd1-1vsBd3-1	CG
Bd1	21657593	21659092	1500	78	0.795168	0.216329	0.578838	1352.81	Bd1-1vsBd3-1	CG
Bd1	14385796	14386401	606	63	0.677017	0.109451	0.567567	1352.6	Bd1-1vsBd3-1	CG
Bd1	56509080	56509796	717	62	0.875908	0.283133	0.592775	1350.37	Bd1-1vsBd3-1	CG
Bd1	32405228	32406020	793	70	0.356524	0.824711	-0.468187	-1348.22	Bd1-1vsBd3-1	CG
Bd1	35952679	35953392	714	84	0.573495	0.951347	-0.377852	-1347.22	Bd1-1vsBd3-1	CG
Bd1	51528011	51528612	602	52	0.780213	0.102942	0.677272	1345.64	Bd1-1vsBd3-1	CG
Bd1	57476464	57477441	978	67	0.792732	0.132716	0.660016	1345.25	Bd1-1vsBd3-1	CG
Bd1	71467032	71468292	1261	247	0.686988	0.954937	-0.267949	-1343.92	Bd1-1vsBd3-1	CG
Bd1	25380191	25380946	756	49	0.0754194	0.826985	-0.751565	-1342.67	Bd1-1vsBd3-1	CG
Bd1	69157137	69158354	1218	240	0.660631	0.959068	-0.298437	-1342.07	Bd1-1vsBd3-1	CG
Bd1	48431241	48432208	968	217	0.937569	0.674308	0.263261	1341.51	Bd1-1vsBd3-1	CG
Bd1	5700466	5701069	604	43	0.0523465	0.79311	-0.740764	-1340.24	Bd1-1vsBd3-1	CG
Bd1	25475896	25476442	547	68	0.765409	0.223439	0.54197	1337.37	Bd1-1vsBd3-1	CG
Bd1	47942060	47942699	640	56	0.13986	0.734929	-0.595069	-1337.27	Bd1-1vsBd3-1	CG
Bd1	28602915	28603809	895	157	0.963053	0.755114	0.207939	1335.9	Bd1-1vsBd3-1	CG
Bd1	39629490	39629968	479	40	0.108897	0.913387	-0.80449	-1334.98	Bd1-1vsBd3-1	CG
Bd1	27314424	27315610	1187	85	0.623819	0.109728	0.51409	1327.19	Bd1-1vsBd3-1	CG
Bd1	40231854	40232400	547	58	0.29624	0.787927	-0.491688	-1325.87	Bd1-1vsBd3-1	CG
Bd1	55969003	55969669	667	72	0.0618955	0.508474	-0.446578	-1325.29	Bd1-1vsBd3-1	CG
Bd1	32871114	32871872	759	49	0.161317	0.934352	-0.773035	-1324.81	Bd1-1vsBd3-1	CG
Bd1	1642452	1642859	408	41	0.825417	0.102311	0.723105	1321.84	Bd1-1vsBd3-1	CG
Bd1	41602005	41602543	539	48	0.0788978	0.75974	-0.680842	-1318.21	Bd1-1vsBd3-1	CG
Bd1	25555329	25555982	654	119	0.534175	0.747713	-0.213537	-1317.76	Bd1-1vsBd3-1	CG
Bd1	67910311	67911316	1006	249	0.62331	0.951608	-0.328297	-1317.54	Bd1-1vsBd3-1	CG
Bd1	55919304	55920145	842	76	0.12807	0.612383	-0.484313	-1316.44	Bd1-1vsBd3-1	CG
Bd1	3507239	3507881	643	41	0.191957	0.941005	-0.749048	-1313.09	Bd1-1vsBd3-1	CG
Bd1	28690105	28690822	718	42	0.15537	0.852933	-0.697563	-1311.56	Bd1-1vsBd3-1	CG
Bd1	61663558	61664492	935	53	0.101772	0.846643	-0.744871	-1309.9	Bd1-1vsBd3-1	CG
Bd1	6665537	6665972	436	105	0.751592	0.919945	-0.168354	-1308.87	Bd1-1vsBd3-1	CG
Bd1	9136382	9137375	994	59	0.328112	0.936338	-0.608226	-1308.13	Bd1-1vsBd3-1	CG
Bd1	54751191	54751719	529	79	0.0480644	0.277067	-0.229003	-1307.91	Bd1-1vsBd3-1	CG
Bd1	56470229	56472337	2109	115	0.0516987	0.474247	-0.422548	-1307.69	Bd1-1vsBd3-1	CG
Bd1	30802893	30803534	642	44	0.365874	0.961097	-0.595223	-1306	Bd1-1vsBd3-1	CG
Bd1	6164050	6164652	603	32	0.91259	0.177734	0.734857	1302.34	Bd1-1vsBd3-1	CG
Bd1	50869424	50869823	400	64	0.80419	0.158071	0.646119	1301.06	Bd1-1vsBd3-1	CG
Bd1	5964587	5965199	613	161	0.673104	0.955821	-0.282717	-1300.98	Bd1-1vsBd3-1	CG
Bd1	16016215	16016667	453	102	0.791086	0.946437	-0.155351	-1299.71	Bd1-1vsBd3-1	CG
Bd1	42037274	42038378	1105	202	0.733836	0.955037	-0.221201	-1298.02	Bd1-1vsBd3-1	CG
Bd1	67877161	67877734	574	40	0.123311	0.946612	-0.823301	-1296.72	Bd1-1vsBd3-1	CG
Bd1	48807704	48808742	1039	92	0.356448	0.678814	-0.322367	-1294.16	Bd1-1vsBd3-1	CG
Bd1	4906104	4906660	557	48	0.185659	0.796483	-0.610824	-1294.01	Bd1-1vsBd3-1	CG
Bd1	20570086	20570601	516	40	0.898673	0.145882	0.75279	1292.06	Bd1-1vsBd3-1	CG
Bd1	68872799	68873582	784	46	0.78218	0.125472	0.656708	1291.62	Bd1-1vsBd3-1	CG
Bd1	69861573	69862500	928	72	0.279532	0.7952	-0.515668	-1288.99	Bd1-1vsBd3-1	CG
Bd1	47375609	47376466	858	184	0.774474	0.957236	-0.182762	-1286.19	Bd1-1vsBd3-1	CG
Bd1	57434615	57436077	1463	248	0.958772	0.645747	0.313025	1285.18	Bd1-1vsBd3-1	CG
Bd1	62947086	62947432	347	64	0.232849	0.84756	-0.614711	-1284.71	Bd1-1vsBd3-1	CG
Bd1	14654031	14655311	1281	88	0.40552	0.831941	-0.426421	-1281.42	Bd1-1vsBd3-1	CG
Bd1	70390396	70390727	332	44	0.208302	0.581893	-0.373591	-1279.4	Bd1-1vsBd3-1	CG
Bd1	30776912	30777625	714	78	0.504849	0.893574	-0.388725	-1275.47	Bd1-1vsBd3-1	CG
Bd1	58076612	58077562	951	94	0.953934	0.257921	0.696013	1273.21	Bd1-1vsBd3-1	CG
Bd1	16224887	16225590	704	66	0.894297	0.391812	0.502485	1272.44	Bd1-1vsBd3-1	CG
Bd1	71627322	71628301	980	86	0.484381	0.882497	-0.398115	-1271.76	Bd1-1vsBd3-1	CG
Bd1	23726958	23727848	891	234	0.69249	0.943687	-0.251197	-1270.61	Bd1-1vsBd3-1	CG
Bd1	13563331	13564362	1032	78	0.844586	0.31014	0.534445	1270.29	Bd1-1vsBd3-1	CG
Bd1	58753837	58754854	1018	97	0.597529	0.185877	0.411651	1269.59	Bd1-1vsBd3-1	CG
Bd1	42416202	42417101	900	135	0.713907	0.957894	-0.243987	-1268.17	Bd1-1vsBd3-1	CG
Bd1	46491965	46493896	1932	94	0.151137	0.710626	-0.559488	-1267.88	Bd1-1vsBd3-1	CG
Bd1	10052086	10052722	637	44	0.863287	0.119157	0.74413	1267.52	Bd1-1vsBd3-1	CG
Bd1	37306811	37307888	1078	231	0.658309	0.958126	-0.299817	-1266.98	Bd1-1vsBd3-1	CG
Bd1	46078172	46080133	1962	85	0.915872	0.315663	0.600209	1264.8	Bd1-1vsBd3-1	CG
Bd1	29977669	29978307	639	31	0.11815	0.953639	-0.835489	-1263.29	Bd1-1vsBd3-1	CG
Bd1	59317172	59318146	975	67	0.912633	0.359079	0.553554	1262.71	Bd1-1vsBd3-1	CG
Bd1	64050772	64051436	665	42	0.0436721	0.757443	-0.713771	-1262.56	Bd1-1vsBd3-1	CG
Bd1	70937243	70937712	470	151	0.931156	0.764817	0.166339	1262.03	Bd1-1vsBd3-1	CG
Bd1	16482362	16482903	542	46	0.0341819	0.649415	-0.615233	-1261.71	Bd1-1vsBd3-1	CG
Bd1	48023042	48023831	790	150	0.750683	0.960794	-0.210111	-1260.47	Bd1-1vsBd3-1	CG
Bd1	60922204	60923181	978	72	0.117621	0.580739	-0.463118	-1258.91	Bd1-1vsBd3-1	CG
Bd1	25860891	25861538	648	88	0.613455	0.835084	-0.221629	-1258.74	Bd1-1vsBd3-1	CG
Bd1	30454963	30455658	696	86	0.456513	0.0919857	0.364527	1258.2	Bd1-1vsBd3-1	CG
Bd1	28911604	28912118	515	36	0.878045	0.0983879	0.779657	1257.69	Bd1-1vsBd3-1	CG
Bd1	21067083	21067643	561	44	0.181501	0.845217	-0.663716	-1257.27	Bd1-1vsBd3-1	CG
Bd1	36913391	36913991	601	160	0.786816	0.953815	-0.166999	-1256.65	Bd1-1vsBd3-1	CG
Bd1	17729850	17730860	1011	73	0.0911118	0.54392	-0.452808	-1255.91	Bd1-1vsBd3-1	CG
Bd1	72232445	72233590	1146	170	0.366909	0.893001	-0.526092	-1254.96	Bd1-1vsBd3-1	CG
Bd1	63104942	63105478	537	46	0.871337	0.144328	0.727009	1254.67	Bd1-1vsBd3-1	CG
Bd1	67968819	67969676	858	58	0.25002	0.950143	-0.700124	-1254.13	Bd1-1vsBd3-1	CG
Bd1	40884620	40886527	1908	102	0.737567	0.240968	0.496598	1252.51	Bd1-1vsBd3-1	CG
Bd1	29755139	29755729	591	70	0.468443	0.88775	-0.419306	-1252.39	Bd1-1vsBd3-1	CG
Bd1	42359041	42359465	425	42	0.108407	0.913726	-0.805319	-1251.85	Bd1-1vsBd3-1	CG
Bd1	67100525	67101466	942	48	0.0797103	0.725453	-0.645743	-1250.27	Bd1-1vsBd3-1	CG
Bd1	33160626	33161448	823	64	0.382984	0.91375	-0.530766	-1249.27	Bd1-1vsBd3-1	CG
Bd1	48905353	48906064	712	82	0.824687	0.446765	0.377922	1248.33	Bd1-1vsBd3-1	CG
Bd1	38502884	38503746	863	196	0.742889	0.950295	-0.207406	-1246.33	Bd1-1vsBd3-1	CG
Bd1	332353	332913	561	46	0.195896	0.807657	-0.611761	-1245.13	Bd1-1vsBd3-1	CG
Bd1	19093349	19093990	642	60	0.16681	0.71463	-0.54782	-1245.08	Bd1-1vsBd3-1	CG
Bd1	55945855	55947347	1493	48	0.0617877	0.909241	-0.847453	-1244.77	Bd1-1vsBd3-1	CG
Bd1	3828111	3828794	684	49	0.703108	0.0702777	0.63283	1243.48	Bd1-1vsBd3-1	CG
Bd1	22902247	22902763	517	54	0.966496	0.396978	0.569518	1242.65	Bd1-1vsBd3-1	CG
Bd1	18992931	18993442	512	68	0.0626441	0.392185	-0.329541	-1242.24	Bd1-1vsBd3-1	CG
Bd1	68388226	68388761	536	76	0.428775	0.102337	0.326438	1242.2	Bd1-1vsBd3-1	CG
Bd1	5405861	5407943	2083	73	0.861817	0.104038	0.757779	1238.4	Bd1-1vsBd3-1	CG
Bd1	862176	863315	1140	71	0.833269	0.293927	0.539342	1237.48	Bd1-1vsBd3-1	CG
Bd1	49773125	49773874	750	50	0.121864	0.739257	-0.617392	-1236.06	Bd1-1vsBd3-1	CG
Bd1	70741806	70742647	842	74	0.527513	0.952716	-0.425203	-1235.94	Bd1-1vsBd3-1	CG
Bd1	5417695	5418158	464	100	0.426317	0.229195	0.197122	1234.94	Bd1-1vsBd3-1	CG
Bd1	38786125	38786789	665	46	0.848738	0.13512	0.713617	1233.11	Bd1-1vsBd3-1	CG
Bd1	57590768	57592155	1388	306	0.961791	0.582443	0.379347	1232.36	Bd1-1vsBd3-1	CG
Bd1	67629381	67629846	466	48	0.839572	0.115921	0.723651	1231.21	Bd1-1vsBd3-1	CG
Bd1	51894567	51895349	783	49	0.209879	0.948717	-0.738838	-1230.57	Bd1-1vsBd3-1	CG
Bd1	62067183	62067961	779	35	0.0599087	0.865089	-0.805181	-1230.36	Bd1-1vsBd3-1	CG
Bd1	16006040	16006758	719	80	0.468352	0.939598	-0.471246	-1229.72	Bd1-1vsBd3-1	CG
Bd1	9713305	9713928	624	49	0.0700246	0.692831	-0.622806	-1229.28	Bd1-1vsBd3-1	CG
Bd1	7085383	7086038	656	54	0.347669	0.912336	-0.564667	-1229.18	Bd1-1vsBd3-1	CG
Bd1	46757151	46757842	692	97	0.591848	0.827877	-0.236029	-1228.21	Bd1-1vsBd3-1	CG
Bd1	38510880	38511594	715	167	0.748848	0.956656	-0.207808	-1226.93	Bd1-1vsBd3-1	CG
Bd1	70185791	70186460	670	47	0.710302	0.0380361	0.672266	1226.9	Bd1-1vsBd3-1	CG
Bd1	56993727	56994713	987	183	0.953233	0.696603	0.25663	1223.45	Bd1-1vsBd3-1	CG
Bd1	68995691	68996402	712	64	0.199929	0.788316	-0.588388	-1220.83	Bd1-1vsBd3-1	CG
Bd1	47467858	47468561	704	48	0.683005	0.06245	0.620555	1220.09	Bd1-1vsBd3-1	CG
Bd1	46403419	46403970	552	91	0.416523	0.146835	0.269688	1219.94	Bd1-1vsBd3-1	CG
Bd1	72928872	72929478	607	40	0.862476	0.113325	0.749151	1218.72	Bd1-1vsBd3-1	CG
Bd1	70997251	70998171	921	200	0.966848	0.697389	0.269459	1215.25	Bd1-1vsBd3-1	CG
Bd1	25612531	25612922	392	44	0.954856	0.308632	0.646225	1215.18	Bd1-1vsBd3-1	CG
Bd1	63623528	63624702	1175	52	0.0925195	0.842563	-0.750044	-1213.81	Bd1-1vsBd3-1	CG
Bd1	57348122	57348687	566	78	0.823042	0.457996	0.365045	1213.47	Bd1-1vsBd3-1	CG
Bd1	16030073	16030422	350	80	0.50755	0.751848	-0.244298	-1213.26	Bd1-1vsBd3-1	CG
Bd1	35214546	35215184	639	38	0.963678	0.202944	0.760735	1211.82	Bd1-1vsBd3-1	CG
Bd1	20090010	20091026	1017	84	0.278039	0.773111	-0.495073	-1211.66	Bd1-1vsBd3-1	CG
Bd1	66139125	66139560	436	77	0.197955	0.45325	-0.255295	-1211.3	Bd1-1vsBd3-1	CG
Bd1	31039983	31040901	919	164	0.962712	0.749561	0.213151	1210.68	Bd1-1vsBd3-1	CG
Bd1	73663620	73664483	864	54	0.0776575	0.735542	-0.657884	-1209.96	Bd1-1vsBd3-1	CG
Bd1	1053309	1053838	530	52	0.081321	0.701206	-0.619885	-1209.52	Bd1-1vsBd3-1	CG
Bd1	60543392	60544254	863	36	0.945021	0.0981998	0.846821	1206.89	Bd1-1vsBd3-1	CG
Bd1	65119177	65120337	1161	52	0.186249	0.846375	-0.660126	-1205.9	Bd1-1vsBd3-1	CG
Bd1	21780038	21780806	769	166	0.73088	0.932542	-0.201662	-1205.15	Bd1-1vsBd3-1	CG
Bd1	62108930	62109391	462	92	0.146956	0.344056	-0.197101	-1204.47	Bd1-1vsBd3-1	CG
Bd1	23743825	23744898	1074	158	0.735631	0.955639	-0.220007	-1203.3	Bd1-1vsBd3-1	CG
Bd1	33754543	33755043	501	41	0.94518	0.141982	0.803197	1202.95	Bd1-1vsBd3-1	CG
Bd1	52435060	52435505	446	66	0.0740598	0.433416	-0.359356	-1201.88	Bd1-1vsBd3-1	CG
Bd1	16228011	16228442	432	88	0.346179	0.697035	-0.350856	-1200.71	Bd1-1vsBd3-1	CG
Bd1	55872582	55874717	2136	68	0.169339	0.832114	-0.662775	-1200.29	Bd1-1vsBd3-1	CG
Bd1	42412905	42413991	1087	188	0.73004	0.956556	-0.226516	-1198.53	Bd1-1vsBd3-1	CG
Bd1	29000612	29001360	749	58	0.0968133	0.718957	-0.622144	-1198.26	Bd1-1vsBd3-1	CG
Bd1	23204778	23205583	806	66	0.580008	0.0719485	0.508059	1198.25	Bd1-1vsBd3-1	CG
Bd1	49968799	49969205	407	44	0.94886	0.360202	0.588658	1198	Bd1-1vsBd3-1	CG
Bd1	61841569	61842062	494	86	0.178225	0.539922	-0.361697	-1197.49	Bd1-1vsBd3-1	CG
Bd1	61764697	61765094	398	39	0.102892	0.748384	-0.645492	-1196.65	Bd1-1vsBd3-1	CG
Bd1	41995827	41996430	604	46	0.917201	0.2458	0.671401	1193.65	Bd1-1vsBd3-1	CG
Bd1	53838430	53838918	489	42	0.3084	0.946648	-0.638248	-1192.73	Bd1-1vsBd3-1	CG
Bd1	22012560	22013091	532	72	0.161966	0.558607	-0.396641	-1191.77	Bd1-1vsBd3-1	CG
Bd1	59528861	59530763	1903	243	0.659215	0.950326	-0.291111	-1191.06	Bd1-1vsBd3-1	CG
Bd1	15090285	15091194	910	102	0.818371	0.544418	0.273953	1189.79	Bd1-1vsBd3-1	CG
Bd1	61961244	61962069	826	46	0.712136	0.0631715	0.648965	1188.58	Bd1-1vsBd3-1	CG
Bd1	37265379	37266428	1050	184	0.740584	0.966342	-0.225758	-1187.96	Bd1-1vsBd3-1	CG
Bd1	13611070	13612058	989	67	0.820607	0.213078	0.607528	1185.49	Bd1-1vsBd3-1	CG
Bd1	56080573	56081546	974	70	0.141794	0.808718	-0.666925	-1182.28	Bd1-1vsBd3-1	CG
Bd1	62527949	62528452	504	84	0.813399	0.594529	0.21887	1182.27	Bd1-1vsBd3-1	CG
Bd1	60047901	60048473	573	70	0.920443	0.46355	0.456893	1181.22	Bd1-1vsBd3-1	CG
Bd1	40729072	40730205	1134	174	0.67302	0.948835	-0.275814	-1180.45	Bd1-1vsBd3-1	CG
Bd1	10911065	10911721	657	143	0.763178	0.951514	-0.188336	-1179.52	Bd1-1vsBd3-1	CG
Bd1	9275997	9276747	751	92	0.536375	0.856498	-0.320123	-1179.48	Bd1-1vsBd3-1	CG
Bd1	60276303	60277128	826	54	0.883378	0.167787	0.715592	1178.61	Bd1-1vsBd3-1	CG
Bd1	100376	101545	1170	56	0.755421	0.124313	0.631108	1177.57	Bd1-1vsBd3-1	CG
Bd1	21997632	21998875	1244	217	0.948761	0.64266	0.306101	1176.18	Bd1-1vsBd3-1	CG
Bd1	52350139	52351860	1722	69	0.907082	0.357206	0.549877	1172.35	Bd1-1vsBd3-1	CG
Bd1	3078350	3079073	724	48	0.819175	0.15938	0.659796	1171.81	Bd1-1vsBd3-1	CG
Bd1	28210152	28210748	597	64	0.87398	0.333642	0.540338	1169.8	Bd1-1vsBd3-1	CG
Bd1	15528859	15529693	835	60	0.891731	0.34973	0.542001	1169.24	Bd1-1vsBd3-1	CG
Bd1	30210943	30211579	637	62	0.849229	0.35083	0.498399	1164.93	Bd1-1vsBd3-1	CG
Bd1	74424272	74424727	456	102	0.70034	0.401604	0.298736	1164.44	Bd1-1vsBd3-1	CG
Bd1	5884853	5885432	580	40	0.232172	0.929955	-0.697783	-1164.4	Bd1-1vsBd3-1	CG
Bd1	73334255	73334677	423	78	0.562158	0.826516	-0.264357	-1163.97	Bd1-1vsBd3-1	CG
Bd1	32301188	32301812	625	52	0.638802	0.0489155	0.589886	1162.39	Bd1-1vsBd3-1	CG
Bd1	61980506	61980951	446	96	0.946554	0.611994	0.33456	1161.52	Bd1-1vsBd3-1	CG
Bd1	24481363	24482570	1208	212	0.947593	0.664491	0.283102	1160.88	Bd1-1vsBd3-1	CG
Bd1	47017328	47018570	1243	122	0.363725	0.640351	-0.276627	-1160.58	Bd1-1vsBd3-1	CG
Bd1	7658861	7659393	533	60	0.514382	0.0636441	0.450738	1159.83	Bd1-1vsBd3-1	CG
Bd1	20559974	20560629	656	41	0.101593	0.845824	-0.744231	-1159.71	Bd1-1vsBd3-1	CG
Bd1	38487774	38488878	1105	168	0.69477	0.947903	-0.253133	-1158.94	Bd1-1vsBd3-1	CG
Bd1	32089295	32090770	1476	58	0.939047	0.291788	0.647259	1158.78	Bd1-1vsBd3-1	CG
Bd1	54765391	54766021	631	58	0.302443	0.835467	-0.533024	-1158.71	Bd1-1vsBd3-1	CG
Bd1	43429338	43429717	380	57	0.493079	0.0566953	0.436384	1158.57	Bd1-1vsBd3-1	CG
Bd1	57879699	57880219	521	86	0.768058	0.397982	0.370076	1157.66	Bd1-1vsBd3-1	CG
Bd1	55758042	55758718	677	45	0.716635	0.0360844	0.680551	1155.11	Bd1-1vsBd3-1	CG
Bd1	25280296	25280741	446	86	0.356391	0.550665	-0.194274	-1153.84	Bd1-1vsBd3-1	CG
Bd1	41938174	41938947	774	166	0.687823	0.946872	-0.259049	-1152.37	Bd1-1vsBd3-1	CG
Bd1	11130578	11131142	565	46	0.715021	0.0730787	0.641943	1151.95	Bd1-1vsBd3-1	CG
Bd1	3357875	3358536	662	56	0.957124	0.45107	0.506053	1150.22	Bd1-1vsBd3-1	CG
Bd1	52509498	52510228	731	62	0.878358	0.280381	0.597977	1149.36	Bd1-1vsBd3-1	CG
Bd1	66959860	66960741	882	82	0.176781	0.594646	-0.417865	-1149.06	Bd1-1vsBd3-1	CG
Bd1	33803158	33803593	436	80	0.201102	0.428294	-0.227191	-1148.54	Bd1-1vsBd3-1	CG
Bd1	23588023	23589111	1089	84	0.159628	0.626178	-0.46655	-1145.63	Bd1-1vsBd3-1	CG
Bd1	40627345	40627881	537	54	0.925759	0.291368	0.634391	1145.5	Bd1-1vsBd3-1	CG
Bd1	27963006	27964279	1274	87	0.365783	0.859429	-0.493646	-1145.44	Bd1-1vsBd3-1	CG
Bd1	26159024	26159778	755	101	0.178024	0.520807	-0.342784	-1145.1	Bd1-1vsBd3-1	CG
Bd1	42096325	42096642	318	58	0.0802257	0.475199	-0.394974	-1144.79	Bd1-1vsBd3-1	CG
Bd1	70551629	70552232	604	92	0.510076	0.155794	0.354283	1143.92	Bd1-1vsBd3-1	CG
Bd1	12477244	12477823	580	41	0.763671	0.0730261	0.690645	1142.46	Bd1-1vsBd3-1	CG
Bd1	55144027	55144690	664	66	0.272761	0.703072	-0.430311	-1142.41	Bd1-1vsBd3-1	CG
Bd1	1279752	1280311	560	63	0.804958	0.416343	0.388616	1140.42	Bd1-1vsBd3-1	CG
Bd1	61406473	61406918	446	69	0.236459	0.712439	-0.47598	-1140.4	Bd1-1vsBd3-1	CG
Bd1	15689725	15690094	370	46	0.61016	0.191546	0.418614	1137.44	Bd1-1vsBd3-1	CG
Bd1	30787963	30788386	424	60	0.523469	0.0612932	0.462176	1137.28	Bd1-1vsBd3-1	CG
Bd1	57545301	57546364	1064	200	0.961381	0.652581	0.308801	1137.17	Bd1-1vsBd3-1	CG
Bd1	30898578	30900155	1578	221	0.965224	0.688882	0.276342	1136.83	Bd1-1vsBd3-1	CG
Bd1	70710938	70711467	530	56	0.815202	0.283623	0.531579	1133.49	Bd1-1vsBd3-1	CG
Bd1	68553412	68554215	804	58	0.805758	0.228793	0.576965	1132.88	Bd1-1vsBd3-1	CG
Bd1	54494972	54496280	1309	82	0.943623	0.494012	0.449611	1131.68	Bd1-1vsBd3-1	CG
Bd1	2585406	2586062	657	34	0.784478	0.0550653	0.729413	1131.21	Bd1-1vsBd3-1	CG
Bd1	46620495	46621108	614	80	0.0368356	0.270365	-0.233529	-1130.38	Bd1-1vsBd3-1	CG
Bd1	59328441	59328989	549	38	0.708972	0.0291672	0.679805	1130.09	Bd1-1vsBd3-1	CG
Bd1	27902943	27903825	883	80	0.705518	0.218849	0.486669	1128.93	Bd1-1vsBd3-1	CG
Bd1	51099215	51100325	1111	78	0.766752	0.209316	0.557436	1128.83	Bd1-1vsBd3-1	CG
Bd1	17673390	17674192	803	97	0.358516	0.840888	-0.482372	-1128.69	Bd1-1vsBd3-1	CG
Bd1	32428580	32429113	534	89	0.854999	0.499727	0.355272	1128.65	Bd1-1vsBd3-1	CG
Bd1	40051288	40052025	738	66	0.225237	0.737568	-0.512331	-1128.09	Bd1-1vsBd3-1	CG
Bd1	68868745	68869110	366	70	0.415648	0.757045	-0.341397	-1127.29	Bd1-1vsBd3-1	CG
Bd1	20564255	20564821	567	41	0.213509	0.929641	-0.716133	-1127.02	Bd1-1vsBd3-1	CG
Bd1	35392758	35393685	928	162	0.689348	0.947599	-0.258251	-1126.45	Bd1-1vsBd3-1	CG
Bd1	1886086	1886617	532	89	0.748134	0.349866	0.398269	1126.37	Bd1-1vsBd3-1	CG
Bd1	63505634	63506617	984	96	0.833478	0.546834	0.286645	1124.8	Bd1-1vsBd3-1	CG
Bd1	6365179	6366151	973	186	0.716701	0.959405	-0.242704	-1124.1	Bd1-1vsBd3-1	CG
Bd1	37266669	37267685	1017	187	0.732479	0.959743	-0.227264	-1123.95	Bd1-1vsBd3-1	CG
Bd1	55976673	55977258	586	94	0.177137	0.419252	-0.242115	-1122.43	Bd1-1vsBd3-1	CG
Bd1	7557761	7558521	761	107	0.440602	0.814947	-0.374345	-1122.39	Bd1-1vsBd3-1	CG
Bd1	9299271	9300140	870	62	0.852283	0.343411	0.508872	1122.17	Bd1-1vsBd3-1	CG
Bd1	23746794	23747293	500	134	0.793399	0.954168	-0.160769	-1119.42	Bd1-1vsBd3-1	CG
Bd1	70745559	70746419	861	42	0.946436	0.292009	0.654427	1118.86	Bd1-1vsBd3-1	CG
Bd1	64851938	64852470	533	90	0.329473	0.607708	-0.278235	-1116.06	Bd1-1vsBd3-1	CG
Bd1	18349005	18349904	900	55	0.0803505	0.70317	-0.62282	-1115.98	Bd1-1vsBd3-1	CG
Bd1	7925573	7925853	281	56	0.188993	0.546538	-0.357545	-1115.18	Bd1-1vsBd3-1	CG
Bd1	42371313	42372124	812	152	0.688076	0.956833	-0.268757	-1111.63	Bd1-1vsBd3-1	CG
Bd1	9900315	9900860	546	72	0.621941	0.114688	0.507253	1109.77	Bd1-1vsBd3-1	CG
Bd1	41786797	41787373	577	178	0.69774	0.938311	-0.240571	-1109.31	Bd1-1vsBd3-1	CG
Bd1	40628832	40629763	932	82	0.840867	0.393493	0.447373	1109.28	Bd1-1vsBd3-1	CG
Bd1	31586563	31588398	1836	70	0.0586962	0.697566	-0.63887	-1108.89	Bd1-1vsBd3-1	CG
Bd1	28401412	28403282	1871	96	0.211894	0.686204	-0.47431	-1106.81	Bd1-1vsBd3-1	CG
Bd1	58465837	58466343	507	66	0.0430005	0.324644	-0.281643	-1106.81	Bd1-1vsBd3-1	CG
Bd1	5972376	5973063	688	138	0.599642	0.952386	-0.352744	-1106.77	Bd1-1vsBd3-1	CG
Bd1	34804908	34805514	607	38	0.0916442	0.784031	-0.692386	-1104.87	Bd1-1vsBd3-1	CG
Bd1	60237880	60239606	1727	64	0.0642786	0.709791	-0.645512	-1104.39	Bd1-1vsBd3-1	CG
Bd1	15300146	15300930	785	55	0.0739606	0.622236	-0.548276	-1104.21	Bd1-1vsBd3-1	CG
Bd1	71733828	71734501	674	50	0.205088	0.837726	-0.632638	-1102.76	Bd1-1vsBd3-1	CG
Bd1	11362896	11364134	1239	38	0.927867	0.191467	0.7364	1102.71	Bd1-1vsBd3-1	CG
Bd1	52316163	52317635	1473	68	0.700355	0.109489	0.590866	1101.51	Bd1-1vsBd3-1	CG
Bd1	1358949	1360438	1490	102	0.669085	0.33264	0.336445	1101.25	Bd1-1vsBd3-1	CG
Bd1	16104751	16105213	463	94	0.629633	0.833287	-0.203655	-1101.06	Bd1-1vsBd3-1	CG
Bd1	61471203	61471545	343	34	0.795643	0.0599806	0.735663	1100.83	Bd1-1vsBd3-1	CG
Bd1	7012851	7013943	1093	218	0.627177	0.953113	-0.325936	-1100.06	Bd1-1vsBd3-1	CG
Bd1	47006114	47007299	1186	82	0.102524	0.513039	-0.410515	-1099.03	Bd1-1vsBd3-1	CG
Bd1	11934405	11934724	320	58	0.779308	0.289235	0.490072	1098.91	Bd1-1vsBd3-1	CG
Bd1	16079882	16080267	386	34	0.914752	0.186924	0.727828	1097.7	Bd1-1vsBd3-1	CG
Bd1	73442263	73443075	813	34	0.120831	0.849981	-0.72915	-1096.57	Bd1-1vsBd3-1	CG
Bd1	22478314	22478873	560	172	0.691566	0.939701	-0.248135	-1096.53	Bd1-1vsBd3-1	CG
Bd1	2619769	2620285	517	51	0.783116	0.216366	0.56675	1096.09	Bd1-1vsBd3-1	CG
Bd1	43544654	43545287	634	70	0.116081	0.457199	-0.341118	-1095.33	Bd1-1vsBd3-1	CG
Bd1	72772549	72773261	713	66	0.0293996	0.561147	-0.531747	-1093.35	Bd1-1vsBd3-1	CG
Bd1	74800406	74801120	715	42	0.272844	0.946317	-0.673473	-1092.02	Bd1-1vsBd3-1	CG
Bd1	57054046	57054732	687	79	0.573662	0.255316	0.318346	1092.02	Bd1-1vsBd3-1	CG
Bd1	56992648	56993642	995	204	0.949333	0.661962	0.287371	1090.1	Bd1-1vsBd3-1	CG
Bd1	5470952	5471594	643	56	0.889028	0.341854	0.547174	1088.59	Bd1-1vsBd3-1	CG
Bd1	20776663	20778449	1787	72	0.798083	0.14068	0.657403	1088.56	Bd1-1vsBd3-1	CG
Bd1	70174415	70174949	535	52	0.087272	0.643411	-0.556139	-1088.41	Bd1-1vsBd3-1	CG
Bd1	14714928	14715399	472	70	0.0379189	0.261456	-0.223537	-1086.99	Bd1-1vsBd3-1	CG
Bd1	41877192	41878419	1228	62	0.273494	0.929829	-0.656335	-1086.84	Bd1-1vsBd3-1	CG
Bd1	57828521	57829030	510	74	0.82487	0.461635	0.363235	1086.14	Bd1-1vsBd3-1	CG
Bd1	10128087	10128722	636	161	0.758816	0.937739	-0.178923	-1084.38	Bd1-1vsBd3-1	CG
Bd1	19394583	19395517	935	44	0.120248	0.809395	-0.689147	-1082.37	Bd1-1vsBd3-1	CG
Bd1	57717319	57718623	1305	239	0.966223	0.626527	0.339696	1081.87	Bd1-1vsBd3-1	CG
Bd1	42223110	42223843	734	33	0.102838	0.836034	-0.733196	-1081.58	Bd1-1vsBd3-1	CG
Bd1	25670677	25671279	603	48	0.673646	0.0620944	0.611551	1081.57	Bd1-1vsBd3-1	CG
Bd1	59954438	59954886	449	30	0.934699	0.0780983	0.856601	1080.94	Bd1-1vsBd3-1	CG
Bd1	58751139	58751817	679	68	0.0825155	0.523422	-0.440907	-1080.64	Bd1-1vsBd3-1	CG
Bd1	67783835	67784969	1135	81	0.647495	0.195875	0.45162	1079.89	Bd1-1vsBd3-1	CG
Bd1	56674993	56675534	542	86	0.436602	0.117617	0.318985	1079.6	Bd1-1vsBd3-1	CG
Bd1	43618579	43619121	543	46	0.69799	0.180577	0.517413	1079.24	Bd1-1vsBd3-1	CG
Bd1	2651799	2652482	684	55	0.937321	0.343201	0.59412	1077.83	Bd1-1vsBd3-1	CG
Bd1	56482342	56484023	1682	106	0.658653	0.316061	0.342592	1077	Bd1-1vsBd3-1	CG
Bd1	40740256	40741244	989	156	0.450748	0.845373	-0.394625	-1076.51	Bd1-1vsBd3-1	CG
Bd1	33337518	33338183	666	33	0.928016	0.283017	0.644999	1075.27	Bd1-1vsBd3-1	CG
Bd1	57642007	57642664	658	192	0.950875	0.637569	0.313306	1074.77	Bd1-1vsBd3-1	CG
Bd1	57386164	57387427	1264	238	0.960233	0.609811	0.350422	1074.58	Bd1-1vsBd3-1	CG
Bd1	49562775	49564728	1954	99	0.74282	0.190358	0.552461	1074.42	Bd1-1vsBd3-1	CG
Bd1	56289216	56289849	634	52	0.629984	0.0644059	0.565578	1073.85	Bd1-1vsBd3-1	CG
Bd1	42510300	42511011	712	58	0.179675	0.768081	-0.588406	-1073.22	Bd1-1vsBd3-1	CG
Bd1	51467077	51468042	966	62	0.0921243	0.605044	-0.51292	-1070.44	Bd1-1vsBd3-1	CG
Bd1	53324458	53325226	769	46	0.794613	0.12801	0.666603	1069.45	Bd1-1vsBd3-1	CG
Bd1	7086090	7086574	485	59	0.292481	0.643157	-0.350676	-1069.16	Bd1-1vsBd3-1	CG
Bd1	54225864	54226279	416	72	0.356451	0.0386316	0.317819	1068.62	Bd1-1vsBd3-1	CG
Bd1	62615341	62615961	621	96	0.790474	0.421113	0.369362	1067.23	Bd1-1vsBd3-1	CG
Bd1	13670919	13671503	585	68	0.856581	0.426981	0.429601	1067.04	Bd1-1vsBd3-1	CG
Bd1	15448446	15449019	574	42	0.961127	0.345375	0.615752	1066.75	Bd1-1vsBd3-1	CG
Bd1	46108421	46109602	1182	62	0.84762	0.161378	0.686242	1066.1	Bd1-1vsBd3-1	CG
Bd1	6102956	6103428	473	77	0.824951	0.475939	0.349012	1065.94	Bd1-1vsBd3-1	CG
Bd1	66797899	66798556	658	71	0.0871586	0.557099	-0.46994	-1065.69	Bd1-1vsBd3-1	CG
Bd1	50143725	50144615	891	116	0.968875	0.605901	0.362974	1065.37	Bd1-1vsBd3-1	CG
Bd1	28313955	28314623	669	38	0.137452	0.890469	-0.753017	-1063.08	Bd1-1vsBd3-1	CG
Bd1	32715513	32715868	356	54	0.210283	0.547335	-0.337053	-1062.79	Bd1-1vsBd3-1	CG
Bd1	17452349	17453221	873	69	0.316105	0.817313	-0.501209	-1062.47	Bd1-1vsBd3-1	CG
Bd1	48372484	48372824	341	60	0.660936	0.159524	0.501412	1061.37	Bd1-1vsBd3-1	CG
Bd1	35045622	35046157	536	66	0.395058	0.0328782	0.36218	1061.32	Bd1-1vsBd3-1	CG
Bd1	3200922	3201653	732	58	0.802169	0.299669	0.502501	1060.56	Bd1-1vsBd3-1	CG
Bd1	2958383	2959050	668	56	0.148271	0.769469	-0.621198	-1059.93	Bd1-1vsBd3-1	CG
Bd1	15655580	15656160	581	130	0.775405	0.953681	-0.178276	-1059.23	Bd1-1vsBd3-1	CG
Bd1	63653297	63653632	336	72	0.0229743	0.169373	-0.146399	-1058.16	Bd1-1vsBd3-1	CG
Bd1	9962	10733	772	62	0.935597	0.205587	0.730009	1058.12	Bd1-1vsBd3-1	CG
Bd1	63549179	63549836	658	44	0.769005	0.119664	0.649341	1057.03	Bd1-1vsBd3-1	CG
Bd1	29771988	29772591	604	63	0.325794	0.865795	-0.54	-1056.75	Bd1-1vsBd3-1	CG
Bd1	41561615	41562400	786	136	0.755159	0.960055	-0.204896	-1054.77	Bd1-1vsBd3-1	CG
Bd1	61675571	61676508	938	57	0.0791496	0.605507	-0.526357	-1054.05	Bd1-1vsBd3-1	CG
Bd1	48229177	48229606	430	88	0.265607	0.459664	-0.194057	-1053.28	Bd1-1vsBd3-1	CG
Bd1	69669887	69670635	749	76	0.950435	0.628486	0.321949	1051.88	Bd1-1vsBd3-1	CG
Bd1	50931699	50932231	533	42	0.77681	0.169778	0.607033	1051.36	Bd1-1vsBd3-1	CG
Bd1	57896506	57896906	401	76	0.0325614	0.281196	-0.248635	-1051.3	Bd1-1vsBd3-1	CG
Bd1	40277233	40278081	849	64	0.26318	0.773263	-0.510083	-1051.19	Bd1-1vsBd3-1	CG
Bd1	1277212	1277677	466	49	0.0629797	0.594783	-0.531803	-1050.49	Bd1-1vsBd3-1	CG
Bd1	67747115	67747672	558	48	0.172595	0.793931	-0.621336	-1049.18	Bd1-1vsBd3-1	CG
Bd1	48942305	48943305	1001	50	0.774055	0.0694203	0.704634	1048.29	Bd1-1vsBd3-1	CG
Bd1	36978039	36978644	606	174	0.684225	0.945808	-0.261583	-1048.12	Bd1-1vsBd3-1	CG
Bd1	18737423	18738262	840	76	0.929209	0.419051	0.510157	1047.38	Bd1-1vsBd3-1	CG
Bd1	854594	855000	407	98	0.408037	0.580407	-0.172369	-1047.35	Bd1-1vsBd3-1	CG
Bd1	39000425	39001325	901	159	0.732909	0.95967	-0.22676	-1047.28	Bd1-1vsBd3-1	CG
Bd1	55954249	55954909	661	52	0.39047	0.869793	-0.479323	-1046.36	Bd1-1vsBd3-1	CG
Bd1	39883831	39884472	642	124	0.780064	0.951075	-0.171011	-1045.98	Bd1-1vsBd3-1	CG
Bd1	67884738	67885509	772	223	0.635471	0.937654	-0.302183	-1042.86	Bd1-1vsBd3-1	CG
Bd1	25129157	25129885	729	43	0.762505	0.0552563	0.707249	1041.93	Bd1-1vsBd3-1	CG
Bd1	72247954	72248421	468	94	0.526142	0.32122	0.204922	1041.45	Bd1-1vsBd3-1	CG
Bd1	36067691	36068603	913	210	0.674625	0.955364	-0.280739	-1040.39	Bd1-1vsBd3-1	CG
Bd1	14061798	14062635	838	164	0.715457	0.947492	-0.232035	-1040.06	Bd1-1vsBd3-1	CG
Bd1	65256723	65257184	462	59	0.366199	0.0482895	0.31791	1037.94	Bd1-1vsBd3-1	CG
Bd1	42587315	42588049	735	33	0.90814	0.11111	0.797031	1037.25	Bd1-1vsBd3-1	CG
Bd1	22222743	22223414	672	56	0.611349	0.0612711	0.550078	1035.76	Bd1-1vsBd3-1	CG
Bd1	1971573	1972204	632	59	0.115784	0.730667	-0.614883	-1035.58	Bd1-1vsBd3-1	CG
Bd1	41970850	41971525	676	140	0.701002	0.946989	-0.245987	-1035.48	Bd1-1vsBd3-1	CG
Bd1	52637560	52638155	596	52	0.655315	0.067534	0.587781	1035.44	Bd1-1vsBd3-1	CG
Bd1	55304198	55304950	753	46	0.865971	0.206567	0.659404	1035.42	Bd1-1vsBd3-1	CG
Bd1	41600277	41600870	594	50	0.194975	0.750019	-0.555044	-1034.22	Bd1-1vsBd3-1	CG
Bd1	14707549	14708043	495	87	0.343967	0.552538	-0.208571	-1033.84	Bd1-1vsBd3-1	CG
Bd1	33811847	33812526	680	62	0.567914	0.0892256	0.478688	1033.6	Bd1-1vsBd3-1	CG
Bd1	47325019	47326539	1521	88	0.172751	0.609444	-0.436693	-1033.08	Bd1-1vsBd3-1	CG
Bd1	46494508	46496192	1685	75	0.170967	0.672227	-0.501259	-1032.53	Bd1-1vsBd3-1	CG
Bd1	40271269	40271750	482	76	0.12268	0.647228	-0.524548	-1032.25	Bd1-1vsBd3-1	CG
Bd1	18325224	18325707	484	60	0.779755	0.339187	0.440567	1030.42	Bd1-1vsBd3-1	CG
Bd1	17866345	17867101	757	163	0.949827	0.709348	0.240478	1030.04	Bd1-1vsBd3-1	CG
Bd1	22399341	22399960	620	40	0.169862	0.858491	-0.688629	-1029.36	Bd1-1vsBd3-1	CG
Bd1	16974665	16975528	864	76	0.0734683	0.498065	-0.424597	-1028.83	Bd1-1vsBd3-1	CG
Bd1	1539765	1540672	908	50	0.0998533	0.755325	-0.655472	-1028.19	Bd1-1vsBd3-1	CG
Bd1	20730562	20731307	746	211	0.612218	0.944365	-0.332147	-1027.76	Bd1-1vsBd3-1	CG
Bd1	25447582	25448171	590	56	0.203454	0.675189	-0.471735	-1027.51	Bd1-1vsBd3-1	CG
Bd1	30896793	30898033	1241	206	0.962847	0.646238	0.316609	1026.98	Bd1-1vsBd3-1	CG
Bd1	30907702	30908719	1018	106	0.920306	0.456211	0.464096	1026.59	Bd1-1vsBd3-1	CG
Bd1	27872630	27875237	2608	86	0.747379	0.220867	0.526512	1025.6	Bd1-1vsBd3-1	CG
Bd1	54807123	54807739	617	50	0.101078	0.641312	-0.540234	-1025.08	Bd1-1vsBd3-1	CG
Bd1	16004569	16005141	573	62	0.0960719	0.492555	-0.396483	-1024.23	Bd1-1vsBd3-1	CG
Bd1	52825119	52825499	381	74	0.375336	0.150785	0.224551	1024.11	Bd1-1vsBd3-1	CG
Bd1	38979082	38979712	631	181	0.639751	0.941817	-0.302066	-1023.29	Bd1-1vsBd3-1	CG
Bd1	36950772	36951631	860	152	0.696579	0.951544	-0.254965	-1022.94	Bd1-1vsBd3-1	CG
Bd1	34884548	34884874	327	88	0.0270352	0.165036	-0.138001	-1019.12	Bd1-1vsBd3-1	CG
Bd1	32826752	32827397	646	58	0.872488	0.357488	0.515	1016.7	Bd1-1vsBd3-1	CG
Bd1	67670270	67670824	555	37	0.100299	0.810958	-0.710659	-1015.36	Bd1-1vsBd3-1	CG
Bd1	73909105	73909676	572	74	0.0861074	0.409212	-0.323105	-1015.25	Bd1-1vsBd3-1	CG
Bd1	56282765	56283441	677	66	0.092848	0.459619	-0.366771	-1014.36	Bd1-1vsBd3-1	CG
Bd1	74556370	74556919	550	44	0.189726	0.790201	-0.600475	-1012.09	Bd1-1vsBd3-1	CG
Bd1	57144859	57145946	1088	74	0.723435	0.19812	0.525315	1010.63	Bd1-1vsBd3-1	CG
Bd1	61788883	61789646	764	84	0.3038	0.761377	-0.457577	-1010.48	Bd1-1vsBd3-1	CG
Bd1	41967273	41968405	1133	166	0.722616	0.953218	-0.230602	-1010.19	Bd1-1vsBd3-1	CG
Bd1	14564808	14565303	496	52	0.422654	0.062729	0.359925	1010.16	Bd1-1vsBd3-1	CG
Bd1	19966217	19966840	624	48	0.64943	0.0743936	0.575037	1009.3	Bd1-1vsBd3-1	CG
Bd1	55470323	55470763	441	126	0.690907	0.950824	-0.259917	-1008.49	Bd1-1vsBd3-1	CG
Bd1	23730056	23730756	701	172	0.719219	0.946727	-0.227508	-1008.16	Bd1-1vsBd3-1	CG
Bd1	2419580	2420322	743	60	0.784106	0.209266	0.574841	1007.38	Bd1-1vsBd3-1	CG
Bd1	74005413	74006162	750	70	0.182721	0.571217	-0.388496	-1003.32	Bd1-1vsBd3-1	CG
Bd1	37246462	37247175	714	199	0.628078	0.939044	-0.310966	-1003.32	Bd1-1vsBd3-1	CG
Bd1	54539133	54539693	561	49	0.702432	0.0614465	0.640986	999.955	Bd1-1vsBd3-1	CG
Bd1	41132108	41132780	673	118	0.704254	0.962751	-0.258497	-998.732	Bd1-1vsBd3-1	CG
Bd1	58178334	58178739	406	82	0.520651	0.704314	-0.183663	-997.655	Bd1-1vsBd3-1	CG
Bd1	13958920	13959660	741	81	0.420274	0.810665	-0.390391	-995.376	Bd1-1vsBd3-1	CG
Bd1	26171859	26172489	631	72	0.0796006	0.52354	-0.44394	-994.704	Bd1-1vsBd3-1	CG
Bd1	2167790	2168221	432	68	0.0232874	0.22915	-0.205862	-993.115	Bd1-1vsBd3-1	CG
Bd1	11713241	11713728	488	90	0.399033	0.663294	-0.26426	-992.295	Bd1-1vsBd3-1	CG
Bd1	32196074	32196498	425	74	0.0999267	0.266864	-0.166937	-991.338	Bd1-1vsBd3-1	CG
Bd1	7553968	7555053	1086	63	0.872943	0.246136	0.626807	991.278	Bd1-1vsBd3-1	CG
Bd1	14427057	14427793	737	76	0.102244	0.409945	-0.307702	-991.273	Bd1-1vsBd3-1	CG
Bd1	19165901	19166461	561	40	0.0874833	0.745372	-0.657888	-989.914	Bd1-1vsBd3-1	CG
Bd1	57801329	57801586	258	96	0.851431	0.630569	0.220862	989.149	Bd1-1vsBd3-1	CG
Bd1	16266101	16266494	394	100	0.320893	0.553065	-0.232172	-988.179	Bd1-1vsBd3-1	CG
Bd1	39986319	39987425	1107	106	0.709339	0.301341	0.407998	987.814	Bd1-1vsBd3-1	CG
Bd1	41559679	41560235	557	128	0.711774	0.951234	-0.23946	-987.307	Bd1-1vsBd3-1	CG
Bd1	46223062	46223701	640	76	0.154027	0.561612	-0.407586	-987.216	Bd1-1vsBd3-1	CG
Bd1	59064825	59065443	619	58	0.566873	0.0500094	0.516864	987.098	Bd1-1vsBd3-1	CG
Bd1	21973857	21974395	539	45	0.197727	0.878243	-0.680516	-986.485	Bd1-1vsBd3-1	CG
Bd1	48432416	48433205	790	166	0.947247	0.728607	0.21864	986.286	Bd1-1vsBd3-1	CG
Bd1	36908871	36909631	761	156	0.719008	0.956848	-0.23784	-985.807	Bd1-1vsBd3-1	CG
Bd1	4152351	4152957	607	58	0.545579	0.156583	0.388996	985.17	Bd1-1vsBd3-1	CG
Bd1	17828234	17829266	1033	164	0.960572	0.600378	0.360194	984.126	Bd1-1vsBd3-1	CG
Bd1	45490969	45491277	309	54	0.184497	0.467378	-0.282881	-980.64	Bd1-1vsBd3-1	CG
Bd1	61882350	61883206	857	63	0.899571	0.372648	0.526923	980.388	Bd1-1vsBd3-1	CG
Bd1	22185243	22185890	648	66	0.959408	0.511361	0.448047	980.346	Bd1-1vsBd3-1	CG
Bd1	22123694	22124587	894	49	0.940411	0.229814	0.710597	980.038	Bd1-1vsBd3-1	CG
Bd1	48442948	48444239	1292	232	0.951252	0.633858	0.317394	979.971	Bd1-1vsBd3-1	CG
Bd1	25797786	25798274	489	84	0.312784	0.0669677	0.245816	979.614	Bd1-1vsBd3-1	CG
Bd1	61731225	61731619	395	59	0.767725	0.28325	0.484475	979.02	Bd1-1vsBd3-1	CG
Bd1	57170117	57170726	610	72	0.0635054	0.39779	-0.334284	-976.713	Bd1-1vsBd3-1	CG
Bd1	54856056	54856499	444	58	0.327654	0.631824	-0.30417	-975.936	Bd1-1vsBd3-1	CG
Bd1	9911817	9912194	378	52	0.735657	0.340282	0.395375	975.882	Bd1-1vsBd3-1	CG
Bd1	35215587	35216429	843	60	0.208616	0.643791	-0.435175	-975.447	Bd1-1vsBd3-1	CG
Bd1	69147569	69148243	675	136	0.690979	0.956107	-0.265127	-974.102	Bd1-1vsBd3-1	CG
Bd1	36055165	36056077	913	172	0.695951	0.962152	-0.266202	-973.131	Bd1-1vsBd3-1	CG
Bd1	27048049	27048701	653	90	0.6364	0.863415	-0.227015	-973.111	Bd1-1vsBd3-1	CG
Bd1	36572456	36573297	842	164	0.728998	0.955703	-0.226706	-972.141	Bd1-1vsBd3-1	CG
Bd1	52193817	52194314	498	142	0.623136	0.949849	-0.326713	-971.739	Bd1-1vsBd3-1	CG
Bd1	43866939	43867591	653	99	0.620166	0.407138	0.213028	971.24	Bd1-1vsBd3-1	CG
Bd1	37169730	37170164	435	104	0.685108	0.950663	-0.265556	-971.017	Bd1-1vsBd3-1	CG
Bd1	21220382	21221124	743	70	0.288233	0.778924	-0.490691	-970.966	Bd1-1vsBd3-1	CG
Bd1	48550879	48552178	1300	62	0.247952	0.92079	-0.672838	-970.641	Bd1-1vsBd3-1	CG
Bd1	37663496	37664186	691	29	0.054864	0.848858	-0.793994	-969.83	Bd1-1vsBd3-1	CG
Bd1	3109301	3110008	708	64	0.718618	0.298684	0.419934	968.964	Bd1-1vsBd3-1	CG
Bd1	43206280	43206884	605	44	0.143667	0.794652	-0.650985	-963.866	Bd1-1vsBd3-1	CG
Bd1	6414118	6414588	471	104	0.767974	0.958053	-0.19008	-963.767	Bd1-1vsBd3-1	CG
Bd1	42080352	42080863	512	95	0.801364	0.961815	-0.160451	-963.523	Bd1-1vsBd3-1	CG
Bd1	17520218	17520734	517	44	0.592909	0.0571359	0.535773	961.751	Bd1-1vsBd3-1	CG
Bd1	59322177	59322835	659	48	0.48658	0.95399	-0.46741	-961.018	Bd1-1vsBd3-1	CG
Bd1	15669105	15669697	593	136	0.720977	0.952827	-0.23185	-960.521	Bd1-1vsBd3-1	CG
Bd1	3452456	3454995	2540	78	0.161359	0.736648	-0.575289	-959.84	Bd1-1vsBd3-1	CG
Bd1	45224553	45225146	594	52	0.956661	0.436993	0.519668	959.554	Bd1-1vsBd3-1	CG
Bd1	20256918	20257273	356	72	0.24281	0.559655	-0.316845	-959.499	Bd1-1vsBd3-1	CG
Bd1	20641452	20643088	1637	56	0.224124	0.875347	-0.651223	-958.785	Bd1-1vsBd3-1	CG
Bd1	33053872	33054881	1010	70	0.837088	0.409303	0.427785	958.1	Bd1-1vsBd3-1	CG
Bd1	25207552	25208785	1234	96	0.80588	0.347633	0.458246	958.014	Bd1-1vsBd3-1	CG
Bd1	66637939	66638500	562	66	0.438645	0.132481	0.306164	958.007	Bd1-1vsBd3-1	CG
Bd1	34350623	34351732	1110	42	0.329229	0.950384	-0.621155	-957.868	Bd1-1vsBd3-1	CG
Bd1	36072996	36073853	858	142	0.670197	0.955882	-0.285685	-957.515	Bd1-1vsBd3-1	CG
Bd1	64389627	64390845	1219	57	0.627269	0.0515402	0.575729	957.016	Bd1-1vsBd3-1	CG
Bd1	64259296	64259831	536	52	0.916491	0.462825	0.453666	956.337	Bd1-1vsBd3-1	CG
Bd1	20725943	20726659	717	158	0.70207	0.95056	-0.24849	-956.074	Bd1-1vsBd3-1	CG
Bd1	43934846	43935965	1120	74	0.944569	0.541994	0.402574	955.405	Bd1-1vsBd3-1	CG
Bd1	6451252	6452017	766	40	0.0603657	0.800362	-0.739996	-952.153	Bd1-1vsBd3-1	CG
Bd1	20690233	20690876	644	138	0.680539	0.951044	-0.270505	-951.341	Bd1-1vsBd3-1	CG
Bd1	3585562	3586709	1148	55	0.820594	0.163804	0.656791	951.196	Bd1-1vsBd3-1	CG
Bd1	47953309	47953788	480	84	0.0292474	0.212466	-0.183219	-951.004	Bd1-1vsBd3-1	CG
Bd1	70803949	70804978	1030	79	0.775745	0.340675	0.435071	950.811	Bd1-1vsBd3-1	CG
Bd1	52104848	52105498	651	62	0.466794	0.960895	-0.4941	-948.99	Bd1-1vsBd3-1	CG
Bd1	39880095	39880595	501	80	0.778924	0.956656	-0.177732	-948.315	Bd1-1vsBd3-1	CG
Bd1	14875886	14876522	637	42	0.677261	0.0782285	0.599032	948.244	Bd1-1vsBd3-1	CG
Bd1	13420268	13420797	530	84	0.38077	0.596459	-0.215688	-947.589	Bd1-1vsBd3-1	CG
Bd1	9282284	9282961	678	37	0.800708	0.133368	0.667341	947.218	Bd1-1vsBd3-1	CG
Bd1	58557054	58557538	485	54	0.0449932	0.408317	-0.363324	-946.107	Bd1-1vsBd3-1	CG
Bd1	36737654	36738101	448	136	0.718923	0.931027	-0.212103	-944.66	Bd1-1vsBd3-1	CG
Bd1	24808861	24809299	439	72	0.316731	0.671975	-0.355244	-944.378	Bd1-1vsBd3-1	CG
Bd1	26770214	26770806	593	62	0.701405	0.296088	0.405317	943.774	Bd1-1vsBd3-1	CG
Bd1	68716499	68717124	626	40	0.143795	0.805491	-0.661697	-942.367	Bd1-1vsBd3-1	CG
Bd1	67820898	67821328	431	82	0.206246	0.386394	-0.180148	-940.995	Bd1-1vsBd3-1	CG
Bd1	14703706	14704196	491	96	0.527018	0.696843	-0.169825	-939.973	Bd1-1vsBd3-1	CG
Bd1	41609993	41610651	659	74	0.383599	0.737019	-0.35342	-939.392	Bd1-1vsBd3-1	CG
Bd1	30304468	30305082	615	59	0.0852062	0.605802	-0.520595	-938.603	Bd1-1vsBd3-1	CG
Bd1	36497530	36498137	608	167	0.536744	0.84148	-0.304736	-938.381	Bd1-1vsBd3-1	CG
Bd1	56088818	56089408	591	66	0.261287	0.917705	-0.656418	-938.249	Bd1-1vsBd3-1	CG
Bd1	48665710	48666235	526	66	0.0543248	0.37106	-0.316735	-937.285	Bd1-1vsBd3-1	CG
Bd1	58283316	58283988	673	52	0.703053	0.0892628	0.613791	936.897	Bd1-1vsBd3-1	CG
Bd1	55240219	55241028	810	64	0.832626	0.270278	0.562348	936.306	Bd1-1vsBd3-1	CG
Bd1	11068708	11069784	1077	86	0.854105	0.478784	0.375321	935.537	Bd1-1vsBd3-1	CG
Bd1	57757530	57758247	718	158	0.956299	0.626383	0.329916	934.597	Bd1-1vsBd3-1	CG
Bd1	976904	977467	564	58	0.221031	0.715769	-0.494738	-934.568	Bd1-1vsBd3-1	CG
Bd1	40305725	40306222	498	110	0.973299	0.748235	0.225064	932.982	Bd1-1vsBd3-1	CG
Bd1	67493198	67493914	717	108	0.649298	0.399023	0.250275	932.787	Bd1-1vsBd3-1	CG
Bd1	50155183	50155837	655	54	0.0689762	0.581731	-0.512755	-932.527	Bd1-1vsBd3-1	CG
Bd1	9747799	9748484	686	71	0.182429	0.609297	-0.426868	-931.745	Bd1-1vsBd3-1	CG
Bd1	72963677	72964643	967	62	0.871856	0.438133	0.433723	931.005	Bd1-1vsBd3-1	CG
Bd1	17196921	17197448	528	58	0.753688	0.350981	0.402707	930.665	Bd1-1vsBd3-1	CG
Bd1	73830986	73831400	415	68	0.303958	0.0924724	0.211486	929.847	Bd1-1vsBd3-1	CG
Bd1	36357274	36357884	611	155	0.699486	0.937031	-0.237545	-929.364	Bd1-1vsBd3-1	CG
Bd1	48441850	48442440	591	137	0.955739	0.68109	0.27465	929.319	Bd1-1vsBd3-1	CG
Bd1	28228528	28229042	515	32	0.864124	0.230516	0.633608	928.971	Bd1-1vsBd3-1	CG
Bd1	28221078	28221554	477	84	0.673994	0.884215	-0.210221	-927.796	Bd1-1vsBd3-1	CG
Bd1	54840481	54841075	595	65	0.677976	0.32788	0.350097	926.792	Bd1-1vsBd3-1	CG
Bd1	33049555	33050067	513	60	0.40096	0.0668167	0.334143	925.937	Bd1-1vsBd3-1	CG
Bd1	36262238	36263114	877	198	0.604842	0.951318	-0.346476	-925.121	Bd1-1vsBd3-1	CG
Bd1	42058368	42058940	573	128	0.784248	0.954262	-0.170014	-924.663	Bd1-1vsBd3-1	CG
Bd1	35383282	35384153	872	140	0.72836	0.964075	-0.235714	-924.42	Bd1-1vsBd3-1	CG
Bd1	48436966	48438069	1104	196	0.939233	0.65561	0.283623	924.393	Bd1-1vsBd3-1	CG
Bd1	26841552	26842346	795	89	0.494212	0.783212	-0.289	-920.535	Bd1-1vsBd3-1	CG
Bd1	20695971	20696531	561	100	0.745248	0.956488	-0.21124	-920.193	Bd1-1vsBd3-1	CG
Bd1	40205158	40205648	491	82	0.972247	0.755916	0.216331	920.078	Bd1-1vsBd3-1	CG
Bd1	36254318	36254860	543	49	0.773411	0.354988	0.418424	919.486	Bd1-1vsBd3-1	CG
Bd1	40880359	40881801	1443	70	0.638046	0.0982259	0.53982	918.967	Bd1-1vsBd3-1	CG
Bd1	6285543	6286257	715	44	0.200096	0.805364	-0.605268	-918.554	Bd1-1vsBd3-1	CG
Bd1	57172369	57173025	657	48	0.145103	0.602076	-0.456973	-918.269	Bd1-1vsBd3-1	CG
Bd1	6810186	6810467	282	40	0.107864	0.472338	-0.364475	-918.167	Bd1-1vsBd3-1	CG
Bd1	56008688	56009521	834	190	0.630517	0.95319	-0.322672	-918.162	Bd1-1vsBd3-1	CG
Bd1	4390623	4391088	466	55	0.150336	0.492283	-0.341947	-918.155	Bd1-1vsBd3-1	CG
Bd1	26791919	26792270	352	42	0.177245	0.639877	-0.462632	-917.802	Bd1-1vsBd3-1	CG
Bd1	39719864	39720260	397	78	0.277417	0.518955	-0.241538	-916.469	Bd1-1vsBd3-1	CG
Bd1	54002810	54003307	498	48	0.748415	0.128546	0.619869	916.419	Bd1-1vsBd3-1	CG
Bd1	11523580	11524104	525	63	0.528329	0.125994	0.402335	915.451	Bd1-1vsBd3-1	CG
Bd1	57000769	57001693	925	160	0.939783	0.717254	0.222529	914.718	Bd1-1vsBd3-1	CG
Bd1	22032292	22032564	273	45	0.606505	0.313961	0.292544	912.891	Bd1-1vsBd3-1	CG
Bd1	22318607	22319148	542	60	0.330609	0.782799	-0.45219	-912.725	Bd1-1vsBd3-1	CG
Bd1	11539562	11540316	755	181	0.682631	0.934606	-0.251975	-912.223	Bd1-1vsBd3-1	CG
Bd1	26775502	26775936	435	148	0.669978	0.913176	-0.243198	-911.976	Bd1-1vsBd3-1	CG
Bd1	68721311	68721917	607	62	0.858137	0.208978	0.649159	911.388	Bd1-1vsBd3-1	CG
Bd1	8796061	8796695	635	60	0.777448	0.275247	0.502201	911.274	Bd1-1vsBd3-1	CG
Bd1	14075601	14076257	657	118	0.770023	0.960337	-0.190314	-910.513	Bd1-1vsBd3-1	CG
Bd1	38493969	38494539	571	134	0.758729	0.952418	-0.19369	-910.202	Bd1-1vsBd3-1	CG
Bd1	47367806	47368524	719	100	0.573514	0.774037	-0.200523	-910.185	Bd1-1vsBd3-1	CG
Bd1	58960179	58960651	473	66	0.786605	0.467049	0.319556	909.575	Bd1-1vsBd3-1	CG
Bd1	31042330	31042767	438	117	0.950526	0.692423	0.258104	909.411	Bd1-1vsBd3-1	CG
Bd1	70583847	70584362	516	51	0.505269	0.116115	0.389154	908.952	Bd1-1vsBd3-1	CG
Bd1	61874642	61875231	590	40	0.890105	0.244604	0.645501	908.433	Bd1-1vsBd3-1	CG
Bd1	58334304	58335210	907	68	0.160629	0.427107	-0.266478	-907.926	Bd1-1vsBd3-1	CG
Bd1	28536594	28536907	314	92	0.803614	0.948818	-0.145204	-907.69	Bd1-1vsBd3-1	CG
Bd1	69198260	69198858	599	50	0.059732	0.628019	-0.568287	-906.872	Bd1-1vsBd3-1	CG
Bd1	37270373	37271154	782	212	0.583473	0.945974	-0.362501	-906.119	Bd1-1vsBd3-1	CG
Bd1	55187648	55188143	496	65	0.364103	0.0734024	0.2907	905.921	Bd1-1vsBd3-1	CG
Bd1	15456639	15456973	335	71	0.361559	0.570735	-0.209176	-905.758	Bd1-1vsBd3-1	CG
Bd1	55098329	55098728	400	68	0.447709	0.135218	0.312491	905.643	Bd1-1vsBd3-1	CG
Bd1	6265802	6266257	456	76	0.108598	0.293533	-0.184935	-905.21	Bd1-1vsBd3-1	CG
Bd1	47027019	47027771	753	54	0.940588	0.412758	0.52783	905.075	Bd1-1vsBd3-1	CG
Bd1	20601353	20601837	485	49	0.567118	0.0576783	0.509439	903.867	Bd1-1vsBd3-1	CG
Bd1	24236260	24237086	827	66	0.627874	0.0391334	0.588741	903.735	Bd1-1vsBd3-1	CG
Bd1	48085772	48086291	520	84	0.68582	0.954827	-0.269007	-903.543	Bd1-1vsBd3-1	CG
Bd1	31015301	31015692	392	110	0.944005	0.721536	0.22247	901.795	Bd1-1vsBd3-1	CG
Bd1	56748180	56749017	838	62	0.0940652	0.557295	-0.46323	-898.909	Bd1-1vsBd3-1	CG
Bd1	69556476	69556989	514	41	0.88732	0.137148	0.750172	898.407	Bd1-1vsBd3-1	CG
Bd1	24099201	24099723	523	56	0.401373	0.04951	0.351863	898.162	Bd1-1vsBd3-1	CG
Bd1	19641922	19642454	533	110	0.703457	0.949083	-0.245626	-897.915	Bd1-1vsBd3-1	CG
Bd1	60134275	60135091	817	56	0.871677	0.336871	0.534805	895.501	Bd1-1vsBd3-1	CG
Bd1	52317896	52318998	1103	132	0.447447	0.284524	0.162923	894.888	Bd1-1vsBd3-1	CG
Bd1	41236306	41237146	841	116	0.659984	0.956954	-0.29697	-894.685	Bd1-1vsBd3-1	CG
Bd1	50182569	50183036	468	64	0.0268952	0.242341	-0.215446	-894.2	Bd1-1vsBd3-1	CG
Bd1	46896198	46896684	487	48	0.215517	0.762629	-0.547112	-893.985	Bd1-1vsBd3-1	CG
Bd1	67954000	67954372	373	71	0.102875	0.265748	-0.162873	-893.776	Bd1-1vsBd3-1	CG
Bd1	62065012	62065297	286	46	0.269436	0.554225	-0.284789	-893.74	Bd1-1vsBd3-1	CG
Bd1	57193315	57194866	1552	72	0.706335	0.235911	0.470424	892.371	Bd1-1vsBd3-1	CG
Bd1	67387477	67388332	856	41	0.1248	0.688967	-0.564167	-892.032	Bd1-1vsBd3-1	CG
Bd1	64749944	64750343	400	53	0.0915937	0.533523	-0.441929	-891.6	Bd1-1vsBd3-1	CG
Bd1	50987656	50988977	1322	56	0.908191	0.241771	0.666421	890.087	Bd1-1vsBd3-1	CG
Bd1	50735075	50736383	1309	74	0.509328	0.112438	0.39689	890.064	Bd1-1vsBd3-1	CG
Bd1	19289631	19290821	1191	170	0.469462	0.91039	-0.440928	-889.867	Bd1-1vsBd3-1	CG
Bd1	17670025	17670601	577	138	0.769544	0.96481	-0.195266	-889.461	Bd1-1vsBd3-1	CG
Bd1	59727807	59728327	521	72	0.050137	0.278344	-0.228207	-889.381	Bd1-1vsBd3-1	CG
Bd1	54279927	54280358	432	42	0.293423	0.907374	-0.613951	-888.582	Bd1-1vsBd3-1	CG
Bd1	72234312	72235779	1468	147	0.602763	0.942335	-0.339571	-888.536	Bd1-1vsBd3-1	CG
Bd1	49960648	49961109	462	90	0.621089	0.395304	0.225785	888.026	Bd1-1vsBd3-1	CG
Bd1	11890069	11890383	315	68	0.203112	0.419679	-0.216567	-887.979	Bd1-1vsBd3-1	CG
Bd1	57384934	57385996	1063	208	0.955987	0.58315	0.372837	887.775	Bd1-1vsBd3-1	CG
Bd1	138926	139552	627	60	0.810848	0.419777	0.391072	887.415	Bd1-1vsBd3-1	CG
Bd1	63849227	63849895	669	43	0.0771086	0.678852	-0.601743	-887.4	Bd1-1vsBd3-1	CG
Bd1	43673934	43674470	537	50	0.516053	0.215402	0.300651	887.315	Bd1-1vsBd3-1	CG
Bd1	41569977	41571147	1171	174	0.685877	0.940925	-0.255048	-886.424	Bd1-1vsBd3-1	CG
Bd1	31024235	31025298	1064	187	0.947754	0.663428	0.284326	885.507	Bd1-1vsBd3-1	CG
Bd1	67725639	67726108	470	57	0.262041	0.664896	-0.402855	-882.336	Bd1-1vsBd3-1	CG
Bd1	56540230	56540719	490	42	0.278981	0.938912	-0.65993	-881.781	Bd1-1vsBd3-1	CG
Bd1	21775910	21776436	527	97	0.742811	0.954799	-0.211988	-880.577	Bd1-1vsBd3-1	CG
Bd1	59928544	59929169	626	156	0.622349	0.941274	-0.318925	-880.538	Bd1-1vsBd3-1	CG
Bd1	58159489	58160350	862	80	0.743311	0.357491	0.385821	880.299	Bd1-1vsBd3-1	CG
Bd1	55952576	55953915	1340	56	0.0902627	0.725758	-0.635495	-878.64	Bd1-1vsBd3-1	CG
Bd1	39896227	39896636	410	108	0.772775	0.941593	-0.168818	-877.524	Bd1-1vsBd3-1	CG
Bd1	74393534	74394163	630	40	0.0358547	0.599104	-0.563249	-877.156	Bd1-1vsBd3-1	CG
Bd1	18051458	18051751	294	52	0.690796	0.384359	0.306437	875.536	Bd1-1vsBd3-1	CG
Bd1	35328811	35329285	475	125	0.636585	0.91411	-0.277525	-875.396	Bd1-1vsBd3-1	CG
Bd1	27305326	27305739	414	52	0.114801	0.53023	-0.41543	-875.355	Bd1-1vsBd3-1	CG
Bd1	42514158	42514930	773	97	0.353504	0.82675	-0.473246	-874.565	Bd1-1vsBd3-1	CG
Bd1	8087422	8088196	775	61	0.114975	0.588119	-0.473144	-874.141	Bd1-1vsBd3-1	CG
Bd1	67938156	67938625	470	68	0.172572	0.6015	-0.428928	-874.106	Bd1-1vsBd3-1	CG
Bd1	17171225	17171842	618	45	0.556837	0.0626346	0.494203	873.385	Bd1-1vsBd3-1	CG
Bd1	29263398	29264262	865	143	0.714666	0.960658	-0.245992	-872.948	Bd1-1vsBd3-1	CG
Bd1	49022496	49023293	798	120	0.953966	0.742932	0.211034	870.583	Bd1-1vsBd3-1	CG
Bd1	19083836	19084436	601	28	0.117777	0.906185	-0.788408	-868.649	Bd1-1vsBd3-1	CG
Bd1	57404377	57404948	572	46	0.636399	0.141817	0.494582	866.372	Bd1-1vsBd3-1	CG
Bd1	33432856	33433326	471	98	0.718027	0.959824	-0.241797	-865.813	Bd1-1vsBd3-1	CG
Bd1	74049088	74050369	1282	93	0.367379	0.686138	-0.318759	-865.609	Bd1-1vsBd3-1	CG
Bd1	60066299	60066931	633	52	0.709632	0.367918	0.341714	864.871	Bd1-1vsBd3-1	CG
Bd1	56055545	56055975	431	52	0.13206	0.608917	-0.476858	-864.05	Bd1-1vsBd3-1	CG
Bd1	62965925	62966388	464	54	0.963691	0.507108	0.456582	863.327	Bd1-1vsBd3-1	CG
Bd1	53459774	53460920	1147	64	0.550666	0.101141	0.449525	863.067	Bd1-1vsBd3-1	CG
Bd1	69151566	69152123	558	105	0.780537	0.962025	-0.181488	-861.607	Bd1-1vsBd3-1	CG
Bd1	28656659	28657279	621	45	0.0387662	0.609948	-0.571182	-861.17	Bd1-1vsBd3-1	CG
Bd1	4613156	4614196	1041	66	0.151574	0.627702	-0.476128	-860.871	Bd1-1vsBd3-1	CG
Bd1	57846524	57847334	811	154	0.964873	0.712912	0.251961	860.542	Bd1-1vsBd3-1	CG
Bd1	67338758	67339467	710	48	0.650657	0.111785	0.538872	860.52	Bd1-1vsBd3-1	CG
Bd1	2856041	2856594	554	109	0.735525	0.961799	-0.226273	-860.364	Bd1-1vsBd3-1	CG
Bd1	4325218	4325555	338	38	0.819504	0.133609	0.685895	860.109	Bd1-1vsBd3-1	CG
Bd1	4521690	4522423	734	60	0.248797	0.657846	-0.40905	-858.668	Bd1-1vsBd3-1	CG
Bd1	19609083	19609332	250	40	0.0894236	0.548985	-0.459562	-857.824	Bd1-1vsBd3-1	CG
Bd1	36372326	36372957	632	125	0.750292	0.943829	-0.193537	-857.208	Bd1-1vsBd3-1	CG
Bd1	14341237	14341772	536	61	0.152604	0.639003	-0.486399	-857.154	Bd1-1vsBd3-1	CG
Bd1	56025226	56025870	645	48	0.24397	0.818423	-0.574453	-856.422	Bd1-1vsBd3-1	CG
Bd1	37303068	37303811	744	124	0.677932	0.962137	-0.284205	-854.543	Bd1-1vsBd3-1	CG
Bd1	50087754	50088447	694	88	0.819254	0.482233	0.337021	854.411	Bd1-1vsBd3-1	CG
Bd1	39887200	39887671	472	109	0.736826	0.952197	-0.21537	-853.675	Bd1-1vsBd3-1	CG
Bd1	63790625	63791424	800	108	0.584662	0.387241	0.197421	852.993	Bd1-1vsBd3-1	CG
Bd1	21346447	21347252	806	56	0.877632	0.35899	0.518641	851.046	Bd1-1vsBd3-1	CG
Bd1	41043812	41044410	599	58	0.441597	0.812309	-0.370712	-851.021	Bd1-1vsBd3-1	CG
Bd1	35026397	35026951	555	60	0.544927	0.808644	-0.263717	-850.106	Bd1-1vsBd3-1	CG
Bd1	67377450	67377978	529	98	0.954404	0.771323	0.183081	849.247	Bd1-1vsBd3-1	CG
Bd1	49677097	49677433	337	74	0.352314	0.552918	-0.200604	-848.372	Bd1-1vsBd3-1	CG
Bd1	58395944	58396479	536	73	0.926963	0.688178	0.238785	848.265	Bd1-1vsBd3-1	CG
Bd1	60551258	60551734	477	38	0.890937	0.24574	0.645197	848.029	Bd1-1vsBd3-1	CG
Bd1	34361872	34362442	571	48	0.966208	0.514501	0.451707	847.988	Bd1-1vsBd3-1	CG
Bd1	19697306	19698154	849	142	0.661977	0.965763	-0.303787	-847.984	Bd1-1vsBd3-1	CG
Bd1	42815703	42816189	487	66	0.0295116	0.207654	-0.178143	-846.971	Bd1-1vsBd3-1	CG
Bd1	57599840	57600736	897	208	0.96666	0.596941	0.369719	845.86	Bd1-1vsBd3-1	CG
Bd1	26787351	26788056	706	56	0.105559	0.67796	-0.572401	-845.42	Bd1-1vsBd3-1	CG
Bd1	7296037	7296579	543	44	0.681386	0.126734	0.554652	844.84	Bd1-1vsBd3-1	CG
Bd1	43306403	43307005	603	64	0.546885	0.844791	-0.297906	-843.882	Bd1-1vsBd3-1	CG
Bd1	31016246	31016723	478	104	0.946233	0.788791	0.157442	843.71	Bd1-1vsBd3-1	CG
Bd1	15679033	15679447	415	82	0.758999	0.959347	-0.200349	-843.143	Bd1-1vsBd3-1	CG
Bd1	69152529	69153600	1072	158	0.720911	0.959611	-0.238701	-843.015	Bd1-1vsBd3-1	CG
Bd1	21798779	21799348	570	54	0.580146	0.961244	-0.381099	-841.93	Bd1-1vsBd3-1	CG
Bd1	36366164	36366547	384	83	0.777506	0.96142	-0.183915	-841.124	Bd1-1vsBd3-1	CG
Bd1	51065615	51066173	559	52	0.548488	0.12271	0.425777	841.109	Bd1-1vsBd3-1	CG
Bd1	46440583	46441007	425	44	0.644675	0.235295	0.40938	840.783	Bd1-1vsBd3-1	CG
Bd1	28678302	28678838	537	83	0.570053	0.33777	0.232283	839.888	Bd1-1vsBd3-1	CG
Bd1	10482409	10482873	465	46	0.623099	0.203776	0.419323	838.904	Bd1-1vsBd3-1	CG
[truncated: 237,596+ more rows]
