# Supplementary material for: DNA methylation profiles of diverse Brachypodium distachyon align with underlying genetic diversity
Source: Genome Res. 2016 Nov;26(11):1520–31. doi: 10.1101/gr.205468.116 (PMC5088594; doi:10.1101/gr.205468.116)
Supplement: Supplemental Material [file supp_gr.205468.116_Supplemental_Table_6.xlsx]

## Sheet: Sheet1
Supplemental Table 6: List of Unsmooth DSS DMRs
chrom	start	stop	size	number_c	geno1_methylation	geno2_methylation	methylation_difference (g1-g2)	DSSstat	contrast	context
Bd1	61284153	61286048	1896	405	0.937017	0.0552112	0.881806	6399.42	Bd1-1vsBd3-1	CG
Bd1	50013090	50014869	1780	380	0.087068	0.929809	-0.842741	-5850.55	Bd1-1vsBd3-1	CG
Bd1	23511881	23513954	2074	379	0.0629827	0.895704	-0.832721	-4771.49	Bd1-1vsBd3-1	CG
Bd1	50191519	50192963	1445	272	0.0401865	0.849846	-0.809659	-4522.83	Bd1-1vsBd3-1	CG
Bd1	41680102	41681990	1889	376	0.88232	0.0644075	0.817912	4464.78	Bd1-1vsBd3-1	CG
Bd1	1534523	1535831	1309	264	0.0339281	0.893556	-0.859627	-4207.69	Bd1-1vsBd3-1	CG
Bd1	49387376	49388476	1101	248	0.0530513	0.935649	-0.882598	-3940.75	Bd1-1vsBd3-1	CG
Bd1	27432581	27433899	1319	273	0.0761461	0.941782	-0.865636	-3706.4	Bd1-1vsBd3-1	CG
Bd1	42635058	42636767	1710	238	0.0605766	0.948342	-0.887765	-3633.04	Bd1-1vsBd3-1	CG
Bd1	2307396	2308348	953	208	0.0445288	0.947538	-0.903009	-3558.39	Bd1-1vsBd3-1	CG
Bd1	14050526	14052656	2131	255	0.0559129	0.939211	-0.883298	-3428.17	Bd1-1vsBd3-1	CG
Bd1	20400545	20401656	1112	216	0.0506424	0.940028	-0.889385	-3393.73	Bd1-1vsBd3-1	CG
Bd1	51275023	51275988	966	195	0.0566285	0.958988	-0.90236	-3370.42	Bd1-1vsBd3-1	CG
Bd1	48812204	48813888	1685	268	0.960198	0.106958	0.853239	3104.09	Bd1-1vsBd3-1	CG
Bd1	48231058	48232865	1808	238	0.918335	0.0634253	0.85491	3053.04	Bd1-1vsBd3-1	CG
Bd1	62939621	62940634	1014	183	0.0664452	0.938782	-0.872337	-3018.43	Bd1-1vsBd3-1	CG
Bd1	59956783	59958560	1778	233	0.0935709	0.952832	-0.859261	-2985.19	Bd1-1vsBd3-1	CG
Bd1	741999	743193	1195	194	0.0592962	0.94611	-0.886814	-2922.99	Bd1-1vsBd3-1	CG
Bd1	35840159	35841364	1206	191	0.946859	0.0531017	0.893757	2883.59	Bd1-1vsBd3-1	CG
Bd1	71332048	71332849	802	138	0.051229	0.966268	-0.915038	-2680.98	Bd1-1vsBd3-1	CG
Bd1	20392688	20393867	1180	197	0.943254	0.0699902	0.873263	2667.14	Bd1-1vsBd3-1	CG
Bd1	66304339	66305026	688	169	0.0458395	0.932512	-0.886673	-2575.02	Bd1-1vsBd3-1	CG
Bd1	69168363	69170514	2152	200	0.0680898	0.949773	-0.881683	-2569.7	Bd1-1vsBd3-1	CG
Bd1	17776507	17777316	810	187	0.942952	0.0869485	0.856004	2561.32	Bd1-1vsBd3-1	CG
Bd1	4125865	4127252	1388	246	0.842329	0.0515369	0.790792	2557.93	Bd1-1vsBd3-1	CG
Bd1	16909580	16910418	839	161	0.0604368	0.949974	-0.889538	-2555.37	Bd1-1vsBd3-1	CG
Bd1	4708487	4709838	1352	194	0.965267	0.0919325	0.873335	2529.31	Bd1-1vsBd3-1	CG
Bd1	53376249	53376994	746	153	0.935182	0.0800649	0.855117	2524.83	Bd1-1vsBd3-1	CG
Bd1	68876725	68877638	914	173	0.955642	0.0824144	0.873227	2492.9	Bd1-1vsBd3-1	CG
Bd1	60672846	60673637	792	200	0.908848	0.0678653	0.840983	2485.6	Bd1-1vsBd3-1	CG
Bd1	61375765	61376862	1098	199	0.242441	0.954099	-0.711658	-2446	Bd1-1vsBd3-1	CG
Bd1	34837070	34838708	1639	202	0.940946	0.09196	0.848986	2443.03	Bd1-1vsBd3-1	CG
Bd1	57495081	57496115	1035	139	0.963637	0.08776	0.875877	2417.31	Bd1-1vsBd3-1	CG
Bd1	73698665	73700125	1461	162	0.964759	0.0607007	0.904059	2407.67	Bd1-1vsBd3-1	CG
Bd1	70196796	70197932	1137	189	0.943386	0.0529215	0.890464	2394.82	Bd1-1vsBd3-1	CG
Bd1	3587842	3589116	1275	185	0.111386	0.949711	-0.838325	-2384.86	Bd1-1vsBd3-1	CG
Bd1	16844773	16846146	1374	194	0.941822	0.10067	0.841152	2357.45	Bd1-1vsBd3-1	CG
Bd1	45341436	45342140	705	177	0.0493529	0.928522	-0.879169	-2337.41	Bd1-1vsBd3-1	CG
Bd1	13889951	13890557	607	144	0.0364543	0.949336	-0.912882	-2327.32	Bd1-1vsBd3-1	CG
Bd1	40197838	40198764	927	162	0.0590549	0.900766	-0.841711	-2310.35	Bd1-1vsBd3-1	CG
Bd1	47268123	47268880	758	171	0.942876	0.0566293	0.886246	2309.67	Bd1-1vsBd3-1	CG
Bd1	58655645	58657209	1565	155	0.959292	0.0593765	0.899916	2305	Bd1-1vsBd3-1	CG
Bd1	43449484	43450461	978	186	0.957265	0.0664473	0.890818	2302.7	Bd1-1vsBd3-1	CG
Bd1	28853168	28854183	1016	172	0.926687	0.0556467	0.87104	2288.71	Bd1-1vsBd3-1	CG
Bd1	45275972	45276751	780	199	0.0488692	0.926547	-0.877678	-2285.66	Bd1-1vsBd3-1	CG
Bd1	3224992	3225686	695	148	0.942676	0.0798274	0.862849	2273.05	Bd1-1vsBd3-1	CG
Bd1	13076013	13076860	848	167	0.0638895	0.904037	-0.840147	-2257.82	Bd1-1vsBd3-1	CG
Bd1	58190938	58191719	782	151	0.0612293	0.914539	-0.85331	-2226.18	Bd1-1vsBd3-1	CG
Bd1	30471759	30472663	905	149	0.938907	0.0519824	0.886924	2209.79	Bd1-1vsBd3-1	CG
Bd1	55828164	55828933	770	188	0.947578	0.102489	0.845089	2193.46	Bd1-1vsBd3-1	CG
Bd1	52650878	52651780	903	149	0.935244	0.0514267	0.883817	2192.08	Bd1-1vsBd3-1	CG
Bd1	49037443	49038252	810	159	0.032683	0.866415	-0.833732	-2183.84	Bd1-1vsBd3-1	CG
Bd1	21907522	21908496	975	143	0.929899	0.0541818	0.875718	2176.25	Bd1-1vsBd3-1	CG
Bd1	56979033	56980145	1113	184	0.0675295	0.857627	-0.790097	-2173.22	Bd1-1vsBd3-1	CG
Bd1	40625041	40625619	579	105	0.0483402	0.958417	-0.910077	-2140.5	Bd1-1vsBd3-1	CG
Bd1	12185742	12187137	1396	149	0.948371	0.071532	0.876839	2087.64	Bd1-1vsBd3-1	CG
Bd1	62596672	62597748	1077	127	0.0414617	0.941929	-0.900467	-2081.11	Bd1-1vsBd3-1	CG
Bd1	19577821	19578917	1097	139	0.953524	0.0948917	0.858633	2068.47	Bd1-1vsBd3-1	CG
Bd1	16910475	16911334	860	135	0.0545285	0.952192	-0.897663	-2065.08	Bd1-1vsBd3-1	CG
Bd1	64619998	64621417	1420	149	0.0603989	0.939868	-0.879469	-2060.44	Bd1-1vsBd3-1	CG
Bd1	26111887	26112818	932	185	0.0541131	0.849033	-0.79492	-2059.66	Bd1-1vsBd3-1	CG
Bd1	42199550	42200455	906	138	0.928065	0.0911916	0.836873	2059.65	Bd1-1vsBd3-1	CG
Bd1	42982354	42983252	899	170	0.942495	0.0947899	0.847705	2056.25	Bd1-1vsBd3-1	CG
Bd1	48300185	48301525	1341	144	0.953828	0.0637988	0.89003	2047.64	Bd1-1vsBd3-1	CG
Bd1	7314537	7315470	934	152	0.0839279	0.934208	-0.85028	-2043.77	Bd1-1vsBd3-1	CG
Bd1	14094366	14095814	1449	195	0.929384	0.0651777	0.864207	2030.19	Bd1-1vsBd3-1	CG
Bd1	5210546	5212005	1460	185	0.919537	0.0707835	0.848754	2021.2	Bd1-1vsBd3-1	CG
Bd1	52020601	52021465	865	193	0.938773	0.0704735	0.8683	2017.42	Bd1-1vsBd3-1	CG
Bd1	34365216	34366253	1038	126	0.122529	0.955635	-0.833106	-2012.11	Bd1-1vsBd3-1	CG
Bd1	41679277	41680032	756	135	0.911803	0.0578079	0.853995	2007.39	Bd1-1vsBd3-1	CG
Bd1	53415930	53416665	736	123	0.940574	0.081421	0.859153	2001.84	Bd1-1vsBd3-1	CG
Bd1	63394850	63395699	850	173	0.910551	0.0868195	0.823731	1994.17	Bd1-1vsBd3-1	CG
Bd1	17088506	17089284	779	128	0.0386191	0.94779	-0.909171	-1983.33	Bd1-1vsBd3-1	CG
Bd1	48517467	48518031	565	109	0.042856	0.960877	-0.918021	-1980.85	Bd1-1vsBd3-1	CG
Bd1	64344913	64345588	676	157	0.941503	0.0648504	0.876653	1977.54	Bd1-1vsBd3-1	CG
Bd1	54809582	54811015	1434	165	0.937363	0.0910711	0.846292	1971.39	Bd1-1vsBd3-1	CG
Bd1	47281642	47284050	2409	167	0.945906	0.0940196	0.851886	1968.95	Bd1-1vsBd3-1	CG
Bd1	51570755	51571553	799	138	0.909979	0.091364	0.818615	1964.19	Bd1-1vsBd3-1	CG
Bd1	40926955	40928053	1099	196	0.127153	0.937327	-0.810173	-1957.29	Bd1-1vsBd3-1	CG
Bd1	50174595	50175576	982	123	0.0516351	0.938197	-0.886562	-1951.75	Bd1-1vsBd3-1	CG
Bd1	30271447	30272344	898	152	0.0601617	0.929654	-0.869493	-1949.38	Bd1-1vsBd3-1	CG
Bd1	41460885	41461613	729	150	0.044507	0.903474	-0.858967	-1944.48	Bd1-1vsBd3-1	CG
Bd1	36524844	36525696	853	122	0.0551154	0.945576	-0.890461	-1936.68	Bd1-1vsBd3-1	CG
Bd1	70420042	70421006	965	146	0.091215	0.941139	-0.849924	-1936.23	Bd1-1vsBd3-1	CG
Bd1	8182187	8182996	810	152	0.129032	0.948449	-0.819417	-1928.9	Bd1-1vsBd3-1	CG
Bd1	34023332	34024615	1284	140	0.954233	0.0858302	0.868403	1925.6	Bd1-1vsBd3-1	CG
Bd1	67743330	67744034	705	164	0.0597729	0.908567	-0.848794	-1923.24	Bd1-1vsBd3-1	CG
Bd1	58517263	58518076	814	142	0.0745533	0.885566	-0.811013	-1914.66	Bd1-1vsBd3-1	CG
Bd1	69143611	69144552	942	162	0.0514726	0.91777	-0.866297	-1914.19	Bd1-1vsBd3-1	CG
Bd1	34013312	34014237	926	181	0.83594	0.0464069	0.789534	1907.51	Bd1-1vsBd3-1	CG
Bd1	4041441	4042177	737	96	0.0949337	0.950482	-0.855548	-1893.46	Bd1-1vsBd3-1	CG
Bd1	8877037	8877832	796	142	0.17894	0.959875	-0.780934	-1888.88	Bd1-1vsBd3-1	CG
Bd1	25356386	25357289	904	145	0.0936222	0.91913	-0.825508	-1886.56	Bd1-1vsBd3-1	CG
Bd1	26456141	26457050	910	111	0.0415444	0.947607	-0.906063	-1870.51	Bd1-1vsBd3-1	CG
Bd1	43830719	43831437	719	123	0.945179	0.072043	0.873136	1866.8	Bd1-1vsBd3-1	CG
Bd1	59275242	59276176	935	135	0.0659446	0.945134	-0.87919	-1861.43	Bd1-1vsBd3-1	CG
Bd1	30106807	30107503	697	142	0.946534	0.132804	0.813731	1854.28	Bd1-1vsBd3-1	CG
Bd1	30401738	30403276	1539	173	0.960524	0.155835	0.804688	1852.71	Bd1-1vsBd3-1	CG
Bd1	37653776	37654394	619	128	0.0516849	0.923036	-0.871352	-1844.77	Bd1-1vsBd3-1	CG
Bd1	31817940	31818572	633	132	0.937784	0.161705	0.776079	1824.54	Bd1-1vsBd3-1	CG
Bd1	62530801	62531535	735	139	0.0479351	0.908012	-0.860077	-1820.94	Bd1-1vsBd3-1	CG
Bd1	37185845	37186706	862	126	0.935569	0.0718425	0.863727	1812.64	Bd1-1vsBd3-1	CG
Bd1	37658689	37659341	653	119	0.0623215	0.931432	-0.86911	-1810.07	Bd1-1vsBd3-1	CG
Bd1	54251239	54251977	739	127	0.0669336	0.942872	-0.875939	-1802.69	Bd1-1vsBd3-1	CG
Bd1	23806669	23807439	771	134	0.945379	0.0648788	0.8805	1799.5	Bd1-1vsBd3-1	CG
Bd1	25844579	25845268	690	148	0.0655278	0.912603	-0.847075	-1798.62	Bd1-1vsBd3-1	CG
Bd1	38737311	38737952	642	155	0.936097	0.0926701	0.843427	1792.47	Bd1-1vsBd3-1	CG
Bd1	60195172	60196050	879	146	0.0866648	0.944853	-0.858188	-1789.41	Bd1-1vsBd3-1	CG
Bd1	57007587	57008509	923	151	0.0578265	0.880914	-0.823088	-1775.58	Bd1-1vsBd3-1	CG
Bd1	30476576	30477369	794	120	0.105989	0.957089	-0.8511	-1775.31	Bd1-1vsBd3-1	CG
Bd1	4814829	4815787	959	166	0.087205	0.881494	-0.794289	-1774.14	Bd1-1vsBd3-1	CG
Bd1	57943742	57944588	847	142	0.0595316	0.917731	-0.858199	-1767.47	Bd1-1vsBd3-1	CG
Bd1	71528801	71529323	523	132	0.0748645	0.942894	-0.86803	-1759.78	Bd1-1vsBd3-1	CG
Bd1	74112039	74112642	604	107	0.0599854	0.945167	-0.885182	-1751.5	Bd1-1vsBd3-1	CG
Bd1	34542651	34543317	667	120	0.0623169	0.940618	-0.878301	-1736.04	Bd1-1vsBd3-1	CG
Bd1	68644281	68644808	528	90	0.0310031	0.928993	-0.89799	-1735.77	Bd1-1vsBd3-1	CG
Bd1	71732823	71733561	739	141	0.922479	0.0739671	0.848512	1730.74	Bd1-1vsBd3-1	CG
Bd1	14789034	14789558	525	146	0.892881	0.0419769	0.850904	1717.05	Bd1-1vsBd3-1	CG
Bd1	53845386	53846196	811	157	0.919878	0.0595356	0.860342	1706.86	Bd1-1vsBd3-1	CG
Bd1	43689320	43689911	592	102	0.0660707	0.961898	-0.895827	-1704.33	Bd1-1vsBd3-1	CG
Bd1	26321263	26322104	842	126	0.946428	0.0609117	0.885517	1703.87	Bd1-1vsBd3-1	CG
Bd1	34644315	34645107	793	109	0.954854	0.118152	0.836703	1703.65	Bd1-1vsBd3-1	CG
Bd1	3135189	3135906	718	126	0.0521827	0.933252	-0.881069	-1700.69	Bd1-1vsBd3-1	CG
Bd1	33212295	33213213	919	118	0.944041	0.0673702	0.876671	1699.11	Bd1-1vsBd3-1	CG
Bd1	11000954	11001438	485	95	0.944262	0.0550178	0.889245	1692.25	Bd1-1vsBd3-1	CG
Bd1	15622211	15623073	863	177	0.928091	0.161816	0.766275	1686.06	Bd1-1vsBd3-1	CG
Bd1	65657464	65658027	564	121	0.0595963	0.925196	-0.8656	-1685.91	Bd1-1vsBd3-1	CG
Bd1	6806785	6807215	431	99	0.941804	0.0362427	0.905562	1680.86	Bd1-1vsBd3-1	CG
Bd1	70597137	70597845	709	123	0.0859487	0.946643	-0.860695	-1679.65	Bd1-1vsBd3-1	CG
Bd1	6538603	6539289	687	126	0.0646951	0.93146	-0.866765	-1676.29	Bd1-1vsBd3-1	CG
Bd1	64612810	64613463	654	126	0.0683515	0.937736	-0.869384	-1672.38	Bd1-1vsBd3-1	CG
Bd1	25710281	25710848	568	115	0.91739	0.0441857	0.873204	1666.24	Bd1-1vsBd3-1	CG
Bd1	71171	72448	1278	124	0.0786943	0.948065	-0.86937	-1664.55	Bd1-1vsBd3-1	CG
Bd1	52985354	52986186	833	116	0.0587457	0.891418	-0.832672	-1655.46	Bd1-1vsBd3-1	CG
Bd1	22403875	22405753	1879	140	0.946669	0.161878	0.784791	1636.56	Bd1-1vsBd3-1	CG
Bd1	74823990	74825397	1408	100	0.948791	0.0810932	0.867698	1624.63	Bd1-1vsBd3-1	CG
Bd1	44917214	44917935	722	140	0.0508743	0.915745	-0.86487	-1615.5	Bd1-1vsBd3-1	CG
Bd1	54204998	54206370	1373	150	0.88612	0.0704366	0.815683	1606.73	Bd1-1vsBd3-1	CG
Bd1	62873102	62873830	729	137	0.944125	0.0800803	0.864045	1598.08	Bd1-1vsBd3-1	CG
Bd1	74666331	74666946	616	122	0.0593255	0.937642	-0.878317	-1596.63	Bd1-1vsBd3-1	CG
Bd1	37546447	37547223	777	121	0.0416478	0.920189	-0.878541	-1585.77	Bd1-1vsBd3-1	CG
Bd1	58192247	58193059	813	112	0.0713499	0.941169	-0.869819	-1578.43	Bd1-1vsBd3-1	CG
Bd1	4140600	4141364	765	142	0.880543	0.0680269	0.812516	1575.7	Bd1-1vsBd3-1	CG
Bd1	67316748	67317661	914	200	0.924182	0.225673	0.698509	1575.65	Bd1-1vsBd3-1	CG
Bd1	7908294	7909199	906	105	0.937829	0.0614366	0.876393	1574.66	Bd1-1vsBd3-1	CG
Bd1	53590376	53591133	758	71	0.0520416	0.961295	-0.909253	-1574.12	Bd1-1vsBd3-1	CG
Bd1	5703956	5704779	824	101	0.950586	0.0734117	0.877175	1571.87	Bd1-1vsBd3-1	CG
Bd1	30978732	30979539	808	116	0.0664069	0.925977	-0.85957	-1568.48	Bd1-1vsBd3-1	CG
Bd1	15267370	15267859	490	124	0.0344981	0.881805	-0.847306	-1567.01	Bd1-1vsBd3-1	CG
Bd1	14627798	14628728	931	125	0.927566	0.088826	0.83874	1562.09	Bd1-1vsBd3-1	CG
Bd1	16691480	16692225	746	162	0.0887332	0.880331	-0.791598	-1558.17	Bd1-1vsBd3-1	CG
Bd1	26920346	26921035	690	119	0.0874157	0.95428	-0.866864	-1546.4	Bd1-1vsBd3-1	CG
Bd1	48119003	48120100	1098	144	0.949922	0.280567	0.669355	1540.9	Bd1-1vsBd3-1	CG
Bd1	50015848	50016505	658	126	0.944787	0.0694427	0.875344	1537.55	Bd1-1vsBd3-1	CG
Bd1	45336869	45337447	579	109	0.0930417	0.934185	-0.841143	-1535.07	Bd1-1vsBd3-1	CG
Bd1	43070357	43071253	897	114	0.0592632	0.949696	-0.890433	-1534.92	Bd1-1vsBd3-1	CG
Bd1	32211464	32211959	496	125	0.952205	0.0651244	0.887081	1528.45	Bd1-1vsBd3-1	CG
Bd1	7500482	7500896	415	113	0.0808041	0.949765	-0.868961	-1524.94	Bd1-1vsBd3-1	CG
Bd1	41152762	41153390	629	105	0.0854989	0.950511	-0.865012	-1523.1	Bd1-1vsBd3-1	CG
Bd1	17291192	17292235	1044	126	0.939797	0.0973412	0.842456	1519.9	Bd1-1vsBd3-1	CG
Bd1	39580761	39581280	520	97	0.0512921	0.937604	-0.886312	-1515.18	Bd1-1vsBd3-1	CG
Bd1	22540613	22541409	797	108	0.913095	0.0855317	0.827563	1514.08	Bd1-1vsBd3-1	CG
Bd1	17889369	17890055	687	127	0.929261	0.0647559	0.864505	1509.13	Bd1-1vsBd3-1	CG
Bd1	5789407	5790223	817	114	0.917913	0.0784288	0.839484	1506.47	Bd1-1vsBd3-1	CG
Bd1	38625333	38626075	743	92	0.0398424	0.956246	-0.916404	-1503.4	Bd1-1vsBd3-1	CG
Bd1	17349589	17350401	813	100	0.0803071	0.953638	-0.873331	-1501.4	Bd1-1vsBd3-1	CG
Bd1	7037108	7038177	1070	163	0.936959	0.076018	0.860941	1499	Bd1-1vsBd3-1	CG
Bd1	54647486	54648474	989	204	0.280947	0.93811	-0.657162	-1498.86	Bd1-1vsBd3-1	CG
Bd1	2432349	2432994	646	151	0.0622043	0.923222	-0.861018	-1497.73	Bd1-1vsBd3-1	CG
Bd1	49396746	49397537	792	155	0.0444144	0.812109	-0.767694	-1497.05	Bd1-1vsBd3-1	CG
Bd1	26501865	26502580	716	101	0.0631756	0.937903	-0.874727	-1488.89	Bd1-1vsBd3-1	CG
Bd1	10897262	10897790	529	109	0.0770728	0.94199	-0.864917	-1484.65	Bd1-1vsBd3-1	CG
Bd1	69700168	69700976	809	94	0.949389	0.0702357	0.879153	1471.38	Bd1-1vsBd3-1	CG
Bd1	33647330	33647988	659	98	0.946453	0.061382	0.885071	1461.23	Bd1-1vsBd3-1	CG
Bd1	37054204	37055142	939	141	0.94965	0.207463	0.742186	1456.38	Bd1-1vsBd3-1	CG
Bd1	68338560	68339071	512	114	0.0796456	0.938659	-0.859013	-1451.83	Bd1-1vsBd3-1	CG
Bd1	42568771	42569572	802	81	0.953317	0.0535588	0.899758	1448.4	Bd1-1vsBd3-1	CG
Bd1	17073090	17073856	767	89	0.0512781	0.942452	-0.891174	-1444.09	Bd1-1vsBd3-1	CG
Bd1	16846577	16847151	575	99	0.956068	0.0710315	0.885036	1418.93	Bd1-1vsBd3-1	CG
Bd1	73687638	73688485	848	88	0.0448611	0.935879	-0.891018	-1418.53	Bd1-1vsBd3-1	CG
Bd1	74825465	74826377	913	76	0.963957	0.108984	0.854973	1408.72	Bd1-1vsBd3-1	CG
Bd1	63622142	63622728	587	100	0.935341	0.0609592	0.874382	1408.2	Bd1-1vsBd3-1	CG
Bd1	73696726	73698604	1879	122	0.938957	0.0954608	0.843496	1405.38	Bd1-1vsBd3-1	CG
Bd1	18917958	18918618	661	134	0.923444	0.0804961	0.842948	1402.73	Bd1-1vsBd3-1	CG
Bd1	3020270	3021649	1380	101	0.0565931	0.950607	-0.894014	-1392.19	Bd1-1vsBd3-1	CG
Bd1	13557270	13557877	608	78	0.0726873	0.95187	-0.879183	-1382.76	Bd1-1vsBd3-1	CG
Bd1	27825146	27825723	578	111	0.0415202	0.858341	-0.816821	-1378.07	Bd1-1vsBd3-1	CG
Bd1	50130937	50131552	616	115	0.0733424	0.94231	-0.868967	-1377.24	Bd1-1vsBd3-1	CG
Bd1	69009645	69010407	763	115	0.8423	0.0774326	0.764868	1373.11	Bd1-1vsBd3-1	CG
Bd1	41158429	41159033	605	100	0.926707	0.0908045	0.835903	1372.77	Bd1-1vsBd3-1	CG
Bd1	50004273	50004976	704	97	0.931684	0.0726	0.859084	1370.99	Bd1-1vsBd3-1	CG
Bd1	53793540	53794308	769	87	0.9638	0.0872595	0.876541	1370.61	Bd1-1vsBd3-1	CG
Bd1	68804570	68805346	777	104	0.943689	0.0711009	0.872588	1369.48	Bd1-1vsBd3-1	CG
Bd1	37547286	37547913	628	86	0.0475904	0.934547	-0.886956	-1352.73	Bd1-1vsBd3-1	CG
Bd1	68596881	68597445	565	89	0.0388664	0.919326	-0.88046	-1344.63	Bd1-1vsBd3-1	CG
Bd1	72380196	72381157	962	131	0.136093	0.908735	-0.772642	-1343.05	Bd1-1vsBd3-1	CG
Bd1	11782018	11782613	596	98	0.0874583	0.961798	-0.874339	-1341.81	Bd1-1vsBd3-1	CG
Bd1	52517918	52518379	462	101	0.045692	0.93656	-0.890868	-1340.39	Bd1-1vsBd3-1	CG
Bd1	59361813	59362305	493	141	0.123937	0.923775	-0.799838	-1340.02	Bd1-1vsBd3-1	CG
Bd1	57875240	57875754	515	107	0.933632	0.0485571	0.885075	1339.08	Bd1-1vsBd3-1	CG
Bd1	35896560	35897716	1157	130	0.153576	0.931604	-0.778028	-1337.69	Bd1-1vsBd3-1	CG
Bd1	53305570	53306004	435	75	0.043449	0.950604	-0.907155	-1336.77	Bd1-1vsBd3-1	CG
Bd1	42586142	42586759	618	94	0.954078	0.0656429	0.888435	1334.9	Bd1-1vsBd3-1	CG
Bd1	23393272	23394240	969	91	0.0769557	0.929854	-0.852899	-1334.83	Bd1-1vsBd3-1	CG
Bd1	22576437	22577303	867	139	0.861512	0.0735703	0.787942	1333.25	Bd1-1vsBd3-1	CG
Bd1	40405846	40406669	824	88	0.946923	0.0587976	0.888126	1327.9	Bd1-1vsBd3-1	CG
Bd1	23529848	23530569	722	197	0.154734	0.906874	-0.75214	-1324.33	Bd1-1vsBd3-1	CG
Bd1	7328139	7328676	538	98	0.939626	0.135802	0.803824	1313.88	Bd1-1vsBd3-1	CG
Bd1	55363922	55364362	441	80	0.96274	0.170989	0.791751	1308.66	Bd1-1vsBd3-1	CG
Bd1	9945715	9946546	832	126	0.0570218	0.829147	-0.772125	-1307.52	Bd1-1vsBd3-1	CG
Bd1	16109741	16110360	620	75	0.0638451	0.923953	-0.860108	-1306.42	Bd1-1vsBd3-1	CG
Bd1	57700212	57701056	845	109	0.0462824	0.866614	-0.820332	-1301.58	Bd1-1vsBd3-1	CG
Bd1	62714635	62715237	603	86	0.0803811	0.94763	-0.867249	-1300.73	Bd1-1vsBd3-1	CG
Bd1	58576205	58576670	466	112	0.0786986	0.848168	-0.76947	-1299.03	Bd1-1vsBd3-1	CG
Bd1	33683834	33684944	1111	96	0.925437	0.0927754	0.832662	1295.99	Bd1-1vsBd3-1	CG
Bd1	37484681	37485170	490	76	0.0540581	0.953953	-0.899895	-1295.32	Bd1-1vsBd3-1	CG
Bd1	61281947	61282714	768	132	0.887933	0.136533	0.7514	1294.13	Bd1-1vsBd3-1	CG
Bd1	55496287	55497302	1016	96	0.0441401	0.916082	-0.871942	-1292.65	Bd1-1vsBd3-1	CG
Bd1	67346197	67346686	490	83	0.0722234	0.940553	-0.868329	-1287.97	Bd1-1vsBd3-1	CG
Bd1	23755405	23755943	539	80	0.0698525	0.948485	-0.878632	-1281.99	Bd1-1vsBd3-1	CG
Bd1	28989720	28990541	822	107	0.135391	0.906097	-0.770706	-1279.22	Bd1-1vsBd3-1	CG
Bd1	71347385	71348304	920	92	0.0931729	0.94444	-0.851267	-1271.94	Bd1-1vsBd3-1	CG
Bd1	20263052	20263659	608	85	0.958015	0.0901099	0.867905	1271.33	Bd1-1vsBd3-1	CG
Bd1	17160419	17160859	441	85	0.0486629	0.934404	-0.885741	-1270.37	Bd1-1vsBd3-1	CG
Bd1	21009745	21010435	691	117	0.897369	0.0530959	0.844273	1270.15	Bd1-1vsBd3-1	CG
Bd1	61998911	61999549	639	77	0.962188	0.0633425	0.898846	1269.29	Bd1-1vsBd3-1	CG
Bd1	52899808	52900844	1037	111	0.0785726	0.932479	-0.853906	-1263.78	Bd1-1vsBd3-1	CG
Bd1	68599217	68600108	892	129	0.919807	0.18063	0.739177	1249.21	Bd1-1vsBd3-1	CG
Bd1	26823640	26824438	799	118	0.884992	0.0651433	0.819849	1244.65	Bd1-1vsBd3-1	CG
Bd1	18222771	18223375	605	84	0.950886	0.0811529	0.869733	1243.16	Bd1-1vsBd3-1	CG
Bd1	71094457	71095146	690	125	0.171752	0.896055	-0.724303	-1242.08	Bd1-1vsBd3-1	CG
Bd1	58242892	58243713	822	101	0.0831499	0.935763	-0.852613	-1238.87	Bd1-1vsBd3-1	CG
Bd1	57497126	57497665	540	101	0.0425778	0.846201	-0.803623	-1237.38	Bd1-1vsBd3-1	CG
Bd1	63643397	63644207	811	118	0.959823	0.109586	0.850237	1232.63	Bd1-1vsBd3-1	CG
Bd1	10970315	10970815	501	85	0.0766281	0.95592	-0.879292	-1231.14	Bd1-1vsBd3-1	CG
Bd1	47279967	47281255	1289	122	0.916893	0.113791	0.803102	1228.04	Bd1-1vsBd3-1	CG
Bd1	53373582	53374166	585	86	0.952949	0.0886647	0.864284	1221.92	Bd1-1vsBd3-1	CG
Bd1	45486179	45486797	619	87	0.0660213	0.949967	-0.883946	-1220.14	Bd1-1vsBd3-1	CG
Bd1	30970595	30971294	700	84	0.0423532	0.893196	-0.850843	-1217.88	Bd1-1vsBd3-1	CG
Bd1	5808513	5809165	653	84	0.0499073	0.940929	-0.891021	-1217.11	Bd1-1vsBd3-1	CG
Bd1	8392022	8392740	719	84	0.935845	0.0656037	0.870241	1216.19	Bd1-1vsBd3-1	CG
Bd1	68389651	68390184	534	98	0.949042	0.0739607	0.875081	1215.03	Bd1-1vsBd3-1	CG
Bd1	32481559	32482335	777	96	0.102677	0.918884	-0.816207	-1207.07	Bd1-1vsBd3-1	CG
Bd1	30401240	30401677	438	86	0.883668	0.0851775	0.79849	1204.07	Bd1-1vsBd3-1	CG
Bd1	48761953	48762724	772	84	0.0516827	0.905249	-0.853566	-1194.93	Bd1-1vsBd3-1	CG
Bd1	56440876	56441651	776	78	0.936313	0.049787	0.886526	1188.16	Bd1-1vsBd3-1	CG
Bd1	15245466	15246783	1318	103	0.935575	0.112623	0.822952	1186.56	Bd1-1vsBd3-1	CG
Bd1	25622598	25623356	759	88	0.959984	0.0821025	0.877881	1183.95	Bd1-1vsBd3-1	CG
Bd1	49400640	49401180	541	140	0.159491	0.892567	-0.733076	-1179.31	Bd1-1vsBd3-1	CG
Bd1	67614527	67615028	502	82	0.903364	0.0655954	0.837768	1177.35	Bd1-1vsBd3-1	CG
Bd1	53180033	53180608	576	94	0.101204	0.938099	-0.836896	-1176.26	Bd1-1vsBd3-1	CG
Bd1	70738783	70739674	892	155	0.793448	0.046024	0.747424	1162.43	Bd1-1vsBd3-1	CG
Bd1	38550384	38550893	510	61	0.0602936	0.959198	-0.898905	-1162.26	Bd1-1vsBd3-1	CG
Bd1	68819630	68820449	820	74	0.960509	0.0676538	0.892856	1161.87	Bd1-1vsBd3-1	CG
Bd1	66762160	66762804	645	69	0.943099	0.0550394	0.888059	1161.54	Bd1-1vsBd3-1	CG
Bd1	23100181	23100865	685	102	0.928343	0.15855	0.769793	1157.43	Bd1-1vsBd3-1	CG
Bd1	25658287	25658877	591	103	0.178986	0.920004	-0.741018	-1153.61	Bd1-1vsBd3-1	CG
Bd1	41855716	41856201	486	90	0.0695241	0.941199	-0.871674	-1151.98	Bd1-1vsBd3-1	CG
Bd1	51606641	51607340	700	73	0.956054	0.0881018	0.867952	1151.39	Bd1-1vsBd3-1	CG
Bd1	46244022	46244494	473	112	0.185018	0.843774	-0.658756	-1150.01	Bd1-1vsBd3-1	CG
Bd1	43645540	43645985	446	70	0.0861414	0.962699	-0.876557	-1148.22	Bd1-1vsBd3-1	CG
Bd1	33478934	33479441	508	99	0.0531086	0.933989	-0.88088	-1145.44	Bd1-1vsBd3-1	CG
Bd1	25074693	25075089	397	80	0.958163	0.0629427	0.89522	1145.39	Bd1-1vsBd3-1	CG
Bd1	34026046	34026671	626	83	0.933088	0.0525125	0.880575	1142.38	Bd1-1vsBd3-1	CG
Bd1	32506156	32507072	917	127	0.127589	0.907144	-0.779556	-1141.63	Bd1-1vsBd3-1	CG
Bd1	59422703	59423400	698	72	0.949023	0.0555956	0.893427	1137.85	Bd1-1vsBd3-1	CG
Bd1	55149308	55149710	403	103	0.0519214	0.895952	-0.844031	-1130.96	Bd1-1vsBd3-1	CG
Bd1	37124233	37125068	836	97	0.862448	0.148851	0.713597	1129.1	Bd1-1vsBd3-1	CG
Bd1	27018625	27019165	541	113	0.0874599	0.884695	-0.797236	-1125.78	Bd1-1vsBd3-1	CG
Bd1	24242637	24243195	559	72	0.939654	0.110766	0.828888	1124.04	Bd1-1vsBd3-1	CG
Bd1	48110368	48111178	811	93	0.0761167	0.940205	-0.864088	-1122.93	Bd1-1vsBd3-1	CG
Bd1	12176606	12176983	378	78	0.930539	0.0458129	0.884726	1120.62	Bd1-1vsBd3-1	CG
Bd1	40935538	40936066	529	66	0.899701	0.0649746	0.834726	1119.94	Bd1-1vsBd3-1	CG
Bd1	56686285	56686684	400	95	0.947211	0.0661481	0.881063	1115.06	Bd1-1vsBd3-1	CG
Bd1	11783355	11783778	424	93	0.944525	0.0657509	0.878774	1114.58	Bd1-1vsBd3-1	CG
Bd1	57701181	57702234	1054	104	0.0546931	0.890621	-0.835928	-1112.45	Bd1-1vsBd3-1	CG
Bd1	29711478	29711930	453	68	0.0420251	0.946822	-0.904797	-1110.86	Bd1-1vsBd3-1	CG
Bd1	58257947	58258601	655	99	0.96512	0.156129	0.808992	1109.67	Bd1-1vsBd3-1	CG
Bd1	55242047	55242616	570	110	0.0836017	0.918656	-0.835054	-1106.83	Bd1-1vsBd3-1	CG
Bd1	47220200	47220735	536	97	0.863732	0.0750225	0.78871	1103.22	Bd1-1vsBd3-1	CG
Bd1	14325749	14326311	563	101	0.930648	0.0753031	0.855345	1103.19	Bd1-1vsBd3-1	CG
Bd1	3129953	3130542	590	74	0.95456	0.0710138	0.883546	1101.82	Bd1-1vsBd3-1	CG
Bd1	5675430	5676083	654	72	0.947138	0.0527819	0.894356	1101.34	Bd1-1vsBd3-1	CG
Bd1	7149122	7149541	420	110	0.790618	0.0368848	0.753733	1098.37	Bd1-1vsBd3-1	CG
Bd1	33446370	33446954	585	85	0.895582	0.0633099	0.832272	1097.43	Bd1-1vsBd3-1	CG
Bd1	33996165	33997714	1550	95	0.0787717	0.946532	-0.867761	-1097.01	Bd1-1vsBd3-1	CG
Bd1	15113877	15114373	497	75	0.934701	0.0916701	0.843031	1095.99	Bd1-1vsBd3-1	CG
Bd1	51730788	51731104	317	69	0.927423	0.0403339	0.887089	1092.72	Bd1-1vsBd3-1	CG
Bd1	24017890	24018319	430	96	0.0541483	0.849849	-0.795701	-1091.87	Bd1-1vsBd3-1	CG
Bd1	21257148	21257614	467	74	0.915402	0.108425	0.806977	1091.62	Bd1-1vsBd3-1	CG
Bd1	28380475	28381042	568	83	0.942862	0.0857737	0.857088	1089.52	Bd1-1vsBd3-1	CG
Bd1	41293598	41294397	800	74	0.054786	0.954806	-0.90002	-1085.57	Bd1-1vsBd3-1	CG
Bd1	52530930	52531550	621	79	0.0662171	0.922452	-0.856235	-1081.36	Bd1-1vsBd3-1	CG
Bd1	34557790	34558351	562	162	0.144178	0.907577	-0.763399	-1081.01	Bd1-1vsBd3-1	CG
Bd1	23829721	23830132	412	79	0.926238	0.0401712	0.886067	1076.68	Bd1-1vsBd3-1	CG
Bd1	6010001	6010610	610	69	0.0817808	0.946009	-0.864228	-1070.25	Bd1-1vsBd3-1	CG
Bd1	2345676	2346236	561	98	0.072725	0.93739	-0.864665	-1068.7	Bd1-1vsBd3-1	CG
Bd1	36542047	36542705	659	74	0.938778	0.0712049	0.867574	1068.36	Bd1-1vsBd3-1	CG
Bd1	48193045	48193514	470	121	0.896742	0.109599	0.787142	1067	Bd1-1vsBd3-1	CG
Bd1	4766203	4766676	474	73	0.0401686	0.877366	-0.837197	-1066.6	Bd1-1vsBd3-1	CG
Bd1	11453095	11453732	638	102	0.861637	0.0568596	0.804777	1064.61	Bd1-1vsBd3-1	CG
Bd1	61792673	61793166	494	94	0.0668623	0.927856	-0.860994	-1063.63	Bd1-1vsBd3-1	CG
Bd1	15253534	15254325	792	88	0.0996344	0.941526	-0.841892	-1059.68	Bd1-1vsBd3-1	CG
Bd1	24627482	24627954	473	73	0.920946	0.0669673	0.853979	1054.2	Bd1-1vsBd3-1	CG
Bd1	33369444	33369798	355	61	0.0951519	0.966411	-0.871259	-1051.67	Bd1-1vsBd3-1	CG
Bd1	37494226	37495001	776	136	0.880037	0.252771	0.627266	1051.19	Bd1-1vsBd3-1	CG
Bd1	22852341	22852839	499	107	0.931085	0.0883288	0.842756	1049.51	Bd1-1vsBd3-1	CG
Bd1	68811675	68812013	339	86	0.0521824	0.873537	-0.821354	-1048.95	Bd1-1vsBd3-1	CG
Bd1	16535751	16536152	402	102	0.0747555	0.873389	-0.798633	-1043.38	Bd1-1vsBd3-1	CG
Bd1	34954736	34955643	908	74	0.96355	0.059765	0.903785	1039.61	Bd1-1vsBd3-1	CG
Bd1	54917020	54917734	715	89	0.0970305	0.921675	-0.824645	-1037.26	Bd1-1vsBd3-1	CG
Bd1	50523407	50524095	689	104	0.943644	0.187586	0.756058	1036.25	Bd1-1vsBd3-1	CG
Bd1	60974908	60975667	760	127	0.114188	0.901544	-0.787355	-1036.04	Bd1-1vsBd3-1	CG
Bd1	67136001	67136800	800	61	0.941624	0.0388354	0.902788	1032.85	Bd1-1vsBd3-1	CG
Bd1	21006732	21007276	545	84	0.0615527	0.941088	-0.879535	-1027.34	Bd1-1vsBd3-1	CG
Bd1	35191166	35191829	664	85	0.921809	0.0811342	0.840675	1026.94	Bd1-1vsBd3-1	CG
Bd1	32142116	32142728	613	61	0.0515849	0.919287	-0.867703	-1024.69	Bd1-1vsBd3-1	CG
Bd1	53207061	53207624	564	139	0.81871	0.0532693	0.765441	1024.67	Bd1-1vsBd3-1	CG
Bd1	23698639	23699515	877	145	0.0625732	0.717239	-0.654666	-1020.86	Bd1-1vsBd3-1	CG
Bd1	33261708	33262187	480	81	0.942145	0.0533274	0.888818	1016.29	Bd1-1vsBd3-1	CG
Bd1	34660161	34661062	902	73	0.969708	0.0663248	0.903383	1016.11	Bd1-1vsBd3-1	CG
Bd1	64069221	64069734	514	76	0.944031	0.0579975	0.886033	1013.43	Bd1-1vsBd3-1	CG
Bd1	3510915	3511724	810	90	0.110955	0.9352	-0.824245	-1012.78	Bd1-1vsBd3-1	CG
Bd1	41049756	41050372	617	97	0.959806	0.0805414	0.879265	1007.51	Bd1-1vsBd3-1	CG
Bd1	25482608	25482880	273	55	0.0462679	0.963994	-0.917726	-1007.1	Bd1-1vsBd3-1	CG
Bd1	55455289	55456310	1022	99	0.892675	0.0624146	0.83026	1002.96	Bd1-1vsBd3-1	CG
Bd1	28716948	28717390	443	116	0.0531234	0.865424	-0.8123	-1001.28	Bd1-1vsBd3-1	CG
Bd1	63721323	63723291	1969	78	0.951623	0.0586202	0.893003	999.91	Bd1-1vsBd3-1	CG
Bd1	27990423	27990962	540	81	0.89401	0.0798459	0.814164	999.623	Bd1-1vsBd3-1	CG
Bd1	11283811	11284320	510	71	0.0572268	0.934414	-0.877187	-998.902	Bd1-1vsBd3-1	CG
Bd1	55504961	55505662	702	79	0.132832	0.953648	-0.820816	-996.018	Bd1-1vsBd3-1	CG
Bd1	53570874	53571489	616	57	0.0618314	0.876043	-0.814212	-995.11	Bd1-1vsBd3-1	CG
Bd1	48194143	48194488	346	89	0.908771	0.0451289	0.863642	994.619	Bd1-1vsBd3-1	CG
Bd1	24046899	24047513	615	100	0.930335	0.158091	0.772243	992.401	Bd1-1vsBd3-1	CG
Bd1	46781699	46782071	373	85	0.131202	0.931687	-0.800485	-992.097	Bd1-1vsBd3-1	CG
Bd1	53002310	53002989	680	92	0.925355	0.126951	0.798404	987.725	Bd1-1vsBd3-1	CG
Bd1	42210782	42211327	546	74	0.936937	0.0674867	0.869451	987.065	Bd1-1vsBd3-1	CG
Bd1	16767007	16767630	624	65	0.0463739	0.93093	-0.884556	-984.322	Bd1-1vsBd3-1	CG
Bd1	10897844	10898342	499	94	0.140947	0.921508	-0.780561	-981.981	Bd1-1vsBd3-1	CG
Bd1	9344472	9345182	711	78	0.0661219	0.881763	-0.815641	-980.059	Bd1-1vsBd3-1	CG
Bd1	7213734	7214172	439	62	0.92355	0.0766996	0.84685	977.199	Bd1-1vsBd3-1	CG
Bd1	71985213	71985974	762	91	0.0824471	0.907952	-0.825505	-974.259	Bd1-1vsBd3-1	CG
Bd1	27782702	27783585	884	74	0.105648	0.935509	-0.829861	-970.405	Bd1-1vsBd3-1	CG
Bd1	23379100	23379997	898	86	0.929095	0.0861582	0.842937	967.857	Bd1-1vsBd3-1	CG
Bd1	28710881	28711244	364	73	0.951735	0.0602415	0.891493	965.572	Bd1-1vsBd3-1	CG
Bd1	17275009	17275562	554	64	0.0543919	0.912886	-0.858494	-960.419	Bd1-1vsBd3-1	CG
Bd1	50211772	50212329	558	80	0.928083	0.0647357	0.863348	959.838	Bd1-1vsBd3-1	CG
Bd1	57490385	57490923	539	77	0.0374564	0.892732	-0.855276	-959.007	Bd1-1vsBd3-1	CG
Bd1	34311879	34312386	508	65	0.914173	0.0750769	0.839096	956.765	Bd1-1vsBd3-1	CG
Bd1	33902438	33902793	356	50	0.941605	0.0487082	0.892897	956.385	Bd1-1vsBd3-1	CG
Bd1	54158328	54159333	1006	147	0.857409	0.16928	0.688129	956.092	Bd1-1vsBd3-1	CG
Bd1	34629015	34629327	313	65	0.949452	0.0397255	0.909726	955.884	Bd1-1vsBd3-1	CG
Bd1	14909128	14909823	696	87	0.87971	0.0622497	0.817461	952.522	Bd1-1vsBd3-1	CG
Bd1	9177284	9178061	778	74	0.0683768	0.939904	-0.871527	-951.7	Bd1-1vsBd3-1	CG
Bd1	71115388	71116125	738	93	0.959592	0.100423	0.859168	951.564	Bd1-1vsBd3-1	CG
Bd1	57514938	57515189	252	53	0.0665301	0.883843	-0.817313	-951.035	Bd1-1vsBd3-1	CG
Bd1	18263766	18264136	371	91	0.0397707	0.845574	-0.805804	-948.182	Bd1-1vsBd3-1	CG
Bd1	45553583	45554097	515	62	0.968374	0.0565887	0.911786	947.946	Bd1-1vsBd3-1	CG
Bd1	55835244	55835734	491	71	0.888229	0.0729651	0.815264	944.475	Bd1-1vsBd3-1	CG
Bd1	47287041	47288095	1055	94	0.946019	0.094222	0.851797	939.553	Bd1-1vsBd3-1	CG
Bd1	71348532	71348855	324	48	0.0435666	0.947664	-0.904097	-938.372	Bd1-1vsBd3-1	CG
Bd1	33863667	33864195	529	67	0.934825	0.0697804	0.865045	934.872	Bd1-1vsBd3-1	CG
Bd1	20085864	20086517	654	68	0.897982	0.140692	0.75729	933.3	Bd1-1vsBd3-1	CG
Bd1	9668180	9668752	573	113	0.927198	0.101945	0.825253	933.26	Bd1-1vsBd3-1	CG
Bd1	34439920	34440491	572	77	0.94574	0.112444	0.833295	932.967	Bd1-1vsBd3-1	CG
Bd1	52994835	52995836	1002	92	0.8854	0.061208	0.824192	932.795	Bd1-1vsBd3-1	CG
Bd1	49033809	49034280	472	64	0.0403055	0.880316	-0.840011	-932.095	Bd1-1vsBd3-1	CG
Bd1	47284382	47285149	768	61	0.960527	0.0526757	0.907851	931.281	Bd1-1vsBd3-1	CG
Bd1	15761083	15761645	563	83	0.102937	0.848952	-0.746015	-929.836	Bd1-1vsBd3-1	CG
Bd1	3261160	3261537	378	108	0.0510868	0.780427	-0.72934	-926.619	Bd1-1vsBd3-1	CG
Bd1	55162849	55163302	454	78	0.904449	0.153773	0.750677	920.343	Bd1-1vsBd3-1	CG
Bd1	74818297	74819333	1037	56	0.0511822	0.911031	-0.859849	-918.462	Bd1-1vsBd3-1	CG
Bd1	24878648	24879070	423	79	0.0617615	0.870953	-0.809192	-918.084	Bd1-1vsBd3-1	CG
Bd1	57291403	57292045	643	58	0.961821	0.0645262	0.897295	916.893	Bd1-1vsBd3-1	CG
Bd1	1394593	1395245	653	63	0.0532967	0.949001	-0.895704	-914.553	Bd1-1vsBd3-1	CG
Bd1	68417035	68417578	544	92	0.853611	0.0737341	0.779876	913.96	Bd1-1vsBd3-1	CG
Bd1	3707788	3708363	576	83	0.937592	0.0677899	0.869802	913.049	Bd1-1vsBd3-1	CG
Bd1	66554567	66554899	333	73	0.929406	0.0954107	0.833995	909.867	Bd1-1vsBd3-1	CG
Bd1	57125510	57126124	615	50	0.956247	0.0397147	0.916532	909.771	Bd1-1vsBd3-1	CG
Bd1	13763045	13763864	820	76	0.0747573	0.930327	-0.855569	-909.722	Bd1-1vsBd3-1	CG
Bd1	41292403	41292796	394	71	0.030226	0.908268	-0.878042	-898.504	Bd1-1vsBd3-1	CG
Bd1	67049862	67050723	862	87	0.944539	0.0878604	0.856679	896.999	Bd1-1vsBd3-1	CG
Bd1	34113435	34113901	467	61	0.871557	0.138735	0.732822	896.597	Bd1-1vsBd3-1	CG
Bd1	41709196	41709640	445	83	0.11155	0.939084	-0.827534	-895.76	Bd1-1vsBd3-1	CG
Bd1	26206296	26206924	629	74	0.940856	0.0736473	0.867209	891.407	Bd1-1vsBd3-1	CG
Bd1	68747501	68748114	614	91	0.956977	0.0831464	0.873831	890.354	Bd1-1vsBd3-1	CG
Bd1	3569010	3569837	828	111	0.0709214	0.8113	-0.740379	-886.022	Bd1-1vsBd3-1	CG
Bd1	56879080	56879787	708	67	0.880239	0.0512868	0.828952	885.373	Bd1-1vsBd3-1	CG
Bd1	56127677	56128049	373	89	0.0681928	0.904108	-0.835916	-885.296	Bd1-1vsBd3-1	CG
Bd1	56511860	56512277	418	69	0.0353431	0.884617	-0.849274	-884.882	Bd1-1vsBd3-1	CG
Bd1	34237562	34237962	401	146	0.0382144	0.699149	-0.660934	-882.112	Bd1-1vsBd3-1	CG
Bd1	43872728	43873499	772	53	0.05939	0.946384	-0.886994	-882.069	Bd1-1vsBd3-1	CG
Bd1	38801549	38801857	309	58	0.0850705	0.905848	-0.820777	-880.128	Bd1-1vsBd3-1	CG
Bd1	736117	736708	592	69	0.933825	0.0833197	0.850505	879.767	Bd1-1vsBd3-1	CG
Bd1	23342772	23343152	381	59	0.947751	0.0587085	0.889043	878.261	Bd1-1vsBd3-1	CG
Bd1	27082277	27082652	376	62	0.888901	0.0672148	0.821687	877.56	Bd1-1vsBd3-1	CG
Bd1	17017075	17017712	638	128	0.890527	0.12828	0.762246	877.407	Bd1-1vsBd3-1	CG
Bd1	1384645	1384898	254	49	0.973222	0.0683929	0.904829	875.475	Bd1-1vsBd3-1	CG
Bd1	48876378	48877191	814	75	0.128109	0.931163	-0.803054	-874.391	Bd1-1vsBd3-1	CG
Bd1	21257703	21258375	673	70	0.960716	0.0702513	0.890465	870.602	Bd1-1vsBd3-1	CG
Bd1	47699226	47699507	282	40	0.034148	0.968918	-0.93477	-865.93	Bd1-1vsBd3-1	CG
Bd1	11323303	11323775	473	76	0.0631826	0.917312	-0.854129	-863.826	Bd1-1vsBd3-1	CG
Bd1	69991698	69991979	282	84	0.0897453	0.949957	-0.860212	-862.618	Bd1-1vsBd3-1	CG
Bd1	53231630	53232024	395	72	0.902357	0.0797048	0.822652	862.482	Bd1-1vsBd3-1	CG
Bd1	58471852	58472104	253	70	0.0604674	0.925913	-0.865445	-859.809	Bd1-1vsBd3-1	CG
Bd1	12168765	12169287	523	66	0.926092	0.0574814	0.868611	859.805	Bd1-1vsBd3-1	CG
Bd1	60740276	60740682	407	66	0.0730433	0.951981	-0.878938	-856.344	Bd1-1vsBd3-1	CG
Bd1	57816464	57816967	504	61	0.941098	0.118808	0.82229	853.571	Bd1-1vsBd3-1	CG
Bd1	23707641	23708207	567	80	0.855468	0.130341	0.725128	850.7	Bd1-1vsBd3-1	CG
Bd1	27777447	27778371	925	57	0.0603632	0.936783	-0.87642	-849.825	Bd1-1vsBd3-1	CG
Bd1	40930983	40931497	515	56	0.962756	0.0780286	0.884727	847.601	Bd1-1vsBd3-1	CG
Bd1	69467581	69468241	661	59	0.0604015	0.943042	-0.882641	-845.226	Bd1-1vsBd3-1	CG
Bd1	53307932	53308313	382	46	0.934884	0.0975392	0.837344	839.099	Bd1-1vsBd3-1	CG
Bd1	40665016	40665675	660	75	0.930572	0.114707	0.815865	836.095	Bd1-1vsBd3-1	CG
Bd1	69097214	69097519	306	67	0.941193	0.108482	0.832711	835.762	Bd1-1vsBd3-1	CG
Bd1	55744666	55745365	700	81	0.944764	0.0996133	0.84515	835.235	Bd1-1vsBd3-1	CG
Bd1	23274021	23274350	330	71	0.050877	0.933044	-0.882167	-835.051	Bd1-1vsBd3-1	CG
Bd1	28203267	28203677	411	68	0.0637354	0.884358	-0.820622	-834.746	Bd1-1vsBd3-1	CG
Bd1	23469459	23469768	310	44	0.964291	0.0499829	0.914308	834.314	Bd1-1vsBd3-1	CG
Bd1	17128698	17129183	486	76	0.885729	0.124262	0.761466	833.183	Bd1-1vsBd3-1	CG
Bd1	22406112	22406845	734	65	0.934325	0.0665405	0.867784	831.568	Bd1-1vsBd3-1	CG
Bd1	56042355	56042750	396	64	0.133709	0.889602	-0.755893	-829.714	Bd1-1vsBd3-1	CG
Bd1	62214469	62215000	532	63	0.0792905	0.943548	-0.864257	-829.458	Bd1-1vsBd3-1	CG
Bd1	60875372	60875858	487	52	0.0849612	0.957404	-0.872442	-828.616	Bd1-1vsBd3-1	CG
Bd1	11356343	11356621	279	82	0.913394	0.0927458	0.820648	824.873	Bd1-1vsBd3-1	CG
Bd1	39636866	39637242	377	49	0.907049	0.0377771	0.869272	824.197	Bd1-1vsBd3-1	CG
Bd1	52486445	52486861	417	63	0.927532	0.0527206	0.874811	817.913	Bd1-1vsBd3-1	CG
Bd1	27661233	27661536	304	58	0.0712852	0.952217	-0.880932	-815.767	Bd1-1vsBd3-1	CG
Bd1	70054472	70054948	477	69	0.0725426	0.911969	-0.839427	-814.325	Bd1-1vsBd3-1	CG
Bd1	6243375	6243947	573	58	0.963911	0.142418	0.821493	813.646	Bd1-1vsBd3-1	CG
Bd1	30390327	30390819	493	68	0.929615	0.0647538	0.864861	813.425	Bd1-1vsBd3-1	CG
Bd1	26163424	26164055	632	116	0.0452603	0.712041	-0.66678	-813.136	Bd1-1vsBd3-1	CG
Bd1	53987961	53988548	588	55	0.949522	0.0613813	0.888141	812.261	Bd1-1vsBd3-1	CG
Bd1	18140683	18141033	351	59	0.125337	0.940912	-0.815575	-808.08	Bd1-1vsBd3-1	CG
Bd1	63546820	63547657	838	64	0.935659	0.079227	0.856432	807.939	Bd1-1vsBd3-1	CG
Bd1	61556866	61557264	399	57	0.11663	0.93674	-0.820109	-805.111	Bd1-1vsBd3-1	CG
Bd1	29831542	29832006	465	70	0.0810559	0.885794	-0.804739	-803.325	Bd1-1vsBd3-1	CG
Bd1	33261301	33261645	345	68	0.96081	0.0794038	0.881406	801.89	Bd1-1vsBd3-1	CG
Bd1	20733176	20733550	375	79	0.924751	0.102035	0.822716	798.991	Bd1-1vsBd3-1	CG
Bd1	13676693	13677297	605	60	0.0588068	0.955489	-0.896682	-798.433	Bd1-1vsBd3-1	CG
Bd1	46420208	46420720	513	56	0.96331	0.0914413	0.871869	796.88	Bd1-1vsBd3-1	CG
Bd1	17612760	17612982	223	73	0.896397	0.102613	0.793784	795.86	Bd1-1vsBd3-1	CG
Bd1	61689688	61690162	475	47	0.100777	0.947122	-0.846345	-793.147	Bd1-1vsBd3-1	CG
Bd1	57321902	57322179	278	88	0.149466	0.842023	-0.692557	-790.825	Bd1-1vsBd3-1	CG
Bd1	46808280	46808649	370	61	0.939207	0.0549411	0.884266	787.838	Bd1-1vsBd3-1	CG
Bd1	55876341	55876886	546	72	0.081439	0.924421	-0.842982	-787.01	Bd1-1vsBd3-1	CG
Bd1	59647783	59648481	699	72	0.91973	0.0856034	0.834127	786.338	Bd1-1vsBd3-1	CG
Bd1	15686204	15686693	490	69	0.0818814	0.888481	-0.806599	-785.349	Bd1-1vsBd3-1	CG
Bd1	27706126	27706771	646	64	0.0543197	0.924818	-0.870499	-784.254	Bd1-1vsBd3-1	CG
Bd1	66820329	66821025	697	53	0.101479	0.948014	-0.846535	-784.056	Bd1-1vsBd3-1	CG
Bd1	52893581	52893899	319	81	0.142841	0.929962	-0.787121	-783.196	Bd1-1vsBd3-1	CG
Bd1	55942353	55942815	463	50	0.94562	0.0679718	0.877648	781.747	Bd1-1vsBd3-1	CG
Bd1	21840540	21841073	534	85	0.826844	0.0651267	0.761717	778.732	Bd1-1vsBd3-1	CG
Bd1	4165316	4165810	495	86	0.0914904	0.94308	-0.851589	-778.266	Bd1-1vsBd3-1	CG
Bd1	2760163	2760430	268	77	0.0983783	0.850225	-0.751847	-777.101	Bd1-1vsBd3-1	CG
Bd1	61781408	61781781	374	56	0.893455	0.0306461	0.862809	776.653	Bd1-1vsBd3-1	CG
Bd1	33417756	33418174	419	73	0.912025	0.0476984	0.864326	775.842	Bd1-1vsBd3-1	CG
Bd1	47739076	47739541	466	102	0.0915668	0.836359	-0.744792	-770.107	Bd1-1vsBd3-1	CG
Bd1	50408581	50409035	455	92	0.860626	0.148026	0.7126	769.707	Bd1-1vsBd3-1	CG
Bd1	41370792	41371092	301	52	0.0898093	0.956992	-0.867183	-767.681	Bd1-1vsBd3-1	CG
Bd1	60016470	60016945	476	58	0.0882498	0.941206	-0.852956	-762.675	Bd1-1vsBd3-1	CG
Bd1	28120523	28121509	987	102	0.0879208	0.831491	-0.74357	-762.498	Bd1-1vsBd3-1	CG
Bd1	57496167	57496575	409	88	0.799205	0.0823062	0.716899	762.433	Bd1-1vsBd3-1	CG
Bd1	38738012	38738254	243	57	0.955699	0.114446	0.841252	760.802	Bd1-1vsBd3-1	CG
Bd1	35020248	35020524	277	37	0.0338221	0.952656	-0.918834	-758.982	Bd1-1vsBd3-1	CG
Bd1	41798842	41799553	712	67	0.870575	0.0724872	0.798088	758.978	Bd1-1vsBd3-1	CG
Bd1	68644859	68645051	193	48	0.0381297	0.892167	-0.854037	-758.846	Bd1-1vsBd3-1	CG
Bd1	68602857	68603135	279	55	0.103905	0.93909	-0.835185	-757.916	Bd1-1vsBd3-1	CG
Bd1	57558313	57558890	578	72	0.0938867	0.877467	-0.78358	-756.1	Bd1-1vsBd3-1	CG
Bd1	43071311	43071861	551	46	0.0762691	0.949925	-0.873656	-755.87	Bd1-1vsBd3-1	CG
Bd1	3286130	3286401	272	67	0.914542	0.0825669	0.831975	752.946	Bd1-1vsBd3-1	CG
Bd1	15798084	15798403	320	62	0.0995166	0.96283	-0.863314	-750.996	Bd1-1vsBd3-1	CG
Bd1	65715473	65715971	499	51	0.909547	0.0911015	0.818446	748.868	Bd1-1vsBd3-1	CG
Bd1	42021932	42022408	477	52	0.907822	0.07515	0.832672	745.883	Bd1-1vsBd3-1	CG
Bd1	39224715	39224944	230	44	0.933412	0.0385069	0.894905	744.773	Bd1-1vsBd3-1	CG
Bd1	41799886	41800801	916	56	0.942358	0.0817935	0.860564	744.363	Bd1-1vsBd3-1	CG
Bd1	54490970	54491466	497	53	0.0882849	0.953793	-0.865508	-744.273	Bd1-1vsBd3-1	CG
Bd1	40274338	40274776	439	76	0.0463977	0.800978	-0.75458	-744.159	Bd1-1vsBd3-1	CG
Bd1	71352346	71352728	383	108	0.095183	0.827381	-0.732198	-741.744	Bd1-1vsBd3-1	CG
Bd1	834875	835460	586	57	0.909155	0.0591466	0.850009	741.583	Bd1-1vsBd3-1	CG
Bd1	11322314	11322639	326	61	0.94435	0.0796011	0.864749	741.307	Bd1-1vsBd3-1	CG
Bd1	72789661	72790429	769	64	0.914094	0.113818	0.800276	740.302	Bd1-1vsBd3-1	CG
Bd1	22840382	22840893	512	48	0.0652122	0.956533	-0.89132	-738.589	Bd1-1vsBd3-1	CG
Bd1	40928328	40928729	402	52	0.92988	0.0462422	0.883638	736.804	Bd1-1vsBd3-1	CG
Bd1	53246091	53246574	484	70	0.150464	0.934431	-0.783967	-736.289	Bd1-1vsBd3-1	CG
Bd1	20373332	20373741	410	54	0.928488	0.0564079	0.87208	736.128	Bd1-1vsBd3-1	CG
Bd1	74665914	74666255	342	55	0.0451627	0.938322	-0.89316	-735.891	Bd1-1vsBd3-1	CG
Bd1	14722225	14722574	350	51	0.939866	0.0389692	0.900897	734.191	Bd1-1vsBd3-1	CG
Bd1	2979428	2979870	443	54	0.252638	0.966435	-0.713797	-730.686	Bd1-1vsBd3-1	CG
Bd1	4808889	4809409	521	79	0.964051	0.165303	0.798748	730.628	Bd1-1vsBd3-1	CG
Bd1	20025901	20026854	954	52	0.951318	0.086058	0.86526	730.255	Bd1-1vsBd3-1	CG
Bd1	42405943	42406861	919	66	0.0717453	0.920251	-0.848506	-727.349	Bd1-1vsBd3-1	CG
Bd1	9143319	9143761	443	87	0.939109	0.247248	0.691862	726.924	Bd1-1vsBd3-1	CG
Bd1	17547926	17548242	317	52	0.0353876	0.911898	-0.876511	-726.815	Bd1-1vsBd3-1	CG
Bd1	25619674	25620157	484	60	0.781344	0.0630538	0.71829	726.634	Bd1-1vsBd3-1	CG
Bd1	6805300	6805691	392	118	0.130281	0.898532	-0.768251	-725.809	Bd1-1vsBd3-1	CG
Bd1	1343346	1343801	456	59	0.926145	0.113323	0.812822	725.723	Bd1-1vsBd3-1	CG
Bd1	45030769	45031631	863	70	0.061253	0.926486	-0.865233	-722.023	Bd1-1vsBd3-1	CG
Bd1	64303506	64304106	601	65	0.121488	0.931249	-0.809762	-715.113	Bd1-1vsBd3-1	CG
Bd1	57817476	57818059	584	77	0.913398	0.0993091	0.814089	714.554	Bd1-1vsBd3-1	CG
Bd1	22354253	22354740	488	78	0.0845036	0.887182	-0.802679	-713.874	Bd1-1vsBd3-1	CG
Bd1	250349	251321	973	93	0.907714	0.0887643	0.81895	713.848	Bd1-1vsBd3-1	CG
Bd1	4769153	4769763	611	80	0.0722688	0.864364	-0.792095	-712.627	Bd1-1vsBd3-1	CG
Bd1	53846811	53847283	473	64	0.0983834	0.849026	-0.750643	-711.44	Bd1-1vsBd3-1	CG
Bd1	27602014	27602771	758	60	0.917267	0.0516161	0.865651	710.372	Bd1-1vsBd3-1	CG
Bd1	48885308	48885542	235	44	0.936954	0.0456737	0.89128	708.017	Bd1-1vsBd3-1	CG
Bd1	55330389	55330978	590	69	0.098108	0.960976	-0.862868	-707.913	Bd1-1vsBd3-1	CG
Bd1	40807804	40808254	451	61	0.859744	0.0651882	0.794556	706.885	Bd1-1vsBd3-1	CG
Bd1	68602375	68602608	234	52	0.936444	0.0698097	0.866634	704.826	Bd1-1vsBd3-1	CG
Bd1	26278756	26279166	411	54	0.0990699	0.940738	-0.841668	-703.641	Bd1-1vsBd3-1	CG
Bd1	65368447	65368913	467	67	0.0768924	0.914729	-0.837836	-701.295	Bd1-1vsBd3-1	CG
Bd1	52933396	52933711	316	53	0.115047	0.92297	-0.807923	-701.095	Bd1-1vsBd3-1	CG
Bd1	66436670	66437129	460	44	0.934755	0.0564433	0.878312	700.698	Bd1-1vsBd3-1	CG
Bd1	55672695	55672970	276	76	0.123359	0.925678	-0.802318	-698.821	Bd1-1vsBd3-1	CG
Bd1	40571113	40571983	871	83	0.891473	0.0945603	0.796912	693.253	Bd1-1vsBd3-1	CG
Bd1	52354421	52354834	414	56	0.940929	0.0619664	0.878962	693.062	Bd1-1vsBd3-1	CG
Bd1	786894	787449	556	58	0.951966	0.134148	0.817818	692.615	Bd1-1vsBd3-1	CG
Bd1	47167899	47168254	356	88	0.767674	0.0556958	0.711978	692.452	Bd1-1vsBd3-1	CG
Bd1	57816027	57816389	363	44	0.846726	0.0332943	0.813432	690.509	Bd1-1vsBd3-1	CG
Bd1	2153921	2154225	305	42	0.946949	0.0642466	0.882702	689.909	Bd1-1vsBd3-1	CG
Bd1	502113	502981	869	78	0.769708	0.0752131	0.694495	689.722	Bd1-1vsBd3-1	CG
Bd1	20208064	20208339	276	65	0.0427819	0.909292	-0.86651	-689.434	Bd1-1vsBd3-1	CG
Bd1	14889498	14889874	377	86	0.124447	0.789893	-0.665446	-688.612	Bd1-1vsBd3-1	CG
Bd1	832291	832989	699	52	0.944788	0.0490747	0.895713	687.728	Bd1-1vsBd3-1	CG
Bd1	503369	503814	446	90	0.619302	0.0524748	0.566828	684.494	Bd1-1vsBd3-1	CG
Bd1	55429654	55430003	350	40	0.0486819	0.955011	-0.906329	-684.23	Bd1-1vsBd3-1	CG
Bd1	29773448	29773736	289	55	0.04791	0.929827	-0.881917	-681.522	Bd1-1vsBd3-1	CG
Bd1	12966418	12966724	307	69	0.871676	0.0568526	0.814823	681.305	Bd1-1vsBd3-1	CG
Bd1	46084692	46085264	573	53	0.0733063	0.931053	-0.857746	-680.463	Bd1-1vsBd3-1	CG
Bd1	2640378	2640747	370	63	0.958771	0.197039	0.761733	680.387	Bd1-1vsBd3-1	CG
Bd1	61519484	61520500	1017	84	0.947861	0.256128	0.691733	678.28	Bd1-1vsBd3-1	CG
Bd1	21008009	21008287	279	64	0.957269	0.0630741	0.894195	677.127	Bd1-1vsBd3-1	CG
Bd1	20025027	20025537	511	31	0.954547	0.0602429	0.894304	677.05	Bd1-1vsBd3-1	CG
Bd1	8557231	8557500	270	44	0.910277	0.0449831	0.865294	676.904	Bd1-1vsBd3-1	CG
Bd1	58895078	58895644	567	72	0.95023	0.24076	0.709471	674.945	Bd1-1vsBd3-1	CG
Bd1	44906549	44906867	319	48	0.0479594	0.92366	-0.8757	-674.032	Bd1-1vsBd3-1	CG
Bd1	38389731	38390738	1008	72	0.0825242	0.948805	-0.866281	-673.387	Bd1-1vsBd3-1	CG
Bd1	59667819	59668239	421	66	0.844572	0.0474084	0.797164	671.157	Bd1-1vsBd3-1	CG
Bd1	47756426	47756976	551	67	0.193474	0.891766	-0.698292	-671.084	Bd1-1vsBd3-1	CG
Bd1	67134916	67135700	785	63	0.909182	0.090492	0.81869	670.89	Bd1-1vsBd3-1	CG
Bd1	56739886	56740652	767	73	0.0912663	0.899215	-0.807949	-670.697	Bd1-1vsBd3-1	CG
Bd1	7510727	7510994	268	37	0.057912	0.964396	-0.906484	-668.087	Bd1-1vsBd3-1	CG
Bd1	42633914	42634490	577	51	0.0804019	0.942521	-0.862119	-667.598	Bd1-1vsBd3-1	CG
Bd1	1035658	1036070	413	39	0.941345	0.0554975	0.885848	667.31	Bd1-1vsBd3-1	CG
Bd1	74758427	74759398	972	60	0.851758	0.0824822	0.769275	666.77	Bd1-1vsBd3-1	CG
Bd1	20197440	20197804	365	69	0.887629	0.304548	0.583081	666.733	Bd1-1vsBd3-1	CG
Bd1	58089543	58089807	265	54	0.0807652	0.937996	-0.857231	-665.961	Bd1-1vsBd3-1	CG
Bd1	50640175	50640579	405	64	0.0560255	0.87411	-0.818085	-665.707	Bd1-1vsBd3-1	CG
Bd1	24571237	24571525	289	49	0.265742	0.891834	-0.626092	-665.159	Bd1-1vsBd3-1	CG
Bd1	7510297	7510664	368	40	0.0822965	0.96284	-0.880543	-664.603	Bd1-1vsBd3-1	CG
Bd1	50206626	50207123	498	66	0.912977	0.259033	0.653944	664.153	Bd1-1vsBd3-1	CG
Bd1	40291002	40291548	547	63	0.935378	0.158638	0.77674	663.661	Bd1-1vsBd3-1	CG
Bd1	21239399	21239876	478	60	0.0766054	0.945803	-0.869198	-662.915	Bd1-1vsBd3-1	CG
Bd1	47201669	47202058	390	44	0.0282492	0.933402	-0.905153	-662.471	Bd1-1vsBd3-1	CG
Bd1	17133692	17134099	408	64	0.884552	0.087149	0.797403	662.422	Bd1-1vsBd3-1	CG
Bd1	25659357	25659836	480	116	0.0392444	0.620014	-0.580769	-662.042	Bd1-1vsBd3-1	CG
Bd1	49265969	49266630	662	90	0.21948	0.813501	-0.594021	-658.064	Bd1-1vsBd3-1	CG
Bd1	58170038	58170386	349	45	0.946148	0.105975	0.840173	657.506	Bd1-1vsBd3-1	CG
Bd1	27603245	27603643	399	65	0.0595492	0.929172	-0.869622	-655.719	Bd1-1vsBd3-1	CG
Bd1	58110309	58110747	439	111	0.0350018	0.694812	-0.65981	-655.531	Bd1-1vsBd3-1	CG
Bd1	64118454	64119052	599	68	0.931849	0.0859548	0.845894	654.423	Bd1-1vsBd3-1	CG
Bd1	68257823	68258260	438	38	0.965836	0.0528727	0.912963	653.842	Bd1-1vsBd3-1	CG
Bd1	14795145	14795416	272	50	0.968169	0.0918954	0.876274	651.713	Bd1-1vsBd3-1	CG
Bd1	22159409	22159819	411	64	0.874782	0.0655839	0.809198	650.488	Bd1-1vsBd3-1	CG
Bd1	23394992	23395401	410	113	0.837612	0.159536	0.678076	650.382	Bd1-1vsBd3-1	CG
Bd1	67175504	67175958	455	47	0.0457091	0.911501	-0.865792	-648.849	Bd1-1vsBd3-1	CG
Bd1	15115661	15116138	478	48	0.0651324	0.91904	-0.853908	-647.819	Bd1-1vsBd3-1	CG
Bd1	73636726	73637111	386	59	0.181873	0.912747	-0.730874	-647.593	Bd1-1vsBd3-1	CG
Bd1	504148	504552	405	59	0.843689	0.180167	0.663522	647.13	Bd1-1vsBd3-1	CG
Bd1	61379560	61380302	743	52	0.943685	0.0741817	0.869503	646.526	Bd1-1vsBd3-1	CG
Bd1	69425	70067	643	42	0.0478897	0.948895	-0.901005	-646.276	Bd1-1vsBd3-1	CG
Bd1	14865883	14866334	452	67	0.857792	0.142422	0.71537	641.018	Bd1-1vsBd3-1	CG
Bd1	41800873	41801411	539	41	0.954721	0.120054	0.834667	640.527	Bd1-1vsBd3-1	CG
Bd1	8977808	8978355	548	61	0.100596	0.940422	-0.839826	-640.28	Bd1-1vsBd3-1	CG
Bd1	23556050	23556841	792	161	0.30953	0.685598	-0.376068	-636.307	Bd1-1vsBd3-1	CG
Bd1	955881	956191	311	70	0.0375383	0.800092	-0.762554	-636.203	Bd1-1vsBd3-1	CG
Bd1	71138414	71138763	350	51	0.927052	0.0990367	0.828016	633.202	Bd1-1vsBd3-1	CG
Bd1	18523284	18523950	667	49	0.946887	0.0616678	0.885219	632.699	Bd1-1vsBd3-1	CG
Bd1	55456530	55457249	720	82	0.90792	0.100906	0.807013	632.442	Bd1-1vsBd3-1	CG
Bd1	94934	95257	324	38	0.0372345	0.881246	-0.844011	-631.197	Bd1-1vsBd3-1	CG
Bd1	16414984	16416148	1165	52	0.0675587	0.894846	-0.827288	-630.073	Bd1-1vsBd3-1	CG
Bd1	57818134	57818555	422	54	0.877118	0.0958259	0.781292	629.485	Bd1-1vsBd3-1	CG
Bd1	47307365	47307833	469	51	0.94819	0.0759571	0.872233	627.47	Bd1-1vsBd3-1	CG
Bd1	10939795	10940262	468	60	0.946919	0.0889053	0.858014	626.792	Bd1-1vsBd3-1	CG
Bd1	15686754	15687109	356	74	0.0433907	0.775491	-0.732101	-622.147	Bd1-1vsBd3-1	CG
Bd1	58369000	58369327	328	43	0.0402587	0.933852	-0.893593	-619.554	Bd1-1vsBd3-1	CG
Bd1	26642561	26643052	492	59	0.0547873	0.88401	-0.829223	-618.426	Bd1-1vsBd3-1	CG
Bd1	25404218	25405215	998	65	0.201232	0.917843	-0.716611	-618.04	Bd1-1vsBd3-1	CG
Bd1	53698666	53699159	494	87	0.873613	0.0847576	0.788856	617.677	Bd1-1vsBd3-1	CG
Bd1	57082439	57082629	191	64	0.929551	0.0843424	0.845209	616.561	Bd1-1vsBd3-1	CG
Bd1	43160828	43161239	412	63	0.878921	0.106862	0.772059	614.67	Bd1-1vsBd3-1	CG
Bd1	4509845	4510372	528	65	0.875847	0.0650935	0.810754	614.115	Bd1-1vsBd3-1	CG
Bd1	102482	103361	880	61	0.904683	0.0731086	0.831575	613.928	Bd1-1vsBd3-1	CG
Bd1	62597963	62598924	962	50	0.0773303	0.935804	-0.858474	-613.633	Bd1-1vsBd3-1	CG
Bd1	21815558	21816177	620	43	0.941939	0.0654855	0.876454	612.263	Bd1-1vsBd3-1	CG
Bd1	68257169	68257751	583	48	0.953638	0.0680868	0.885552	611.864	Bd1-1vsBd3-1	CG
Bd1	68605622	68606192	571	56	0.0970274	0.918165	-0.821137	-610.647	Bd1-1vsBd3-1	CG
Bd1	28716554	28716852	299	38	0.0278474	0.886856	-0.859008	-610.275	Bd1-1vsBd3-1	CG
Bd1	50116215	50116904	690	67	0.867617	0.105896	0.761721	610.25	Bd1-1vsBd3-1	CG
Bd1	17841493	17841825	333	43	0.908814	0.0511651	0.857649	610.197	Bd1-1vsBd3-1	CG
Bd1	20229826	20230289	464	51	0.913101	0.0678054	0.845295	609.842	Bd1-1vsBd3-1	CG
Bd1	55566088	55566352	265	44	0.88994	0.0798494	0.810091	607.124	Bd1-1vsBd3-1	CG
Bd1	18941214	18941686	473	53	0.0850941	0.927915	-0.842821	-606.014	Bd1-1vsBd3-1	CG
Bd1	4740254	4740618	365	58	0.0518096	0.886957	-0.835147	-605.956	Bd1-1vsBd3-1	CG
Bd1	25364857	25365234	378	71	0.0563831	0.835167	-0.778784	-605.929	Bd1-1vsBd3-1	CG
Bd1	8577255	8577478	224	33	0.0592191	0.908423	-0.849204	-605.637	Bd1-1vsBd3-1	CG
Bd1	48038718	48039316	599	74	0.0762749	0.694741	-0.618466	-605.087	Bd1-1vsBd3-1	CG
Bd1	68795226	68795738	513	47	0.906073	0.0547046	0.851368	605.062	Bd1-1vsBd3-1	CG
Bd1	13377754	13377923	170	31	0.0440099	0.941763	-0.897753	-602.823	Bd1-1vsBd3-1	CG
Bd1	61294905	61295214	310	37	0.965781	0.0662506	0.89953	602.198	Bd1-1vsBd3-1	CG
Bd1	25893792	25894418	627	50	0.0735569	0.936702	-0.863145	-602.192	Bd1-1vsBd3-1	CG
Bd1	13212864	13213704	841	45	0.930223	0.0771795	0.853044	601.44	Bd1-1vsBd3-1	CG
Bd1	6475473	6475885	413	64	0.0755819	0.919068	-0.843486	-601.137	Bd1-1vsBd3-1	CG
Bd1	23034871	23035272	402	86	0.640466	0.0345061	0.60596	599.045	Bd1-1vsBd3-1	CG
Bd1	27474394	27474805	412	55	0.0553048	0.885711	-0.830406	-597.025	Bd1-1vsBd3-1	CG
Bd1	18770245	18771102	858	58	0.958685	0.244052	0.714632	596.461	Bd1-1vsBd3-1	CG
Bd1	52889766	52890301	536	60	0.0781133	0.935969	-0.857855	-596.318	Bd1-1vsBd3-1	CG
Bd1	50975257	50975494	238	58	0.876086	0.0697667	0.806319	595.692	Bd1-1vsBd3-1	CG
Bd1	49059491	49059744	254	69	0.924454	0.0947376	0.829716	594.695	Bd1-1vsBd3-1	CG
Bd1	50503365	50503786	422	43	0.965451	0.089426	0.876025	594.247	Bd1-1vsBd3-1	CG
Bd1	61007328	61007507	180	34	0.0685711	0.967323	-0.898752	-594.125	Bd1-1vsBd3-1	CG
Bd1	48755961	48756801	841	59	0.0571252	0.925715	-0.868589	-594.017	Bd1-1vsBd3-1	CG
Bd1	22839515	22840008	494	51	0.0797979	0.923543	-0.843745	-593.312	Bd1-1vsBd3-1	CG
Bd1	19812424	19812984	561	48	0.945099	0.0816192	0.86348	588.769	Bd1-1vsBd3-1	CG
Bd1	50290067	50290341	275	66	0.934858	0.111764	0.823094	588.57	Bd1-1vsBd3-1	CG
Bd1	68603216	68603558	343	44	0.0605555	0.938261	-0.877705	-588.457	Bd1-1vsBd3-1	CG
Bd1	49371651	49371954	304	51	0.0698508	0.937599	-0.867748	-587.829	Bd1-1vsBd3-1	CG
Bd1	50328645	50329129	485	54	0.0919408	0.874131	-0.78219	-587.483	Bd1-1vsBd3-1	CG
Bd1	49033529	49033728	200	37	0.107862	0.884767	-0.776906	-587.135	Bd1-1vsBd3-1	CG
Bd1	11479454	11479824	371	60	0.896017	0.0629071	0.833109	587.048	Bd1-1vsBd3-1	CG
Bd1	49098335	49099190	856	60	0.904418	0.072536	0.831882	586.084	Bd1-1vsBd3-1	CG
Bd1	72529413	72529752	340	46	0.0984355	0.948034	-0.849598	-586.052	Bd1-1vsBd3-1	CG
Bd1	40624279	40624602	324	42	0.919789	0.0763713	0.843417	585.57	Bd1-1vsBd3-1	CG
Bd1	8381030	8381702	673	57	0.917792	0.068283	0.849509	585.19	Bd1-1vsBd3-1	CG
Bd1	48019545	48019847	303	49	0.0713316	0.946282	-0.87495	-584.446	Bd1-1vsBd3-1	CG
Bd1	68709833	68710156	324	57	0.0667905	0.881682	-0.814892	-583.073	Bd1-1vsBd3-1	CG
Bd1	11484120	11484641	522	70	0.0537718	0.812206	-0.758434	-582.98	Bd1-1vsBd3-1	CG
Bd1	58410474	58410860	387	29	0.0356383	0.972227	-0.936588	-582.928	Bd1-1vsBd3-1	CG
Bd1	28667918	28668419	502	74	0.906389	0.11849	0.787899	580.916	Bd1-1vsBd3-1	CG
Bd1	39335874	39336309	436	52	0.945503	0.0832694	0.862234	580.833	Bd1-1vsBd3-1	CG
Bd1	30777070	30777474	405	43	0.0991107	0.945807	-0.846697	-580.37	Bd1-1vsBd3-1	CG
Bd1	31826917	31827283	367	38	0.118592	0.957406	-0.838814	-578.916	Bd1-1vsBd3-1	CG
Bd1	47285409	47286798	1390	95	0.935585	0.11658	0.819004	578.436	Bd1-1vsBd3-1	CG
Bd1	41241401	41241780	380	48	0.100567	0.935191	-0.834624	-578.148	Bd1-1vsBd3-1	CG
Bd1	28597586	28597979	394	80	0.943709	0.160202	0.783507	576.557	Bd1-1vsBd3-1	CG
Bd1	16160615	16161563	949	57	0.934295	0.0784928	0.855802	575.553	Bd1-1vsBd3-1	CG
Bd1	47679385	47680047	663	50	0.919912	0.177133	0.742779	574.006	Bd1-1vsBd3-1	CG
Bd1	68439524	68440258	735	51	0.932935	0.0719209	0.861014	571.202	Bd1-1vsBd3-1	CG
Bd1	29779836	29780461	626	54	0.934516	0.0658638	0.868653	570.993	Bd1-1vsBd3-1	CG
Bd1	34290572	34290998	427	41	0.89287	0.0507589	0.842111	570.601	Bd1-1vsBd3-1	CG
Bd1	25983870	25984229	360	74	0.065407	0.859178	-0.793771	-568.826	Bd1-1vsBd3-1	CG
Bd1	58250524	58250774	251	40	0.948633	0.275846	0.672787	568.715	Bd1-1vsBd3-1	CG
Bd1	4781252	4781822	571	51	0.940686	0.0742056	0.866481	568.547	Bd1-1vsBd3-1	CG
Bd1	45810920	45811354	435	54	0.130144	0.885556	-0.755412	-566.652	Bd1-1vsBd3-1	CG
Bd1	21437774	21438322	549	57	0.930505	0.091563	0.838942	565.843	Bd1-1vsBd3-1	CG
Bd1	61465651	61465989	339	47	0.920476	0.0492614	0.871214	565.719	Bd1-1vsBd3-1	CG
Bd1	49829282	49829570	289	39	0.935039	0.0615284	0.87351	565.591	Bd1-1vsBd3-1	CG
Bd1	27705453	27706002	550	74	0.0623215	0.802237	-0.739915	-564.207	Bd1-1vsBd3-1	CG
Bd1	67074225	67074631	407	30	0.941969	0.0982816	0.843687	563.5	Bd1-1vsBd3-1	CG
Bd1	13898080	13898537	458	57	0.047248	0.847902	-0.800654	-563.389	Bd1-1vsBd3-1	CG
Bd1	34344362	34344656	295	45	0.877518	0.0717729	0.805745	562.362	Bd1-1vsBd3-1	CG
Bd1	53496042	53496272	231	45	0.0602703	0.911515	-0.851245	-560.77	Bd1-1vsBd3-1	CG
Bd1	17867354	17867556	203	70	0.0418552	0.807111	-0.765255	-560.391	Bd1-1vsBd3-1	CG
Bd1	57982050	57982484	435	64	0.0411559	0.892231	-0.851075	-559.918	Bd1-1vsBd3-1	CG
Bd1	22056817	22057097	281	62	0.920827	0.0917022	0.829125	559.574	Bd1-1vsBd3-1	CG
Bd1	53788242	53788415	174	29	0.964083	0.0537597	0.910323	558.881	Bd1-1vsBd3-1	CG
Bd1	1588490	1588900	411	56	0.0894891	0.909924	-0.820435	-558.031	Bd1-1vsBd3-1	CG
Bd1	66765829	66766429	601	43	0.948009	0.058889	0.88912	557.395	Bd1-1vsBd3-1	CG
Bd1	16637405	16637858	454	72	0.958101	0.154375	0.803726	556.726	Bd1-1vsBd3-1	CG
Bd1	2279904	2280419	516	65	0.0498548	0.749529	-0.699674	-556.624	Bd1-1vsBd3-1	CG
Bd1	46135596	46135864	269	39	0.952275	0.0694488	0.882826	555.616	Bd1-1vsBd3-1	CG
Bd1	35645511	35645965	455	42	0.90711	0.0684985	0.838611	555.586	Bd1-1vsBd3-1	CG
Bd1	11319794	11320080	287	77	0.685579	0.0419573	0.643622	555.074	Bd1-1vsBd3-1	CG
Bd1	8668298	8668650	353	69	0.667584	0.0481639	0.61942	554.917	Bd1-1vsBd3-1	CG
Bd1	55090634	55091358	725	48	0.0704605	0.953246	-0.882786	-553.317	Bd1-1vsBd3-1	CG
Bd1	33995473	33995976	504	33	0.0383265	0.956752	-0.918426	-552.442	Bd1-1vsBd3-1	CG
Bd1	11284544	11284839	296	45	0.0675822	0.925385	-0.857803	-552.189	Bd1-1vsBd3-1	CG
Bd1	58079763	58080263	501	68	0.0795168	0.866467	-0.78695	-549.616	Bd1-1vsBd3-1	CG
Bd1	4249857	4250390	534	56	0.829304	0.0512918	0.778012	547.978	Bd1-1vsBd3-1	CG
Bd1	68813806	68814455	650	67	0.0992377	0.893162	-0.793925	-547.932	Bd1-1vsBd3-1	CG
Bd1	43472211	43472529	319	47	0.0689289	0.910627	-0.841698	-547.389	Bd1-1vsBd3-1	CG
Bd1	12434733	12435057	325	36	0.137815	0.946902	-0.809086	-547.168	Bd1-1vsBd3-1	CG
Bd1	68601470	68601800	331	61	0.901414	0.0863107	0.815103	545.52	Bd1-1vsBd3-1	CG
Bd1	23324194	23324419	226	55	0.0881368	0.936981	-0.848845	-544.143	Bd1-1vsBd3-1	CG
Bd1	6748043	6748300	258	37	0.926542	0.0847104	0.841832	544.103	Bd1-1vsBd3-1	CG
Bd1	24329019	24329411	393	40	0.0450729	0.884355	-0.839282	-543.54	Bd1-1vsBd3-1	CG
Bd1	7104219	7104642	424	43	0.0910775	0.952827	-0.86175	-542.998	Bd1-1vsBd3-1	CG
Bd1	3707363	3707702	340	48	0.928794	0.0921972	0.836597	541.816	Bd1-1vsBd3-1	CG
Bd1	57945275	57945649	375	45	0.892474	0.0686311	0.823843	541.803	Bd1-1vsBd3-1	CG
Bd1	17548346	17548719	374	44	0.0836644	0.956029	-0.872364	-537.127	Bd1-1vsBd3-1	CG
Bd1	54341757	54342302	546	55	0.0835892	0.927807	-0.844217	-535.51	Bd1-1vsBd3-1	CG
Bd1	3613378	3614288	911	54	0.946222	0.0907291	0.855493	535.473	Bd1-1vsBd3-1	CG
Bd1	19180359	19180634	276	48	0.882276	0.0440319	0.838244	534.79	Bd1-1vsBd3-1	CG
Bd1	22575459	22575913	455	65	0.0736808	0.936344	-0.862664	-534.338	Bd1-1vsBd3-1	CG
Bd1	4251351	4251885	535	52	0.908095	0.0589605	0.849134	533.504	Bd1-1vsBd3-1	CG
Bd1	13091513	13091915	403	46	0.902441	0.0759696	0.826472	532.245	Bd1-1vsBd3-1	CG
Bd1	11494863	11495336	474	30	0.924577	0.0610816	0.863495	531.905	Bd1-1vsBd3-1	CG
Bd1	27884494	27884923	430	48	0.868208	0.048722	0.819486	531.559	Bd1-1vsBd3-1	CG
Bd1	5969944	5970284	341	34	0.0584646	0.960889	-0.902424	-530.255	Bd1-1vsBd3-1	CG
Bd1	13353533	13353934	402	41	0.923339	0.123647	0.799693	529.76	Bd1-1vsBd3-1	CG
Bd1	52893253	52893511	259	48	0.0706667	0.876786	-0.80612	-529.645	Bd1-1vsBd3-1	CG
Bd1	53108936	53109424	489	78	0.0735954	0.822009	-0.748414	-528.441	Bd1-1vsBd3-1	CG
Bd1	39628298	39628675	378	42	0.0935891	0.95723	-0.863641	-527.797	Bd1-1vsBd3-1	CG
Bd1	52891419	52891962	544	56	0.100935	0.937991	-0.837056	-527.732	Bd1-1vsBd3-1	CG
Bd1	42322448	42322656	209	35	0.907686	0.0757836	0.831902	527.358	Bd1-1vsBd3-1	CG
Bd1	67971416	67971797	382	52	0.950954	0.0786056	0.872348	525.485	Bd1-1vsBd3-1	CG
Bd1	24038992	24039540	549	53	0.932304	0.082051	0.850253	525.223	Bd1-1vsBd3-1	CG
Bd1	20294881	20295371	491	43	0.0979367	0.894504	-0.796567	-524.913	Bd1-1vsBd3-1	CG
Bd1	32258575	32259031	457	46	0.904924	0.0732771	0.831647	524.893	Bd1-1vsBd3-1	CG
Bd1	18336146	18336501	356	50	0.895668	0.216062	0.679606	524.451	Bd1-1vsBd3-1	CG
Bd1	41690643	41690788	146	40	0.949073	0.0585215	0.890551	523.474	Bd1-1vsBd3-1	CG
Bd1	11484991	11485718	728	39	0.0828847	0.916456	-0.833571	-522.684	Bd1-1vsBd3-1	CG
Bd1	33686561	33687241	681	40	0.932819	0.0542598	0.87856	518.862	Bd1-1vsBd3-1	CG
Bd1	61792138	61792514	377	39	0.11713	0.952459	-0.835329	-516.078	Bd1-1vsBd3-1	CG
Bd1	6900137	6902064	1928	46	0.0752749	0.914274	-0.838999	-515.395	Bd1-1vsBd3-1	CG
Bd1	46673785	46674251	467	48	0.904735	0.0547942	0.849941	514.92	Bd1-1vsBd3-1	CG
Bd1	42361942	42362639	698	44	0.861898	0.0471795	0.814719	514.235	Bd1-1vsBd3-1	CG
Bd1	60409708	60410188	481	74	0.804641	0.152319	0.652322	514.206	Bd1-1vsBd3-1	CG
Bd1	48764317	48764874	558	41	0.103692	0.955357	-0.851665	-513.523	Bd1-1vsBd3-1	CG
Bd1	6476166	6476376	211	34	0.0403732	0.926994	-0.88662	-512.593	Bd1-1vsBd3-1	CG
Bd1	62461119	62461469	351	48	0.950545	0.210409	0.740135	512.468	Bd1-1vsBd3-1	CG
Bd1	73932802	73933276	475	52	0.0751803	0.910845	-0.835665	-511.036	Bd1-1vsBd3-1	CG
Bd1	56578573	56578723	151	37	0.937232	0.0554705	0.881761	510.236	Bd1-1vsBd3-1	CG
Bd1	53217305	53217505	201	35	0.0776943	0.963983	-0.886289	-508.225	Bd1-1vsBd3-1	CG
Bd1	32714688	32715116	429	50	0.896508	0.0648518	0.831656	507.42	Bd1-1vsBd3-1	CG
Bd1	11978600	11979108	509	42	0.939981	0.0678465	0.872135	505.305	Bd1-1vsBd3-1	CG
Bd1	60242628	60243374	747	39	0.927033	0.10189	0.825142	505.081	Bd1-1vsBd3-1	CG
Bd1	29669925	29670251	327	40	0.90629	0.0590367	0.847254	503.624	Bd1-1vsBd3-1	CG
Bd1	2613853	2614372	520	38	0.0376035	0.940987	-0.903383	-502.695	Bd1-1vsBd3-1	CG
Bd1	9946796	9947058	263	46	0.106836	0.881003	-0.774167	-502.421	Bd1-1vsBd3-1	CG
Bd1	56698601	56698979	379	52	0.900481	0.0642031	0.836278	502.219	Bd1-1vsBd3-1	CG
Bd1	45447778	45448340	563	37	0.922199	0.0629741	0.859225	501.914	Bd1-1vsBd3-1	CG
Bd1	33211668	33211923	256	46	0.867138	0.112159	0.754979	501.321	Bd1-1vsBd3-1	CG
Bd1	30974701	30975034	334	79	0.84292	0.117375	0.725545	501.05	Bd1-1vsBd3-1	CG
Bd1	4664960	4665321	362	42	0.04422	0.915006	-0.870786	-499.6	Bd1-1vsBd3-1	CG
Bd1	68228033	68228500	468	36	0.0767848	0.937582	-0.860797	-499.177	Bd1-1vsBd3-1	CG
Bd1	64875666	64875796	131	33	0.0450233	0.945202	-0.900179	-498.297	Bd1-1vsBd3-1	CG
Bd1	61781132	61781317	186	48	0.924051	0.106839	0.817212	497.804	Bd1-1vsBd3-1	CG
Bd1	3939235	3940345	1111	62	0.857053	0.111038	0.746014	496.922	Bd1-1vsBd3-1	CG
Bd1	20193765	20194056	292	39	0.0677527	0.890947	-0.823194	-496.195	Bd1-1vsBd3-1	CG
Bd1	17069347	17069810	464	39	0.958037	0.072897	0.88514	495.677	Bd1-1vsBd3-1	CG
Bd1	65214235	65214576	342	49	0.911085	0.0867446	0.82434	495.582	Bd1-1vsBd3-1	CG
Bd1	21359497	21359912	416	42	0.085354	0.94124	-0.855886	-494.841	Bd1-1vsBd3-1	CG
Bd1	27109023	27109699	677	42	0.0985083	0.946621	-0.848113	-494.538	Bd1-1vsBd3-1	CG
Bd1	41809712	41810475	764	53	0.901529	0.0675894	0.833939	493.575	Bd1-1vsBd3-1	CG
Bd1	34663673	34664245	573	51	0.87912	0.114746	0.764374	492.689	Bd1-1vsBd3-1	CG
Bd1	783694	783926	233	48	0.0708613	0.869113	-0.798252	-491.365	Bd1-1vsBd3-1	CG
Bd1	58526345	58526832	488	63	0.104635	0.831121	-0.726485	-491.346	Bd1-1vsBd3-1	CG
Bd1	21506344	21506697	354	72	0.6618	0.054158	0.607642	490.859	Bd1-1vsBd3-1	CG
Bd1	3467167	3467454	288	42	0.958327	0.0824557	0.875871	490.238	Bd1-1vsBd3-1	CG
Bd1	30803095	30803534	440	28	0.0588837	0.954307	-0.895423	-487.599	Bd1-1vsBd3-1	CG
Bd1	73518387	73518646	260	27	0.0829931	0.955383	-0.87239	-486.917	Bd1-1vsBd3-1	CG
Bd1	57036155	57037148	994	44	0.891701	0.0759426	0.815759	485.968	Bd1-1vsBd3-1	CG
Bd1	22923168	22923566	399	70	0.858878	0.184699	0.67418	485.259	Bd1-1vsBd3-1	CG
Bd1	28133481	28133756	276	63	0.0756104	0.842298	-0.766688	-484.263	Bd1-1vsBd3-1	CG
Bd1	35716847	35717200	354	64	0.781565	0.0475193	0.734045	483.961	Bd1-1vsBd3-1	CG
Bd1	74826464	74826907	444	30	0.93234	0.0633043	0.869035	482.467	Bd1-1vsBd3-1	CG
Bd1	8181611	8181929	319	38	0.879528	0.044479	0.835049	482.27	Bd1-1vsBd3-1	CG
Bd1	26824497	26824761	265	41	0.917415	0.0648913	0.852524	482.063	Bd1-1vsBd3-1	CG
Bd1	39876726	39877300	575	42	0.918944	0.078772	0.840172	480.94	Bd1-1vsBd3-1	CG
Bd1	27790144	27790340	197	44	0.0501523	0.923919	-0.873767	-479.226	Bd1-1vsBd3-1	CG
Bd1	27207841	27208228	388	98	0.335327	0.864335	-0.529008	-478.18	Bd1-1vsBd3-1	CG
Bd1	47936104	47936392	289	29	0.117038	0.962505	-0.845467	-477.277	Bd1-1vsBd3-1	CG
Bd1	22391264	22391534	271	58	0.0719801	0.796846	-0.724866	-476.51	Bd1-1vsBd3-1	CG
Bd1	32005128	32005645	518	59	0.910545	0.0767579	0.833788	475.438	Bd1-1vsBd3-1	CG
Bd1	31480144	31480432	289	44	0.0704006	0.930239	-0.859838	-475.346	Bd1-1vsBd3-1	CG
Bd1	34177973	34178483	511	35	0.208547	0.947691	-0.739144	-473.606	Bd1-1vsBd3-1	CG
Bd1	4780413	4780674	262	34	0.052014	0.947789	-0.895775	-473.284	Bd1-1vsBd3-1	CG
Bd1	71098250	71098477	228	51	0.0680014	0.755331	-0.68733	-472.729	Bd1-1vsBd3-1	CG
Bd1	44670767	44671271	505	53	0.930333	0.074917	0.855416	472.39	Bd1-1vsBd3-1	CG
Bd1	25112682	25112864	183	23	0.0620688	0.934191	-0.872122	-472.154	Bd1-1vsBd3-1	CG
Bd1	64373088	64373476	389	54	0.906805	0.15883	0.747976	470.398	Bd1-1vsBd3-1	CG
Bd1	43965188	43965708	521	39	0.179654	0.956093	-0.77644	-469.176	Bd1-1vsBd3-1	CG
Bd1	16356284	16356661	378	43	0.906215	0.0614832	0.844732	468.949	Bd1-1vsBd3-1	CG
Bd1	7890892	7891381	490	50	0.0941819	0.935089	-0.840907	-468.096	Bd1-1vsBd3-1	CG
Bd1	48742338	48742483	146	39	0.814036	0.030069	0.783967	467.867	Bd1-1vsBd3-1	CG
Bd1	14665178	14665446	269	45	0.861742	0.0598975	0.801845	466.816	Bd1-1vsBd3-1	CG
Bd1	10162976	10163172	197	40	0.882748	0.0525484	0.8302	466.22	Bd1-1vsBd3-1	CG
Bd1	46641318	46641569	252	29	0.0472808	0.945537	-0.898256	-465.688	Bd1-1vsBd3-1	CG
Bd1	29841730	29841976	247	38	0.0760725	0.940135	-0.864062	-465.049	Bd1-1vsBd3-1	CG
Bd1	64136665	64137368	704	50	0.102118	0.928861	-0.826744	-464.997	Bd1-1vsBd3-1	CG
Bd1	6054731	6055032	302	35	0.925188	0.047674	0.877514	464.239	Bd1-1vsBd3-1	CG
Bd1	8287991	8288251	261	28	0.913024	0.028234	0.88479	462.821	Bd1-1vsBd3-1	CG
Bd1	42296619	42297340	722	51	0.917504	0.0841181	0.833386	460.709	Bd1-1vsBd3-1	CG
Bd1	60976488	60977090	603	43	0.945425	0.0705117	0.874913	460.205	Bd1-1vsBd3-1	CG
Bd1	28210290	28210554	265	32	0.924328	0.0476826	0.876645	459.082	Bd1-1vsBd3-1	CG
Bd1	53131510	53131774	265	52	0.0311725	0.774315	-0.743143	-457.911	Bd1-1vsBd3-1	CG
Bd1	34661776	34662473	698	36	0.932226	0.112285	0.819942	457.377	Bd1-1vsBd3-1	CG
Bd1	24884032	24884297	266	41	0.0561338	0.842227	-0.786094	-456.496	Bd1-1vsBd3-1	CG
Bd1	4351607	4352087	481	50	0.876125	0.0954786	0.780646	455.151	Bd1-1vsBd3-1	CG
Bd1	48217526	48217823	298	36	0.0554666	0.915427	-0.859961	-454.38	Bd1-1vsBd3-1	CG
Bd1	50564982	50565339	358	41	0.934324	0.0481173	0.886207	453.515	Bd1-1vsBd3-1	CG
Bd1	51207805	51208219	415	44	0.0540005	0.881887	-0.827887	-453.437	Bd1-1vsBd3-1	CG
Bd1	68772188	68772491	304	53	0.944082	0.130287	0.813795	452.906	Bd1-1vsBd3-1	CG
Bd1	741425	741903	479	38	0.108902	0.951193	-0.842291	-452.156	Bd1-1vsBd3-1	CG
Bd1	4500685	4501124	440	42	0.140373	0.942946	-0.802573	-452.154	Bd1-1vsBd3-1	CG
Bd1	56854547	56854792	246	41	0.0603276	0.936546	-0.876218	-452.137	Bd1-1vsBd3-1	CG
Bd1	43386121	43386610	490	50	0.0615105	0.876804	-0.815293	-452.081	Bd1-1vsBd3-1	CG
Bd1	12977199	12977368	170	28	0.955157	0.0669746	0.888182	451.118	Bd1-1vsBd3-1	CG
Bd1	59649610	59649897	288	47	0.0731803	0.893434	-0.820254	-450.894	Bd1-1vsBd3-1	CG
Bd1	28598804	28599005	202	41	0.953952	0.0863135	0.867639	449.541	Bd1-1vsBd3-1	CG
Bd1	54237509	54238075	567	64	0.14723	0.941017	-0.793787	-447.927	Bd1-1vsBd3-1	CG
Bd1	2471622	2472450	829	37	0.91714	0.0484028	0.868737	447.754	Bd1-1vsBd3-1	CG
Bd1	56575953	56576556	604	71	0.177433	0.763621	-0.586187	-446.425	Bd1-1vsBd3-1	CG
Bd1	5526371	5526630	260	42	0.910557	0.0487501	0.861807	446.411	Bd1-1vsBd3-1	CG
Bd1	34170812	34171098	287	24	0.071225	0.962753	-0.891528	-444.633	Bd1-1vsBd3-1	CG
Bd1	11327984	11328628	645	52	0.0907192	0.931305	-0.840586	-444.517	Bd1-1vsBd3-1	CG
Bd1	7057448	7057789	342	45	0.906448	0.109755	0.796693	444.483	Bd1-1vsBd3-1	CG
Bd1	15999804	16000199	396	46	0.906675	0.0881967	0.818478	443.947	Bd1-1vsBd3-1	CG
Bd1	50717629	50717913	285	47	0.948153	0.0955163	0.852637	443.63	Bd1-1vsBd3-1	CG
Bd1	39772982	39773325	344	44	0.945871	0.205437	0.740434	443.251	Bd1-1vsBd3-1	CG
Bd1	33362493	33362875	383	46	0.115981	0.923117	-0.807136	-442.161	Bd1-1vsBd3-1	CG
Bd1	48875347	48875537	191	44	0.844043	0.0541717	0.789871	441.78	Bd1-1vsBd3-1	CG
Bd1	54203483	54203919	437	46	0.0888146	0.911891	-0.823076	-441.406	Bd1-1vsBd3-1	CG
Bd1	65488466	65488934	469	41	0.900521	0.120262	0.780259	440.882	Bd1-1vsBd3-1	CG
Bd1	8796224	8796485	262	30	0.862385	0.064488	0.797897	439.045	Bd1-1vsBd3-1	CG
Bd1	45305660	45306021	362	32	0.0932858	0.954934	-0.861648	-438.213	Bd1-1vsBd3-1	CG
Bd1	67321360	67321727	368	44	0.147705	0.887555	-0.73985	-438.165	Bd1-1vsBd3-1	CG
Bd1	62447329	62447724	396	32	0.950961	0.106714	0.844248	437.592	Bd1-1vsBd3-1	CG
Bd1	24243634	24243766	133	25	0.893969	0.0766842	0.817285	437.236	Bd1-1vsBd3-1	CG
Bd1	23359894	23360262	369	48	0.0406807	0.865998	-0.825317	-435.749	Bd1-1vsBd3-1	CG
Bd1	48756875	48757385	511	39	0.0638544	0.945927	-0.882072	-435.565	Bd1-1vsBd3-1	CG
Bd1	24243253	24243570	318	37	0.883718	0.0630712	0.820647	432.9	Bd1-1vsBd3-1	CG
Bd1	70732521	70733031	511	39	0.130325	0.963643	-0.833318	-432.136	Bd1-1vsBd3-1	CG
Bd1	17290818	17290973	156	34	0.967792	0.236025	0.731767	432.033	Bd1-1vsBd3-1	CG
Bd1	70741879	70742442	564	49	0.127608	0.956046	-0.828438	-431.693	Bd1-1vsBd3-1	CG
Bd1	14676793	14677284	492	27	0.928699	0.0436978	0.885001	431.604	Bd1-1vsBd3-1	CG
Bd1	26808858	26809295	438	32	0.038931	0.919877	-0.880946	-431.486	Bd1-1vsBd3-1	CG
Bd1	34291902	34292375	474	51	0.867434	0.0885251	0.778909	431.108	Bd1-1vsBd3-1	CG
Bd1	68553568	68553894	327	33	0.915299	0.0636929	0.851606	430.867	Bd1-1vsBd3-1	CG
Bd1	66763112	66763432	321	30	0.0810358	0.89703	-0.815994	-430.115	Bd1-1vsBd3-1	CG
Bd1	25708348	25708738	391	40	0.0677231	0.922746	-0.855023	-429.909	Bd1-1vsBd3-1	CG
Bd1	7511137	7511337	201	33	0.0993308	0.958031	-0.8587	-429.323	Bd1-1vsBd3-1	CG
Bd1	30923505	30923825	321	44	0.0634255	0.910395	-0.846969	-429.022	Bd1-1vsBd3-1	CG
Bd1	44869102	44869566	465	42	0.926046	0.0874585	0.838587	427.63	Bd1-1vsBd3-1	CG
Bd1	48129418	48129697	280	41	0.928766	0.0687651	0.860001	426.368	Bd1-1vsBd3-1	CG
Bd1	51811395	51811774	380	31	0.0684774	0.911215	-0.842737	-426.312	Bd1-1vsBd3-1	CG
Bd1	31640022	31640381	360	41	0.925079	0.107807	0.817271	426.098	Bd1-1vsBd3-1	CG
Bd1	24292244	24292591	348	30	0.957395	0.0659989	0.891396	425.401	Bd1-1vsBd3-1	CG
Bd1	25375298	25375653	356	44	0.801831	0.0386033	0.763228	423.664	Bd1-1vsBd3-1	CG
Bd1	27539766	27540037	272	32	0.0531309	0.919257	-0.866126	-423.234	Bd1-1vsBd3-1	CG
Bd1	30140919	30141314	396	43	0.724954	0.05792	0.667034	423.21	Bd1-1vsBd3-1	CG
Bd1	45578579	45579000	422	34	0.936815	0.0627068	0.874108	422.324	Bd1-1vsBd3-1	CG
Bd1	16528611	16529025	415	39	0.0920491	0.888898	-0.796849	-422.231	Bd1-1vsBd3-1	CG
Bd1	42717796	42718292	497	32	0.941849	0.0601025	0.881746	421.732	Bd1-1vsBd3-1	CG
Bd1	11782916	11783115	200	35	0.0500102	0.942198	-0.892188	-420.661	Bd1-1vsBd3-1	CG
Bd1	43160351	43160769	419	53	0.920612	0.0743903	0.846222	420.567	Bd1-1vsBd3-1	CG
Bd1	16068722	16069021	300	33	0.957329	0.0748961	0.882433	419.435	Bd1-1vsBd3-1	CG
Bd1	4165873	4166127	255	51	0.0843636	0.912272	-0.827908	-418.793	Bd1-1vsBd3-1	CG
Bd1	53352107	53352371	265	43	0.894879	0.0648913	0.829988	416.432	Bd1-1vsBd3-1	CG
Bd1	27332755	27332961	207	38	0.839536	0.0362916	0.803244	415.705	Bd1-1vsBd3-1	CG
Bd1	50503963	50504193	231	46	0.942704	0.106504	0.8362	415.686	Bd1-1vsBd3-1	CG
Bd1	59738921	59739314	394	45	0.857644	0.0677722	0.789871	415.435	Bd1-1vsBd3-1	CG
Bd1	13554721	13555069	349	41	0.7929	0.0492188	0.743682	414.851	Bd1-1vsBd3-1	CG
Bd1	57500037	57500338	302	35	0.954619	0.0854575	0.869161	414.219	Bd1-1vsBd3-1	CG
Bd1	53377049	53377327	279	35	0.907899	0.100615	0.807284	413.934	Bd1-1vsBd3-1	CG
Bd1	74750974	74751342	369	37	0.940499	0.119985	0.820514	413.036	Bd1-1vsBd3-1	CG
Bd1	13213798	13214465	668	63	0.901481	0.119762	0.781719	412.88	Bd1-1vsBd3-1	CG
Bd1	34656988	34657352	365	30	0.0952592	0.912673	-0.817414	-411.789	Bd1-1vsBd3-1	CG
Bd1	74251417	74251733	317	46	0.832882	0.0625624	0.77032	411.67	Bd1-1vsBd3-1	CG
Bd1	24323781	24324096	316	40	0.89287	0.0732051	0.819665	411.198	Bd1-1vsBd3-1	CG
Bd1	49265004	49265416	413	74	0.32076	0.85119	-0.53043	-410.114	Bd1-1vsBd3-1	CG
Bd1	7083796	7084271	476	30	0.0678008	0.942647	-0.874846	-409.243	Bd1-1vsBd3-1	CG
Bd1	5169244	5169680	437	58	0.827922	0.116949	0.710973	408.256	Bd1-1vsBd3-1	CG
Bd1	57894076	57894329	254	39	0.794388	0.101814	0.692574	406.909	Bd1-1vsBd3-1	CG
Bd1	22355115	22355268	154	26	0.0562783	0.950613	-0.894334	-406.612	Bd1-1vsBd3-1	CG
Bd1	15876189	15876698	510	77	0.901897	0.263558	0.638339	404.565	Bd1-1vsBd3-1	CG
Bd1	51530363	51530773	411	35	0.0725198	0.945316	-0.872796	-404.496	Bd1-1vsBd3-1	CG
Bd1	15442683	15443163	481	54	0.912047	0.179142	0.732905	404.435	Bd1-1vsBd3-1	CG
Bd1	72056235	72056618	384	66	0.649338	0.0842546	0.565083	404.108	Bd1-1vsBd3-1	CG
Bd1	41485740	41486522	783	62	0.782713	0.0537071	0.729006	402.559	Bd1-1vsBd3-1	CG
Bd1	2330662	2331169	508	45	0.932796	0.107301	0.825495	402.385	Bd1-1vsBd3-1	CG
Bd1	56274167	56274579	413	48	0.811173	0.0844898	0.726683	402.019	Bd1-1vsBd3-1	CG
Bd1	27372376	27373339	964	53	0.109794	0.936698	-0.826903	-401.98	Bd1-1vsBd3-1	CG
Bd1	4826346	4826917	572	44	0.175058	0.913952	-0.738894	-401.971	Bd1-1vsBd3-1	CG
Bd1	53568210	53568385	176	30	0.0713511	0.87922	-0.807869	-400.636	Bd1-1vsBd3-1	CG
Bd1	13171446	13171837	392	28	0.229435	0.950405	-0.720969	-399.949	Bd1-1vsBd3-1	CG
Bd1	42524654	42525171	518	28	0.061637	0.949644	-0.888007	-399.831	Bd1-1vsBd3-1	CG
Bd1	18956756	18957159	404	40	0.936319	0.0798614	0.856458	399.694	Bd1-1vsBd3-1	CG
Bd1	71234399	71234980	582	33	0.0516942	0.896793	-0.845099	-399.294	Bd1-1vsBd3-1	CG
Bd1	4773973	4774396	424	42	0.895678	0.0697336	0.825945	399.143	Bd1-1vsBd3-1	CG
Bd1	25079467	25079815	349	37	0.0504685	0.921104	-0.870635	-399.129	Bd1-1vsBd3-1	CG
Bd1	40736537	40736840	304	52	0.250046	0.940238	-0.690192	-398.716	Bd1-1vsBd3-1	CG
Bd1	1988886	1989048	163	27	0.0638712	0.943966	-0.880095	-398.182	Bd1-1vsBd3-1	CG
Bd1	4720660	4721207	548	41	0.945706	0.0937239	0.851982	398.036	Bd1-1vsBd3-1	CG
Bd1	58083407	58083700	294	51	0.676863	0.0472461	0.629617	397.928	Bd1-1vsBd3-1	CG
Bd1	11835305	11835724	420	48	0.779921	0.0837913	0.69613	397.34	Bd1-1vsBd3-1	CG
Bd1	7078775	7079117	343	29	0.0518986	0.954874	-0.902976	-397.228	Bd1-1vsBd3-1	CG
Bd1	29755279	29755668	390	42	0.0994325	0.873219	-0.773787	-396.569	Bd1-1vsBd3-1	CG
Bd1	47680098	47680442	345	25	0.948099	0.0483218	0.899777	396.007	Bd1-1vsBd3-1	CG
Bd1	64132550	64133059	510	43	0.101713	0.938252	-0.836539	-395.795	Bd1-1vsBd3-1	CG
Bd1	57162925	57163040	116	26	0.968875	0.0770057	0.891869	394.689	Bd1-1vsBd3-1	CG
Bd1	5760485	5760804	320	51	0.903929	0.0499834	0.853946	394.687	Bd1-1vsBd3-1	CG
Bd1	53947033	53947312	280	43	0.953772	0.0876626	0.866109	394.123	Bd1-1vsBd3-1	CG
Bd1	43303052	43303293	242	27	0.925607	0.0920542	0.833552	393.887	Bd1-1vsBd3-1	CG
Bd1	1205419	1205947	529	63	0.858471	0.259654	0.598816	393.626	Bd1-1vsBd3-1	CG
Bd1	45179557	45179921	365	44	0.116143	0.938688	-0.822544	-393.508	Bd1-1vsBd3-1	CG
Bd1	55145904	55146170	267	23	0.951056	0.0770594	0.873996	393.489	Bd1-1vsBd3-1	CG
Bd1	66307974	66308214	241	46	0.940252	0.202367	0.737885	393.185	Bd1-1vsBd3-1	CG
Bd1	73105391	73105813	423	45	0.120452	0.846496	-0.726044	-392.722	Bd1-1vsBd3-1	CG
Bd1	29039131	29039351	221	33	0.0682013	0.8586	-0.790399	-392.654	Bd1-1vsBd3-1	CG
Bd1	40466289	40466481	193	32	0.908381	0.0548147	0.853566	392.581	Bd1-1vsBd3-1	CG
Bd1	60784481	60784937	457	51	0.901216	0.101262	0.799954	391.468	Bd1-1vsBd3-1	CG
Bd1	9669109	9669313	205	32	0.940544	0.0928035	0.84774	390.877	Bd1-1vsBd3-1	CG
Bd1	22902302	22902695	394	34	0.939687	0.0960072	0.84368	390.098	Bd1-1vsBd3-1	CG
Bd1	57943002	57943662	661	39	0.0522884	0.923644	-0.871355	-389.375	Bd1-1vsBd3-1	CG
Bd1	53847446	53847942	497	54	0.0693366	0.896068	-0.826731	-388.857	Bd1-1vsBd3-1	CG
Bd1	54501810	54502041	232	32	0.871851	0.0849344	0.786917	388.816	Bd1-1vsBd3-1	CG
Bd1	73106100	73106665	566	30	0.10109	0.963337	-0.862247	-388.186	Bd1-1vsBd3-1	CG
Bd1	69170630	69170766	137	21	0.0465565	0.959241	-0.912685	-387.644	Bd1-1vsBd3-1	CG
Bd1	69670108	69670446	339	29	0.938574	0.241172	0.697402	387.337	Bd1-1vsBd3-1	CG
Bd1	52318627	52318869	243	41	0.908053	0.098238	0.809815	386.643	Bd1-1vsBd3-1	CG
Bd1	59796423	59796575	153	37	0.772398	0.0801581	0.69224	386.497	Bd1-1vsBd3-1	CG
Bd1	67945479	67945932	454	28	0.0725885	0.955926	-0.883337	-385.569	Bd1-1vsBd3-1	CG
Bd1	24749952	24750395	444	38	0.923131	0.0789535	0.844178	384.741	Bd1-1vsBd3-1	CG
Bd1	20259111	20259470	360	33	0.897529	0.0572537	0.840275	384.223	Bd1-1vsBd3-1	CG
Bd1	848794	849158	365	60	0.0822187	0.834189	-0.751971	-383.92	Bd1-1vsBd3-1	CG
Bd1	68460797	68461040	244	32	0.937778	0.157613	0.780164	383.913	Bd1-1vsBd3-1	CG
Bd1	66764650	66765503	854	35	0.929038	0.0801258	0.848912	382.276	Bd1-1vsBd3-1	CG
Bd1	27261444	27262429	986	36	0.0569617	0.879498	-0.822536	-381.391	Bd1-1vsBd3-1	CG
Bd1	14311250	14311539	290	35	0.893202	0.0608186	0.832384	381.252	Bd1-1vsBd3-1	CG
Bd1	71118038	71118508	471	30	0.951213	0.0599784	0.891235	381.089	Bd1-1vsBd3-1	CG
Bd1	45173641	45174070	430	48	0.134374	0.89147	-0.757096	-380.444	Bd1-1vsBd3-1	CG
Bd1	69117178	69118093	916	39	0.164398	0.946114	-0.781716	-380.215	Bd1-1vsBd3-1	CG
Bd1	16158166	16158655	490	47	0.946533	0.168271	0.778262	379.379	Bd1-1vsBd3-1	CG
Bd1	29270873	29271098	226	33	0.870379	0.0804594	0.78992	379.213	Bd1-1vsBd3-1	CG
Bd1	42208904	42209541	638	32	0.0740125	0.931291	-0.857278	-378.424	Bd1-1vsBd3-1	CG
Bd1	37473580	37473826	247	25	0.0529477	0.923036	-0.870088	-376.895	Bd1-1vsBd3-1	CG
Bd1	25969194	25969632	439	30	0.973672	0.0844702	0.889202	376.559	Bd1-1vsBd3-1	CG
Bd1	65992278	65992571	294	47	0.806262	0.162549	0.643713	376.294	Bd1-1vsBd3-1	CG
Bd1	12233125	12233275	151	28	0.936096	0.0580887	0.878007	376.215	Bd1-1vsBd3-1	CG
Bd1	9330147	9330491	345	25	0.0656194	0.952442	-0.886823	-376.114	Bd1-1vsBd3-1	CG
Bd1	60852851	60853151	301	23	0.0490397	0.937066	-0.888027	-376.089	Bd1-1vsBd3-1	CG
Bd1	5446667	5447008	342	42	0.899863	0.0792972	0.820566	376.039	Bd1-1vsBd3-1	CG
Bd1	43065362	43065886	525	37	0.0946723	0.926972	-0.832299	-375.808	Bd1-1vsBd3-1	CG
Bd1	48760595	48761318	724	54	0.15265	0.9283	-0.77565	-375.736	Bd1-1vsBd3-1	CG
Bd1	4470042	4470278	237	44	0.689182	0.0480986	0.641083	374.499	Bd1-1vsBd3-1	CG
Bd1	33077204	33077460	257	28	0.924425	0.0731072	0.851318	374.281	Bd1-1vsBd3-1	CG
Bd1	66214721	66215189	469	50	0.0906305	0.907747	-0.817116	-373.153	Bd1-1vsBd3-1	CG
Bd1	22644686	22644948	263	33	0.944317	0.0586403	0.885677	372.555	Bd1-1vsBd3-1	CG
Bd1	53853584	53853873	290	44	0.158382	0.933405	-0.775023	-372.548	Bd1-1vsBd3-1	CG
Bd1	4320303	4320543	241	46	0.053674	0.832684	-0.77901	-372.118	Bd1-1vsBd3-1	CG
Bd1	68785285	68785676	392	35	0.940437	0.122981	0.817456	371.826	Bd1-1vsBd3-1	CG
Bd1	22575967	22576084	118	28	0.048192	0.910214	-0.862022	-371.471	Bd1-1vsBd3-1	CG
Bd1	21172470	21172942	473	41	0.048932	0.880953	-0.832021	-371.415	Bd1-1vsBd3-1	CG
Bd1	73855413	73855580	168	25	0.818959	0.0683088	0.75065	370.483	Bd1-1vsBd3-1	CG
Bd1	55149811	55149981	171	42	0.0805125	0.881568	-0.801056	-369.961	Bd1-1vsBd3-1	CG
Bd1	22185426	22185733	308	40	0.907201	0.185329	0.721872	369.324	Bd1-1vsBd3-1	CG
Bd1	8986466	8987435	970	36	0.924354	0.0942289	0.830125	368.94	Bd1-1vsBd3-1	CG
Bd1	31375160	31375655	496	55	0.240418	0.866034	-0.625616	-368.865	Bd1-1vsBd3-1	CG
Bd1	56101634	56102110	477	27	0.0348097	0.901263	-0.866453	-368.326	Bd1-1vsBd3-1	CG
Bd1	56493489	56493879	391	64	0.0267024	0.597345	-0.570642	-367.663	Bd1-1vsBd3-1	CG
Bd1	24513927	24514233	307	27	0.0465509	0.940828	-0.894277	-366.921	Bd1-1vsBd3-1	CG
Bd1	34765012	34765365	354	30	0.0585354	0.941025	-0.88249	-365.847	Bd1-1vsBd3-1	CG
Bd1	64612528	64612728	201	31	0.0482291	0.888483	-0.840254	-365.14	Bd1-1vsBd3-1	CG
Bd1	51817151	51817435	285	49	0.89426	0.148431	0.74583	364.91	Bd1-1vsBd3-1	CG
Bd1	67460548	67461242	695	34	0.902523	0.0505395	0.851983	364.441	Bd1-1vsBd3-1	CG
Bd1	47944014	47944436	423	37	0.859362	0.108655	0.750707	364.029	Bd1-1vsBd3-1	CG
Bd1	5096759	5097195	437	44	0.0786572	0.84227	-0.763613	-364.021	Bd1-1vsBd3-1	CG
Bd1	61129801	61130338	538	43	0.853016	0.0686599	0.784357	363.036	Bd1-1vsBd3-1	CG
Bd1	37665134	37665368	235	43	0.0767619	0.905588	-0.828826	-363.033	Bd1-1vsBd3-1	CG
Bd1	54377766	54378132	367	46	0.217238	0.96102	-0.743782	-362.814	Bd1-1vsBd3-1	CG
Bd1	7677170	7677536	367	62	0.144814	0.918641	-0.773827	-362.406	Bd1-1vsBd3-1	CG
Bd1	38058360	38059020	661	34	0.940804	0.0983541	0.84245	361.284	Bd1-1vsBd3-1	CG
Bd1	23364925	23365236	312	32	0.929992	0.115568	0.814424	360.463	Bd1-1vsBd3-1	CG
Bd1	48944199	48944334	136	20	0.942178	0.0303603	0.911818	360.435	Bd1-1vsBd3-1	CG
Bd1	26281377	26281664	288	30	0.055029	0.913791	-0.858762	-360.065	Bd1-1vsBd3-1	CG
Bd1	50166620	50166907	288	36	0.0597072	0.923109	-0.863402	-360.058	Bd1-1vsBd3-1	CG
Bd1	25102912	25103060	149	31	0.924461	0.0286759	0.895785	359.977	Bd1-1vsBd3-1	CG
Bd1	48759139	48760160	1022	50	0.0830286	0.876559	-0.793531	-359.737	Bd1-1vsBd3-1	CG
Bd1	50171532	50171848	317	37	0.0653028	0.866249	-0.800946	-359.687	Bd1-1vsBd3-1	CG
Bd1	47790774	47790947	174	46	0.715971	0.0368718	0.679099	359.26	Bd1-1vsBd3-1	CG
Bd1	69126970	69127595	626	48	0.916237	0.104623	0.811614	358.785	Bd1-1vsBd3-1	CG
Bd1	4069612	4069939	328	30	0.852234	0.0435426	0.808692	358.69	Bd1-1vsBd3-1	CG
Bd1	7493644	7493810	167	22	0.0368514	0.962564	-0.925712	-358.619	Bd1-1vsBd3-1	CG
Bd1	28694055	28694453	399	29	0.929904	0.0482003	0.881703	358.515	Bd1-1vsBd3-1	CG
Bd1	2896825	2897175	351	33	0.0597663	0.899847	-0.840081	-358.304	Bd1-1vsBd3-1	CG
Bd1	61326314	61326582	269	37	0.951729	0.107762	0.843967	358.019	Bd1-1vsBd3-1	CG
Bd1	54318315	54318976	662	39	0.880149	0.117286	0.762863	357.004	Bd1-1vsBd3-1	CG
Bd1	2142091	2142349	259	45	0.127729	0.955178	-0.82745	-355.821	Bd1-1vsBd3-1	CG
Bd1	8300950	8301377	428	41	0.185539	0.945399	-0.75986	-355.65	Bd1-1vsBd3-1	CG
Bd1	13763998	13764819	822	42	0.0809993	0.911405	-0.830405	-354.845	Bd1-1vsBd3-1	CG
Bd1	15805986	15806242	257	46	0.841041	0.258305	0.582736	353.288	Bd1-1vsBd3-1	CG
Bd1	34362037	34362331	295	17	0.955472	0.040927	0.914545	353.053	Bd1-1vsBd3-1	CG
Bd1	21798892	21799184	293	25	0.094194	0.955151	-0.860957	-352.593	Bd1-1vsBd3-1	CG
Bd1	48765297	48765768	472	37	0.0468943	0.86328	-0.816386	-352.585	Bd1-1vsBd3-1	CG
Bd1	1886209	1886474	266	40	0.717834	0.173942	0.543892	351.882	Bd1-1vsBd3-1	CG
Bd1	29244202	29244707	506	47	0.110965	0.80347	-0.692506	-351.533	Bd1-1vsBd3-1	CG
Bd1	56076292	56076468	177	24	0.116779	0.962243	-0.845465	-351.374	Bd1-1vsBd3-1	CG
Bd1	11363132	11363890	759	26	0.92876	0.0944592	0.834301	350.999	Bd1-1vsBd3-1	CG
Bd1	49453904	49454154	251	61	0.0452562	0.645997	-0.60074	-350.671	Bd1-1vsBd3-1	CG
Bd1	48160146	48160496	351	29	0.9326	0.0717947	0.860805	349.776	Bd1-1vsBd3-1	CG
Bd1	53594790	53595007	218	29	0.948302	0.100588	0.847713	349.134	Bd1-1vsBd3-1	CG
Bd1	69870017	69870185	169	41	0.0806705	0.926741	-0.846071	-348.822	Bd1-1vsBd3-1	CG
Bd1	42811773	42811915	143	38	0.0514003	0.867939	-0.816539	-348.803	Bd1-1vsBd3-1	CG
Bd1	24212358	24212913	556	39	0.80431	0.0919764	0.712334	348.414	Bd1-1vsBd3-1	CG
Bd1	43096809	43097067	259	28	0.882305	0.0921498	0.790155	348.159	Bd1-1vsBd3-1	CG
Bd1	70289418	70289722	305	33	0.14255	0.956508	-0.813958	-347.505	Bd1-1vsBd3-1	CG
Bd1	58163952	58164256	305	36	0.118182	0.940234	-0.822052	-347.375	Bd1-1vsBd3-1	CG
Bd1	1298899	1299181	283	66	0.0347342	0.632246	-0.597512	-347.22	Bd1-1vsBd3-1	CG
Bd1	52105047	52105331	285	32	0.241247	0.960492	-0.719245	-346.877	Bd1-1vsBd3-1	CG
Bd1	18050055	18050304	250	35	0.0683348	0.832094	-0.763759	-346.77	Bd1-1vsBd3-1	CG
Bd1	9670566	9671120	555	29	0.0623089	0.918954	-0.856645	-346.248	Bd1-1vsBd3-1	CG
Bd1	7080912	7081168	257	34	0.0732776	0.958353	-0.885075	-346.219	Bd1-1vsBd3-1	CG
Bd1	15399653	15399932	280	54	0.197543	0.728773	-0.53123	-345.417	Bd1-1vsBd3-1	CG
Bd1	71685371	71685810	440	41	0.064147	0.871323	-0.807176	-345.358	Bd1-1vsBd3-1	CG
Bd1	26120738	26120941	204	16	0.0486414	0.963115	-0.914473	-345.167	Bd1-1vsBd3-1	CG
Bd1	71346608	71347094	487	38	0.0932391	0.942405	-0.849166	-344.334	Bd1-1vsBd3-1	CG
Bd1	3023966	3024307	342	38	0.887724	0.0779954	0.809728	343.966	Bd1-1vsBd3-1	CG
Bd1	30330818	30331423	606	44	0.948286	0.133374	0.814912	343.04	Bd1-1vsBd3-1	CG
Bd1	958722	959055	334	57	0.359337	0.883332	-0.523995	-342.999	Bd1-1vsBd3-1	CG
Bd1	14282640	14282989	350	19	0.864122	0.090874	0.773248	342.806	Bd1-1vsBd3-1	CG
Bd1	959109	959309	201	36	0.193743	0.904853	-0.711109	-342.612	Bd1-1vsBd3-1	CG
Bd1	68409137	68409878	742	54	0.874632	0.0995364	0.775096	342.548	Bd1-1vsBd3-1	CG
Bd1	20197913	20198231	319	41	0.955049	0.11237	0.842679	341.971	Bd1-1vsBd3-1	CG
Bd1	16087083	16087449	367	45	0.0525154	0.754983	-0.702467	-341.077	Bd1-1vsBd3-1	CG
Bd1	9236399	9236877	479	34	0.911174	0.0982035	0.812971	341.048	Bd1-1vsBd3-1	CG
Bd1	48331857	48332122	266	23	0.945546	0.044568	0.900978	340.969	Bd1-1vsBd3-1	CG
Bd1	52901211	52901563	353	34	0.103821	0.962232	-0.858411	-340.458	Bd1-1vsBd3-1	CG
Bd1	54895865	54896151	287	38	0.967415	0.152367	0.815048	340.32	Bd1-1vsBd3-1	CG
Bd1	57514667	57514859	193	26	0.196621	0.948937	-0.752316	-340.115	Bd1-1vsBd3-1	CG
Bd1	3357977	3358364	388	35	0.955541	0.0797574	0.875784	339.236	Bd1-1vsBd3-1	CG
Bd1	51601504	51601612	109	30	0.944412	0.0658826	0.878529	339.142	Bd1-1vsBd3-1	CG
Bd1	20024472	20024891	420	17	0.92078	0.0445987	0.876181	339.112	Bd1-1vsBd3-1	CG
Bd1	23789375	23789568	194	24	0.912764	0.0511891	0.861575	338.781	Bd1-1vsBd3-1	CG
Bd1	45032944	45033188	245	42	0.102347	0.906173	-0.803826	-338.644	Bd1-1vsBd3-1	CG
Bd1	33718436	33718917	482	37	0.0595944	0.92545	-0.865856	-338.393	Bd1-1vsBd3-1	CG
Bd1	28335433	28335599	167	41	0.0883838	0.905055	-0.816672	-337.152	Bd1-1vsBd3-1	CG
Bd1	71481027	71481270	244	42	0.0473566	0.806611	-0.759255	-337.041	Bd1-1vsBd3-1	CG
Bd1	71137820	71138293	474	35	0.91366	0.0985876	0.815073	336.665	Bd1-1vsBd3-1	CG
Bd1	67558202	67558463	262	24	0.0532799	0.947838	-0.894558	-336.511	Bd1-1vsBd3-1	CG
Bd1	50171899	50172166	268	31	0.037861	0.888032	-0.850171	-335.992	Bd1-1vsBd3-1	CG
Bd1	24589530	24589865	336	43	0.127124	0.902425	-0.775301	-335.62	Bd1-1vsBd3-1	CG
Bd1	68710316	68710667	352	32	0.901553	0.0569567	0.844596	335.522	Bd1-1vsBd3-1	CG
Bd1	1333493	1333581	89	26	0.0221302	0.841227	-0.819096	-334.701	Bd1-1vsBd3-1	CG
Bd1	33837925	33838127	203	30	0.0731651	0.855233	-0.782068	-334.377	Bd1-1vsBd3-1	CG
Bd1	53637729	53637986	258	24	0.937025	0.112401	0.824624	334.195	Bd1-1vsBd3-1	CG
Bd1	20948421	20948625	205	36	0.953624	0.0802784	0.873345	334.076	Bd1-1vsBd3-1	CG
Bd1	34764088	34764611	524	36	0.119234	0.943618	-0.824384	-334.052	Bd1-1vsBd3-1	CG
Bd1	33452060	33452238	179	44	0.261002	0.883889	-0.622888	-333.74	Bd1-1vsBd3-1	CG
Bd1	33718988	33719140	153	25	0.0891793	0.926757	-0.837578	-332.234	Bd1-1vsBd3-1	CG
Bd1	1236660	1236969	310	51	0.914678	0.125344	0.789334	332.09	Bd1-1vsBd3-1	CG
Bd1	48944420	48944882	463	31	0.933124	0.0572863	0.875838	331.19	Bd1-1vsBd3-1	CG
Bd1	47288155	47288470	316	33	0.970959	0.08338	0.887579	330.935	Bd1-1vsBd3-1	CG
Bd1	58448475	58448780	306	42	0.861756	0.0565952	0.805161	330.754	Bd1-1vsBd3-1	CG
Bd1	40277234	40278081	848	56	0.195476	0.731733	-0.536257	-330.597	Bd1-1vsBd3-1	CG
Bd1	42241010	42241209	200	28	0.0503183	0.918111	-0.867793	-330.283	Bd1-1vsBd3-1	CG
Bd1	33144447	33144960	514	43	0.135202	0.966242	-0.831041	-329.483	Bd1-1vsBd3-1	CG
Bd1	16482498	16482656	159	30	0.0330873	0.812831	-0.779744	-329.138	Bd1-1vsBd3-1	CG
Bd1	49355991	49356233	243	68	0.0549894	0.585653	-0.530664	-328.576	Bd1-1vsBd3-1	CG
Bd1	58733946	58734363	418	36	0.0871706	0.902842	-0.815672	-327.356	Bd1-1vsBd3-1	CG
Bd1	26632107	26632290	184	23	0.0556311	0.794266	-0.738635	-326.458	Bd1-1vsBd3-1	CG
Bd1	43380998	43381242	245	33	0.117427	0.938813	-0.821385	-326.105	Bd1-1vsBd3-1	CG
Bd1	14093911	14094237	327	40	0.900597	0.122175	0.778422	325.952	Bd1-1vsBd3-1	CG
Bd1	63953744	63953980	237	33	0.899563	0.0538309	0.845732	325.86	Bd1-1vsBd3-1	CG
Bd1	13738	13844	107	30	0.902471	0.0483187	0.854152	325.816	Bd1-1vsBd3-1	CG
Bd1	51752096	51752979	884	43	0.943581	0.087182	0.856399	325.399	Bd1-1vsBd3-1	CG
Bd1	31827347	31827671	325	46	0.112236	0.941489	-0.829253	-324.918	Bd1-1vsBd3-1	CG
Bd1	10984452	10984627	176	24	0.875937	0.0212005	0.854736	324.43	Bd1-1vsBd3-1	CG
Bd1	34120975	34121415	441	35	0.0752571	0.930967	-0.85571	-324.402	Bd1-1vsBd3-1	CG
Bd1	34014424	34014694	271	29	0.91884	0.223181	0.695659	323.811	Bd1-1vsBd3-1	CG
Bd1	63104964	63105345	382	38	0.886949	0.0922488	0.7947	323.174	Bd1-1vsBd3-1	CG
Bd1	30584677	30585066	390	37	0.893694	0.0834479	0.810246	323.007	Bd1-1vsBd3-1	CG
Bd1	53866598	53866959	362	33	0.0799348	0.923047	-0.843113	-322.806	Bd1-1vsBd3-1	CG
Bd1	53377882	53378173	292	27	0.915376	0.0774047	0.837971	322.625	Bd1-1vsBd3-1	CG
Bd1	12626875	12627237	363	39	0.929037	0.102542	0.826495	321.276	Bd1-1vsBd3-1	CG
Bd1	28688530	28689196	667	47	0.0874485	0.889473	-0.802024	-320.839	Bd1-1vsBd3-1	CG
Bd1	7711771	7712206	436	40	0.0402514	0.805863	-0.765612	-320.833	Bd1-1vsBd3-1	CG
Bd1	16006247	16006613	367	31	0.109679	0.928101	-0.818422	-320.358	Bd1-1vsBd3-1	CG
Bd1	47215700	47215889	190	50	0.218787	0.930815	-0.712028	-319.817	Bd1-1vsBd3-1	CG
Bd1	50328306	50328539	234	31	0.075932	0.929451	-0.853519	-319.208	Bd1-1vsBd3-1	CG
Bd1	43638124	43638454	331	31	0.883495	0.0661391	0.817356	319.14	Bd1-1vsBd3-1	CG
Bd1	26162685	26163013	329	60	0.0423562	0.619969	-0.577612	-319.138	Bd1-1vsBd3-1	CG
Bd1	28672105	28672305	201	41	0.0633931	0.82763	-0.764237	-318.28	Bd1-1vsBd3-1	CG
Bd1	27870286	27870876	591	37	0.897894	0.0942777	0.803616	318.091	Bd1-1vsBd3-1	CG
Bd1	23624572	23624808	237	30	0.0543335	0.941982	-0.887648	-317.606	Bd1-1vsBd3-1	CG
Bd1	8529088	8529466	379	33	0.0935741	0.824264	-0.73069	-317.222	Bd1-1vsBd3-1	CG
Bd1	15827743	15827969	227	27	0.0876344	0.938877	-0.851242	-316.175	Bd1-1vsBd3-1	CG
Bd1	47112181	47112389	209	30	0.941923	0.055521	0.886402	315.978	Bd1-1vsBd3-1	CG
Bd1	42473103	42473357	255	48	0.32386	0.952127	-0.628267	-315.822	Bd1-1vsBd3-1	CG
Bd1	43810741	43810979	239	55	0.139964	0.930848	-0.790885	-315.627	Bd1-1vsBd3-1	CG
Bd1	61731225	61731498	274	30	0.899653	0.0591488	0.840505	315.021	Bd1-1vsBd3-1	CG
Bd1	15448466	15448906	441	33	0.95032	0.20835	0.74197	314.989	Bd1-1vsBd3-1	CG
Bd1	25482969	25483132	164	25	0.0510856	0.946759	-0.895673	-314.491	Bd1-1vsBd3-1	CG
Bd1	4822568	4822844	277	37	0.172392	0.923016	-0.750624	-313.377	Bd1-1vsBd3-1	CG
Bd1	30191493	30192360	868	29	0.89125	0.0623799	0.82887	313.282	Bd1-1vsBd3-1	CG
Bd1	47306521	47307297	777	38	0.931711	0.107858	0.823854	313.271	Bd1-1vsBd3-1	CG
Bd1	74817921	74818222	302	14	0.0695364	0.93071	-0.861173	-312.98	Bd1-1vsBd3-1	CG
Bd1	18310919	18311202	284	25	0.0611313	0.924592	-0.863461	-310.927	Bd1-1vsBd3-1	CG
Bd1	64259453	64259679	227	28	0.941998	0.0737102	0.868288	310.86	Bd1-1vsBd3-1	CG
Bd1	68304317	68304539	223	46	0.060994	0.770639	-0.709645	-310.495	Bd1-1vsBd3-1	CG
Bd1	56567685	56568086	402	50	0.0386479	0.691991	-0.653343	-309.563	Bd1-1vsBd3-1	CG
Bd1	35214615	35214994	380	25	0.951546	0.0563967	0.89515	309.44	Bd1-1vsBd3-1	CG
Bd1	44229599	44229771	173	43	0.724391	0.0584138	0.665977	309.055	Bd1-1vsBd3-1	CG
Bd1	59277112	59277591	480	36	0.917854	0.129584	0.78827	308.911	Bd1-1vsBd3-1	CG
Bd1	65034148	65034403	256	28	0.945881	0.0637857	0.882095	308.707	Bd1-1vsBd3-1	CG
Bd1	62543221	62543405	185	30	0.0773928	0.916619	-0.839227	-307.845	Bd1-1vsBd3-1	CG
Bd1	38786348	38786747	400	33	0.84547	0.106716	0.738755	307.737	Bd1-1vsBd3-1	CG
Bd1	7085584	7085792	209	29	0.203883	0.905495	-0.701612	-307.651	Bd1-1vsBd3-1	CG
Bd1	42819873	42820195	323	18	0.039723	0.937676	-0.897952	-306.898	Bd1-1vsBd3-1	CG
Bd1	47643693	47644047	355	38	0.0555138	0.809751	-0.754237	-306.545	Bd1-1vsBd3-1	CG
Bd1	56331174	56331318	145	42	0.257793	0.969871	-0.712078	-306.525	Bd1-1vsBd3-1	CG
Bd1	22459861	22459951	91	23	0.0850274	0.922176	-0.837149	-305.771	Bd1-1vsBd3-1	CG
Bd1	47944881	47945178	298	17	0.965543	0.0499006	0.915642	305.227	Bd1-1vsBd3-1	CG
Bd1	66088086	66088179	94	17	0.0293034	0.952951	-0.923647	-304.803	Bd1-1vsBd3-1	CG
Bd1	7738355	7738894	540	37	0.883101	0.0840412	0.799059	304.007	Bd1-1vsBd3-1	CG
Bd1	54299623	54299940	318	49	0.8058	0.23885	0.56695	303.997	Bd1-1vsBd3-1	CG
Bd1	40275160	40275375	216	24	0.0289963	0.895928	-0.866931	-303.988	Bd1-1vsBd3-1	CG
Bd1	13165500	13165737	238	25	0.137702	0.917816	-0.780114	-303.49	Bd1-1vsBd3-1	CG
Bd1	61998577	61998856	280	31	0.940179	0.080944	0.859235	303.289	Bd1-1vsBd3-1	CG
Bd1	18347781	18348054	274	33	0.882281	0.100455	0.781826	303.146	Bd1-1vsBd3-1	CG
Bd1	68873125	68873434	310	28	0.859422	0.039292	0.82013	301.166	Bd1-1vsBd3-1	CG
Bd1	47647046	47647263	218	27	0.149413	0.903542	-0.754129	-301.115	Bd1-1vsBd3-1	CG
Bd1	19449067	19449269	203	20	0.139681	0.919364	-0.779683	-301.082	Bd1-1vsBd3-1	CG
Bd1	28337377	28337776	400	33	0.854125	0.0649797	0.789146	300.514	Bd1-1vsBd3-1	CG
Bd1	45224639	45224988	350	32	0.95997	0.0916348	0.868335	300.305	Bd1-1vsBd3-1	CG
Bd1	8781497	8781821	325	30	0.868616	0.0776188	0.790997	300.294	Bd1-1vsBd3-1	CG
Bd1	5775028	5775320	293	24	0.939761	0.0624031	0.877358	299.656	Bd1-1vsBd3-1	CG
Bd1	24015907	24015993	87	17	0.0494264	0.944323	-0.894897	-299.583	Bd1-1vsBd3-1	CG
Bd1	21442363	21442832	470	54	0.924387	0.373783	0.550604	299.477	Bd1-1vsBd3-1	CG
Bd1	4591072	4591305	234	21	0.0448883	0.915813	-0.870924	-299.408	Bd1-1vsBd3-1	CG
Bd1	59619132	59619383	252	33	0.0649491	0.858629	-0.793679	-299.063	Bd1-1vsBd3-1	CG
Bd1	14771697	14772041	345	81	0.0408815	0.510222	-0.469341	-298.944	Bd1-1vsBd3-1	CG
Bd1	4824839	4825182	344	46	0.902704	0.128723	0.773981	298.805	Bd1-1vsBd3-1	CG
Bd1	64050839	64051390	552	36	0.0582565	0.841682	-0.783426	-298.277	Bd1-1vsBd3-1	CG
Bd1	27499957	27500340	384	28	0.0558307	0.871636	-0.815806	-298.062	Bd1-1vsBd3-1	CG
Bd1	70246786	70247075	290	28	0.941407	0.0765614	0.864845	298.049	Bd1-1vsBd3-1	CG
Bd1	32210893	32211161	269	47	0.96904	0.306047	0.662992	297.4	Bd1-1vsBd3-1	CG
Bd1	58168250	58168383	134	17	0.935006	0.0490362	0.88597	297.307	Bd1-1vsBd3-1	CG
Bd1	53236986	53237250	265	38	0.801147	0.059618	0.741529	297.124	Bd1-1vsBd3-1	CG
Bd1	40279552	40279925	374	32	0.884437	0.0860876	0.79835	297.011	Bd1-1vsBd3-1	CG
Bd1	7328728	7328959	232	30	0.873078	0.0805639	0.792514	296.937	Bd1-1vsBd3-1	CG
Bd1	2731360	2731551	192	15	0.922595	0.0278452	0.894749	296.913	Bd1-1vsBd3-1	CG
Bd1	26288804	26289052	249	32	0.0536018	0.801551	-0.747949	-296.698	Bd1-1vsBd3-1	CG
Bd1	58176837	58177153	317	34	0.89564	0.145701	0.749939	296.439	Bd1-1vsBd3-1	CG
Bd1	1041488	1041646	159	36	0.0857463	0.867123	-0.781376	-295.774	Bd1-1vsBd3-1	CG
Bd1	25359431	25359726	296	25	0.0406299	0.884137	-0.843507	-295.673	Bd1-1vsBd3-1	CG
Bd1	49968799	49969081	283	33	0.927957	0.0820196	0.845938	295.47	Bd1-1vsBd3-1	CG
Bd1	43066964	43067366	403	32	0.064116	0.930807	-0.866691	-294.681	Bd1-1vsBd3-1	CG
Bd1	70422344	70422570	227	40	0.903097	0.202947	0.700151	294.405	Bd1-1vsBd3-1	CG
Bd1	46398148	46398499	352	33	0.857818	0.0792641	0.778554	294.233	Bd1-1vsBd3-1	CG
Bd1	70714491	70714847	357	27	0.0664405	0.902688	-0.836248	-294.045	Bd1-1vsBd3-1	CG
Bd1	20394116	20394300	185	18	0.943381	0.116145	0.827236	293.887	Bd1-1vsBd3-1	CG
Bd1	49017665	49017843	179	24	0.0712991	0.832845	-0.761546	-293.427	Bd1-1vsBd3-1	CG
Bd1	53918748	53919028	281	29	0.103234	0.944568	-0.841334	-293.154	Bd1-1vsBd3-1	CG
Bd1	12124133	12124398	266	30	0.914087	0.0531206	0.860967	292.759	Bd1-1vsBd3-1	CG
Bd1	62966115	62966388	274	25	0.9356	0.0532507	0.88235	292.051	Bd1-1vsBd3-1	CG
Bd1	74800531	74800953	423	21	0.0531755	0.934674	-0.881499	-291.07	Bd1-1vsBd3-1	CG
Bd1	8315398	8315492	95	15	0.960902	0.0583054	0.902597	290.897	Bd1-1vsBd3-1	CG
Bd1	25259002	25259303	302	57	0.142775	0.679302	-0.536527	-290.54	Bd1-1vsBd3-1	CG
Bd1	18164216	18164400	185	20	0.0895259	0.908143	-0.818617	-290.208	Bd1-1vsBd3-1	CG
Bd1	48515982	48516207	226	28	0.776638	0.0762971	0.700341	290.038	Bd1-1vsBd3-1	CG
Bd1	47022357	47022747	391	35	0.87977	0.0611908	0.818579	289.684	Bd1-1vsBd3-1	CG
Bd1	54840585	54840845	261	21	0.955502	0.0517886	0.903714	288.947	Bd1-1vsBd3-1	CG
Bd1	56752788	56753005	218	31	0.0537109	0.746445	-0.692734	-288.692	Bd1-1vsBd3-1	CG
Bd1	57348282	57348472	191	32	0.878695	0.164089	0.714607	288.353	Bd1-1vsBd3-1	CG
Bd1	57126181	57126429	249	33	0.869816	0.13521	0.734606	288.116	Bd1-1vsBd3-1	CG
Bd1	59671610	59672091	482	28	0.910926	0.0686398	0.842287	288.018	Bd1-1vsBd3-1	CG
Bd1	67782809	67783053	245	24	0.0498739	0.892585	-0.842711	-287.985	Bd1-1vsBd3-1	CG
Bd1	50421111	50421341	231	52	0.176826	0.77972	-0.602894	-287.803	Bd1-1vsBd3-1	CG
Bd1	60066448	60066886	439	30	0.871169	0.0877982	0.783371	287.554	Bd1-1vsBd3-1	CG
Bd1	60048025	60048254	230	42	0.932031	0.273472	0.658559	287.519	Bd1-1vsBd3-1	CG
Bd1	61406152	61406373	222	32	0.879557	0.0534812	0.826076	287.083	Bd1-1vsBd3-1	CG
Bd1	4906190	4906421	232	28	0.0859075	0.907236	-0.821329	-286.628	Bd1-1vsBd3-1	CG
Bd1	38250633	38251145	513	27	0.926214	0.0628638	0.863351	286.506	Bd1-1vsBd3-1	CG
Bd1	57680623	57680830	208	34	0.0388623	0.81322	-0.774357	-285.948	Bd1-1vsBd3-1	CG
Bd1	53742622	53743068	447	24	0.895828	0.0831301	0.812698	285.54	Bd1-1vsBd3-1	CG
Bd1	28054702	28054925	224	17	0.967216	0.0922956	0.87492	285.332	Bd1-1vsBd3-1	CG
Bd1	45323027	45323369	343	18	0.942659	0.0716848	0.870974	285.026	Bd1-1vsBd3-1	CG
Bd1	24291904	24292167	264	26	0.903005	0.0521394	0.850866	284.959	Bd1-1vsBd3-1	CG
Bd1	32005807	32005997	191	22	0.907957	0.0766752	0.831281	284.874	Bd1-1vsBd3-1	CG
Bd1	59676882	59677580	699	36	0.889488	0.06692	0.822568	283.861	Bd1-1vsBd3-1	CG
Bd1	54916016	54916758	743	43	0.922986	0.0962151	0.826771	283.708	Bd1-1vsBd3-1	CG
Bd1	55458060	55458294	235	24	0.921281	0.0609988	0.860282	283.49	Bd1-1vsBd3-1	CG
Bd1	17549471	17550005	535	31	0.0865924	0.937653	-0.851061	-283.127	Bd1-1vsBd3-1	CG
Bd1	34805079	34805297	219	20	0.0287946	0.927481	-0.898686	-281.806	Bd1-1vsBd3-1	CG
Bd1	51751105	51751476	372	33	0.870603	0.0845558	0.786048	281.539	Bd1-1vsBd3-1	CG
Bd1	57997966	57998346	381	43	0.94161	0.161174	0.780435	281.362	Bd1-1vsBd3-1	CG
Bd1	43618817	43619000	184	32	0.782389	0.0398796	0.742509	281.128	Bd1-1vsBd3-1	CG
Bd1	63771227	63771435	209	28	0.885993	0.0620627	0.823931	280.993	Bd1-1vsBd3-1	CG
Bd1	67339742	67339979	238	61	0.580787	0.157446	0.423341	280.947	Bd1-1vsBd3-1	CG
Bd1	61079111	61079444	334	24	0.100521	0.960931	-0.860411	-280.599	Bd1-1vsBd3-1	CG
Bd1	16108555	16108824	270	24	0.0597134	0.921903	-0.86219	-279.784	Bd1-1vsBd3-1	CG
Bd1	19093464	19093846	383	45	0.0820793	0.87466	-0.792581	-279.608	Bd1-1vsBd3-1	CG
Bd1	41810587	41810877	291	33	0.907866	0.051642	0.856224	279.065	Bd1-1vsBd3-1	CG
Bd1	15529075	15529285	211	16	0.936826	0.0391971	0.897629	278.602	Bd1-1vsBd3-1	CG
Bd1	148426	148667	242	26	0.0469469	0.863013	-0.816066	-278.505	Bd1-1vsBd3-1	CG
Bd1	39582301	39582659	359	25	0.110742	0.958128	-0.847387	-278.487	Bd1-1vsBd3-1	CG
Bd1	17288361	17288681	321	36	0.883442	0.125697	0.757745	278.13	Bd1-1vsBd3-1	CG
Bd1	8315124	8315329	206	18	0.91827	0.0647954	0.853475	277.929	Bd1-1vsBd3-1	CG
Bd1	47158500	47158768	269	24	0.075919	0.929507	-0.853588	-277.849	Bd1-1vsBd3-1	CG
Bd1	19738370	19738589	220	55	0.905314	0.304428	0.600886	277.383	Bd1-1vsBd3-1	CG
Bd1	72073534	72073708	175	22	0.946515	0.0546385	0.891876	277.171	Bd1-1vsBd3-1	CG
Bd1	22460074	22460385	312	35	0.107299	0.864617	-0.757318	-277.119	Bd1-1vsBd3-1	CG
Bd1	33417518	33417613	96	23	0.89385	0.0825585	0.811292	276.78	Bd1-1vsBd3-1	CG
Bd1	14656461	14656578	118	18	0.920025	0.0223803	0.897645	276.223	Bd1-1vsBd3-1	CG
Bd1	45276859	45277139	281	29	0.107337	0.865776	-0.758439	-276.155	Bd1-1vsBd3-1	CG
Bd1	49962716	49962981	266	63	0.477792	0.0689772	0.408815	275.992	Bd1-1vsBd3-1	CG
Bd1	33211988	33212243	256	26	0.96409	0.0836558	0.880434	275.011	Bd1-1vsBd3-1	CG
Bd1	23863133	23863482	350	24	0.0281084	0.863532	-0.835424	-274.62	Bd1-1vsBd3-1	CG
Bd1	332566	332872	307	30	0.0372551	0.775719	-0.738464	-273.931	Bd1-1vsBd3-1	CG
Bd1	54809035	54809308	274	14	0.0461213	0.95047	-0.904348	-273.745	Bd1-1vsBd3-1	CG
Bd1	59322310	59322640	331	24	0.0562872	0.942729	-0.886441	-273.202	Bd1-1vsBd3-1	CG
Bd1	47606894	47607075	182	48	0.0262348	0.545893	-0.519659	-273.198	Bd1-1vsBd3-1	CG
Bd1	34534843	34535050	208	22	0.962902	0.0882895	0.874612	272.707	Bd1-1vsBd3-1	CG
Bd1	58165977	58166223	247	22	0.0280498	0.909941	-0.881891	-272.453	Bd1-1vsBd3-1	CG
Bd1	7553437	7553649	213	24	0.0783897	0.945595	-0.867205	-272.373	Bd1-1vsBd3-1	CG
Bd1	38369028	38369139	112	17	0.0781162	0.919615	-0.841499	-272.11	Bd1-1vsBd3-1	CG
Bd1	40928104	40928277	174	25	0.844985	0.0536919	0.791293	272.092	Bd1-1vsBd3-1	CG
Bd1	65390471	65390735	265	18	0.897015	0.0240067	0.873008	271.926	Bd1-1vsBd3-1	CG
Bd1	23324491	23324653	163	29	0.0638993	0.939371	-0.875471	-271.667	Bd1-1vsBd3-1	CG
Bd1	22840945	22841157	213	19	0.0724417	0.93481	-0.862368	-270.878	Bd1-1vsBd3-1	CG
Bd1	25108135	25108258	124	36	0.329869	0.940333	-0.610464	-270.853	Bd1-1vsBd3-1	CG
Bd1	30794321	30794515	195	48	0.0299198	0.601935	-0.572015	-270.814	Bd1-1vsBd3-1	CG
Bd1	7317817	7318224	408	40	0.822104	0.0860546	0.736049	269.326	Bd1-1vsBd3-1	CG
Bd1	62947111	62947316	206	41	0.119787	0.904367	-0.78458	-268.518	Bd1-1vsBd3-1	CG
Bd1	31854361	31854511	151	22	0.804708	0.0756414	0.729067	267.401	Bd1-1vsBd3-1	CG
Bd1	25114270	25114472	203	25	0.102265	0.947088	-0.844823	-267.228	Bd1-1vsBd3-1	CG
Bd1	43826122	43826489	368	26	0.944785	0.0748926	0.869892	267.223	Bd1-1vsBd3-1	CG
Bd1	51957571	51957906	336	28	0.0562241	0.827612	-0.771388	-266.524	Bd1-1vsBd3-1	CG
Bd1	48905594	48905903	310	41	0.753312	0.14881	0.604502	266.504	Bd1-1vsBd3-1	CG
Bd1	55618081	55618200	120	24	0.828953	0.0404975	0.788456	266.468	Bd1-1vsBd3-1	CG
Bd1	40051433	40051953	521	38	0.125732	0.817168	-0.691436	-266.369	Bd1-1vsBd3-1	CG
Bd1	37125123	37125296	174	27	0.905813	0.131124	0.774689	266.356	Bd1-1vsBd3-1	CG
Bd1	70196523	70196725	203	21	0.932626	0.10333	0.829296	266.348	Bd1-1vsBd3-1	CG
Bd1	4128994	4129231	238	42	0.648248	0.0486468	0.599601	265.924	Bd1-1vsBd3-1	CG
Bd1	41340429	41340704	276	33	0.142646	0.903886	-0.76124	-265.656	Bd1-1vsBd3-1	CG
Bd1	28911772	28912097	326	31	0.902009	0.093166	0.808843	265.416	Bd1-1vsBd3-1	CG
Bd1	9900494	9900709	216	23	0.824463	0.0825889	0.741874	265.091	Bd1-1vsBd3-1	CG
Bd1	53268450	53268646	197	22	0.0756481	0.913775	-0.838127	-264.144	Bd1-1vsBd3-1	CG
Bd1	20389155	20389489	335	36	0.769103	0.0914575	0.677646	263.558	Bd1-1vsBd3-1	CG
Bd1	20564426	20564576	151	18	0.0715216	0.940328	-0.868807	-263.551	Bd1-1vsBd3-1	CG
Bd1	21043615	21044094	480	29	0.924946	0.0874822	0.837464	263.239	Bd1-1vsBd3-1	CG
Bd1	54502315	54502538	224	26	0.93752	0.204974	0.732546	263.234	Bd1-1vsBd3-1	CG
Bd1	35550796	35551124	329	21	0.136775	0.953268	-0.816493	-262.988	Bd1-1vsBd3-1	CG
Bd1	44139698	44140083	386	45	0.622818	0.0375449	0.585273	262.879	Bd1-1vsBd3-1	CG
Bd1	59317381	59317621	241	23	0.951679	0.10556	0.846119	262.855	Bd1-1vsBd3-1	CG
Bd1	52513367	52513531	165	24	0.826851	0.0269237	0.799928	262.774	Bd1-1vsBd3-1	CG
Bd1	52513093	52513193	101	16	0.946773	0.0378817	0.908891	262.401	Bd1-1vsBd3-1	CG
Bd1	9296539	9296789	251	36	0.169318	0.875531	-0.706213	-261.76	Bd1-1vsBd3-1	CG
Bd1	47305437	47305807	371	23	0.915184	0.0788727	0.836311	261.197	Bd1-1vsBd3-1	CG
Bd1	28343635	28343856	222	34	0.952034	0.122025	0.830009	260.812	Bd1-1vsBd3-1	CG
Bd1	36254491	36254728	238	28	0.943494	0.205318	0.738177	259.833	Bd1-1vsBd3-1	CG
Bd1	16158739	16159289	551	23	0.95947	0.111526	0.847944	259.147	Bd1-1vsBd3-1	CG
Bd1	45461736	45462035	300	25	0.908603	0.051513	0.85709	259.04	Bd1-1vsBd3-1	CG
Bd1	25984348	25984561	214	19	0.0921288	0.948241	-0.856112	-258.272	Bd1-1vsBd3-1	CG
Bd1	63282305	63282511	207	26	0.0913597	0.942663	-0.851303	-257.974	Bd1-1vsBd3-1	CG
Bd1	45337555	45337687	133	21	0.0558547	0.932189	-0.876334	-257.86	Bd1-1vsBd3-1	CG
Bd1	61860470	61860741	272	23	0.0952978	0.938724	-0.843426	-257.515	Bd1-1vsBd3-1	CG
Bd1	11528475	11528798	324	71	0.598273	0.0910218	0.507252	257.378	Bd1-1vsBd3-1	CG
Bd1	69126208	69126521	314	22	0.961353	0.114408	0.846945	257.288	Bd1-1vsBd3-1	CG
Bd1	49059269	49059414	146	14	0.962892	0.0487705	0.914122	256.87	Bd1-1vsBd3-1	CG
Bd1	11934499	11934724	226	40	0.785243	0.0739087	0.711334	256.832	Bd1-1vsBd3-1	CG
Bd1	9136631	9137148	518	23	0.0819517	0.943755	-0.861803	-256.825	Bd1-1vsBd3-1	CG
Bd1	42322193	42322385	193	19	0.905865	0.0558622	0.850003	256.775	Bd1-1vsBd3-1	CG
Bd1	54224754	54225242	489	31	0.772774	0.0658077	0.706966	256.452	Bd1-1vsBd3-1	CG
Bd1	2652126	2652260	135	22	0.933529	0.0618101	0.871719	256.318	Bd1-1vsBd3-1	CG
Bd1	49153866	49154018	153	24	0.947007	0.0826818	0.864325	256.308	Bd1-1vsBd3-1	CG
Bd1	30482657	30483022	366	41	0.138488	0.830006	-0.691519	-256.027	Bd1-1vsBd3-1	CG
Bd1	60902477	60902686	210	27	0.935428	0.105363	0.830065	255.877	Bd1-1vsBd3-1	CG
Bd1	6476589	6476916	328	25	0.0773404	0.901329	-0.823989	-255.867	Bd1-1vsBd3-1	CG
Bd1	51894912	51895178	267	19	0.0574296	0.960654	-0.903224	-255.729	Bd1-1vsBd3-1	CG
Bd1	1682999	1683351	353	41	0.18759	0.889662	-0.702072	-255.26	Bd1-1vsBd3-1	CG
Bd1	2916745	2916931	187	38	0.699988	0.0645325	0.635456	254.785	Bd1-1vsBd3-1	CG
Bd1	64498538	64498785	248	31	0.0767711	0.936067	-0.859296	-254.7	Bd1-1vsBd3-1	CG
Bd1	55673187	55673396	210	21	0.0909073	0.9342	-0.843293	-254.355	Bd1-1vsBd3-1	CG
Bd1	7792356	7792503	148	34	0.870238	0.158146	0.712092	253.874	Bd1-1vsBd3-1	CG
Bd1	8616297	8616586	290	50	0.728483	0.248871	0.479612	253.491	Bd1-1vsBd3-1	CG
Bd1	31642781	31642937	157	24	0.0616633	0.892612	-0.830949	-253.314	Bd1-1vsBd3-1	CG
Bd1	30971355	30971537	183	19	0.0508847	0.955033	-0.904148	-253.075	Bd1-1vsBd3-1	CG
Bd1	60690668	60690941	274	29	0.106703	0.943586	-0.836883	-253.021	Bd1-1vsBd3-1	CG
Bd1	61406599	61408159	1561	24	0.0713345	0.952927	-0.881593	-252.826	Bd1-1vsBd3-1	CG
Bd1	23245021	23245163	143	17	0.942066	0.0492867	0.892779	252.627	Bd1-1vsBd3-1	CG
Bd1	35952865	35953193	329	38	0.126341	0.95789	-0.831549	-252.575	Bd1-1vsBd3-1	CG
Bd1	42112640	42112833	194	47	0.107508	0.630836	-0.523329	-251.802	Bd1-1vsBd3-1	CG
Bd1	18737654	18737958	305	33	0.917602	0.147147	0.770454	251.763	Bd1-1vsBd3-1	CG
Bd1	32780136	32780538	403	27	0.195733	0.944565	-0.748832	-251.62	Bd1-1vsBd3-1	CG
Bd1	56924814	56925059	246	44	0.0742651	0.688927	-0.614662	-250.93	Bd1-1vsBd3-1	CG
Bd1	51501100	51501323	224	22	0.907106	0.0696468	0.837459	250.884	Bd1-1vsBd3-1	CG
Bd1	23380685	23380808	124	26	0.855319	0.0500505	0.805269	250.216	Bd1-1vsBd3-1	CG
Bd1	57665389	57665769	381	51	0.636237	0.0771819	0.559055	249.923	Bd1-1vsBd3-1	CG
Bd1	57326672	57326872	201	36	0.0262581	0.679998	-0.65374	-249.858	Bd1-1vsBd3-1	CG
Bd1	74416366	74416689	324	61	0.282046	0.725412	-0.443366	-249.851	Bd1-1vsBd3-1	CG
Bd1	32874890	32875206	317	30	0.902066	0.12133	0.780736	249.727	Bd1-1vsBd3-1	CG
Bd1	56447824	56448279	456	27	0.0509401	0.866297	-0.815357	-249.467	Bd1-1vsBd3-1	CG
Bd1	47316226	47316365	140	17	0.0435128	0.953533	-0.91002	-249.289	Bd1-1vsBd3-1	CG
Bd1	51501388	51501850	463	25	0.924	0.102789	0.821211	248.692	Bd1-1vsBd3-1	CG
Bd1	61748771	61748965	195	21	0.146813	0.9549	-0.808086	-248.471	Bd1-1vsBd3-1	CG
Bd1	55954484	55954766	283	26	0.194753	0.946534	-0.751781	-248.366	Bd1-1vsBd3-1	CG
Bd1	29325567	29325834	268	22	0.901894	0.0966554	0.805238	248.319	Bd1-1vsBd3-1	CG
Bd1	2620004	2620149	146	25	0.937739	0.194068	0.743671	246.688	Bd1-1vsBd3-1	CG
Bd1	34344045	34344295	251	21	0.904089	0.0511363	0.852953	246.592	Bd1-1vsBd3-1	CG
Bd1	17499951	17500178	228	23	0.108335	0.877891	-0.769556	-245.225	Bd1-1vsBd3-1	CG
Bd1	51096274	51096484	211	21	0.0582845	0.961816	-0.903532	-245.018	Bd1-1vsBd3-1	CG
Bd1	29000683	29000868	186	30	0.0445999	0.855909	-0.811309	-244.986	Bd1-1vsBd3-1	CG
Bd1	23042388	23042704	317	37	0.908959	0.0737835	0.835176	244.817	Bd1-1vsBd3-1	CG
Bd1	54497682	54498207	526	23	0.912154	0.090917	0.821237	244.682	Bd1-1vsBd3-1	CG
Bd1	49217548	49217765	218	19	0.930308	0.0540769	0.876231	244.452	Bd1-1vsBd3-1	CG
Bd1	33378425	33378677	253	18	0.972202	0.140785	0.831417	244.329	Bd1-1vsBd3-1	CG
Bd1	34287665	34287860	196	34	0.728357	0.0581005	0.670256	244.267	Bd1-1vsBd3-1	CG
Bd1	38078260	38078528	269	27	0.901867	0.0985721	0.803295	244.096	Bd1-1vsBd3-1	CG
Bd1	51818533	51818739	207	26	0.857509	0.0460017	0.811508	243.952	Bd1-1vsBd3-1	CG
Bd1	67182008	67182304	297	23	0.0710783	0.899853	-0.828775	-243.915	Bd1-1vsBd3-1	CG
Bd1	2470008	2470373	366	26	0.864778	0.0817831	0.782994	243.901	Bd1-1vsBd3-1	CG
Bd1	789736	789935	200	27	0.877562	0.0940796	0.783482	243.398	Bd1-1vsBd3-1	CG
Bd1	25076177	25076427	251	22	0.913195	0.0991655	0.814029	242.966	Bd1-1vsBd3-1	CG
Bd1	5884973	5885256	284	27	0.0762896	0.937011	-0.860722	-242.391	Bd1-1vsBd3-1	CG
Bd1	46896389	46896533	145	20	0.060173	0.912209	-0.852036	-242.356	Bd1-1vsBd3-1	CG
Bd1	2419908	2420183	276	22	0.930042	0.0808134	0.849229	242.244	Bd1-1vsBd3-1	CG
Bd1	45449104	45449936	833	20	0.953959	0.0661828	0.887776	242.025	Bd1-1vsBd3-1	CG
Bd1	5160222	5161073	852	28	0.925081	0.074796	0.850285	241.495	Bd1-1vsBd3-1	CG
Bd1	3201028	3201487	460	33	0.873677	0.0877813	0.785896	241.447	Bd1-1vsBd3-1	CG
Bd1	27472917	27473135	219	33	0.749414	0.0507035	0.69871	241.408	Bd1-1vsBd3-1	CG
Bd1	34663154	34663464	311	20	0.898345	0.0594923	0.838852	241.327	Bd1-1vsBd3-1	CG
Bd1	35554468	35554885	418	29	0.129615	0.953638	-0.824023	-241.312	Bd1-1vsBd3-1	CG
Bd1	45079748	45080211	464	30	0.799146	0.0819544	0.717191	241.284	Bd1-1vsBd3-1	CG
Bd1	69861820	69862023	204	28	0.0889981	0.842004	-0.753006	-241.168	Bd1-1vsBd3-1	CG
Bd1	36437382	36437641	260	16	0.0627216	0.944538	-0.881817	-241.16	Bd1-1vsBd3-1	CG
Bd1	47783511	47783632	122	18	0.912547	0.059292	0.853255	240.926	Bd1-1vsBd3-1	CG
Bd1	53036112	53036209	98	18	0.913664	0.0481162	0.865548	240.891	Bd1-1vsBd3-1	CG
Bd1	23517051	23517190	140	28	0.862589	0.231511	0.631077	240.825	Bd1-1vsBd3-1	CG
Bd1	33337703	33338040	338	18	0.938137	0.0681854	0.869952	240.608	Bd1-1vsBd3-1	CG
Bd1	60551417	60551734	318	22	0.884547	0.0895133	0.795034	240.568	Bd1-1vsBd3-1	CG
Bd1	2760519	2760674	156	22	0.0802236	0.941334	-0.86111	-240.557	Bd1-1vsBd3-1	CG
Bd1	47738462	47738647	186	42	0.0579819	0.791919	-0.733938	-240.427	Bd1-1vsBd3-1	CG
Bd1	71279739	71279965	227	25	0.924714	0.0947979	0.829916	240.419	Bd1-1vsBd3-1	CG
Bd1	25476088	25476247	160	28	0.8351	0.0747158	0.760384	240.299	Bd1-1vsBd3-1	CG
Bd1	65119416	65119887	472	28	0.158467	0.882794	-0.724327	-240.272	Bd1-1vsBd3-1	CG
Bd1	9563330	9563578	249	16	0.931049	0.0493281	0.881721	240.111	Bd1-1vsBd3-1	CG
Bd1	14311094	14311168	75	14	0.955914	0.0264154	0.929499	240.003	Bd1-1vsBd3-1	CG
Bd1	72780019	72780229	211	23	0.796197	0.0739907	0.722206	239.917	Bd1-1vsBd3-1	CG
Bd1	67969016	67969292	277	34	0.115686	0.948944	-0.833258	-239.466	Bd1-1vsBd3-1	CG
Bd1	56541137	56541614	478	25	0.105776	0.941642	-0.835866	-239.302	Bd1-1vsBd3-1	CG
Bd1	39638002	39638292	291	37	0.895852	0.245902	0.649949	238.918	Bd1-1vsBd3-1	CG
Bd1	58165621	58165791	171	30	0.0579386	0.90294	-0.845001	-238.824	Bd1-1vsBd3-1	CG
Bd1	45617327	45617607	281	26	0.0644948	0.911725	-0.84723	-238.818	Bd1-1vsBd3-1	CG
Bd1	41044035	41044262	228	22	0.0920351	0.928231	-0.836196	-238.536	Bd1-1vsBd3-1	CG
Bd1	6055888	6056169	282	50	0.547934	0.0377989	0.510136	238.426	Bd1-1vsBd3-1	CG
Bd1	52765718	52765913	196	22	0.945201	0.0773402	0.86786	238.278	Bd1-1vsBd3-1	CG
Bd1	6164201	6164424	224	14	0.922704	0.09667	0.826034	237.765	Bd1-1vsBd3-1	CG
Bd1	19104593	19104830	238	32	0.870851	0.0616393	0.809212	237.244	Bd1-1vsBd3-1	CG
Bd1	25129290	25129869	580	33	0.799414	0.0703882	0.729026	236.666	Bd1-1vsBd3-1	CG
Bd1	34353440	34353836	397	18	0.0861963	0.934577	-0.84838	-236.509	Bd1-1vsBd3-1	CG
Bd1	47874605	47874922	318	32	0.853334	0.0755309	0.777804	236.392	Bd1-1vsBd3-1	CG
Bd1	6103129	6103200	72	20	0.859522	0.0432824	0.816239	236.29	Bd1-1vsBd3-1	CG
Bd1	71584282	71584441	160	19	0.099701	0.95814	-0.858439	-236.279	Bd1-1vsBd3-1	CG
Bd1	8668720	8668877	158	22	0.872448	0.158779	0.713669	236.228	Bd1-1vsBd3-1	CG
Bd1	26120433	26120638	206	18	0.0816071	0.963479	-0.881872	-235.973	Bd1-1vsBd3-1	CG
Bd1	5700688	5701069	382	26	0.0898901	0.860923	-0.771033	-235.423	Bd1-1vsBd3-1	CG
Bd1	12184383	12184571	189	20	0.970771	0.0550612	0.91571	235.023	Bd1-1vsBd3-1	CG
Bd1	41798342	41798708	367	26	0.931086	0.0651236	0.865963	234.592	Bd1-1vsBd3-1	CG
Bd1	45448433	45449000	568	22	0.903771	0.0661897	0.837581	234.522	Bd1-1vsBd3-1	CG
Bd1	24039921	24040110	190	26	0.850856	0.108466	0.74239	234.44	Bd1-1vsBd3-1	CG
Bd1	15113455	15113665	211	32	0.838851	0.0760584	0.762792	234.176	Bd1-1vsBd3-1	CG
Bd1	11977659	11978469	811	21	0.935744	0.0612794	0.874464	234.051	Bd1-1vsBd3-1	CG
Bd1	47102904	47103031	128	31	0.807577	0.0342996	0.773277	233.898	Bd1-1vsBd3-1	CG
Bd1	74667012	74667237	226	25	0.189715	0.915183	-0.725468	-233.725	Bd1-1vsBd3-1	CG
Bd1	2202544	2202688	145	31	0.155546	0.935234	-0.779687	-233.182	Bd1-1vsBd3-1	CG
Bd1	26163172	26163349	178	31	0.0597253	0.810716	-0.750991	-233.077	Bd1-1vsBd3-1	CG
Bd1	1279968	1280119	152	34	0.800943	0.0620277	0.738915	232.928	Bd1-1vsBd3-1	CG
Bd1	53414758	53414990	233	12	0.878772	0.0544406	0.824332	232.847	Bd1-1vsBd3-1	CG
Bd1	7634816	7635058	243	16	0.969638	0.0508546	0.918783	232.715	Bd1-1vsBd3-1	CG
Bd1	61471203	61471279	77	20	0.88345	0.0583202	0.82513	232.563	Bd1-1vsBd3-1	CG
Bd1	9787403	9787664	262	22	0.944816	0.0975648	0.847251	232.198	Bd1-1vsBd3-1	CG
Bd1	2473420	2473738	319	22	0.907257	0.056376	0.850881	232.198	Bd1-1vsBd3-1	CG
Bd1	42223326	42223609	284	23	0.0862424	0.935254	-0.849011	-232.197	Bd1-1vsBd3-1	CG
Bd1	55304520	55304714	195	25	0.867186	0.0940134	0.773172	232.162	Bd1-1vsBd3-1	CG
Bd1	12091493	12091633	141	14	0.0371462	0.954946	-0.9178	-232.036	Bd1-1vsBd3-1	CG
Bd1	19168396	19168528	133	17	0.0598412	0.939631	-0.87979	-231.829	Bd1-1vsBd3-1	CG
Bd1	67316150	67316504	355	22	0.107435	0.919155	-0.811721	-231.633	Bd1-1vsBd3-1	CG
Bd1	59954606	59954885	280	22	0.945983	0.0893317	0.856652	231.624	Bd1-1vsBd3-1	CG
Bd1	59065065	59065239	175	30	0.728609	0.0457147	0.682894	231.332	Bd1-1vsBd3-1	CG
Bd1	9299476	9299631	156	31	0.890661	0.0938117	0.79685	231.276	Bd1-1vsBd3-1	CG
Bd1	26076847	26076935	89	17	0.945296	0.101089	0.844207	231.043	Bd1-1vsBd3-1	CG
Bd1	45579380	45579781	402	24	0.963945	0.122722	0.841223	230.67	Bd1-1vsBd3-1	CG
Bd1	19087651	19087910	260	38	0.805872	0.278791	0.527081	230.602	Bd1-1vsBd3-1	CG
Bd1	37659411	37659991	581	24	0.115581	0.949607	-0.834026	-230.492	Bd1-1vsBd3-1	CG
Bd1	25612643	25612770	128	18	0.962336	0.142831	0.819505	230.227	Bd1-1vsBd3-1	CG
Bd1	43934846	43935675	830	35	0.964603	0.326644	0.637959	229.981	Bd1-1vsBd3-1	CG
Bd1	21898379	21898575	197	14	0.924843	0.038963	0.88588	229.767	Bd1-1vsBd3-1	CG
Bd1	72148839	72149091	253	37	0.819852	0.0893195	0.730533	229.579	Bd1-1vsBd3-1	CG
Bd1	14707709	14707920	212	38	0.168444	0.744319	-0.575874	-229.572	Bd1-1vsBd3-1	CG
Bd1	56686753	56686886	134	20	0.9383	0.0589221	0.879378	229.287	Bd1-1vsBd3-1	CG
Bd1	30923133	30923422	290	30	0.0826366	0.862484	-0.779847	-229.253	Bd1-1vsBd3-1	CG
Bd1	59670443	59671314	872	24	0.862184	0.0851848	0.776999	229.082	Bd1-1vsBd3-1	CG
Bd1	60094720	60094953	234	23	0.909543	0.0793429	0.8302	228.418	Bd1-1vsBd3-1	CG
Bd1	11320453	11320671	219	24	0.83472	0.058375	0.776345	228.303	Bd1-1vsBd3-1	CG
Bd1	51069610	51069994	385	56	0.738043	0.188798	0.549245	227.97	Bd1-1vsBd3-1	CG
Bd1	62067382	62067728	347	28	0.067215	0.855026	-0.787811	-227.929	Bd1-1vsBd3-1	CG
Bd1	64272969	64273132	164	27	0.0524705	0.921051	-0.868581	-227.362	Bd1-1vsBd3-1	CG
Bd1	62322251	62322539	289	35	0.835617	0.159035	0.676582	227.305	Bd1-1vsBd3-1	CG
Bd1	73107367	73107731	365	30	0.132013	0.965877	-0.833864	-227.071	Bd1-1vsBd3-1	CG
Bd1	3078585	3078982	398	21	0.93219	0.0694256	0.862764	227.028	Bd1-1vsBd3-1	CG
Bd1	20570289	20570492	204	24	0.792164	0.0746091	0.717555	226.945	Bd1-1vsBd3-1	CG
Bd1	47985939	47986216	278	20	0.0801644	0.919971	-0.839807	-226.753	Bd1-1vsBd3-1	CG
Bd1	33837578	33837778	201	20	0.0965294	0.942873	-0.846344	-226.656	Bd1-1vsBd3-1	CG
Bd1	54807301	54807555	255	37	0.143151	0.721058	-0.577908	-225.803	Bd1-1vsBd3-1	CG
Bd1	58073006	58073195	190	27	0.882677	0.0804684	0.802208	225.778	Bd1-1vsBd3-1	CG
Bd1	61882586	61882982	397	26	0.929927	0.0898843	0.840043	225.643	Bd1-1vsBd3-1	CG
Bd1	33418225	33418330	106	28	0.842288	0.0776815	0.764606	225.575	Bd1-1vsBd3-1	CG
Bd1	60781840	60782090	251	39	0.704199	0.0590844	0.645114	225.379	Bd1-1vsBd3-1	CG
Bd1	28667237	28667310	74	18	0.115034	0.93826	-0.823226	-224.843	Bd1-1vsBd3-1	CG
Bd1	28652117	28652439	323	44	0.0476842	0.792064	-0.74438	-224.774	Bd1-1vsBd3-1	CG
Bd1	68286616	68286905	290	33	0.816525	0.0798971	0.736628	224.623	Bd1-1vsBd3-1	CG
Bd1	4663461	4663564	104	17	0.065557	0.952078	-0.886521	-224.524	Bd1-1vsBd3-1	CG
Bd1	62632398	62632615	218	22	0.971582	0.103219	0.868363	224.419	Bd1-1vsBd3-1	CG
Bd1	52026294	52026575	282	26	0.884889	0.0673147	0.817574	224.248	Bd1-1vsBd3-1	CG
Bd1	51382216	51382398	183	24	0.148046	0.951281	-0.803234	-224.128	Bd1-1vsBd3-1	CG
Bd1	19084024	19084436	413	17	0.0616876	0.912807	-0.851119	-224.128	Bd1-1vsBd3-1	CG
Bd1	46753749	46754088	340	54	0.475644	0.0491032	0.42654	223.826	Bd1-1vsBd3-1	CG
Bd1	48807930	48808414	485	32	0.111255	0.819106	-0.707851	-223.822	Bd1-1vsBd3-1	CG
Bd1	27314660	27314841	182	24	0.771134	0.0607221	0.710412	223.553	Bd1-1vsBd3-1	CG
Bd1	46884685	46885099	415	24	0.0752742	0.939669	-0.864395	-222.773	Bd1-1vsBd3-1	CG
Bd1	7494354	7494583	230	33	0.106927	0.92972	-0.822793	-222.033	Bd1-1vsBd3-1	CG
Bd1	69870320	69870441	122	17	0.0427864	0.919347	-0.87656	-221.928	Bd1-1vsBd3-1	CG
Bd1	19102945	19103423	479	39	0.821675	0.257626	0.564048	221.904	Bd1-1vsBd3-1	CG
Bd1	9475997	9476386	390	36	0.890383	0.111371	0.779012	221.756	Bd1-1vsBd3-1	CG
Bd1	14306800	14307225	426	49	0.840316	0.230479	0.609837	221.419	Bd1-1vsBd3-1	CG
Bd1	1650193	1650381	189	20	0.922176	0.111347	0.810829	221.299	Bd1-1vsBd3-1	CG
Bd1	44893489	44893862	374	25	0.203161	0.909688	-0.706527	-221.289	Bd1-1vsBd3-1	CG
Bd1	59861935	59862217	283	26	0.905104	0.08515	0.819954	221.1	Bd1-1vsBd3-1	CG
Bd1	48945776	48946250	475	25	0.912653	0.0894516	0.823201	221.077	Bd1-1vsBd3-1	CG
Bd1	47783915	47784573	659	50	0.908363	0.124323	0.784039	220.884	Bd1-1vsBd3-1	CG
Bd1	41943246	41943400	155	23	0.812426	0.0829756	0.72945	220.845	Bd1-1vsBd3-1	CG
Bd1	20532553	20532631	79	12	0.861638	0.0360465	0.825592	220.6	Bd1-1vsBd3-1	CG
Bd1	21815177	21815485	309	14	0.965894	0.145926	0.819968	220.152	Bd1-1vsBd3-1	CG
Bd1	791545	791904	360	32	0.173452	0.961534	-0.788081	-220.042	Bd1-1vsBd3-1	CG
Bd1	71175535	71175794	260	21	0.0524712	0.881677	-0.829206	-219.848	Bd1-1vsBd3-1	CG
Bd1	14189096	14189359	264	30	0.228452	0.915254	-0.686801	-219.768	Bd1-1vsBd3-1	CG
Bd1	40405443	40405711	269	24	0.884604	0.111684	0.77292	219.313	Bd1-1vsBd3-1	CG
Bd1	32301420	32301640	221	25	0.786018	0.0538045	0.732213	219.077	Bd1-1vsBd3-1	CG
Bd1	57038502	57038613	112	11	0.170055	0.964367	-0.794312	-218.553	Bd1-1vsBd3-1	CG
Bd1	43544860	43545056	197	24	0.0455651	0.762913	-0.717348	-218.277	Bd1-1vsBd3-1	CG
Bd1	32954599	32954833	235	31	0.212	0.909388	-0.697388	-217.921	Bd1-1vsBd3-1	CG
Bd1	55246879	55247047	169	15	0.942988	0.0370318	0.905956	217.86	Bd1-1vsBd3-1	CG
Bd1	58153475	58153638	164	22	0.944724	0.353342	0.591383	217.84	Bd1-1vsBd3-1	CG
Bd1	977107	977290	184	30	0.108861	0.731466	-0.622606	-217.532	Bd1-1vsBd3-1	CG
Bd1	17493778	17494193	416	34	0.837118	0.093403	0.743715	217.518	Bd1-1vsBd3-1	CG
Bd1	60274341	60274910	570	31	0.873331	0.0572893	0.816042	217.42	Bd1-1vsBd3-1	CG
Bd1	22399515	22399774	260	25	0.128815	0.933441	-0.804626	-217.281	Bd1-1vsBd3-1	CG
Bd1	47787878	47788049	172	20	0.83273	0.0531206	0.77961	217.268	Bd1-1vsBd3-1	CG
Bd1	30211361	30211464	104	26	0.930773	0.0609994	0.869774	216.884	Bd1-1vsBd3-1	CG
Bd1	45494530	45494904	375	31	0.898914	0.109161	0.789753	216.878	Bd1-1vsBd3-1	CG
Bd1	41600525	41600725	201	23	0.0794889	0.848645	-0.769156	-216.596	Bd1-1vsBd3-1	CG
Bd1	65226338	65226517	180	36	0.0618811	0.7203	-0.658419	-216.323	Bd1-1vsBd3-1	CG
Bd1	70711124	70711374	251	25	0.881047	0.108187	0.772861	216.187	Bd1-1vsBd3-1	CG
Bd1	61961435	61961847	413	22	0.887478	0.0627436	0.824735	216.032	Bd1-1vsBd3-1	CG
Bd1	56729580	56729837	258	28	0.0498691	0.867663	-0.817794	-216.011	Bd1-1vsBd3-1	CG
Bd1	64852114	64852271	158	26	0.0818183	0.834892	-0.753074	-215.874	Bd1-1vsBd3-1	CG
Bd1	71733935	71734144	210	25	0.068675	0.868047	-0.799372	-215.866	Bd1-1vsBd3-1	CG
Bd1	9086873	9087076	204	21	0.926286	0.0946065	0.831679	215.016	Bd1-1vsBd3-1	CG
Bd1	34350905	34351340	436	18	0.0675085	0.93794	-0.870432	-214.967	Bd1-1vsBd3-1	CG
Bd1	53838446	53838695	250	21	0.0798305	0.921204	-0.841373	-214.882	Bd1-1vsBd3-1	CG
Bd1	7591088	7591333	246	17	0.0717942	0.92912	-0.857325	-214.803	Bd1-1vsBd3-1	CG
Bd1	30786180	30786361	182	18	0.0470423	0.902177	-0.855135	-214.697	Bd1-1vsBd3-1	CG
Bd1	19096715	19097028	314	35	0.797828	0.0712213	0.726607	214.662	Bd1-1vsBd3-1	CG
Bd1	69617939	69618193	255	33	0.765352	0.112952	0.652399	214.638	Bd1-1vsBd3-1	CG
Bd1	17197112	17197268	157	25	0.824417	0.138391	0.686026	214.39	Bd1-1vsBd3-1	CG
Bd1	58256474	58256830	357	29	0.96298	0.143187	0.819793	214.154	Bd1-1vsBd3-1	CG
Bd1	16079981	16080241	261	20	0.922819	0.0704845	0.852334	214.139	Bd1-1vsBd3-1	CG
Bd1	73635222	73635577	356	30	0.908795	0.100392	0.808403	214.055	Bd1-1vsBd3-1	CG
Bd1	73108203	73108455	253	23	0.0857642	0.876024	-0.79026	-214.004	Bd1-1vsBd3-1	CG
Bd1	23147603	23147727	125	15	0.0368618	0.925967	-0.889105	-213.968	Bd1-1vsBd3-1	CG
Bd1	21406977	21407145	169	25	0.875878	0.162103	0.713775	213.758	Bd1-1vsBd3-1	CG
Bd1	73688880	73689102	223	20	0.962528	0.113206	0.849322	213.547	Bd1-1vsBd3-1	CG
Bd1	33160844	33161130	287	29	0.176214	0.927391	-0.751177	-213.501	Bd1-1vsBd3-1	CG
Bd1	47944498	47944768	271	15	0.957595	0.0793588	0.878237	213.489	Bd1-1vsBd3-1	CG
Bd1	73775854	73776051	198	33	0.618516	0.0452889	0.573227	213.424	Bd1-1vsBd3-1	CG
Bd1	7175679	7176013	335	12	0.926132	0.0291657	0.896967	213.37	Bd1-1vsBd3-1	CG
Bd1	70247597	70247812	216	19	0.958841	0.0690932	0.889748	213.211	Bd1-1vsBd3-1	CG
Bd1	60820184	60820524	341	26	0.0782622	0.912822	-0.83456	-213.165	Bd1-1vsBd3-1	CG
Bd1	52408639	52408725	87	11	0.969769	0.0249956	0.944774	212.981	Bd1-1vsBd3-1	CG
Bd1	60818829	60819119	291	17	0.0963274	0.858928	-0.762601	-212.914	Bd1-1vsBd3-1	CG
Bd1	70186035	70186356	322	16	0.838294	0.0483287	0.789966	212.769	Bd1-1vsBd3-1	CG
Bd1	19749892	19750001	110	13	0.947633	0.038376	0.909257	212.495	Bd1-1vsBd3-1	CG
Bd1	16225287	16225452	166	23	0.896209	0.0761952	0.820014	212.396	Bd1-1vsBd3-1	CG
Bd1	57681311	57681576	266	25	0.0447122	0.855555	-0.810843	-212.333	Bd1-1vsBd3-1	CG
Bd1	21067295	21067458	164	26	0.114849	0.901266	-0.786417	-212.208	Bd1-1vsBd3-1	CG
Bd1	41885619	41885858	240	24	0.0558104	0.877067	-0.821257	-212.053	Bd1-1vsBd3-1	CG
Bd1	32405379	32405638	260	25	0.0756692	0.832934	-0.757264	-211.928	Bd1-1vsBd3-1	CG
Bd1	49265499	49265552	54	16	0.0239625	0.863278	-0.839315	-211.583	Bd1-1vsBd3-1	CG
Bd1	69167861	69168193	333	31	0.10912	0.915036	-0.805916	-211.523	Bd1-1vsBd3-1	CG
Bd1	60543632	60544066	435	13	0.962682	0.0608617	0.90182	211.458	Bd1-1vsBd3-1	CG
Bd1	30297105	30297690	586	33	0.913068	0.131404	0.781664	211.327	Bd1-1vsBd3-1	CG
Bd1	64876166	64876603	438	36	0.0883509	0.802278	-0.713927	-210.327	Bd1-1vsBd3-1	CG
Bd1	22231883	22232125	243	22	0.960774	0.0790564	0.881717	210.106	Bd1-1vsBd3-1	CG
Bd1	40317565	40317714	150	19	0.827349	0.0672639	0.760085	210.09	Bd1-1vsBd3-1	CG
Bd1	5471206	5471440	235	22	0.941334	0.0758556	0.865478	209.937	Bd1-1vsBd3-1	CG
Bd1	63073875	63074232	358	38	0.860788	0.108123	0.752665	209.916	Bd1-1vsBd3-1	CG
Bd1	33316534	33316737	204	27	0.246343	0.886299	-0.639956	-209.688	Bd1-1vsBd3-1	CG
Bd1	27844555	27845034	480	20	0.90909	0.0854025	0.823687	209.636	Bd1-1vsBd3-1	CG
Bd1	70745965	70746170	206	13	0.950583	0.0455345	0.905048	209.604	Bd1-1vsBd3-1	CG
Bd1	47468052	47468388	337	25	0.818922	0.0883312	0.730591	209.506	Bd1-1vsBd3-1	CG
Bd1	37662475	37662660	186	26	0.0716348	0.920533	-0.848898	-209.286	Bd1-1vsBd3-1	CG
Bd1	46093772	46093990	219	28	0.930803	0.366302	0.564501	209.171	Bd1-1vsBd3-1	CG
Bd1	21840018	21840149	132	16	0.972019	0.113591	0.858428	209.007	Bd1-1vsBd3-1	CG
Bd1	1945339	1945483	145	51	0.059023	0.594828	-0.535805	-208.173	Bd1-1vsBd3-1	CG
Bd1	736761	737697	937	28	0.923831	0.118966	0.804865	207.995	Bd1-1vsBd3-1	CG
Bd1	1413469	1413706	238	49	0.126402	0.701542	-0.57514	-207.591	Bd1-1vsBd3-1	CG
Bd1	47305887	47306243	357	29	0.959826	0.130634	0.829192	207.544	Bd1-1vsBd3-1	CG
Bd1	25112491	25112595	105	22	0.150798	0.961992	-0.811194	-207.392	Bd1-1vsBd3-1	CG
Bd1	29960861	29961306	446	23	0.890337	0.0610173	0.829319	207.327	Bd1-1vsBd3-1	CG
Bd1	2862152	2862343	192	15	0.921697	0.0474345	0.874262	207.212	Bd1-1vsBd3-1	CG
Bd1	68995800	68995965	166	24	0.176095	0.831325	-0.65523	-207.206	Bd1-1vsBd3-1	CG
Bd1	34352770	34353065	296	20	0.138933	0.948386	-0.809453	-207.109	Bd1-1vsBd3-1	CG
Bd1	72373785	72373921	137	14	0.0703388	0.929973	-0.859634	-207.066	Bd1-1vsBd3-1	CG
Bd1	6973944	6974106	163	13	0.965084	0.0481314	0.916952	206.882	Bd1-1vsBd3-1	CG
Bd1	25373420	25373669	250	23	0.887324	0.172943	0.714381	206.747	Bd1-1vsBd3-1	CG
Bd1	50215588	50215905	318	18	0.0501463	0.938261	-0.888114	-206.117	Bd1-1vsBd3-1	CG
Bd1	59328634	59328989	356	22	0.844477	0.0684042	0.776073	205.928	Bd1-1vsBd3-1	CG
Bd1	19749656	19749836	181	30	0.729084	0.0562758	0.672809	205.343	Bd1-1vsBd3-1	CG
Bd1	60095152	60095320	169	19	0.939927	0.106508	0.833419	205.32	Bd1-1vsBd3-1	CG
Bd1	57998663	57998801	139	12	0.882033	0.01822	0.863813	205.208	Bd1-1vsBd3-1	CG
Bd1	28228630	28228893	264	17	0.94096	0.0784172	0.862543	205.194	Bd1-1vsBd3-1	CG
Bd1	4801893	4801957	65	21	0.0375454	0.765823	-0.728277	-205.098	Bd1-1vsBd3-1	CG
Bd1	64976499	64976762	264	24	0.946492	0.245292	0.7012	204.991	Bd1-1vsBd3-1	CG
Bd1	67313709	67313777	69	14	0.0224949	0.924792	-0.902297	-204.886	Bd1-1vsBd3-1	CG
Bd1	17765097	17765486	390	37	0.704735	0.0678307	0.636904	204.798	Bd1-1vsBd3-1	CG
Bd1	10725195	10725637	443	20	0.103508	0.87174	-0.768232	-204.796	Bd1-1vsBd3-1	CG
Bd1	62447834	62448161	328	27	0.881475	0.143561	0.737915	204.475	Bd1-1vsBd3-1	CG
Bd1	16813136	16813198	63	20	0.855852	0.110956	0.744896	204.142	Bd1-1vsBd3-1	CG
Bd1	37663682	37663962	281	20	0.051055	0.899691	-0.848636	-204.001	Bd1-1vsBd3-1	CG
Bd1	13959154	13959327	174	24	0.0973695	0.942695	-0.845326	-203.782	Bd1-1vsBd3-1	CG
Bd1	55144203	55144466	264	28	0.0544551	0.795368	-0.740913	-203.771	Bd1-1vsBd3-1	CG
Bd1	7724466	7724772	307	36	0.0792026	0.701652	-0.622449	-203.295	Bd1-1vsBd3-1	CG
Bd1	22232697	22232830	134	8	0.96718	0.0247891	0.942391	203.071	Bd1-1vsBd3-1	CG
Bd1	10301628	10301864	237	37	0.921717	0.194955	0.726763	202.928	Bd1-1vsBd3-1	CG
Bd1	73663793	73664003	211	28	0.0528383	0.82206	-0.769222	-202.678	Bd1-1vsBd3-1	CG
Bd1	30201966	30202039	74	26	0.707633	0.0381006	0.669533	202.553	Bd1-1vsBd3-1	CG
Bd1	40727078	40727363	286	21	0.944507	0.105263	0.839244	202.458	Bd1-1vsBd3-1	CG
Bd1	8977402	8977709	308	16	0.0447831	0.925489	-0.880706	-202.412	Bd1-1vsBd3-1	CG
Bd1	9643935	9644068	134	23	0.957948	0.0880826	0.869865	202.393	Bd1-1vsBd3-1	CG
Bd1	55092619	55092867	249	22	0.966351	0.103542	0.862809	202.209	Bd1-1vsBd3-1	CG
Bd1	60937429	60937820	392	24	0.130533	0.876093	-0.745559	-201.898	Bd1-1vsBd3-1	CG
Bd1	63646809	63647480	672	23	0.909836	0.0703567	0.839479	201.884	Bd1-1vsBd3-1	CG
Bd1	20421494	20421915	422	40	0.733558	0.07814	0.655418	201.881	Bd1-1vsBd3-1	CG
Bd1	9139497	9139974	478	30	0.310691	0.935154	-0.624463	-201.768	Bd1-1vsBd3-1	CG
Bd1	69703496	69703913	418	32	0.0986193	0.93582	-0.8372	-201.761	Bd1-1vsBd3-1	CG
Bd1	34661115	34661408	294	19	0.955762	0.222943	0.732819	201.712	Bd1-1vsBd3-1	CG
Bd1	69838536	69838841	306	17	0.0440126	0.91655	-0.872537	-201.688	Bd1-1vsBd3-1	CG
Bd1	23830947	23831317	371	33	0.0913835	0.812394	-0.72101	-201.687	Bd1-1vsBd3-1	CG
Bd1	59672959	59673107	149	19	0.920148	0.118687	0.801461	201.682	Bd1-1vsBd3-1	CG
Bd1	19224735	19224831	97	20	0.847059	0.0718362	0.775223	201.424	Bd1-1vsBd3-1	CG
Bd1	22303664	22303823	160	17	0.760314	0.0290625	0.731251	201.17	Bd1-1vsBd3-1	CG
Bd1	65227423	65227626	204	17	0.90165	0.0492699	0.85238	201.114	Bd1-1vsBd3-1	CG
Bd1	32949097	32949333	237	14	0.0461764	0.965062	-0.918886	-201.107	Bd1-1vsBd3-1	CG
Bd1	51494836	51494934	99	11	0.0480873	0.962476	-0.914388	-200.968	Bd1-1vsBd3-1	CG
Bd1	3507351	3507659	309	26	0.110991	0.932982	-0.821991	-200.786	Bd1-1vsBd3-1	CG
Bd1	52350744	52351042	299	13	0.932791	0.0610112	0.87178	200.575	Bd1-1vsBd3-1	CG
Bd1	20692488	20692754	267	38	0.0771795	0.692966	-0.615786	-199.469	Bd1-1vsBd3-1	CG
Bd1	39839483	39839747	265	17	0.110245	0.953569	-0.843324	-199.27	Bd1-1vsBd3-1	CG
Bd1	72774985	72775202	218	14	0.039245	0.938233	-0.898988	-199.159	Bd1-1vsBd3-1	CG
Bd1	41058287	41058531	245	22	0.0482345	0.896575	-0.84834	-199.041	Bd1-1vsBd3-1	CG
Bd1	46782197	46782414	218	43	0.264561	0.867775	-0.603213	-198.708	Bd1-1vsBd3-1	CG
Bd1	1418693	1418873	181	19	0.134816	0.930384	-0.795568	-198.234	Bd1-1vsBd3-1	CG
Bd1	64942793	64942935	143	21	0.908403	0.0958603	0.812543	198.086	Bd1-1vsBd3-1	CG
Bd1	14564877	14565202	326	28	0.757654	0.0669475	0.690706	197.945	Bd1-1vsBd3-1	CG
Bd1	73442627	73442934	308	20	0.0403859	0.856013	-0.815628	-197.85	Bd1-1vsBd3-1	CG
Bd1	66922365	66922518	154	40	0.865418	0.131639	0.733779	197.82	Bd1-1vsBd3-1	CG
Bd1	18750574	18750783	210	22	0.0705865	0.907478	-0.836892	-197.818	Bd1-1vsBd3-1	CG
Bd1	6748369	6748476	108	26	0.8822	0.0966677	0.785532	197.805	Bd1-1vsBd3-1	CG
Bd1	6330203	6330448	246	15	0.942348	0.0654583	0.87689	197.57	Bd1-1vsBd3-1	CG
Bd1	72963792	72964051	260	22	0.899436	0.053326	0.84611	197.478	Bd1-1vsBd3-1	CG
Bd1	27465796	27466336	541	20	0.883398	0.110389	0.773009	197.448	Bd1-1vsBd3-1	CG
Bd1	71324272	71325035	764	27	0.132838	0.86808	-0.735242	-197.223	Bd1-1vsBd3-1	CG
Bd1	29974744	29974862	119	26	0.785909	0.0576268	0.728283	196.974	Bd1-1vsBd3-1	CG
Bd1	21664292	21664407	116	38	0.845326	0.0675633	0.777763	196.804	Bd1-1vsBd3-1	CG
Bd1	4512026	4512189	164	29	0.143728	0.936237	-0.792509	-196.752	Bd1-1vsBd3-1	CG
Bd1	68601922	68602086	165	18	0.958386	0.102332	0.856054	196.744	Bd1-1vsBd3-1	CG
Bd1	38696741	38696929	189	20	0.821714	0.185427	0.636288	196.667	Bd1-1vsBd3-1	CG
Bd1	33479506	33479659	154	9	0.125663	0.949744	-0.824081	-196.576	Bd1-1vsBd3-1	CG
Bd1	61874807	61875083	277	18	0.925625	0.052168	0.873457	196.572	Bd1-1vsBd3-1	CG
Bd1	61130390	61130574	185	21	0.876913	0.0942881	0.782625	196.492	Bd1-1vsBd3-1	CG
Bd1	47137103	47137387	285	27	0.101541	0.933556	-0.832015	-196.229	Bd1-1vsBd3-1	CG
Bd1	32428807	32428905	99	15	0.972674	0.0599131	0.912761	196.094	Bd1-1vsBd3-1	CG
Bd1	29977851	29978063	213	13	0.0291601	0.96273	-0.93357	-196.045	Bd1-1vsBd3-1	CG
Bd1	4588971	4589116	146	32	0.245882	0.749404	-0.503523	-196.022	Bd1-1vsBd3-1	CG
Bd1	53324676	53325000	325	22	0.843315	0.0595112	0.783804	196.012	Bd1-1vsBd3-1	CG
Bd1	13671167	13671418	252	25	0.843859	0.0971236	0.746736	195.799	Bd1-1vsBd3-1	CG
Bd1	30788144	30788243	100	22	0.825891	0.0812635	0.744628	195.59	Bd1-1vsBd3-1	CG
Bd1	20642325	20642581	257	13	0.0469831	0.924446	-0.877463	-195.221	Bd1-1vsBd3-1	CG
Bd1	51528121	51528394	274	29	0.850473	0.0810439	0.769429	195.182	Bd1-1vsBd3-1	CG
Bd1	28690369	28690502	134	16	0.0497624	0.910295	-0.860532	-195.01	Bd1-1vsBd3-1	CG
Bd1	14876062	14876326	265	27	0.887333	0.0699347	0.817398	194.984	Bd1-1vsBd3-1	CG
Bd1	24039723	24039869	147	24	0.964097	0.088739	0.875358	194.975	Bd1-1vsBd3-1	CG
Bd1	49773293	49773647	355	31	0.0852245	0.840689	-0.755464	-194.716	Bd1-1vsBd3-1	CG
Bd1	24214886	24215166	281	25	0.862179	0.0995412	0.762638	194.52	Bd1-1vsBd3-1	CG
Bd1	11267827	11268082	256	14	0.0841331	0.967516	-0.883383	-194.462	Bd1-1vsBd3-1	CG
Bd1	10924198	10924448	251	23	0.955407	0.183509	0.771898	194.14	Bd1-1vsBd3-1	CG
Bd1	40627561	40627830	270	31	0.913212	0.111229	0.801983	193.784	Bd1-1vsBd3-1	CG
Bd1	28366798	28367059	262	22	0.87749	0.0577812	0.819709	193.765	Bd1-1vsBd3-1	CG
Bd1	44967108	44967250	143	27	0.175318	0.923155	-0.747837	-193.753	Bd1-1vsBd3-1	CG
Bd1	34662700	34663060	361	18	0.934041	0.204067	0.729974	193.588	Bd1-1vsBd3-1	CG
Bd1	50640925	50641254	330	24	0.0719643	0.845278	-0.773314	-193.207	Bd1-1vsBd3-1	CG
Bd1	58396128	58396287	160	26	0.855318	0.0800204	0.775298	193.167	Bd1-1vsBd3-1	CG
Bd1	72929078	72929305	228	18	0.928201	0.0983012	0.8299	193.049	Bd1-1vsBd3-1	CG
Bd1	25280389	25280609	221	40	0.234719	0.706464	-0.471745	-192.83	Bd1-1vsBd3-1	CG
Bd1	58754503	58754637	135	24	0.906121	0.0651187	0.841002	192.66	Bd1-1vsBd3-1	CG
Bd1	39629731	39629967	237	25	0.110128	0.897609	-0.787481	-192.632	Bd1-1vsBd3-1	CG
Bd1	41996057	41996365	309	23	0.952219	0.101794	0.850425	192.483	Bd1-1vsBd3-1	CG
Bd1	58390951	58391168	218	31	0.89534	0.140625	0.754715	192.481	Bd1-1vsBd3-1	CG
Bd1	18325286	18325507	222	26	0.796769	0.181702	0.615067	192.221	Bd1-1vsBd3-1	CG
Bd1	31209402	31209669	268	23	0.942503	0.0899926	0.85251	192.144	Bd1-1vsBd3-1	CG
Bd1	21336144	21336253	110	18	0.776591	0.0435245	0.733067	191.985	Bd1-1vsBd3-1	CG
Bd1	21861815	21861936	122	26	0.847493	0.0741485	0.773345	191.961	Bd1-1vsBd3-1	CG
Bd1	20533370	20533771	402	30	0.727959	0.0880701	0.639889	191.902	Bd1-1vsBd3-1	CG
Bd1	31322574	31322628	55	15	0.910963	0.0408166	0.870147	191.883	Bd1-1vsBd3-1	CG
Bd1	21210824	21210970	147	19	0.0438154	0.867889	-0.824074	-191.807	Bd1-1vsBd3-1	CG
Bd1	61675803	61676026	224	27	0.0449455	0.7842	-0.739254	-191.505	Bd1-1vsBd3-1	CG
Bd1	22012561	22012908	348	39	0.137928	0.749998	-0.61207	-191.23	Bd1-1vsBd3-1	CG
Bd1	13790131	13790300	170	23	0.0420501	0.695392	-0.653342	-190.911	Bd1-1vsBd3-1	CG
Bd1	74556506	74556600	95	13	0.052606	0.847946	-0.79534	-190.878	Bd1-1vsBd3-1	CG
Bd1	4128674	4128871	198	26	0.729981	0.0612819	0.668699	190.7	Bd1-1vsBd3-1	CG
Bd1	41946720	41946869	150	24	0.794142	0.0645579	0.729584	190.277	Bd1-1vsBd3-1	CG
Bd1	68333577	68333654	78	12	0.953885	0.0328395	0.921046	190.253	Bd1-1vsBd3-1	CG
Bd1	53308413	53309078	666	18	0.934439	0.0756109	0.858829	190.083	Bd1-1vsBd3-1	CG
Bd1	43069215	43069907	693	16	0.0757161	0.947439	-0.871723	-190.074	Bd1-1vsBd3-1	CG
Bd1	1014102	1014416	315	21	0.0738863	0.935037	-0.861151	-189.671	Bd1-1vsBd3-1	CG
Bd1	1053495	1053730	236	32	0.102558	0.79579	-0.693232	-189.61	Bd1-1vsBd3-1	CG
Bd1	46905934	46906168	235	15	0.898824	0.0519982	0.846826	189.585	Bd1-1vsBd3-1	CG
Bd1	2585675	2585864	190	12	0.893769	0.0701474	0.823621	189.391	Bd1-1vsBd3-1	CG
Bd1	39306605	39307015	411	17	0.0840883	0.889516	-0.805428	-189.387	Bd1-1vsBd3-1	CG
Bd1	6285784	6286085	302	23	0.109458	0.909043	-0.799584	-189.346	Bd1-1vsBd3-1	CG
Bd1	74209929	74210048	120	13	0.910222	0.0606471	0.849575	189.224	Bd1-1vsBd3-1	CG
Bd1	11130617	11130891	275	25	0.801234	0.0530158	0.748218	189.177	Bd1-1vsBd3-1	CG
Bd1	43265826	43265938	113	32	0.90566	0.071092	0.834568	188.953	Bd1-1vsBd3-1	CG
Bd1	13340087	13340349	263	26	0.87617	0.0894378	0.786732	188.907	Bd1-1vsBd3-1	CG
Bd1	50931935	50932230	296	15	0.941928	0.0780841	0.863844	188.87	Bd1-1vsBd3-1	CG
Bd1	68388417	68388619	203	23	0.826168	0.0809752	0.745193	188.753	Bd1-1vsBd3-1	CG
Bd1	19087363	19087570	208	38	0.566763	0.0435526	0.52321	188.415	Bd1-1vsBd3-1	CG
Bd1	31008676	31008872	197	20	0.10982	0.892865	-0.783046	-188.275	Bd1-1vsBd3-1	CG
Bd1	51376677	51377081	405	24	0.850669	0.0477038	0.802965	188.021	Bd1-1vsBd3-1	CG
Bd1	26770388	26770587	200	25	0.887426	0.0705558	0.81687	187.917	Bd1-1vsBd3-1	CG
Bd1	11320750	11320947	198	24	0.891871	0.139667	0.752204	187.89	Bd1-1vsBd3-1	CG
Bd1	67670492	67670662	171	13	0.0411023	0.868798	-0.827696	-187.799	Bd1-1vsBd3-1	CG
Bd1	32826946	32827114	169	23	0.842878	0.0823223	0.760556	187.615	Bd1-1vsBd3-1	CG
Bd1	48229353	48229496	144	32	0.0258032	0.515614	-0.48981	-187.136	Bd1-1vsBd3-1	CG
Bd1	34144326	34144708	383	16	0.950141	0.098852	0.851289	187.102	Bd1-1vsBd3-1	CG
Bd1	23415813	23415962	150	12	0.945572	0.0397841	0.905788	187.004	Bd1-1vsBd3-1	CG
Bd1	15685835	15686036	202	22	0.0653187	0.810689	-0.74537	-186.999	Bd1-1vsBd3-1	CG
Bd1	60134727	60134875	149	18	0.886886	0.113835	0.77305	186.744	Bd1-1vsBd3-1	CG
Bd1	29898809	29899007	199	11	0.0362862	0.933403	-0.897116	-186.452	Bd1-1vsBd3-1	CG
Bd1	67426731	67426995	265	12	0.895057	0.0203452	0.874711	186.366	Bd1-1vsBd3-1	CG
Bd1	46079256	46079963	708	28	0.891801	0.0953137	0.796488	186.311	Bd1-1vsBd3-1	CG
Bd1	60977159	60977681	523	25	0.944938	0.116801	0.828137	186.231	Bd1-1vsBd3-1	CG
Bd1	52318098	52318235	138	38	0.0535465	0.579156	-0.525609	-186.031	Bd1-1vsBd3-1	CG
Bd1	51601665	51601768	104	21	0.852724	0.0306034	0.822121	185.879	Bd1-1vsBd3-1	CG
Bd1	53784428	53784814	387	26	0.956643	0.105223	0.851419	185.544	Bd1-1vsBd3-1	CG
Bd1	57558951	57559148	198	47	0.0497505	0.538946	-0.489195	-185.494	Bd1-1vsBd3-1	CG
Bd1	28856372	28856783	412	31	0.868623	0.0889658	0.779657	185.473	Bd1-1vsBd3-1	CG
Bd1	19394957	19395037	81	14	0.0395187	0.916647	-0.877128	-185.299	Bd1-1vsBd3-1	CG
Bd1	53681185	53681379	195	19	0.205901	0.92003	-0.714129	-185.133	Bd1-1vsBd3-1	CG
Bd1	46344373	46344639	267	49	0.0245082	0.372335	-0.347827	-184.991	Bd1-1vsBd3-1	CG
Bd1	2806252	2806992	741	30	0.122247	0.898797	-0.77655	-183.644	Bd1-1vsBd3-1	CG
Bd1	23205107	23205363	257	30	0.764393	0.0690382	0.695355	183.559	Bd1-1vsBd3-1	CG
Bd1	27889546	27889924	379	26	0.788338	0.0514173	0.736921	183.407	Bd1-1vsBd3-1	CG
Bd1	33478460	33478845	386	33	0.25946	0.929247	-0.669787	-183.369	Bd1-1vsBd3-1	CG
Bd1	2241871	2241956	86	18	0.0494547	0.779813	-0.730359	-183.331	Bd1-1vsBd3-1	CG
Bd1	53614523	53614811	289	15	0.0334331	0.888284	-0.854851	-183.035	Bd1-1vsBd3-1	CG
Bd1	34024794	34025260	467	25	0.944153	0.25187	0.692283	182.872	Bd1-1vsBd3-1	CG
Bd1	59479526	59479729	204	16	0.8975	0.0564526	0.841047	182.819	Bd1-1vsBd3-1	CG
Bd1	35045850	35046015	166	32	0.558537	0.0723797	0.486158	182.505	Bd1-1vsBd3-1	CG
Bd1	65213125	65213199	75	15	0.875043	0.0921387	0.782905	182.474	Bd1-1vsBd3-1	CG
Bd1	63549452	63549634	183	14	0.943555	0.055728	0.887827	182.453	Bd1-1vsBd3-1	CG
Bd1	25103603	25103827	225	23	0.819016	0.0652821	0.753734	182.443	Bd1-1vsBd3-1	CG
Bd1	74700668	74701101	434	40	0.597293	0.0659017	0.531392	182.066	Bd1-1vsBd3-1	CG
Bd1	236150	236650	501	16	0.912703	0.0633451	0.849358	181.982	Bd1-1vsBd3-1	CG
Bd1	24571579	24571700	122	17	0.0288216	0.933036	-0.904214	-181.981	Bd1-1vsBd3-1	CG
Bd1	56509407	56509745	339	27	0.891898	0.195961	0.695936	181.742	Bd1-1vsBd3-1	CG
Bd1	27963111	27963338	228	26	0.309843	0.943165	-0.633322	-181.684	Bd1-1vsBd3-1	CG
Bd1	26140742	26141073	332	33	0.631603	0.0449966	0.586606	181.576	Bd1-1vsBd3-1	CG
Bd1	2474221	2474486	266	24	0.887368	0.0778689	0.809499	181.561	Bd1-1vsBd3-1	CG
Bd1	62436922	62437079	158	20	0.0721304	0.915702	-0.843572	-181.532	Bd1-1vsBd3-1	CG
Bd1	17714973	17715181	209	39	0.0247585	0.543881	-0.519122	-181.467	Bd1-1vsBd3-1	CG
Bd1	2202776	2202846	71	18	0.0525948	0.916723	-0.864128	-181.381	Bd1-1vsBd3-1	CG
Bd1	63623976	63624497	522	18	0.060617	0.907087	-0.84647	-181.115	Bd1-1vsBd3-1	CG
Bd1	4663077	4663283	207	21	0.0761972	0.858611	-0.782413	-181.098	Bd1-1vsBd3-1	CG
Bd1	54764743	54765235	493	29	0.82563	0.0635827	0.762047	181.005	Bd1-1vsBd3-1	CG
Bd1	5704855	5705115	261	27	0.937138	0.144111	0.793027	180.661	Bd1-1vsBd3-1	CG
Bd1	19807619	19807756	138	19	0.862015	0.059252	0.802763	180.613	Bd1-1vsBd3-1	CG
Bd1	23707473	23707574	102	16	0.875311	0.093256	0.782055	180.383	Bd1-1vsBd3-1	CG
Bd1	33131440	33131717	278	23	0.784126	0.0717179	0.712408	180.331	Bd1-1vsBd3-1	CG
Bd1	48657170	48657455	286	34	0.8339	0.103368	0.730532	180.291	Bd1-1vsBd3-1	CG
Bd1	48384552	48384639	88	25	0.030961	0.712607	-0.681646	-179.854	Bd1-1vsBd3-1	CG
Bd1	23470249	23470470	222	16	0.953442	0.115955	0.837488	179.772	Bd1-1vsBd3-1	CG
Bd1	2473814	2474161	348	17	0.87016	0.0565179	0.813642	179.668	Bd1-1vsBd3-1	CG
Bd1	17730503	17730667	165	20	0.0239799	0.774096	-0.750116	-179.599	Bd1-1vsBd3-1	CG
Bd1	71346223	71346436	214	22	0.114861	0.905926	-0.791065	-179.466	Bd1-1vsBd3-1	CG
Bd1	34388898	34389126	229	34	0.798208	0.226716	0.571491	179.36	Bd1-1vsBd3-1	CG
Bd1	12778546	12778841	296	26	0.0673355	0.77793	-0.710595	-179.238	Bd1-1vsBd3-1	CG
Bd1	2474548	2474692	145	15	0.863424	0.0315596	0.831864	178.869	Bd1-1vsBd3-1	CG
Bd1	57828741	57828818	78	14	0.883145	0.0461185	0.837026	178.845	Bd1-1vsBd3-1	CG
Bd1	49943925	49944181	257	33	0.835291	0.109829	0.725462	178.507	Bd1-1vsBd3-1	CG
Bd1	33590115	33590377	263	19	0.883615	0.0378761	0.845739	178.322	Bd1-1vsBd3-1	CG
Bd1	55539415	55539724	310	23	0.0734197	0.851107	-0.777687	-178.005	Bd1-1vsBd3-1	CG
Bd1	33001028	33001183	156	20	0.0792178	0.864904	-0.785686	-177.528	Bd1-1vsBd3-1	CG
Bd1	139137	139197	61	14	0.830634	0.0518194	0.778815	177.359	Bd1-1vsBd3-1	CG
Bd1	44400540	44400651	112	17	0.11167	0.914961	-0.803291	-177.323	Bd1-1vsBd3-1	CG
Bd1	28592218	28592476	259	33	0.951179	0.125343	0.825836	177.313	Bd1-1vsBd3-1	CG
Bd1	2202152	2202362	211	14	0.0747071	0.965742	-0.891035	-177.283	Bd1-1vsBd3-1	CG
Bd1	24214635	24214819	185	19	0.796185	0.0950211	0.701163	177.237	Bd1-1vsBd3-1	CG
Bd1	32582878	32583217	340	20	0.947875	0.0784465	0.869428	177.004	Bd1-1vsBd3-1	CG
Bd1	54856216	54856467	252	36	0.294084	0.82875	-0.534666	-176.62	Bd1-1vsBd3-1	CG
Bd1	32212112	32212371	260	28	0.879516	0.348207	0.531309	176.371	Bd1-1vsBd3-1	CG
Bd1	3029913	3030662	750	18	0.912385	0.087035	0.82535	176.228	Bd1-1vsBd3-1	CG
Bd1	7222395	7222752	358	50	0.811178	0.335659	0.475519	176.122	Bd1-1vsBd3-1	CG
Bd1	74393710	74394138	429	28	0.0454194	0.74797	-0.70255	-176.098	Bd1-1vsBd3-1	CG
Bd1	23973612	23973991	380	24	0.921827	0.0980402	0.823787	175.993	Bd1-1vsBd3-1	CG
Bd1	53412276	53412671	396	16	0.0576525	0.915339	-0.857687	-175.964	Bd1-1vsBd3-1	CG
Bd1	58249600	58249754	155	20	0.890609	0.0529121	0.837697	175.905	Bd1-1vsBd3-1	CG
Bd1	42587387	42587616	230	16	0.94562	0.0514396	0.894181	175.792	Bd1-1vsBd3-1	CG
Bd1	49922010	49922152	143	31	0.87346	0.0776872	0.795773	175.755	Bd1-1vsBd3-1	CG
Bd1	35026627	35026857	231	33	0.297022	0.820575	-0.523553	-175.704	Bd1-1vsBd3-1	CG
Bd1	55430772	55431008	237	21	0.170137	0.950377	-0.78024	-175.443	Bd1-1vsBd3-1	CG
Bd1	33053986	33054185	200	12	0.925833	0.0320114	0.893822	175.214	Bd1-1vsBd3-1	CG
Bd1	26358807	26358940	134	25	0.0826704	0.782137	-0.699467	-175.195	Bd1-1vsBd3-1	CG
Bd1	26855991	26856133	143	20	0.0347485	0.847903	-0.813155	-174.61	Bd1-1vsBd3-1	CG
Bd1	13774757	13776283	1527	20	0.050623	0.909752	-0.859129	-174.523	Bd1-1vsBd3-1	CG
Bd1	58160601	58160744	144	18	0.0554161	0.901876	-0.84646	-174.511	Bd1-1vsBd3-1	CG
Bd1	6534611	6534820	210	31	0.0945263	0.881457	-0.78693	-174.387	Bd1-1vsBd3-1	CG
Bd1	38312829	38312943	115	22	0.701906	0.0448421	0.657064	174.378	Bd1-1vsBd3-1	CG
Bd1	47281355	47281508	154	14	0.903296	0.104014	0.799282	174.315	Bd1-1vsBd3-1	CG
Bd1	61789039	61789212	174	32	0.147655	0.811548	-0.663892	-174.295	Bd1-1vsBd3-1	CG
Bd1	18827823	18828127	305	19	0.938188	0.11761	0.820577	173.618	Bd1-1vsBd3-1	CG
Bd1	67747343	67747425	83	18	0.0846506	0.914214	-0.829564	-173.513	Bd1-1vsBd3-1	CG
Bd1	58257240	58257760	521	26	0.94977	0.147597	0.802173	173.388	Bd1-1vsBd3-1	CG
Bd1	30923885	30923997	113	20	0.10486	0.854829	-0.749969	-173.346	Bd1-1vsBd3-1	CG
Bd1	29841520	29841664	145	22	0.248334	0.923805	-0.675471	-173.196	Bd1-1vsBd3-1	CG
Bd1	50165448	50165643	196	20	0.0815483	0.935717	-0.854169	-173.193	Bd1-1vsBd3-1	CG
Bd1	54765510	54765798	289	24	0.172976	0.938197	-0.765221	-173.151	Bd1-1vsBd3-1	CG
Bd1	41572950	41573161	212	11	0.943063	0.120997	0.822066	173.092	Bd1-1vsBd3-1	CG
Bd1	47027358	47027626	269	18	0.933322	0.0888762	0.844446	173.084	Bd1-1vsBd3-1	CG
Bd1	5161200	5161739	540	15	0.823809	0.0603108	0.763499	172.949	Bd1-1vsBd3-1	CG
Bd1	71584038	71584107	70	11	0.0305305	0.936614	-0.906084	-172.94	Bd1-1vsBd3-1	CG
Bd1	47928783	47928908	126	14	0.0537198	0.934146	-0.880426	-172.672	Bd1-1vsBd3-1	CG
Bd1	46109195	46109439	245	25	0.906005	0.100319	0.805686	172.643	Bd1-1vsBd3-1	CG
Bd1	21024101	21024382	282	22	0.884626	0.101459	0.783168	172.525	Bd1-1vsBd3-1	CG
Bd1	1642640	1642858	219	19	0.914737	0.0792655	0.835471	172.467	Bd1-1vsBd3-1	CG
Bd1	4967662	4968022	361	37	0.421468	0.902492	-0.481024	-172.341	Bd1-1vsBd3-1	CG
Bd1	48677688	48677792	105	16	0.891253	0.0387228	0.85253	172.271	Bd1-1vsBd3-1	CG
Bd1	12129071	12129178	108	15	0.136436	0.970952	-0.834516	-172.253	Bd1-1vsBd3-1	CG
Bd1	57681839	57682079	241	26	0.122922	0.862253	-0.739331	-171.915	Bd1-1vsBd3-1	CG
Bd1	21970418	21970591	174	18	0.949804	0.101486	0.848317	171.742	Bd1-1vsBd3-1	CG
Bd1	9392	9482	91	22	0.980717	0.18409	0.796627	171.47	Bd1-1vsBd3-1	CG
Bd1	13506898	13507005	108	17	0.0592619	0.892923	-0.833661	-171.416	Bd1-1vsBd3-1	CG
Bd1	13532100	13532313	214	33	0.122307	0.879191	-0.756884	-171.235	Bd1-1vsBd3-1	CG
Bd1	9427921	9428201	281	16	0.884148	0.0447984	0.83935	171.231	Bd1-1vsBd3-1	CG
Bd1	23640024	23640142	119	14	0.943166	0.0587336	0.884433	171.222	Bd1-1vsBd3-1	CG
Bd1	48206077	48206271	195	25	0.0961366	0.873284	-0.777147	-170.993	Bd1-1vsBd3-1	CG
Bd1	38731689	38731872	184	22	0.862026	0.0864987	0.775528	170.918	Bd1-1vsBd3-1	CG
Bd1	23368638	23368869	232	14	0.951608	0.0682666	0.883341	170.802	Bd1-1vsBd3-1	CG
Bd1	39545816	39546159	344	21	0.919878	0.125972	0.793906	170.746	Bd1-1vsBd3-1	CG
Bd1	46026339	46026518	180	25	0.83851	0.104719	0.733791	170.704	Bd1-1vsBd3-1	CG
Bd1	70266642	70266863	222	20	0.942879	0.0709038	0.871975	170.469	Bd1-1vsBd3-1	CG
Bd1	28992823	28992998	176	18	0.955627	0.106703	0.848924	170.278	Bd1-1vsBd3-1	CG
Bd1	54319064	54319245	182	22	0.852179	0.0677214	0.784457	170.109	Bd1-1vsBd3-1	CG
Bd1	53187060	53187185	126	19	0.798309	0.049546	0.748763	170.059	Bd1-1vsBd3-1	CG
Bd1	5173038	5173192	155	11	0.0363068	0.889227	-0.85292	-170.03	Bd1-1vsBd3-1	CG
Bd1	4780771	4780928	158	11	0.0950411	0.964336	-0.869295	-169.69	Bd1-1vsBd3-1	CG
Bd1	15114994	15115118	125	12	0.0580671	0.952029	-0.893962	-169.607	Bd1-1vsBd3-1	CG
Bd1	47289109	47289293	185	27	0.951475	0.152658	0.798817	169.55	Bd1-1vsBd3-1	CG
Bd1	49388766	49389039	274	22	0.0661543	0.846227	-0.780072	-168.422	Bd1-1vsBd3-1	CG
Bd1	19966384	19966649	266	21	0.874624	0.0828088	0.791815	168.401	Bd1-1vsBd3-1	CG
Bd1	56025395	56025794	400	24	0.0980907	0.86758	-0.769489	-168.389	Bd1-1vsBd3-1	CG
Bd1	4521895	4522227	333	33	0.277511	0.873371	-0.59586	-168.335	Bd1-1vsBd3-1	CG
Bd1	52647842	52648123	282	16	0.140389	0.941086	-0.800697	-168.212	Bd1-1vsBd3-1	CG
Bd1	32660244	32660333	90	21	0.724272	0.037684	0.686588	167.76	Bd1-1vsBd3-1	CG
Bd1	26210970	26211257	288	24	0.0535903	0.757266	-0.703675	-167.688	Bd1-1vsBd3-1	CG
Bd1	16004766	16004947	182	30	0.21699	0.811048	-0.594059	-167.679	Bd1-1vsBd3-1	CG
Bd1	8976379	8976540	162	16	0.0381338	0.903088	-0.864954	-167.626	Bd1-1vsBd3-1	CG
Bd1	4825412	4825616	205	34	0.843493	0.164859	0.678634	167.568	Bd1-1vsBd3-1	CG
Bd1	2345502	2345616	115	21	0.110011	0.922113	-0.812102	-167.492	Bd1-1vsBd3-1	CG
Bd1	53784865	53784915	51	9	0.963643	0.0922228	0.871421	167.123	Bd1-1vsBd3-1	CG
Bd1	14547128	14547326	199	41	0.0353774	0.499346	-0.463969	-166.997	Bd1-1vsBd3-1	CG
Bd1	4495893	4495964	72	15	0.0561887	0.879646	-0.823458	-166.909	Bd1-1vsBd3-1	CG
Bd1	38371556	38371868	313	23	0.120349	0.902853	-0.782504	-166.825	Bd1-1vsBd3-1	CG
Bd1	24808926	24809097	172	39	0.29085	0.705952	-0.415101	-166.815	Bd1-1vsBd3-1	CG
Bd1	4501238	4501345	108	11	0.0425219	0.962088	-0.919566	-166.799	Bd1-1vsBd3-1	CG
Bd1	25670855	25671035	181	28	0.711042	0.0613746	0.649667	166.68	Bd1-1vsBd3-1	CG
Bd1	8553008	8553283	276	21	0.842537	0.0664469	0.77609	166.652	Bd1-1vsBd3-1	CG
Bd1	41811033	41811262	230	15	0.898769	0.087682	0.811087	166.63	Bd1-1vsBd3-1	CG
Bd1	27464422	27464573	152	18	0.90054	0.222124	0.678416	166.576	Bd1-1vsBd3-1	CG
Bd1	45459701	45459891	191	18	0.899131	0.232585	0.666546	166.318	Bd1-1vsBd3-1	CG
Bd1	58099894	58100099	206	47	0.660382	0.0477759	0.612606	166.127	Bd1-1vsBd3-1	CG
Bd1	25801473	25801575	103	20	0.0924407	0.964758	-0.872317	-165.969	Bd1-1vsBd3-1	CG
Bd1	10246617	10246984	368	23	0.845254	0.0666233	0.778631	165.879	Bd1-1vsBd3-1	CG
Bd1	46440653	46440922	270	32	0.801343	0.237545	0.563797	165.529	Bd1-1vsBd3-1	CG
Bd1	4128391	4128499	109	22	0.791382	0.0412971	0.750085	165.501	Bd1-1vsBd3-1	CG
Bd1	27647540	27647635	96	16	0.0411713	0.802355	-0.761184	-165.481	Bd1-1vsBd3-1	CG
Bd1	51126795	51127090	296	23	0.935601	0.0847999	0.850801	165.287	Bd1-1vsBd3-1	CG
Bd1	31613467	31613780	314	17	0.860571	0.090724	0.769847	164.894	Bd1-1vsBd3-1	CG
Bd1	70650719	70650795	77	13	0.103595	0.865585	-0.76199	-164.823	Bd1-1vsBd3-1	CG
Bd1	12477461	12477606	146	24	0.778225	0.107986	0.670239	164.786	Bd1-1vsBd3-1	CG
Bd1	9466041	9466185	145	18	0.929947	0.109432	0.820516	164.636	Bd1-1vsBd3-1	CG
Bd1	69076486	69076751	266	19	0.0788549	0.903045	-0.82419	-164.556	Bd1-1vsBd3-1	CG
Bd1	21658717	21658933	217	20	0.798943	0.0570088	0.741935	164.465	Bd1-1vsBd3-1	CG
Bd1	24974778	24974909	132	16	0.788871	0.0400506	0.74882	164.251	Bd1-1vsBd3-1	CG
Bd1	43429404	43429518	115	24	0.625094	0.0335101	0.591584	163.998	Bd1-1vsBd3-1	CG
Bd1	25373240	25373305	66	14	0.866149	0.0395273	0.826622	163.87	Bd1-1vsBd3-1	CG
Bd1	70584077	70584262	186	18	0.821882	0.061708	0.760174	163.722	Bd1-1vsBd3-1	CG
Bd1	12451002	12451193	192	18	0.869481	0.189808	0.679673	163.46	Bd1-1vsBd3-1	CG
Bd1	60142974	60143105	132	12	0.088402	0.968856	-0.880454	-163.279	Bd1-1vsBd3-1	CG
Bd1	12890727	12890789	63	12	0.916446	0.0717576	0.844688	163.082	Bd1-1vsBd3-1	CG
Bd1	34283524	34283895	372	15	0.906413	0.0621095	0.844303	162.9	Bd1-1vsBd3-1	CG
Bd1	5752453	5752633	181	28	0.804558	0.106426	0.698132	162.877	Bd1-1vsBd3-1	CG
Bd1	40280333	40280781	449	27	0.109712	0.905775	-0.796063	-162.815	Bd1-1vsBd3-1	CG
Bd1	72503024	72503215	192	26	0.65266	0.0405824	0.612077	162.671	Bd1-1vsBd3-1	CG
Bd1	20025600	20025807	208	13	0.971396	0.225865	0.74553	162.629	Bd1-1vsBd3-1	CG
Bd1	39412085	39412277	193	13	0.156269	0.938886	-0.782618	-162.604	Bd1-1vsBd3-1	CG
Bd1	42714926	42715081	156	20	0.848274	0.111041	0.737233	162.551	Bd1-1vsBd3-1	CG
Bd1	27903322	27903674	353	26	0.801114	0.190771	0.610343	162.408	Bd1-1vsBd3-1	CG
Bd1	32531335	32531630	296	25	0.647679	0.053615	0.594064	162.192	Bd1-1vsBd3-1	CG
Bd1	68386192	68386559	368	16	0.899044	0.0510333	0.848011	162.188	Bd1-1vsBd3-1	CG
Bd1	57815852	57815955	104	16	0.727984	0.0353493	0.692635	162.147	Bd1-1vsBd3-1	CG
Bd1	57172610	57172782	173	17	0.0217465	0.799812	-0.778066	-161.907	Bd1-1vsBd3-1	CG
Bd1	60929006	60929090	85	22	0.394988	0.873934	-0.478946	-161.858	Bd1-1vsBd3-1	CG
Bd1	24880891	24880993	103	16	0.820415	0.0310859	0.789329	161.816	Bd1-1vsBd3-1	CG
Bd1	42938812	42938954	143	20	0.860014	0.0536998	0.806314	161.682	Bd1-1vsBd3-1	CG
Bd1	56228182	56228468	287	19	0.0735915	0.913055	-0.839463	-161.391	Bd1-1vsBd3-1	CG
Bd1	43825748	43825995	248	16	0.898933	0.0484975	0.850436	161.316	Bd1-1vsBd3-1	CG
Bd1	53145558	53145853	296	22	0.904836	0.135438	0.769398	161.262	Bd1-1vsBd3-1	CG
Bd1	68287147	68287210	64	18	0.81799	0.0501894	0.767801	161.194	Bd1-1vsBd3-1	CG
Bd1	57490208	57490302	95	20	0.0596139	0.788881	-0.729267	-161.098	Bd1-1vsBd3-1	CG
Bd1	1094537	1094762	226	20	0.801367	0.0410321	0.760335	160.98	Bd1-1vsBd3-1	CG
Bd1	2575192	2575400	209	17	0.818134	0.051015	0.767119	160.835	Bd1-1vsBd3-1	CG
Bd1	32944974	32945239	266	14	0.0995107	0.935004	-0.835493	-160.805	Bd1-1vsBd3-1	CG
Bd1	61434436	61434565	130	14	0.0600415	0.962273	-0.902231	-160.765	Bd1-1vsBd3-1	CG
Bd1	57480346	57480478	133	20	0.021975	0.726884	-0.704909	-160.735	Bd1-1vsBd3-1	CG
Bd1	21862167	21862364	198	30	0.895936	0.0892839	0.806652	160.642	Bd1-1vsBd3-1	CG
Bd1	14654560	14654803	244	25	0.293991	0.882278	-0.588287	-160.612	Bd1-1vsBd3-1	CG
Bd1	18956509	18956641	133	24	0.846463	0.0629615	0.783501	160.443	Bd1-1vsBd3-1	CG
Bd1	58835958	58836127	170	18	0.270724	0.966396	-0.695672	-160.328	Bd1-1vsBd3-1	CG
Bd1	28657055	28657244	190	19	0.0405294	0.842118	-0.801588	-160.325	Bd1-1vsBd3-1	CG
Bd1	19096397	19096649	253	28	0.820091	0.10034	0.719751	160.256	Bd1-1vsBd3-1	CG
Bd1	31638151	31638292	142	15	0.0838007	0.948422	-0.864622	-160.052	Bd1-1vsBd3-1	CG
Bd1	4720064	4720139	76	12	0.9517	0.146752	0.804948	160.028	Bd1-1vsBd3-1	CG
Bd1	4825270	4825331	62	24	0.919182	0.0909564	0.828226	159.945	Bd1-1vsBd3-1	CG
Bd1	61733897	61734133	237	27	0.889167	0.111735	0.777432	159.939	Bd1-1vsBd3-1	CG
Bd1	27347547	27347975	429	11	0.9715	0.0784664	0.893034	159.899	Bd1-1vsBd3-1	CG
Bd1	48478319	48478651	333	39	0.697105	0.0981201	0.598985	159.801	Bd1-1vsBd3-1	CG
Bd1	13170939	13171159	221	23	0.267508	0.952282	-0.684774	-159.732	Bd1-1vsBd3-1	CG
Bd1	61175971	61176161	191	14	0.886152	0.0583431	0.827809	159.707	Bd1-1vsBd3-1	CG
Bd1	68700373	68700701	329	20	0.848675	0.0691242	0.779551	159.618	Bd1-1vsBd3-1	CG
Bd1	9804184	9804236	53	12	0.0366257	0.828866	-0.79224	-159.582	Bd1-1vsBd3-1	CG
Bd1	63029411	63029578	168	15	0.955327	0.0845886	0.870738	159.519	Bd1-1vsBd3-1	CG
Bd1	70714996	70715119	124	22	0.0692525	0.79306	-0.723808	-159.478	Bd1-1vsBd3-1	CG
Bd1	60227928	60228395	468	14	0.883001	0.140941	0.74206	159.466	Bd1-1vsBd3-1	CG
Bd1	72290269	72290401	133	12	0.881627	0.0534831	0.828144	159.367	Bd1-1vsBd3-1	CG
Bd1	21641672	21641861	190	17	0.375438	0.921501	-0.546062	-159.158	Bd1-1vsBd3-1	CG
Bd1	52619116	52619276	161	20	0.866362	0.0714574	0.794904	158.883	Bd1-1vsBd3-1	CG
Bd1	35445229	35445372	144	13	0.95247	0.0972653	0.855204	158.77	Bd1-1vsBd3-1	CG
Bd1	58250007	58250100	94	16	0.912995	0.0689395	0.844055	158.579	Bd1-1vsBd3-1	CG
Bd1	34291053	34291142	90	11	0.948205	0.0515991	0.896606	158.503	Bd1-1vsBd3-1	CG
Bd1	34696537	34696746	210	19	0.907262	0.0467528	0.860509	158.429	Bd1-1vsBd3-1	CG
Bd1	27099638	27100125	488	22	0.142464	0.936817	-0.794353	-158.239	Bd1-1vsBd3-1	CG
Bd1	5417908	5418008	101	27	0.706659	0.0646886	0.64197	158.216	Bd1-1vsBd3-1	CG
Bd1	61007075	61007174	100	14	0.0839645	0.904733	-0.820768	-158.038	Bd1-1vsBd3-1	CG
Bd1	25501511	25501708	198	18	0.0855544	0.934534	-0.848979	-157.899	Bd1-1vsBd3-1	CG
Bd1	44821265	44821475	211	42	0.709064	0.183032	0.526032	157.793	Bd1-1vsBd3-1	CG
Bd1	48978384	48978576	193	22	0.804651	0.0872506	0.717401	157.759	Bd1-1vsBd3-1	CG
Bd1	50493896	50494117	222	19	0.909821	0.144553	0.765268	157.739	Bd1-1vsBd3-1	CG
Bd1	55673068	55673119	52	9	0.130593	0.955884	-0.825291	-157.713	Bd1-1vsBd3-1	CG
Bd1	20354168	20354310	143	15	0.959913	0.0784949	0.881418	157.702	Bd1-1vsBd3-1	CG
Bd1	71174507	71174594	88	13	0.0261644	0.846195	-0.820031	-157.692	Bd1-1vsBd3-1	CG
Bd1	39412337	39412429	93	14	0.0733936	0.942664	-0.86927	-157.644	Bd1-1vsBd3-1	CG
Bd1	18992968	18993274	307	47	0.056871	0.51443	-0.457559	-157.563	Bd1-1vsBd3-1	CG
Bd1	68435305	68435669	365	17	0.940664	0.0952014	0.845463	157.082	Bd1-1vsBd3-1	CG
Bd1	913624	913856	233	26	0.807009	0.0924552	0.714553	156.899	Bd1-1vsBd3-1	CG
Bd1	31431387	31431560	174	22	0.925376	0.112565	0.812812	156.756	Bd1-1vsBd3-1	CG
Bd1	70266915	70267077	163	15	0.932634	0.113372	0.819262	156.644	Bd1-1vsBd3-1	CG
Bd1	73932633	73932719	87	20	0.0795191	0.917605	-0.838085	-156.571	Bd1-1vsBd3-1	CG
Bd1	32875464	32875611	148	16	0.832919	0.173056	0.659862	156.456	Bd1-1vsBd3-1	CG
Bd1	4801632	4801830	199	22	0.0742634	0.669444	-0.595181	-156.366	Bd1-1vsBd3-1	CG
Bd1	41580015	41580117	103	18	0.212867	0.907832	-0.694965	-156.364	Bd1-1vsBd3-1	CG
Bd1	28314397	28314559	163	16	0.18755	0.934247	-0.746697	-156.311	Bd1-1vsBd3-1	CG
Bd1	52009947	52010009	63	16	0.211144	0.946817	-0.735672	-155.931	Bd1-1vsBd3-1	CG
Bd1	35004451	35004676	226	25	0.118961	0.802867	-0.683906	-155.407	Bd1-1vsBd3-1	CG
Bd1	9282385	9282741	357	20	0.882639	0.0878682	0.794771	155.35	Bd1-1vsBd3-1	CG
Bd1	49400117	49400356	240	19	0.877466	0.0823878	0.795078	155.272	Bd1-1vsBd3-1	CG
Bd1	13395483	13395578	96	21	0.753623	0.0879775	0.665645	155.054	Bd1-1vsBd3-1	CG
Bd1	25784212	25784318	107	16	0.813991	0.0388759	0.775115	155.031	Bd1-1vsBd3-1	CG
Bd1	41932575	41932662	88	20	0.869535	0.041177	0.828358	155.003	Bd1-1vsBd3-1	CG
Bd1	27887347	27887741	395	16	0.830746	0.0443522	0.786394	154.946	Bd1-1vsBd3-1	CG
Bd1	24243953	24244099	147	36	0.722472	0.107891	0.61458	154.93	Bd1-1vsBd3-1	CG
Bd1	70416381	70416557	177	13	0.945424	0.0866317	0.858792	154.92	Bd1-1vsBd3-1	CG
Bd1	67339119	67339304	186	18	0.819731	0.0478882	0.771843	154.895	Bd1-1vsBd3-1	CG
Bd1	24038657	24038894	238	19	0.939606	0.0772505	0.862356	154.89	Bd1-1vsBd3-1	CG
Bd1	12124486	12124670	185	16	0.893777	0.0772137	0.816563	154.816	Bd1-1vsBd3-1	CG
Bd1	2529176	2529332	157	20	0.773799	0.056873	0.716926	154.631	Bd1-1vsBd3-1	CG
Bd1	59337152	59337634	483	15	0.0623587	0.923913	-0.861555	-154.628	Bd1-1vsBd3-1	CG
Bd1	43303356	43303463	108	13	0.959696	0.138917	0.820779	154.561	Bd1-1vsBd3-1	CG
Bd1	22222896	22223144	249	17	0.761861	0.0459492	0.715912	154.529	Bd1-1vsBd3-1	CG
Bd1	19104159	19104291	133	16	0.812347	0.0372407	0.775106	154.527	Bd1-1vsBd3-1	CG
Bd1	72289995	72290143	149	23	0.962413	0.184705	0.777708	154.428	Bd1-1vsBd3-1	CG
Bd1	15062890	15063005	116	15	0.0349312	0.867778	-0.832847	-154.397	Bd1-1vsBd3-1	CG
Bd1	13744042	13744105	64	17	0.860245	0.0666622	0.793583	154.173	Bd1-1vsBd3-1	CG
Bd1	61860803	61861073	271	12	0.0332423	0.926218	-0.892976	-154.097	Bd1-1vsBd3-1	CG
Bd1	65364353	65364486	134	18	0.0361707	0.771849	-0.735678	-154.03	Bd1-1vsBd3-1	CG
Bd1	25061596	25062335	740	18	0.849107	0.0569374	0.792169	153.93	Bd1-1vsBd3-1	CG
Bd1	7955261	7955361	101	13	0.0552687	0.83772	-0.782451	-153.918	Bd1-1vsBd3-1	CG
Bd1	4720202	4720268	67	11	0.927496	0.10635	0.821145	153.863	Bd1-1vsBd3-1	CG
Bd1	19658541	19658947	407	19	0.104699	0.876923	-0.772224	-153.821	Bd1-1vsBd3-1	CG
Bd1	31435675	31435765	91	8	0.967907	0.0335892	0.934318	153.792	Bd1-1vsBd3-1	CG
Bd1	11587115	11587195	81	15	0.0646473	0.904936	-0.840289	-153.66	Bd1-1vsBd3-1	CG
Bd1	62553625	62553773	149	28	0.586501	0.0424806	0.54402	153.437	Bd1-1vsBd3-1	CG
Bd1	41602181	41602378	198	18	0.0529277	0.873771	-0.820844	-153.26	Bd1-1vsBd3-1	CG
Bd1	60238445	60238939	495	25	0.0543168	0.735806	-0.681489	-153.185	Bd1-1vsBd3-1	CG
Bd1	23588648	23588945	298	32	0.0854242	0.65336	-0.567936	-153.002	Bd1-1vsBd3-1	CG
Bd1	42367618	42367785	168	12	0.953831	0.129217	0.824614	152.976	Bd1-1vsBd3-1	CG
Bd1	47325310	47325382	73	16	0.0383736	0.840321	-0.801947	-152.759	Bd1-1vsBd3-1	CG
Bd1	53982048	53982151	104	23	0.888952	0.0993097	0.789643	152.681	Bd1-1vsBd3-1	CG
Bd1	28054338	28054498	161	17	0.744459	0.0626664	0.681792	152.535	Bd1-1vsBd3-1	CG
Bd1	4699958	4700153	196	14	0.962454	0.133666	0.828788	152.22	Bd1-1vsBd3-1	CG
Bd1	74665653	74665815	163	25	0.267472	0.932486	-0.665014	-151.742	Bd1-1vsBd3-1	CG
Bd1	28601276	28601448	173	13	0.0345889	0.924677	-0.890089	-151.623	Bd1-1vsBd3-1	CG
Bd1	8166768	8167101	334	13	0.947737	0.0843513	0.863385	151.612	Bd1-1vsBd3-1	CG
Bd1	41691106	41691375	270	21	0.910265	0.217797	0.692468	151.593	Bd1-1vsBd3-1	CG
Bd1	1402113	1402293	181	17	0.790687	0.0382201	0.752467	151.519	Bd1-1vsBd3-1	CG
Bd1	70855438	70855682	245	13	0.0655577	0.947581	-0.882024	-151.492	Bd1-1vsBd3-1	CG
Bd1	67387830	67388099	270	18	0.048147	0.830492	-0.782345	-151.38	Bd1-1vsBd3-1	CG
Bd1	55454957	55455204	248	32	0.752747	0.0876563	0.665091	151.269	Bd1-1vsBd3-1	CG
Bd1	51071254	51071401	148	20	0.0634238	0.887423	-0.824	-151.176	Bd1-1vsBd3-1	CG
Bd1	58649666	58649826	161	17	0.159	0.919068	-0.760068	-151.099	Bd1-1vsBd3-1	CG
Bd1	4809600	4809812	213	33	0.951976	0.19808	0.753896	151.087	Bd1-1vsBd3-1	CG
Bd1	59400492	59400712	221	20	0.873251	0.061371	0.81188	150.979	Bd1-1vsBd3-1	CG
Bd1	33511604	33511922	319	21	0.0626928	0.806555	-0.743862	-150.805	Bd1-1vsBd3-1	CG
Bd1	43387228	43387553	326	13	0.0672628	0.909108	-0.841845	-150.803	Bd1-1vsBd3-1	CG
Bd1	61282831	61282901	71	26	0.570883	0.043291	0.527592	150.776	Bd1-1vsBd3-1	CG
Bd1	11819728	11819820	93	21	0.797536	0.0555846	0.741952	150.629	Bd1-1vsBd3-1	CG
Bd1	46078418	46079072	655	14	0.954808	0.100193	0.854615	150.56	Bd1-1vsBd3-1	CG
Bd1	1359302	1359573	272	11	0.921473	0.033023	0.88845	150.552	Bd1-1vsBd3-1	CG
Bd1	61283673	61283921	249	29	0.512267	0.0507835	0.461483	150.537	Bd1-1vsBd3-1	CG
Bd1	51737038	51737244	207	13	0.883596	0.0502385	0.833358	150.525	Bd1-1vsBd3-1	CG
Bd1	70561639	70561972	334	21	0.829964	0.0775387	0.752426	150.489	Bd1-1vsBd3-1	CG
Bd1	966870	967018	149	18	0.171949	0.752497	-0.580548	-150.455	Bd1-1vsBd3-1	CG
Bd1	67426254	67426618	365	16	0.927171	0.11399	0.813181	150.356	Bd1-1vsBd3-1	CG
Bd1	51382629	51382984	356	23	0.222422	0.923568	-0.701145	-150.334	Bd1-1vsBd3-1	CG
Bd1	51818164	51818367	204	22	0.758056	0.0705084	0.687548	150.318	Bd1-1vsBd3-1	CG
Bd1	53494501	53494649	149	17	0.876182	0.0899433	0.786239	150.189	Bd1-1vsBd3-1	CG
Bd1	28597248	28597498	251	16	0.943318	0.0751033	0.868215	150.162	Bd1-1vsBd3-1	CG
Bd1	52408789	52408982	194	22	0.934214	0.0943108	0.839903	150.141	Bd1-1vsBd3-1	CG
Bd1	72166542	72166703	162	25	0.10424	0.79258	-0.68834	-149.996	Bd1-1vsBd3-1	CG
Bd1	10660961	10661097	137	15	0.210395	0.894779	-0.684383	-149.955	Bd1-1vsBd3-1	CG
Bd1	19166095	19166224	130	22	0.129798	0.921339	-0.791541	-149.932	Bd1-1vsBd3-1	CG
Bd1	19104904	19105078	175	27	0.739195	0.0759048	0.66329	149.855	Bd1-1vsBd3-1	CG
Bd1	56540424	56540638	215	15	0.0695096	0.941757	-0.872247	-149.845	Bd1-1vsBd3-1	CG
Bd1	23088532	23088645	114	14	0.0541533	0.898174	-0.84402	-149.75	Bd1-1vsBd3-1	CG
Bd1	55874313	55874546	234	15	0.0750204	0.926231	-0.851211	-149.719	Bd1-1vsBd3-1	CG
Bd1	68716740	68716950	211	16	0.0871832	0.859009	-0.771826	-149.633	Bd1-1vsBd3-1	CG
Bd1	27887916	27888276	361	18	0.881429	0.0528804	0.828548	149.553	Bd1-1vsBd3-1	CG
Bd1	58089409	58089492	84	14	0.0805649	0.89486	-0.814295	-149.388	Bd1-1vsBd3-1	CG
Bd1	22400311	22400458	148	16	0.0495218	0.879161	-0.829639	-149.364	Bd1-1vsBd3-1	CG
Bd1	72772851	72773015	165	17	0.0409405	0.75503	-0.71409	-149.284	Bd1-1vsBd3-1	CG
Bd1	7707638	7707829	192	29	0.848032	0.113645	0.734388	148.908	Bd1-1vsBd3-1	CG
Bd1	61734247	61734427	181	14	0.940388	0.0870557	0.853332	148.898	Bd1-1vsBd3-1	CG
Bd1	68447115	68447202	88	14	0.0404185	0.828935	-0.788517	-148.805	Bd1-1vsBd3-1	CG
Bd1	56107607	56108018	412	14	0.047488	0.87349	-0.826002	-148.565	Bd1-1vsBd3-1	CG
Bd1	13144275	13144453	179	20	0.919337	0.19021	0.729127	148.485	Bd1-1vsBd3-1	CG
Bd1	23514099	23514249	151	28	0.274299	0.842529	-0.56823	-148.471	Bd1-1vsBd3-1	CG
Bd1	66596013	66596162	150	37	0.267877	0.892279	-0.624402	-148.444	Bd1-1vsBd3-1	CG
Bd1	60899739	60899931	193	14	0.0805071	0.935397	-0.85489	-148.243	Bd1-1vsBd3-1	CG
Bd1	52509669	52509788	120	21	0.942501	0.0969075	0.845593	147.971	Bd1-1vsBd3-1	CG
Bd1	40278799	40279057	259	20	0.942558	0.115565	0.826994	147.937	Bd1-1vsBd3-1	CG
Bd1	65754675	65754967	293	16	0.858994	0.109324	0.74967	147.874	Bd1-1vsBd3-1	CG
Bd1	56107141	56107370	230	20	0.0916516	0.86772	-0.776068	-147.86	Bd1-1vsBd3-1	CG
Bd1	62597829	62597893	65	12	0.0654383	0.945903	-0.880464	-147.615	Bd1-1vsBd3-1	CG
Bd1	148260	148351	92	15	0.0696439	0.860191	-0.790547	-147.564	Bd1-1vsBd3-1	CG
Bd1	1188864	1189075	212	21	0.867237	0.0947586	0.772478	147.476	Bd1-1vsBd3-1	CG
Bd1	70230834	70231022	189	24	0.0588378	0.79265	-0.733812	-147.47	Bd1-1vsBd3-1	CG
Bd1	15300379	15300628	250	19	0.059838	0.866553	-0.806715	-147.395	Bd1-1vsBd3-1	CG
Bd1	58322358	58322640	283	14	0.922827	0.125456	0.797371	147.391	Bd1-1vsBd3-1	CG
Bd1	3466633	3466839	207	14	0.906868	0.125812	0.781056	147.044	Bd1-1vsBd3-1	CG
Bd1	46632666	46632763	98	10	0.0373827	0.929409	-0.892027	-146.996	Bd1-1vsBd3-1	CG
Bd1	51102048	51102193	146	16	0.0474993	0.874912	-0.827413	-146.981	Bd1-1vsBd3-1	CG
Bd1	30298133	30298288	156	11	0.923211	0.0350743	0.888137	146.962	Bd1-1vsBd3-1	CG
Bd1	2059709	2059772	64	9	0.888712	0.0503864	0.838325	146.953	Bd1-1vsBd3-1	CG
Bd1	12266410	12266679	270	18	0.939434	0.211734	0.7277	146.897	Bd1-1vsBd3-1	CG
Bd1	7083508	7083721	214	14	0.051581	0.927009	-0.875428	-146.807	Bd1-1vsBd3-1	CG
Bd1	23462334	23462439	106	12	0.916156	0.066703	0.849453	146.73	Bd1-1vsBd3-1	CG
Bd1	44004919	44005053	135	13	0.946598	0.160092	0.786506	146.423	Bd1-1vsBd3-1	CG
Bd1	34353292	34353381	90	9	0.0625392	0.949785	-0.887246	-146.42	Bd1-1vsBd3-1	CG
Bd1	13611342	13611580	239	21	0.925122	0.0948588	0.830264	146.405	Bd1-1vsBd3-1	CG
Bd1	26841949	26842039	91	12	0.445996	0.967203	-0.521207	-146.308	Bd1-1vsBd3-1	CG
Bd1	1210047	1210119	73	13	0.703602	0.112645	0.590958	146.105	Bd1-1vsBd3-1	CG
Bd1	55457302	55457500	199	15	0.900743	0.0666541	0.834089	146.05	Bd1-1vsBd3-1	CG
Bd1	16105794	16106123	330	30	0.0727338	0.777838	-0.705104	-145.862	Bd1-1vsBd3-1	CG
Bd1	60922450	60922609	160	23	0.0482797	0.701805	-0.653525	-145.802	Bd1-1vsBd3-1	CG
Bd1	51099902	51100098	197	14	0.944973	0.187641	0.757332	145.688	Bd1-1vsBd3-1	CG
Bd1	59336834	59336964	131	19	0.268979	0.921257	-0.652278	-145.673	Bd1-1vsBd3-1	CG
Bd1	47682556	47682815	260	21	0.207929	0.922348	-0.714419	-145.576	Bd1-1vsBd3-1	CG
Bd1	15090493	15090699	207	17	0.925233	0.14507	0.780163	145.326	Bd1-1vsBd3-1	CG
Bd1	28450902	28451027	126	19	0.053745	0.831624	-0.777879	-145.306	Bd1-1vsBd3-1	CG
Bd1	26172047	26172210	164	27	0.0574722	0.710148	-0.652676	-144.816	Bd1-1vsBd3-1	CG
Bd1	49493681	49493757	77	13	0.0497566	0.945299	-0.895542	-144.799	Bd1-1vsBd3-1	CG
Bd1	12183290	12183593	304	14	0.960367	0.0735612	0.886806	144.783	Bd1-1vsBd3-1	CG
Bd1	14313759	14313855	97	23	0.837136	0.0976891	0.739447	144.745	Bd1-1vsBd3-1	CG
Bd1	67629581	67629652	72	13	0.848945	0.110276	0.738669	144.615	Bd1-1vsBd3-1	CG
Bd1	59834822	59835139	318	19	0.897633	0.15207	0.745563	144.547	Bd1-1vsBd3-1	CG
[truncated: 94,173 more rows]
