# Supplementary material for: DNA methylation profiles of diverse Brachypodium distachyon align with underlying genetic diversity
Source: Genome Res. 2016 Nov;26(11):1520–31. doi: 10.1101/gr.205468.116 (PMC5088594; doi:10.1101/gr.205468.116)
Supplement: Supplemental Material [file supp_gr.205468.116_Supplemental_Table_7.xlsx]

## Sheet: Sheet1
Supplemental Table 7: Transposable element polymorphisms in Brachypodium distachyon
Chromosome	Start	Stop	TE_ID	TE present	TE absent
Bd1	64070	69415	Bd1TE2747992	Bd21,Bd1-1,Bd3-1	Koz-3,Bd21-3,BdTR12c,Bd30-1
Bd1	79728	79826	Bd1TE2784275	Bd21,Bd21-3,Bd30-1,Bd3-1,BdTR12c,Koz-3	Bd1-1
Bd1	91151	94923	Bd1TE2767533	Bd21,Bd21-3,Bd30-1,Bd3-1,BdTR12c,Koz-3	Bd1-1
Bd1	196322	201121	Bd1TE2768720	Bd21,Bd1-1,Bd30-1,Bd3-1,BdTR12c,Koz-3	Bd21-3
Bd1	266769	266831	Bd1TE2768889	Bd1-1	Bd21,Bd21-3,Bd30-1,Bd3-1,BdTR12c,Koz-3
Bd1	350115	353929	Bd1TE2767505	Bd21,Bd1-1,Bd21-3	Koz-3,Bd3-1,BdTR12c,Bd30-1
Bd1	380814	380857	Bd4TE2678617	Koz-3,Bd21-3,BdTR12c	Bd21,Bd1-1,Bd30-1,Bd3-1
Bd1	418257	422249	Bd1TE2748241	Bd21,Bd30-1,Bd3-1,BdTR12c,Koz-3	Bd21-3,Bd1-1
Bd1	431683	433522	Bd1TE2749139	Bd21,Bd1-1,Bd30-1,Bd3-1,BdTR12c,Koz-3	Bd21-3
Bd1	502242	502323	Bd2TE2712345,Bd2TE2710834	Bd1-1	Bd21,Bd21-3,Bd30-1,Bd3-1,BdTR12c,Koz-3
Bd1	502736	502824	Bd1TE2768816	Bd1-1	Bd21,Bd21-3,Bd30-1,Bd3-1,BdTR12c,Koz-3
Bd1	504748	504870	Bd2TE2720249	Bd1-1	Bd21,Bd21-3,Bd30-1,Bd3-1,BdTR12c,Koz-3
Bd1	859883	864734	Bd1TE2776640	Bd21,Bd1-1,Bd30-1,Bd3-1,BdTR12c,Koz-3	Bd21-3
Bd1	859930	860019	Bd1TE2762800	Bd21,Bd30-1,Bd3-1,BdTR12c,Koz-3	Bd21-3,Bd1-1
Bd1	865209	865336	Bd1TE2754935	Bd21,Bd1-1,Bd30-1,Bd3-1,BdTR12c,Koz-3	Bd21-3
Bd1	961363	961580	Bd1TE2752720	Bd21,Bd1-1,Bd21-3,Bd30-1,Bd3-1,Koz-3	BdTR12c
Bd1	1169356	1169548	Bd1TE2753336	Bd21,Bd21-3,Bd3-1,Koz-3	BdTR12c,Bd1-1,Bd30-1
Bd1	1204564	1208207	Bd1TE2767590	Bd21,Bd21-3,Bd30-1,Bd3-1,Koz-3	BdTR12c,Bd1-1
Bd1	1257411	1258415	Bd1TE2771830	Bd21,Bd21-3,Bd3-1	Koz-3,BdTR12c,Bd1-1,Bd30-1
Bd1	1409425	1409648	Bd1TE2777624	Bd21,Bd21-3,Bd3-1	Koz-3,BdTR12c,Bd1-1,Bd30-1
Bd1	1486425	1486485	Bd4TE2672263	Bd1-1	Bd21,Bd21-3,Bd30-1,Bd3-1,BdTR12c,Koz-3
Bd1	1490581	1490622	Bd4TE2672263	Koz-3,Bd1-1	Bd21,Bd21-3,Bd30-1,Bd3-1,BdTR12c
Bd1	1493632	1493720	Bd4TE2672263	Bd1-1	Bd21,Bd21-3,Bd30-1,Bd3-1,BdTR12c,Koz-3
Bd1	1718347	1718409	Bd1TE2778672	Bd1-1	Bd21,Bd21-3,Bd30-1,Bd3-1,BdTR12c,Koz-3
Bd1	1913581	1915291	Bd1TE2770163	Bd21,Bd1-1,Bd30-1,Bd3-1,BdTR12c,Koz-3	Bd21-3
Bd1	1938744	1941585	Bd1TE2748663	Bd21,Bd21-3,Bd30-1,Bd3-1,BdTR12c,Koz-3	Bd1-1
Bd1	2134478	2138507	Bd1TE2748231	Bd21,Bd30-1,Bd3-1,BdTR12c,Koz-3	Bd21-3,Bd1-1
Bd1	2138508	2138965	Bd1TE2750902	Bd21,Bd1-1,Bd30-1,Bd3-1,BdTR12c,Koz-3	Bd21-3
Bd1	2296956	2297014	Bd1TE2787785	Bd21,Bd1-1,Bd30-1,Bd3-1,BdTR12c,Koz-3	Bd21-3
Bd1	2348933	2350274	Bd1TE2770946	Bd21,Bd21-3,Bd3-1,BdTR12c,Koz-3	Bd1-1,Bd30-1
Bd1	2378951	2382581	Bd1TE2748334	Bd21,Bd30-1,Bd3-1,BdTR12c,Koz-3	Bd21-3,Bd1-1
Bd1	2428256	2430356	Bd1TE2748973	Bd21,Bd1-1,Bd30-1,Bd3-1,BdTR12c,Koz-3	Bd21-3
Bd1	2713387	2714106	Bd1TE2772637	Bd21,Bd1-1,Bd21-3,Bd3-1	Koz-3,BdTR12c,Bd30-1
Bd1	2756799	2756845	Bd2TE2703888	Bd30-1	Bd21,Bd1-1,Bd21-3,Bd3-1,BdTR12c,Koz-3
Bd1	2803615	2804959	Bd1TE2770921	Bd21,Bd21-3,Bd30-1,Bd3-1,BdTR12c,Koz-3	Bd1-1
Bd1	2990045	2990172	Bd1TE2755083	Bd21,Bd21-3,Bd3-1,BdTR12c,Koz-3	Bd1-1,Bd30-1
Bd1	3510704	3510816	Bd1TE2758722	Bd21,Bd21-3,Bd30-1,Bd3-1,BdTR12c,Koz-3	Bd1-1
Bd1	3512665	3512735	Bd1TE2784878	Bd21,Bd21-3,Bd30-1,Bd3-1,BdTR12c,Koz-3	Bd1-1
Bd1	3553272	3554597	Bd1TE2771124	Bd21,Bd21-3,Bd30-1,Bd3-1,BdTR12c,Koz-3	Bd1-1
Bd1	3805371	3805611	Bd1TE2752156	Bd21,Bd1-1,Bd21-3,Bd3-1	Koz-3,BdTR12c,Bd30-1
Bd1	3889680	3894318	Bd1TE2767080	Bd21,Bd1-1,Bd30-1,Bd3-1,BdTR12c,Koz-3	Bd21-3
Bd1	3982669	3982786	Bd1TE2756195	Bd21,Bd30-1,Bd3-1,BdTR12c,Koz-3	Bd21-3,Bd1-1
Bd1	4058931	4059024	Bd1TE2784685	Bd21,Bd1-1,Bd21-3,Bd3-1,Koz-3	BdTR12c,Bd30-1
Bd1	4059060	4060332	Bd1TE2771355	Bd21,Bd1-1,Bd21-3,Bd3-1,Koz-3	BdTR12c,Bd30-1
Bd1	4183730	4187940	Bd1TE2748202	Bd21,Bd1-1,Bd30-1,Bd3-1,BdTR12c,Koz-3	Bd21-3
Bd1	4444202	4444237	Bd1TE2761478	Koz-3	Bd21,Bd1-1,Bd21-3,Bd30-1,Bd3-1,BdTR12c
Bd1	4546387	4546510	Bd1TE2755620	Bd21,Bd21-3,Bd30-1,Bd3-1,BdTR12c,Koz-3	Bd1-1
Bd1	4666048	4666142	Bd1TE2761859	Bd21,Bd1-1,Bd30-1,Bd3-1,BdTR12c,Koz-3	Bd21-3
Bd1	4666401	4669666	Bd1TE2748494	Bd21,Bd1-1,Bd30-1,Bd3-1,BdTR12c,Koz-3	Bd21-3
Bd1	4728968	4731908	Bd1TE2748628	Bd21,Bd1-1,Bd30-1,Bd3-1,BdTR12c,Koz-3	Bd21-3
Bd1	4791854	4795656	Bd1TE2748285	Bd21,Bd30-1,Bd3-1,BdTR12c,Koz-3	Bd21-3,Bd1-1
Bd1	4890864	4892209	Bd1TE2770909	Bd21,Bd1-1,BdTR12c	Koz-3,Bd3-1,Bd21-3,Bd30-1
Bd1	4913712	4918675	Bd1TE2766922	Bd21,Bd1-1,Bd30-1,Bd3-1,BdTR12c,Koz-3	Bd21-3
Bd1	4959566	4959665	Bd1TE2761032	Bd21,Bd1-1,Bd30-1,Bd3-1,Koz-3	Bd21-3,BdTR12c
Bd1	5231472	5231564	Bd1TE2762312	Bd21,Bd1-1,Bd21-3,Bd30-1,Bd3-1,BdTR12c	Koz-3
Bd1	5461946	5463379	Bd1TE2749428	Bd21,Bd1-1,Bd30-1,Bd3-1,BdTR12c,Koz-3	Bd21-3
Bd1	5918436	5922766	Bd1TE2767232	Bd21,Bd1-1,Bd30-1,Bd3-1,BdTR12c,Koz-3	Bd21-3
Bd1	6005506	6009637	Bd1TE2771665	Bd21,Bd1-1,Bd30-1,Bd3-1,BdTR12c,Koz-3	Bd21-3
Bd1	6006012	6006093	Bd1TE2785578	Bd21,Bd30-1,Bd3-1,BdTR12c,Koz-3	Bd21-3,Bd1-1
Bd1	6006941	6008984	Bd1TE2748997	Bd21,Bd30-1,Bd3-1,BdTR12c,Koz-3	Bd21-3,Bd1-1
Bd1	6066890	6067066	Bd1TE2779255	Bd21,Bd1-1,Bd21-3,Bd30-1,BdTR12c,Koz-3	Bd3-1
Bd1	6618486	6618715	Bd1TE2775504	Bd21,Bd21-3,Bd30-1,Bd3-1,BdTR12c,Koz-3	Bd1-1
Bd1	6618716	6622179	Bd1TE2748394	Bd21,Bd21-3,Bd30-1,Bd3-1,BdTR12c,Koz-3	Bd1-1
Bd1	6900250	6903788	Bd1TE2748382	Bd21,Bd21-3,Bd30-1,Bd3-1,BdTR12c,Koz-3	Bd1-1
Bd1	7106447	7106677	Bd1TE2777489	Bd21,Bd21-3,Bd30-1,Bd3-1,BdTR12c,Koz-3	Bd1-1
Bd1	7553173	7553416	Bd1TE2752084	Bd21,Bd21-3,Bd30-1,Bd3-1,BdTR12c,Koz-3	Bd1-1
Bd1	7559805	7561151	Bd1TE2770905	Bd21,Bd21-3,Bd30-1,Bd3-1,BdTR12c,Koz-3	Bd1-1
Bd1	7834688	7834752	Bd1TE2765447	Bd21,Bd21-3,Bd30-1,Bd3-1,BdTR12c,Koz-3	Bd1-1
Bd1	7851391	7851433	Bd3TE2706264	BdTR12c	Bd21,Bd1-1,Bd21-3,Bd30-1,Bd3-1,Koz-3
Bd1	7851778	7851838	Bd1TE2787532	Bd21,Bd21-3,Bd30-1,Bd3-1,BdTR12c,Koz-3	Bd1-1
Bd1	7854989	7855068	Bd1TE2764193	Bd21,Bd21-3,Bd3-1,BdTR12c,Koz-3	Bd1-1,Bd30-1
Bd1	7986947	7987535	Bd1TE2773256	Bd21,Bd1-1,Bd30-1,Bd3-1,BdTR12c,Koz-3	Bd21-3
Bd1	8092651	8093911	Bd1TE2771371	Bd21,Bd1-1,Bd30-1,Bd3-1,Koz-3	Bd21-3,BdTR12c
Bd1	8155502	8160661	Bd1TE2748049	Bd21,Bd21-3,Bd30-1,Bd3-1,BdTR12c,Koz-3	Bd1-1
Bd1	8474919	8476244	Bd1TE2771118	Bd21,Bd21-3,Bd3-1,BdTR12c,Koz-3	Bd1-1,Bd30-1
Bd1	8495638	8498950	Bd1TE2767903	Bd21,Bd21-3,Bd30-1,Bd3-1,BdTR12c,Koz-3	Bd1-1
Bd1	8894913	8898825	Bd1TE2748263	Bd21,Bd30-1,Bd3-1,BdTR12c,Koz-3	Bd21-3,Bd1-1
Bd1	8910465	8910675	Bd1TE2752857	Bd21,Bd21-3,Bd30-1,Bd3-1,Koz-3	BdTR12c,Bd1-1
Bd1	9014926	9015053	Bd1TE2755078	Bd21,Bd1-1,Bd21-3,Bd30-1,BdTR12c,Koz-3	Bd3-1
Bd1	9036159	9040807	Bd1TE2767072	Bd21,Bd1-1,Bd30-1,Bd3-1,BdTR12c,Koz-3	Bd21-3
Bd1	9100463	9101178	Bd1TE2772650	Bd21,Bd21-3,Bd3-1,Koz-3	BdTR12c,Bd1-1,Bd30-1
Bd1	9132034	9132161	Bd1TE2755110	Bd21,Bd1-1,Bd21-3,Bd30-1,BdTR12c,Koz-3	Bd3-1
Bd1	9229154	9229206	Bd1TE2748427	Bd1-1	Bd21,Bd21-3,Bd30-1,Bd3-1,BdTR12c,Koz-3
Bd1	9644892	9648464	Bd1TE2748364	Bd21,Bd21-3,Bd30-1,Bd3-1,BdTR12c,Koz-3	Bd1-1
Bd1	9884407	9899483	Bd1TE2747468	Bd21,Bd21-3,Bd30-1,Bd3-1,BdTR12c,Koz-3	Bd1-1
Bd1	9992143	9992398	Bd1TE2776983	Bd21,Bd21-3,Bd30-1,Bd3-1,BdTR12c,Koz-3	Bd1-1
Bd1	10122339	10122391	Bd1TE2788248	Bd21,Bd1-1,Bd30-1,Bd3-1,BdTR12c,Koz-3	Bd21-3
Bd1	10219380	10219494	Bd1TE2758448	Bd21,Bd30-1,Bd3-1,BdTR12c,Koz-3	Bd21-3,Bd1-1
Bd1	10225268	10225516	Bd1TE2751944	Bd21,Bd30-1,Bd3-1,BdTR12c,Koz-3	Bd21-3,Bd1-1
Bd1	10274315	10275657	Bd1TE2770936	Bd21,Bd1-1,Bd21-3,Bd30-1,Bd3-1,Koz-3	BdTR12c
Bd1	10286600	10287666	Bd1TE2771684	Bd21,Bd1-1,Bd21-3,Bd3-1	Koz-3,BdTR12c,Bd30-1
Bd1	10330697	10331273	Bd1TE2773324	Bd21,Bd30-1,Bd3-1	Koz-3,Bd21-3,Bd1-1,BdTR12c
Bd1	10331274	10334076	Bd1TE2768556	Bd21,Bd30-1,Bd3-1	Koz-3,Bd21-3,Bd1-1,BdTR12c
Bd1	10342836	10342888	Bd1TE2767616	Bd1-1	Bd21,Bd21-3,Bd30-1,Bd3-1,BdTR12c,Koz-3
Bd1	10358140	10358268	Bd1TE2782273	Bd21,Bd21-3,Bd30-1,Bd3-1,BdTR12c,Koz-3	Bd1-1
Bd1	10377897	10378225	Bd1TE2775776	Bd21,Bd21-3,Bd30-1,Bd3-1,BdTR12c,Koz-3	Bd1-1
Bd1	10378430	10381056	Bd1TE2768742	Bd21,Bd21-3,Bd30-1,Bd3-1,BdTR12c	Koz-3,Bd1-1
Bd1	10381057	10382410	Bd1TE2770865	Bd21,Bd21-3,Bd30-1,Bd3-1,BdTR12c	Koz-3,Bd1-1
Bd1	10382411	10382708	Bd1TE2776197	Bd21,Bd30-1,Bd3-1,BdTR12c	Koz-3,Bd21-3,Bd1-1
Bd1	10382709	10384726	Bd1TE2769593	Bd21,Bd30-1,Bd3-1,BdTR12c,Koz-3	Bd21-3,Bd1-1
Bd1	10386052	10386290	Bd1TE2777332	Bd21,Bd21-3,Bd30-1,Bd3-1,BdTR12c,Koz-3	Bd1-1
Bd1	10399824	10399908	Bd1TE2763696	Bd21,Bd21-3,Bd3-1	Koz-3,BdTR12c,Bd1-1,Bd30-1
Bd1	10475354	10476725	Bd1TE2770775	Bd21,Bd1-1,Bd21-3	Koz-3,Bd3-1,BdTR12c,Bd30-1
Bd1	10595366	10600019	Bd1TE2748128	Bd21,Bd1-1,Bd30-1,Bd3-1,BdTR12c,Koz-3	Bd21-3
Bd1	10655188	10655384	Bd1TE2753220	Bd21,Bd30-1,Bd3-1,BdTR12c,Koz-3	Bd21-3,Bd1-1
Bd1	10887535	10890450	Bd1TE2768439	Bd21,Bd21-3,Bd30-1,Bd3-1,BdTR12c,Koz-3	Bd1-1
Bd1	11081652	11085776	Bd1TE2779659	Bd21,Bd1-1,Bd30-1,Bd3-1,BdTR12c,Koz-3	Bd21-3
Bd1	11081711	11085700	Bd1TE2748243	Bd21,Bd1-1,Bd30-1,Bd3-1,BdTR12c,Koz-3	Bd21-3
Bd1	11085702	11085774	Bd1TE2764889	Bd21,Bd1-1,Bd30-1,Bd3-1,BdTR12c,Koz-3	Bd21-3
Bd1	11119148	11119388	Bd1TE2752152	Bd21,Bd21-3,Bd30-1,Bd3-1,BdTR12c,Koz-3	Bd1-1
Bd1	11240036	11244157	Bd1TE2782957	Bd21,Bd1-1,Bd30-1,Bd3-1,BdTR12c,Koz-3	Bd21-3
Bd1	11240625	11240779	Bd1TE2754393	Bd21,Bd1-1,Bd30-1,Bd3-1,BdTR12c,Koz-3	Bd21-3
Bd1	11241486	11242815	Bd1TE2771060	Bd21,Bd1-1,Bd30-1,Bd3-1,BdTR12c,Koz-3	Bd21-3
Bd1	11273432	11277079	Bd1TE2748332	Bd21,Bd30-1,Bd3-1,BdTR12c,Koz-3	Bd21-3,Bd1-1
Bd1	11443992	11444805	Bd1TE2772391	Bd21,Bd21-3,Bd30-1,Bd3-1,BdTR12c,Koz-3	Bd1-1
Bd1	11670305	11670545	Bd1TE2752168	Bd21,Bd21-3,Bd30-1,Bd3-1,BdTR12c,Koz-3	Bd1-1
Bd1	11797384	11797511	Bd1TE2755150	Bd21,Bd21-3,Bd30-1,Bd3-1,BdTR12c,Koz-3	Bd1-1
Bd1	11864926	11867971	Bd1TE2768310	Bd21,Bd21-3,Bd30-1,Bd3-1,BdTR12c,Koz-3	Bd1-1
Bd1	12192870	12192998	Bd1TE2754875	Bd21,Bd21-3,Bd30-1,Bd3-1,BdTR12c,Koz-3	Bd1-1
Bd1	12352433	12353736	Bd1TE2771251	Bd21,Bd30-1,Bd3-1,BdTR12c,Koz-3	Bd21-3,Bd1-1
Bd1	12473703	12473776	Bd3TE2715915	Bd21-3	Bd21,Bd1-1,Bd30-1,Bd3-1,BdTR12c,Koz-3
Bd1	12582384	12583174	Bd1TE2750193	Bd21,Bd30-1,Bd3-1,BdTR12c,Koz-3	Bd21-3,Bd1-1
Bd1	12621699	12621788	Bd1TE2784982	Bd21,Bd21-3,Bd30-1,Bd3-1,BdTR12c,Koz-3	Bd1-1
Bd1	12722208	12722276	Bd3TE2691258	Bd21-3	Bd21,Bd1-1,Bd30-1,Bd3-1,BdTR12c,Koz-3
Bd1	13011651	13012656	Bd1TE2771826	Bd21,Bd21-3,Bd30-1,Bd3-1,BdTR12c,Koz-3	Bd1-1
Bd1	13150721	13151572	Bd1TE2772264	Bd21,Bd21-3,Bd30-1,Bd3-1,BdTR12c,Koz-3	Bd1-1
Bd1	13151742	13151824	Bd3TE2703594,Bd3TE2706248	Bd1-1	Bd21,Bd21-3,Bd30-1,Bd3-1,BdTR12c,Koz-3
Bd1	13168382	13172413	Bd1TE2748229	Bd21,Bd21-3,Bd30-1,Bd3-1,BdTR12c,Koz-3	Bd1-1
Bd1	13172702	13172823	Bd1TE2782782	Bd21,Bd1-1,Bd30-1,Bd3-1,BdTR12c,Koz-3	Bd21-3
Bd1	13248088	13250951	Bd1TE2768492	Bd21,Bd21-3,Bd30-1,Bd3-1,BdTR12c,Koz-3	Bd1-1
Bd1	13280823	13282147	Bd1TE2771143	Bd21,Bd1-1,Bd21-3,Bd30-1,Bd3-1	Koz-3,BdTR12c
Bd1	13358987	13360329	Bd1TE2770932	Bd21,Bd1-1,Bd21-3	Koz-3,Bd3-1,BdTR12c,Bd30-1
Bd1	13531868	13532054	Bd1TE2753461	Bd21,Bd21-3,Bd30-1,BdTR12c,Koz-3	Bd3-1,Bd1-1
Bd1	13580390	13580455	Bd1TE2787030	Bd21,Bd1-1,Bd21-3,Bd30-1,Bd3-1,Koz-3	BdTR12c
Bd1	13593234	13593894	Bd1TE2772845	Bd21,Bd21-3,Bd30-1,Bd3-1,BdTR12c,Koz-3	Bd1-1
Bd1	13677556	13678904	Bd1TE2770897	Bd21,Bd21-3,Bd30-1,BdTR12c,Koz-3	Bd3-1,Bd1-1
Bd1	13744040	13748564	Bd1TE2748151	Bd21,Bd30-1,Bd3-1,BdTR12c,Koz-3	Bd21-3,Bd1-1
Bd1	13845318	13845393	Bd1TE2764571	Bd21,Bd1-1,Bd21-3,Bd30-1,Bd3-1,Koz-3	BdTR12c
Bd1	13884756	13889938	Bd1TE2748037	Bd21,Bd21-3,Bd30-1,Bd3-1,BdTR12c,Koz-3	Bd1-1
Bd1	13928283	13932527	Bd1TE2767263	Bd21,Bd1-1,Bd30-1,Bd3-1,BdTR12c,Koz-3	Bd21-3
Bd1	13932537	13932800	Bd1TE2776788	Bd21,Bd1-1,Bd30-1,Bd3-1,BdTR12c,Koz-3	Bd21-3
Bd1	13951442	13956105	Bd1TE2748126	Bd21,Bd1-1,Bd30-1,Bd3-1,BdTR12c,Koz-3	Bd21-3
Bd1	14052771	14056375	Bd1TE2767630	Bd21,Bd21-3,Bd30-1,BdTR12c,Koz-3	Bd3-1,Bd1-1
Bd1	14057597	14058191	Bd1TE2773218	Bd21,Bd1-1,Bd21-3,Bd3-1,BdTR12c,Koz-3	Bd30-1
Bd1	14066297	14068525	Bd1TE2769287	Bd21,Bd21-3,Bd30-1,Bd3-1,BdTR12c,Koz-3	Bd1-1
Bd1	14152875	14152917	Bd2TE2698865	Bd3-1,Bd21-3	Bd21,Bd1-1,Bd30-1,BdTR12c,Koz-3
Bd1	14175556	14175774	Bd1TE2752672	Bd21,Bd30-1,BdTR12c,Koz-3	Bd3-1,Bd21-3,Bd1-1
Bd1	14243476	14243559	Bd1TE2785401	Bd21,Bd1-1,Bd21-3,Bd30-1,Bd3-1,Koz-3	BdTR12c
Bd1	14365476	14366592	Bd1TE2771611	Bd21,Bd21-3,Bd30-1,Bd3-1,BdTR12c,Koz-3	Bd1-1
Bd1	14366746	14368100	Bd1TE2770846	Bd21,Bd21-3,Bd30-1,Bd3-1,BdTR12c,Koz-3	Bd1-1
Bd1	14400828	14401136	Bd1TE2776045	Bd21,Bd1-1,Bd30-1,Bd3-1,BdTR12c,Koz-3	Bd21-3
Bd1	14440395	14440633	Bd1TE2752234	Bd21,Bd21-3,Bd30-1,Bd3-1,BdTR12c,Koz-3	Bd1-1
Bd1	14440724	14440801	Bd2TE2720011,Bd2TE2699929	Bd1-1	Bd21,Bd21-3,Bd30-1,Bd3-1,BdTR12c,Koz-3
Bd1	14677702	14677827	Bd1TE2755497	Bd21,Bd21-3,Bd30-1,Bd3-1,BdTR12c,Koz-3	Bd1-1
Bd1	14797857	14801485	Bd1TE2748336	Bd21,Bd1-1,Bd30-1,Bd3-1,BdTR12c,Koz-3	Bd21-3
Bd1	15292616	15292695	Bd1TE2785821	Bd21,Bd21-3,Bd30-1,Bd3-1,BdTR12c,Koz-3	Bd1-1
Bd1	15456805	15469431	Bd1TE2747549	Bd21,Bd21-3,Bd30-1,Bd3-1,BdTR12c,Koz-3	Bd1-1
Bd1	15468775	15468856	Bd1TE2763988	Bd21,Bd21-3,Bd30-1,Bd3-1,BdTR12c,Koz-3	Bd1-1
Bd1	15684955	15685047	Bd1TE2748102	Bd1-1	Bd21,Bd21-3,Bd30-1,Bd3-1,BdTR12c,Koz-3
Bd1	15690644	15690996	Bd1TE2751202	Bd21,Bd1-1,Bd30-1,Bd3-1,BdTR12c,Koz-3	Bd21-3
Bd1	15801274	15801328	Bd1TE2788109	Bd21,Bd1-1,Bd30-1,Bd3-1,BdTR12c,Koz-3	Bd21-3
Bd1	15801377	15801493	Bd1TE2757603	Bd21,Bd1-1,Bd30-1,Bd3-1,BdTR12c,Koz-3	Bd21-3
Bd1	16222540	16225899	Bd1TE2748458	Bd21,Bd21-3,Bd30-1,Bd3-1,BdTR12c,Koz-3	Bd1-1
Bd1	16426570	16427893	Bd1TE2771151	Bd21,Bd21-3,Bd30-1,Bd3-1,BdTR12c,Koz-3	Bd1-1
Bd1	16709083	16713305	Bd1TE2767257	Bd21,Bd1-1,Bd30-1,Bd3-1,BdTR12c,Koz-3	Bd21-3
Bd1	16717646	16718049	Bd1TE2774940	Bd21,Bd21-3,Bd30-1,Bd3-1,BdTR12c,Koz-3	Bd1-1
Bd1	16741679	16746491	Bd1TE2766984	Bd21,Bd1-1,Bd30-1,Bd3-1,BdTR12c,Koz-3	Bd21-3
Bd1	16904453	16908382	Bd1TE2748253	Bd21,Bd1-1,Bd30-1,Bd3-1,BdTR12c,Koz-3	Bd21-3
Bd1	17231915	17232623	Bd1TE2777816	Bd21,Bd30-1,Bd3-1,BdTR12c,Koz-3	Bd21-3,Bd1-1
Bd1	17232739	17232791	Bd1TE2788315	Bd21,Bd30-1,Bd3-1,BdTR12c,Koz-3	Bd21-3,Bd1-1
Bd1	17237153	17237253	Bd1TE2760867	Bd21,Bd30-1,BdTR12c,Koz-3	Bd3-1,Bd21-3,Bd1-1
Bd1	17423683	17423810	Bd1TE2755291	Bd21,Bd1-1,Bd21-3,Bd3-1	Koz-3,BdTR12c,Bd30-1
Bd1	17648160	17649104	Bd1TE2771977	Bd21,Bd21-3,Bd30-1,Bd3-1,BdTR12c,Koz-3	Bd1-1
Bd1	17820096	17820214	Bd1TE2756163	Bd21,Bd21-3,Bd30-1,Bd3-1,BdTR12c,Koz-3	Bd1-1
Bd1	17962562	17962688	Bd1TE2755419	Bd21,Bd1-1,Bd30-1,Bd3-1,BdTR12c,Koz-3	Bd21-3
Bd1	17964843	17964881	Bd1TE2757864	Koz-3,BdTR12c	Bd21,Bd1-1,Bd21-3,Bd30-1,Bd3-1
Bd1	17985121	17989349	Bd1TE2773244	Bd21,Bd21-3,Bd30-1,Bd3-1,BdTR12c,Koz-3	Bd1-1
Bd1	18186943	18187876	Bd1TE2772004	Bd21,Bd21-3,Bd30-1,Bd3-1,BdTR12c,Koz-3	Bd1-1
Bd1	18302288	18302330	Bd2TE2694013,Bd2TE2713124	Bd1-1	Bd21,Bd21-3,Bd30-1,Bd3-1,BdTR12c,Koz-3
Bd1	18411009	18415043	Bd1TE2748228	Bd21,Bd30-1,Bd3-1,BdTR12c,Koz-3	Bd21-3,Bd1-1
Bd1	18567912	18571749	Bd1TE2767493	Bd21,Bd21-3,Bd30-1,Bd3-1,BdTR12c,Koz-3	Bd1-1
Bd1	18691560	18691680	Bd1TE2782836	Bd21,Bd1-1,Bd30-1,Bd3-1,BdTR12c,Koz-3	Bd21-3
Bd1	18756354	18759147	Bd1TE2768563	Bd21,Bd30-1,Bd3-1,BdTR12c,Koz-3	Bd21-3,Bd1-1
Bd1	18759244	18759464	Bd1TE2777704	Bd21,Bd30-1,Bd3-1,BdTR12c,Koz-3	Bd21-3,Bd1-1
Bd1	18759465	18759631	Bd1TE2779811	Bd21,Bd30-1,Bd3-1,BdTR12c,Koz-3	Bd21-3,Bd1-1
Bd1	18847461	18847699	Bd1TE2752240	Bd21,Bd1-1,Bd21-3,Bd3-1,BdTR12c,Koz-3	Bd30-1
Bd1	18918688	18918858	Bd1TE2779566	Bd21,Bd21-3,Bd30-1,Bd3-1,BdTR12c,Koz-3	Bd1-1
Bd1	18947381	18947467	Bd4TE2678449	Koz-3,Bd30-1	Bd21,Bd1-1,Bd21-3,Bd3-1,BdTR12c
Bd1	19224676	19224749	Bd1TE2747663,Bd1TE2766418	Bd1-1	Bd21,Bd21-3,Bd30-1,Bd3-1,BdTR12c,Koz-3
Bd1	19264209	19264428	Bd1TE2752636	Bd21,Bd1-1,Bd21-3,Bd3-1	Koz-3,BdTR12c,Bd30-1
Bd1	19295269	19295432	Bd1TE2779963	Bd21,Bd1-1,Bd21-3,Bd30-1,Bd3-1	Koz-3,BdTR12c
Bd1	19487456	19490893	Bd1TE2748411	Bd21,Bd21-3,Bd30-1,Bd3-1,BdTR12c,Koz-3	Bd1-1
Bd1	19593586	19594457	Bd1TE2772117	Bd21,Bd21-3,Bd30-1,Bd3-1,BdTR12c,Koz-3	Bd1-1
Bd1	19776625	19780419	Bd1TE2748287	Bd21,Bd30-1,Bd3-1,BdTR12c,Koz-3	Bd21-3,Bd1-1
Bd1	19780420	19780486	Bd1TE2786205	Bd21,Bd30-1,Bd3-1,Koz-3	Bd21-3,Bd1-1,BdTR12c
Bd1	19867189	19867510	Bd1TE2751388	Bd21,Bd30-1,Bd3-1,BdTR12c,Koz-3	Bd21-3,Bd1-1
Bd1	19867587	19868779	Bd1TE2749658	Bd21,Bd30-1,Bd3-1,BdTR12c,Koz-3	Bd21-3,Bd1-1
Bd1	19868897	19869104	Bd1TE2752960	Bd21,Bd30-1,Bd3-1,BdTR12c,Koz-3	Bd21-3,Bd1-1
Bd1	19869199	19870283	Bd1TE2749777	Bd21,Bd30-1,Bd3-1,BdTR12c,Koz-3	Bd21-3,Bd1-1
Bd1	20017817	20018527	Bd1TE2772664	Bd21,Bd21-3,Bd30-1,Bd3-1,BdTR12c	Koz-3,Bd1-1
Bd1	20217304	20226061	Bd1TE2747706	Bd21,Bd21-3,Bd3-1,BdTR12c	Koz-3,Bd1-1,Bd30-1
Bd1	20405586	20405650	Bd1TE2765479	Bd21,Bd1-1,Bd30-1,Bd3-1,BdTR12c,Koz-3	Bd21-3
Bd1	20405651	20409578	Bd1TE2748257	Bd21,Bd1-1,Bd30-1,Bd3-1,BdTR12c,Koz-3	Bd21-3
Bd1	20409579	20409733	Bd1TE2754347	Bd21,Bd1-1,Bd30-1,Bd3-1,BdTR12c,Koz-3	Bd21-3
Bd1	20548286	20548504	Bd1TE2752670	Bd21,Bd21-3,Bd30-1,Bd3-1,BdTR12c,Koz-3	Bd1-1
Bd1	20664514	20664630	Bd1TE2757383	Bd21,Bd30-1,Bd3-1,BdTR12c,Koz-3	Bd21-3,Bd1-1
Bd1	20940735	20945013	Bd1TE2748192	Bd21,Bd1-1,Bd30-1,Bd3-1,BdTR12c,Koz-3	Bd21-3
Bd1	20968689	20970025	Bd1TE2770992	Bd21,Bd21-3,Bd30-1,Bd3-1,BdTR12c,Koz-3	Bd1-1
Bd1	21216409	21216525	Bd1TE2756630	Bd21	Koz-3,Bd3-1,BdTR12c,Bd21-3,Bd1-1,Bd30-1
Bd1	21229287	21232690	Bd1TE2748439	Bd21,Bd30-1,Bd3-1,BdTR12c,Koz-3	Bd21-3,Bd1-1
Bd1	21799922	21814369	Bd1TE2765860	Bd21,Bd1-1,Bd21-3,Bd30-1,Bd3-1,Koz-3	BdTR12c
Bd1	21814433	21818736	Bd1TE2748180	Bd21,Bd1-1,Bd30-1,Bd3-1,BdTR12c,Koz-3	Bd21-3
Bd1	21859667	21860993	Bd1TE2771095	Bd21,Bd21-3,Bd30-1,Bd3-1,BdTR12c,Koz-3	Bd1-1
Bd1	21947140	21947245	Bd1TE2760092	Bd21,Bd1-1,Bd30-1,Bd3-1,BdTR12c,Koz-3	Bd21-3
Bd1	21976679	21979969	Bd1TE2748482	Bd21,Bd1-1,Bd30-1,Bd3-1,BdTR12c,Koz-3	Bd21-3
Bd1	22124444	22124636	Bd1TE2753328	Bd21,Bd1-1	Koz-3,Bd3-1,Bd21-3,BdTR12c,Bd30-1
Bd1	22175155	22178324	Bd1TE2768141	Bd21,Bd21-3,Bd30-1,Bd3-1,BdTR12c,Koz-3	Bd1-1
Bd1	22191054	22192394	Bd1TE2770952	Bd21	Koz-3,Bd3-1,BdTR12c,Bd21-3,Bd1-1,Bd30-1
Bd1	22405534	22408715	Bd1TE2748524	Bd21,Bd21-3,Bd30-1,Bd3-1,BdTR12c,Koz-3	Bd1-1
Bd1	22453714	22453850	Bd1TE2781543	Bd21,Bd1-1,Bd30-1,Bd3-1,BdTR12c,Koz-3	Bd21-3
Bd1	22613106	22616411	Bd1TE2767928	Bd21,Bd21-3,Bd30-1,Bd3-1,BdTR12c,Koz-3	Bd1-1
Bd1	22667052	22667412	Bd1TE2775382	Bd21,Bd21-3,Bd30-1,Bd3-1,BdTR12c,Koz-3	Bd1-1
Bd1	22667413	22671752	Bd1TE2767228	Bd21,Bd21-3,Bd30-1,Bd3-1,BdTR12c,Koz-3	Bd1-1
Bd1	22671753	22672239	Bd1TE2774093	Bd21,Bd1-1,Bd21-3,Bd30-1,Bd3-1,Koz-3	BdTR12c
Bd1	22684106	22684848	Bd1TE2772579	Bd21,Bd21-3,Bd30-1,Bd3-1,BdTR12c,Koz-3	Bd1-1
Bd1	22684854	22685411	Bd1TE2773439	Bd21,Bd21-3,Bd30-1,Bd3-1,BdTR12c,Koz-3	Bd1-1
Bd1	22686239	22686478	Bd1TE2777308	Bd21,Bd30-1,BdTR12c,Koz-3	Bd3-1,Bd21-3,Bd1-1
Bd1	22686479	22687119	Bd1TE2772965	Bd21,Bd30-1,BdTR12c,Koz-3	Bd3-1,Bd21-3,Bd1-1
Bd1	22703690	22706937	Bd1TE2768026	Bd21,Bd21-3,Bd30-1,Bd3-1,BdTR12c,Koz-3	Bd1-1
Bd1	22716725	22716838	Bd1TE2783332	Bd21,Bd1-1,Bd30-1,Bd3-1,BdTR12c,Koz-3	Bd21-3
Bd1	22716839	22716912	Bd1TE2786287	Bd21,Bd1-1,Bd30-1,Bd3-1,BdTR12c,Koz-3	Bd21-3
Bd1	22896250	22896448	Bd1TE2778317	Bd21,Bd1-1,Bd30-1,Bd3-1,BdTR12c,Koz-3	Bd21-3
Bd1	22999717	23001042	Bd1TE2771121	Bd21,Bd21-3,Bd30-1,Bd3-1,BdTR12c,Koz-3	Bd1-1
Bd1	23027051	23027134	Bd4TE2672008	BdTR12c	Bd21,Bd1-1,Bd21-3,Bd30-1,Bd3-1,Koz-3
Bd1	23159490	23163178	Bd1TE2748314	Bd21,Bd21-3,Bd30-1,Bd3-1,BdTR12c,Koz-3	Bd1-1
Bd1	23230873	23235494	Bd1TE2748130	Bd21,Bd1-1,Bd30-1,Bd3-1,BdTR12c,Koz-3	Bd21-3
Bd1	23238096	23239482	Bd1TE2749480	Bd21,Bd30-1,Bd3-1,BdTR12c,Koz-3	Bd21-3,Bd1-1
Bd1	23239525	23239740	Bd1TE2752752	Bd21,Bd30-1,Bd3-1,BdTR12c,Koz-3	Bd21-3,Bd1-1
Bd1	23240005	23240547	Bd1TE2750639	Bd21,Bd30-1,Bd3-1,BdTR12c,Koz-3	Bd21-3,Bd1-1
Bd1	23527616	23527666	Bd1TE2788424	Bd21,Bd30-1,Bd3-1,BdTR12c,Koz-3	Bd21-3,Bd1-1
Bd1	23529516	23531878	Bd1TE2769087	Bd21,Bd21-3,Bd30-1,Bd3-1,BdTR12c,Koz-3	Bd1-1
Bd1	23531879	23532540	Bd1TE2772841	Bd21,Bd21-3,Bd30-1,Bd3-1,BdTR12c,Koz-3	Bd1-1
Bd1	23534232	23534295	Bd5TE2641727	Bd30-1	Bd21,Bd1-1,Bd21-3,Bd3-1,BdTR12c,Koz-3
Bd1	23758445	23758491	Bd2TE2711499	Koz-3	Bd21,Bd1-1,Bd21-3,Bd30-1,Bd3-1,BdTR12c
Bd1	24050382	24050509	Bd1TE2755056	Bd21,Bd1-1,Bd30-1,Bd3-1,BdTR12c,Koz-3	Bd21-3
Bd1	24053314	24053435	Bd1TE2755890	Bd21,Bd30-1,Bd3-1,Koz-3	Bd21-3,Bd1-1,BdTR12c
Bd1	24147665	24148090	Bd1TE2774718	Bd21,Bd1-1,Bd30-1,Bd3-1,BdTR12c,Koz-3	Bd21-3
Bd1	24148097	24152385	Bd1TE2748190	Bd21,Bd1-1,Bd30-1,Bd3-1,BdTR12c,Koz-3	Bd21-3
Bd1	24234404	24234539	Bd1TE2748330	Bd1-1	Bd21,Bd21-3,Bd30-1,Bd3-1,BdTR12c,Koz-3
Bd1	24239426	24243080	Bd1TE2748330	Bd21,Bd1-1,Bd30-1,Bd3-1,BdTR12c,Koz-3	Bd21-3
Bd1	24311464	24311542	Bd1TE2764338	Bd21,Bd1-1,Bd30-1,Bd3-1,BdTR12c,Koz-3	Bd21-3
Bd1	24311543	24311628	Bd1TE2781669	Bd21,Bd1-1,Bd30-1,Bd3-1,BdTR12c,Koz-3	Bd21-3
Bd1	24339568	24339619	Bd1TE2788321	Bd21,Bd1-1,Bd21-3,Bd3-1,Koz-3	BdTR12c,Bd30-1
Bd1	24339620	24347797	Bd1TE2747757	Bd21,Bd21-3,Bd3-1	Koz-3,BdTR12c,Bd1-1,Bd30-1
Bd1	24347797	24347850	Bd1TE2788321	Koz-3,BdTR12c,Bd30-1	Bd21,Bd1-1,Bd21-3,Bd3-1
Bd1	24360858	24370122	Bd1TE2747681	Bd21,Bd3-1	Koz-3,Bd21-3,Bd1-1,BdTR12c,Bd30-1
Bd1	24370868	24374096	Bd1TE2748506	Bd21,Bd1-1,Bd30-1,Bd3-1,BdTR12c,Koz-3	Bd21-3
Bd1	24441675	24441808	Bd1TE2781845	Bd21,Bd21-3,Bd30-1,Bd3-1,BdTR12c,Koz-3	Bd1-1
Bd1	24462323	24463506	Bd1TE2771517	Bd21,Bd21-3,Bd30-1,Bd3-1,BdTR12c,Koz-3	Bd1-1
Bd1	24661762	24662613	Bd1TE2772271	Bd21,Bd21-3,Bd30-1,Bd3-1,BdTR12c,Koz-3	Bd1-1
Bd1	24700476	24704841	Bd1TE2748174	Bd21,Bd1-1,Bd30-1,Bd3-1,BdTR12c,Koz-3	Bd21-3
Bd1	24800960	24801021	Bd1TE2787472	Bd21,Bd1-1,Bd30-1,Bd3-1,BdTR12c,Koz-3	Bd21-3
Bd1	24801387	24801537	Bd1TE2754514	Bd21,Bd30-1,Bd3-1,BdTR12c,Koz-3	Bd21-3,Bd1-1
Bd1	24806689	24806782	Bd1TE2784734	Bd21,Bd30-1,Bd3-1,BdTR12c,Koz-3	Bd21-3,Bd1-1
Bd1	24806785	24806876	Bd1TE2762559	Bd21,Bd30-1,Bd3-1,BdTR12c,Koz-3	Bd21-3,Bd1-1
Bd1	24806970	24807077	Bd1TE2783705	Bd21,Bd30-1,Bd3-1,BdTR12c,Koz-3	Bd21-3,Bd1-1
Bd1	24807176	24807318	Bd1TE2781214	Bd21,Bd30-1,Bd3-1,BdTR12c,Koz-3	Bd21-3,Bd1-1
Bd1	24837527	24838856	Bd1TE2771067	Bd21,Bd1-1,Bd21-3,Bd30-1,Bd3-1,BdTR12c	Koz-3
Bd1	24896136	24896262	Bd1TE2755395	Bd21,Bd1-1,Bd30-1,Bd3-1,BdTR12c	Koz-3,Bd21-3
Bd1	24945138	24945312	Bd1TE2779373	Bd21,Bd21-3,Bd30-1,Bd3-1,BdTR12c,Koz-3	Bd1-1
Bd1	25077069	25078141	Bd1TE2771673	Bd21,Bd1-1,Bd21-3,Bd3-1,BdTR12c	Koz-3,Bd30-1
Bd1	25226954	25226999	Bd1TE2762098	BdTR12c	Bd21,Bd1-1,Bd21-3,Bd30-1,Bd3-1,Koz-3
Bd1	25284558	25285902	Bd1TE2770919	Bd21,Bd21-3,Bd30-1,Bd3-1,Koz-3	BdTR12c,Bd1-1
Bd1	25727978	25728057	Bd1TE2764195	Bd21,Bd21-3,Bd30-1,Bd3-1,BdTR12c,Koz-3	Bd1-1
Bd1	25728627	25729530	Bd1TE2771995	Bd21,Bd21-3,Bd30-1,Bd3-1,BdTR12c,Koz-3	Bd1-1
Bd1	25751787	25751908	Bd1TE2755892	Bd21,Bd21-3,Bd30-1,Bd3-1,BdTR12c,Koz-3	Bd1-1
Bd1	26257959	26259890	Bd1TE2771831	Bd21,Bd1-1,Bd30-1,Bd3-1,BdTR12c,Koz-3	Bd21-3
Bd1	26495392	26497116	Bd1TE2770086	Bd21,Bd21-3,Bd30-1,Bd3-1,BdTR12c,Koz-3	Bd1-1
Bd1	26602098	26602537	Bd1TE2774570	Bd21,Bd21-3,Bd30-1,Bd3-1,BdTR12c,Koz-3	Bd1-1
Bd1	26603899	26606682	Bd1TE2748687	Bd21,Bd21-3,Bd30-1,Bd3-1,BdTR12c,Koz-3	Bd1-1
Bd1	26656172	26656759	Bd1TE2773266	Bd21,Bd21-3,Bd30-1,Bd3-1,BdTR12c,Koz-3	Bd1-1
Bd1	26679518	26679803	Bd1TE2776388	Bd21,Bd1-1,Bd30-1,Bd3-1,BdTR12c,Koz-3	Bd21-3
Bd1	26679804	26680223	Bd1TE2774786	Bd21,Bd1-1,Bd30-1,Bd3-1,BdTR12c,Koz-3	Bd21-3
Bd1	26759860	26769180	Bd1TE2747718	Bd21,Bd21-3,Bd30-1,Bd3-1,BdTR12c,Koz-3	Bd1-1
Bd1	26773431	26775706	Bd1TE2769220	Bd21,Bd21-3,Bd30-1,Bd3-1,BdTR12c,Koz-3	Bd1-1
Bd1	26775707	26776511	Bd1TE2772414	Bd21,Bd21-3,Bd30-1,Bd3-1,BdTR12c,Koz-3	Bd1-1
Bd1	26788048	26791127	Bd1TE2748574	Bd21,Bd21-3,BdTR12c,Koz-3	Bd3-1,Bd1-1,Bd30-1
Bd1	26804835	26807930	Bd1TE2748561	Bd21,Bd21-3,Bd3-1,BdTR12c,Koz-3	Bd1-1,Bd30-1
Bd1	26849128	26849487	Bd1TE2751186	Bd21,Bd21-3,Bd3-1,BdTR12c,Koz-3	Bd1-1,Bd30-1
Bd1	27181486	27182821	Bd1TE2771000	Bd21,Bd30-1,Bd3-1,BdTR12c,Koz-3	Bd21-3,Bd1-1
Bd1	27182822	27184688	Bd1TE2769812	Bd21,Bd30-1,Bd3-1,BdTR12c,Koz-3	Bd21-3,Bd1-1
Bd1	27198482	27198735	Bd1TE2777007	Bd21,Bd1-1,Bd21-3,Bd30-1,Bd3-1	Koz-3,BdTR12c
Bd1	27198736	27198806	Bd1TE2786560	Bd21,Bd1-1,Bd21-3,Bd30-1,Bd3-1	Koz-3,BdTR12c
Bd1	27198807	27199214	Bd1TE2774883	Bd21,Bd1-1,Bd21-3,Bd30-1,Bd3-1	Koz-3,BdTR12c
Bd1	27199215	27200133	Bd1TE2772039	Bd21,Bd1-1,Bd21-3,Bd30-1,Bd3-1	Koz-3,BdTR12c
Bd1	27217394	27217441	Bd2TE2722605	Koz-3,BdTR12c,Bd30-1	Bd21,Bd1-1,Bd21-3,Bd3-1
Bd1	27226466	27226704	Bd1TE2752252	Bd21,Bd21-3,Bd30-1,Bd3-1,BdTR12c,Koz-3	Bd1-1
Bd1	27230394	27230452	Bd1TE2771952	Bd21-3	Bd21,Bd1-1,Bd30-1,Bd3-1,BdTR12c,Koz-3
Bd1	27362960	27363024	Bd1TE2787161	Bd21,Bd21-3,Bd30-1,Bd3-1,BdTR12c,Koz-3	Bd1-1
Bd1	27363025	27364315	Bd1TE2771288	Bd21,Bd21-3,Bd30-1,Bd3-1,BdTR12c,Koz-3	Bd1-1
Bd1	27375711	27376479	Bd1TE2772511	Bd21,Bd21-3,Bd30-1,Bd3-1,BdTR12c,Koz-3	Bd1-1
Bd1	27376480	27377241	Bd1TE2750249	Bd21,Bd21-3,Bd30-1,Bd3-1,BdTR12c,Koz-3	Bd1-1
Bd1	27566193	27567017	Bd1TE2772352	Bd21,Bd21-3,Bd30-1,Bd3-1,BdTR12c,Koz-3	Bd1-1
Bd1	27836966	27837852	Bd1TE2772093	Bd21,Bd21-3,Bd30-1,Bd3-1,Koz-3	BdTR12c,Bd1-1
Bd1	28040817	28042141	Bd1TE2771141	Bd21,Bd21-3,Bd30-1,Bd3-1,BdTR12c,Koz-3	Bd1-1
Bd1	28162430	28162572	Bd1TE2749638	Bd1-1	Bd21,Bd21-3,Bd30-1,Bd3-1,BdTR12c,Koz-3
Bd1	28189204	28189271	Bd1TE2765203	Bd21,Bd1-1,Bd30-1,Bd3-1,BdTR12c,Koz-3	Bd21-3
Bd1	28261958	28263285	Bd1TE2771062	Bd21,Bd21-3,Bd30-1,Bd3-1,BdTR12c,Koz-3	Bd1-1
Bd1	28302760	28303031	Bd1TE2776630	Bd21,Bd21-3,Bd30-1,Bd3-1,BdTR12c,Koz-3	Bd1-1
Bd1	28438733	28438857	Bd1TE2782597	Bd21,Bd21-3,Bd30-1,Bd3-1,BdTR12c,Koz-3	Bd1-1
Bd1	28505611	28505673	Bd1TE2787379	Bd21,Bd30-1,Bd3-1,BdTR12c,Koz-3	Bd21-3,Bd1-1
Bd1	28534365	28535751	Bd1TE2770732	Bd21,Bd3-1,BdTR12c	Koz-3,Bd21-3,Bd1-1,Bd30-1
Bd1	28810805	28810998	Bd1TE2753295	Bd21,Bd1-1	Koz-3,Bd3-1,Bd21-3,BdTR12c,Bd30-1
Bd1	28846622	28847170	Bd1TE2750621	Bd21,Bd30-1,Bd3-1,BdTR12c,Koz-3	Bd21-3,Bd1-1
Bd1	28852585	28852955	Bd1TE2775295	Bd21,Bd1-1,Bd30-1,Bd3-1,BdTR12c,Koz-3	Bd21-3
Bd1	29049818	29053501	Bd1TE2748316	Bd21,Bd1-1,Bd3-1	Koz-3,Bd21-3,BdTR12c,Bd30-1
Bd1	29056484	29057204	Bd1TE2772632	Bd21,Bd1-1,Bd21-3,Bd3-1	Koz-3,BdTR12c,Bd30-1
Bd1	29159539	29173630	Bd1TE2747488	Bd21,Bd30-1,BdTR12c,Koz-3	Bd3-1,Bd21-3,Bd1-1
Bd1	29399037	29399087	Bd2TE2698865	Koz-3,BdTR12c,Bd30-1	Bd21,Bd1-1,Bd21-3,Bd3-1
Bd1	29459443	29459825	Bd1TE2775182	Bd21,Bd21-3,Bd30-1,Bd3-1,BdTR12c,Koz-3	Bd1-1
Bd1	29463200	29465951	Bd1TE2768612	Bd21,Bd21-3,Bd30-1,Bd3-1,BdTR12c,Koz-3	Bd1-1
Bd1	29503425	29503764	Bd1TE2775635	Bd21,Bd21-3,Bd30-1,Bd3-1,BdTR12c,Koz-3	Bd1-1
Bd1	29698821	29698895	Bd1TE2764669	Bd21,Bd1-1,Bd30-1,Bd3-1,BdTR12c,Koz-3	Bd21-3
Bd1	29934542	29934592	Bd1TE2756392	BdTR12c	Bd21,Bd1-1,Bd21-3,Bd30-1,Bd3-1,Koz-3
Bd1	30011878	30012113	Bd1TE2752326	Bd21,Bd1-1,Bd21-3,Bd3-1	Koz-3,BdTR12c,Bd30-1
Bd1	30026390	30029731	Bd1TE2767840	Bd21,Bd1-1,Bd21-3,Bd3-1	Koz-3,BdTR12c,Bd30-1
Bd1	30060463	30061217	Bd1TE2772549	Bd21,Bd21-3,Bd30-1,Bd3-1,BdTR12c,Koz-3	Bd1-1
Bd1	30061218	30063846	Bd1TE2768738	Bd21,Bd21-3,Bd30-1,Bd3-1,BdTR12c,Koz-3	Bd1-1
Bd1	30245743	30246567	Bd1TE2772355	Bd21,Bd21-3,Bd30-1,Bd3-1,BdTR12c,Koz-3	Bd1-1
Bd1	30534698	30535151	Bd1TE2774441	Bd21,Bd21-3,Bd30-1,Bd3-1,BdTR12c,Koz-3	Bd1-1
Bd1	30740810	30740912	Bd1TE2760337	Bd21,Bd1-1,Bd21-3,Bd3-1,BdTR12c,Koz-3	Bd30-1
Bd1	30875144	30875899	Bd1TE2772477	Bd21,Bd21-3,Bd30-1,Bd3-1,BdTR12c,Koz-3	Bd1-1
Bd1	30877204	30877288	Bd1TE2785330	Bd21,Bd21-3,Bd30-1,Bd3-1,BdTR12c,Koz-3	Bd1-1
Bd1	30887723	30889074	Bd1TE2770881	Bd21,Bd21-3,Bd30-1,Bd3-1,BdTR12c,Koz-3	Bd1-1
Bd1	30999263	31002759	Bd1TE2748891	Bd21,Bd21-3,Bd30-1,Bd3-1,BdTR12c,Koz-3	Bd1-1
Bd1	30999982	31001233	Bd1TE2771374	Bd21,Bd21-3,Bd30-1,Bd3-1,BdTR12c,Koz-3	Bd1-1
Bd1	31014344	31014395	Bd1TE2772037	Bd1-1	Bd21,Bd21-3,Bd30-1,Bd3-1,BdTR12c,Koz-3
Bd1	31157995	31158044	Bd3TE2709561	BdTR12c	Bd21,Bd1-1,Bd21-3,Bd30-1,Bd3-1,Koz-3
Bd1	31191143	31191235	Bd4TE2678091	Koz-3,Bd21-3	Bd21,Bd1-1,Bd30-1,Bd3-1,BdTR12c
Bd1	31191151	31191240	Bd1TE2771762	Bd1-1	Bd21,Bd21-3,Bd30-1,Bd3-1,BdTR12c,Koz-3
Bd1	31194279	31194320	Bd2TE2703854	Koz-3	Bd21,Bd1-1,Bd21-3,Bd30-1,Bd3-1,BdTR12c
Bd1	31309260	31313020	Bd1TE2748298	Bd21,Bd30-1,Bd3-1,BdTR12c,Koz-3	Bd21-3,Bd1-1
Bd1	31380353	31384234	Bd1TE2748265	Bd21,Bd1-1,Bd30-1,Bd3-1,BdTR12c,Koz-3	Bd21-3
Bd1	31459836	31460990	Bd1TE2749709	Bd21,Bd21-3,Bd30-1,Bd3-1,BdTR12c,Koz-3	Bd1-1
Bd1	31471005	31471275	Bd1TE2751741	Bd21,Bd21-3,Bd30-1,Bd3-1,BdTR12c,Koz-3	Bd1-1
Bd1	31669623	31669842	Bd1TE2752640	Bd21,Bd21-3,Bd30-1,Bd3-1,BdTR12c,Koz-3	Bd1-1
Bd1	31708455	31712888	Bd1TE2748168	Bd21,Bd1-1,Bd30-1,Bd3-1,BdTR12c,Koz-3	Bd21-3
Bd1	31712978	31713115	Bd1TE2781487	Bd21,Bd1-1,Bd30-1,Bd3-1,BdTR12c,Koz-3	Bd21-3
Bd1	31713003	31713090	Bd1TE2762966	Bd21,Bd1-1,Bd30-1,Bd3-1,BdTR12c,Koz-3	Bd21-3
Bd1	31907474	31907555	Bd4TE2672021,Bd4TE2680018	Bd1-1	Bd21,Bd21-3,Bd30-1,Bd3-1,BdTR12c,Koz-3
Bd1	32074629	32078050	Bd1TE2748425	Bd21,Bd21-3,Bd30-1,Bd3-1,BdTR12c,Koz-3	Bd1-1
Bd1	32078178	32078244	Bd1TE2786973	Bd21,Bd21-3,Bd30-1,Bd3-1,BdTR12c,Koz-3	Bd1-1
Bd1	32346608	32354537	Bd1TE2747775	Bd21,Bd1-1,Bd21-3,Bd30-1,Bd3-1,BdTR12c	Koz-3
Bd1	32354538	32355471	Bd1TE2772005	Bd21,Bd1-1,Bd21-3,Bd30-1,Bd3-1,BdTR12c	Koz-3
Bd1	32355472	32355536	Bd1TE2787147	Bd21,Bd1-1,Bd21-3,Bd30-1,Bd3-1,BdTR12c	Koz-3
Bd1	32369353	32370275	Bd1TE2772030	Bd21,Bd21-3,Bd30-1,Bd3-1,BdTR12c,Koz-3	Bd1-1
Bd1	32445319	32445418	Bd1TE2784236	Bd21,Bd21-3,Bd30-1,Bd3-1,BdTR12c,Koz-3	Bd1-1
Bd1	32448214	32449238	Bd1TE2771760	Bd21,Bd21-3,Bd30-1,Bd3-1,BdTR12c,Koz-3	Bd1-1
Bd1	32449239	32449782	Bd1TE2773541	Bd21,Bd21-3,Bd30-1,Bd3-1,BdTR12c,Koz-3	Bd1-1
Bd1	32449783	32452042	Bd1TE2769239	Bd21,Bd21-3,Bd30-1,Bd3-1,BdTR12c,Koz-3	Bd1-1
Bd1	32461383	32465345	Bd1TE2767418	Bd21,Bd1-1,Bd30-1,Bd3-1,BdTR12c,Koz-3	Bd21-3
Bd1	32478143	32482326	Bd1TE2748206	Bd21,Bd1-1,Bd30-1,Bd3-1,BdTR12c,Koz-3	Bd21-3
Bd1	32521845	32524343	Bd1TE2768903	Bd21,Bd1-1,Bd21-3,Bd30-1,Bd3-1	Koz-3,BdTR12c
Bd1	32544466	32547840	Bd1TE2748451	Bd21,Bd21-3,Bd30-1,Bd3-1,BdTR12c,Koz-3	Bd1-1
Bd1	32567448	32571843	Bd1TE2776594	Bd21,Bd1-1,Bd30-1,Bd3-1,BdTR12c,Koz-3	Bd21-3
Bd1	32567659	32569533	Bd1TE2769793	Bd21,Bd1-1,Bd30-1,Bd3-1,BdTR12c,Koz-3	Bd21-3
Bd1	32569534	32571512	Bd1TE2769641	Bd21,Bd30-1,Bd3-1,BdTR12c,Koz-3	Bd21-3,Bd1-1
Bd1	32571844	32572250	Bd1TE2774899	Bd21,Bd1-1,Bd30-1,Bd3-1,BdTR12c,Koz-3	Bd21-3
Bd1	32677765	32679117	Bd1TE2770869	Bd21,Bd21-3,Bd30-1,Bd3-1,BdTR12c,Koz-3	Bd1-1
Bd1	32683270	32683541	Bd1TE2751734	Bd21,Bd21-3,Bd30-1,Bd3-1,BdTR12c,Koz-3	Bd1-1
Bd1	32709977	32713749	Bd1TE2748293	Bd21,Bd1-1,Bd30-1,Bd3-1,BdTR12c,Koz-3	Bd21-3
Bd1	32714665	32715561	Bd1TE2750027	Bd21,Bd1-1,Bd30-1,Bd3-1,BdTR12c,Koz-3	Bd21-3
Bd1	32718173	32719192	Bd1TE2771769	Bd21,Bd1-1,Bd30-1,Bd3-1,BdTR12c,Koz-3	Bd21-3
Bd1	32911740	32911780	Bd1TE2784768	Bd21-3	Bd21,Bd1-1,Bd30-1,Bd3-1,BdTR12c,Koz-3
Bd1	32946487	32948474	Bd1TE2769621	Bd21,Bd1-1,Bd21-3,Bd30-1,Bd3-1,Koz-3	BdTR12c
Bd1	32961621	32974527	Bd1TE2766388	Bd21,Bd1-1,Koz-3	Bd3-1,Bd21-3,BdTR12c,Bd30-1
Bd1	32961750	32962444	Bd1TE2750348	Bd21,Koz-3	Bd3-1,Bd21-3,Bd1-1,BdTR12c,Bd30-1
Bd1	32962507	32962636	Bd1TE2782246	Bd21,Koz-3	Bd3-1,Bd21-3,Bd1-1,BdTR12c,Bd30-1
Bd1	32962637	32965214	Bd1TE2768797	Bd21,Koz-3	Bd3-1,Bd21-3,Bd1-1,BdTR12c,Bd30-1
Bd1	32965296	32967908	Bd1TE2748742	Bd21,Koz-3	Bd3-1,Bd21-3,Bd1-1,BdTR12c,Bd30-1
Bd1	32974528	32975471	Bd1TE2771980	Bd21,Bd1-1,Koz-3	Bd3-1,Bd21-3,BdTR12c,Bd30-1
Bd1	32975472	32975728	Bd1TE2776953	Bd21,Bd1-1,Koz-3	Bd3-1,Bd21-3,BdTR12c,Bd30-1
Bd1	33097995	33098452	Bd1TE2750904	Bd21,Bd3-1,BdTR12c,Koz-3	Bd21-3,Bd1-1,Bd30-1
Bd1	33114875	33122538	Bd1TE2766204	Bd21,Bd21-3,Bd3-1,BdTR12c,Koz-3	Bd1-1,Bd30-1
Bd1	33122544	33123419	Bd1TE2772186	Bd21,Bd21-3,Bd3-1,BdTR12c,Koz-3	Bd1-1,Bd30-1
Bd1	33130760	33130879	Bd1TE2756082	Bd21,Bd21-3,Bd30-1,Bd3-1,BdTR12c,Koz-3	Bd1-1
Bd1	33171553	33172601	Bd1TE2771706	Bd21,Bd1-1,Bd21-3,Bd30-1,Bd3-1	Koz-3,BdTR12c
Bd1	33206497	33210437	Bd1TE2748251	Bd21,Bd30-1,Bd3-1,BdTR12c,Koz-3	Bd21-3,Bd1-1
Bd1	33261109	33261153	Bd4TE2677357	Bd21-3	Bd21,Bd1-1,Bd30-1,Bd3-1,BdTR12c,Koz-3
Bd1	33283701	33284484	Bd1TE2750205	Bd21,Bd30-1,Bd3-1,BdTR12c,Koz-3	Bd21-3,Bd1-1
Bd1	33373453	33374779	Bd1TE2771104	Bd21,Bd21-3,Bd3-1,BdTR12c	Koz-3,Bd1-1,Bd30-1
Bd1	33421988	33426902	Bd1TE2748089	Bd21,Bd3-1,BdTR12c	Koz-3,Bd21-3,Bd1-1,Bd30-1
Bd1	33825158	33829311	Bd1TE2767923	Bd21,Bd30-1,Bd3-1,BdTR12c,Koz-3	Bd21-3,Bd1-1
Bd1	33854514	33855042	Bd1TE2773655	Bd21,Bd1-1,Bd21-3,Bd3-1,BdTR12c,Koz-3	Bd30-1
Bd1	33995102	33998492	Bd1TE2748447	Bd21,Bd1-1,Bd30-1,Bd3-1,BdTR12c,Koz-3	Bd21-3
Bd1	34045002	34048918	Bd1TE2748261	Bd21,Bd30-1,Bd3-1,BdTR12c,Koz-3	Bd21-3,Bd1-1
Bd1	34159090	34160020	Bd1TE2772012	Bd21,Bd21-3,Bd30-1,Bd3-1,BdTR12c,Koz-3	Bd1-1
Bd1	34163307	34164731	Bd1TE2749434	Bd21,Bd1-1,Bd30-1,Bd3-1,BdTR12c,Koz-3	Bd21-3
Bd1	34164954	34165031	Bd1TE2786005	Bd21,Bd21-3,Bd30-1,Bd3-1,BdTR12c,Koz-3	Bd1-1
Bd1	34165684	34166445	Bd1TE2772536	Bd21,Bd21-3,Bd30-1,Bd3-1,BdTR12c,Koz-3	Bd1-1
Bd1	34171111	34177419	Bd1TE2766478	Bd21,Bd21-3,Bd30-1,Bd3-1,BdTR12c	Koz-3,Bd1-1
Bd1	34177420	34177484	Bd1TE2787210	Bd21,Bd21-3,Bd30-1,Bd3-1,BdTR12c	Koz-3,Bd1-1
Bd1	34177485	34177716	Bd1TE2777470	Bd21,Bd21-3,Bd30-1,Bd3-1,BdTR12c	Koz-3,Bd1-1
Bd1	34222417	34222502	Bd1TE2763217	Bd21,Bd1-1,Bd30-1,Bd3-1,BdTR12c,Koz-3	Bd21-3
Bd1	34222529	34226641	Bd1TE2748220	Bd21,Bd1-1,Bd30-1,Bd3-1,BdTR12c,Koz-3	Bd21-3
Bd1	34269512	34269582	Bd5TE2644982	Koz-3	Bd21,Bd1-1,Bd21-3,Bd30-1,Bd3-1,BdTR12c
Bd1	34277305	34280932	Bd1TE2748342	Bd21,Bd1-1,Bd30-1,Bd3-1,BdTR12c,Koz-3	Bd21-3
Bd1	34281923	34283252	Bd1TE2771055	Bd21,Bd21-3,Bd30-1,Bd3-1,BdTR12c	Koz-3,Bd1-1
Bd1	34301461	34301568	Bd1TE2783692	Bd21,Bd21-3,Bd30-1,Bd3-1,BdTR12c,Koz-3	Bd1-1
Bd1	34318752	34322625	Bd1TE2748273	Bd21,Bd30-1,Bd3-1,BdTR12c,Koz-3	Bd21-3,Bd1-1
Bd1	34420466	34425014	Bd1TE2748147	Bd21,Bd1-1,Bd30-1,Bd3-1,BdTR12c,Koz-3	Bd21-3
Bd1	34432094	34436325	Bd1TE2767282	Bd21,Bd1-1,Bd30-1,Bd3-1,BdTR12c,Koz-3	Bd21-3
Bd1	34528976	34529578	Bd1TE2773168	Bd21,Bd21-3,Bd30-1,Bd3-1,BdTR12c,Koz-3	Bd1-1
Bd1	34589977	34590180	Bd1TE2778147	Bd21,Bd21-3,Bd30-1,Bd3-1,BdTR12c,Koz-3	Bd1-1
Bd1	34637751	34641477	Bd1TE2767557	Bd21,Bd30-1,Bd3-1,BdTR12c,Koz-3	Bd21-3,Bd1-1
Bd1	34641893	34642074	Bd1TE2753610	Bd21,Bd1-1,Bd30-1,Bd3-1,BdTR12c,Koz-3	Bd21-3
Bd1	34808848	34823153	Bd1TE2765864	Bd21,Bd21-3,Bd30-1,Bd3-1,BdTR12c,Koz-3	Bd1-1
Bd1	34943350	34943497	Bd1TE2780916	Bd21,Bd1-1,Koz-3	Bd3-1,Bd21-3,BdTR12c,Bd30-1
Bd1	35060432	35064216	Bd1TE2767529	Bd21,Bd21-3,Bd30-1,Bd3-1,BdTR12c,Koz-3	Bd1-1
Bd1	35065771	35067484	Bd1TE2770145	Bd21,Bd21-3,Bd3-1,BdTR12c,Koz-3	Bd1-1,Bd30-1
Bd1	35083955	35087397	Bd1TE2748408	Bd21,Bd1-1,Bd30-1,Bd3-1,BdTR12c,Koz-3	Bd21-3
Bd1	35155140	35156389	Bd1TE2771390	Bd21,Bd21-3,Bd30-1,Bd3-1,BdTR12c,Koz-3	Bd1-1
Bd1	35156390	35158977	Bd1TE2768781	Bd21,Bd21-3,Bd30-1,Bd3-1,BdTR12c,Koz-3	Bd1-1
Bd1	35283807	35283855	Bd1TE2771045	BdTR12c	Bd21,Bd1-1,Bd21-3,Bd30-1,Bd3-1,Koz-3
Bd1	35316127	35316189	Bd1TE2787369	Bd21,Bd1-1,Bd21-3,Bd30-1,Bd3-1,BdTR12c	Koz-3
Bd1	35329926	35329981	Bd1TE2768669	Bd1-1	Bd21,Bd21-3,Bd30-1,Bd3-1,BdTR12c,Koz-3
Bd1	35457840	35459228	Bd1TE2770726	Bd21,Bd21-3,Bd30-1,Bd3-1,BdTR12c,Koz-3	Bd1-1
Bd1	35459282	35462171	Bd1TE2768465	Bd21,Bd21-3,Bd30-1,Bd3-1,BdTR12c,Koz-3	Bd1-1
Bd1	35462172	35462993	Bd1TE2772365	Bd21,Bd21-3,Bd30-1,Bd3-1,BdTR12c,Koz-3	Bd1-1
Bd1	35463048	35463226	Bd1TE2779174	Bd21,Bd21-3,Bd30-1,Bd3-1,BdTR12c,Koz-3	Bd1-1
Bd1	35497121	35500719	Bd1TE2767628	Bd21,Bd21-3,Bd30-1,Bd3-1,BdTR12c,Koz-3	Bd1-1
Bd1	35500720	35500786	Bd1TE2786121	Bd21,Bd21-3,Bd30-1,Bd3-1,BdTR12c,Koz-3	Bd1-1
Bd1	35563791	35566708	Bd1TE2768435	Bd21,Bd21-3,Bd30-1,Bd3-1,BdTR12c,Koz-3	Bd1-1
Bd1	35579665	35579712	Bd1TE2747643,Bd1TE2772121	BdTR12c	Bd21,Bd1-1,Bd21-3,Bd30-1,Bd3-1,Koz-3
Bd1	35595181	35596300	Bd1TE2771605	Bd21,Bd1-1,Bd21-3,Bd30-1,Bd3-1,Koz-3	BdTR12c
Bd1	35850903	35855068	Bd1TE2748214	Bd21,Bd21-3,Bd30-1,Bd3-1,BdTR12c,Koz-3	Bd1-1
Bd1	35925883	35926902	Bd1TE2771770	Bd21,Bd21-3,Bd30-1,Bd3-1,BdTR12c,Koz-3	Bd1-1
Bd1	35926920	35927180	Bd1TE2776867	Bd21,Bd21-3,Bd30-1,Bd3-1,BdTR12c,Koz-3	Bd1-1
Bd1	35927181	35928528	Bd1TE2770899	Bd21,Bd21-3,Bd30-1,Bd3-1,BdTR12c,Koz-3	Bd1-1
Bd1	35930647	35931909	Bd1TE2771366	Bd21,Bd21-3,Bd30-1,Bd3-1,BdTR12c,Koz-3	Bd1-1
Bd1	36108363	36108412	Bd1TE2765970,Bd1TE2770881	Bd1-1	Bd21,Bd21-3,Bd30-1,Bd3-1,BdTR12c,Koz-3
Bd1	36195587	36195669	Bd1TE2785491	Bd21,Bd21-3,Bd30-1,Bd3-1,BdTR12c,Koz-3	Bd1-1
Bd1	36331716	36331791	Bd1TE2786100	Bd21,Bd1-1,Bd30-1,Bd3-1	Koz-3,Bd21-3,BdTR12c
Bd1	36340348	36341260	Bd1TE2772055	Bd21,Bd30-1,Bd3-1,BdTR12c,Koz-3	Bd21-3,Bd1-1
Bd1	36346121	36347134	Bd1TE2771790	Bd21,Bd1-1,Bd21-3,Bd30-1,Bd3-1	Koz-3,BdTR12c
Bd1	36347135	36347624	Bd1TE2774058	Bd21,Bd1-1,Bd21-3,Bd30-1,Bd3-1	Koz-3,BdTR12c
Bd1	36738930	36739055	Bd1TE2782531	Bd21,Bd1-1,Bd21-3,Bd3-1,BdTR12c,Koz-3	Bd30-1
Bd1	36784997	36785276	Bd1TE2776497	Bd21,Bd1-1,Bd21-3,Bd30-1,Bd3-1,BdTR12c	Koz-3
Bd1	36866916	36867199	Bd1TE2776432	Bd21,Bd21-3,Bd30-1,Bd3-1,BdTR12c,Koz-3	Bd1-1
Bd1	36872367	36872447	Bd1TE2785734	Bd21,Bd21-3,Bd30-1,Bd3-1,Koz-3	BdTR12c,Bd1-1
Bd1	36873391	36873466	Bd1TE2786125	Bd21,Bd21-3,Bd30-1,Bd3-1,Koz-3	BdTR12c,Bd1-1
Bd1	36873470	36874658	Bd1TE2771505	Bd21,Bd21-3,Bd30-1,Bd3-1,BdTR12c,Koz-3	Bd1-1
Bd1	36883631	36883760	Bd1TE2782240	Bd21,Bd21-3,Bd30-1,Bd3-1,BdTR12c,Koz-3	Bd1-1
Bd1	36889093	36889155	Bd2TE2693863,Bd2TE2710262	Bd1-1	Bd21,Bd21-3,Bd30-1,Bd3-1,BdTR12c,Koz-3
Bd1	36992860	36993115	Bd1TE2776977	Bd21,Bd21-3,Bd30-1,Bd3-1,BdTR12c,Koz-3	Bd1-1
Bd1	37036981	37038104	Bd1TE2771600	Bd21,Bd21-3,Bd30-1,Bd3-1,BdTR12c,Koz-3	Bd1-1
Bd1	37038105	37041441	Bd1TE2769047	Bd21,Bd21-3,Bd30-1,Bd3-1,BdTR12c,Koz-3	Bd1-1
Bd1	37039074	37040029	Bd1TE2771951	Bd21,Bd21-3,Bd30-1,Bd3-1,BdTR12c,Koz-3	Bd1-1
Bd1	37042744	37044076	Bd1TE2771021	Bd21,Bd21-3,Bd30-1,Bd3-1,BdTR12c,Koz-3	Bd1-1
Bd1	37044077	37045040	Bd1TE2771931	Bd21,Bd21-3,Bd30-1,Bd3-1,BdTR12c,Koz-3	Bd1-1
Bd1	37045041	37047659	Bd1TE2768755	Bd21,Bd21-3,Bd30-1,Bd3-1,BdTR12c,Koz-3	Bd1-1
Bd1	37047984	37048390	Bd1TE2774893	Bd21,Bd21-3,Bd30-1,Bd3-1,BdTR12c,Koz-3	Bd1-1
Bd1	37076387	37077395	Bd1TE2771812	Bd21,Bd21-3,Bd30-1,Bd3-1,BdTR12c,Koz-3	Bd1-1
Bd1	37132008	37134704	Bd1TE2768661	Bd21,Bd21-3,Bd30-1,Bd3-1,BdTR12c,Koz-3	Bd1-1
Bd1	37135606	37135650	Bd3TE2704669	BdTR12c	Bd21,Bd1-1,Bd21-3,Bd30-1,Bd3-1,Koz-3
Bd1	37268380	37271979	Bd1TE2767634	Bd21,Bd1-1,Bd21-3,Bd30-1,Bd3-1,Koz-3	BdTR12c
Bd1	37283292	37283469	Bd1TE2779196	Bd21,Bd21-3,Bd3-1,Koz-3	BdTR12c,Bd1-1,Bd30-1
Bd1	37334404	37335054	Bd1TE2772914	Bd21,Bd21-3,Bd30-1,Bd3-1,BdTR12c,Koz-3	Bd1-1
Bd1	37335055	37335809	Bd1TE2772550	Bd21,Bd21-3,Bd30-1,Bd3-1,BdTR12c,Koz-3	Bd1-1
Bd1	37335810	37335972	Bd1TE2780073	Bd21,Bd21-3,Bd30-1,Bd3-1,BdTR12c,Koz-3	Bd1-1
Bd1	37335973	37336970	Bd1TE2771848	Bd21,Bd21-3,Bd30-1,Bd3-1,BdTR12c,Koz-3	Bd1-1
Bd1	37387318	37395624	Bd1TE2766134	Bd21,Bd1-1,Bd30-1,Bd3-1,BdTR12c,Koz-3	Bd21-3
Bd1	37527626	37528089	Bd1TE2774345	Bd21,Bd1-1,Bd30-1,Bd3-1,BdTR12c,Koz-3	Bd21-3
Bd1	37528318	37532036	Bd1TE2767559	Bd21,Bd1-1,Bd30-1,Bd3-1,BdTR12c,Koz-3	Bd21-3
Bd1	37606001	37609289	Bd1TE2767966	Bd21,Bd1-1,Bd21-3,Bd3-1,BdTR12c,Koz-3	Bd30-1
Bd1	37679501	37679772	Bd1TE2751737	Bd21,Bd21-3,Bd30-1,Bd3-1,BdTR12c,Koz-3	Bd1-1
Bd1	37817258	37818214	Bd1TE2771946	Bd21,Bd21-3,Bd30-1,Bd3-1,BdTR12c,Koz-3	Bd1-1
Bd1	37830345	37831376	Bd1TE2771746	Bd21,Bd1-1,Bd21-3,Bd3-1,BdTR12c,Koz-3	Bd30-1
Bd1	37851449	37852412	Bd1TE2771932	Bd21,Bd1-1,Bd21-3,Bd30-1,Bd3-1,Koz-3	BdTR12c
Bd1	37922632	37923246	Bd1TE2773119	Bd21,Bd21-3,Bd30-1,Bd3-1	Koz-3,BdTR12c,Bd1-1
Bd1	37924205	37924638	Bd1TE2774652	Bd21,Bd21-3,Bd3-1,Koz-3	BdTR12c,Bd1-1,Bd30-1
Bd1	37967025	37969336	Bd1TE2769171	Bd21,Bd1-1,Bd30-1,Bd3-1,BdTR12c,Koz-3	Bd21-3
Bd1	37980425	37981001	Bd1TE2773326	Bd21,Bd30-1,Bd3-1,BdTR12c,Koz-3	Bd21-3,Bd1-1
Bd1	37982733	37984061	Bd1TE2771079	Bd21,Bd30-1,Bd3-1,BdTR12c,Koz-3	Bd21-3,Bd1-1
Bd1	37984080	37984519	Bd1TE2774588	Bd21,Bd21-3,Bd30-1,Bd3-1,BdTR12c,Koz-3	Bd1-1
Bd1	37984520	37986689	Bd1TE2769365	Bd21,Bd21-3,Bd30-1,Bd3-1,BdTR12c,Koz-3	Bd1-1
Bd1	38014156	38014202	Bd4TE2678234,Bd4TE2680127,Bd4TE2678863	Bd30-1	Bd21,Bd1-1,Bd21-3,Bd3-1,BdTR12c,Koz-3
Bd1	38015401	38016914	Bd1TE2770522	Bd21,Bd21-3,Bd30-1,Bd3-1,BdTR12c,Koz-3	Bd1-1
Bd1	38031260	38031314	Bd3TE2690429	Bd1-1	Bd21,Bd21-3,Bd30-1,Bd3-1,BdTR12c,Koz-3
Bd1	38175982	38176087	Bd1TE2783834	Bd21,Bd21-3,Bd30-1,Bd3-1,BdTR12c,Koz-3	Bd1-1
Bd1	38176088	38176225	Bd1TE2781518	Bd21,Bd21-3,Bd30-1,Bd3-1,BdTR12c,Koz-3	Bd1-1
Bd1	38180663	38181674	Bd1TE2771774	Bd21,Bd21-3,Bd30-1,Bd3-1,BdTR12c,Koz-3	Bd1-1
Bd1	38200226	38200697	Bd1TE2774262	Bd21,Bd1-1,Bd30-1,Bd3-1,BdTR12c,Koz-3	Bd21-3
Bd1	38200698	38200810	Bd1TE2758679	Bd21,Bd1-1,Bd30-1,Bd3-1,BdTR12c,Koz-3	Bd21-3
Bd1	38286576	38286860	Bd1TE2776402	Bd21,Bd21-3,Bd30-1,Bd3-1,BdTR12c,Koz-3	Bd1-1
Bd1	38289238	38289693	Bd1TE2774050	Bd21,Bd21-3,Bd30-1,Bd3-1,BdTR12c,Koz-3	Bd1-1
Bd1	38322396	38322473	Bd1TE2777173,Bd1TE2769759	Bd1-1	Bd21,Bd21-3,Bd30-1,Bd3-1,BdTR12c,Koz-3
Bd1	38325283	38326324	Bd1TE2771726	Bd21,Bd21-3,Bd30-1,Bd3-1,BdTR12c,Koz-3	Bd1-1
Bd1	38345625	38345680	Bd1TE2767541	Bd1-1	Bd21,Bd21-3,Bd30-1,Bd3-1,BdTR12c,Koz-3
Bd1	38365340	38366669	Bd1TE2771053	Bd21,Bd21-3,Bd30-1,Bd3-1,BdTR12c,Koz-3	Bd1-1
Bd1	38425310	38429019	Bd1TE2767692	Bd21,Bd30-1,Bd3-1,BdTR12c,Koz-3	Bd21-3,Bd1-1
Bd1	38518673	38518786	Bd1TE2783342	Bd21,Bd1-1,Bd30-1,Bd3-1,BdTR12c,Koz-3	Bd21-3
Bd1	38526133	38531060	Bd1TE2766937	Bd21,Bd21-3,Bd30-1,Bd3-1,BdTR12c,Koz-3	Bd1-1
Bd1	38531061	38531132	Bd1TE2786431	Bd21,Bd30-1,Bd3-1,BdTR12c,Koz-3	Bd21-3,Bd1-1
Bd1	38595230	38599022	Bd1TE2767525	Bd21,Bd21-3,Bd30-1,Bd3-1,BdTR12c,Koz-3	Bd1-1
Bd1	38666854	38668132	Bd1TE2771334	Bd21,Bd21-3,Bd30-1,Bd3-1,BdTR12c,Koz-3	Bd1-1
Bd1	38734973	38738707	Bd1TE2767550	Bd21,Bd30-1,Bd3-1,BdTR12c,Koz-3	Bd21-3,Bd1-1
Bd1	38842101	38842341	Bd1TE2752140	Bd21,Bd1-1,Bd21-3,Bd30-1,Bd3-1,Koz-3	BdTR12c
Bd1	38953894	38954216	Bd1TE2775855	Bd21,Bd30-1,Bd3-1,BdTR12c,Koz-3	Bd21-3,Bd1-1
Bd1	38954562	38956517	Bd1TE2769678	Bd21,Bd30-1,Bd3-1,BdTR12c,Koz-3	Bd21-3,Bd1-1
Bd1	38988314	38988415	Bd1TE2784067	Bd21,Bd21-3,Bd30-1,Bd3-1,BdTR12c,Koz-3	Bd1-1
Bd1	39055444	39055490	Bd2TE2710207	Bd1-1	Bd21,Bd21-3,Bd30-1,Bd3-1,BdTR12c,Koz-3
Bd1	39063400	39063822	Bd1TE2774748	Bd21,Bd21-3,Bd30-1,Bd3-1,BdTR12c,Koz-3	Bd1-1
Bd1	39063823	39065212	Bd1TE2770722	Bd21,Bd21-3,Bd30-1,Bd3-1,BdTR12c,Koz-3	Bd1-1
Bd1	39065213	39066182	Bd1TE2771914	Bd21,Bd21-3,Bd30-1,Bd3-1,BdTR12c,Koz-3	Bd1-1
Bd1	39068565	39068674	Bd1TE2783566	Bd21,Bd21-3,Bd30-1,Bd3-1,BdTR12c,Koz-3	Bd1-1
Bd1	39070288	39071014	Bd1TE2772618	Bd21,Bd21-3,Bd30-1,Bd3-1,BdTR12c,Koz-3	Bd1-1
Bd1	39077655	39078081	Bd1TE2774711	Bd21,Bd21-3,Bd30-1,Bd3-1,BdTR12c,Koz-3	Bd1-1
Bd1	39092059	39092774	Bd1TE2772652	Bd21,Bd30-1,Bd3-1,BdTR12c,Koz-3	Bd21-3,Bd1-1
Bd1	39156188	39157210	Bd1TE2771763	Bd21,Bd21-3,Bd30-1,Bd3-1,BdTR12c,Koz-3	Bd1-1
Bd1	39176984	39177025	Bd3TE2690190	BdTR12c	Bd21,Bd1-1,Bd21-3,Bd30-1,Bd3-1,Koz-3
Bd1	39210070	39212483	Bd1TE2769012	Bd21,Bd21-3,Bd30-1,Bd3-1,BdTR12c,Koz-3	Bd1-1
Bd1	39324073	39324135	Bd1TE2787393	Bd21,Bd1-1,Bd30-1,Bd3-1,BdTR12c,Koz-3	Bd21-3
Bd1	39324342	39327498	Bd1TE2768156	Bd21,Bd1-1,Bd30-1,Bd3-1,BdTR12c,Koz-3	Bd21-3
Bd1	39404639	39405682	Bd1TE2771714	Bd21,Bd1-1,Koz-3	Bd3-1,Bd21-3,BdTR12c,Bd30-1
Bd1	39434058	39435384	Bd1TE2771097	Bd21,Bd21-3,Bd30-1,Bd3-1,BdTR12c,Koz-3	Bd1-1
Bd1	39486712	39488424	Bd1TE2770159	Bd21,Bd1-1,Bd21-3,Bd3-1,BdTR12c,Koz-3	Bd30-1
Bd1	39558723	39560438	Bd1TE2770132	Bd21,Bd21-3,Bd30-1,Bd3-1,BdTR12c,Koz-3	Bd1-1
Bd1	39560439	39561568	Bd1TE2771588	Bd21,Bd30-1,Bd3-1,BdTR12c,Koz-3	Bd21-3,Bd1-1
Bd1	39563081	39565654	Bd1TE2768800	Bd21,Bd21-3,Bd30-1,Bd3-1,BdTR12c,Koz-3	Bd1-1
Bd1	39616351	39617713	Bd1TE2770800	Bd21,Bd21-3,Koz-3	Bd3-1,BdTR12c,Bd1-1,Bd30-1
Bd1	39686484	39686587	Bd1TE2783967	Bd21,Bd21-3,Bd30-1,Bd3-1,BdTR12c,Koz-3	Bd1-1
Bd1	39686926	39688999	Bd1TE2769493	Bd21,Bd21-3,Bd30-1,Bd3-1,BdTR12c,Koz-3	Bd1-1
Bd1	39689000	39690703	Bd1TE2770184	Bd21,Bd21-3,Bd30-1,Bd3-1,BdTR12c,Koz-3	Bd1-1
Bd1	39692407	39692654	Bd1TE2777147	Bd21,Bd21-3,Bd30-1,Bd3-1,BdTR12c,Koz-3	Bd1-1
Bd1	39709145	39711065	Bd1TE2769732	Bd21,Bd1-1,Bd21-3,Bd30-1,BdTR12c,Koz-3	Bd3-1
Bd1	39753259	39754271	Bd1TE2771795	Bd21,Bd21-3,Bd30-1,Bd3-1,BdTR12c,Koz-3	Bd1-1
Bd1	39908874	39909106	Bd1TE2775694	Bd21,Bd1-1,Bd30-1,Bd3-1,BdTR12c,Koz-3	Bd21-3
Bd1	39941095	39943007	Bd1TE2769746	Bd21,Bd21-3,Bd30-1,Bd3-1,BdTR12c,Koz-3	Bd1-1
Bd1	40147361	40155765	Bd1TE2775075	Bd21,Bd1-1,Bd30-1,Bd3-1,BdTR12c,Koz-3	Bd21-3
Bd1	40147492	40153907	Bd1TE2766436	Bd21,Bd1-1,Koz-3	Bd3-1,Bd21-3,BdTR12c,Bd30-1
Bd1	40153908	40154263	Bd1TE2775466	Bd21,Koz-3	Bd3-1,Bd21-3,Bd1-1,BdTR12c,Bd30-1
Bd1	40154264	40155331	Bd1TE2771681	Bd21,Koz-3	Bd3-1,Bd21-3,Bd1-1,BdTR12c,Bd30-1
Bd1	40155332	40155501	Bd1TE2779638	Bd21,Bd1-1,Koz-3	Bd3-1,Bd21-3,BdTR12c,Bd30-1
Bd1	40165156	40165253	Bd1TE2784401	Bd21,Bd21-3,Bd30-1,Bd3-1,BdTR12c,Koz-3	Bd1-1
Bd1	40165323	40168883	Bd1TE2767656	Bd21,Bd21-3,Bd30-1,Bd3-1,BdTR12c,Koz-3	Bd1-1
Bd1	40168884	40169470	Bd1TE2773281	Bd21,Bd30-1,Bd3-1,Koz-3	Bd21-3,Bd1-1,BdTR12c
Bd1	40169471	40170480	Bd1TE2771804	Bd21,Bd30-1,Bd3-1,Koz-3	Bd21-3,Bd1-1,BdTR12c
Bd1	40170481	40171242	Bd1TE2772534	Bd21,Bd30-1,Bd3-1,Koz-3	Bd21-3,Bd1-1,BdTR12c
Bd1	40280936	40281888	Bd1TE2771958	Bd21,Bd1-1,Koz-3	Bd3-1,Bd21-3,BdTR12c,Bd30-1
Bd1	40305472	40305552	Bd1TE2785656	Bd21,Bd21-3,Bd30-1,Bd3-1,BdTR12c,Koz-3	Bd1-1
Bd1	40310779	40314791	Bd1TE2748237	Bd21,Bd1-1,Bd30-1,Bd3-1,BdTR12c,Koz-3	Bd21-3
Bd1	40324341	40324732	Bd1TE2775089	Bd21,Bd1-1,Bd3-1,BdTR12c,Koz-3	Bd21-3,Bd30-1
Bd1	40357619	40359334	Bd1TE2770127	Bd21,Bd21-3,Bd30-1,Bd3-1,BdTR12c,Koz-3	Bd1-1
Bd1	40614981	40615153	Bd1TE2753819	Bd21,Bd21-3,Bd30-1,Bd3-1,BdTR12c,Koz-3	Bd1-1
Bd1	40615274	40617054	Bd1TE2749198	Bd21,Bd21-3,Bd30-1,Bd3-1,BdTR12c,Koz-3	Bd1-1
Bd1	40617387	40623394	Bd1TE2747929	Bd21,Bd21-3,Bd30-1,Bd3-1,BdTR12c,Koz-3	Bd1-1
Bd1	40623433	40623601	Bd1TE2753947	Bd21,Bd21-3,Bd30-1,Bd3-1,BdTR12c,Koz-3	Bd1-1
Bd1	40708613	40709956	Bd1TE2770924	Bd21,Bd21-3,Bd30-1,Bd3-1,BdTR12c,Koz-3	Bd1-1
Bd1	40736072	40736968	Bd1TE2772115	Bd21,Bd21-3,Bd30-1,Bd3-1,BdTR12c,Koz-3	Bd1-1
Bd1	40736969	40738855	Bd1TE2769783	Bd21,Bd21-3,Bd30-1,Bd3-1,BdTR12c,Koz-3	Bd1-1
Bd1	40738856	40739894	Bd1TE2771736	Bd21,Bd21-3,Bd30-1,Bd3-1,BdTR12c,Koz-3	Bd1-1
Bd1	40739895	40740531	Bd1TE2772988	Bd21,Bd21-3,Bd30-1,Bd3-1,BdTR12c,Koz-3	Bd1-1
Bd1	40740532	40742565	Bd1TE2769555	Bd21,Bd30-1,Bd3-1,BdTR12c,Koz-3	Bd21-3,Bd1-1
Bd1	40742566	40743372	Bd1TE2772417	Bd21,Bd30-1,Bd3-1,BdTR12c,Koz-3	Bd21-3,Bd1-1
Bd1	40743373	40745148	Bd1TE2769982	Bd21,Bd1-1,Bd30-1,Bd3-1,BdTR12c,Koz-3	Bd21-3
Bd1	40755060	40759714	Bd1TE2767069	Bd21,Bd21-3,Bd30-1,Bd3-1,BdTR12c,Koz-3	Bd1-1
Bd1	41019373	41019457	Bd1TE2748647	Bd1-1	Bd21,Bd21-3,Bd30-1,Bd3-1,BdTR12c,Koz-3
Bd1	41025386	41025426	Bd3TE2693060	Bd3-1,BdTR12c	Bd21,Bd1-1,Bd21-3,Bd30-1,Koz-3
Bd1	41026233	41026775	Bd1TE2750641	Bd21,Bd21-3,Bd30-1,Bd3-1,BdTR12c,Koz-3	Bd1-1
Bd1	41045648	41046646	Bd1TE2771845	Bd21,Bd21-3,Bd30-1,Bd3-1,BdTR12c,Koz-3	Bd1-1
Bd1	41124913	41125242	Bd1TE2775769	Bd21,Bd1-1,Bd21-3,Bd3-1	Koz-3,BdTR12c,Bd30-1
Bd1	41125243	41125306	Bd1TE2787248	Bd21,Bd1-1,Bd21-3,Bd3-1	Koz-3,BdTR12c,Bd30-1
Bd1	41125315	41128589	Bd1TE2768004	Bd21,Bd1-1,Bd21-3,Bd3-1	Koz-3,BdTR12c,Bd30-1
Bd1	41234005	41234124	Bd1TE2782406	Bd21,Bd1-1,Bd30-1,Bd3-1,BdTR12c,Koz-3	Bd21-3
Bd1	41234125	41234917	Bd1TE2773188	Bd21,Bd1-1,Bd30-1,Bd3-1,BdTR12c,Koz-3	Bd21-3
Bd1	41234918	41235190	Bd1TE2776620	Bd21,Bd30-1,Bd3-1,BdTR12c,Koz-3	Bd21-3,Bd1-1
Bd1	41241807	41244941	Bd1TE2768199	Bd21,Bd1-1,Bd21-3,Bd30-1,Bd3-1,Koz-3	BdTR12c
Bd1	41279470	41280364	Bd1TE2772121	Bd21,Bd21-3,Bd30-1,Bd3-1,BdTR12c,Koz-3	Bd1-1
Bd1	41344947	41349537	Bd1TE2748138	Bd21,Bd21-3,Bd30-1,Bd3-1,BdTR12c,Koz-3	Bd1-1
Bd1	41394476	41394720	Bd1TE2752009	Bd21,Bd21-3,Bd30-1,Bd3-1,BdTR12c,Koz-3	Bd1-1
Bd1	41474131	41475833	Bd1TE2770190	Bd21,Bd21-3,Bd30-1,Bd3-1,BdTR12c,Koz-3	Bd1-1
Bd1	41845308	41846633	Bd1TE2771134	Bd21,Bd30-1,Bd3-1,BdTR12c,Koz-3	Bd21-3,Bd1-1
Bd1	41850726	41852084	Bd1TE2770822	Bd21,Bd21-3,Bd30-1,Bd3-1,BdTR12c,Koz-3	Bd1-1
Bd1	42185899	42185969	Bd5TE2643653	Bd1-1	Bd21,Bd21-3,Bd30-1,Bd3-1,BdTR12c,Koz-3
Bd1	42387147	42393068	Bd1TE2747938	Bd21,Bd21-3,Bd30-1,Bd3-1,BdTR12c,Koz-3	Bd1-1
Bd1	42975344	42975963	Bd1TE2772251	Bd21,Bd21-3,Bd30-1,Bd3-1,BdTR12c,Koz-3	Bd1-1
Bd1	43013435	43013469	Bd3TE2690242	Bd1-1	Bd21,Bd21-3,Bd30-1,Bd3-1,BdTR12c,Koz-3
Bd1	43086961	43090663	Bd1TE2767573	Bd21,Bd1-1,Bd30-1,Bd3-1,BdTR12c,Koz-3	Bd21-3
Bd1	43224507	43224785	Bd1TE2776525	Bd21,Bd1-1,Bd30-1,Bd3-1,BdTR12c,Koz-3	Bd21-3
Bd1	43224819	43228571	Bd1TE2783020	Bd21,Bd1-1,Bd30-1,Bd3-1,BdTR12c,Koz-3	Bd21-3
Bd1	43225676	43227003	Bd1TE2771085	Bd21,Bd1-1,Bd30-1,Bd3-1,BdTR12c,Koz-3	Bd21-3
Bd1	43391574	43394205	Bd1TE2768734	Bd21,Bd30-1,Bd3-1,BdTR12c,Koz-3	Bd21-3,Bd1-1
Bd1	43395138	43396037	Bd1TE2786856	Bd21,Bd21-3,Bd30-1,Bd3-1,BdTR12c,Koz-3	Bd1-1
Bd1	43647287	43651065	Bd1TE2748291	Bd21,Bd21-3,Bd30-1,Bd3-1	Koz-3,BdTR12c,Bd1-1
Bd1	43789691	43793425	Bd1TE2748304	Bd21,Bd30-1,Bd3-1,BdTR12c,Koz-3	Bd21-3,Bd1-1
Bd1	43903900	43905641	Bd1TE2770056	Bd21,Bd21-3,Koz-3	Bd3-1,BdTR12c,Bd1-1,Bd30-1
Bd1	43916187	43917036	Bd1TE2772276	Bd21,Bd30-1,Bd3-1,BdTR12c,Koz-3	Bd21-3,Bd1-1
Bd1	43962961	43963071	Bd1TE2759212	Bd21,Bd1-1,Bd21-3,Bd3-1,BdTR12c,Koz-3	Bd30-1
Bd1	44029507	44031648	Bd1TE2769408	Bd21,Bd21-3,Bd30-1,Bd3-1,BdTR12c,Koz-3	Bd1-1
Bd1	44137410	44140812	Bd1TE2748441	Bd21,Bd1-1,Bd30-1,Bd3-1,BdTR12c,Koz-3	Bd21-3
Bd1	44205228	44205292	Bd1TE2787134	Bd21,Bd21-3,Bd30-1,Bd3-1,BdTR12c,Koz-3	Bd1-1
Bd1	44435431	44437041	Bd1TE2770363	Bd21,Bd30-1,Bd3-1,BdTR12c,Koz-3	Bd21-3,Bd1-1
Bd1	44447781	44448139	Bd1TE2775409	Bd21,Bd30-1,Bd3-1,BdTR12c,Koz-3	Bd21-3,Bd1-1
Bd1	44448140	44448574	Bd1TE2774638	Bd21,Bd30-1,Bd3-1	Koz-3,Bd21-3,Bd1-1,BdTR12c
Bd1	44448582	44449352	Bd1TE2772502	Bd21,Bd21-3,Bd30-1,Bd3-1	Koz-3,BdTR12c,Bd1-1
Bd1	44449353	44449713	Bd1TE2775380	Bd21,Bd30-1	Koz-3,Bd3-1,Bd21-3,Bd1-1,BdTR12c
Bd1	44449730	44456521	Bd1TE2767752	Bd21,Bd1-1,Bd21-3,Bd30-1,Bd3-1	Koz-3,BdTR12c
Bd1	44451758	44454031	Bd1TE2778849	Bd21,Bd21-3,Bd30-1,Bd3-1	Koz-3,BdTR12c,Bd1-1
Bd1	44451876	44453964	Bd1TE2769467	Bd21,Bd21-3,Bd30-1,Bd3-1	Koz-3,BdTR12c,Bd1-1
Bd1	44454032	44455128	Bd1TE2771641	Bd21,Bd21-3,Bd30-1,Bd3-1	Koz-3,BdTR12c,Bd1-1
Bd1	44456522	44456727	Bd1TE2778113	Bd21,Bd21-3,Bd30-1,Bd3-1	Koz-3,BdTR12c,Bd1-1
Bd1	44517937	44519706	Bd1TE2769995	Bd21,Bd21-3,Bd30-1,Bd3-1,BdTR12c,Koz-3	Bd1-1
Bd1	44519707	44527834	Bd1TE2766145	Bd21,Bd1-1,Bd21-3,Bd3-1	Koz-3,BdTR12c,Bd30-1
Bd1	44527835	44531296	Bd1TE2767726	Bd21,Bd1-1,Bd21-3,Bd3-1	Koz-3,BdTR12c,Bd30-1
Bd1	44537932	44545930	Bd1TE2747767	Bd21,Bd1-1,Bd21-3,Bd3-1,BdTR12c,Koz-3	Bd30-1
Bd1	44571654	44575349	Bd1TE2767576	Bd21,Bd21-3,Bd30-1,Bd3-1,Koz-3	BdTR12c,Bd1-1
Bd1	44686746	44687090	Bd1TE2775584	Bd21,Bd21-3,Bd30-1,Bd3-1,BdTR12c,Koz-3	Bd1-1
Bd1	44687154	44687385	Bd1TE2777482	Bd21,Bd21-3,Bd30-1,Bd3-1,BdTR12c,Koz-3	Bd1-1
Bd1	44696063	44696234	Bd1TE2779530	Bd21,Bd21-3,Bd30-1,Bd3-1,BdTR12c,Koz-3	Bd1-1
Bd1	44702832	44706130	Bd1TE2767952	Bd21,Bd21-3,Bd30-1,Bd3-1,BdTR12c,Koz-3	Bd1-1
Bd1	44750621	44750700	Bd1TE2764263	Bd21,Bd30-1,Bd3-1,BdTR12c,Koz-3	Bd21-3,Bd1-1
Bd1	44757976	44758169	Bd1TE2753311	Bd21,Bd30-1,Bd3-1,BdTR12c,Koz-3	Bd21-3,Bd1-1
Bd1	44758279	44758354	Bd1TE2764624	Bd21,Bd30-1,Bd3-1,BdTR12c,Koz-3	Bd21-3,Bd1-1
Bd1	44899756	44903384	Bd1TE2748340	Bd21,Bd30-1,Bd3-1,BdTR12c,Koz-3	Bd21-3,Bd1-1
Bd1	44903467	44903805	Bd1TE2751262	Bd21,Bd1-1,Bd30-1,Bd3-1,BdTR12c,Koz-3	Bd21-3
Bd1	44903869	44903954	Bd1TE2785312	Bd21,Bd1-1,Bd30-1,Bd3-1,BdTR12c,Koz-3	Bd21-3
Bd1	45191843	45191954	Bd1TE2783417	Bd21,Bd30-1,Bd3-1,BdTR12c,Koz-3	Bd21-3,Bd1-1
Bd1	45224091	45224485	Bd1TE2775047	Bd21,Bd1-1,Bd30-1,Bd3-1,BdTR12c,Koz-3	Bd21-3
Bd1	45225046	45225101	Bd1TE2788048	Bd21,Bd30-1,Bd3-1,BdTR12c,Koz-3	Bd21-3,Bd1-1
Bd1	45225104	45229838	Bd1TE2748122	Bd21,Bd1-1,Bd30-1,Bd3-1,BdTR12c,Koz-3	Bd21-3
Bd1	45381211	45381247	Bd5TE2641987,Bd5TE2642650	Bd1-1	Bd21,Bd21-3,Bd30-1,Bd3-1,BdTR12c,Koz-3
Bd1	45796847	45801171	Bd1TE2767347	Bd21,Bd1-1,Bd30-1,Bd3-1,BdTR12c,Koz-3	Bd21-3
Bd1	45806118	45806576	Bd1TE2774400	Bd21,Bd1-1,Bd30-1,Bd3-1,BdTR12c,Koz-3	Bd21-3
Bd1	45812004	45812432	Bd1TE2773915	Bd21,Bd30-1,Bd3-1,BdTR12c,Koz-3	Bd21-3,Bd1-1
Bd1	45877608	45877848	Bd1TE2752193	Bd21,Bd1-1,Bd21-3,Bd30-1,BdTR12c,Koz-3	Bd3-1
Bd1	45899727	45899767	Bd2TE2703121	BdTR12c	Bd21,Bd1-1,Bd21-3,Bd30-1,Bd3-1,Koz-3
Bd1	45899793	45899839	Bd2TE2703121	BdTR12c	Bd21,Bd1-1,Bd21-3,Bd30-1,Bd3-1,Koz-3
Bd1	45922329	45927475	Bd1TE2748178	Bd21,Bd1-1,Bd30-1,Bd3-1,BdTR12c,Koz-3	Bd21-3
Bd1	45923994	45924830	Bd1TE2750127	Bd21,Bd30-1,Bd3-1,BdTR12c,Koz-3	Bd21-3,Bd1-1
Bd1	46046347	46048836	Bd1TE2768916	Bd21,Bd21-3,Bd3-1	Koz-3,BdTR12c,Bd1-1,Bd30-1
Bd1	46121893	46121943	Bd2TE2723406	BdTR12c,Bd30-1	Bd21,Bd1-1,Bd21-3,Bd3-1,Koz-3
Bd1	46133560	46134927	Bd1TE2770784	Bd21,Bd1-1,Bd21-3	Koz-3,Bd3-1,BdTR12c,Bd30-1
Bd1	46186198	46186427	Bd1TE2777516	Bd21,Bd21-3,Bd30-1,Bd3-1,BdTR12c,Koz-3	Bd1-1
Bd1	46305758	46310216	Bd1TE2748162	Bd21,Bd1-1,Bd30-1,Bd3-1,BdTR12c,Koz-3	Bd21-3
Bd1	46541734	46549191	Bd1TE2747801	Bd21,Bd1-1,Bd21-3,Bd3-1,BdTR12c,Koz-3	Bd30-1
Bd1	46599337	46599425	Bd1TE2762951	Bd21,Bd30-1,Bd3-1,BdTR12c,Koz-3	Bd21-3,Bd1-1
Bd1	46605275	46605338	Bd1TE2787242	Bd21,Bd30-1,Bd3-1,BdTR12c,Koz-3	Bd21-3,Bd1-1
Bd1	46713405	46713645	Bd1TE2752174	Bd21,Bd21-3,Bd30-1,Bd3-1,BdTR12c,Koz-3	Bd1-1
Bd1	46754254	46757819	Bd1TE2748366	Bd21,Bd30-1,Bd3-1,BdTR12c,Koz-3	Bd21-3,Bd1-1
Bd1	46799175	46800131	Bd1TE2771947	Bd21,Bd21-3,Bd3-1,BdTR12c,Koz-3	Bd1-1,Bd30-1
Bd1	47118405	47120051	Bd1TE2770289	Bd21,Bd21-3,Bd30-1,Bd3-1,BdTR12c,Koz-3	Bd1-1
Bd1	47240360	47242073	Bd1TE2770153	Bd21,Bd1-1,Bd21-3,Bd3-1,BdTR12c,Koz-3	Bd30-1
Bd1	47271121	47272106	Bd1TE2771878	Bd21,Bd21-3,Bd30-1,Bd3-1,BdTR12c,Koz-3	Bd1-1
Bd1	47314832	47319082	Bd1TE2748636	Bd21,Bd30-1,Bd3-1,BdTR12c,Koz-3	Bd21-3,Bd1-1
Bd1	47317300	47318624	Bd1TE2771130	Bd21,Bd30-1	Koz-3,Bd3-1,Bd21-3,Bd1-1,BdTR12c
Bd1	47520225	47522582	Bd1TE2769083	Bd21,Bd1-1,Bd21-3,Bd3-1,BdTR12c,Koz-3	Bd30-1
Bd1	47633179	47633254	Bd1TE2786151	Bd21,Bd21-3,Bd30-1,Bd3-1,BdTR12c,Koz-3	Bd1-1
Bd1	47691070	47691687	Bd1TE2771649	Bd21,Bd21-3,Bd30-1,Bd3-1,BdTR12c,Koz-3	Bd1-1
Bd1	47694120	47695155	Bd1TE2771739	Bd21,Bd21-3,Bd30-1,Bd3-1,BdTR12c,Koz-3	Bd1-1
Bd1	47695369	47696242	Bd1TE2772190	Bd21,Bd21-3,Bd30-1,Bd3-1,BdTR12c,Koz-3	Bd1-1
Bd1	47699565	47699634	Bd1TE2786583	Bd21,Bd21-3,Bd30-1,Bd3-1,BdTR12c,Koz-3	Bd1-1
Bd1	47709052	47711508	Bd1TE2768955	Bd21,Bd1-1,Bd21-3,Bd30-1,Bd3-1,BdTR12c	Koz-3
Bd1	47747501	47747539	Bd3TE2702256	Bd21-3	Bd21,Bd1-1,Bd30-1,Bd3-1,BdTR12c,Koz-3
Bd1	47884056	47884100	Bd2TE2712319	Bd1-1	Bd21,Bd21-3,Bd30-1,Bd3-1,BdTR12c,Koz-3
Bd1	47930223	47930317	Bd2TE2694326	Bd1-1	Bd21,Bd21-3,Bd30-1,Bd3-1,BdTR12c,Koz-3
Bd1	47942147	47946707	Bd1TE2748143	Bd21,Bd1-1,Bd30-1,Bd3-1,BdTR12c,Koz-3	Bd21-3
Bd1	48416393	48421593	Bd1TE2748031	Bd21,Bd1-1	Koz-3,Bd3-1,Bd21-3,BdTR12c,Bd30-1
Bd1	48517823	48517885	Bd2TE2694278	Bd1-1	Bd21,Bd21-3,Bd30-1,Bd3-1,BdTR12c,Koz-3
Bd1	48742012	48742085	Bd5TE2637810	Bd30-1	Bd21,Bd1-1,Bd21-3,Bd3-1,BdTR12c,Koz-3
Bd1	48903844	48904383	Bd1TE2773573	Bd21,Bd1-1,Bd30-1,Bd3-1,BdTR12c,Koz-3	Bd21-3
Bd1	48976042	48976254	Bd1TE2777915	Bd21,Bd1-1,Bd21-3,Bd30-1,Bd3-1,Koz-3	BdTR12c
Bd1	48990769	48990842	Bd1TE2750727	Koz-3	Bd21,Bd1-1,Bd21-3,Bd30-1,Bd3-1,BdTR12c
Bd1	48992651	48992728	Bd1TE2747935	Bd3-1	Bd21,Bd1-1,Bd21-3,Bd30-1,BdTR12c,Koz-3
Bd1	49035077	49036434	Bd1TE2770824	Bd21,Bd1-1,Bd3-1,Koz-3	Bd21-3,BdTR12c,Bd30-1
Bd1	49049124	49049245	Bd1TE2755799	Bd21,Bd1-1,Bd30-1,Bd3-1,Koz-3	Bd21-3,BdTR12c
Bd1	49062421	49063867	Bd1TE2770622	Bd21,Bd21-3,Bd30-1,Bd3-1,BdTR12c,Koz-3	Bd1-1
Bd1	49085186	49085389	Bd1TE2778169	Bd21,Bd30-1,Bd3-1,BdTR12c,Koz-3	Bd21-3,Bd1-1
Bd1	49310711	49310826	Bd1TE2757915	Bd21,Bd1-1,Bd21-3,Bd30-1,Bd3-1,Koz-3	BdTR12c
Bd1	49311649	49311691	Bd1TE2758134	BdTR12c	Bd21,Bd1-1,Bd21-3,Bd30-1,Bd3-1,Koz-3
Bd1	49544399	49547687	Bd1TE2767972	Bd21,Bd21-3,Bd30-1,Bd3-1,BdTR12c,Koz-3	Bd1-1
Bd1	49570253	49575619	Bd1TE2766743	Bd21,Bd1-1,Bd21-3,Bd3-1,BdTR12c,Koz-3	Bd30-1
Bd1	49575620	49575704	Bd1TE2763638	Bd21,Bd1-1,Bd21-3,Bd3-1,BdTR12c,Koz-3	Bd30-1
Bd1	49575805	49576088	Bd1TE2776410	Bd21,Bd1-1,Bd21-3,Bd3-1,BdTR12c,Koz-3	Bd30-1
Bd1	49576089	49576169	Bd1TE2764088	Bd21,Bd1-1,Bd21-3,Bd3-1,BdTR12c,Koz-3	Bd30-1
Bd1	49576171	49576646	Bd1TE2774225	Bd21,Bd1-1,Bd21-3,Bd3-1,BdTR12c,Koz-3	Bd30-1
Bd1	49816963	49817426	Bd1TE2774347	Bd21,Bd21-3,Bd30-1,Bd3-1,BdTR12c,Koz-3	Bd1-1
Bd1	49915901	49916003	Bd1TE2760421	Bd21,Bd30-1,Bd3-1,BdTR12c,Koz-3	Bd21-3,Bd1-1
Bd1	49960359	49962787	Bd1TE2772525	Bd21,Bd1-1,Bd30-1,Bd3-1,BdTR12c,Koz-3	Bd21-3
Bd1	50146286	50147227	Bd1TE2771936	Bd21,Bd30-1,Bd3-1,BdTR12c,Koz-3	Bd21-3,Bd1-1
Bd1	50188220	50193025	Bd1TE2748102	Bd21,Bd1-1	Koz-3,Bd3-1,Bd21-3,BdTR12c,Bd30-1
Bd1	50193044	50193162	Bd1TE2782980	Bd21,Bd21-3,Bd30-1,Bd3-1,BdTR12c,Koz-3	Bd1-1
Bd1	50498167	50498396	Bd1TE2752430	Bd21,Bd30-1,BdTR12c,Koz-3	Bd3-1,Bd21-3,Bd1-1
Bd1	50521375	50521425	Bd4TE2682433	Bd1-1	Bd21,Bd21-3,Bd30-1,Bd3-1,BdTR12c,Koz-3
Bd1	50568806	50570159	Bd1TE2770850	Bd21,Bd21-3,Bd30-1,Bd3-1,Koz-3	BdTR12c,Bd1-1
Bd1	50573516	50574842	Bd1TE2771041	Bd21,Bd21-3,Bd30-1,Bd3-1,BdTR12c,Koz-3	Bd1-1
Bd1	50756198	50756992	Bd1TE2772450	Bd21,Bd1-1,Bd30-1,Bd3-1,BdTR12c,Koz-3	Bd21-3
Bd1	50821698	50821743	Bd2TE2694899	BdTR12c	Bd21,Bd1-1,Bd21-3,Bd30-1,Bd3-1,Koz-3
Bd1	50862721	50869429	Bd1TE2766370	Bd21,Bd1-1,Bd21-3,Bd3-1	Koz-3,BdTR12c,Bd30-1
Bd1	50977924	50981733	Bd1TE2748281	Bd21,Bd1-1,Bd30-1,Bd3-1,BdTR12c,Koz-3	Bd21-3
Bd1	50979225	50979350	Bd1TE2749705	Bd21-3	Bd21,Bd1-1,Bd30-1,Bd3-1,BdTR12c,Koz-3
Bd1	51124785	51126548	Bd1TE2770006	Bd21,Bd21-3,Bd3-1,BdTR12c,Koz-3	Bd1-1,Bd30-1
Bd1	51128277	51129619	Bd1TE2770930	Bd21,Bd3-1,BdTR12c,Koz-3	Bd21-3,Bd1-1,Bd30-1
Bd1	51232544	51236559	Bd1TE2767390	Bd21,Bd1-1,Bd30-1,Bd3-1,BdTR12c,Koz-3	Bd21-3
Bd1	51247986	51249265	Bd1TE2749557	Bd21,Bd21-3,Bd30-1,Bd3-1,BdTR12c,Koz-3	Bd1-1
Bd1	51279622	51280661	Bd1TE2771735	Bd21,Bd1-1,Bd30-1,Bd3-1,BdTR12c,Koz-3	Bd21-3
Bd1	51296524	51299519	Bd1TE2768348	Bd21,Bd1-1,Bd21-3,Bd30-1,Bd3-1	Koz-3,BdTR12c
Bd1	51332294	51332937	Bd1TE2772944	Bd21,Bd21-3,Bd30-1,Bd3-1,BdTR12c,Koz-3	Bd1-1
Bd1	51332938	51334259	Bd1TE2771163	Bd21,Bd21-3,Bd30-1,Bd3-1,BdTR12c,Koz-3	Bd1-1
Bd1	51334288	51336041	Bd1TE2778809	Bd21,Bd21-3,Bd30-1,Bd3-1,BdTR12c,Koz-3	Bd1-1
Bd1	51334428	51335994	Bd1TE2770432	Bd21,Bd21-3,Bd30-1,Bd3-1,BdTR12c,Koz-3	Bd1-1
Bd1	51361557	51365675	Bd1TE2767358	Bd21,Bd21-3,Bd3-1,BdTR12c,Koz-3	Bd1-1,Bd30-1
Bd1	51389894	51391245	Bd1TE2770877	Bd21,Koz-3	Bd3-1,Bd21-3,Bd1-1,BdTR12c,Bd30-1
Bd1	51404472	51405512	Bd1TE2749826	Bd21,Bd21-3,Bd30-1,Bd3-1,BdTR12c,Koz-3	Bd1-1
Bd1	51501902	51503737	Bd1TE2769873	Bd21,Bd1-1,Bd30-1,Bd3-1,BdTR12c,Koz-3	Bd21-3
Bd1	51513129	51517640	Bd1TE2748153	Bd21,Bd1-1,Bd30-1,Bd3-1,BdTR12c,Koz-3	Bd21-3
Bd1	51600453	51604462	Bd1TE2777384	Bd21,Bd1-1,Bd30-1,Bd3-1,BdTR12c,Koz-3	Bd21-3
Bd1	51600479	51600572	Bd1TE2762211	Bd21,Bd30-1,Bd3-1,BdTR12c,Koz-3	Bd21-3,Bd1-1
Bd1	51600717	51600844	Bd1TE2755231	Bd21,Bd30-1,Bd3-1,BdTR12c,Koz-3	Bd21-3,Bd1-1
Bd1	51600847	51601007	Bd1TE2780160	Bd21,Bd30-1,Bd3-1,BdTR12c,Koz-3	Bd21-3,Bd1-1
Bd1	51602058	51602143	Bd1TE2763499	Bd21,Bd30-1,Bd3-1,BdTR12c,Koz-3	Bd21-3,Bd1-1
Bd1	51615334	51615575	Bd1TE2777266	Bd21,Bd21-3,Bd30-1,Bd3-1,BdTR12c,Koz-3	Bd1-1
Bd1	51619711	51622955	Bd1TE2768034	Bd21,Bd21-3,Bd30-1,Bd3-1,BdTR12c,Koz-3	Bd1-1
Bd1	51622959	51625589	Bd1TE2768736	Bd21,Bd21-3,Bd30-1,Bd3-1,BdTR12c,Koz-3	Bd1-1
Bd1	51625590	51627904	Bd1TE2769169	Bd21,Bd21-3,Bd30-1,Bd3-1,BdTR12c,Koz-3	Bd1-1
Bd1	51746906	51748618	Bd1TE2770155	Bd21,Bd21-3,Bd3-1,BdTR12c	Koz-3,Bd1-1,Bd30-1
Bd1	51772670	51773713	Bd1TE2771713	Bd21,Bd21-3,Bd3-1,BdTR12c,Koz-3	Bd1-1,Bd30-1
Bd1	51796300	51796388	Bd3TE2701517	Bd1-1	Bd21,Bd21-3,Bd30-1,Bd3-1,BdTR12c,Koz-3
Bd1	51909360	51909416	Bd2TE2693890,Bd2TE2711366	Bd1-1	Bd21,Bd21-3,Bd30-1,Bd3-1,BdTR12c,Koz-3
Bd1	51909714	51909751	Bd1TE2769069	Bd1-1	Bd21,Bd21-3,Bd30-1,Bd3-1,BdTR12c,Koz-3
Bd1	52000238	52000536	Bd1TE2776178	Bd21,Bd21-3,Bd30-1,Bd3-1,BdTR12c,Koz-3	Bd1-1
Bd1	52065059	52066771	Bd1TE2770157	Bd21,Bd21-3,BdTR12c,Koz-3	Bd3-1,Bd1-1,Bd30-1
Bd1	52101674	52103434	Bd1TE2770008	Bd21,Bd1-1,Bd30-1,Bd3-1,BdTR12c,Koz-3	Bd21-3
Bd1	52257621	52260734	Bd1TE2768219	Bd21,Bd21-3,BdTR12c,Koz-3	Bd3-1,Bd1-1,Bd30-1
Bd1	52329587	52332719	Bd1TE2768203	Bd21,Bd21-3,BdTR12c,Koz-3	Bd3-1,Bd1-1,Bd30-1
Bd1	52367950	52369670	Bd1TE2770104	Bd21,Bd21-3,BdTR12c,Koz-3	Bd3-1,Bd1-1,Bd30-1
Bd1	52449952	52449986	Bd4TE2672507,Bd4TE2680603	Koz-3	Bd21,Bd1-1,Bd21-3,Bd30-1,Bd3-1,BdTR12c
Bd1	52697578	52697836	Bd1TE2776909	Bd21,Bd1-1,Bd21-3,Bd3-1,Koz-3	BdTR12c,Bd30-1
Bd1	52829358	52829474	Bd1TE2757872	Bd21,Bd21-3,Bd3-1,BdTR12c,Koz-3	Bd1-1,Bd30-1
Bd1	52986552	52986638	Bd1TE2763166	Bd21,Bd30-1,Bd3-1,BdTR12c,Koz-3	Bd21-3,Bd1-1
Bd1	52986668	52986726	Bd1TE2765854	Bd21,Bd30-1,Bd3-1,BdTR12c,Koz-3	Bd21-3,Bd1-1
Bd1	53129418	53129728	Bd1TE2776023	Bd21,Bd21-3,Bd30-1,Bd3-1,BdTR12c,Koz-3	Bd1-1
Bd1	53251100	53251371	Bd1TE2751736	Bd21,Bd21-3,Bd30-1,Bd3-1,BdTR12c,Koz-3	Bd1-1
Bd1	53373061	53373177	Bd1TE2757700	Bd21,Bd30-1,Bd3-1,BdTR12c,Koz-3	Bd21-3,Bd1-1
Bd1	53377789	53377884	Bd1TE2761613	Bd21,Bd21-3,Bd30-1,Bd3-1,BdTR12c,Koz-3	Bd1-1
Bd1	53418931	53420302	Bd1TE2770773	Bd21,Bd21-3,Bd30-1,Bd3-1,BdTR12c,Koz-3	Bd1-1
Bd1	53620961	53622287	Bd1TE2771116	Bd21,Bd1-1,Bd21-3,Bd3-1	Koz-3,BdTR12c,Bd30-1
Bd1	53781548	53784598	Bd1TE2748593	Bd21,Bd1-1,Bd30-1,Bd3-1,BdTR12c,Koz-3	Bd21-3
Bd1	53836712	53838430	Bd1TE2770109	Bd21,Bd30-1,Bd3-1,BdTR12c,Koz-3	Bd21-3,Bd1-1
Bd1	53914328	53918622	Bd1TE2748184	Bd21,Bd30-1,Bd3-1,BdTR12c,Koz-3	Bd21-3,Bd1-1
Bd1	53925323	53925593	Bd1TE2751745	Bd21,Bd1-1,Bd21-3,Bd3-1	Koz-3,BdTR12c,Bd30-1
Bd1	53933285	53938758	Bd1TE2747976	Bd21,Bd1-1,Bd21-3,Koz-3	Bd3-1,BdTR12c,Bd30-1
Bd1	54008647	54013137	Bd1TE2748160	Bd21,Bd1-1,Bd30-1,Bd3-1,BdTR12c,Koz-3	Bd21-3
Bd1	54414591	54416327	Bd1TE2770062	Bd21,Bd21-3,Bd30-1,Bd3-1,BdTR12c,Koz-3	Bd1-1
Bd1	54418920	54420248	Bd1TE2771065	Bd21,Bd21-3,Bd30-1,Bd3-1,BdTR12c,Koz-3	Bd1-1
Bd1	54599127	54599228	Bd1TE2784057	Bd21,Bd21-3,Bd30-1,Bd3-1,BdTR12c,Koz-3	Bd1-1
Bd1	54604560	54604899	Bd1TE2775626	Bd21,Bd21-3,Bd30-1,Bd3-1,BdTR12c,Koz-3	Bd1-1
Bd1	54836286	54839835	Bd1TE2748378	Bd21,Bd21-3,Bd30-1,Bd3-1,BdTR12c,Koz-3	Bd1-1
Bd1	54874473	54874583	Bd1TE2759087	Bd21,Bd1-1,Bd30-1,Bd3-1,BdTR12c,Koz-3	Bd21-3
Bd1	54874584	54878295	Bd1TE2767565	Bd21,Bd1-1,Bd30-1,Bd3-1,BdTR12c,Koz-3	Bd21-3
Bd1	54878439	54878836	Bd1TE2775002	Bd21,Bd1-1,Bd30-1,Bd3-1,BdTR12c,Koz-3	Bd21-3
Bd1	54878837	54878930	Bd1TE2762231	Bd21,Bd1-1,Bd30-1,Bd3-1,BdTR12c,Koz-3	Bd21-3
Bd1	54959031	54960053	Bd1TE2771764	Bd21	Koz-3,Bd3-1,BdTR12c,Bd21-3,Bd1-1,Bd30-1
Bd1	54993236	54996572	Bd1TE2767848	Bd21,Bd1-1,Bd21-3,Bd30-1,Bd3-1,Koz-3	BdTR12c
Bd1	55002715	55008367	Bd1TE2766658	Bd21,Bd21-3,Bd30-1,Bd3-1,BdTR12c,Koz-3	Bd1-1
Bd1	55008376	55009625	Bd1TE2771389	Bd21,Bd21-3,Bd30-1,Bd3-1,BdTR12c,Koz-3	Bd1-1
Bd1	55064118	55064221	Bd5TE2638008	Koz-3,BdTR12c	Bd21,Bd1-1,Bd21-3,Bd30-1,Bd3-1
Bd1	55071336	55072271	Bd1TE2749950	Bd21,Bd1-1,Bd30-1,Bd3-1,BdTR12c,Koz-3	Bd21-3
Bd1	55217871	55219157	Bd1TE2771306	Bd21,Bd1-1,Bd21-3,Bd3-1,BdTR12c,Koz-3	Bd30-1
Bd1	55224831	55226290	Bd1TE2770604	Bd21,Bd21-3,Bd3-1,BdTR12c,Koz-3	Bd1-1,Bd30-1
Bd1	55226291	55228525	Bd1TE2769275	Bd21,Bd21-3,Bd3-1,BdTR12c,Koz-3	Bd1-1,Bd30-1
Bd1	55228526	55229255	Bd1TE2772608	Bd21,Bd3-1,BdTR12c,Koz-3	Bd21-3,Bd1-1,Bd30-1
Bd1	55232662	55232755	Bd1TE2762132	Bd21,Bd3-1,BdTR12c,Koz-3	Bd21-3,Bd1-1,Bd30-1
Bd1	55278225	55280282	Bd1TE2748991	Bd21,Bd1-1,Bd30-1,Bd3-1,BdTR12c,Koz-3	Bd21-3
Bd1	55325738	55326172	Bd1TE2750980	Bd21,Bd1-1,Bd21-3,Bd3-1,BdTR12c,Koz-3	Bd30-1
Bd1	55497275	55497369	Bd1TE2748239	Bd1-1,Bd30-1	Bd21,Bd21-3,Bd3-1,BdTR12c,Koz-3
Bd1	55590219	55596571	Bd1TE2766456	Bd21,Bd1-1,Bd21-3,Bd30-1,Bd3-1	Koz-3,BdTR12c
Bd1	55627341	55629033	Bd1TE2770216	Bd21,Bd21-3,BdTR12c,Koz-3	Bd3-1,Bd1-1,Bd30-1
Bd1	55696354	55697710	Bd1TE2770832	Bd21,Bd3-1	Koz-3,Bd21-3,Bd1-1,BdTR12c,Bd30-1
Bd1	55722513	55722557	Bd2TE2724506	Koz-3,Bd21-3,BdTR12c,Bd30-1	Bd21,Bd1-1,Bd3-1
Bd1	55788830	55790191	Bd1TE2770804	Bd21	Koz-3,Bd3-1,BdTR12c,Bd21-3,Bd1-1,Bd30-1
Bd1	55815597	55816369	Bd1TE2750231	Bd21,Bd1-1,Bd21-3,Bd30-1,Bd3-1,BdTR12c	Koz-3
Bd1	55816371	55820746	Bd1TE2767203	Bd21,Bd1-1,Bd30-1,Bd3-1,BdTR12c,Koz-3	Bd21-3
Bd1	55820841	55820936	Bd1TE2761772	Bd21,Bd30-1,Bd3-1,BdTR12c,Koz-3	Bd21-3,Bd1-1
Bd1	56215503	56217956	Bd1TE2769065	Bd21,Bd21-3,Bd30-1,Bd3-1,BdTR12c,Koz-3	Bd1-1
Bd1	56371561	56371731	Bd1TE2779611	Bd21,Bd1-1,Bd30-1,Bd3-1,BdTR12c,Koz-3	Bd21-3
Bd1	56514474	56518031	Bd1TE2748370	Bd21,Bd21-3,Bd30-1,Bd3-1,BdTR12c,Koz-3	Bd1-1
Bd1	56597911	56597970	Bd1TE2786158	Bd21,Bd21-3,Bd30-1,Bd3-1,BdTR12c,Koz-3	Bd1-1
Bd1	56597971	56600414	Bd1TE2748815	Bd21,Bd21-3,Bd30-1,Bd3-1,BdTR12c,Koz-3	Bd1-1
Bd1	56723358	56723407	Bd2TE2697772	BdTR12c	Bd21,Bd1-1,Bd21-3,Bd30-1,Bd3-1,Koz-3
Bd1	56811934	56812158	Bd1TE2777604	Bd21,Bd1-1,Bd21-3,Bd30-1,Bd3-1,Koz-3	BdTR12c
Bd1	56812159	56818818	Bd1TE2766375	Bd21,Bd1-1,Bd21-3,Bd30-1,Bd3-1,Koz-3	BdTR12c
Bd1	56871502	56875522	Bd1TE2748235	Bd21,Bd1-1,Bd21-3,Bd30-1,BdTR12c,Koz-3	Bd3-1
Bd1	56991701	56993002	Bd1TE2771260	Bd21,Bd21-3,Bd30-1,Bd3-1,BdTR12c,Koz-3	Bd1-1
Bd1	57003544	57004308	Bd1TE2772527	Bd21,Bd1-1,Bd21-3,Bd30-1,Bd3-1,BdTR12c	Koz-3
Bd1	57081701	57082424	Bd1TE2772623	Bd21,Bd1-1,Bd3-1,BdTR12c	Koz-3,Bd21-3,Bd30-1
Bd1	57330029	57330072	Bd1TE2760052	Koz-3	Bd21,Bd1-1,Bd21-3,Bd30-1,Bd3-1,BdTR12c
Bd1	57335650	57339694	Bd1TE2776241	Bd21,Bd21-3,Bd30-1,Bd3-1,BdTR12c,Koz-3	Bd1-1
Bd1	57335934	57337946	Bd1TE2772724	Bd21,Bd21-3,Bd30-1,Bd3-1,BdTR12c,Koz-3	Bd1-1
Bd1	57336382	57337706	Bd1TE2771145	Bd21,Bd21-3,Bd30-1,Bd3-1,BdTR12c,Koz-3	Bd1-1
Bd1	57337947	57339294	Bd1TE2770903	Bd21,Bd21-3,Bd30-1,Bd3-1,BdTR12c,Koz-3	Bd1-1
Bd1	57339295	57339528	Bd1TE2777441	Bd21,Bd21-3,Bd30-1,Bd3-1,BdTR12c,Koz-3	Bd1-1
Bd1	57396075	57399439	Bd1TE2767816	Bd21,Bd21-3,Bd30-1,Bd3-1,BdTR12c,Koz-3	Bd1-1
Bd1	57416545	57417887	Bd1TE2770810	Bd21,Bd1-1,Bd3-1	Koz-3,Bd21-3,BdTR12c,Bd30-1
Bd1	57418872	57419048	Bd1TE2778425	Bd21,Bd21-3,Bd30-1,Bd3-1,BdTR12c,Koz-3	Bd1-1
Bd1	57449104	57449199	Bd1TE2761776	Bd21,Bd1-1,Bd30-1,Bd3-1,BdTR12c,Koz-3	Bd21-3
Bd1	57451158	57454497	Bd1TE2767842	Bd21	Koz-3,Bd3-1,BdTR12c,Bd21-3,Bd1-1,Bd30-1
Bd1	57458937	57459022	Bd1TE2763230	Bd21,Bd1-1,Bd30-1,Bd3-1,BdTR12c,Koz-3	Bd21-3
Bd1	57573039	57573144	Bd1TE2760004	Bd21,Bd21-3,Bd30-1,Bd3-1,BdTR12c	Koz-3,Bd1-1
Bd1	57689595	57695469	Bd1TE2747942	Bd21,Bd1-1,Bd3-1,BdTR12c	Koz-3,Bd21-3,Bd30-1
Bd1	57696187	57700161	Bd1TE2767412	Bd21,Bd1-1,Bd30-1,Bd3-1,BdTR12c,Koz-3	Bd21-3
Bd1	57838302	57838546	Bd1TE2752015	Bd21,Bd1-1,Bd3-1,BdTR12c	Koz-3,Bd21-3,Bd30-1
Bd1	58007890	58007983	Bd1TE2784740	Bd21,Bd1-1,Bd30-1,Bd3-1,BdTR12c,Koz-3	Bd21-3
Bd1	58008534	58012699	Bd1TE2748210	Bd21,Bd1-1,Bd30-1,Bd3-1,BdTR12c,Koz-3	Bd21-3
Bd1	58043972	58045306	Bd1TE2771002	Bd21,Bd1-1,Bd3-1	Koz-3,Bd21-3,BdTR12c,Bd30-1
Bd1	58173039	58173123	Bd1TE2770934	Bd3-1	Bd21,Bd1-1,Bd21-3,Bd30-1,BdTR12c,Koz-3
Bd1	58258464	58258537	Bd1TE2749096	Bd1-1	Bd21,Bd21-3,Bd30-1,Bd3-1,BdTR12c,Koz-3
Bd1	58294989	58295039	Bd3TE2690031	Bd21-3	Bd21,Bd1-1,Bd30-1,Bd3-1,BdTR12c,Koz-3
Bd1	58294989	58295039	Bd3TE2706362	Bd30-1	Bd21,Bd1-1,Bd21-3,Bd3-1,BdTR12c,Koz-3
Bd1	58364282	58364365	Bd3TE2702525	Bd1-1	Bd21,Bd21-3,Bd30-1,Bd3-1,BdTR12c,Koz-3
Bd1	58504736	58504852	Bd1TE2757634	Bd21,Bd30-1,Bd3-1,BdTR12c,Koz-3	Bd21-3,Bd1-1
Bd1	58582729	58586511	Bd1TE2767531	Bd21,Bd21-3,Bd30-1,Bd3-1,BdTR12c,Koz-3	Bd1-1
Bd1	58635822	58635978	Bd1TE2754296	Bd21,Bd21-3,Bd30-1,Bd3-1,BdTR12c,Koz-3	Bd1-1
Bd1	58769278	58771671	Bd1TE2748878	Bd21,Bd1-1,Bd30-1,Bd3-1,BdTR12c,Koz-3	Bd21-3
Bd1	58930400	58931041	Bd1TE2772994	Bd21,Bd21-3,Bd30-1,Bd3-1,BdTR12c,Koz-3	Bd1-1
Bd1	58931042	58934243	Bd1TE2768080	Bd21,Bd21-3,Bd30-1,Bd3-1,BdTR12c,Koz-3	Bd1-1
Bd1	58934244	58935535	Bd1TE2771286	Bd21,Bd21-3,Bd30-1,Bd3-1,BdTR12c,Koz-3	Bd1-1
Bd1	58935947	58936090	Bd1TE2781146	Bd21,Bd21-3,Bd30-1,Bd3-1,BdTR12c,Koz-3	Bd1-1
Bd1	58972467	58977052	Bd1TE2748140	Bd21,Bd1-1,Bd30-1,Bd3-1,BdTR12c,Koz-3	Bd21-3
Bd1	58990882	58991254	Bd1TE2775283	Bd21,Bd21-3,Bd30-1,Bd3-1,BdTR12c,Koz-3	Bd1-1
Bd1	58991255	58998184	Bd1TE2766323	Bd21,Bd21-3,Bd30-1,Bd3-1,BdTR12c,Koz-3	Bd1-1
Bd1	59000852	59003588	Bd1TE2768621	Bd21,Bd21-3,Bd30-1,Bd3-1,BdTR12c,Koz-3	Bd1-1
Bd1	59004060	59004561	Bd1TE2773938	Bd21,Bd21-3,Bd30-1,Bd3-1,BdTR12c,Koz-3	Bd1-1
Bd1	59004575	59005492	Bd1TE2772045	Bd21,Bd21-3,Bd30-1,Bd3-1,Koz-3	BdTR12c,Bd1-1
Bd1	59158166	59158206	Bd5TE2644051	Bd3-1	Bd21,Bd1-1,Bd21-3,Bd30-1,BdTR12c,Koz-3
Bd1	59188711	59189476	Bd1TE2772523	Bd21,Bd1-1,Bd3-1,Koz-3	Bd21-3,BdTR12c,Bd30-1
Bd1	59235884	59236070	Bd1TE2778780	Bd21,Bd21-3,Bd30-1,Bd3-1,BdTR12c,Koz-3	Bd1-1
Bd1	59425290	59427006	Bd1TE2770123	Bd21,Bd21-3,Bd30-1,Bd3-1,BdTR12c,Koz-3	Bd1-1
Bd1	59449796	59450490	Bd1TE2772703	Bd21,Bd21-3,Bd30-1,Bd3-1,BdTR12c,Koz-3	Bd1-1
Bd1	59525248	59526084	Bd1TE2772309	Bd21,Bd21-3,Bd30-1,Bd3-1,BdTR12c,Koz-3	Bd1-1
Bd1	59861409	59861519	Bd1TE2783512	Bd21,Bd21-3,Bd30-1,Bd3-1,BdTR12c,Koz-3	Bd1-1
Bd1	59967136	59967988	Bd1TE2772258	Bd21,Bd21-3,Bd30-1,Bd3-1,BdTR12c,Koz-3	Bd1-1
Bd1	59998927	59999282	Bd1TE2776507	Bd21,Bd21-3,Bd30-1,Bd3-1,BdTR12c,Koz-3	Bd1-1
Bd1	60148665	60151442	Bd1TE2748689	Bd21,Bd1-1,Bd30-1,Bd3-1,BdTR12c,Koz-3	Bd21-3
Bd1	60151443	60151980	Bd1TE2773583	Bd21,Bd1-1,Bd30-1,Bd3-1,BdTR12c,Koz-3	Bd21-3
Bd1	60310184	60310267	Bd1TE2770972	Bd1-1	Bd21,Bd21-3,Bd30-1,Bd3-1,BdTR12c,Koz-3
Bd1	60597962	60604978	Bd1TE2766313	Bd21,Bd21-3,Bd30-1,Bd3-1,BdTR12c,Koz-3	Bd1-1
Bd1	60689160	60690658	Bd1TE2749382	Bd21,Bd21-3,Bd30-1,Bd3-1,BdTR12c,Koz-3	Bd1-1
Bd1	60691245	60696292	Bd1TE2766879	Bd21,Bd21-3,Bd30-1,Bd3-1,BdTR12c,Koz-3	Bd1-1
Bd1	61142853	61142912	Bd1TE2787415	Bd21,Bd30-1,Bd3-1,BdTR12c,Koz-3	Bd21-3,Bd1-1
Bd1	61142913	61142993	Bd1TE2764108	Bd21,Bd30-1,Bd3-1,BdTR12c,Koz-3	Bd21-3,Bd1-1
Bd1	61142994	61147095	Bd1TE2773451	Bd21,Bd1-1,Bd30-1,Bd3-1,BdTR12c,Koz-3	Bd21-3
Bd1	61143039	61143152	Bd1TE2758619	Bd21,Bd30-1,Bd3-1,BdTR12c,Koz-3	Bd21-3,Bd1-1
Bd1	61145923	61146061	Bd1TE2781444	Bd21,Bd30-1,Bd3-1,BdTR12c,Koz-3	Bd21-3,Bd1-1
Bd1	61146298	61146393	Bd1TE2761671	Bd21,Bd30-1,Bd3-1,BdTR12c,Koz-3	Bd21-3,Bd1-1
Bd1	61276261	61276307	Bd1TE2748490	Bd1-1	Bd21,Bd21-3,Bd30-1,Bd3-1,BdTR12c,Koz-3
Bd1	61293068	61293148	Bd4TE2672814	Bd1-1	Bd21,Bd21-3,Bd30-1,Bd3-1,BdTR12c,Koz-3
Bd1	61309209	61314061	Bd1TE2748096	Bd21,Bd21-3,Bd30-1,Bd3-1,BdTR12c,Koz-3	Bd1-1
Bd1	61403105	61404778	Bd1TE2770267	Bd21,Bd21-3,Bd30-1,Bd3-1,BdTR12c,Koz-3	Bd1-1
Bd1	61445597	61445655	Bd1TE2778403	Bd1-1	Bd21,Bd21-3,Bd30-1,Bd3-1,BdTR12c,Koz-3
Bd1	61448949	61449049	Bd1TE2760720	Bd21,Bd30-1,Bd3-1,BdTR12c,Koz-3	Bd21-3,Bd1-1
Bd1	61454065	61454139	Bd1TE2764720	Bd21,Bd21-3,Bd30-1,Bd3-1,BdTR12c,Koz-3	Bd1-1
Bd1	61717350	61718678	Bd1TE2771081	Bd21,Bd1-1,Bd21-3,Bd3-1,BdTR12c,Koz-3	Bd30-1
Bd1	61883066	61887093	Bd1TE2748233	Bd21,Bd30-1,Bd3-1,BdTR12c,Koz-3	Bd21-3,Bd1-1
Bd1	61956079	61959638	Bd1TE2748368	Bd21,Bd30-1,Bd3-1,BdTR12c,Koz-3	Bd21-3,Bd1-1
Bd1	61962952	61964276	Bd1TE2771149	Bd21,Bd30-1,Bd3-1,BdTR12c,Koz-3	Bd21-3,Bd1-1
Bd1	62023472	62024827	Bd1TE2770834	Bd21,Bd21-3,Bd30-1,Bd3-1,BdTR12c,Koz-3	Bd1-1
Bd1	62245997	62247026	Bd1TE2771607	Bd21,Bd21-3,Bd30-1,Bd3-1,BdTR12c,Koz-3	Bd1-1
Bd1	62446733	62446796	Bd1TE2748813	Bd1-1	Bd21,Bd21-3,Bd30-1,Bd3-1,BdTR12c,Koz-3
Bd1	62561203	62562943	Bd1TE2770038	Bd21,Bd21-3,Bd30-1,Bd3-1,BdTR12c,Koz-3	Bd1-1
Bd1	62562955	62563872	Bd1TE2771941	Bd21,Bd21-3,Bd30-1,Bd3-1,BdTR12c,Koz-3	Bd1-1
Bd1	62626764	62627008	Bd1TE2752049	Bd21,Bd30-1	Koz-3,Bd3-1,Bd21-3,Bd1-1,BdTR12c
Bd1	62834716	62838486	Bd1TE2748296	Bd21,Bd30-1,Bd3-1,BdTR12c,Koz-3	Bd21-3,Bd1-1
Bd1	62883503	62884839	Bd1TE2770984	Bd21,Bd1-1,Bd21-3,Bd30-1,Bd3-1	Koz-3,BdTR12c
Bd1	62907088	62910739	Bd1TE2776154	Bd21,Bd30-1,Bd3-1,BdTR12c,Koz-3	Bd21-3,Bd1-1
Bd1	62907100	62907216	Bd1TE2757507	Bd21,Bd30-1,Bd3-1,BdTR12c,Koz-3	Bd21-3,Bd1-1
Bd1	62909751	62909805	Bd1TE2788117	Bd21,Bd30-1,Bd3-1,BdTR12c,Koz-3	Bd21-3,Bd1-1
Bd1	62910605	62910721	Bd1TE2757487	Bd21,Bd30-1,Bd3-1,BdTR12c,Koz-3	Bd21-3,Bd1-1
Bd1	63017784	63019115	Bd1TE2771033	Bd21,Bd1-1,Bd21-3,Bd30-1,Bd3-1,Koz-3	BdTR12c
Bd1	63019122	63019628	Bd1TE2773890	Bd21,Bd21-3,Bd30-1,Bd3-1	Koz-3,BdTR12c,Bd1-1
Bd1	63019629	63024395	Bd1TE2767826	Bd21,Bd21-3,Bd30-1,Bd3-1	Koz-3,BdTR12c,Bd1-1
Bd1	63022694	63024107	Bd1TE2770678	Bd21,Bd21-3,Bd30-1,Bd3-1	Koz-3,BdTR12c,Bd1-1
Bd1	63081309	63085699	Bd1TE2767188	Bd21,Bd1-1,Bd30-1,Bd3-1,BdTR12c,Koz-3	Bd21-3
Bd1	63224228	63224468	Bd1TE2752160	Bd21,Bd30-1,BdTR12c,Koz-3	Bd3-1,Bd21-3,Bd1-1
Bd1	63344108	63344222	Bd1TE2758265	Bd21,Bd21-3,Bd30-1,Bd3-1,BdTR12c,Koz-3	Bd1-1
Bd1	63347247	63348930	Bd1TE2770242	Bd21,Bd21-3,Bd30-1,Bd3-1,BdTR12c,Koz-3	Bd1-1
Bd1	63535540	63540794	Bd1TE2748012	Bd21,Bd1-1,Bd3-1	Koz-3,Bd21-3,BdTR12c,Bd30-1
Bd1	63647833	63647878	Bd5TE2645998	Bd1-1	Bd21,Bd21-3,Bd30-1,Bd3-1,BdTR12c,Koz-3
Bd1	63687248	63687441	Bd1TE2753289	Bd21,Bd21-3,Bd30-1,Bd3-1,BdTR12c,Koz-3	Bd1-1
Bd1	63718632	63722094	Bd1TE2748396	Bd21,Bd21-3,Bd30-1,Bd3-1,BdTR12c,Koz-3	Bd1-1
Bd1	63898759	63900088	Bd1TE2771051	Bd21,Bd1-1	Koz-3,Bd3-1,Bd21-3,BdTR12c,Bd30-1
Bd1	64223468	64225857	Bd1TE2748830	Bd21,Bd1-1,Bd30-1,Bd3-1,BdTR12c,Koz-3	Bd21-3
Bd1	64226070	64226209	Bd1TE2781402	Bd21,Bd1-1,Bd30-1,Bd3-1,BdTR12c,Koz-3	Bd21-3
Bd1	64226211	64226321	Bd1TE2759268	Bd21,Bd1-1,Bd30-1,Bd3-1,BdTR12c,Koz-3	Bd21-3
Bd1	64259692	64264550	Bd1TE2748093	Bd21,Bd1-1,Bd30-1,Bd3-1,BdTR12c,Koz-3	Bd21-3
Bd1	64445213	64445255	Bd4TE2674131	Bd1-1	Bd21,Bd21-3,Bd30-1,Bd3-1,BdTR12c,Koz-3
Bd1	64461616	64461689	Bd1TE2764768	Bd21,Bd1-1,Bd21-3,Bd3-1,BdTR12c,Koz-3	Bd30-1
Bd1	64499884	64499948	Bd1TE2748277,Bd1TE2753105	Bd30-1	Bd21,Bd1-1,Bd21-3,Bd3-1,BdTR12c,Koz-3
Bd1	64513135	64514183	Bd1TE2771707	Bd21,Bd1-1,Bd21-3,Bd30-1,Bd3-1	Koz-3,BdTR12c
Bd1	64539210	64542844	Bd1TE2768862	Bd21,Bd30-1,Bd3-1,BdTR12c,Koz-3	Bd21-3,Bd1-1
Bd1	64539686	64540791	Bd1TE2771626	Bd21,Bd30-1,Bd3-1,BdTR12c,Koz-3	Bd21-3,Bd1-1
Bd1	64563051	64564649	Bd1TE2749314	Bd21,Bd21-3,Bd3-1	Koz-3,BdTR12c,Bd1-1,Bd30-1
Bd1	64564738	64564808	Bd1TE2786544	Bd21,Bd21-3,Bd3-1	Koz-3,BdTR12c,Bd1-1,Bd30-1
Bd1	64734400	64734524	Bd1TE2755545	Bd21,Bd1-1,Bd21-3,Bd30-1,BdTR12c,Koz-3	Bd3-1
Bd1	64842916	64844245	Bd1TE2771058	Bd21,Bd21-3,Bd3-1,BdTR12c	Koz-3,Bd1-1,Bd30-1
Bd1	64863405	64867266	Bd1TE2748279	Bd21,Bd21-3,Bd30-1,Bd3-1,BdTR12c,Koz-3	Bd1-1
Bd1	64944552	64945262	Bd1TE2772662	Bd21,Bd21-3,Bd30-1,Bd3-1,BdTR12c,Koz-3	Bd1-1
Bd1	65023411	65023500	Bd1TE2762721	Bd21,Bd1-1,Bd21-3,Bd3-1,BdTR12c,Koz-3	Bd30-1
Bd1	65038005	65039330	Bd1TE2771126	Bd21,Bd1-1,Bd21-3,Bd30-1,Bd3-1,BdTR12c	Koz-3
Bd1	65362851	65363028	Bd1TE2753676	Bd21,Bd1-1,Bd30-1,Bd3-1,BdTR12c,Koz-3	Bd21-3
Bd1	65363137	65363246	Bd1TE2759424	Bd21,Bd1-1,Bd30-1,Bd3-1,BdTR12c,Koz-3	Bd21-3
Bd1	65542087	65542935	Bd1TE2772253	Bd21,Bd21-3,Bd30-1,Bd3-1,BdTR12c,Koz-3	Bd1-1
Bd1	65661862	65665522	Bd1TE2767586	Bd21,Bd1-1,Bd30-1,Bd3-1,BdTR12c,Koz-3	Bd21-3
Bd1	65870316	65870443	Bd1TE2755305	Bd21,Bd1-1,Bd21-3,Bd30-1,BdTR12c,Koz-3	Bd3-1
Bd1	65959023	65963188	Bd1TE2748212	Bd21,Bd1-1,Bd30-1,Bd3-1,BdTR12c,Koz-3	Bd21-3
Bd1	66026489	66031089	Bd1TE2767102	Bd21,Bd1-1,Bd3-1,BdTR12c,Koz-3	Bd21-3,Bd30-1
Bd1	66127360	66127487	Bd1TE2754943	Bd21,Bd1-1,Bd21-3,Bd3-1,BdTR12c,Koz-3	Bd30-1
Bd1	66230921	66231001	Bd1TE2785359	Bd1-1	Bd21,Bd21-3,Bd30-1,Bd3-1,BdTR12c,Koz-3
Bd1	66532403	66532438	Bd5TE2639017	Koz-3,Bd30-1	Bd21,Bd1-1,Bd21-3,Bd3-1,BdTR12c
Bd1	66723314	66726161	Bd1TE2768512	Bd21,Bd21-3,Bd30-1,Bd3-1,BdTR12c,Koz-3	Bd1-1
Bd1	66754784	66758861	Bd1TE2748223	Bd21,Bd30-1,Bd3-1,BdTR12c,Koz-3	Bd21-3,Bd1-1
Bd1	66919442	66921381	Bd1TE2749051	Bd21,Bd1-1,Bd30-1,Bd3-1,BdTR12c,Koz-3	Bd21-3
Bd1	67009496	67010257	Bd1TE2772535	Bd21,Bd1-1,Bd21-3,Bd30-1,Bd3-1,BdTR12c	Koz-3
Bd1	67659123	67659304	Bd1TE2753594	Bd21,Bd1-1,Bd30-1,Bd3-1,BdTR12c,Koz-3	Bd21-3
Bd1	67659430	67663645	Bd1TE2748200	Bd21,Bd1-1,Bd30-1,Bd3-1,BdTR12c,Koz-3	Bd21-3
Bd1	67709434	67710484	Bd1TE2771701	Bd21,Bd21-3,Bd30-1,Bd3-1,BdTR12c,Koz-3	Bd1-1
Bd1	68145147	68146011	Bd1TE2772221	Bd21,Bd1-1,Bd21-3,Bd30-1,Bd3-1,Koz-3	BdTR12c
Bd1	68417795	68417889	Bd4TE2678672	Bd30-1	Bd21,Bd1-1,Bd21-3,Bd3-1,BdTR12c,Koz-3
Bd1	68426175	68434508	Bd1TE2766147	Bd21,Bd1-1,Bd30-1,Bd3-1,BdTR12c,Koz-3	Bd21-3
Bd1	68594693	68595573	Bd1TE2772165	Bd21,Bd21-3,Bd30-1,Bd3-1,BdTR12c,Koz-3	Bd1-1
Bd1	68714419	68714483	Bd1TE2787922	Bd21-3,BdTR12c	Bd21,Bd1-1,Bd30-1,Bd3-1,Koz-3
Bd1	68748874	68748922	Bd3TE2704206	Koz-3,Bd3-1,BdTR12c	Bd21,Bd1-1,Bd21-3,Bd30-1
Bd1	69074833	69076170	Bd1TE2770982	Bd21,Bd21-3,Bd30-1,Bd3-1,BdTR12c,Koz-3	Bd1-1
Bd1	69104200	69104281	Bd1TE2772952	Bd1-1	Bd21,Bd21-3,Bd30-1,Bd3-1,BdTR12c,Koz-3
Bd1	69211635	69212990	Bd1TE2770842	Bd21,Bd21-3,Bd30-1,Bd3-1,BdTR12c,Koz-3	Bd1-1
Bd1	69253908	69253956	Bd2TE2721710,Bd2TE2703462	Bd1-1	Bd21,Bd21-3,Bd30-1,Bd3-1,BdTR12c,Koz-3
Bd1	69331328	69331402	Bd1TE2786243	Bd21,Bd30-1,Bd3-1,BdTR12c,Koz-3	Bd21-3,Bd1-1
Bd1	69339893	69339997	Bd1TE2760192	Bd21,Bd30-1,Bd3-1,BdTR12c,Koz-3	Bd21-3,Bd1-1
Bd1	69415452	69415568	Bd1TE2757481	Bd21,Bd1-1,Bd21-3,Bd30-1,BdTR12c,Koz-3	Bd3-1
Bd1	69507529	69510892	Bd1TE2771646	Bd21,Bd21-3,Bd30-1,Bd3-1,BdTR12c,Koz-3	Bd1-1
Bd1	69507930	69509664	Bd1TE2749241	Bd21,Bd21-3,Bd30-1,Bd3-1,BdTR12c,Koz-3	Bd1-1
Bd1	69549756	69549906	Bd1TE2754523	Bd21,Bd1-1,Bd21-3,Bd30-1,BdTR12c,Koz-3	Bd3-1
Bd1	69558198	69559920	Bd1TE2770092	Bd21,Bd21-3,Bd30-1,BdTR12c,Koz-3	Bd3-1,Bd1-1
Bd1	69715104	69716783	Bd1TE2770250	Bd21,Bd21-3,Bd30-1,Koz-3	Bd3-1,BdTR12c,Bd1-1
Bd1	69862421	69862467	Bd4TE2678553	BdTR12c	Bd21,Bd1-1,Bd21-3,Bd30-1,Bd3-1,Koz-3
Bd1	69868399	69868524	Bd1TE2755454	Bd21,Bd21-3,Bd30-1,Bd3-1,BdTR12c,Koz-3	Bd1-1
Bd1	69939041	69940082	Bd1TE2771725	Bd21,Bd1-1,Bd21-3,Bd3-1,BdTR12c,Koz-3	Bd30-1
Bd1	69992785	69995513	Bd1TE2768627	Bd21,Bd21-3,Bd30-1,Bd3-1,BdTR12c,Koz-3	Bd1-1
Bd1	70013089	70017534	Bd1TE2767163	Bd21,Bd1-1,Bd30-1,Bd3-1,BdTR12c,Koz-3	Bd21-3
Bd1	70154943	70159258	Bd1TE2767240	Bd21,Bd30-1,Bd3-1,BdTR12c,Koz-3	Bd21-3,Bd1-1
Bd1	70634933	70638851	Bd1TE2748259	Bd21,Bd1-1,Bd30-1,Bd3-1,BdTR12c,Koz-3	Bd21-3
Bd1	70667882	70673828	Bd1TE2747935	Bd21,Bd21-3,Bd30-1,Bd3-1,BdTR12c,Koz-3	Bd1-1
Bd1	70711065	70715183	Bd1TE2748218	Bd21,Bd30-1,Bd3-1,BdTR12c,Koz-3	Bd21-3,Bd1-1
Bd1	70784594	70784689	Bd1TE2761703	Bd21,Bd21-3,Bd30-1,Bd3-1,BdTR12c,Koz-3	Bd1-1
Bd1	70809717	70809833	Bd1TE2757408	Bd21,Bd1-1,Bd3-1,BdTR12c,Koz-3	Bd21-3,Bd30-1
Bd1	70874351	70874488	Bd1TE2781479	Bd21,Bd21-3,Bd30-1,Bd3-1,BdTR12c,Koz-3	Bd1-1
Bd1	70934508	70936478	Bd1TE2769653	Bd21,Bd1-1,Bd21-3,Bd30-1,Bd3-1,BdTR12c	Koz-3
Bd1	70952274	70952442	Bd1TE2779652	Bd21,Bd21-3,Bd30-1,Bd3-1,BdTR12c,Koz-3	Bd1-1
Bd1	70964231	70965621	Bd1TE2770716	Bd21,Bd1-1,Bd21-3,Bd30-1,Bd3-1	Koz-3,BdTR12c
Bd1	71100967	71101065	Bd1TE2770512	Bd1-1	Bd21,Bd21-3,Bd30-1,Bd3-1,BdTR12c,Koz-3
Bd1	71171249	71171321	Bd1TE2748277,Bd1TE2753105	BdTR12c	Bd21,Bd1-1,Bd21-3,Bd30-1,Bd3-1,Koz-3
Bd1	71241513	71241571	Bd4TE2680060	Bd1-1	Bd21,Bd21-3,Bd30-1,Bd3-1,BdTR12c,Koz-3
Bd1	71369503	71373378	Bd1TE2748270	Bd21,Bd30-1,Bd3-1,BdTR12c,Koz-3	Bd21-3,Bd1-1
Bd1	71521806	71521908	Bd1TE2760397	Bd21,Bd30-1,Bd3-1,BdTR12c,Koz-3	Bd21-3,Bd1-1
Bd1	72042347	72042463	Bd1TE2757521	Bd21,Bd1-1,Bd21-3,Bd3-1	Koz-3,BdTR12c,Bd30-1
Bd1	72160173	72160884	Bd1TE2772660	Bd21,Bd1-1,Bd21-3,Bd3-1	Koz-3,BdTR12c,Bd30-1
Bd1	72168172	72168245	Bd1TE2764835	Bd21,Bd1-1,Bd30-1,Bd3-1,BdTR12c,Koz-3	Bd21-3
Bd1	72179909	72183972	Bd1TE2748277	Bd21,Bd1-1,Bd30-1,Bd3-1,BdTR12c,Koz-3	Bd21-3
Bd1	72180967	72181167	Bd1TE2753105	Bd21	Koz-3,Bd3-1,BdTR12c,Bd21-3,Bd1-1,Bd30-1
Bd1	72184160	72184313	Bd1TE2780582	Bd21,Bd1-1,Bd30-1,Bd3-1,BdTR12c,Koz-3	Bd21-3
Bd1	72294808	72296136	Bd1TE2771075	Bd21,Bd1-1,Bd21-3,Bd3-1	Koz-3,BdTR12c,Bd30-1
Bd1	72351043	72351170	Bd1TE2755091	Bd21,Bd1-1,Bd21-3,Bd30-1,BdTR12c,Koz-3	Bd3-1
Bd1	72413143	72414938	Bd1TE2749176	Bd21,Bd21-3,Bd3-1	Koz-3,BdTR12c,Bd1-1,Bd30-1
Bd1	72738376	72739698	Bd1TE2771159	Bd21,Bd21-3,Bd30-1,Bd3-1,BdTR12c,Koz-3	Bd1-1
Bd1	72802532	72802610	Bd2TE2696463	Bd1-1	Bd21,Bd21-3,Bd30-1,Bd3-1,BdTR12c,Koz-3
Bd1	72918448	72919774	Bd1TE2771015	Bd21,Bd21-3,Bd3-1,BdTR12c,Koz-3	Bd1-1,Bd30-1
Bd1	73013771	73017450	Bd1TE2748322	Bd21,Bd30-1,Bd3-1,BdTR12c,Koz-3	Bd21-3,Bd1-1
Bd1	73017519	73017628	Bd1TE2759462	Bd21,Bd30-1,Bd3-1,BdTR12c,Koz-3	Bd21-3,Bd1-1
Bd1	73105367	73105420	Bd1TE2754584	Koz-3,Bd3-1,Bd21-3	Bd21,Bd1-1,Bd30-1,BdTR12c
Bd1	73481984	73491199	Bd1TE2747690	Bd21,Bd1-1,Bd3-1	Koz-3,Bd21-3,BdTR12c,Bd30-1
Bd1	73492008	73492093	Bd1TE2785283	Bd21,Bd1-1,Bd3-1	Koz-3,Bd21-3,BdTR12c,Bd30-1
Bd1	73497404	73497945	Bd1TE2750643	Bd21,Bd1-1,Bd21-3,Bd30-1,Bd3-1,BdTR12c	Koz-3
Bd1	73511953	73512223	Bd1TE2776650	Bd21,Bd21-3,Bd30-1,Bd3-1,BdTR12c,Koz-3	Bd1-1
Bd1	74117603	74118705	Bd1TE2771632	Bd21,Bd30-1,BdTR12c,Koz-3	Bd3-1,Bd21-3,Bd1-1
Bd1	74430775	74430825	Bd5TE2640914	Bd1-1	Bd21,Bd21-3,Bd30-1,Bd3-1,BdTR12c,Koz-3
Bd1	74608358	74612486	Bd1TE2767334	Bd21	Koz-3,Bd3-1,BdTR12c,Bd21-3,Bd1-1,Bd30-1
Bd1	74669929	74670096	Bd1TE2779751	Bd21,Bd1-1,Bd21-3,Bd3-1,BdTR12c,Koz-3	Bd30-1
Bd1	74670233	74670297	Bd1TE2787143	Bd21,Bd1-1,Bd21-3,Bd3-1,BdTR12c,Koz-3	Bd30-1
Bd1	74670298	74674032	Bd1TE2768618	Bd21,Bd1-1,Bd21-3,Bd3-1,BdTR12c,Koz-3	Bd30-1
Bd1	74706386	74706794	Bd1TE2774867	Bd21,Bd1-1,Bd30-1,Bd3-1,BdTR12c,Koz-3	Bd21-3
Bd1	74708470	74711837	Bd1TE2748456	Bd21,Bd30-1,Bd3-1,BdTR12c,Koz-3	Bd21-3,Bd1-1
Bd1	74712219	74713938	Bd1TE2770106	Bd21,Bd30-1,Bd3-1,BdTR12c,Koz-3	Bd21-3,Bd1-1
Bd1	74715607	74718578	Bd1TE2768368	Bd21,Bd30-1,Bd3-1,BdTR12c,Koz-3	Bd21-3,Bd1-1
Bd2	386678	387398	Bd2TE2715613	Bd21,Bd1-1,Bd21-3,Bd3-1	Koz-3,BdTR12c,Bd30-1
Bd2	652346	652485	Bd2TE2722490	Bd21,Bd1-1,Bd30-1,Bd3-1,BdTR12c,Koz-3	Bd21-3
Bd2	652654	654172	Bd2TE2718281	Bd21,Bd1-1,Bd30-1,Bd3-1,BdTR12c,Koz-3	Bd21-3
Bd2	801362	806609	Bd2TE2694257	Bd21,Bd3-1	Koz-3,Bd21-3,Bd1-1,BdTR12c,Bd30-1
Bd2	1119615	1124611	Bd2TE2694326	Bd21,Bd1-1	Koz-3,Bd3-1,Bd21-3,BdTR12c,Bd30-1
Bd2	1125924	1131326	Bd2TE2694228	Bd21,Bd1-1,Bd3-1,Koz-3	Bd21-3,BdTR12c,Bd30-1
Bd2	1133673	1135017	Bd2TE2713014	Bd21,Bd1-1	Koz-3,Bd3-1,Bd21-3,BdTR12c,Bd30-1
Bd2	1141218	1145543	Bd2TE2694415	Bd21,Bd1-1,Bd30-1,Bd3-1,BdTR12c,Koz-3	Bd21-3
Bd2	1145743	1145983	Bd2TE2697688	Bd21,Bd1-1,Bd30-1,Bd3-1	Koz-3,Bd21-3,BdTR12c
Bd2	1153999	1154126	Bd2TE2699933	Bd21,Bd1-1,Bd30-1,Koz-3	Bd3-1,Bd21-3,BdTR12c
Bd2	1154491	1159885	Bd2TE2694230	Bd21,Bd1-1	Koz-3,Bd3-1,Bd21-3,BdTR12c,Bd30-1
Bd2	1202100	1202150	Bd2TE2725189	Bd21,Bd1-1	Koz-3,Bd3-1,Bd21-3,BdTR12c,Bd30-1
Bd2	1202151	1207673	Bd2TE2709160	Bd21,Bd1-1	Koz-3,Bd3-1,Bd21-3,BdTR12c,Bd30-1
Bd2	1222835	1223777	Bd2TE2695820	Bd21	Koz-3,Bd3-1,BdTR12c,Bd21-3,Bd1-1,Bd30-1
Bd2	1455408	1455550	Bd2TE2722409	Bd21,Bd21-3,Bd3-1	Koz-3,BdTR12c,Bd1-1,Bd30-1
Bd2	1455554	1460393	Bd2TE2710107	Bd21,Bd1-1,Bd21-3,Bd3-1	Koz-3,BdTR12c,Bd30-1
Bd2	1455717	1457067	Bd2TE2712978	Bd21,Bd21-3,Bd3-1	Koz-3,BdTR12c,Bd1-1,Bd30-1
Bd2	1517348	1519062	Bd2TE2712267	Bd21,Bd21-3,Bd3-1	Koz-3,BdTR12c,Bd1-1,Bd30-1
Bd2	1699961	1701503	Bd2TE2719338	Bd21,Bd1-1,Bd30-1,Bd3-1,BdTR12c,Koz-3	Bd21-3
Bd2	1701374	1701488	Bd2TE2702542	Bd21,Bd1-1,Bd30-1,Bd3-1,BdTR12c,Koz-3	Bd21-3
Bd2	1710415	1710527	Bd2TE2723202	Bd21,Bd1-1,Bd21-3,Bd3-1,BdTR12c	Koz-3,Bd30-1
Bd2	1748184	1751746	Bd2TE2710657	Bd21,Bd21-3,Bd30-1,Bd3-1,BdTR12c,Koz-3	Bd1-1
Bd2	1779214	1783701	Bd2TE2694397	Bd21,Bd1-1,Bd30-1,Bd3-1,BdTR12c,Koz-3	Bd21-3
Bd2	1783702	1784438	Bd2TE2696091	Bd21,Bd30-1,Bd3-1,BdTR12c,Koz-3	Bd21-3,Bd1-1
Bd2	1854666	1858964	Bd2TE2694421	Bd21,Bd1-1,Bd30-1,Bd3-1,BdTR12c,Koz-3	Bd21-3
Bd2	2262257	2262306	Bd1TE2782029	Koz-3	Bd21,Bd1-1,Bd21-3,Bd30-1,Bd3-1,BdTR12c
Bd2	2336859	2337814	Bd2TE2714422	Bd21,Bd21-3,Bd30-1,Bd3-1,BdTR12c,Koz-3	Bd1-1
Bd2	2385066	2385355	Bd2TE2718886	Bd21,Bd1-1,Bd30-1,Bd3-1,BdTR12c,Koz-3	Bd21-3
Bd2	2385356	2385711	Bd2TE2718180	Bd21,Bd1-1,Bd30-1,Bd3-1,BdTR12c,Koz-3	Bd21-3
Bd2	2627428	2628581	Bd2TE2713669	Bd21,Bd1-1,Bd21-3,Bd3-1,BdTR12c,Koz-3	Bd30-1
Bd2	2980115	2985751	Bd2TE2694200	Bd21,Bd21-3,Bd30-1,Bd3-1	Koz-3,BdTR12c,Bd1-1
Bd2	3520611	3520683	Bd2TE2707716	Bd21,Bd21-3,Bd30-1,Bd3-1,BdTR12c,Koz-3	Bd1-1
Bd2	3651511	3651570	Bd1TE2778751	Koz-3	Bd21,Bd1-1,Bd21-3,Bd30-1,Bd3-1,BdTR12c
Bd2	3701738	3703077	Bd2TE2713054	Bd21,Bd1-1,Bd21-3,Bd3-1,BdTR12c	Koz-3,Bd30-1
Bd2	3732894	3732942	Bd3TE2716801	Bd1-1	Bd21,Bd21-3,Bd30-1,Bd3-1,BdTR12c,Koz-3
Bd2	3839941	3839982	Bd2TE2725016	Bd21-3	Bd21,Bd1-1,Bd30-1,Bd3-1,BdTR12c,Koz-3
Bd2	3907984	3908035	Bd3TE2690369	Bd1-1	Bd21,Bd21-3,Bd30-1,Bd3-1,BdTR12c,Koz-3
Bd2	4190601	4190715	Bd2TE2702602	Bd21,Bd30-1,Bd3-1,BdTR12c,Koz-3	Bd21-3,Bd1-1
Bd2	4190772	4194676	Bd2TE2722952	Bd21,Bd30-1,Bd3-1,BdTR12c,Koz-3	Bd21-3,Bd1-1
Bd2	4192597	4192714	Bd2TE2700916	Bd21,Bd30-1,Bd3-1,BdTR12c,Koz-3	Bd21-3,Bd1-1
Bd2	4194677	4194756	Bd2TE2707256	Bd21,Bd30-1,Bd3-1,BdTR12c,Koz-3	Bd21-3,Bd1-1
Bd2	4579318	4580663	Bd2TE2713000	Bd21,Bd3-1	Koz-3,Bd21-3,Bd1-1,BdTR12c,Bd30-1
Bd2	4694790	4694869	Bd2TE2707216	Bd21,Bd21-3,Bd30-1,Bd3-1,BdTR12c,Koz-3	Bd1-1
Bd2	4734705	4740741	Bd2TE2694168	Bd21,Bd21-3,Bd30-1,Bd3-1,BdTR12c,Koz-3	Bd1-1
Bd2	4828978	4830323	Bd2TE2713008	Bd21,Bd1-1,Bd21-3,Bd30-1,Bd3-1,BdTR12c	Koz-3
Bd2	5189424	5189541	Bd2TE2700942	Bd21,Bd1-1,Bd30-1,Bd3-1,BdTR12c,Koz-3	Bd21-3
Bd2	5189640	5189862	Bd2TE2697976	Bd21,Bd1-1,Bd30-1,Bd3-1,BdTR12c,Koz-3	Bd21-3
Bd2	5337668	5337795	Bd2TE2699946	Bd21,Bd21-3,Bd30-1,Bd3-1,BdTR12c,Koz-3	Bd1-1
Bd2	5499029	5502272	Bd2TE2694660	Bd21,Bd21-3,Bd30-1,Bd3-1,BdTR12c,Koz-3	Bd1-1
Bd2	5628516	5628777	Bd2TE2697315	Bd21,Bd21-3,Bd30-1,Bd3-1,BdTR12c,Koz-3	Bd1-1
Bd2	5636153	5636333	Bd2TE2720849	Bd21,Bd21-3,Bd30-1,Bd3-1,BdTR12c	Koz-3,Bd1-1
Bd2	5907840	5911449	Bd2TE2694547	Bd21,Bd30-1,Bd3-1,BdTR12c,Koz-3	Bd21-3,Bd1-1
Bd2	5977692	5981595	Bd2TE2694478	Bd21,Bd1-1,Bd30-1,Bd3-1,BdTR12c,Koz-3	Bd21-3
Bd2	6044989	6045155	Bd2TE2721469	Bd21,Bd30-1,Bd3-1,BdTR12c,Koz-3	Bd21-3,Bd1-1
Bd2	6044995	6045111	Bd2TE2701960	Bd21,Bd30-1,Bd3-1,BdTR12c,Koz-3	Bd21-3,Bd1-1
Bd2	6045167	6045255	Bd2TE2706113	Bd21,Bd30-1,Bd3-1,BdTR12c,Koz-3	Bd21-3,Bd1-1
Bd2	6159018	6159110	Bd4TE2672263	Bd1-1	Bd21,Bd21-3,Bd30-1,Bd3-1,BdTR12c,Koz-3
Bd2	6172515	6172591	Bd2TE2724252	Bd21,Bd1-1,Bd30-1,Bd3-1,BdTR12c,Koz-3	Bd21-3
Bd2	6181859	6185357	Bd2TE2694586	Bd21,Bd30-1,Bd3-1,BdTR12c,Koz-3	Bd21-3,Bd1-1
Bd2	6240954	6243304	Bd2TE2711280	Bd21,Bd21-3,Bd30-1,Bd3-1,BdTR12c,Koz-3	Bd1-1
Bd2	6243438	6246476	Bd2TE2710626	Bd21,Bd21-3,Bd30-1,Bd3-1,BdTR12c,Koz-3	Bd1-1
Bd2	6246477	6249181	Bd2TE2710894	Bd21,Bd21-3,Bd30-1,Bd3-1,BdTR12c,Koz-3	Bd1-1
Bd2	6249182	6249644	Bd2TE2717256	Bd21,Bd30-1,Bd3-1,BdTR12c,Koz-3	Bd21-3,Bd1-1
Bd2	6249645	6252193	Bd2TE2711057	Bd21,Bd30-1,Bd3-1,BdTR12c,Koz-3	Bd21-3,Bd1-1
Bd2	6252428	6255232	Bd2TE2710761	Bd21,Bd21-3,Bd30-1,Bd3-1,BdTR12c,Koz-3	Bd1-1
Bd2	6257907	6258173	Bd2TE2697290	Bd21,Bd30-1,Bd3-1,BdTR12c,Koz-3	Bd21-3,Bd1-1
Bd2	6371522	6371563	Bd1TE2788201	Bd1-1	Bd21,Bd21-3,Bd30-1,Bd3-1,BdTR12c,Koz-3
Bd2	6394024	6394180	Bd2TE2721917	Bd21,Bd21-3,Bd30-1,Bd3-1,BdTR12c,Koz-3	Bd1-1
Bd2	6411756	6411963	Bd2TE2719332	Bd21,Bd1-1,Bd30-1,Bd3-1,BdTR12c,Koz-3	Bd21-3
Bd2	6411964	6415564	Bd2TE2694549	Bd21,Bd1-1,Bd30-1,Bd3-1,BdTR12c,Koz-3	Bd21-3
Bd2	6543835	6547870	Bd2TE2694456	Bd21,Bd30-1,Bd3-1,BdTR12c,Koz-3	Bd21-3,Bd1-1
Bd2	6683794	6683921	Bd2TE2700082	Bd21,Bd1-1,Bd21-3,Bd30-1,BdTR12c,Koz-3	Bd3-1
Bd2	6841080	6842675	Bd2TE2695294	Bd21,Bd1-1,Bd30-1,Bd3-1,BdTR12c,Koz-3	Bd21-3
Bd2	6877343	6877459	Bd2TE2700981	Bd21,Bd1-1,Bd30-1,Bd3-1,BdTR12c,Koz-3	Bd21-3
Bd2	7017506	7018825	Bd2TE2713211	Bd21,Bd1-1,Bd21-3,Bd30-1,Bd3-1,BdTR12c	Koz-3
Bd2	7073169	7074343	Bd2TE2713631	Bd21,Bd30-1	Koz-3,Bd3-1,Bd21-3,Bd1-1,BdTR12c
Bd2	7517639	7517823	Bd2TE2720835	Bd21,Bd21-3,Bd30-1,Bd3-1,BdTR12c,Koz-3	Bd1-1
Bd2	7609397	7609432	Bd3TE2692509	Bd3-1	Bd21,Bd1-1,Bd21-3,Bd30-1,BdTR12c,Koz-3
Bd2	7652818	7654147	Bd2TE2712984	Bd21,Bd1-1,Bd21-3,Bd30-1,Bd3-1	Koz-3,BdTR12c
Bd2	7716952	7717046	Bd2TE2705334	Bd21,Bd1-1,Bd30-1	Koz-3,Bd3-1,Bd21-3,BdTR12c
Bd2	7720807	7721426	Bd2TE2696241	Bd21,Bd21-3,Bd30-1,Bd3-1,BdTR12c,Koz-3	Bd1-1
Bd2	7721679	7734931	Bd2TE2693844	Bd21,Bd30-1,Bd3-1,BdTR12c	Koz-3,Bd21-3,Bd1-1
Bd2	7763876	7765541	Bd2TE2712369	Bd21,BdTR12c	Koz-3,Bd3-1,Bd21-3,Bd1-1,Bd30-1
Bd2	7767616	7767732	Bd2TE2701823	Bd21,Bd1-1,Bd3-1,BdTR12c	Koz-3,Bd21-3,Bd30-1
Bd2	7826701	7828982	Bd2TE2694935	Bd21,Bd30-1,Bd3-1,BdTR12c,Koz-3	Bd21-3,Bd1-1
Bd2	7892562	7893969	Bd2TE2712777	Bd21	Koz-3,Bd3-1,BdTR12c,Bd21-3,Bd1-1,Bd30-1
Bd2	8008794	8010144	Bd2TE2712974	Bd21,Bd1-1,Bd30-1	Koz-3,Bd3-1,Bd21-3,BdTR12c
Bd2	8244362	8244480	Bd2TE2700763	Bd21,Bd1-1,Bd30-1,Bd3-1,BdTR12c,Koz-3	Bd21-3
Bd2	8535070	8536114	Bd2TE2713947	Bd21,Bd21-3,Bd30-1,Bd3-1,BdTR12c,Koz-3	Bd1-1
Bd2	8567882	8568190	Bd2TE2715973	Bd21,Bd21-3,Bd30-1,Bd3-1,BdTR12c,Koz-3	Bd1-1
Bd2	8814134	8815463	Bd2TE2713094	Bd21,Bd21-3,Bd30-1,Bd3-1,BdTR12c,Koz-3	Bd1-1
Bd2	8831913	8832533	Bd2TE2716133	Bd21,Bd30-1,Bd3-1,BdTR12c,Koz-3	Bd21-3,Bd1-1
Bd2	8832534	8833223	Bd2TE2715771	Bd21,Bd30-1,Bd3-1,BdTR12c,Koz-3	Bd21-3,Bd1-1
Bd2	8833224	8835468	Bd2TE2711434	Bd21,Bd1-1,Bd30-1,Bd3-1,BdTR12c,Koz-3	Bd21-3
Bd2	8940537	8944338	Bd2TE2709923	Bd21,Bd30-1,Bd3-1,BdTR12c,Koz-3	Bd21-3,Bd1-1
Bd2	8958512	8962994	Bd2TE2694399	Bd21,Bd30-1,Bd3-1,BdTR12c,Koz-3	Bd21-3,Bd1-1
Bd2	9228115	9228742	Bd2TE2716303	Bd21,Bd30-1,BdTR12c,Koz-3	Bd3-1,Bd21-3,Bd1-1
Bd2	9309661	9309827	Bd2TE2699144	Bd21,Bd1-1,Bd21-3,Bd3-1,BdTR12c,Koz-3	Bd30-1
Bd2	9309871	9313214	Bd2TE2710240	Bd21,Bd1-1,Bd21-3,Bd3-1,BdTR12c,Koz-3	Bd30-1
Bd2	9318213	9318340	Bd2TE2699976	Bd21,Bd1-1,Bd21-3,Bd30-1,BdTR12c,Koz-3	Bd3-1
Bd2	9353852	9358376	Bd2TE2694389	Bd21,Bd1-1,Bd30-1,Bd3-1,BdTR12c,Koz-3	Bd21-3
Bd2	9408205	9412327	Bd2TE2694439	Bd21,Bd1-1,Bd30-1,Bd3-1,BdTR12c,Koz-3	Bd21-3
Bd2	9505671	9509241	Bd2TE2694553	Bd21,Bd1-1,Bd30-1,Bd3-1,BdTR12c,Koz-3	Bd21-3
Bd2	9509242	9509372	Bd2TE2718916	Bd21,Bd30-1,Bd3-1,BdTR12c,Koz-3	Bd21-3,Bd1-1
Bd2	9656545	9656620	Bd5TE2642304	Bd1-1	Bd21,Bd21-3,Bd30-1,Bd3-1,BdTR12c,Koz-3
Bd2	10090323	10090445	Bd2TE2700408	Bd21,Bd21-3,Bd30-1,Bd3-1,BdTR12c,Koz-3	Bd1-1
Bd2	10198606	10202623	Bd2TE2694460	Bd21,Bd1-1,Bd30-1,Bd3-1,BdTR12c,Koz-3	Bd21-3
Bd2	10287787	10287862	Bd2TE2724295	Bd21,Bd21-3,Bd30-1,Bd3-1,BdTR12c,Koz-3	Bd1-1
Bd2	10288022	10288203	Bd2TE2698756	Bd21,Bd21-3,Bd30-1,Bd3-1,BdTR12c,Koz-3	Bd1-1
Bd2	10288595	10292371	Bd2TE2694503	Bd21,Bd1-1,Bd30-1,Bd3-1,BdTR12c,Koz-3	Bd21-3
Bd2	10292701	10292945	Bd2TE2697556	Bd21,Bd1-1,Bd30-1,Bd3-1,BdTR12c,Koz-3	Bd21-3
Bd2	10508106	10511931	Bd2TE2694491	Bd21,Bd1-1,Bd30-1,Bd3-1,BdTR12c,Koz-3	Bd21-3
Bd2	10536813	10539573	Bd2TE2710820	Bd21,Bd21-3,Bd30-1,Bd3-1,BdTR12c,Koz-3	Bd1-1
Bd2	10539574	10545349	Bd2TE2709092	Bd21,Bd21-3,Bd30-1,Bd3-1,BdTR12c,Koz-3	Bd1-1
Bd2	10545351	10545977	Bd2TE2716105	Bd21,Bd21-3,Bd30-1,Bd3-1,BdTR12c,Koz-3	Bd1-1
Bd2	10545978	10546884	Bd2TE2714645	Bd21,Bd21-3,Bd30-1,Bd3-1,BdTR12c,Koz-3	Bd1-1
Bd2	10563634	10564772	Bd2TE2695637	Bd21,Bd1-1,Bd30-1,Bd3-1,BdTR12c,Koz-3	Bd21-3
Bd2	10694564	10695907	Bd2TE2713024	Bd21,Bd1-1	Koz-3,Bd3-1,Bd21-3,BdTR12c,Bd30-1
Bd2	10818316	10818497	Bd2TE2698762	Bd21,Bd30-1,Bd3-1,BdTR12c,Koz-3	Bd21-3,Bd1-1
Bd2	10821432	10821515	Bd2TE2706898	Bd21,Bd30-1,Bd3-1,BdTR12c,Koz-3	Bd21-3,Bd1-1
Bd2	10821559	10821637	Bd2TE2707342	Bd21,Bd30-1,Bd3-1,BdTR12c,Koz-3	Bd21-3,Bd1-1
Bd2	11129186	11133816	Bd2TE2722569	Bd21,Bd1-1,Bd30-1,Bd3-1,BdTR12c,Koz-3	Bd21-3
Bd2	11129188	11129260	Bd2TE2707720	Bd21,Bd30-1,Bd3-1,BdTR12c,Koz-3	Bd21-3,Bd1-1
Bd2	11133033	11133129	Bd2TE2723655	Bd21,Bd30-1,Bd3-1,BdTR12c,Koz-3	Bd21-3,Bd1-1
Bd2	11133200	11133613	Bd2TE2717712	Bd21,Bd30-1,Bd3-1,BdTR12c,Koz-3	Bd21-3,Bd1-1
Bd2	11134428	11134544	Bd2TE2701054	Bd21,Bd1-1,Bd30-1,Bd3-1,BdTR12c,Koz-3	Bd21-3
Bd2	11246071	11249686	Bd2TE2694545	Bd21,Bd21-3,Bd30-1,Bd3-1,BdTR12c,Koz-3	Bd1-1
Bd2	11251560	11254795	Bd2TE2710430	Bd21,Bd21-3,Bd30-1,BdTR12c	Koz-3,Bd3-1,Bd1-1
Bd2	11300593	11304671	Bd2TE2709774	Bd21,Bd1-1,Bd30-1,Bd3-1,BdTR12c,Koz-3	Bd21-3
Bd2	11304740	11304846	Bd2TE2703644	Bd21,Bd1-1,Bd30-1,Bd3-1,BdTR12c,Koz-3	Bd21-3
Bd2	11393516	11393641	Bd2TE2700282	Bd21,Bd1-1,Bd3-1,BdTR12c,Koz-3	Bd21-3,Bd30-1
Bd2	11395885	11397239	Bd2TE2712944	Bd21,Bd1-1,Bd3-1,BdTR12c,Koz-3	Bd21-3,Bd30-1
Bd2	11408849	11413575	Bd2TE2709461	Bd21,Bd1-1,Bd30-1,Bd3-1,BdTR12c,Koz-3	Bd21-3
Bd2	11481666	11483334	Bd2TE2712361	Bd21,Bd21-3,Bd30-1,Bd3-1,BdTR12c,Koz-3	Bd1-1
Bd2	11544366	11546292	Bd2TE2711889	Bd21,Bd21-3,Bd30-1,Bd3-1,BdTR12c,Koz-3	Bd1-1
Bd2	11726455	11726635	Bd2TE2698785	Bd21,Bd21-3,Bd30-1,Bd3-1,BdTR12c,Koz-3	Bd1-1
Bd2	11727413	11727572	Bd2TE2721766	Bd21,Bd21-3,Bd30-1,Bd3-1,BdTR12c,Koz-3	Bd1-1
Bd2	11743563	11745193	Bd2TE2712409	Bd21,Bd21-3,Bd30-1,Bd3-1,BdTR12c,Koz-3	Bd1-1
Bd2	11745883	11747252	Bd2TE2712871	Bd21,Bd21-3,Bd30-1,Bd3-1,BdTR12c,Koz-3	Bd1-1
Bd2	11747253	11747606	Bd2TE2718195	Bd21,Bd21-3,Bd30-1,Bd3-1,BdTR12c,Koz-3	Bd1-1
Bd2	11747607	11747718	Bd2TE2723221	Bd21,Bd21-3,Bd30-1,Bd3-1,BdTR12c,Koz-3	Bd1-1
Bd2	11747719	11748423	Bd2TE2715679	Bd21,Bd21-3,Bd30-1,Bd3-1,BdTR12c,Koz-3	Bd1-1
Bd2	11748795	11749656	Bd2TE2714901	Bd21,Bd21-3,Bd30-1,Bd3-1,BdTR12c,Koz-3	Bd1-1
Bd2	11793118	11793213	Bd2TE2712369	Bd1-1	Bd21,Bd21-3,Bd30-1,Bd3-1,BdTR12c,Koz-3
Bd2	12070976	12071256	Bd2TE2719010	Bd21,Bd1-1,Bd21-3,Bd30-1,BdTR12c,Koz-3	Bd3-1
Bd2	12071532	12071823	Bd2TE2718870	Bd21,Bd1-1,Bd21-3,Bd30-1,BdTR12c,Koz-3	Bd3-1
Bd2	12146071	12146117	Bd2TE2713109	Bd1-1	Bd21,Bd21-3,Bd30-1,Bd3-1,BdTR12c,Koz-3
Bd2	12224426	12224524	Bd1TE2771043	Bd1-1	Bd21,Bd21-3,Bd30-1,Bd3-1,BdTR12c,Koz-3
Bd2	12230947	12231882	Bd2TE2714517	Bd21,Bd21-3,Bd30-1,Bd3-1,BdTR12c,Koz-3	Bd1-1
Bd2	12231883	12232084	Bd2TE2720422	Bd21,Bd21-3,Bd30-1,Bd3-1,BdTR12c,Koz-3	Bd1-1
Bd2	12232085	12235281	Bd2TE2710474	Bd21,Bd21-3,Bd30-1,Bd3-1,BdTR12c,Koz-3	Bd1-1
Bd2	12235282	12235409	Bd2TE2722828	Bd21,Bd21-3,Bd30-1,Bd3-1,BdTR12c,Koz-3	Bd1-1
Bd2	12308348	12309916	Bd2TE2712495	Bd21,Bd1-1,Bd21-3,Bd30-1,Bd3-1,Koz-3	BdTR12c
Bd2	12388811	12390136	Bd2TE2713092	Bd21,Bd21-3,Bd30-1,Bd3-1,BdTR12c,Koz-3	Bd1-1
Bd2	12541426	12545807	Bd2TE2694727	Bd21,Bd1-1,Bd30-1,Bd3-1,BdTR12c,Koz-3	Bd21-3
Bd2	12541602	12542968	Bd2TE2712883	Bd21,Bd30-1,Bd3-1,BdTR12c,Koz-3	Bd21-3,Bd1-1
Bd2	12676488	12676532	Bd3TE2707376	BdTR12c	Bd21,Bd1-1,Bd21-3,Bd30-1,Bd3-1,Koz-3
Bd2	12718546	12720638	Bd2TE2711648	Bd21,Bd21-3,Bd30-1,Bd3-1,BdTR12c,Koz-3	Bd1-1
Bd2	12720661	12722016	Bd2TE2712936	Bd21,Bd21-3,Bd30-1,Bd3-1	Koz-3,BdTR12c,Bd1-1
Bd2	12722017	12723197	Bd2TE2713612	Bd21,Bd21-3,Bd30-1,Bd3-1,BdTR12c,Koz-3	Bd1-1
Bd2	12773131	12773217	Bd4TE2672078	Bd21-3	Bd21,Bd1-1,Bd30-1,Bd3-1,BdTR12c,Koz-3
Bd2	12775199	12775278	Bd2TE2707290	Bd21,Bd21-3,Bd30-1,Bd3-1,BdTR12c,Koz-3	Bd1-1
Bd2	13169287	13169330	Bd2TE2694145	Bd30-1	Bd21,Bd1-1,Bd21-3,Bd3-1,BdTR12c,Koz-3
Bd2	13192484	13193777	Bd2TE2713105	Bd21,BdTR12c,Koz-3	Bd3-1,Bd21-3,Bd1-1,Bd30-1
Bd2	13221520	13221669	Bd2TE2722193	Bd21,Bd21-3,Bd3-1,BdTR12c,Koz-3	Bd1-1,Bd30-1
Bd2	13234194	13234399	Bd2TE2720333	Bd21,Bd21-3,Bd30-1,Bd3-1,BdTR12c,Koz-3	Bd1-1
Bd2	13477073	13477186	Bd2TE2702753	Bd21,Bd1-1,Bd30-1,Bd3-1,BdTR12c	Koz-3,Bd21-3
Bd2	13510212	13513890	Bd2TE2709987	Bd21,Bd21-3,Bd30-1,Bd3-1,BdTR12c,Koz-3	Bd1-1
Bd2	13513891	13514952	Bd2TE2713884	Bd21,Bd30-1,Bd3-1	Koz-3,Bd21-3,Bd1-1,BdTR12c
Bd2	13523553	13524589	Bd2TE2713992	Bd21,Bd30-1,Bd3-1,BdTR12c,Koz-3	Bd21-3,Bd1-1
Bd2	13524590	13529459	Bd2TE2709395	Bd21,Bd21-3,Bd30-1,Bd3-1,BdTR12c,Koz-3	Bd1-1
Bd2	13534128	13534759	Bd2TE2716075	Bd21,Bd21-3,Bd30-1,Bd3-1,BdTR12c,Koz-3	Bd1-1
Bd2	13616827	13616942	Bd2TE2702162	Bd21,Bd1-1,Bd3-1,BdTR12c	Koz-3,Bd21-3,Bd30-1
Bd2	14086829	14086993	Bd2TE2721563	Bd21,Bd1-1,Bd30-1,Bd3-1,BdTR12c,Koz-3	Bd21-3
Bd2	14101707	14103662	Bd2TE2711839	Bd21,Bd1-1,Bd30-1,Bd3-1,BdTR12c,Koz-3	Bd21-3
Bd2	14287127	14287209	Bd2TE2724085	Bd21,Bd1-1,Bd21-3,Bd30-1,Bd3-1,Koz-3	BdTR12c
Bd2	14287219	14288419	Bd2TE2713537	Bd21,Bd1-1,Bd21-3,Bd30-1,Bd3-1,Koz-3	BdTR12c
Bd2	14340857	14340952	Bd2TE2705240	Bd21,Bd1-1,Bd30-1,Bd3-1,BdTR12c,Koz-3	Bd21-3
Bd2	14659039	14659074	Bd1TE2778664	Bd30-1	Bd21,Bd1-1,Bd21-3,Bd3-1,BdTR12c,Koz-3
Bd2	14670092	14671676	Bd2TE2695298	Bd21,Bd1-1,Bd30-1,Bd3-1,BdTR12c,Koz-3	Bd21-3
Bd2	14703519	14704876	Bd2TE2712891	Bd21,Bd21-3,Bd30-1,Bd3-1,BdTR12c,Koz-3	Bd1-1
Bd2	14871498	14875809	Bd2TE2710961	Bd21,Bd21-3,Bd30-1,Bd3-1,BdTR12c,Koz-3	Bd1-1
Bd2	14872738	14873116	Bd2TE2718800	Bd21,Bd21-3,Bd30-1,Bd3-1,BdTR12c,Koz-3	Bd1-1
Bd2	14873117	14873760	Bd2TE2716007	Bd21,Bd21-3,Bd30-1,Bd3-1,BdTR12c,Koz-3	Bd1-1
Bd2	14873984	14874079	Bd2TE2723675	Bd21,Bd21-3,Bd30-1,Bd3-1,BdTR12c,Koz-3	Bd1-1
Bd2	14884105	14884389	Bd2TE2718962	Bd21,Bd1-1,Bd21-3,Bd30-1,Bd3-1,BdTR12c	Koz-3
Bd2	14890184	14891060	Bd2TE2714821	Bd21,Bd1-1,Bd30-1,Bd3-1,BdTR12c,Koz-3	Bd21-3
Bd2	14996237	15000412	Bd2TE2694433	Bd21,Bd30-1,Bd3-1,BdTR12c,Koz-3	Bd21-3,Bd1-1
Bd2	15006753	15009651	Bd2TE2710703	Bd21,Bd1-1,Bd21-3,Bd3-1,BdTR12c,Koz-3	Bd30-1
Bd2	15009652	15010095	Bd2TE2717434	Bd21,Bd21-3,Bd3-1,BdTR12c,Koz-3	Bd1-1,Bd30-1
Bd2	15014231	15015557	Bd2TE2713142	Bd21,Bd21-3,Bd3-1,BdTR12c,Koz-3	Bd1-1,Bd30-1
Bd2	15018544	15020990	Bd2TE2711182	Bd21,Bd3-1	Koz-3,Bd21-3,Bd1-1,BdTR12c,Bd30-1
Bd2	15020991	15022191	Bd2TE2713539	Bd21,Bd21-3,Bd30-1,Bd3-1,BdTR12c,Koz-3	Bd1-1
Bd2	15022299	15022996	Bd2TE2715721	Bd21,Bd21-3,Bd30-1,Bd3-1,BdTR12c,Koz-3	Bd1-1
Bd2	15053493	15054488	Bd2TE2714214	Bd21,Bd21-3,Bd30-1,Bd3-1,BdTR12c,Koz-3	Bd1-1
Bd2	15150878	15151985	Bd2TE2713767	Bd21,Bd21-3,Bd30-1,Bd3-1,BdTR12c,Koz-3	Bd1-1
Bd2	15159266	15160038	Bd2TE2715871	Bd21,Bd21-3,Bd30-1,Bd3-1,BdTR12c,Koz-3	Bd1-1
Bd2	15160797	15161279	Bd2TE2722095	Bd21,Bd21-3,Bd30-1,Bd3-1,BdTR12c,Koz-3	Bd1-1
Bd2	15171847	15172024	Bd2TE2698877	Bd21,Bd21-3,Bd30-1,Bd3-1,BdTR12c,Koz-3	Bd1-1
Bd2	15173278	15188041	Bd2TE2693803	Bd21,Bd21-3,Bd30-1,Bd3-1,BdTR12c,Koz-3	Bd1-1
Bd2	15207930	15209707	Bd2TE2695198	Bd21,Bd1-1,Bd30-1,Bd3-1,BdTR12c,Koz-3	Bd21-3
Bd2	15268798	15268991	Bd2TE2698525	Bd21,Bd1-1,Bd21-3,Bd3-1,BdTR12c,Koz-3	Bd30-1
Bd2	15281303	15281384	Bd2TE2707067	Bd21,Bd21-3,Bd3-1,BdTR12c,Koz-3	Bd1-1,Bd30-1
Bd2	15438675	15438822	Bd2TE2699585	Bd21,Bd1-1,Bd21-3,Bd30-1,BdTR12c,Koz-3	Bd3-1
Bd2	15496157	15496223	Bd2TE2724643	Bd21,Bd21-3,Bd30-1,Bd3-1,BdTR12c,Koz-3	Bd1-1
Bd2	15501707	15504924	Bd2TE2710448	Bd21,Bd21-3,Bd30-1,Bd3-1,BdTR12c,Koz-3	Bd1-1
Bd2	15601082	15601300	Bd2TE2698048	Bd21,Bd21-3,Bd3-1,BdTR12c,Koz-3	Bd1-1,Bd30-1
Bd2	15605487	15606811	Bd2TE2713138	Bd21,Bd21-3,Bd30-1,Bd3-1	Koz-3,BdTR12c,Bd1-1
Bd2	15630511	15631853	Bd2TE2713034	Bd21,Bd21-3,Bd3-1,BdTR12c,Koz-3	Bd1-1,Bd30-1
Bd2	15732201	15733513	Bd2TE2713167	Bd21,Bd30-1,Bd3-1,BdTR12c,Koz-3	Bd21-3,Bd1-1
Bd2	15958906	15959653	Bd2TE2715519	Bd21,Bd21-3,Bd3-1,BdTR12c,Koz-3	Bd1-1,Bd30-1
Bd2	15982778	15982862	Bd5TE2641725	Bd30-1	Bd21,Bd1-1,Bd21-3,Bd3-1,BdTR12c,Koz-3
Bd2	16115752	16120357	Bd2TE2709605	Bd21,Bd1-1,Bd30-1,Bd3-1,BdTR12c,Koz-3	Bd21-3
Bd2	16125276	16125352	Bd2TE2709605	Bd1-1	Bd21,Bd21-3,Bd30-1,Bd3-1,BdTR12c,Koz-3
Bd2	16168237	16169459	Bd2TE2713461	Bd21,Bd21-3,Bd30-1,Bd3-1,BdTR12c,Koz-3	Bd1-1
Bd2	16264250	16265526	Bd2TE2713342	Bd21,Bd1-1,Bd21-3,Bd3-1,Koz-3	BdTR12c,Bd30-1
Bd2	16352930	16353115	Bd2TE2720785	Bd21,Bd21-3,Bd30-1,Bd3-1,Koz-3	BdTR12c,Bd1-1
Bd2	16352989	16353105	Bd2TE2701028	Bd21,Bd21-3,Bd3-1,Koz-3	BdTR12c,Bd1-1,Bd30-1
Bd2	16355364	16355449	Bd2TE2706537	Bd21,Bd21-3,Bd3-1,Koz-3	BdTR12c,Bd1-1,Bd30-1
Bd2	16446572	16446622	Bd4TE2686141	BdTR12c	Bd21,Bd1-1,Bd21-3,Bd30-1,Bd3-1,Koz-3
Bd2	16586083	16590445	Bd2TE2721408	Bd21,Bd30-1,Bd3-1,BdTR12c,Koz-3	Bd21-3,Bd1-1
Bd2	16586119	16586199	Bd2TE2707172	Bd21,Bd30-1,Bd3-1,BdTR12c,Koz-3	Bd21-3,Bd1-1
Bd2	16641004	16641127	Bd2TE2722912	Bd21,Bd1-1,Bd21-3,Bd3-1,BdTR12c,Koz-3	Bd30-1
Bd2	16840796	16840890	Bd2TE2705361	Bd21,Bd1-1,Bd21-3,Bd3-1,BdTR12c,Koz-3	Bd30-1
Bd2	16962273	16962993	Bd2TE2715607	Bd21,Bd21-3,Bd3-1,BdTR12c	Koz-3,Bd1-1,Bd30-1
Bd2	17080734	17080835	Bd1TE2779659,Bd1TE2748243	Bd1-1	Bd21,Bd21-3,Bd30-1,Bd3-1,BdTR12c,Koz-3
Bd2	17155791	17157524	Bd2TE2712205	Bd21,Bd21-3,Bd30-1,Bd3-1,BdTR12c,Koz-3	Bd1-1
Bd2	17311596	17320483	Bd2TE2693987	Bd21,Bd21-3,Bd30-1,Bd3-1,BdTR12c,Koz-3	Bd1-1
Bd2	17316024	17316144	Bd2TE2700634	Bd21,Bd21-3,Bd30-1,Bd3-1,BdTR12c,Koz-3	Bd1-1
Bd2	17331780	17331895	Bd2TE2702170	Bd21,Bd30-1,Bd3-1,BdTR12c,Koz-3	Bd21-3,Bd1-1
Bd2	17384543	17388921	Bd2TE2694413	Bd21,Bd1-1,Bd30-1,Bd3-1,BdTR12c,Koz-3	Bd21-3
Bd2	17446812	17447087	Bd2TE2719078	Bd21,Bd1-1,Bd21-3,Bd3-1,BdTR12c,Koz-3	Bd30-1
Bd2	17447124	17453404	Bd2TE2708975	Bd21,Bd1-1,Bd21-3,Bd3-1,BdTR12c,Koz-3	Bd30-1
Bd2	17495784	17496852	Bd2TE2713864	Bd21,Bd1-1,Bd21-3,Bd3-1,BdTR12c,Koz-3	Bd30-1
Bd2	17523649	17523765	Bd2TE2701809	Bd21,Bd1-1,Bd21-3,Bd30-1,Bd3-1,BdTR12c	Koz-3
Bd2	17694909	17699639	Bd2TE2709455	Bd21,Bd30-1,Bd3-1,BdTR12c,Koz-3	Bd21-3,Bd1-1
Bd2	17834899	17836610	Bd2TE2712280	Bd21,Bd1-1,Bd30-1,Koz-3	Bd3-1,Bd21-3,BdTR12c
Bd2	17988877	17989099	Bd2TE2697974	Bd21,Bd21-3,Bd30-1,Bd3-1,BdTR12c,Koz-3	Bd1-1
Bd2	18148811	18151234	Bd2TE2694894	Bd21,Bd1-1,Bd3-1	Koz-3,Bd21-3,BdTR12c,Bd30-1
Bd2	18317931	18318003	Bd2TE2707755	Bd21,Bd30-1,Bd3-1,BdTR12c,Koz-3	Bd21-3,Bd1-1
Bd2	18318209	18318272	Bd2TE2708193	Bd21,Bd30-1,Bd3-1,BdTR12c,Koz-3	Bd21-3,Bd1-1
Bd2	18318684	18318758	Bd2TE2707601	Bd21,Bd30-1,Bd3-1,BdTR12c,Koz-3	Bd21-3,Bd1-1
Bd2	18326820	18326885	Bd2TE2724672	Bd21,Bd30-1,Bd3-1,BdTR12c,Koz-3	Bd21-3,Bd1-1
Bd2	18326910	18326979	Bd2TE2707884	Bd21,Bd30-1,Bd3-1,BdTR12c,Koz-3	Bd21-3,Bd1-1
Bd2	18642808	18644487	Bd2TE2712349	Bd21,Bd21-3,Bd30-1,Bd3-1,BdTR12c,Koz-3	Bd1-1
Bd2	18921852	18931032	Bd2TE2708630	Bd21,Bd1-1,Bd21-3,Bd30-1,Bd3-1,Koz-3	BdTR12c
Bd2	18931105	18932808	Bd2TE2712304	Bd21,Bd1-1,Bd21-3,Bd30-1,Bd3-1,Koz-3	BdTR12c
Bd2	19058557	19059887	Bd2TE2713084	Bd21,Bd21-3,Bd30-1,Bd3-1,BdTR12c,Koz-3	Bd1-1
Bd2	19131956	19133119	Bd2TE2713656	Bd21,Bd1-1,Bd30-1,Bd3-1,BdTR12c,Koz-3	Bd21-3
Bd2	19387423	19387594	Bd2TE2721248	Bd21,Bd21-3,Bd30-1,Bd3-1,BdTR12c,Koz-3	Bd1-1
Bd2	19399801	19399893	Bd2TE2712478	Bd1-1	Bd21,Bd21-3,Bd30-1,Bd3-1,BdTR12c,Koz-3
Bd2	19521632	19522120	Bd2TE2696515	Bd21,Bd21-3,Bd30-1,Bd3-1,BdTR12c,Koz-3	Bd1-1
Bd2	19522121	19522440	Bd2TE2718570	Bd21,Bd21-3,Bd30-1,Bd3-1,BdTR12c,Koz-3	Bd1-1
Bd2	19799748	19803221	Bd2TE2694594	Bd21,Bd21-3,Bd30-1,Bd3-1,BdTR12c,Koz-3	Bd1-1
Bd2	19812438	19815545	Bd2TE2694703	Bd21,Bd1-1,Bd30-1,Bd3-1,BdTR12c,Koz-3	Bd21-3
Bd2	19830561	19830633	Bd2TE2707718	Bd21,Bd1-1,Bd30-1,Bd3-1,BdTR12c,Koz-3	Bd21-3
Bd2	19831151	19835252	Bd2TE2694448	Bd21,Bd30-1,Bd3-1,BdTR12c,Koz-3	Bd21-3,Bd1-1
Bd2	20036444	20036541	Bd2TE2723633	Bd21,Bd1-1,Bd30-1,Bd3-1,BdTR12c,Koz-3	Bd21-3
Bd2	20060106	20060191	Bd3TE2706398	Bd1-1	Bd21,Bd21-3,Bd30-1,Bd3-1,BdTR12c,Koz-3
Bd2	20161236	20162774	Bd2TE2712552	Bd21,Bd21-3,Bd30-1,Bd3-1,BdTR12c,Koz-3	Bd1-1
Bd2	20226345	20229803	Bd2TE2694602	Bd21,Bd21-3,Bd30-1,Bd3-1,BdTR12c,Koz-3	Bd1-1
Bd2	20245693	20246488	Bd2TE2696000	Bd21,Bd21-3,Bd30-1,Bd3-1,BdTR12c,Koz-3	Bd1-1
Bd2	20409491	20409767	Bd2TE2719068	Bd21,Bd21-3,Bd30-1,Bd3-1,BdTR12c,Koz-3	Bd1-1
Bd2	20413485	20414494	Bd2TE2714106	Bd21,Bd21-3,Bd30-1,Bd3-1,BdTR12c,Koz-3	Bd1-1
Bd2	20416183	20419376	Bd2TE2710476	Bd21,Bd21-3,Bd30-1,Bd3-1,BdTR12c,Koz-3	Bd1-1
Bd2	20453167	20454209	Bd2TE2713953	Bd21,Bd21-3,Bd30-1,Bd3-1,BdTR12c,Koz-3	Bd1-1
Bd2	20650350	20650413	Bd2TE2724763	Bd21,Bd1-1,Bd21-3,Bd30-1,Bd3-1,BdTR12c	Koz-3
Bd2	20805608	20807885	Bd2TE2711390	Bd21,Bd21-3,Bd30-1,Bd3-1,BdTR12c,Koz-3	Bd1-1
Bd2	20969321	20969561	Bd2TE2697672	Bd21,Bd21-3,Bd30-1,Bd3-1,BdTR12c,Koz-3	Bd1-1
Bd2	21184438	21184564	Bd2TE2716910	Bd21,Bd30-1,Bd3-1,BdTR12c,Koz-3	Bd21-3,Bd1-1
Bd2	21184565	21188960	Bd2TE2694409	Bd21,Bd1-1,Bd30-1,Bd3-1,BdTR12c,Koz-3	Bd21-3
Bd2	21479844	21482503	Bd2TE2710933	Bd21,Bd21-3,Bd30-1,Bd3-1,BdTR12c,Koz-3	Bd1-1
Bd2	21573916	21574666	Bd2TE2715504	Bd21,Bd21-3,Bd30-1,Bd3-1,BdTR12c,Koz-3	Bd1-1
Bd2	21574667	21576523	Bd2TE2711983	Bd21,Bd21-3,Bd30-1,Bd3-1,BdTR12c,Koz-3	Bd1-1
Bd2	21577394	21577489	Bd2TE2705272	Bd21,Bd21-3,Bd30-1,Bd3-1,BdTR12c,Koz-3	Bd1-1
Bd2	21642247	21646094	Bd2TE2694484	Bd21,Bd1-1,Bd30-1,Bd3-1,BdTR12c,Koz-3	Bd21-3
Bd2	21646095	21646174	Bd2TE2707264	Bd21,Bd1-1,Bd30-1,Bd3-1,BdTR12c,Koz-3	Bd21-3
Bd2	21839841	21840797	Bd2TE2714416	Bd21,Bd21-3,Bd30-1,Bd3-1,BdTR12c,Koz-3	Bd1-1
Bd2	21840798	21841055	Bd2TE2719348	Bd21,Bd21-3,Bd30-1,Bd3-1,BdTR12c,Koz-3	Bd1-1
Bd2	21841090	21841182	Bd2TE2705773	Bd21,Bd21-3,Bd30-1,Bd3-1,BdTR12c,Koz-3	Bd1-1
Bd2	21841770	21842801	Bd2TE2714007	Bd21,Bd21-3,Bd30-1,Bd3-1,BdTR12c,Koz-3	Bd1-1
Bd2	21842802	21843595	Bd2TE2715279	Bd21,Bd21-3,Bd30-1,Bd3-1,BdTR12c,Koz-3	Bd1-1
Bd2	21940313	21940923	Bd2TE2716214	Bd21,Bd30-1,Bd3-1,BdTR12c,Koz-3	Bd21-3,Bd1-1
Bd2	21940924	21941932	Bd2TE2714116	Bd21,Bd30-1,Bd3-1,BdTR12c,Koz-3	Bd21-3,Bd1-1
Bd2	21948051	21948307	Bd2TE2719364	Bd21,Bd21-3,Bd30-1,Bd3-1,BdTR12c,Koz-3	Bd1-1
Bd2	21948308	21948493	Bd2TE2720797	Bd21,Bd21-3,Bd30-1,Bd3-1,BdTR12c,Koz-3	Bd1-1
Bd2	21948494	21948830	Bd2TE2718372	Bd21,Bd21-3,Bd30-1,Bd3-1,BdTR12c,Koz-3	Bd1-1
Bd2	22032429	22032491	Bd2TE2716524,Bd2TE2710127	Bd1-1	Bd21,Bd21-3,Bd30-1,Bd3-1,BdTR12c,Koz-3
Bd2	22038689	22039603	Bd2TE2714597	Bd21,Bd21-3,Bd30-1,Bd3-1,BdTR12c,Koz-3	Bd1-1
Bd2	22141108	22144201	Bd2TE2710580	Bd21,Bd21-3,Bd30-1,Bd3-1,BdTR12c,Koz-3	Bd1-1
Bd2	22144202	22144795	Bd2TE2716295	Bd21,Bd21-3,Bd30-1,Bd3-1,BdTR12c,Koz-3	Bd1-1
Bd2	22359799	22361153	Bd2TE2712946	Bd21,Bd21-3,Bd30-1,Bd3-1,BdTR12c,Koz-3	Bd1-1
Bd2	22386816	22387321	Bd2TE2716903	Bd21,Bd1-1,Bd21-3,Bd30-1,Bd3-1,BdTR12c	Koz-3
Bd2	22393768	22394404	Bd2TE2716039	Bd21,Bd21-3,Bd3-1,Koz-3	BdTR12c,Bd1-1,Bd30-1
Bd2	22394405	22397323	Bd2TE2710696	Bd21,Bd21-3,Bd3-1,Koz-3	BdTR12c,Bd1-1,Bd30-1
Bd2	22445498	22446198	Bd2TE2715703	Bd21,Bd30-1,Bd3-1,BdTR12c,Koz-3	Bd21-3,Bd1-1
Bd2	22446199	22447918	Bd2TE2712245	Bd21,Bd1-1,Bd30-1,Bd3-1,BdTR12c,Koz-3	Bd21-3
Bd2	22447919	22447985	Bd2TE2724620	Bd21,Bd1-1,Bd30-1,Bd3-1,BdTR12c,Koz-3	Bd21-3
Bd2	22592305	22596130	Bd2TE2694489	Bd21,Bd30-1,Bd3-1,BdTR12c,Koz-3	Bd21-3,Bd1-1
Bd2	22722503	22722605	Bd2TE2704254	Bd21,Bd30-1,Bd3-1,BdTR12c,Koz-3	Bd21-3,Bd1-1
Bd2	22723808	22724131	Bd2TE2696992	Bd21,Bd30-1,Bd3-1,BdTR12c,Koz-3	Bd21-3,Bd1-1
Bd2	22773875	22777345	Bd2TE2694596	Bd21,Bd30-1,Bd3-1,BdTR12c,Koz-3	Bd21-3,Bd1-1
Bd2	22814282	22819539	Bd2TE2709254	Bd21,Bd21-3,Bd30-1,Bd3-1,BdTR12c,Koz-3	Bd1-1
Bd2	22955262	22956281	Bd2TE2714062	Bd21,Bd21-3,Bd30-1,Bd3-1,BdTR12c,Koz-3	Bd1-1
Bd2	23051940	23052041	Bd2TE2704276	Bd21,Bd1-1,Bd30-1,Bd3-1,BdTR12c,Koz-3	Bd21-3
Bd2	23052391	23056588	Bd2TE2709691	Bd21,Bd30-1,Bd3-1,BdTR12c,Koz-3	Bd21-3,Bd1-1
Bd2	23120956	23122946	Bd2TE2711798	Bd21,Bd21-3,Bd30-1,Bd3-1,BdTR12c,Koz-3	Bd1-1
Bd2	23175842	23175904	Bd2TE2724790	Bd21,Bd1-1,Bd30-1,Bd3-1,BdTR12c,Koz-3	Bd21-3
Bd2	23176129	23180171	Bd2TE2709789	Bd21,Bd1-1,Bd30-1,Bd3-1,BdTR12c,Koz-3	Bd21-3
Bd2	23203910	23204005	Bd2TE2722735	Bd21,Bd30-1,Bd3-1,BdTR12c,Koz-3	Bd21-3,Bd1-1
Bd2	23331381	23333974	Bd2TE2710997	Bd21,Bd21-3,Bd30-1,Bd3-1,BdTR12c,Koz-3	Bd1-1
Bd2	23335633	23339953	Bd2TE2709625	Bd21,Bd1-1,Bd30-1,Bd3-1,BdTR12c,Koz-3	Bd21-3
Bd2	23387898	23392002	Bd2TE2694446	Bd21,Bd30-1,Bd3-1,BdTR12c,Koz-3	Bd21-3,Bd1-1
Bd2	23399011	23399630	Bd2TE2716137	Bd21,Bd1-1,Bd30-1,Bd3-1,BdTR12c,Koz-3	Bd21-3
Bd2	23399642	23403661	Bd2TE2709805	Bd21,Bd1-1,Bd30-1,Bd3-1,BdTR12c,Koz-3	Bd21-3
Bd2	23623334	23623405	Bd2TE2707761	Bd21,Bd30-1,Bd3-1,BdTR12c,Koz-3	Bd21-3,Bd1-1
Bd2	23727648	23727730	Bd2TE2706952	Bd21,Bd21-3,Bd30-1,Bd3-1,BdTR12c,Koz-3	Bd1-1
Bd2	23764305	23772459	Bd2TE2694038	Bd21,Bd21-3,Bd30-1,Bd3-1,BdTR12c,Koz-3	Bd1-1
Bd2	23780332	23781653	Bd2TE2712893	Bd21,Bd21-3,Bd30-1,Bd3-1,BdTR12c,Koz-3	Bd1-1
Bd2	23783712	23783828	Bd2TE2701226	Bd21,Bd21-3,Bd30-1,Bd3-1,BdTR12c,Koz-3	Bd1-1
Bd2	23967669	23972257	Bd2TE2694377	Bd21,Bd1-1,Bd30-1,Bd3-1,BdTR12c,Koz-3	Bd21-3
Bd2	24093164	24093221	Bd3TE2692857	BdTR12c	Bd21,Bd1-1,Bd21-3,Bd30-1,Bd3-1,Koz-3
Bd2	24144094	24148925	Bd2TE2709413	Bd21,Bd1-1,Bd21-3,Bd30-1,Bd3-1,Koz-3	BdTR12c
Bd2	24295004	24295270	Bd2TE2697284	Bd21,Bd21-3,Bd30-1,Bd3-1,BdTR12c,Koz-3	Bd1-1
Bd2	24297220	24298364	Bd2TE2713684	Bd21,Bd21-3,Bd30-1,Bd3-1,BdTR12c,Koz-3	Bd1-1
Bd2	24298365	24298415	Bd2TE2725162	Bd21,Bd21-3,Bd30-1,Bd3-1,BdTR12c,Koz-3	Bd1-1
Bd2	24409511	24412926	Bd2TE2710158	Bd21,Bd30-1,Bd3-1	Koz-3,Bd21-3,Bd1-1,BdTR12c
Bd2	24696226	24696444	Bd2TE2698036	Bd21,Bd21-3,Bd30-1,Bd3-1,Koz-3	BdTR12c,Bd1-1
Bd2	24859130	24859538	Bd2TE2717767	Bd21,Bd30-1,Bd3-1,BdTR12c,Koz-3	Bd21-3,Bd1-1
Bd2	24859903	24863132	Bd2TE2710436	Bd21,Bd21-3,Bd30-1,Bd3-1,BdTR12c,Koz-3	Bd1-1
Bd2	24882446	24884185	Bd2TE2695213	Bd21,Bd1-1,Bd30-1,Bd3-1,BdTR12c,Koz-3	Bd21-3
Bd2	24993224	24993620	Bd2TE2717855	Bd21,Bd21-3,Bd30-1,Bd3-1,BdTR12c,Koz-3	Bd1-1
Bd2	24995598	24996593	Bd2TE2714221	Bd21,Bd21-3,Bd30-1,Bd3-1,BdTR12c,Koz-3	Bd1-1
Bd2	25061650	25061975	Bd2TE2718514	Bd21,Bd21-3,Bd30-1,Bd3-1,BdTR12c,Koz-3	Bd1-1
Bd2	25078672	25079180	Bd2TE2716883	Bd21,Bd1-1,Bd21-3,Bd30-1,Bd3-1,Koz-3	BdTR12c
Bd2	25079181	25079267	Bd2TE2723942	Bd21,Bd1-1,Bd21-3,Bd30-1,Bd3-1,Koz-3	BdTR12c
Bd2	25146213	25161104	Bd2TE2693801	Bd21,Bd21-3,Bd30-1,Bd3-1,BdTR12c,Koz-3	Bd1-1
Bd2	25234069	25235978	Bd2TE2695113	Bd21,Bd1-1,Bd30-1,Bd3-1,Koz-3	Bd21-3,BdTR12c
Bd2	25353330	25356789	Bd2TE2694600	Bd21,Bd30-1,Bd3-1,BdTR12c,Koz-3	Bd21-3,Bd1-1
Bd2	25802454	25802512	Bd5TE2641422	Bd1-1	Bd21,Bd21-3,Bd30-1,Bd3-1,BdTR12c,Koz-3
Bd2	25915277	25916603	Bd2TE2713146	Bd21,Bd21-3,Bd3-1	Koz-3,BdTR12c,Bd1-1,Bd30-1
Bd2	25933522	25933614	Bd2TE2723749	Bd21,Bd21-3,Bd30-1,Bd3-1,BdTR12c,Koz-3	Bd1-1
Bd2	25943538	25943852	Bd2TE2718621	Bd21,Bd21-3,Bd30-1,Bd3-1,BdTR12c,Koz-3	Bd1-1
Bd2	25969681	25973298	Bd2TE2694543	Bd21,Bd30-1,Bd3-1,BdTR12c,Koz-3	Bd21-3,Bd1-1
Bd2	26214814	26218782	Bd2TE2709840	Bd21,Bd21-3,Bd30-1,Bd3-1,BdTR12c,Koz-3	Bd1-1
Bd2	26583592	26587673	Bd2TE2694450	Bd21,Bd1-1,Bd30-1,Bd3-1,BdTR12c,Koz-3	Bd21-3
Bd2	26597956	26601067	Bd2TE2710565	Bd21,Bd1-1,Bd21-3,Bd3-1	Koz-3,BdTR12c,Bd30-1
Bd2	26618557	26620274	Bd2TE2712247	Bd21,Bd21-3,Bd30-1,Bd3-1,BdTR12c,Koz-3	Bd1-1
Bd2	26690453	26690540	Bd2TE2695393	Bd1-1	Bd21,Bd21-3,Bd30-1,Bd3-1,BdTR12c,Koz-3
Bd2	26706248	26706355	Bd4TE2681044,Bd4TE2672035	BdTR12c	Bd21,Bd1-1,Bd21-3,Bd30-1,Bd3-1,Koz-3
Bd2	26750744	26751331	Bd2TE2716332	Bd21,Bd21-3,Bd30-1,Bd3-1,Koz-3	BdTR12c,Bd1-1
Bd2	26753944	26754537	Bd2TE2716297	Bd21,Bd21-3,Bd30-1,Bd3-1,Koz-3	BdTR12c,Bd1-1
Bd2	26770343	26771860	Bd2TE2712593	Bd21,Bd21-3,Bd30-1,Bd3-1,BdTR12c,Koz-3	Bd1-1
Bd2	26785718	26790286	Bd2TE2694381	Bd21,Bd1-1,Bd30-1,Bd3-1,BdTR12c,Koz-3	Bd21-3
Bd2	26829717	26829826	Bd2TE2723279	Bd21,Bd21-3,Bd30-1,Bd3-1,BdTR12c,Koz-3	Bd1-1
Bd2	26839474	26842089	Bd2TE2710975	Bd21,Bd21-3,Bd30-1,Bd3-1,BdTR12c,Koz-3	Bd1-1
Bd2	26842090	26843645	Bd2TE2712520	Bd21,Bd21-3,Bd30-1,Bd3-1,BdTR12c,Koz-3	Bd1-1
Bd2	26852761	26852824	Bd2TE2724742	Bd21,Bd21-3,Bd30-1,Bd3-1,BdTR12c,Koz-3	Bd1-1
Bd2	26853977	26855895	Bd2TE2711901	Bd21,Bd30-1,Bd3-1,BdTR12c,Koz-3	Bd21-3,Bd1-1
Bd2	26876247	26876424	Bd2TE2721033	Bd21,Bd21-3,Bd30-1,Bd3-1,BdTR12c,Koz-3	Bd1-1
Bd2	26876425	26877747	Bd2TE2713194	Bd21,Bd21-3,Bd30-1,Bd3-1,BdTR12c,Koz-3	Bd1-1
Bd2	26906144	26909426	Bd2TE2713436	Bd21,Bd1-1,Bd21-3,Bd30-1,Bd3-1	Koz-3,BdTR12c
Bd2	26907345	26909314	Bd2TE2695061	Bd21,Bd21-3,Bd30-1,Bd3-1	Koz-3,BdTR12c,Bd1-1
Bd2	26910102	26913772	Bd2TE2694525	Bd21,Bd30-1,Bd3-1,BdTR12c,Koz-3	Bd21-3,Bd1-1
Bd2	26975499	26975708	Bd2TE2698211	Bd21,Bd21-3,Bd30-1,Bd3-1,BdTR12c,Koz-3	Bd1-1
Bd2	27218082	27219030	Bd2TE2714460	Bd21,Bd1-1,Koz-3	Bd3-1,Bd21-3,BdTR12c,Bd30-1
Bd2	27263078	27263247	Bd2TE2721361	Bd21,Bd1-1,Bd30-1,Bd3-1,BdTR12c,Koz-3	Bd21-3
Bd2	27271805	27275749	Bd2TE2694470	Bd21,Bd30-1,Bd3-1,BdTR12c,Koz-3	Bd21-3,Bd1-1
Bd2	27379719	27379955	Bd2TE2697796	Bd21,Bd21-3,Bd30-1,Bd3-1,BdTR12c,Koz-3	Bd1-1
Bd2	27413600	27413697	Bd2TE2723613	Bd21,Bd1-1,Bd21-3,Bd3-1,Koz-3	BdTR12c,Bd30-1
Bd2	27413698	27421798	Bd2TE2694045	Bd21,Bd1-1,Bd21-3,Bd3-1,Koz-3	BdTR12c,Bd30-1
Bd2	27456338	27464204	Bd2TE2694066	Bd21,Bd21-3,Bd30-1,Bd3-1,Koz-3	BdTR12c,Bd1-1
Bd2	27477890	27482609	Bd2TE2694354	Bd21,Bd1-1,Bd30-1,Bd3-1,BdTR12c,Koz-3	Bd21-3
Bd2	27503678	27505019	Bd2TE2713038	Bd21,Bd1-1,Bd21-3,Bd3-1,BdTR12c,Koz-3	Bd30-1
Bd2	27515578	27515653	Bd2TE2724318	Bd21,Bd21-3,Bd30-1,Bd3-1,BdTR12c,Koz-3	Bd1-1
Bd2	27541551	27541631	Bd4TE2672021,Bd4TE2680018	Bd30-1	Bd21,Bd1-1,Bd21-3,Bd3-1,BdTR12c,Koz-3
Bd2	27630214	27634843	Bd2TE2709550	Bd21,Bd1-1,Bd30-1,Bd3-1,BdTR12c,Koz-3	Bd21-3
Bd2	27933506	27935135	Bd2TE2695287	Bd21,Bd1-1,Bd30-1,Bd3-1,BdTR12c,Koz-3	Bd21-3
Bd2	27973622	27974164	Bd2TE2716563	Bd21,Bd21-3,Bd30-1,Bd3-1,BdTR12c,Koz-3	Bd1-1
Bd2	27983203	27985533	Bd2TE2711310	Bd21,Bd21-3,Bd30-1,Bd3-1,BdTR12c,Koz-3	Bd1-1
Bd2	28016834	28018322	Bd2TE2712645	Bd21,Bd21-3,Bd30-1,Bd3-1,BdTR12c,Koz-3	Bd1-1
Bd2	28031130	28031611	Bd2TE2717086	Bd21,Bd21-3,Bd30-1,Bd3-1,BdTR12c,Koz-3	Bd1-1
Bd2	28091628	28094773	Bd2TE2710538	Bd21,Bd30-1,Bd3-1,BdTR12c,Koz-3	Bd21-3,Bd1-1
Bd2	28168624	28168677	Bd2TE2725088	Bd21,Bd21-3,Bd30-1,Bd3-1,BdTR12c,Koz-3	Bd1-1
Bd2	28175878	28176211	Bd2TE2718412	Bd21,Bd21-3,Bd30-1,Bd3-1,BdTR12c,Koz-3	Bd1-1
Bd2	28185175	28186265	Bd2TE2713811	Bd21,Bd21-3,Bd30-1,Bd3-1,BdTR12c,Koz-3	Bd1-1
Bd2	28256312	28257350	Bd2TE2713984	Bd21,Bd1-1,Bd21-3,Bd3-1,Koz-3	BdTR12c,Bd30-1
Bd2	28286262	28286393	Bd2TE2722707	Bd21,Bd21-3,Bd30-1,Bd3-1,BdTR12c,Koz-3	Bd1-1
Bd2	28357568	28357653	Bd2TE2706713	Bd21,Bd21-3,Bd30-1,Bd3-1,BdTR12c,Koz-3	Bd1-1
Bd2	28369651	28369722	Bd3TE2690998,Bd3TE2690263	Bd1-1	Bd21,Bd21-3,Bd30-1,Bd3-1,BdTR12c,Koz-3
Bd2	28389501	28391843	Bd2TE2711291	Bd21,Bd21-3,Bd30-1,Bd3-1,BdTR12c,Koz-3	Bd1-1
Bd2	28404522	28405063	Bd2TE2716571	Bd21,Bd1-1,Bd21-3,Bd30-1,Bd3-1,BdTR12c	Koz-3
Bd2	28435321	28436361	Bd2TE2713972	Bd21,Bd1-1,Bd21-3,Bd30-1,Bd3-1,Koz-3	BdTR12c
Bd2	28449521	28450563	Bd2TE2713955	Bd21,Bd1-1,Bd21-3,Bd3-1,BdTR12c,Koz-3	Bd30-1
Bd2	28478537	28478592	Bd5TE2641750	BdTR12c	Bd21,Bd1-1,Bd21-3,Bd30-1,Bd3-1,Koz-3
Bd2	28479395	28480390	Bd2TE2714212	Bd21,Bd21-3,Bd30-1,Bd3-1,BdTR12c,Koz-3	Bd1-1
Bd2	28508581	28511807	Bd2TE2710442	Bd21,Bd30-1,Bd3-1,BdTR12c,Koz-3	Bd21-3,Bd1-1
Bd2	28520814	28521102	Bd2TE2718905	Bd21,Bd1-1,Bd21-3,Bd3-1,Koz-3	BdTR12c,Bd30-1
Bd2	28572290	28572750	Bd2TE2717276	Bd21,Bd1-1,Bd21-3,Bd30-1,Bd3-1,Koz-3	BdTR12c
Bd2	28572751	28573505	Bd2TE2715481	Bd21,Bd1-1,Bd21-3,Bd30-1,Bd3-1,Koz-3	BdTR12c
Bd2	28577865	28578521	Bd2TE2715948	Bd21,Bd21-3,Bd30-1,Bd3-1,Koz-3	BdTR12c,Bd1-1
Bd2	28578522	28581170	Bd2TE2710951	Bd21,Bd21-3,Bd30-1,Bd3-1,Koz-3	BdTR12c,Bd1-1
Bd2	28620173	28620613	Bd2TE2717473	Bd21,Bd1-1,Bd21-3,Bd30-1,Bd3-1	Koz-3,BdTR12c
Bd2	28620614	28621016	Bd2TE2717807	Bd21,Bd21-3,Bd3-1	Koz-3,BdTR12c,Bd1-1,Bd30-1
Bd2	28662661	28663256	Bd2TE2716285	Bd21,Bd21-3,Bd30-1,Bd3-1,BdTR12c,Koz-3	Bd1-1
Bd2	28665517	28666558	Bd2TE2713957	Bd21,Bd1-1,Bd21-3,Bd30-1,Bd3-1,Koz-3	BdTR12c
Bd2	28680317	28681536	Bd2TE2713475	Bd21,Bd21-3,Bd30-1,Bd3-1,BdTR12c,Koz-3	Bd1-1
Bd2	28688562	28691027	Bd2TE2711163	Bd21,Bd21-3,Bd30-1,Bd3-1,BdTR12c,Koz-3	Bd1-1
Bd2	28719800	28720138	Bd2TE2718355	Bd21,Bd1-1,Bd30-1,Bd3-1,BdTR12c,Koz-3	Bd21-3
Bd2	28762671	28763344	Bd2TE2715867	Bd21,Bd21-3,Bd3-1,BdTR12c,Koz-3	Bd1-1,Bd30-1
Bd2	29005794	29005839	Bd1TE2766723	Bd1-1	Bd21,Bd21-3,Bd30-1,Bd3-1,BdTR12c,Koz-3
Bd2	29010581	29011532	Bd2TE2714441	Bd21,Bd30-1,Bd3-1	Koz-3,Bd21-3,Bd1-1,BdTR12c
Bd2	29037093	29037241	Bd2TE2722248	Bd21,Bd21-3,Bd30-1,Bd3-1,BdTR12c,Koz-3	Bd1-1
Bd2	29046092	29046378	Bd2TE2718933	Bd21,Bd1-1,Bd21-3,Bd30-1,Bd3-1,Koz-3	BdTR12c
Bd2	29073303	29077571	Bd2TE2709657	Bd21,Bd21-3,Bd30-1,Bd3-1,BdTR12c,Koz-3	Bd1-1
Bd2	29100454	29100758	Bd2TE2718720	Bd21,Bd1-1,Bd21-3,Bd30-1,Bd3-1	Koz-3,BdTR12c
Bd2	29175805	29178166	Bd2TE2711264	Bd21,Bd21-3,Bd30-1,Bd3-1,Koz-3	BdTR12c,Bd1-1
Bd2	29178167	29180295	Bd2TE2711596	Bd21,Bd21-3,Bd30-1,Bd3-1,BdTR12c,Koz-3	Bd1-1
Bd2	29180296	29181314	Bd2TE2714068	Bd21,Bd21-3,Bd30-1,Bd3-1,BdTR12c,Koz-3	Bd1-1
Bd2	29267414	29267483	Bd2TE2724493	Bd21,Bd3-1	Koz-3,Bd21-3,Bd1-1,BdTR12c,Bd30-1
Bd2	29311000	29312291	Bd2TE2713292	Bd21,Bd1-1,Bd21-3,Bd30-1,Bd3-1	Koz-3,BdTR12c
Bd2	29397116	29398154	Bd2TE2713978	Bd21,Bd21-3,Bd30-1,Bd3-1,BdTR12c,Koz-3	Bd1-1
Bd2	29434703	29434890	Bd2TE2720742	Bd21,Bd1-1,Bd30-1,Bd3-1,BdTR12c,Koz-3	Bd21-3
Bd2	29434993	29435089	Bd2TE2723661	Bd21,Bd1-1,Bd30-1,Bd3-1,BdTR12c,Koz-3	Bd21-3
Bd2	29436396	29436475	Bd2TE2724159	Bd21,Bd30-1,Bd3-1,BdTR12c,Koz-3	Bd21-3,Bd1-1
Bd2	29436476	29437671	Bd2TE2713555	Bd21,Bd30-1,Bd3-1,BdTR12c,Koz-3	Bd21-3,Bd1-1
Bd2	29516869	29518729	Bd2TE2711973	Bd21,Bd21-3,Bd30-1,Bd3-1,BdTR12c,Koz-3	Bd1-1
Bd2	29518748	29519363	Bd2TE2716170	Bd21,Bd21-3,Bd30-1,Bd3-1,BdTR12c,Koz-3	Bd1-1
Bd2	29556190	29556455	Bd2TE2719225	Bd21,Bd21-3,Bd30-1,Bd3-1,BdTR12c,Koz-3	Bd1-1
Bd2	29594400	29597682	Bd2TE2710369	Bd21,Bd21-3,Bd30-1,Bd3-1,BdTR12c,Koz-3	Bd1-1
Bd2	29636959	29637576	Bd2TE2716154	Bd21,Bd1-1,Bd21-3,Bd30-1,Bd3-1,Koz-3	BdTR12c
Bd2	29655795	29656078	Bd2TE2718980	Bd21,Bd1-1,Bd21-3,Bd30-1,Bd3-1,BdTR12c	Koz-3
Bd2	29686628	29690489	Bd2TE2710732	Bd21,Bd1-1,Bd21-3,Bd30-1,Bd3-1,BdTR12c	Koz-3
Bd2	29686826	29687851	Bd2TE2714043	Bd21,Bd1-1,Bd21-3,Bd30-1,Bd3-1,BdTR12c	Koz-3
Bd2	29690490	29690879	Bd2TE2717905	Bd21,Bd1-1,Bd21-3,Bd30-1,Bd3-1,BdTR12c	Koz-3
Bd2	29691773	29692281	Bd2TE2716881	Bd21,Bd1-1,Bd21-3,Bd30-1,Bd3-1,BdTR12c	Koz-3
Bd2	29731435	29732281	Bd2TE2714989	Bd21,Bd21-3,Bd30-1,Bd3-1,BdTR12c,Koz-3	Bd1-1
Bd2	29838481	29839168	Bd2TE2715785	Bd21,Bd30-1,Bd3-1,BdTR12c,Koz-3	Bd21-3,Bd1-1
Bd2	29839169	29840638	Bd2TE2712668	Bd21,Bd30-1,Bd3-1,BdTR12c,Koz-3	Bd21-3,Bd1-1
Bd2	29865199	29865595	Bd2TE2717857	Bd21,Bd21-3,Bd30-1,Bd3-1,BdTR12c,Koz-3	Bd1-1
Bd2	29896037	29899898	Bd2TE2709890	Bd21,Bd21-3,Bd30-1,Bd3-1,BdTR12c,Koz-3	Bd1-1
Bd2	29899899	29900063	Bd2TE2721579	Bd21,Bd21-3,Bd30-1,Bd3-1,BdTR12c,Koz-3	Bd1-1
Bd2	29900065	29900687	Bd2TE2716125	Bd21,Bd1-1,Bd21-3,Bd30-1,Bd3-1,Koz-3	BdTR12c
Bd2	29934819	29936149	Bd2TE2713088	Bd21,Bd1-1,Bd21-3,Bd3-1,BdTR12c,Koz-3	Bd30-1
Bd2	30005979	30006338	Bd2TE2718149	Bd21,Bd21-3,Bd30-1,Bd3-1,BdTR12c,Koz-3	Bd1-1
Bd2	30086629	30086723	Bd2TE2710724	BdTR12c	Bd21,Bd1-1,Bd21-3,Bd30-1,Bd3-1,Koz-3
Bd2	30117258	30117622	Bd2TE2718104	Bd21,Bd30-1,Bd3-1,BdTR12c,Koz-3	Bd21-3,Bd1-1
Bd2	30117623	30117686	Bd2TE2724755	Bd21,Bd30-1,Bd3-1,BdTR12c,Koz-3	Bd21-3,Bd1-1
Bd2	30153990	30154076	Bd2TE2706306	Bd21,Bd21-3,Bd30-1,Bd3-1,BdTR12c,Koz-3	Bd1-1
Bd2	30183201	30183250	Bd4TE2683281	Bd3-1	Bd21,Bd1-1,Bd21-3,Bd30-1,BdTR12c,Koz-3
Bd2	30216682	30220726	Bd2TE2694454	Bd21,Bd30-1,Bd3-1,BdTR12c,Koz-3	Bd21-3,Bd1-1
Bd2	30309206	30311227	Bd2TE2711762	Bd21,Bd1-1,Bd21-3,Bd30-1,Bd3-1,Koz-3	BdTR12c
Bd2	30447394	30447527	Bd2TE2722636	Bd21,Bd1-1,Bd30-1,Bd3-1,BdTR12c,Koz-3	Bd21-3
Bd2	30449183	30450452	Bd2TE2695533	Bd21,Bd1-1,Bd30-1,Bd3-1,BdTR12c,Koz-3	Bd21-3
Bd2	30530013	30530930	Bd2TE2695855	Bd21,Bd1-1,Bd30-1,Bd3-1,BdTR12c,Koz-3	Bd21-3
Bd2	30704871	30705567	Bd2TE2715729	Bd21,Bd1-1,Bd30-1,Bd3-1,BdTR12c,Koz-3	Bd21-3
Bd2	30706581	30706836	Bd2TE2719372	Bd21,Bd1-1,Bd30-1,Bd3-1,BdTR12c,Koz-3	Bd21-3
Bd2	30706837	30707657	Bd2TE2715130	Bd21,Bd1-1,Bd30-1,Bd3-1,BdTR12c,Koz-3	Bd21-3
Bd2	30715443	30716070	Bd2TE2716096	Bd21,Bd21-3,Bd30-1,Bd3-1,BdTR12c,Koz-3	Bd1-1
Bd2	30721889	30722212	Bd2TE2718528	Bd21,Bd1-1,Bd21-3,Bd3-1,Koz-3	BdTR12c,Bd30-1
Bd2	30734389	30735033	Bd2TE2716003	Bd21,Bd21-3,Bd30-1,Bd3-1,BdTR12c,Koz-3	Bd1-1
Bd2	30735034	30738327	Bd2TE2710337	Bd21,Bd21-3,Bd30-1,Bd3-1,BdTR12c,Koz-3	Bd1-1
Bd2	30762928	30763509	Bd2TE2716362	Bd21,Bd21-3,Bd30-1,Bd3-1,BdTR12c,Koz-3	Bd1-1
Bd2	30763559	30763673	Bd2TE2722675	Bd21,Bd21-3,Bd30-1,Bd3-1,BdTR12c,Koz-3	Bd1-1
Bd2	30782615	30786161	Bd2TE2694608	Bd21,Bd21-3,Bd30-1,Bd3-1,BdTR12c,Koz-3	Bd1-1
Bd2	30784842	30784958	Bd2TE2702057	Bd21,Bd21-3,Bd30-1,Bd3-1,BdTR12c,Koz-3	Bd1-1
Bd2	30795804	30796115	Bd2TE2718650	Bd21,Bd1-1,Bd30-1,Bd3-1,BdTR12c,Koz-3	Bd21-3
Bd2	30824392	30824499	Bd2TE2723325	Bd21,Bd1-1,Bd21-3,Bd30-1,Bd3-1,Koz-3	BdTR12c
Bd2	30853136	30861063	Bd2TE2694057	Bd21,Bd21-3,Bd3-1,Koz-3	BdTR12c,Bd1-1,Bd30-1
Bd2	30953837	30957194	Bd2TE2694634	Bd21,Bd21-3,Bd30-1,Bd3-1,BdTR12c,Koz-3	Bd1-1
Bd2	31034221	31034275	Bd1TE2767215	BdTR12c	Bd21,Bd1-1,Bd21-3,Bd30-1,Bd3-1,Koz-3
Bd2	31071638	31072992	Bd2TE2712942	Bd21,Bd21-3,Bd30-1,Bd3-1,BdTR12c,Koz-3	Bd1-1
Bd2	31153195	31153247	Bd1TE2766092,Bd1TE2769239	Bd30-1	Bd21,Bd1-1,Bd21-3,Bd3-1,BdTR12c,Koz-3
Bd2	31159958	31161492	Bd2TE2712564	Bd21,Bd21-3,Bd30-1,Bd3-1,BdTR12c,Koz-3	Bd1-1
Bd2	31287603	31287847	Bd2TE2719503	Bd21,Bd21-3,Bd30-1,Bd3-1,BdTR12c,Koz-3	Bd1-1
Bd2	31287848	31291852	Bd2TE2709817	Bd21,Bd21-3,Bd30-1,Bd3-1,BdTR12c,Koz-3	Bd1-1
Bd2	31343989	31344069	Bd2TE2694743	Bd1-1	Bd21,Bd21-3,Bd30-1,Bd3-1,BdTR12c,Koz-3
Bd2	31500118	31502417	Bd2TE2711358	Bd21,Bd1-1,Bd21-3,Bd30-1,Bd3-1,Koz-3	BdTR12c
Bd2	31650044	31650337	Bd2TE2718835	Bd21,Bd21-3,Bd30-1,Bd3-1,BdTR12c,Koz-3	Bd1-1
Bd2	31731202	31731258	Bd2TE2710544	Bd1-1	Bd21,Bd21-3,Bd30-1,Bd3-1,BdTR12c,Koz-3
Bd2	31731537	31731597	Bd2TE2710544	Bd1-1	Bd21,Bd21-3,Bd30-1,Bd3-1,BdTR12c,Koz-3
Bd2	31733853	31741639	Bd2TE2694074	Bd21,Bd21-3,Bd30-1,Bd3-1,BdTR12c,Koz-3	Bd1-1
Bd2	31800312	31803829	Bd2TE2710091	Bd21,Bd21-3,Bd30-1,Bd3-1,BdTR12c,Koz-3	Bd1-1
Bd2	31811381	31812706	Bd2TE2713124	Bd21,Bd21-3,Bd30-1,Bd3-1,BdTR12c,Koz-3	Bd1-1
Bd2	31911839	31911975	Bd2TE2722556	Bd21,Bd21-3,Bd30-1,Bd3-1,BdTR12c,Koz-3	Bd1-1
Bd2	31911976	31912204	Bd2TE2719847	Bd21,Bd21-3,Bd3-1,BdTR12c,Koz-3	Bd1-1,Bd30-1
Bd2	32049746	32049969	Bd2TE2719935	Bd21,Bd21-3,Bd30-1,Bd3-1,BdTR12c,Koz-3	Bd1-1
Bd2	32049998	32050105	Bd2TE2723324	Bd21,Bd21-3,Bd30-1,Bd3-1,BdTR12c,Koz-3	Bd1-1
Bd2	32050127	32055697	Bd2TE2709227	Bd21,Bd21-3,Bd30-1,Bd3-1,BdTR12c,Koz-3	Bd1-1
Bd2	32050306	32050529	Bd2TE2719955	Bd21,Bd21-3,Bd30-1,Bd3-1,BdTR12c,Koz-3	Bd1-1
Bd2	32055730	32055796	Bd2TE2724640	Bd21,Bd21-3,Bd30-1,Bd3-1,BdTR12c,Koz-3	Bd1-1
Bd2	32134056	32134537	Bd2TE2717088	Bd21,Bd1-1,Bd21-3,Bd30-1,Bd3-1,BdTR12c	Koz-3
Bd2	32134586	32134656	Bd2TE2724476	Bd21,Bd1-1,Bd21-3,Bd30-1,Bd3-1,BdTR12c	Koz-3
Bd2	32135265	32135909	Bd2TE2715997	Bd21,Bd1-1,Bd21-3,Bd30-1,Bd3-1,BdTR12c	Koz-3
Bd2	32406627	32409791	Bd2TE2710513	Bd21,Bd1-1,Bd21-3,Bd3-1,BdTR12c,Koz-3	Bd30-1
Bd2	32409792	32410255	Bd2TE2717246	Bd21,Bd1-1,Bd3-1,BdTR12c,Koz-3	Bd21-3,Bd30-1
Bd2	32577623	32577743	Bd2TE2722991	Bd21,Bd1-1,Bd30-1,Bd3-1,BdTR12c,Koz-3	Bd21-3
Bd2	32578008	32581420	Bd2TE2694616	Bd21,Bd30-1,Bd3-1,BdTR12c,Koz-3	Bd21-3,Bd1-1
Bd2	32766064	32766360	Bd2TE2718797	Bd21,Bd21-3,Bd30-1,Bd3-1,BdTR12c,Koz-3	Bd1-1
Bd2	32844307	32845634	Bd2TE2713122	Bd21,Bd21-3,Bd30-1,Bd3-1,BdTR12c,Koz-3	Bd1-1
Bd2	33103662	33107347	Bd2TE2694521	Bd21,Bd30-1,Bd3-1,BdTR12c,Koz-3	Bd21-3,Bd1-1
Bd2	33107692	33107760	Bd2TE2707925	Bd21,Bd1-1,Bd30-1,Bd3-1,BdTR12c,Koz-3	Bd21-3
Bd2	33173781	33173904	Bd2TE2722918	Bd21,Bd1-1,Bd30-1,Bd3-1,BdTR12c,Koz-3	Bd21-3
Bd2	33174546	33178545	Bd2TE2694464	Bd21,Bd1-1,Bd30-1,Bd3-1,BdTR12c,Koz-3	Bd21-3
Bd2	33305386	33305454	Bd2TE2709534	Bd1-1	Bd21,Bd21-3,Bd30-1,Bd3-1,BdTR12c,Koz-3
Bd2	33365961	33367681	Bd2TE2712241	Bd21,Bd21-3,Bd30-1,Bd3-1,BdTR12c,Koz-3	Bd1-1
Bd2	33604269	33605641	Bd2TE2712859	Bd21,Bd1-1,Bd21-3,Bd3-1	Koz-3,BdTR12c,Bd30-1
Bd2	33619668	33619795	Bd2TE2699927	Bd21,Bd1-1,Bd21-3,Bd30-1,BdTR12c,Koz-3	Bd3-1
Bd2	33895272	33895961	Bd2TE2715765	Bd21,Bd21-3,Bd30-1,Bd3-1,BdTR12c,Koz-3	Bd1-1
Bd2	33895962	33896101	Bd2TE2722496	Bd21,Bd21-3,Bd30-1,Bd3-1,Koz-3	BdTR12c,Bd1-1
Bd2	33896103	33898103	Bd2TE2711788	Bd21,Bd21-3,Bd30-1,Bd3-1,BdTR12c,Koz-3	Bd1-1
Bd2	33898105	33898416	Bd2TE2718645	Bd21,Bd21-3,Bd30-1,Bd3-1,BdTR12c,Koz-3	Bd1-1
Bd2	33905109	33905374	Bd2TE2719229	Bd21,Bd21-3,Bd30-1,Bd3-1,BdTR12c,Koz-3	Bd1-1
Bd2	33929972	33935381	Bd2TE2694517	Bd21,Bd21-3,Bd30-1,Bd3-1,BdTR12c,Koz-3	Bd1-1
Bd2	33931134	33931184	Bd1TE2748380	Bd1-1	Bd21,Bd21-3,Bd30-1,Bd3-1,BdTR12c,Koz-3
Bd2	33931138	33932852	Bd2TE2712263	Bd21,Bd21-3,Bd30-1,Bd3-1,BdTR12c,Koz-3	Bd1-1
Bd2	34041709	34043091	Bd2TE2712829	Bd21,Bd30-1,Bd3-1,BdTR12c,Koz-3	Bd21-3,Bd1-1
Bd2	34160051	34162297	Bd2TE2711432	Bd21,Bd21-3,Bd30-1,Bd3-1,BdTR12c,Koz-3	Bd1-1
Bd2	34162298	34163310	Bd2TE2714092	Bd21,Bd1-1,Bd21-3,Bd3-1,BdTR12c,Koz-3	Bd30-1
Bd2	34268257	34272199	Bd2TE2694472	Bd21,Bd1-1,Bd30-1,Bd3-1,BdTR12c,Koz-3	Bd21-3
Bd2	34355936	34356114	Bd2TE2721003	Bd21,Bd1-1,Bd30-1,Bd3-1,BdTR12c	Koz-3,Bd21-3
Bd2	34355967	34356090	Bd2TE2700400	Bd21,Bd1-1,Bd3-1,BdTR12c	Koz-3,Bd21-3,Bd30-1
Bd2	34607301	34611093	Bd2TE2709928	Bd21,Bd21-3,Bd30-1,Bd3-1,BdTR12c,Koz-3	Bd1-1
Bd2	34725471	34726958	Bd2TE2712647	Bd21,Bd21-3,Bd30-1,Bd3-1,BdTR12c,Koz-3	Bd1-1
Bd2	34727012	34730657	Bd2TE2709997	Bd21,Bd21-3,Bd30-1,Bd3-1,BdTR12c,Koz-3	Bd1-1
Bd2	34843881	34844382	Bd2TE2696489	Bd21,Bd1-1,Bd30-1,BdTR12c	Koz-3,Bd3-1,Bd21-3
Bd2	34844644	34844680	Bd1TE2780270	BdTR12c,Bd1-1	Bd21,Bd21-3,Bd30-1,Bd3-1,Koz-3
Bd2	34851752	34851842	Bd2TE2694949	Bd1-1	Bd21,Bd21-3,Bd30-1,Bd3-1,BdTR12c,Koz-3
Bd2	34886223	34890394	Bd2TE2709715	Bd21,Bd30-1,Bd3-1,BdTR12c,Koz-3	Bd21-3,Bd1-1
Bd2	34890395	34891273	Bd2TE2714810	Bd21,Bd1-1,Bd30-1,Bd3-1,BdTR12c,Koz-3	Bd21-3
Bd2	34998422	34998538	Bd2TE2701253	Bd21,Bd1-1,Bd21-3,Bd30-1,Bd3-1,Koz-3	BdTR12c
Bd2	34998748	35002591	Bd2TE2694486	Bd21,Bd1-1,Bd21-3,Bd30-1,Bd3-1,Koz-3	BdTR12c
Bd2	35021281	35021333	Bd1TE2784065	BdTR12c	Bd21,Bd1-1,Bd21-3,Bd30-1,Bd3-1,Koz-3
Bd2	35026695	35026877	Bd2TE2698740	Bd21,Bd21-3,Bd30-1,Bd3-1,Koz-3	BdTR12c,Bd1-1
Bd2	35030851	35030936	Bd1TE2747659	BdTR12c	Bd21,Bd1-1,Bd21-3,Bd30-1,Bd3-1,Koz-3
Bd2	35030861	35030956	Bd3TE2690135	Bd1-1	Bd21,Bd21-3,Bd30-1,Bd3-1,BdTR12c,Koz-3
Bd2	35045103	35045264	Bd2TE2721672	Bd21,Bd1-1,Bd21-3,Bd30-1,BdTR12c,Koz-3	Bd3-1
Bd2	35066407	35066560	Bd2TE2722029	Bd21,Bd21-3,Bd30-1,Bd3-1,Koz-3	BdTR12c,Bd1-1
Bd2	35104906	35104943	Bd4TE2683569	BdTR12c	Bd21,Bd1-1,Bd21-3,Bd30-1,Bd3-1,Koz-3
Bd2	35199256	35199372	Bd2TE2702144	Bd21,Bd1-1,Bd30-1,Bd3-1,BdTR12c,Koz-3	Bd21-3
Bd2	35199966	35200426	Bd2TE2717274	Bd21,Bd1-1,Bd30-1,Bd3-1,BdTR12c,Koz-3	Bd21-3
Bd2	35208375	35208502	Bd2TE2700123	Bd21,Bd1-1,Koz-3	Bd3-1,Bd21-3,BdTR12c,Bd30-1
Bd2	35231341	35231510	Bd2TE2699060	Bd21,Bd1-1,Bd21-3,Koz-3	Bd3-1,BdTR12c,Bd30-1
Bd2	35287024	35290993	Bd2TE2694467	Bd21,Koz-3	Bd3-1,Bd21-3,Bd1-1,BdTR12c,Bd30-1
Bd2	35493408	35493457	Bd2TE2693968	Bd3-1	Bd21,Bd1-1,Bd21-3,Bd30-1,BdTR12c,Koz-3
Bd2	35502497	35503773	Bd2TE2713134	Bd21,Bd21-3,Bd3-1,Koz-3	BdTR12c,Bd1-1,Bd30-1
Bd2	35620804	35620870	Bd2TE2722989	Bd21,Bd21-3,Bd30-1,Bd3-1,BdTR12c,Koz-3	Bd1-1
Bd2	35620934	35623414	Bd2TE2711143	Bd21,Bd21-3,Bd30-1,Bd3-1,BdTR12c,Koz-3	Bd1-1
Bd2	35876125	35882346	Bd2TE2708987	Bd21,Bd21-3,Bd3-1,Koz-3	BdTR12c,Bd1-1,Bd30-1
Bd2	35948710	35948752	Bd1TE2765886,Bd1TE2766792	Bd30-1	Bd21,Bd1-1,Bd21-3,Bd3-1,BdTR12c,Koz-3
Bd2	35949441	35951153	Bd2TE2712278	Bd21,Bd3-1	Koz-3,Bd21-3,Bd1-1,BdTR12c,Bd30-1
Bd2	36026296	36026367	Bd2TE2707781	Bd21,Bd30-1,Bd3-1,BdTR12c,Koz-3	Bd21-3,Bd1-1
Bd2	36028229	36031216	Bd2TE2710670	Bd21,Bd21-3,Bd30-1,Bd3-1,BdTR12c,Koz-3	Bd1-1
Bd2	36173433	36173768	Bd2TE2696898	Bd21,Bd1-1,Bd21-3,Bd3-1,BdTR12c,Koz-3	Bd30-1
Bd2	36323808	36324868	Bd2TE2713888	Bd21,Bd1-1,Bd21-3,Bd3-1,BdTR12c	Koz-3,Bd30-1
Bd2	36442884	36442924	Bd5TE2645106	Bd21-3	Bd21,Bd1-1,Bd30-1,Bd3-1,BdTR12c,Koz-3
Bd2	36464288	36464521	Bd2TE2719728	Bd21,Bd1-1,Bd21-3,Bd30-1,BdTR12c,Koz-3	Bd3-1
Bd2	36827821	36828042	Bd2TE2719989	Bd21,Bd1-1,Bd21-3,Bd3-1,BdTR12c	Koz-3,Bd30-1
Bd2	36904321	36908745	Bd2TE2694444	Bd21,Bd30-1,Bd3-1,BdTR12c,Koz-3	Bd21-3,Bd1-1
Bd2	36909227	36909337	Bd2TE2703175	Bd21,Bd1-1,Bd30-1,Bd3-1,BdTR12c,Koz-3	Bd21-3
Bd2	36954889	36954961	Bd2TE2707726	Bd21,Bd21-3,Bd3-1,Koz-3	BdTR12c,Bd1-1,Bd30-1
Bd2	36983301	36983471	Bd2TE2699036	Bd21,Bd1-1,Bd21-3,Bd30-1,Bd3-1,BdTR12c	Koz-3
Bd2	37136071	37136198	Bd2TE2700055	Bd21,Bd1-1	Koz-3,Bd3-1,Bd21-3,BdTR12c,Bd30-1
Bd2	37175343	37176205	Bd2TE2714895	Bd21,Bd21-3,Bd30-1,Bd3-1,BdTR12c,Koz-3	Bd1-1
Bd2	37176650	37176706	Bd2TE2724802	Bd21,Bd21-3,Bd30-1,Bd3-1,BdTR12c,Koz-3	Bd1-1
Bd2	37280714	37282042	Bd2TE2713101	Bd21,Bd21-3,Bd30-1,Bd3-1,BdTR12c,Koz-3	Bd1-1
Bd2	37283991	37287485	Bd2TE2694588	Bd21,Bd30-1,Bd3-1,BdTR12c,Koz-3	Bd21-3,Bd1-1
Bd2	37322282	37322424	Bd2TE2699644	Bd21,Bd21-3,Bd30-1,Bd3-1,BdTR12c,Koz-3	Bd1-1
Bd2	37322643	37322762	Bd2TE2723024	Bd21,Bd21-3,Bd30-1,Bd3-1,BdTR12c,Koz-3	Bd1-1
Bd2	37329319	37330643	Bd2TE2713171	Bd21,Bd21-3,Bd30-1,Bd3-1,BdTR12c,Koz-3	Bd1-1
Bd2	37404519	37405274	Bd2TE2715460	Bd21,Bd21-3,Bd30-1,Bd3-1,BdTR12c,Koz-3	Bd1-1
Bd2	38059426	38059532	Bd2TE2694913	Bd1-1	Bd21,Bd21-3,Bd30-1,Bd3-1,BdTR12c,Koz-3
Bd2	38138737	38138858	Bd2TE2700524	Bd21,Bd1-1,Bd21-3,Bd30-1,BdTR12c,Koz-3	Bd3-1
Bd2	38218209	38231863	Bd2TE2708490	Bd21,Bd21-3,Bd3-1,BdTR12c,Koz-3	Bd1-1,Bd30-1
Bd2	38255260	38255303	Bd2TE2706184	Bd1-1	Bd21,Bd21-3,Bd30-1,Bd3-1,BdTR12c,Koz-3
Bd2	38265927	38266042	Bd2TE2702255	Bd21,Bd21-3,Bd30-1,Bd3-1,BdTR12c	Koz-3,Bd1-1
Bd2	38385319	38389440	Bd2TE2709748	Bd21,Bd1-1,Bd30-1,Bd3-1,BdTR12c,Koz-3	Bd21-3
Bd2	38412930	38413810	Bd2TE2714795	Bd21,Bd30-1,Bd3-1,BdTR12c,Koz-3	Bd21-3,Bd1-1
Bd2	38413811	38416727	Bd2TE2710697	Bd21,Bd21-3,Bd30-1,Bd3-1,BdTR12c,Koz-3	Bd1-1
Bd2	38420186	38421198	Bd2TE2714096	Bd21,Bd21-3,Bd30-1,Bd3-1,BdTR12c,Koz-3	Bd1-1
Bd2	38421305	38423369	Bd2TE2711685	Bd21,Bd21-3,Bd30-1,Bd3-1,BdTR12c,Koz-3	Bd1-1
Bd2	38423370	38425779	Bd2TE2711221	Bd21,Bd21-3,Bd30-1,Bd3-1,BdTR12c,Koz-3	Bd1-1
Bd2	38425780	38427551	Bd2TE2712127	Bd21,Bd30-1,Bd3-1,BdTR12c,Koz-3	Bd21-3,Bd1-1
Bd2	38684463	38685791	Bd2TE2713107	Bd21,Bd1-1,Bd21-3,Bd3-1,BdTR12c,Koz-3	Bd30-1
Bd2	38731782	38735863	Bd2TE2709772	Bd21,Bd1-1,Bd30-1,Bd3-1,BdTR12c,Koz-3	Bd21-3
Bd2	38857855	38862847	Bd2TE2694328	Bd21,Bd1-1,Bd30-1,Bd3-1,BdTR12c,Koz-3	Bd21-3
Bd2	38981633	38982452	Bd2TE2715136	Bd21,Bd21-3,Bd3-1,Koz-3	BdTR12c,Bd1-1,Bd30-1
Bd2	39068424	39068541	Bd2TE2700908	Bd21,Bd1-1,Bd21-3,Bd3-1,Koz-3	BdTR12c,Bd30-1
Bd2	39072507	39077394	Bd2TE2694342	Bd21,Bd1-1,Bd21-3,Bd3-1,Koz-3	BdTR12c,Bd30-1
Bd2	39304283	39309483	Bd2TE2709292	Bd21,Koz-3	Bd3-1,Bd21-3,Bd1-1,BdTR12c,Bd30-1
Bd2	39321371	39321421	Bd5TE2645049	Bd30-1	Bd21,Bd1-1,Bd21-3,Bd3-1,BdTR12c,Koz-3
Bd2	39380655	39380951	Bd2TE2718849	Bd21,Bd1-1,Bd21-3,Bd3-1,Koz-3	BdTR12c,Bd30-1
Bd2	39402532	39402581	Bd5TE2644620,Bd5TE2640681	Koz-3	Bd21,Bd1-1,Bd21-3,Bd30-1,Bd3-1,BdTR12c
Bd2	39536388	39536481	Bd2TE2723747	Bd21,Bd1-1,Bd21-3,Bd30-1,Bd3-1,Koz-3	BdTR12c
Bd2	39553919	39557457	Bd2TE2710070	Bd21,Bd21-3,Bd30-1,Bd3-1,BdTR12c,Koz-3	Bd1-1
Bd2	39582386	39582440	Bd2TE2725063	Bd21,Bd21-3,Bd30-1,Bd3-1,BdTR12c,Koz-3	Bd1-1
Bd2	39582441	39584155	Bd2TE2712269	Bd21,Bd21-3,Bd30-1,Bd3-1,BdTR12c,Koz-3	Bd1-1
Bd2	39690600	39694230	Bd2TE2710012	Bd21,BdTR12c,Koz-3	Bd3-1,Bd21-3,Bd1-1,Bd30-1
Bd2	39704779	39704853	Bd1TE2780380	Bd21-3	Bd21,Bd1-1,Bd30-1,Bd3-1,BdTR12c,Koz-3
Bd2	39767363	39768450	Bd2TE2713817	Bd21,Bd1-1,Bd21-3,Bd3-1,BdTR12c,Koz-3	Bd30-1
Bd2	40064911	40064984	Bd2TE2708528	Bd1-1	Bd21,Bd21-3,Bd30-1,Bd3-1,BdTR12c,Koz-3
Bd2	40064937	40066265	Bd2TE2713109	Bd21,Bd21-3	Koz-3,Bd3-1,BdTR12c,Bd1-1,Bd30-1
Bd2	40161045	40165099	Bd2TE2710422	Bd21,Bd21-3,Bd30-1,Bd3-1,BdTR12c,Koz-3	Bd1-1
Bd2	40162876	40163095	Bd2TE2720022	Bd21,Bd21-3,Bd30-1,Bd3-1,BdTR12c,Koz-3	Bd1-1
Bd2	40163096	40163575	Bd2TE2717122	Bd21,Bd21-3,Bd30-1,Bd3-1,BdTR12c,Koz-3	Bd1-1
Bd2	40165106	40165350	Bd2TE2719538	Bd21,Bd21-3,Bd30-1,Bd3-1,BdTR12c,Koz-3	Bd1-1
Bd2	40251101	40251428	Bd2TE2718488	Bd21,Bd21-3,Bd30-1,Bd3-1,BdTR12c,Koz-3	Bd1-1
Bd2	40253095	40253842	Bd2TE2715515	Bd21,Bd21-3,Bd30-1,Bd3-1,BdTR12c,Koz-3	Bd1-1
Bd2	40266303	40267056	Bd2TE2715483	Bd21,Bd1-1,Bd21-3,Bd30-1,Bd3-1,BdTR12c	Koz-3
Bd2	40267057	40268386	Bd2TE2713100	Bd21,Bd21-3,Bd30-1,Bd3-1,BdTR12c,Koz-3	Bd1-1
Bd2	40290783	40292109	Bd2TE2713140	Bd21,Bd1-1,Bd21-3,Bd30-1,Bd3-1	Koz-3,BdTR12c
Bd2	40295445	40295647	Bd2TE2720403	Bd21,Bd1-1,Bd21-3,Bd30-1,Bd3-1	Koz-3,BdTR12c
Bd2	40295648	40296357	Bd2TE2715655	Bd21,Bd1-1,Bd21-3,Bd30-1,Bd3-1	Koz-3,BdTR12c
Bd2	40372979	40373969	Bd2TE2714249	Bd21,Bd21-3,Bd30-1,Bd3-1,BdTR12c,Koz-3	Bd1-1
Bd2	40373970	40377551	Bd2TE2710050	Bd21,Bd21-3,Bd30-1,Bd3-1,BdTR12c,Koz-3	Bd1-1
Bd2	40415941	40419061	Bd2TE2710557	Bd21,Bd1-1,Bd21-3,Bd30-1,Bd3-1,BdTR12c	Koz-3
Bd2	40425633	40426535	Bd2TE2714680	Bd21,Bd1-1,Bd21-3,Bd3-1,BdTR12c,Koz-3	Bd30-1
Bd2	40487651	40488156	Bd2TE2716901	Bd21,Bd1-1,Bd21-3,Bd30-1,Bd3-1,BdTR12c	Koz-3
Bd2	40492410	40492462	Bd1TE2767804	BdTR12c	Bd21,Bd1-1,Bd21-3,Bd30-1,Bd3-1,Koz-3
Bd2	40492718	40497365	Bd2TE2709487	Bd21,Bd21-3,Bd30-1,Bd3-1	Koz-3,BdTR12c,Bd1-1
Bd2	40615085	40616127	Bd2TE2695742	Bd21,Bd1-1,Bd21-3,Bd30-1,Bd3-1,BdTR12c	Koz-3
Bd2	40689363	40697383	Bd2TE2694049	Bd21,Bd30-1,Bd3-1,BdTR12c,Koz-3	Bd21-3,Bd1-1
Bd2	40698198	40699522	Bd2TE2713169	Bd21,Bd30-1,Bd3-1,BdTR12c,Koz-3	Bd21-3,Bd1-1
Bd2	40700691	40701190	Bd2TE2716949	Bd21,Bd30-1,Bd3-1,BdTR12c,Koz-3	Bd21-3,Bd1-1
Bd2	40701191	40701295	Bd2TE2723404	Bd21,Bd30-1,Bd3-1,BdTR12c,Koz-3	Bd21-3,Bd1-1
Bd2	40714922	40715193	Bd2TE2719134	Bd21,Bd21-3,Bd30-1,Bd3-1,BdTR12c,Koz-3	Bd1-1
Bd2	40720643	40720955	Bd2TE2718641	Bd21,Bd21-3,Bd30-1,Bd3-1,BdTR12c,Koz-3	Bd1-1
Bd2	40752946	40752979	Bd5TE2637728	BdTR12c	Bd21,Bd1-1,Bd21-3,Bd30-1,Bd3-1,Koz-3
Bd2	40872042	40872092	Bd1TE2747496	BdTR12c	Bd21,Bd1-1,Bd21-3,Bd30-1,Bd3-1,Koz-3
Bd2	40897031	40897125	Bd2TE2697784	BdTR12c	Bd21,Bd1-1,Bd21-3,Bd30-1,Bd3-1,Koz-3
Bd2	40905201	40908857	Bd2TE2694529	Bd21,Bd1-1,Bd30-1,Bd3-1,BdTR12c,Koz-3	Bd21-3
Bd2	41053339	41054665	Bd2TE2713136	Bd21,Bd1-1,Bd21-3,Bd30-1,Bd3-1,BdTR12c	Koz-3
Bd2	41218923	41222468	Bd2TE2694567	Bd21,Bd30-1,Bd3-1,BdTR12c,Koz-3	Bd21-3,Bd1-1
Bd2	41255469	41257687	Bd2TE2694967	Bd21,Bd1-1,Bd30-1,Bd3-1,BdTR12c,Koz-3	Bd21-3
Bd2	41389815	41390014	Bd2TE2698381	Bd21,Bd1-1,Bd21-3,Bd3-1,Koz-3	BdTR12c,Bd30-1
Bd2	41399632	41399728	Bd2TE2704958	Bd21,Bd1-1,Bd21-3,Bd30-1,Bd3-1,Koz-3	BdTR12c
Bd2	41560233	41563654	Bd2TE2694614	Bd21,Bd21-3,Bd30-1,Bd3-1,BdTR12c,Koz-3	Bd1-1
Bd2	41588190	41589163	Bd2TE2714342	Bd21,Bd21-3,Bd30-1,Bd3-1,BdTR12c,Koz-3	Bd1-1
Bd2	41589164	41601448	Bd2TE2710016	Bd21,Bd21-3,Bd30-1,Bd3-1,BdTR12c,Koz-3	Bd1-1
Bd2	41590699	41599354	Bd2TE2693997	Bd21,Bd21-3,Bd30-1,Bd3-1,BdTR12c,Koz-3	Bd1-1
Bd2	41617766	41621468	Bd2TE2694515	Bd21,Bd30-1,Bd3-1,BdTR12c,Koz-3	Bd21-3,Bd1-1
Bd2	41621481	41621591	Bd2TE2703267	Bd21,Bd30-1,Bd3-1,BdTR12c,Koz-3	Bd21-3,Bd1-1
Bd2	41650481	41650559	Bd2TE2724217	Bd21,Bd1-1,Bd21-3,Bd30-1,Bd3-1,Koz-3	BdTR12c
Bd2	41721129	41721234	Bd2TE2703769	Bd21,Bd1-1,Bd30-1,Bd3-1,BdTR12c,Koz-3	Bd21-3
Bd2	41784455	41784698	Bd2TE2697617	Bd21,Bd21-3,Bd30-1,Bd3-1,BdTR12c,Koz-3	Bd1-1
Bd2	41800537	41801221	Bd2TE2715805	Bd21,Bd21-3,Bd30-1,Bd3-1,BdTR12c,Koz-3	Bd1-1
Bd2	41974486	41975806	Bd2TE2713199	Bd21,Bd30-1,Bd3-1,BdTR12c,Koz-3	Bd21-3,Bd1-1
Bd2	42016095	42016189	Bd2TE2705374	Bd21,Bd30-1,Bd3-1,BdTR12c,Koz-3	Bd21-3,Bd1-1
Bd2	42016313	42020037	Bd2TE2694513	Bd21,Bd30-1,Bd3-1,BdTR12c,Koz-3	Bd21-3,Bd1-1
Bd2	42142478	42142662	Bd2TE2720837	Bd21,Bd21-3,Bd30-1,Bd3-1,BdTR12c,Koz-3	Bd1-1
Bd2	42142664	42154785	Bd2TE2693871	Bd21,Bd21-3,Bd30-1,Bd3-1	Koz-3,BdTR12c,Bd1-1
Bd2	42154782	42154826	Bd2TE2720837	Koz-3,BdTR12c	Bd21,Bd1-1,Bd21-3,Bd30-1,Bd3-1
Bd2	42154840	42154975	Bd2TE2722591	Bd21,Bd21-3,Bd30-1,Bd3-1,BdTR12c,Koz-3	Bd1-1
Bd2	42273923	42278405	Bd2TE2709560	Bd21,Bd1-1,Bd30-1,Bd3-1,BdTR12c,Koz-3	Bd21-3
Bd2	42280891	42281084	Bd2TE2720591	Bd21,Bd21-3,Bd30-1,Bd3-1,BdTR12c,Koz-3	Bd1-1
Bd2	42288974	42289688	Bd2TE2715642	Bd21,Bd21-3,Bd30-1,Bd3-1,BdTR12c,Koz-3	Bd1-1
Bd2	42333677	42334506	Bd2TE2715099	Bd21,Bd30-1,Bd3-1,BdTR12c,Koz-3	Bd21-3,Bd1-1
Bd2	42441372	42442331	Bd2TE2714400	Bd21,Bd3-1,BdTR12c,Koz-3	Bd21-3,Bd1-1,Bd30-1
Bd2	42445676	42445724	Bd1TE2778468,Bd1TE2756173	BdTR12c	Bd21,Bd1-1,Bd21-3,Bd30-1,Bd3-1,Koz-3
Bd2	42460006	42460118	Bd2TE2702838	Bd21,Bd1-1,Bd30-1,Bd3-1,BdTR12c,Koz-3	Bd21-3
Bd2	42480684	42480733	Bd1TE2770932	Bd21-3	Bd21,Bd1-1,Bd30-1,Bd3-1,BdTR12c,Koz-3
Bd2	42892953	42893346	Bd2TE2717871	Bd21,Bd30-1,Bd3-1,Koz-3	Bd21-3,Bd1-1,BdTR12c
Bd2	42893347	42901515	Bd2TE2694034	Bd21,Bd30-1,Bd3-1,Koz-3	Bd21-3,Bd1-1,BdTR12c
Bd2	43077183	43081015	Bd2TE2709911	Bd21,Bd21-3,Bd30-1,Bd3-1,BdTR12c,Koz-3	Bd1-1
Bd2	43122803	43123420	Bd2TE2716150	Bd21,Bd21-3,Bd30-1,Bd3-1,BdTR12c,Koz-3	Bd1-1
Bd2	43123434	43125228	Bd2TE2712083	Bd21,Bd21-3,Bd30-1,Bd3-1,BdTR12c,Koz-3	Bd1-1
Bd2	43459463	43462588	Bd2TE2694699	Bd21,Bd21-3,Bd3-1,BdTR12c,Koz-3	Bd1-1,Bd30-1
Bd2	43468325	43468369	Bd2TE2724744	BdTR12c	Bd21,Bd1-1,Bd21-3,Bd30-1,Bd3-1,Koz-3
Bd2	43495285	43496639	Bd2TE2712940	Bd21,Bd21-3,Bd3-1,BdTR12c,Koz-3	Bd1-1,Bd30-1
Bd2	43495295	43495340	Bd1TE2771225	Bd1-1	Bd21,Bd21-3,Bd30-1,Bd3-1,BdTR12c,Koz-3
Bd2	43506734	43507822	Bd2TE2713813	Bd21,Bd1-1,Bd21-3,Bd30-1,Bd3-1,BdTR12c	Koz-3
Bd2	43610496	43614053	Bd2TE2694557	Bd21,Bd30-1,Bd3-1,BdTR12c,Koz-3	Bd21-3,Bd1-1
Bd2	43752649	43753540	Bd2TE2714748	Bd21,Bd1-1,Bd30-1,Bd3-1,BdTR12c,Koz-3	Bd21-3
Bd2	43772342	43772604	Bd2TE2697305	Bd21,Bd21-3,Bd30-1,Bd3-1,BdTR12c,Koz-3	Bd1-1
Bd2	43800073	43800344	Bd2TE2697225	Bd21,Bd21-3,Bd30-1,Bd3-1,BdTR12c,Koz-3	Bd1-1
Bd2	43801205	43802549	Bd2TE2713016	Bd21,Bd30-1,Bd3-1,BdTR12c,Koz-3	Bd21-3,Bd1-1
Bd2	43802550	43803255	Bd2TE2715675	Bd21,Bd30-1,Bd3-1,BdTR12c,Koz-3	Bd21-3,Bd1-1
Bd2	43908671	43908992	Bd2TE2718554	Bd21,Bd21-3,Bd30-1,Bd3-1,BdTR12c,Koz-3	Bd1-1
Bd2	44410049	44411746	Bd2TE2712317	Bd21,Bd21-3,Bd3-1,BdTR12c,Koz-3	Bd1-1,Bd30-1
Bd2	44615876	44620049	Bd2TE2709713	Bd21,Bd1-1,Bd30-1,Bd3-1,BdTR12c,Koz-3	Bd21-3
Bd2	44620051	44620559	Bd2TE2716885	Bd21,Bd1-1,Bd30-1,Bd3-1,BdTR12c,Koz-3	Bd21-3
Bd2	44770631	44771342	Bd2TE2715649	Bd21,Bd1-1,Bd30-1,Bd3-1,BdTR12c,Koz-3	Bd21-3
Bd2	44819536	44820540	Bd2TE2714143	Bd21,Bd21-3,Bd30-1,Bd3-1,BdTR12c,Koz-3	Bd1-1
Bd2	44831598	44835520	Bd2TE2694476	Bd21,Bd1-1,Bd30-1,Bd3-1,BdTR12c,Koz-3	Bd21-3
Bd2	45093055	45093407	Bd2TE2718203	Bd21,Bd1-1,Bd21-3,Bd30-1,Bd3-1,BdTR12c	Koz-3
Bd2	45151583	45154762	Bd2TE2710492	Bd21,Bd21-3,Bd30-1,Bd3-1,BdTR12c,Koz-3	Bd1-1
Bd2	45338546	45343324	Bd2TE2709432	Bd21,Bd21-3,Bd30-1,Bd3-1,BdTR12c,Koz-3	Bd1-1
Bd2	45668203	45670499	Bd2TE2711366	Bd21,Bd21-3,Bd30-1,Bd3-1,BdTR12c,Koz-3	Bd1-1
Bd2	45670500	45671496	Bd2TE2714202	Bd21,Bd21-3,Bd30-1,Bd3-1,BdTR12c,Koz-3	Bd1-1
Bd2	45944361	45945686	Bd2TE2713163	Bd21,Bd30-1,Bd3-1,BdTR12c,Koz-3	Bd21-3,Bd1-1
Bd2	46027581	46030573	Bd2TE2719404	Bd21,Bd1-1,Bd30-1,Bd3-1,BdTR12c,Koz-3	Bd21-3
Bd2	46027583	46027672	Bd2TE2706084	Bd21,Bd1-1,Bd30-1,Bd3-1,BdTR12c,Koz-3	Bd21-3
Bd2	46030385	46030554	Bd2TE2699068	Bd21,Bd1-1,Bd30-1,Bd3-1,BdTR12c,Koz-3	Bd21-3
Bd2	46030574	46030719	Bd2TE2699618	Bd21,Bd1-1,Bd30-1,Bd3-1,BdTR12c,Koz-3	Bd21-3
Bd2	46033470	46034763	Bd2TE2713225	Bd21,Bd1-1,Bd21-3,Bd3-1,BdTR12c,Koz-3	Bd30-1
Bd2	46321777	46321904	Bd2TE2700078	Bd21,Bd1-1,Bd21-3,Bd30-1,BdTR12c,Koz-3	Bd3-1
Bd2	46395373	46406340	Bd2TE2708560	Bd21,Bd21-3,Bd30-1,Bd3-1,BdTR12c,Koz-3	Bd1-1
Bd2	46396677	46396948	Bd2TE2697229	Bd21,Bd21-3,Bd30-1,Bd3-1,BdTR12c,Koz-3	Bd1-1
Bd2	46408169	46423895	Bd2TE2693863	Bd21,Bd21-3,Bd30-1,Bd3-1,BdTR12c,Koz-3	Bd1-1
Bd2	46419060	46422382	Bd2TE2710262	Bd21,Bd21-3,Bd30-1,Bd3-1,BdTR12c,Koz-3	Bd1-1
Bd2	46486762	46487006	Bd2TE2697558	Bd21,Bd21-3,Bd30-1,Bd3-1,BdTR12c,Koz-3	Bd1-1
Bd2	46539010	46539133	Bd2TE2722902	Bd21,Bd30-1,Bd3-1,BdTR12c,Koz-3	Bd21-3,Bd1-1
Bd2	46539134	46542917	Bd2TE2694501	Bd21,Bd30-1,Bd3-1,BdTR12c,Koz-3	Bd21-3,Bd1-1
Bd2	46755714	46759010	Bd2TE2710331	Bd21,Bd21-3,Bd30-1,Bd3-1,BdTR12c,Koz-3	Bd1-1
Bd2	47093261	47093341	Bd2TE2724128	Bd21,Bd1-1,Bd21-3,Bd30-1,Bd3-1,Koz-3	BdTR12c
Bd2	47224196	47224267	Bd2TE2720655	Bd21-3	Bd21,Bd1-1,Bd30-1,Bd3-1,BdTR12c,Koz-3
Bd2	47382095	47382183	Bd5TE2638657	Bd30-1	Bd21,Bd1-1,Bd21-3,Bd3-1,BdTR12c,Koz-3
Bd2	47453797	47465902	Bd2TE2710164	Bd21,Bd21-3,Bd30-1,Bd3-1,BdTR12c,Koz-3	Bd1-1
Bd2	47456453	47465141	Bd2TE2693995	Bd21,Bd21-3,Bd30-1,Bd3-1,BdTR12c,Koz-3	Bd1-1
Bd2	47465903	47467085	Bd2TE2713602	Bd21,Bd21-3,Bd30-1,Bd3-1,BdTR12c,Koz-3	Bd1-1
Bd2	47467086	47467540	Bd2TE2717325	Bd21,Bd21-3,Bd30-1,Bd3-1,BdTR12c,Koz-3	Bd1-1
Bd2	47469024	47470941	Bd2TE2711906	Bd21,Bd1-1,Bd21-3,Bd3-1,BdTR12c,Koz-3	Bd30-1
Bd2	47514388	47514450	Bd2TE2724766	Bd21,Bd21-3,Bd30-1,Bd3-1,BdTR12c,Koz-3	Bd1-1
Bd2	47583112	47583222	Bd2TE2703105	Bd21,Bd21-3,Bd3-1	Koz-3,BdTR12c,Bd1-1,Bd30-1
Bd2	47626760	47626790	Bd2TE2723518	BdTR12c	Bd21,Bd1-1,Bd21-3,Bd30-1,Bd3-1,Koz-3
Bd2	47808253	47811885	Bd2TE2694537	Bd21,Bd30-1,Bd3-1,BdTR12c,Koz-3	Bd21-3,Bd1-1
Bd2	47914308	47915024	Bd2TE2715636	Bd21,Bd21-3,BdTR12c,Koz-3	Bd3-1,Bd1-1,Bd30-1
Bd2	48146433	48150357	Bd2TE2694474	Bd21,Bd30-1,Bd3-1,BdTR12c,Koz-3	Bd21-3,Bd1-1
Bd2	48283314	48283648	Bd2TE2696907	Bd21,Bd1-1,Bd30-1,Bd3-1,BdTR12c,Koz-3	Bd21-3
Bd2	48283649	48288104	Bd2TE2694403	Bd21,Bd1-1,Bd30-1,Bd3-1,BdTR12c,Koz-3	Bd21-3
Bd2	48801283	48801409	Bd2TE2700259	Bd21,Bd21-3,Bd3-1,BdTR12c,Koz-3	Bd1-1,Bd30-1
Bd2	49033098	49037781	Bd2TE2694363	Bd21,Bd1-1,Bd30-1,Bd3-1,BdTR12c,Koz-3	Bd21-3
Bd2	49097041	49101313	Bd2TE2694424	Bd21,Bd1-1,Bd30-1,Bd3-1,BdTR12c,Koz-3	Bd21-3
Bd2	49154494	49154687	Bd2TE2698529	Bd21,Bd21-3,Bd3-1,BdTR12c,Koz-3	Bd1-1,Bd30-1
Bd2	49368983	49369703	Bd2TE2715615	Bd21,Bd1-1,BdTR12c	Koz-3,Bd3-1,Bd21-3,Bd30-1
Bd2	49443568	49443872	Bd2TE2718721	Bd21,Bd30-1,Bd3-1,BdTR12c,Koz-3	Bd21-3,Bd1-1
Bd2	49448936	49450291	Bd2TE2712930	Bd21,Bd21-3,Bd30-1,Bd3-1,BdTR12c,Koz-3	Bd1-1
Bd2	49722831	49726956	Bd2TE2709740	Bd21,Bd21-3,Bd30-1,Bd3-1,BdTR12c,Koz-3	Bd1-1
Bd2	49766067	49766194	Bd2TE2700001	Bd21,Bd1-1,Bd3-1	Koz-3,Bd21-3,BdTR12c,Bd30-1
Bd2	49922890	49927685	Bd2TE2709428	Bd21,Bd1-1,Bd30-1,Bd3-1,BdTR12c,Koz-3	Bd21-3
Bd2	50164485	50165093	Bd2TE2696264	Bd21,Bd1-1,Bd30-1,Bd3-1,BdTR12c,Koz-3	Bd21-3
Bd2	50530159	50530189	Bd2TE2700347	Koz-3	Bd21,Bd1-1,Bd21-3,Bd30-1,Bd3-1,BdTR12c
Bd2	50710158	50714040	Bd2TE2709874	Bd21,Bd30-1,Bd3-1,BdTR12c,Koz-3	Bd21-3,Bd1-1
Bd2	50714514	50714622	Bd2TE2703494	Bd21,Bd1-1,Bd30-1,Bd3-1,BdTR12c,Koz-3	Bd21-3
Bd2	50812134	50812237	Bd2TE2704084	Bd21,Bd1-1,Bd30-1,Bd3-1,BdTR12c,Koz-3	Bd21-3
Bd2	50812282	50812519	Bd2TE2697778	Bd21,Bd1-1,Bd30-1,Bd3-1,BdTR12c,Koz-3	Bd21-3
Bd2	50812859	50817164	Bd2TE2694419	Bd21,Bd1-1,Bd30-1,Bd3-1,BdTR12c,Koz-3	Bd21-3
Bd2	51086325	51086441	Bd2TE2701991	Bd21,Bd30-1,Bd3-1,BdTR12c,Koz-3	Bd21-3,Bd1-1
Bd2	51390253	51390369	Bd2TE2701129	Bd21,Bd21-3,Bd30-1,Bd3-1,BdTR12c,Koz-3	Bd1-1
Bd2	51540891	51544421	Bd2TE2694572	Bd21,Bd30-1,Bd3-1,BdTR12c,Koz-3	Bd21-3,Bd1-1
Bd2	52003451	52003665	Bd2TE2698105	Bd21,Bd1-1,Bd30-1,BdTR12c,Koz-3	Bd3-1,Bd21-3
Bd2	52226548	52230753	Bd2TE2709687	Bd21,Bd30-1,Bd3-1,BdTR12c,Koz-3	Bd21-3,Bd1-1
Bd2	52553812	52553947	Bd2TE2699727	Bd21,Bd30-1,Bd3-1,BdTR12c,Koz-3	Bd21-3,Bd1-1
Bd2	52554759	52554858	Bd2TE2704552	Bd21,Bd30-1,Bd3-1,BdTR12c,Koz-3	Bd21-3,Bd1-1
Bd2	52717801	52717969	Bd2TE2699093	Bd21,Bd1-1,Bd30-1,Bd3-1,BdTR12c,Koz-3	Bd21-3
Bd2	52800020	52800747	Bd2TE2715580	Bd21,Bd21-3,Bd30-1,Bd3-1,BdTR12c,Koz-3	Bd1-1
Bd2	53144367	53144585	Bd2TE2698040	Bd21,Bd21-3,Bd30-1,Bd3-1,BdTR12c,Koz-3	Bd1-1
Bd2	53165154	53168680	Bd2TE2694574	Bd21,Bd21-3,Bd30-1,Bd3-1,BdTR12c,Koz-3	Bd1-1
Bd2	53358010	53359337	Bd2TE2713115	Bd21,Bd21-3,Bd30-1,Bd3-1,Koz-3	BdTR12c,Bd1-1
Bd2	53625736	53625850	Bd2TE2702522	Bd21,Bd1-1,Bd21-3,Bd3-1,BdTR12c,Koz-3	Bd30-1
Bd2	54004099	54008115	Bd2TE2694462	Bd21,Bd30-1,Bd3-1,BdTR12c,Koz-3	Bd21-3,Bd1-1
Bd2	54212441	54212484	Bd4TE2681088	Bd1-1	Bd21,Bd21-3,Bd30-1,Bd3-1,BdTR12c,Koz-3
Bd2	54269609	54269702	Bd2TE2705626	Bd21,Bd21-3,Bd3-1,BdTR12c,Koz-3	Bd1-1,Bd30-1
Bd2	54519145	54519234	Bd2TE2706096	Bd21,Bd1-1,Bd30-1,Bd3-1,BdTR12c,Koz-3	Bd21-3
Bd2	54519473	54519560	Bd2TE2723927	Bd21,Bd1-1,Bd30-1,Bd3-1,BdTR12c,Koz-3	Bd21-3
Bd2	54567457	54567528	Bd2TE2724409	Bd21,Bd21-3,Bd30-1,Bd3-1,BdTR12c,Koz-3	Bd1-1
Bd2	54567537	54574789	Bd2TE2708811	Bd21,Bd1-1,Bd21-3,Bd30-1,Bd3-1,Koz-3	BdTR12c
Bd2	54770206	54770280	Bd1TE2747923	Bd1-1	Bd21,Bd21-3,Bd30-1,Bd3-1,BdTR12c,Koz-3
Bd2	54893593	54893637	Bd4TE2685509	Koz-3	Bd21,Bd1-1,Bd21-3,Bd30-1,Bd3-1,BdTR12c
Bd2	55137948	55142208	Bd2TE2694426	Bd21,Bd1-1,Bd30-1,Bd3-1,BdTR12c,Koz-3	Bd21-3
Bd2	55231488	55231531	Bd1TE2767358	Bd1-1	Bd21,Bd21-3,Bd30-1,Bd3-1,BdTR12c,Koz-3
Bd2	55358852	55360194	Bd2TE2713030	Bd21,Bd21-3,Bd30-1,Bd3-1,BdTR12c	Koz-3,Bd1-1
Bd2	55481125	55482194	Bd2TE2713860	Bd21,Bd21-3,Bd30-1,Bd3-1,BdTR12c	Koz-3,Bd1-1
Bd2	55565943	55570534	Bd2TE2694452	Bd21,Bd1-1,Bd30-1,Bd3-1,BdTR12c,Koz-3	Bd21-3
Bd2	55568838	55569361	Bd2TE2696430	Bd21,Bd30-1,Bd3-1,BdTR12c,Koz-3	Bd21-3,Bd1-1
Bd2	56155901	56157946	Bd2TE2714088	Bd21,Bd1-1,Bd21-3,Bd3-1,Koz-3	BdTR12c,Bd30-1
Bd2	56619468	56619614	Bd2TE2722303	Bd21,Bd1-1,Bd30-1,Bd3-1,BdTR12c,Koz-3	Bd21-3
Bd2	56619615	56620510	Bd2TE2714720	Bd21,Bd30-1,Bd3-1,BdTR12c,Koz-3	Bd21-3,Bd1-1
Bd2	56620551	56620755	Bd2TE2720351	Bd21,Bd30-1,Bd3-1,BdTR12c,Koz-3	Bd21-3,Bd1-1
Bd2	56620756	56620874	Bd2TE2723042	Bd21,Bd30-1,Bd3-1,BdTR12c,Koz-3	Bd21-3,Bd1-1
Bd2	57120597	57120673	Bd2TE2724269	Bd21,Bd1-1,Bd30-1,Bd3-1,BdTR12c,Koz-3	Bd21-3
Bd2	57404352	57404457	Bd2TE2703854	Bd21,Bd21-3,Bd30-1,Bd3-1,BdTR12c	Koz-3,Bd1-1
Bd2	57456903	57456951	Bd1TE2748933	Koz-3	Bd21,Bd1-1,Bd21-3,Bd30-1,Bd3-1,BdTR12c
Bd2	57475781	57475824	Bd3TE2717619,Bd3TE2700225	Bd1-1	Bd21,Bd21-3,Bd30-1,Bd3-1,BdTR12c,Koz-3
Bd2	57581333	57586227	Bd2TE2694340	Bd21,Bd21-3,Bd30-1,Bd3-1,BdTR12c,Koz-3	Bd1-1
Bd2	57586228	57586355	Bd2TE2718345	Bd21,Bd21-3,Bd30-1,Bd3-1,BdTR12c,Koz-3	Bd1-1
Bd2	57602154	57602244	Bd1TE2770141	Bd1-1	Bd21,Bd21-3,Bd30-1,Bd3-1,BdTR12c,Koz-3
Bd2	57606525	57606592	Bd2TE2724566	Bd21,Bd1-1,Bd21-3,BdTR12c,Koz-3	Bd3-1,Bd30-1
Bd2	57621313	57621429	Bd2TE2701900	Bd21,Bd1-1,Bd21-3,BdTR12c,Koz-3	Bd3-1,Bd30-1
Bd2	57723396	57723547	Bd2TE2722107	Bd21,Bd1-1,Bd21-3,Bd30-1,Bd3-1	Koz-3,BdTR12c
Bd2	58031298	58031415	Bd2TE2723065	Bd21,Bd21-3,Bd30-1,Bd3-1,BdTR12c,Koz-3	Bd1-1
Bd2	58242667	58242761	Bd5TE2637669	Bd3-1,BdTR12c	Bd21,Bd1-1,Bd21-3,Bd30-1,Koz-3
Bd2	58367597	58370809	Bd2TE2694677	Bd21,Bd21-3,Bd30-1,Bd3-1,BdTR12c,Koz-3	Bd1-1
Bd2	58427777	58427854	Bd2TE2724227	Bd21,Bd30-1,Bd3-1,BdTR12c,Koz-3	Bd21-3,Bd1-1
Bd2	58468126	58468284	Bd2TE2721835	Bd21,Bd30-1,Bd3-1,BdTR12c,Koz-3	Bd21-3,Bd1-1
Bd2	58468146	58468240	Bd2TE2705443	Bd21,Bd30-1,Bd3-1,BdTR12c,Koz-3	Bd21-3,Bd1-1
Bd2	59026689	59028045	Bd2TE2712924	Bd21,Bd1-1,Bd21-3,Bd30-1,Bd3-1,Koz-3	BdTR12c
Bd2	59030597	59032326	Bd2TE2712223	Bd21,Bd21-3,Bd30-1,Bd3-1,BdTR12c,Koz-3	Bd1-1
Bd2	59176501	59176616	Bd2TE2723106	Bd21,Bd30-1,Bd3-1,BdTR12c,Koz-3	Bd21-3,Bd1-1
Bd2	59182862	59183654	Bd2TE2696019	Bd21,Bd21-3,Bd30-1,Bd3-1,BdTR12c,Koz-3	Bd1-1
Bd2	59288325	59288367	Bd3TE2693758	Bd30-1	Bd21,Bd1-1,Bd21-3,Bd3-1,BdTR12c,Koz-3
Bd2	59289277	59289487	Bd2TE2698163	Bd21,Bd1-1,Bd21-3,Bd3-1	Koz-3,BdTR12c,Bd30-1
Bd3	312326	314967	Bd3TE2690553	Bd21,Bd1-1,Bd30-1,Bd3-1,BdTR12c,Koz-3	Bd21-3
Bd3	314839	314889	Bd1TE2749231	Bd1-1	Bd21,Bd21-3,Bd30-1,Bd3-1,BdTR12c,Koz-3
Bd3	344655	344740	Bd3TE2698988	Bd21,Bd21-3,Bd3-1,BdTR12c,Koz-3	Bd1-1,Bd30-1
Bd3	361305	361405	Bd4TE2675486	Koz-3,BdTR12c	Bd21,Bd1-1,Bd21-3,Bd30-1,Bd3-1
Bd3	408300	408370	Bd3TE2720628	Bd21,Bd1-1,Bd30-1,Bd3-1,BdTR12c,Koz-3	Bd21-3
Bd3	408415	409912	Bd3TE2690804	Bd21,Bd1-1,Bd30-1,Bd3-1,BdTR12c,Koz-3	Bd21-3
Bd3	527552	527582	Bd3TE2714612,Bd3TE2693646	BdTR12c	Bd21,Bd1-1,Bd21-3,Bd30-1,Bd3-1,Koz-3
Bd3	527749	527839	Bd3TE2698436	Bd21,Bd1-1,Bd21-3,Bd30-1	Koz-3,Bd3-1,BdTR12c
Bd3	543417	544760	Bd3TE2706324	Bd21,Bd1-1,Bd30-1,Bd3-1,BdTR12c,Koz-3	Bd21-3
Bd3	695596	695638	Bd1TE2750105	Bd1-1	Bd21,Bd21-3,Bd30-1,Bd3-1,BdTR12c,Koz-3
Bd3	791947	791996	Bd2TE2724710	Koz-3,Bd21-3,BdTR12c	Bd21,Bd1-1,Bd30-1,Bd3-1
Bd3	909051	909092	Bd2TE2701935	Koz-3	Bd21,Bd1-1,Bd21-3,Bd30-1,Bd3-1,BdTR12c
Bd3	1134762	1134949	Bd3TE2714528	Bd21,Bd1-1,Bd21-3,Bd3-1,BdTR12c,Koz-3	Bd30-1
Bd3	1367259	1367295	Bd3TE2717597,Bd3TE2700949	Koz-3	Bd21,Bd1-1,Bd21-3,Bd30-1,Bd3-1,BdTR12c
Bd3	1740799	1740915	Bd3TE2694412	Bd21,Bd1-1,Bd30-1,Bd3-1,BdTR12c,Koz-3	Bd21-3
Bd3	1745927	1746113	Bd3TE2692430	Bd21,Bd30-1,Bd3-1,BdTR12c,Koz-3	Bd21-3,Bd1-1
Bd3	1850879	1850976	Bd1TE2777624	Bd1-1	Bd21,Bd21-3,Bd30-1,Bd3-1,BdTR12c,Koz-3
Bd3	2144375	2148608	Bd3TE2690338	Bd21,Bd1-1,Bd30-1,Bd3-1,BdTR12c,Koz-3	Bd21-3
Bd3	2320126	2320205	Bd3TE2712685	Bd1-1	Bd21,Bd21-3,Bd30-1,Bd3-1,BdTR12c,Koz-3
Bd3	2324330	2324446	Bd3TE2694065	Bd21,Bd30-1,Bd3-1,BdTR12c,Koz-3	Bd21-3,Bd1-1
Bd3	2332149	2332249	Bd3TE2696977	Bd21,Bd30-1,Bd3-1,BdTR12c,Koz-3	Bd21-3,Bd1-1
Bd3	2544268	2548203	Bd3TE2690365	Bd21,Bd21-3,Bd30-1	Koz-3,Bd3-1,BdTR12c,Bd1-1
Bd3	2581166	2587094	Bd3TE2690224	Bd21	Koz-3,Bd3-1,BdTR12c,Bd21-3,Bd1-1,Bd30-1
Bd3	2587193	2587301	Bd3TE2696086	Bd21,Bd1-1,Bd30-1,Bd3-1,BdTR12c,Koz-3	Bd21-3
Bd3	2596434	2596491	Bd4TE2676123	BdTR12c	Bd21,Bd1-1,Bd21-3,Bd30-1,Bd3-1,Koz-3
Bd3	2748680	2751910	Bd3TE2703196	Bd21,Bd21-3,Bd3-1,BdTR12c	Koz-3,Bd1-1,Bd30-1
Bd3	2843999	2844285	Bd3TE2712642	Bd21,Bd21-3,Bd30-1,Bd3-1,BdTR12c,Koz-3	Bd1-1
Bd3	2844286	2845533	Bd3TE2706757	Bd21,Bd21-3,Bd30-1,Bd3-1,BdTR12c,Koz-3	Bd1-1
Bd3	2874666	2875675	Bd3TE2707534	Bd21	Koz-3,Bd3-1,BdTR12c,Bd21-3,Bd1-1,Bd30-1
Bd3	2912861	2913455	Bd3TE2691258	Bd21,Bd30-1,Bd3-1,BdTR12c,Koz-3	Bd21-3,Bd1-1
Bd3	2917276	2917398	Bd3TE2693337	Bd21,Bd21-3,Bd30-1,Bd3-1,BdTR12c,Koz-3	Bd1-1
Bd3	2945371	2945481	Bd3TE2695790	Bd21,Bd3-1,BdTR12c,Koz-3	Bd21-3,Bd1-1,Bd30-1
Bd3	2947399	2947489	Bd3TE2698482	Bd21,Bd3-1,BdTR12c,Koz-3	Bd21-3,Bd1-1,Bd30-1
Bd3	3006873	3007060	Bd3TE2714512	Bd21,Bd1-1,Bd21-3,Bd3-1,BdTR12c,Koz-3	Bd30-1
Bd3	3006933	3007054	Bd3TE2693395	Bd21,Bd1-1,Bd21-3,Bd3-1,BdTR12c,Koz-3	Bd30-1
Bd3	3015707	3018547	Bd3TE2703683	Bd21,Bd1-1	Koz-3,Bd3-1,Bd21-3,BdTR12c,Bd30-1
Bd3	3089587	3091349	Bd3TE2690729	Bd21,Bd1-1,Bd30-1,Bd3-1,BdTR12c,Koz-3	Bd21-3
Bd3	3104829	3105513	Bd3TE2709344	Bd21,Bd1-1,Bd30-1,Bd3-1,BdTR12c,Koz-3	Bd21-3
Bd3	3294199	3298334	Bd3TE2690343	Bd21,Bd1-1,Bd30-1,Bd3-1,BdTR12c,Koz-3	Bd21-3
Bd3	3301038	3301097	Bd3TE2690343	Bd1-1	Bd21,Bd21-3,Bd30-1,Bd3-1,BdTR12c,Koz-3
Bd3	3397028	3397120	Bd3TE2719230	Bd21,Bd30-1,Bd3-1,BdTR12c,Koz-3	Bd21-3,Bd1-1
Bd3	3487464	3492083	Bd3TE2702204	Bd21,Bd1-1,Bd30-1,Bd3-1,BdTR12c,Koz-3	Bd21-3
Bd3	3526684	3526774	Bd4TE2686436	BdTR12c,Bd30-1	Bd21,Bd1-1,Bd21-3,Bd3-1,Koz-3
Bd3	3707356	3712104	Bd3TE2690304	Bd21,Bd1-1,Bd30-1,Bd3-1,BdTR12c,Koz-3	Bd21-3
Bd3	3795258	3796124	Bd3TE2691079	Bd21,Bd1-1	Koz-3,Bd3-1,Bd21-3,BdTR12c,Bd30-1
Bd3	4527309	4527341	Bd2TE2709966,Bd2TE2693826	Bd21-3	Bd21,Bd1-1,Bd30-1,Bd3-1,BdTR12c,Koz-3
Bd3	4569237	4569804	Bd3TE2709982	Bd21,Bd1-1,Bd30-1,Bd3-1,BdTR12c,Koz-3	Bd21-3
Bd3	4849461	4850171	Bd3TE2709186	Bd21,Bd30-1,Bd3-1,BdTR12c,Koz-3	Bd21-3,Bd1-1
Bd3	4850464	4851544	Bd3TE2707229	Bd21,Bd30-1,Bd3-1,BdTR12c,Koz-3	Bd21-3,Bd1-1
Bd3	4851545	4851620	Bd3TE2720318	Bd21,Bd30-1,Bd3-1,BdTR12c,Koz-3	Bd21-3,Bd1-1
Bd3	4851621	4851751	Bd3TE2717102	Bd21,Bd30-1,Bd3-1,BdTR12c,Koz-3	Bd21-3,Bd1-1
Bd3	4851752	4851959	Bd3TE2713997	Bd21,Bd30-1,Bd3-1,BdTR12c,Koz-3	Bd21-3,Bd1-1
Bd3	4887884	4888010	Bd3TE2693223	Bd21,Bd21-3,Bd30-1,Bd3-1,BdTR12c,Koz-3	Bd1-1
Bd3	5008501	5013345	Bd3TE2690295	Bd21,Bd1-1,Bd30-1,Bd3-1,BdTR12c,Koz-3	Bd21-3
Bd3	5027055	5031384	Bd3TE2710530	Bd21,Bd1-1,Bd30-1,Bd3-1,BdTR12c,Koz-3	Bd21-3
Bd3	5027698	5030972	Bd3TE2703125	Bd21,Bd30-1,Bd3-1,BdTR12c,Koz-3	Bd21-3,Bd1-1
Bd3	5193915	5199021	Bd3TE2690274	Bd21,Bd1-1,Bd30-1,Bd3-1,BdTR12c,Koz-3	Bd21-3
Bd3	5273517	5273562	Bd5TE2646057	Bd21-3	Bd21,Bd1-1,Bd30-1,Bd3-1,BdTR12c,Koz-3
Bd3	5394122	5394227	Bd3TE2696363	Bd21,Bd21-3,Bd30-1,Bd3-1,BdTR12c,Koz-3	Bd1-1
Bd3	5423427	5423492	Bd3TE2690606	Bd1-1	Bd21,Bd21-3,Bd30-1,Bd3-1,BdTR12c,Koz-3
Bd3	5457777	5457891	Bd3TE2695027	Bd21,Bd30-1,Bd3-1,BdTR12c,Koz-3	Bd21-3,Bd1-1
Bd3	5494006	5494918	Bd3TE2708036	Bd21,Bd1-1,Bd30-1,Bd3-1,BdTR12c,Koz-3	Bd21-3
Bd3	5497659	5499372	Bd3TE2705386	Bd21,Bd3-1,BdTR12c,Koz-3	Bd21-3,Bd1-1,Bd30-1
Bd3	5533470	5536075	Bd3TE2690562	Bd21,Bd30-1,Bd3-1,BdTR12c,Koz-3	Bd21-3,Bd1-1
Bd3	5542206	5542302	Bd3TE2690339	Bd21-3,Bd1-1	Bd21,Bd30-1,Bd3-1,BdTR12c,Koz-3
Bd3	5572561	5575784	Bd3TE2690467	Bd21,Bd21-3,Bd30-1,Bd3-1,BdTR12c,Koz-3	Bd1-1
Bd3	5729895	5735815	Bd3TE2690225	Bd21,Bd21-3,Bd3-1,BdTR12c,Koz-3	Bd1-1,Bd30-1
Bd3	5966079	5966118	Bd3TE2718854	Bd1-1	Bd21,Bd21-3,Bd30-1,Bd3-1,BdTR12c,Koz-3
Bd3	5977467	5978027	Bd3TE2709960	Bd21,Bd1-1,Bd21-3,Bd30-1,Bd3-1,BdTR12c	Koz-3
Bd3	6510900	6514200	Bd3TE2703086	Bd21,Bd1-1,Bd21-3,Bd3-1,BdTR12c	Koz-3,Bd30-1
Bd3	6783542	6783876	Bd3TE2691531	Bd21,Bd1-1,Bd21-3,Bd30-1,BdTR12c,Koz-3	Bd3-1
Bd3	6829113	6829152	Bd3TE2699981	BdTR12c	Bd21,Bd1-1,Bd21-3,Bd30-1,Bd3-1,Koz-3
Bd3	6985968	6986181	Bd3TE2713854	Bd21,Bd1-1,Bd21-3,Bd3-1,BdTR12c,Koz-3	Bd30-1
Bd3	7219270	7222901	Bd3TE2690395	Bd21,Bd30-1,Bd3-1,BdTR12c,Koz-3	Bd21-3,Bd1-1
Bd3	7229532	7229615	Bd3TE2690395	Bd1-1	Bd21,Bd21-3,Bd30-1,Bd3-1,BdTR12c,Koz-3
Bd3	7229885	7229986	Bd3TE2690395	Bd1-1	Bd21,Bd21-3,Bd30-1,Bd3-1,BdTR12c,Koz-3
Bd3	7257857	7261878	Bd3TE2690357	Bd21,Bd1-1,Bd30-1,Bd3-1,BdTR12c,Koz-3	Bd21-3
Bd3	7261879	7262826	Bd3TE2711811	Bd21,Bd1-1,Bd30-1,Bd3-1,BdTR12c,Koz-3	Bd21-3
Bd3	7312119	7313815	Bd3TE2705448	Bd21	Koz-3,Bd3-1,BdTR12c,Bd21-3,Bd1-1,Bd30-1
Bd3	7322736	7322867	Bd3TE2716982	Bd21,Bd21-3,Bd30-1,Bd3-1,BdTR12c,Koz-3	Bd1-1
Bd3	7466261	7466309	Bd3TE2702517	Bd30-1	Bd21,Bd1-1,Bd21-3,Bd3-1,BdTR12c,Koz-3
Bd3	7477388	7477529	Bd3TE2715962	Bd21,Bd21-3,Bd30-1,Bd3-1,BdTR12c,Koz-3	Bd1-1
Bd3	7477530	7477649	Bd3TE2693475	Bd21,Bd21-3,Bd30-1,Bd3-1,BdTR12c,Koz-3	Bd1-1
Bd3	7565983	7568628	Bd3TE2703907	Bd21,Bd21-3,Bd30-1,Bd3-1,BdTR12c,Koz-3	Bd1-1
Bd3	7568629	7571940	Bd3TE2703053	Bd21,Bd21-3,Bd30-1,Bd3-1,BdTR12c,Koz-3	Bd1-1
Bd3	7776928	7778335	Bd3TE2707506	Bd21,Bd21-3,Bd30-1,Bd3-1,BdTR12c,Koz-3	Bd1-1
Bd3	7777489	7777884	Bd3TE2711514	Bd21,Bd21-3,Bd30-1,Bd3-1,BdTR12c,Koz-3	Bd1-1
Bd3	7915157	7915203	Bd4TE2678875	Bd1-1	Bd21,Bd21-3,Bd30-1,Bd3-1,BdTR12c,Koz-3
Bd3	7998421	7999316	Bd3TE2708149	Bd21,Bd1-1,Bd30-1,Bd3-1,BdTR12c,Koz-3	Bd21-3
Bd3	8024142	8024250	Bd3TE2696080	Bd21,Bd1-1,Bd30-1,Bd3-1,BdTR12c,Koz-3	Bd21-3
Bd3	8024251	8029473	Bd3TE2690262	Bd21,Bd1-1,Bd30-1,Bd3-1,BdTR12c,Koz-3	Bd21-3
Bd3	8072530	8073870	Bd3TE2706348	Bd21,Bd30-1,Bd3-1,BdTR12c,Koz-3	Bd21-3,Bd1-1
Bd3	8300427	8300471	Bd3TE2709076	Bd1-1	Bd21,Bd21-3,Bd30-1,Bd3-1,BdTR12c,Koz-3
Bd3	8343967	8344094	Bd3TE2693175	Bd21,Bd1-1,Bd21-3,Bd30-1,BdTR12c,Koz-3	Bd3-1
Bd3	8399908	8401268	Bd3TE2706215	Bd21,Bd21-3,Bd30-1,BdTR12c,Koz-3	Bd3-1,Bd1-1
Bd3	8419648	8423309	Bd3TE2702746	Bd21,Bd21-3,Bd30-1,Bd3-1,BdTR12c,Koz-3	Bd1-1
Bd3	8497058	8497153	Bd3TE2697699	Bd21,Bd21-3,Bd30-1,BdTR12c,Koz-3	Bd3-1,Bd1-1
Bd3	8682870	8685404	Bd3TE2690570	Bd21,Bd1-1,Bd30-1,Bd3-1,BdTR12c,Koz-3	Bd21-3
Bd3	8685405	8698783	Bd3TE2690059	Bd21,Bd1-1,Bd30-1,Bd3-1,BdTR12c,Koz-3	Bd21-3
Bd3	8700883	8701050	Bd3TE2692654	Bd21,Bd1-1,Bd30-1,Bd3-1,BdTR12c,Koz-3	Bd21-3
Bd3	8746130	8747389	Bd3TE2706718	Bd21,Bd21-3,Bd30-1,Bd3-1,BdTR12c	Koz-3,Bd1-1
Bd3	8755907	8759557	Bd3TE2690392	Bd21,Bd1-1,Bd30-1,Bd3-1,BdTR12c,Koz-3	Bd21-3
Bd3	8779642	8784018	Bd3TE2690327	Bd21,Bd1-1,Bd30-1,Bd3-1,BdTR12c,Koz-3	Bd21-3
Bd3	8872039	8873678	Bd3TE2705581	Bd21,Bd1-1,Bd21-3,Bd3-1,BdTR12c,Koz-3	Bd30-1
Bd3	9335579	9336932	Bd3TE2706258	Bd21,Bd30-1,Bd3-1,BdTR12c,Koz-3	Bd21-3,Bd1-1
Bd3	9606530	9608811	Bd3TE2690608	Bd21,Bd1-1,Bd30-1,Bd3-1,BdTR12c,Koz-3	Bd21-3
Bd3	9613313	9613389	Bd3TE2699957	Bd21,Bd1-1,Bd30-1,Bd3-1,BdTR12c,Koz-3	Bd21-3
Bd3	9791300	9791931	Bd3TE2709626	Bd21,Bd21-3,Bd30-1,Bd3-1,BdTR12c,Koz-3	Bd1-1
Bd3	9914066	9917431	Bd3TE2702952	Bd21,Bd21-3,Bd30-1,Bd3-1,BdTR12c,Koz-3	Bd1-1
Bd3	9962219	9963524	Bd3TE2706558	Bd21,Bd30-1,Bd3-1,BdTR12c,Koz-3	Bd21-3,Bd1-1
Bd3	9977640	9979338	Bd3TE2705438	Bd21,Bd1-1,Bd21-3,Bd3-1,BdTR12c,Koz-3	Bd30-1
Bd3	10091225	10091400	Bd3TE2714934	Bd21,Bd21-3,Bd30-1,Bd3-1,BdTR12c,Koz-3	Bd1-1
Bd3	10122138	10122227	Bd2TE2694334	Bd30-1	Bd21,Bd1-1,Bd21-3,Bd3-1,BdTR12c,Koz-3
Bd3	10242128	10243308	Bd3TE2706961	Bd21,Bd30-1,Bd3-1,BdTR12c,Koz-3	Bd21-3,Bd1-1
Bd3	10243309	10253160	Bd3TE2690121	Bd21,Bd21-3,Bd30-1,Bd3-1,BdTR12c,Koz-3	Bd1-1
Bd3	10253207	10253743	Bd3TE2710177	Bd21,Bd21-3,Bd30-1,Bd3-1,BdTR12c,Koz-3	Bd1-1
Bd3	10253745	10254997	Bd3TE2706745	Bd21,Bd21-3,Bd30-1,Bd3-1,BdTR12c,Koz-3	Bd1-1
Bd3	10254998	10257668	Bd3TE2703879	Bd21,Bd21-3,Bd30-1,Bd3-1,BdTR12c,Koz-3	Bd1-1
Bd3	10269228	10269328	Bd2TE2712229	Bd1-1	Bd21,Bd21-3,Bd30-1,Bd3-1,BdTR12c,Koz-3
Bd3	10305837	10306934	Bd3TE2707182	Bd21,Bd21-3,Bd30-1,Bd3-1,BdTR12c,Koz-3	Bd1-1
Bd3	10356350	10358201	Bd3TE2705079	Bd21,Bd1-1,Bd21-3,Bd3-1	Koz-3,BdTR12c,Bd30-1
Bd3	10430267	10431827	Bd3TE2705723	Bd21,Bd1-1,Bd30-1,Bd3-1,BdTR12c,Koz-3	Bd21-3
Bd3	10434874	10436554	Bd3TE2705494	Bd21,Bd21-3,Bd3-1,BdTR12c,Koz-3	Bd1-1,Bd30-1
Bd3	10437379	10437732	Bd3TE2711920	Bd21,Bd30-1,Bd3-1,BdTR12c,Koz-3	Bd21-3,Bd1-1
Bd3	10456948	10460981	Bd3TE2702527	Bd21,Bd21-3,Bd30-1,Bd3-1,BdTR12c,Koz-3	Bd1-1
Bd3	10512341	10514180	Bd3TE2705101	Bd21,Bd30-1,Bd3-1,Koz-3	Bd21-3,Bd1-1,BdTR12c
Bd3	10514181	10515145	Bd3TE2707729	Bd21,Bd30-1,Bd3-1,Koz-3	Bd21-3,Bd1-1,BdTR12c
Bd3	10515146	10517213	Bd3TE2704733	Bd21,Bd30-1,Bd3-1,Koz-3	Bd21-3,Bd1-1,BdTR12c
Bd3	10517214	10517424	Bd3TE2713916	Bd21,Bd30-1,Bd3-1,Koz-3	Bd21-3,Bd1-1,BdTR12c
Bd3	10517425	10517677	Bd3TE2713160	Bd21,Bd30-1,Bd3-1,Koz-3	Bd21-3,Bd1-1,BdTR12c
Bd3	10517678	10524612	Bd3TE2701456	Bd21,Bd1-1,Bd21-3,Bd30-1,Bd3-1,Koz-3	BdTR12c
Bd3	10524613	10529252	Bd3TE2702196	Bd21,Bd21-3,Bd30-1,Bd3-1,BdTR12c,Koz-3	Bd1-1
Bd3	10566600	10566682	Bd3TE2719904	Bd21,Bd1-1,Bd21-3,Bd30-1,Bd3-1,BdTR12c	Koz-3
Bd3	10581497	10584654	Bd3TE2703313	Bd21,Bd21-3,Bd30-1,Bd3-1,BdTR12c,Koz-3	Bd1-1
Bd3	10612545	10612617	Bd3TE2720530	Bd21,Bd21-3,Bd30-1,Bd3-1,BdTR12c,Koz-3	Bd1-1
Bd3	10675772	10675806	Bd2TE2694025,Bd2TE2710608	Bd1-1	Bd21,Bd21-3,Bd30-1,Bd3-1,BdTR12c,Koz-3
Bd3	10745949	10746106	Bd3TE2715702	Bd21,Bd21-3,Bd30-1,Bd3-1,BdTR12c,Koz-3	Bd1-1
Bd3	10796669	10802494	Bd3TE2701715	Bd21,Bd1-1,Bd21-3,Bd30-1,Bd3-1	Koz-3,BdTR12c
Bd3	10829498	10830673	Bd3TE2706981	Bd21,Bd21-3,Bd30-1,Bd3-1,BdTR12c,Koz-3	Bd1-1
Bd3	10830674	10830793	Bd3TE2717723	Bd21,Bd21-3,Bd30-1,Bd3-1,BdTR12c,Koz-3	Bd1-1
Bd3	10875945	10878216	Bd3TE2704419	Bd21,Bd21-3,Bd30-1,Bd3-1,BdTR12c,Koz-3	Bd1-1
Bd3	10878217	10881413	Bd3TE2703252	Bd21,Bd21-3,Bd30-1,Bd3-1,BdTR12c,Koz-3	Bd1-1
Bd3	10881414	10886996	Bd3TE2701792	Bd21,Bd21-3,Bd30-1,Bd3-1,BdTR12c,Koz-3	Bd1-1
Bd3	10887033	10887220	Bd3TE2714530	Bd21,Bd21-3,Bd3-1	Koz-3,BdTR12c,Bd1-1,Bd30-1
Bd3	10887221	10888744	Bd3TE2705821	Bd21,Bd21-3,Bd3-1	Koz-3,BdTR12c,Bd1-1,Bd30-1
Bd3	10888745	10889138	Bd3TE2711524	Bd21,Bd3-1	Koz-3,Bd21-3,Bd1-1,BdTR12c,Bd30-1
Bd3	10889141	10892471	Bd3TE2703009	Bd21,Bd21-3,Bd30-1,Bd3-1,BdTR12c,Koz-3	Bd1-1
Bd3	10994993	10995504	Bd3TE2710435	Bd21,Bd21-3,Bd30-1,Bd3-1,BdTR12c,Koz-3	Bd1-1
Bd3	10995841	10999225	Bd3TE2702925	Bd21,Bd21-3,Bd30-1,Bd3-1,BdTR12c,Koz-3	Bd1-1
Bd3	11014142	11014664	Bd3TE2710320	Bd21,Bd1-1,Bd30-1,Bd3-1,BdTR12c	Koz-3,Bd21-3
Bd3	11073820	11074709	Bd3TE2708367	Bd21,Bd21-3,Bd30-1,Bd3-1,BdTR12c,Koz-3	Bd1-1
Bd3	11075092	11076410	Bd3TE2706496	Bd21,Bd21-3,Bd30-1,Bd3-1,BdTR12c,Koz-3	Bd1-1
Bd3	11090132	11090891	Bd3TE2708947	Bd21,Bd21-3,Bd30-1,Bd3-1,BdTR12c,Koz-3	Bd1-1
Bd3	11090892	11091890	Bd3TE2707586	Bd21,Bd21-3,Bd30-1,Bd3-1,BdTR12c,Koz-3	Bd1-1
Bd3	11589374	11590038	Bd3TE2709445	Bd21,Bd1-1,Bd30-1,Bd3-1,BdTR12c,Koz-3	Bd21-3
Bd3	12005768	12006687	Bd3TE2707994	Bd21,Bd1-1,Bd21-3,Bd30-1,Bd3-1	Koz-3,BdTR12c
Bd3	12024609	12024722	Bd3TE2695238	Bd21,Bd21-3,Bd30-1,Bd3-1,BdTR12c,Koz-3	Bd1-1
Bd3	12520244	12523742	Bd3TE2690425	Bd21,Bd30-1,Bd3-1,BdTR12c,Koz-3	Bd21-3,Bd1-1
Bd3	12653629	12655388	Bd3TE2705253	Bd21,Bd1-1,Bd21-3,Bd3-1,BdTR12c,Koz-3	Bd30-1
Bd3	13007300	13007458	Bd3TE2715637	Bd21,Bd21-3,Bd30-1,Bd3-1,BdTR12c,Koz-3	Bd1-1
Bd3	13010224	13011360	Bd3TE2690951	Bd21,Bd21-3,Bd30-1,Bd3-1,BdTR12c,Koz-3	Bd1-1
Bd3	13013078	13013684	Bd3TE2709777	Bd21,Bd21-3,Bd30-1,Bd3-1,BdTR12c,Koz-3	Bd1-1
Bd3	13115719	13116071	Bd3TE2711935	Bd21,Bd1-1,Bd30-1,Bd3-1,BdTR12c,Koz-3	Bd21-3
Bd3	13116157	13119228	Bd3TE2690497	Bd21,Bd1-1,Bd30-1,Bd3-1,BdTR12c,Koz-3	Bd21-3
Bd3	13362256	13363283	Bd3TE2707415	Bd21,Bd21-3,Bd30-1,Bd3-1,BdTR12c,Koz-3	Bd1-1
Bd3	13369363	13369411	Bd4TE2679028	Koz-3	Bd21,Bd1-1,Bd21-3,Bd30-1,Bd3-1,BdTR12c
Bd3	13405093	13406542	Bd3TE2690823	Bd21,Bd21-3,Bd30-1,Bd3-1,BdTR12c,Koz-3	Bd1-1
Bd3	13632862	13636063	Bd3TE2690474	Bd21,Bd1-1,Bd30-1,Bd3-1,BdTR12c,Koz-3	Bd21-3
Bd3	13669364	13672656	Bd3TE2703100	Bd21,Bd21-3,Bd30-1,Bd3-1,BdTR12c,Koz-3	Bd1-1
Bd3	13688074	13689402	Bd3TE2706392	Bd21,Bd30-1,Bd3-1	Koz-3,Bd21-3,Bd1-1,BdTR12c
Bd3	13697059	13699077	Bd3TE2690663	Bd21,Bd1-1,Bd30-1,Bd3-1,BdTR12c,Koz-3	Bd21-3
Bd3	13926497	13927838	Bd3TE2706344	Bd21,Bd21-3,Bd30-1,Bd3-1,BdTR12c	Koz-3,Bd1-1
Bd3	13992899	13993012	Bd3TE2695313	Bd21,Bd1-1,Bd30-1,Bd3-1,BdTR12c,Koz-3	Bd21-3
Bd3	13997147	13997245	Bd3TE2697235	Bd21,Bd1-1,Bd30-1,Bd3-1,BdTR12c,Koz-3	Bd21-3
Bd3	13997276	13997503	Bd3TE2692052	Bd21,Bd1-1,Bd30-1,Bd3-1,BdTR12c,Koz-3	Bd21-3
Bd3	13997504	14001407	Bd3TE2702593	Bd21,Bd1-1,Bd30-1,Bd3-1,BdTR12c,Koz-3	Bd21-3
Bd3	14001408	14001624	Bd3TE2692160	Bd21,Bd1-1,Bd30-1,Bd3-1,BdTR12c,Koz-3	Bd21-3
Bd3	14032665	14032751	Bd3TE2698828	Bd21,Bd1-1,Bd21-3,Bd3-1,BdTR12c,Koz-3	Bd30-1
Bd3	14068418	14072766	Bd3TE2690333	Bd21,Bd30-1,Bd3-1,BdTR12c,Koz-3	Bd21-3,Bd1-1
Bd3	14078487	14081797	Bd3TE2703061	Bd21,Bd21-3,Bd30-1,Bd3-1,BdTR12c,Koz-3	Bd1-1
Bd3	14162670	14162750	Bd2TE2701966	Koz-3,Bd3-1,Bd21-3	Bd21,Bd1-1,Bd30-1,BdTR12c
Bd3	14209487	14213859	Bd3TE2702464	Bd21,Bd1-1,Bd30-1,Bd3-1,BdTR12c,Koz-3	Bd21-3
Bd3	14347144	14350451	Bd3TE2703069	Bd21,Bd1-1,Bd3-1	Koz-3,Bd21-3,BdTR12c,Bd30-1
Bd3	14455906	14456022	Bd3TE2693731	Bd21,Bd1-1,Bd30-1,Bd3-1,BdTR12c,Koz-3	Bd21-3
Bd3	14456360	14456473	Bd3TE2695275	Bd21,Bd30-1,Bd3-1,BdTR12c,Koz-3	Bd21-3,Bd1-1
Bd3	14463976	14464100	Bd3TE2717492	Bd21,Bd30-1,Bd3-1,BdTR12c,Koz-3	Bd21-3,Bd1-1
Bd3	14463981	14464051	Bd3TE2700275	Bd21,Bd30-1,Bd3-1,BdTR12c,Koz-3	Bd21-3,Bd1-1
Bd3	14586994	14590281	Bd3TE2690457	Bd21,Bd21-3,Bd30-1,Bd3-1,BdTR12c,Koz-3	Bd1-1
Bd3	14723755	14723823	Bd2TE2720102	Bd1-1	Bd21,Bd21-3,Bd30-1,Bd3-1,BdTR12c,Koz-3
Bd3	14781471	14781559	Bd4TE2673280	Bd3-1	Bd21,Bd1-1,Bd21-3,Bd30-1,BdTR12c,Koz-3
Bd3	14880356	14881684	Bd3TE2706416	Bd21	Koz-3,Bd3-1,BdTR12c,Bd21-3,Bd1-1,Bd30-1
Bd3	14887674	14887759	Bd3TE2698926	Bd21	Koz-3,Bd3-1,BdTR12c,Bd21-3,Bd1-1,Bd30-1
Bd3	14910564	14910658	Bd2TE2698529	Bd30-1	Bd21,Bd1-1,Bd21-3,Bd3-1,BdTR12c,Koz-3
Bd3	14955860	14955899	Bd4TE2685741	BdTR12c	Bd21,Bd1-1,Bd21-3,Bd30-1,Bd3-1,Koz-3
Bd3	14959151	14959190	Bd3TE2716878	Koz-3,BdTR12c,Bd30-1	Bd21,Bd1-1,Bd21-3,Bd3-1
Bd3	14981799	14981918	Bd3TE2693460	Bd21,Bd1-1,Bd3-1	Koz-3,Bd21-3,BdTR12c,Bd30-1
Bd3	14982404	14982461	Bd2TE2723382	BdTR12c	Bd21,Bd1-1,Bd21-3,Bd30-1,Bd3-1,Koz-3
Bd3	15026581	15026664	Bd1TE2748279	Koz-3	Bd21,Bd1-1,Bd21-3,Bd30-1,Bd3-1,BdTR12c
Bd3	15173505	15174234	Bd3TE2709089	Bd21,Bd21-3,Bd30-1,Bd3-1,BdTR12c,Koz-3	Bd1-1
Bd3	15182882	15183029	Bd3TE2690671	Bd1-1	Bd21,Bd21-3,Bd30-1,Bd3-1,BdTR12c,Koz-3
Bd3	15278734	15292842	Bd3TE2701676	Bd21,Bd21-3,Bd30-1,Bd3-1,BdTR12c,Koz-3	Bd1-1
Bd3	15281520	15284157	Bd3TE2703919	Bd21,Bd21-3,Bd30-1,Bd3-1,BdTR12c,Koz-3	Bd1-1
Bd3	15284159	15287289	Bd3TE2703353	Bd21,Bd30-1,Bd3-1,BdTR12c,Koz-3	Bd21-3,Bd1-1
Bd3	15287461	15288142	Bd3TE2691205	Bd21,Bd21-3,Bd30-1,Bd3-1,BdTR12c,Koz-3	Bd1-1
Bd3	15289609	15289722	Bd3TE2718083	Bd21,Bd21-3,Bd30-1,Bd3-1,BdTR12c,Koz-3	Bd1-1
Bd3	15350957	15356260	Bd3TE2690255	Bd21,Bd21-3,Bd30-1,Bd3-1,BdTR12c,Koz-3	Bd1-1
Bd3	15376684	15377652	Bd3TE2707696	Bd21,Bd1-1,Bd21-3,Bd30-1,Bd3-1,Koz-3	BdTR12c
Bd3	15385753	15389895	Bd3TE2702466	Bd21,Bd21-3,Bd30-1,Bd3-1,BdTR12c,Koz-3	Bd1-1
Bd3	15452790	15454472	Bd3TE2705490	Bd21,Bd21-3,Bd30-1,Bd3-1,BdTR12c,Koz-3	Bd1-1
Bd3	15462933	15463888	Bd3TE2708114	Bd21,Bd21-3,Bd30-1,Bd3-1,BdTR12c,Koz-3	Bd1-1
Bd3	15617208	15617486	Bd3TE2712178	Bd21,Bd21-3,Bd30-1,Bd3-1,BdTR12c,Koz-3	Bd1-1
Bd3	15617483	15617532	Bd1TE2766629,Bd1TE2747567	Bd30-1	Bd21,Bd1-1,Bd21-3,Bd3-1,BdTR12c,Koz-3
Bd3	15617487	15630329	Bd3TE2701069	Bd21,Bd21-3,Bd30-1,Bd3-1,BdTR12c,Koz-3	Bd1-1
[truncated: 2,021 more rows]
