# Supplementary material for: DNA methylation profiles of diverse Brachypodium distachyon align with underlying genetic diversity
Source: Genome Res. 2016 Nov;26(11):1520–31. doi: 10.1101/gr.205468.116 (PMC5088594; doi:10.1101/gr.205468.116)
Supplement: Supplemental Material [file supp_gr.205468.116_Supplemental_Table_8.xlsx]

## Sheet: Sheet1
Supplemental Table 8: Bisulfite sequencing summary statistics for other plant species
Species	Genotype	Proportion Repeats	Raw reads	QC reads	Mapping Efficency (%)	CG methylation (%)	CHG methylation (%)	CHH methylation (%)	Sequence Reference
Arabidopsis thaliana	Col-0	23.7	144409782	126653050	56.6	24	9.5	3.6	Lister et al., 2008
Oryza sativa var. Nipponbare	NPB	26	473639980	21239118	72.9	32.4	15.8	3.6	Chodavarapu et al., 2012
Oryza sativa var. Indica	93-11	26	332703207	255950488	66.4	37.4	17.5	3.7	Chodavarapu et al., 2012
Zea mays	B73	85	335525764	332041150	60.8	86.9	72.9	1.9	Eichten et al., 2013
