# Supplementary material for: DNA methylation profiles of diverse Brachypodium distachyon align with underlying genetic diversity
Source: HighWire-hosted journal article supplement (doi:10.1101/gr.205468.116), 2016-09-09
Supplement: Supplemental_Fig_S3.pdf [file Supplemental_Fig_S3.pdf]

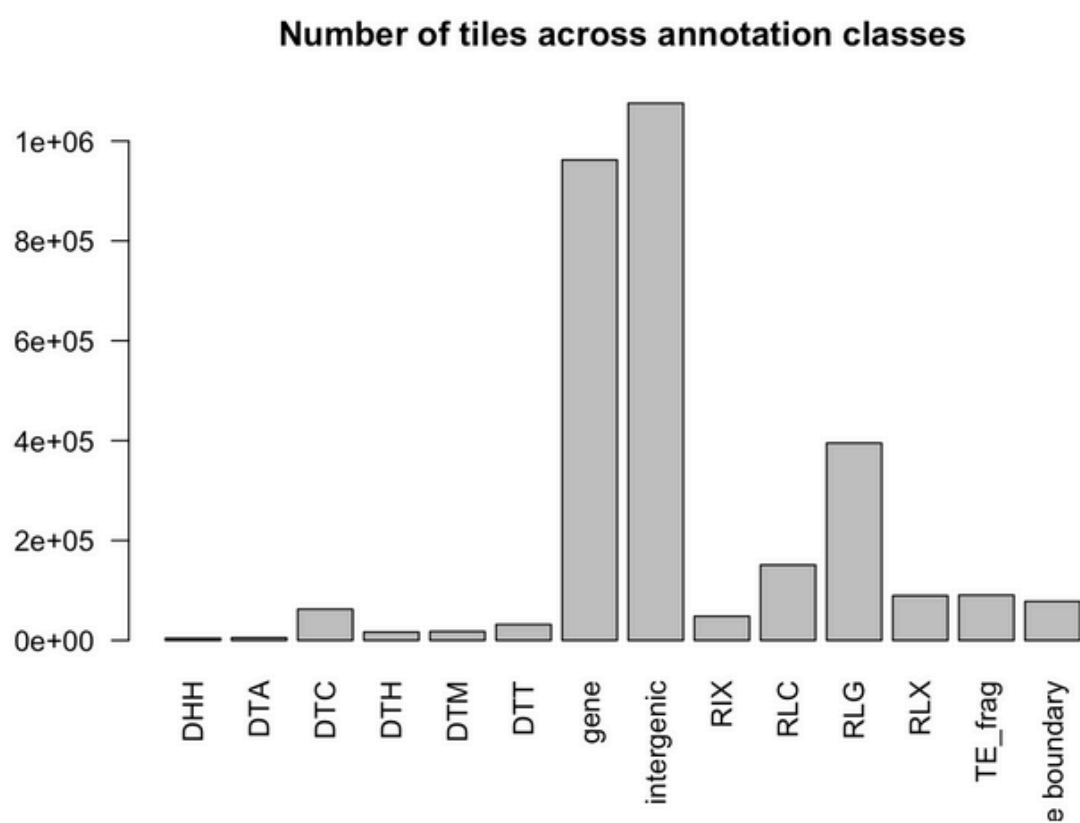

**Supplemental Figure 3:** Number of genomic tiles intersecting with annotation features
