# Supplementary material for: DNA methylation profiles of diverse Brachypodium distachyon align with underlying genetic diversity
Source: HighWire-hosted journal article supplement (doi:10.1101/gr.205468.116), 2016-09-09
Supplement: Supplemental_Fig_S4.pdf [file Supplemental_Fig_S4.pdf]

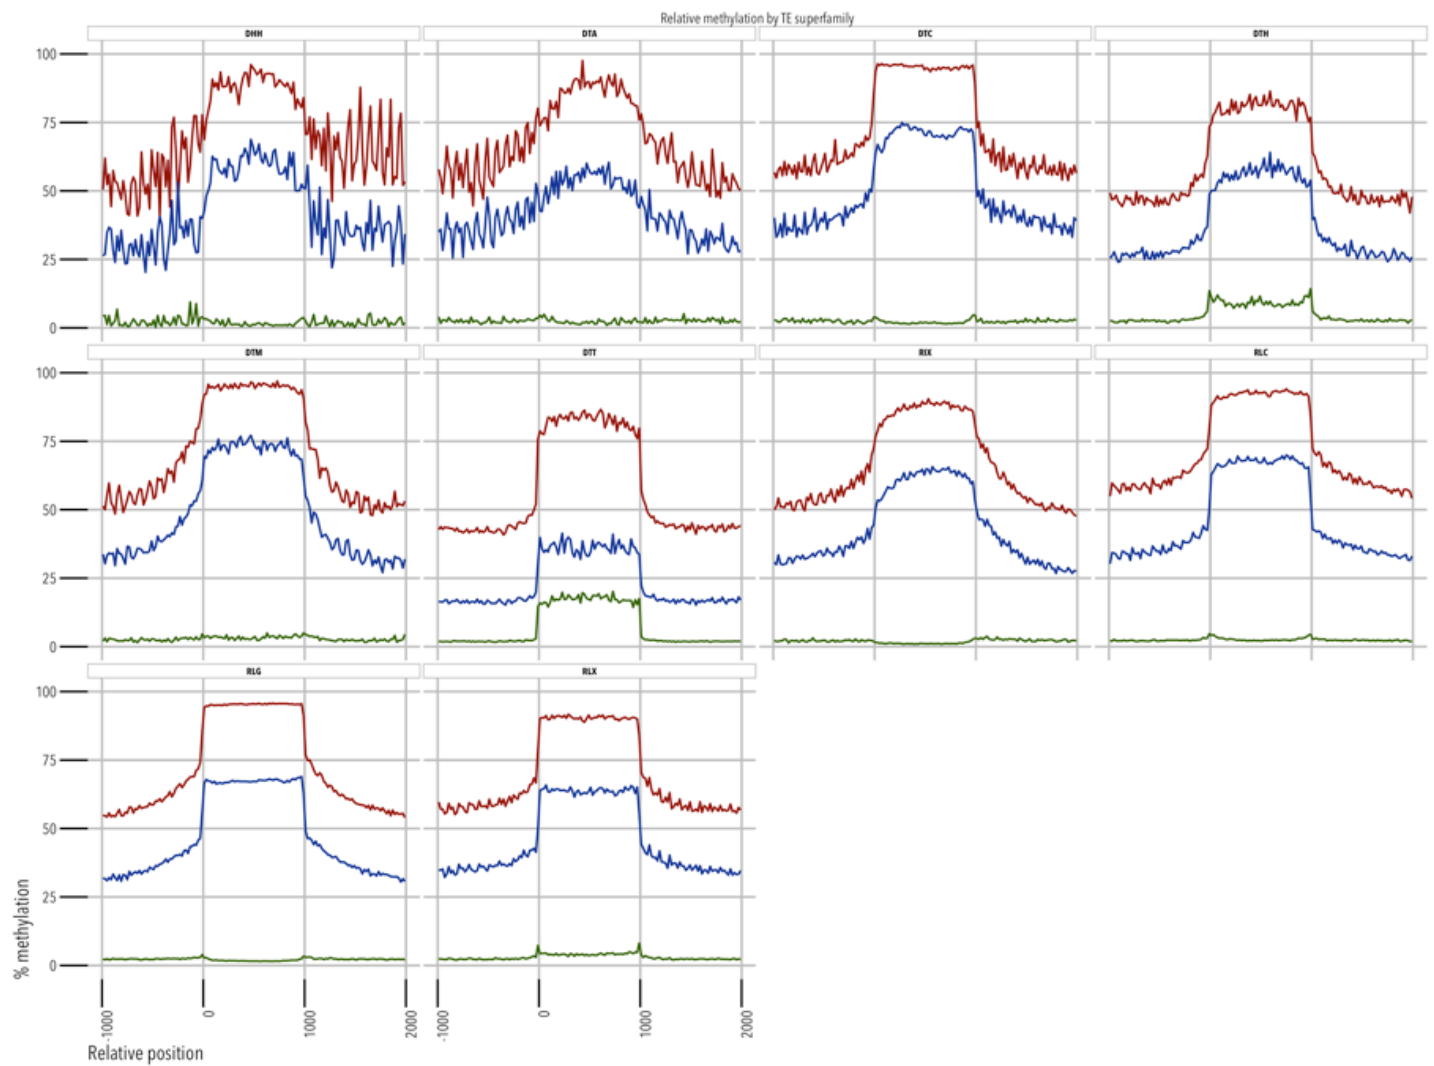

**Supplemental Figure 4:** Relative distance plots of average methylation for ten *B. distachyon* annotated transposon superfamilies. Methylation is shown in CG (red), CHG (blue), and CHH (green) contexts.
