# Supplementary material for: DNA methylation profiles of diverse Brachypodium distachyon align with underlying genetic diversity
Source: HighWire-hosted journal article supplement (doi:10.1101/gr.205468.116), 2016-09-09
Supplement: Supplemental_Fig_S15.pdf [file Supplemental_Fig_S15.pdf]

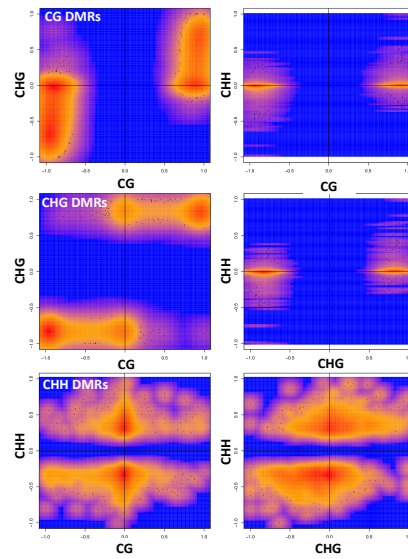

**Supplemental Figure 15.** Scatter plots of methylation states across CG, CHG, and CHH DMR regions. Red indicates increased point cloud density.
