# Supplementary material for: DNA methylation profiles of diverse Brachypodium distachyon align with underlying genetic diversity
Source: HighWire-hosted journal article supplement (doi:10.1101/gr.205468.116), 2016-09-09
Supplement: Supplemental_Fig_S17.pdf [file Supplemental_Fig_S17.pdf]

A

Minimum 10 reads  
all samples

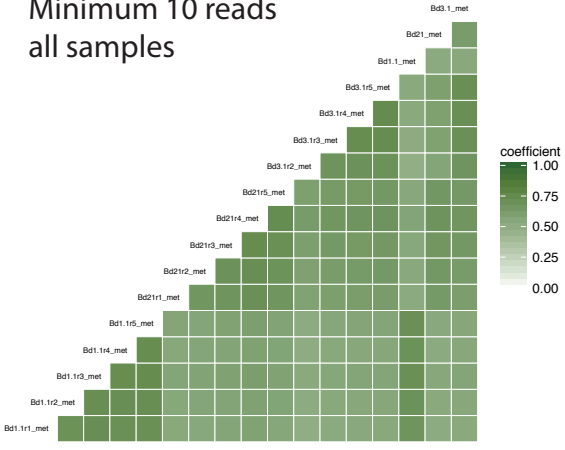

Minimum 20 reads  
all samples

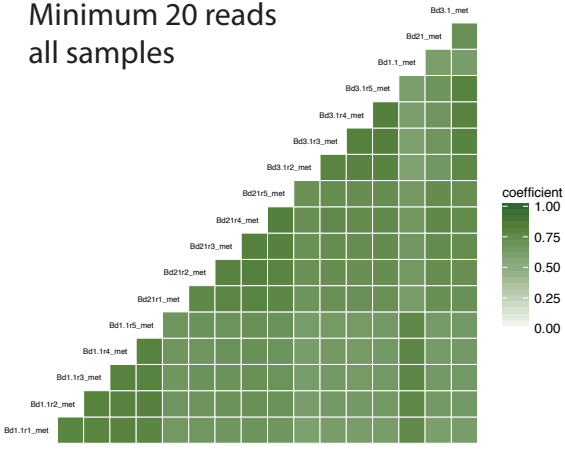

Minimum 30 reads  
all samples

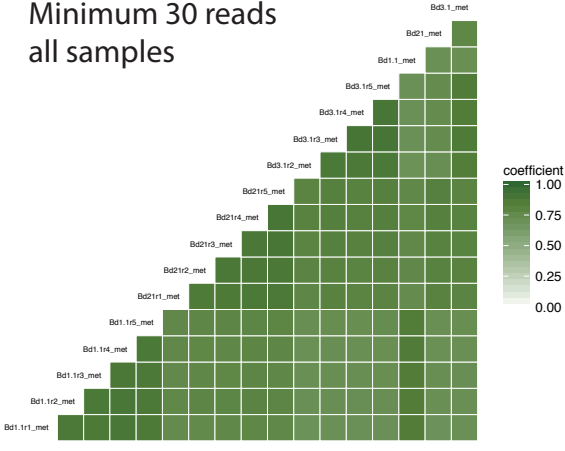

Minimum 40 reads  
all samples

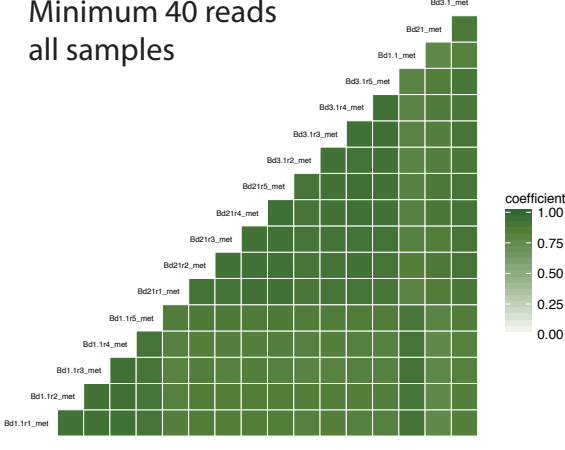

B

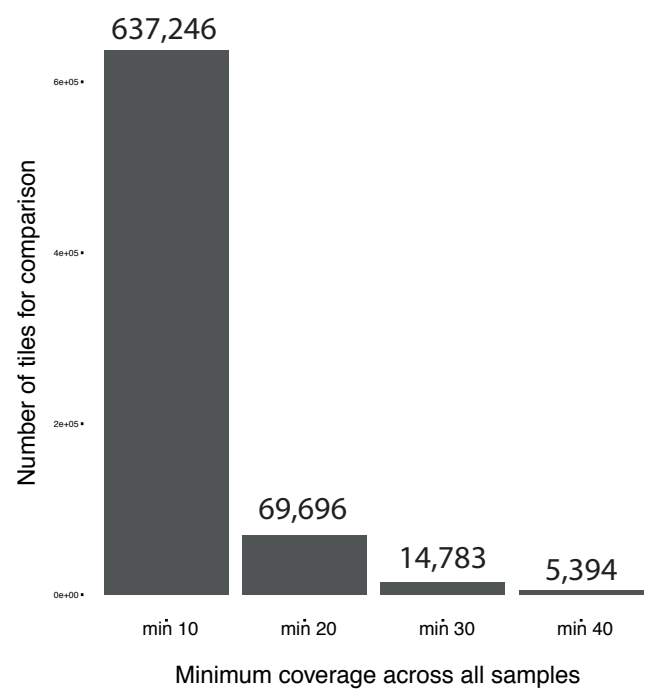

**Supplemental Figure 17: (A)** Correlation heatmaps for CHH sites requiring various minimum read depth. **(B)** Barplot of number of sites available for analysis given minimum read depth filtering.
