# Supplementary material for: DNA methylation profiles of diverse Brachypodium distachyon align with underlying genetic diversity
Source: HighWire-hosted journal article supplement (doi:10.1101/gr.205468.116), 2016-09-09
Supplement: Supplemental_Fig_S18.pdf [file Supplemental_Fig_S18.pdf]

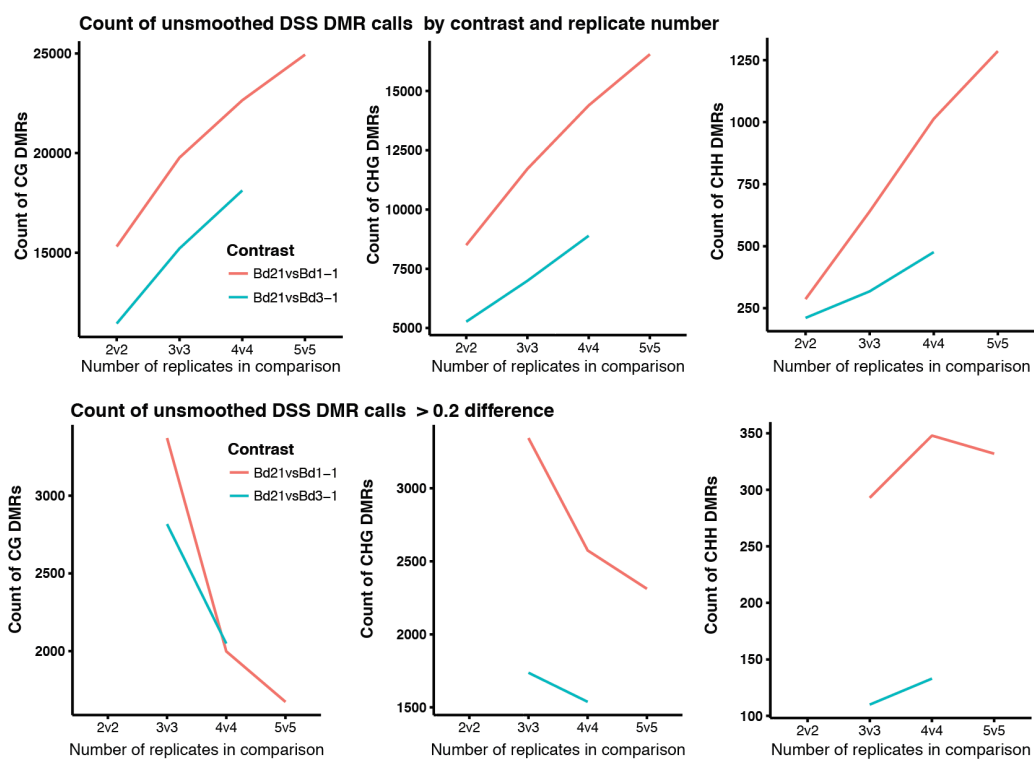

**Supplemental Figure 18.** Comparisons of unsmoothed DSS results for 2v2, 3v3, 4v4, and 5v5 (Bd1-1 only) replicate comparisons. Plots indicate total number of DMRs called (top panels) and the number of DMRs with differences between accessions > 0.2 (bottom panels).
