# Supplementary material for: DNA methylation profiles of diverse Brachypodium distachyon align with underlying genetic diversity
Source: HighWire-hosted journal article supplement (doi:10.1101/gr.205468.116), 2016-09-09
Supplement: Supplemental_Fig_S20.pdf [file Supplemental_Fig_S20.pdf]

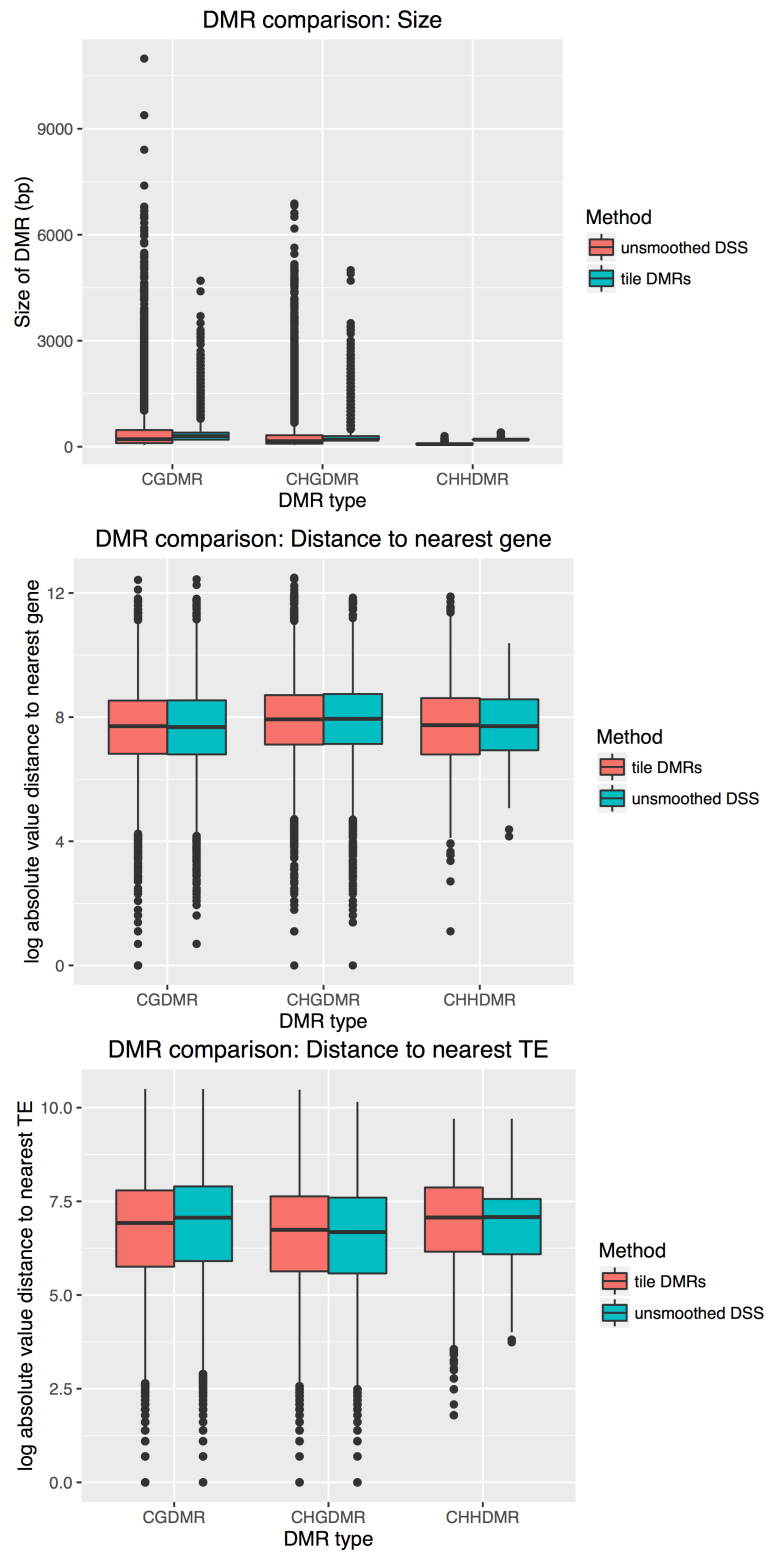

**Supplemental Figure 20.** Boxplots of size (top), log distance to nearest annotated gene (center), and log distance to nearest annotated te (bottom) for 100bp tile DMRs compared to unsmoothed DSS DMRs.
