# Supplementary material for: DNA methylation profiles of diverse Brachypodium distachyon align with underlying genetic diversity
Source: HighWire-hosted journal article supplement (doi:10.1101/gr.205468.116), 2016-09-09
Supplement: Supplemental_Fig_S21.pdf [file Supplemental_Fig_S21.pdf]

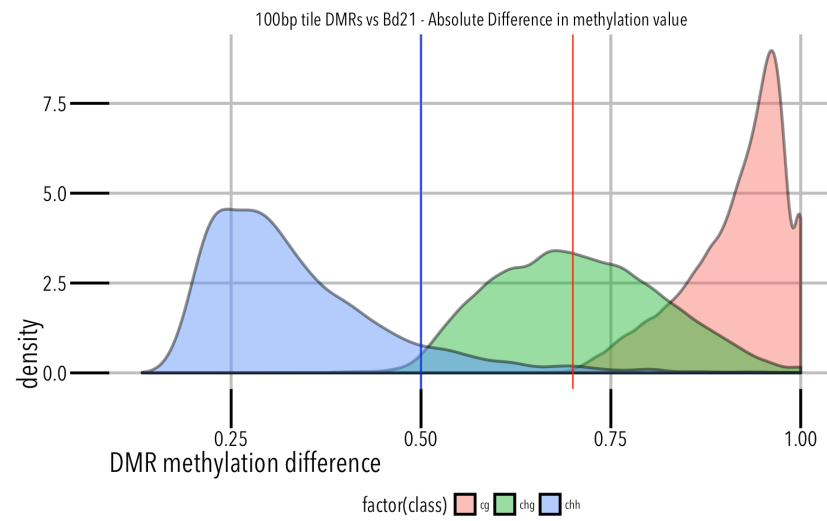

**Supplemental Figure 21.** Density distribution of methylation differences between accession groups in 100bp tile DMRs. Vertical bars indicate fixed cutoff for CG (red) and CHG (blue) DMRs.
