# Supplementary material for: DNA methylation profiles of diverse Brachypodium distachyon align with underlying genetic diversity
Source: HighWire-hosted journal article supplement (doi:10.1101/gr.205468.116), 2016-09-09
Supplement: Supplemental_Fig_S24.pdf [file Supplemental_Fig_S24.pdf]

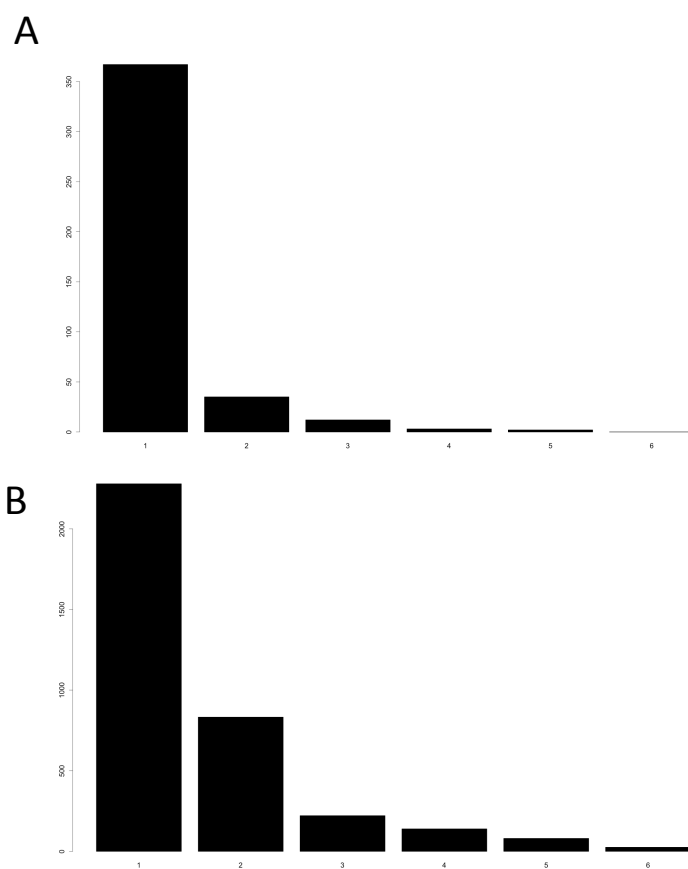

**Supplemental Figure 24.** Barplots indicating the number of genotypes individual transposable elements are inserted (A) or deleted (B) across samples.
