# Supplementary material for: DNA methylation profiles of diverse Brachypodium distachyon align with underlying genetic diversity
Source: HighWire-hosted journal article supplement (doi:10.1101/gr.205468.116), 2016-09-09
Supplement: Supplemental_Fig_S25.pdf [file Supplemental_Fig_S25.pdf]

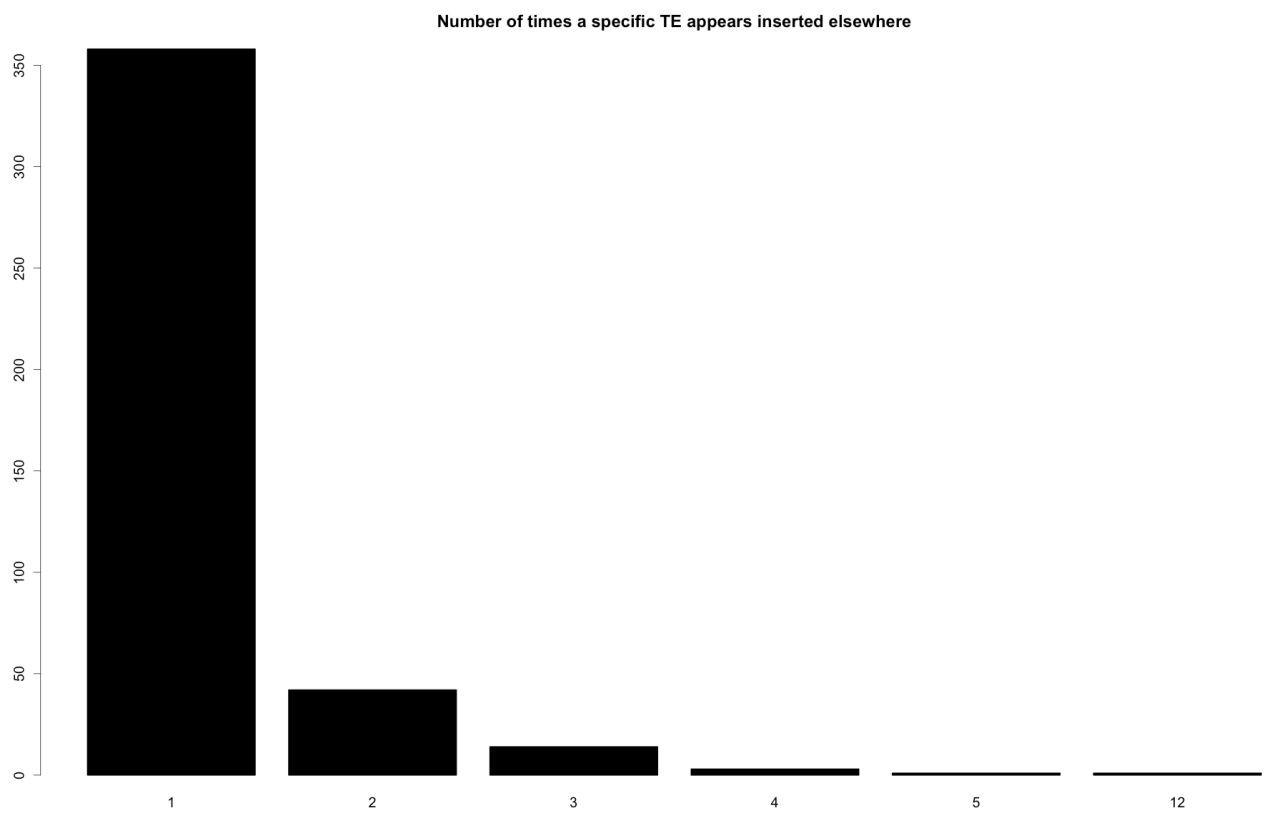

**Supplemental Figure 25:** Tes inserted into multiple genotypes and/or multiple times in a single sample
