# Supplementary material for: DNA methylation profiles of diverse Brachypodium distachyon align with underlying genetic diversity
Source: HighWire-hosted journal article supplement (doi:10.1101/gr.205468.116), 2016-09-09
Supplement: Supplemental_Fig_S26.pdf [file Supplemental_Fig_S26.pdf]

A

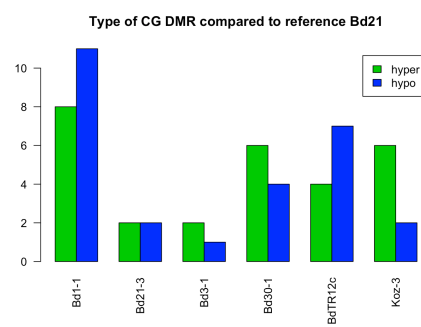

B

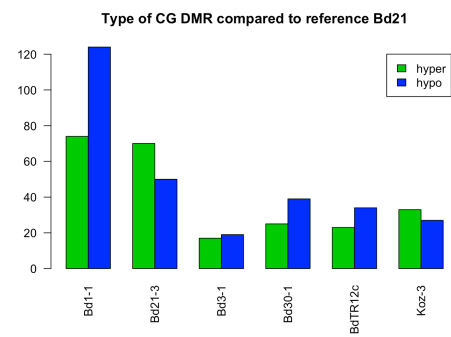

**Supplemental Figure 26.** Barplots indicating the DMR state (hyper or hypomethylated) compared to the Bd21 reference methylation state for DMRs within 500bp of (A) transposable element insertions and (B) deletions
